# Supplementary material for: ATR expands embryonic stem cell fate potential in response to replication stress
Source: eLife. 2020 Mar 12;9:e54756. doi: 10.7554/eLife.54756 (PMC7067586; doi:10.7554/eLife.54756)
Supplement: Figure 1—source data 1. [file elife-54756-fig1-data1.xlsx]

## Sheet: Figure 1
	Figure 1
	e	Fold change of pZscan4-Emerald positive ESCs normalized to CNTL
			CNTL	APH 0.3uM	APH 0.6uM	HU 100uM	HU 200uM	UV 5J/m2	UV 10J/m2
		Experiment 1	1.02	3.88	5.38	3.38	5.08	3.15	3.65
		Experiment 2	0.98	3.79	5.74	3.07	4.98	2.64	3.93
		AVERAGE	1	3.835	5.56	3.225	5.03	2.895	3.79
		STDV	0.0282843	0.0636396	0.254558	0.219203	0.0707107	0.360624	0.19799
		Relative mRNA expression (normalized to GAPDH)
			CNTL			APH			CNTL	APH	CNTL	APH
			Replicate 1	Replicate 2	Replicate 3	Replicate 1	Replicate 2	Replicate 3	AVERAGE	AVERAGE	STDV	STDV
	g	Dux	0.9	0.85	1.25	2.37	2.52	2.37	1	2.42	0.217945	0.0866025
	h	MERVL	0.97	1.03	1	2.08	2.04	2.04	1	2.05333	0.03	0.023094
	i	Gm4981	0.87	1.32	0.82	1.62	1.85	2.04	1.00333	1.83667	0.275379	0.210317
	j	Zscan4c	1.15	1.15	0.69	4.45	4.67	4.12	0.996667	4.41333	0.265581	0.276827

## Sheet: Figure 1- supplementary 1
Figure 1- supplementary 1
						Western quantification
							GAPDH		Zscan4			p-Chk1
e							Rel Density		Rel Density	Adj. Density		Rel Density	Adj. Density
						CNTL 30 min	1		1	1		1	1
						APH 30 min	1.01145		1.27296	1.25855		8.56274	8.46578
						APH 1h	1.03801		1.37285	1.32257		12.025	11.5846
						APH 2h	1.24628		0.848288	0.680654		12.8995	10.3504
						APH 4h	1.23792		1.94664	1.57251		9.3623	7.56295
						APH 8h	1.28804		2.9863	2.3185		9.04454	7.02197
						CNTL 8h	1.30119		1.1771	0.904627		1.42477	1.09497

## Sheet: Figure 1- supplementary 2
Figure 1- supplementary 2
a	MERVL
	Relative mRNA expression (normalized to GAPDH)
		CNTL	APH 0.4uM	APH 0.8uM	APH 1.5uM	APH 3uM	APH 6uM
	Replicate 1	0.91	1.33	1.55	1.76	2.03	2.94
	Replicate 2	1.16	1.35	1.49	1.66	2.26	2.77
	Replicate 3	0.93	1.32	1.42	1.69	2.3	2.81
	AVERAGE	1	1.33333	1.48667	1.70333	2.19667	2.84
	STDV	0.138924	0.0152753	0.0650641	0.051316	0.145717	0.0888819
b	Dux
	Relative mRNA expression (normalized to GAPDH)
		CNTL	APH 0.4uM	APH 0.8uM	APH 1.5uM	APH 3uM	APH 6uM
	Replicate 1	1.01	1.74	1.96	2.22	4.57	9.1
	Replicate 2	0.99	1.86	2.1	3.04	3.85	9.62
	Replicate 3	0.99	1.73	2.06	2.52	3.35	8.73
	AVERAGE	0.996667	1.77667	2.04	2.59333	3.92333	9.15
	STDV	0.011547	0.0723418	0.072111	0.41489	0.613297	0.447102
c	Tcstv3
	Relative mRNA expression (normalized to GAPDH)
		CNTL	APH 0.4uM	APH 0.8uM	APH 1.5uM	APH 3uM	APH 6uM
	Replicate 1	1	1.93	2.12	2.91	4.2	7.96
	Replicate 2	1.02	1.74	2.15	2.82	4.35	8.42
	Replicate 3	1.09	1.82	2.32	2.8	4.23	8.77
	AVERAGE	1.03667	1.83	2.19667	2.84333	4.26	8.38333
	STDV	0.0472582	0.0953939	0.107858	0.0585947	0.0793725	0.406243
d	GM4340
	Relative mRNA expression (normalized to GAPDH)
		CNTL	APH 0.4uM	APH 0.8uM	APH 1.5uM	APH 3uM	APH 6uM
	Replicate 1	1	1.53	1.6	1.79	2.23	3.54
	Replicate 2	0.98	1.45	1.59	1.77	2.22	3.66
	Replicate 3	1.01	1.56	1.58	1.76	2.31	3.66
	AVERAGE	0.996667	1.51333	1.59	1.77333	2.25333	3.62
	STDV	0.0152753	0.0568624	0.01	0.0152753	0.0493288	0.069282
e	Zscan4d
	Relative mRNA expression (normalized to GAPDH)
		CNTL	APH 0.4uM	APH 0.8uM	APH 1.5uM	APH 3uM	APH 6uM
	Replicate 1	1	1.22	1.26	1.7	2.16	3.47
	Replicate 2	0.96	1.26	1.35	1.72	2	3.49
	Replicate 3	0.91	1.29	1.34	1.66	1.95	3.71
	AVERAGE	0.956667	1.25667	1.31667	1.69333	2.03667	3.55667
	STDV	0.0450925	0.0351188	0.0493288	0.0305505	0.109697	0.133167
f	GM12794
	Relative mRNA expression (normalized to GAPDH)
		CNTL	APH 0.4uM	APH 0.8uM	APH 1.5uM	APH 3uM	APH 6uM
	Replicate 1	1	1.39	1.65	2.38	3.32	4.94
	Replicate 2	0.99	1.47	1.77	2.57	3.23	5.07
	Replicate 3	0.92	1.53	1.98	2.65	3.34	5.04
	AVERAGE	0.97	1.46333	1.8	2.53333	3.29667	5.01667
	STDV	0.043589	0.0702377	0.167033	0.138684	0.0585947	0.0680686
g	Fold change of MERVL-GFP positve ESCs normalized to CNTL
		CNTL	APH 0.3uM	APH 6uM
	Experiment 1	1.02	3.88	5.38
	Experiment 2	0.98	3.79	5.74
	AVERAGE	1	3.835	5.56
	STDV	0.0282843	0.0636396	0.254558
i	Relative mRNA expression (normalized to GAPDH)
		CNTL			APH 3uM			APH 6uM			CNTL	APH 3uM	APH 6uM	CNTL	APH 3uM	APH 6uM
		Replicate 1	Replicate 2	Replicate 3	Replicate 1	Replicate 2	Replicate 3	Replicate 1	Replicate 2	Replicate 3	AVERAGE			STDV
	MEF #1	0.97	0.97	1.06	0.81	0.94	0.83	0.86	0.87	0.82	1	0.86	0.85	0.0519615	0.07	0.0264575
	MEF #2	1.16	1.24	1.2	1.12	1.12	1.04	1.21	1.27	1.01	1.2	1.09333	1.16333	0.04	0.046188	0.136137
k					Western quantification
						GAPDH		ZSCAN4			OCT4			SOX2
						Rel Density		Rel Density	Adj. Density		Rel Density	Adj. Density		Rel Density	Adj. Density
					DUX OE-DOX	1		1	1		1	1		1	1
					DUX OE+DOX	1.2413		6.03402	4.86104		0.0138065	0.0111226		0.405886	0.326984
					CNTL	0.67942		0.498339	0.733478		0.777127	1.14381		0.87276	1.28457
					APH	0.856139		0.568003	0.663447		0.581321	0.679003		0.71238	0.832084
			E14-UT			E14-APH			R1-UT			R1-APH			E14-UT	E14-APH	R1-UT	R1-APH
			Replicate 1	Replicate 2	Replicate 3	Replicate 1	Replicate 2	Replicate 3	Replicate 1	Replicate 2	Replicate 3	Replicate 1	Replicate 2	Replicate 3	AVERAGE
	l	Nanog	1.05	1.02	0.93	0.79	0.9	0.83	0.7	0.89	0.86	0.64	0.65	0.69	1	0.84	0.816667	0.66
	m	Oct4	0.93	1	1.07	0.92	0.75	0.86	0.48	0.33	0.32	0.47	0.4	0.44	1	0.843333	0.376667	0.436667
	n	Rex1	0.99	0.98	1.03	0.81	0.89	0.96	0.58	0.69	0.73	0.81	0.74	0.75	1	0.886667	0.666667	0.766667

## Sheet: Figure 1- supplementary 3
Figure 1- supplementary 3
			Relative mRNA expression (normalized to GAPDH)
				CNTL			APH			CNTL	APH	CNTL	APH
				Replicate 1	Replicate 2	Replicate 3	Replicate 1	Replicate 2	Replicate 3	AVERAGE		STDV
		c	Dux	1	1.02	0.98	3.29	2.78	3.96	1	3.34333	0.02	0.591805
		d	MERVL	0.93	1.03	1.04	2.33	2.36	2.25	1	2.31333	0.0608276	0.0568624
		e	GM4981	1	1.09	0.91	5.4	6.65	6.38	1	6.14333	0.09	0.657749
			Relative mRNA expression (normalized to GAPDH)
				CNTL			APH			CNTL	APH	CNTL	APH
				Replicate 1	Replicate 2	Replicate 3	Replicate 1	Replicate 2	Replicate 3	AVERAGE		STDV
		f	Dux	1.03	0.97	1	2.7	2.87	2.7	1	2.75667	0.03	0.0981495
		g	MERVL	0.97	1.03	1	1.54	1.51	1.51	1	1.52	0.03	0.0173205
		h	GM4981	1.03	0.99	0.97	2.33	2.21	2.43	0.996667	2.32333	0.0305505	0.110151
