# Supplementary material for: ATR expands embryonic stem cell fate potential in response to replication stress
Source: eLife. 2020 Mar 12;9:e54756. doi: 10.7554/eLife.54756 (PMC7067586; doi:10.7554/eLife.54756)
Supplement: Figure 2—source data 1. [file elife-54756-fig2-data1.xlsx]

## Sheet: Figure 2
Figure 2
a		Fold change of pZscan4-Emerald positive ESCs normalized to CNTL
			CNTL	APH	APH+ATRi	APH+ATMi	ATRi	ATMi
		Experiment 1	1	4.2	1.3	4.5	0.6	1.1
		Experiment 2	1	3.6	1.3	3.2	0.5	1.1
		AVERAGE	1	3.9	1.3	3.85	0.55	1.1
		STDV	0	0.424264	0	0.919239	0.0707107	0
										Western quantification
b										GAPDH		p-CHK1			Tot-CHK1			ZSCAN4			Tot-CHK2
										Rel Density		Rel Density	Adj. Density		Rel Density	Adj. Density		Rel Density	Adj. Density		Rel Density	Adj. Density
									CNTL	1		1	1		1	1		1	1		1	1
									APH	0.92949		3.68622	3.96585		0.221096	0.237868		6.49405	6.98668		0.569651	0.612864
									APH+ATRi	1.20373		0.974244	0.809355		0.438996	0.364696		1.09917	0.913138		0.385356	0.320135
									APH+ATMi	1.15306		2.19183	1.90088		0.209486	0.181678		6.47837	5.61839		0.514434	0.446145
c		MERVL
		Relative mRNA expression (normalized to GAPDH)
			E14			R1			CNTL	APH	CNTL	APH
			Replicate 1	Replicate 2	Replicate 3	Replicate 1	Replicate 2	Replicate 3	AVERAGE	AVERAGE	STDV	STDV
		CNTL	1	0.98	1.01	2.14	2.2	2.22	0.996667	2.18667	0.0152753	0.0416333
		APH	3.36	3.52	3.4	3.91	3.99	3.99	3.42667	3.96333	0.0832666	0.046188
		APH+ATRi	2.05	1.96	2.48	2.59	2.51	2.56	2.16333	2.55333	0.277909	0.0404145
e
										Western quantification
										GAPDH		p-CHK1			Tot-CHK1			ZSCAN4			ATR
										Rel Density		Rel Density	Adj. Density		Rel Density	Adj. Density		Rel Density	Adj. Density		Rel Density	Adj. Density
									ATR +/+ UN	1		1	1		1	1		1	1		1	1
									ATR +/+ APH	1.08718		11.1873	10.2902		0.510831	0.469866		4.90215	4.50903		0.322567	0.296699
									ATR sec/sec UN	2.10357		0.590819	0.280864		0.920759	0.437712		0.382288	0.181733		0.0383717	0.0182412
									ATR sec/sec APH	1.83443		1.3902	0.757836		0.680766	0.371105		2.91172	1.58726		0.0129142	0.00703992
f
										Western quantification
										GAPDH		p-CHK1			Tot-CHK1			ZSCAN4
										Rel Density		Rel Density	Adj. Density		Rel Density	Adj. Density		Rel Density	Adj. Density
									chk+/+ line1 ut	1		1	1		1	1		1	1
									chk+/+ line1 aph	1.05038		8.08247	7.6948		0.311621	0.296674		23.8077	22.6658
									chk+/+ line2 ut	1.11731		1.3485	1.20692		0.731315	0.654533		1.61878	1.44883
									chk+/+ line2 aph	1.00093		9.94141	9.93218		0.230322	0.230108		25.0475	25.0243
									chk+/- line1 ut	1.25534		0.535077	0.426239		0.193742	0.154334		0.0662983	0.0528129
									chk+/- line1 aph	1.21017		1.75685	1.45174		0.0431944	0.0356929		0.820442	0.677956
									chk+/- line2 ut	1.54936		0.737993	0.476322		0.279355	0.180303		0.310497	0.200404
									chk+/- line2 aph	1.11173		1.74227	1.56717		0.0862163	0.0775514		2.57735	2.31832
		Relative mRNA expression (normalized to GAPDH)
			ATR +/+, UT			ATR +/+, APH			ATR sec/sec, UT			ATR sec/sec, APH			ATR +/+, UT	ATR +/+, APH	ATR sec/sec, UT	ATR sec/sec, APH	ATR +/+, UT	ATR +/+, APH	ATR sec/sec, UT	ATR sec/sec, APH
			Replicate 1	Replicate 2	Replicate 3	Replicate 1	Replicate 2	Replicate 3	Replicate 1	Replicate 2	Replicate 3	Replicate 1	Replicate 2	Replicate 3	AVERAGE				STDV
	g	Dux	0.91	1.01	1.08	24.81	24.47	20.87	0.88	0.67	0.64	9.17	8.49	8.92	1	23.3833	0.73	8.86	0.08544	2.18324	0.130767	0.343948
	h	GM4981	0.76	1.01	1.23	28.76	33.5	30.4	0.9	0.64	0.56	13.17	15.45	13.26	1	30.8867	0.7	13.96	0.23516	2.40718	0.177764	1.29116
	i	Zscan4d	0.98	0.98	1.05	15.38	15.81	16.59	0.57	0.6	0.55	8	8.06	8.46	1.00333	15.9267	0.573333	8.17333	0.0404145	0.613379	0.0251661	0.250067
	j	GM12794	0.98	0.98	1.04	17.22	17.58	18.46	0.72	0.65	0.79	8.09	8.15	7.98	1	17.7533	0.72	8.07333	0.034641	0.637913	0.07	0.0862168
	k	MERVL	0.98	1	1.02	7.48	7.64	7.69	0.59	0.61	0.59	3.74	3.49	3.46	1	7.60333	0.596667	3.56333	0.02	0.109697	0.011547	0.153731

## Sheet: Figure 2 supplementary 1
	Figure 2 supplementary 1
a	FACS Fold change of pZscan4-Emerald positive ESCs normalized to CNTL
		CNTL	HU	HU+ATRi	HU+ATMi	ATRi	ATMi
	Experiment 1	1	4.8	2.2	5	0.4	0.8
	Experiment 2	1.1	3.9	2.3	3.7	0.5	1.1
	AVERAGE	1.05	4.35	2.25	4.35	0.45	0.95
	STDV	0.0707107	0.636396	0.0707107	0.919239	0.0707107	0.212132
b	Dux
	Relative mRNA expression (normalized to TBP)
		CNTL	APH 0.4uM	APH 0.8uM	APH 1.5uM
	Replicate 1	1	1.73	1.38	0.27
	Replicate 2	0.88	1.73	1.32	0.39
	Replicate 3	0.69	2.47	1.18	0.39
	AVERAGE	0.856667	1.97667	1.29333	0.35
	STDV	0.156312	0.427239	0.102632	0.069282
	FACS Fold change of γH2AX p-CHK1 positive ESCs normalized to CNTL
		Total		Em+		Em-		Total	Em+	Em-	Total	Em+	Em-
		Experiment 1	Experiment 2	Experiment 1	Experiment 2	Experiment 1	Experiment 2	AVERAGE			STDV
c	γH2AX	1	1	2.7	2.6	0.7	0.9	1	2.65	0.8	0	0.0707107	0.141421
d	p-CHK1	1	1.1	3.1	2.9	0.9	1	1.05	3	0.95	0.0707107	0.141421	0.0707107
e						Western quantification
						GAPDH		ZSCAN4			p-CHK1			CHK2
						Rel Density		Rel Density	Adj. Density		Rel Density	Adj. Density		Rel Density	Adj. Density
					CNTL	1		1	1		1	1		1	1
					UV	0.95346		10.0021	10.4903		5.96656	6.2578		0.981342	1.02924
					UV+ATRi	0.778355		2.51519	3.23142		0.579992	0.745151		0.803964	1.0329
					UV+ATMi	0.953055		9.67919	10.156		5.77434	6.05877		0.741782	0.77832
						Western quantification
f						GAPDH		ZSCAN4			p-CHK1			CHK2
						Rel Density		Rel Density	Adj. Density		Rel Density	Adj. Density		Rel Density	Adj. Density
					CNTL	1		1	1		1	1		1	1
					APH 8h	1.10608		1.91736	1.73348		5.5719	5.03754		1.10483	0.998871
					APH+ATRi	0.982531		1.00652	1.02442		2.40373	2.44647		1.16458	1.18529
					APH+ATMi	0.983346		1.7989	1.82937		4.64093	4.71953		1.04801	1.06576
g	Zscan4
	Relative mRNA expression (normalized to GAPDH)
		E14			R1			CNTL	APH	CNTL	APH
		Replicate 1	Replicate 2	Replicate 3	Replicate 1	Replicate 2	Replicate 3	AVERAGE	AVERAGE	STDV	STDV
	CNTL	1.05	1.14	0.81	1.09	1.24	1.24	1	1.19	0.170587	0.0866025
	APH	14.43	14.64	13.01	15.2	14.79	14.99	14.0267	14.9933	0.886698	0.20502
	APH+ATRi	4.31	4.16	4.46	2.55	3.02	3.44	4.31	3.00333	0.15	0.445234
h						Western quantification
						GAPDH		ATM
						Rel Density		Rel Density	Adj. Density
					ATM +/+	1		1	1
					ATM-/-	1.13977		0.0516132	0.0452839
i	Dux
	Relative mRNA expression (normalized to GAPDH)
		ATM+/+, CNTL	ATM+/+, APH	ATM-/-, CNTL	ATM-/-, APH
	Replicate 1	1	10.08	0.73	14.55
	Replicate 2	0.64	11.03	0.69	15.28
	Replicate 3	0.91	11.03	0.44	14.55
	AVERAGE	0.85	10.7133	0.62	14.7933
	STDV	0.18735	0.548483	0.157162	0.421466
j	Zscan4
	Relative mRNA expression (normalized to GAPDH)
		ATM+/+, CNTL	ATM+/+, APH	ATM-/-, CNTL	ATM-/-, APH
	Replicate 1	1	11.66	1.26	10.95
	Replicate 2	0.99	11.03	1.25	10.65
	Replicate 3	0.93	11.58	1.28	11.03
	AVERAGE	0.973333	11.4233	1.26333	10.8767
	STDV	0.0378594	0.342977	0.0152753	0.200333
k	Dux
	Relative mRNA expression (normalized to GAPDH)
		CNTL	APH	APH + P38i-1 (5uM)	APH + P38i-1 (10uM)	APH + P38i-2 (5uM)	APH + P38i-2 (10uM)
	Replicate 1	1	19.16	15.89	14.83	17.15	26.11
	Replicate 2	1.79	14.52	14.32	13.93	14.22	22.73
	Replicate 3	1.39	19.97	18.9	14.03	13.55	19.65
	AVERAGE	1.39333	17.8833	16.37	14.2633	14.9733	22.83
	STDV	0.395011	2.94075	2.32742	0.493288	1.91458	3.23116

## Sheet: Figure 2 supplementary 2
	Figure 2 supplementary 2
	Relative mRNA expression (normalized to GAPDH)
		ATR +/+, UT			ATR +/+, APH			ATR sec/sec, UT			ATR sec/sec, APH			ATR +/+, UT	ATR +/+, APH	ATR sec/sec, UT	ATR sec/sec, APH	ATR +/+, UT	ATR +/+, APH	ATR sec/sec, UT	ATR sec/sec, APH
		Replicate 1	Replicate 2	Replicate 3	Replicate 1	Replicate 2	Replicate 3	Replicate 1	Replicate 2	Replicate 3	Replicate 1	Replicate 2	Replicate 3	AVERAGE				STDV
c	Tcstv3	0.97	0.98	1.05	23.3	23.79	23.79	0.73	0.72	0.75	7.69	8.35	8.53	1	23.6267	0.733333	8.19	0.043589	0.282902	0.0152753	0.442267
d	GM4340	0.96	1.04	1	19.42	19.15	19.15	0.67	0.66	0.68	4.79	4.96	4.92	1	19.24	0.67	4.89	0.04	0.155885	0.01	0.0888819
e	Tdpoz3	1.02	1.02	0.97	3.26	3.49	3.59	0.83	0.75	0.72	2.05	1.67	1.4	1.00333	3.44667	0.766667	1.70667	0.0288675	0.169214	0.0568624	0.326548
f	Eif1a	0.97	1.01	1.02	3.69	3.95	3.93	0.76	0.84	0.84	1.79	1.9	2.07	1	3.85667	0.813333	1.92	0.0264575	0.144684	0.046188	0.141067
	FACS Fold change of Zscan4 positive ESCs normalized to CNTL
g		Chk1 +/+, line 1	Chk1 +/+, line 2	Chk1 +/-, line 1	Chk1 +/-, line 2
	Experiment 1	1.41	2.15	0.23	0.4
	Experiment 2	1.15	2.04	0.16	0.54
	AVERAGE	1.28	2.095	0.195	0.47
	STDV	0.183848	0.0777817	0.0494975	0.0989949
	Relative mRNA expression (normalized to GAPDH)
		CHK1 +/+, UT			CHK1 +/+, APH			CHK1 +/-, UT			CHK1 +/-, APH			CHK1 +/+, UT	CHK1 +/+, APH	CHK1 +/-, UT	CHK1 +/-, APH	CHK1 +/+, UT	CHK1 +/+, APH	CHK1 +/-, UT	CHK1 +/-, APH
		Replicate 1	Replicate 2	Replicate 3	Replicate 1	Replicate 2	Replicate 3	Replicate 1	Replicate 2	Replicate 3	Replicate 1	Replicate 2	Replicate 3	AVERAGE				STDV
h	Zscan4d	1.1	0.95	0.94	17.91	20.29	18.54	0.44	0.48	0.4	4.29	5.03	4.41	0.996667	18.9133	0.44	4.57667	0.0896289	1.23314	0.04	0.397157
i	GM4340	1.05	0.92	1.04	19.89	19.48	21.92	0.62	0.64	0.6	5.07	4.89	5.1	1.00333	20.43	0.62	5.02	0.0723418	1.30656	0.02	0.113578
j	GM12794	1.06	1.02	0.91	19.16	22.63	22.95	0.98	1.08	1.2	7.87	8.1	8.92	0.996667	21.58	1.08667	8.29667	0.0776745	2.10188	0.110151	0.551936
k	Tcstv3	1.07	0.92	1.02	30.35	29.94	32.08	0.74	0.8	0.75	8.76	8.76	8.88	1.00333	30.79	0.763333	8.8	0.0763763	1.13583	0.0321455	0.069282
l	MERVL	0.97	1.02	1.01	9	8.63	8.81	0.94	0.96	0.97	4.49	4.58	4.43	1	8.81333	0.956667	4.5	0.0264575	0.185023	0.0152753	0.0754983
m	Tdpoz3	1.05	1.08	0.88	4.77	3.98	4.71	1.73	1.78	1.64	2.93	3.05	2.93	1.00333	4.48667	1.71667	2.97	0.107858	0.439811	0.070946	0.069282
n	Eif1a	1	0.99	1.02	3.56	3.44	3.56	0.96	0.94	0.95	1.61	1.59	1.66	1.00333	3.52	0.95	1.62	0.0152753	0.069282	0.01	0.0360555
o	Trp53
	Relative mRNA expression (normalized to GAPDH)
		sc siRNA	Trp53 siRNA
	Replicate 1	1.01	0.26
	Replicate 2	0.96	0.24
	Replicate 3	1.03	0.25
	AVERAGE	1	0.25
	STDV	0.0360555	0.01
p						Western quantification
						GAPDH		p-P53			tot-P53			ZSCAN4			p-CHK1
						Rel Density		Rel Density	Adj. Density		Rel Density	Adj. Density		Rel Density	Adj. Density		Rel Density	Adj. Density
					CNTL, sc siRNA	1		1	1		1	1		1	1		1	1
					CNTL, Trp53 siRNA	0.943892		0.000120746	0.000127924		5.71086e-05	6.05033e-05		1.04827	1.11058		1.27328	1.34897
					APH, sc siRNA	0.953036		10.1465	10.6465		3.12943	3.28364		2.4796	2.60179		18.1607	19.0556
					APH, Trp53 siRNA	0.881362		9.12184	10.3497		2.12381	2.40969		2.35441	2.67133		17.7336	20.1207
q	Trp53
	Relative mRNA expression (normalized to GAPDH)
		p53WT	p53KO
	Replicate 1	1	0.002
	Replicate 2	1.007	0.002
	Replicate 3	1.014	0.002
	AVERAGE	1.007	0.002
	STDV	0.007	0
r	Dux
	Relative mRNA expression (normalized to GAPDH)
		p53WT, CNTL	p53WT, APH	p53KO, CNTL	p53KO, APH
	Replicate 1	1	8	1.83	7.75
	Replicate 2	1.17	8.69	1.04	6.6
	Replicate 3	1.06	7.21	1.65	8.71
	AVERAGE	1.07667	7.96667	1.50667	7.68667
	STDV	0.0862168	0.740563	0.414045	1.05642
