# Supplementary material for: ATR expands embryonic stem cell fate potential in response to replication stress
Source: eLife. 2020 Mar 12;9:e54756. doi: 10.7554/eLife.54756 (PMC7067586; doi:10.7554/eLife.54756)
Supplement: Figure 3—source data 1. [file elife-54756-fig3-data1.xlsx]

## Sheet: Figure 3
	Figure 3
	Relative mRNA expression (normalized to GAPDH)
		CNTL, sc siRNA			APH, sc siRNA			APH, Dux siRNA			CNTL, sc siRNA	APH, sc siRNA	APH, Dux siRNA	CNTL, sc siRNA	APH, sc siRNA	APH, Dux siRNA
		Replicate 1	Replicate 2	Replicate 3	Replicate 1	Replicate 2	Replicate 3	Replicate 1	Replicate 2	Replicate 3	AVERAGE			STDV
e	Dux	1.02	0.84	1.14	8.57	9.71	10.33	1.7	1.66	1.69	1	9.53667	1.68333	0.150997	0.892711	0.0208167
f	MERVL	1.06	0.99	0.95	2.76	2.67	2.37	0.33	0.29	0.26	1	2.6	0.293333	0.0556776	0.204206	0.0351188
g	Zscan4	1.02	0.97	1.02	2.55	2.38	2.3	0.16	0.15	0.15	1.00333	2.41	0.153333	0.0288675	0.127671	0.0057735
								Western blot quantification
h
								GAPDH		p-CHK1			ZSCAN4
								Rel Density		Rel Density	Adj. Density		Rel Density	Adj. Density
							CNTL, sc siRNA	1		1	1		1	1
							APH, sc siRNA	1.25846		14.1074	11.2101		1.62918	1.29458
							CNTL, Dux siRNA	1.24843		1.21489	0.973135		0.0435361	0.0348726
							APH, Dux siRNA	1.85533		17.6797	9.52915		0.158009	0.0851653

## Sheet: Figure 3 supplementary 1
	Figure 3 supplementary 1
	Relative mRNA expression (normalized to GAPDH)
		E14-CNT			E14-APH			R1-CNT			R1-APH			E14-CNT	E14-APH	R1-CNT	R1-APH	E14-CNT	E14-APH	R1-CNT	R1-APH
		Replicate 1	Replicate 2	Replicate 3	Replicate 1	Replicate 2	Replicate 3	Replicate 1	Replicate 2	Replicate 3	Replicate 1	Replicate 2	Replicate 3	AVERAGE				STDV
c	Gm12794	0.7	1.3	1	10.26	10.47	10.33	0.68	0.64	0.7	14.81	10.54	9.44	1	10.3533	0.673333	11.5967	0.3	0.106927	0.0305505	2.83666
d	Zscan4d	0.81	1	1.18	4.72	4.86	4.86	1	1.05	1.05	8.98	8.73	8.79	0.996667	4.81333	1.03333	8.83333	0.185023	0.080829	0.0288675	0.130512
e	Gm4340	1.02	1.04	0.94	3.22	3.88	3.77	0.81	0.82	0.8	4.27	4.01	3.93	1	3.62333	0.81	4.07	0.052915	0.353601	0.01	0.177764
f	Tdpoz3	1	1.06	0.94	3.97	4.02	4.08	0.71	0.6	0.64	3.5	2.6	2.69	1	4.02333	0.65	2.93	0.06	0.0550757	0.0556776	0.495681
g	Tcstv3	1.07	1.02	0.91	4.27	4.21	3.93	0.26	0.27	0.28	2.59	2.65	2.78	1	4.13667	0.27	2.67333	0.0818535	0.181475	0.01	0.0971253
h	Eif1a	1.08	1.02	0.89	1.69	1.68	1.53	0.6	0.63	0.67	1.52	1.53	1.55	0.996667	1.63333	0.633333	1.53333	0.0971253	0.0896289	0.0351188	0.0152753
i	MERVL-Pol
	Relative mRNA expression (normalized to GUSB)
		CNTL	APH	APH+ ATRi
	Replicate 1	1.02	2.08	0.77
	Replicate 2	1.02	2.11	0.88
	Replicate 3	0.96	2.12	0.87
	AVERAGE	1	2.10333	0.84
	STDV	0.034641	0.0208167	0.0608276
j	MT2
	Relative mRNA expression (normalized to GUSB)
		CNTL	APH	APH+ ATRi
	Replicate 1	1.01	1.2	0.74
	Replicate 2	1	1.52	0.77
	Replicate 3	0.98	1.56	0.78
	AVERAGE	0.996667	1.42667	0.763333
	STDV	0.0152753	0.197315	0.0208167
k	MERVL-int
	Relative mRNA expression (normalized to GUSB)
		CNTL	APH	APH+ ATRi
	Replicate 1	1.04	1.46	0.69
	Replicate 2	1.02	1.39	0.67
	Replicate 3	0.94	1.32	0.73
	AVERAGE	1	1.39	0.696667
	STDV	0.052915	0.07	0.0305505

## Sheet: Figure 3 supplementary 2
	Figure 3 supplementary 2
a	Dux
	Relative mRNA expression (normalized to GAPDH)
		Dux-WT				Dux-KO
		CNTL	APH	APH + ATRi	ATRi	CNTL	APH	APH + ATRi	ATRi
	Replicate 1	1.05	5.23	3.42	0.64	0	0.01	0	0.01
	Replicate 2	0.96	5.19	3.59	0.73	0	0.01	0	0.01
	Replicate 3	0.99	5.12	3.14	0.7	0	0.01	0	0.01
	AVERAGE	1	5.18	3.38333	0.69	0	0.01	0	0.01
	STDV	0.0458258	0.0556776	0.22723	0.0458258	0	0	0	0
b	Zscan4
	Relative mRNA expression (normalized to GAPDH)
		Dux-WT				Dux-KO
		CNTL	APH	APH + ATRi	ATRi	CNTL	APH	APH + ATRi	ATRi
	Replicate 1	1.04	2.47	1.17	0.72	0	0	0	0
	Replicate 2	1	2.44	1.15	0.63	0	0	0	0
	Replicate 3	0.96	2.4	1.11	0.64	0	0	0	0
	AVERAGE	1	2.43667	1.14333	0.663333	0	0	0	0
	STDV	0.04	0.0351188	0.0305505	0.0493288	0	0	0	0
c	MERVL
	Relative mRNA expression (normalized to GAPDH)
		Dux-WT				Dux-KO
		CNTL	APH	APH + ATRi	ATRi	CNTL	APH	APH + ATRi	ATRi
	Replicate 1	1.12	2.42	0.72	0.82	0.09	0.06	0.03	0.06
	Replicate 2	0.84	2.06	0.86	0.83	0.08	0.06	0.03	0.06
	Replicate 3	1.04	2.38	0.81	0.83	0.09	0.06	0.03	0.06
	AVERAGE	1	2.28667	0.796667	0.826667	0.0866667	0.06	0.03	0.06
	STDV	0.144222	0.197315	0.070946	0.0057735	0.0057735	0	0	0
d	Dux
	Relative mRNA expression (normalized to GAPDH)
		CNTL, sc siRNA	CNTL, Dux siRNA
	Replicate 1	1.08	0.44
	Replicate 2	0.94	0.57
	Replicate 3	0.98	0.19
	AVERAGE	1	0.4
	STDV	0.072111	0.193132
e	MERVL
	Relative mRNA expression (normalized to GAPDH)
		CNTL, sc siRNA	CNTL, Dux siRNA
	Replicate 1	0.99	0.36
	Replicate 2	1.06	0.33
	Replicate 3	0.95	0.28
	AVERAGE	1	0.323333
	STDV	0.0556776	0.0404145
f	Zscan4
	Relative mRNA expression (normalized to GAPDH)
		CNTL, sc siRNA	CNTL, Dux siRNA
	Replicate 1	0.91	0.05
	Replicate 2	1.02	0.03
	Replicate 3	1.07	0.04
	AVERAGE	1	0.04
	STDV	0.0818535	0.01
