# Supplementary material for: ATR expands embryonic stem cell fate potential in response to replication stress
Source: eLife. 2020 Mar 12;9:e54756. doi: 10.7554/eLife.54756 (PMC7067586; doi:10.7554/eLife.54756)
Supplement: Figure 4—source data 1. [file elife-54756-fig4-data1.xlsx]

## Sheet: Figure 4
	Figure 4
b	Relative Dux mRNA expression (normalized to GAPDH)
		-Dox, CNTL	+Dox, CNTL	-Dox, ATRi	+Dox, ATRi	-Dox, ATMi	+Dox, ATMi
	Replicate 1	1.27	2.36	0.57	1.19	0.69	2.64
	Replicate 2	1.09	2.6	0.83	1.03	1.07	2.44
	Replicate 3	0.63	2.19	0.91	1.75	0.88	1.81
	AVERAGE	0.996667	2.38333	0.77	1.32333	0.88	2.29667
	STDV	0.330051	0.205994	0.177764	0.378065	0.19	0.433167
c								Western quantification
								VINCULIN		CHK2			gH2AX			p-CHK1
								Rel Density		Rel Density	Adj. Density		Rel Density	Adj. Density		Rel Density	Adj. Density
							-DOX	1		1	1		1	1		1	1
							+DOX	0.853856		1.11373	1.30436		17.0335	19.949		2.95315	3.45861
							-DOX, ATRi	0.657903		1.01215	1.53845		2.13099	3.23907		0.0792236	0.120418
							+DOX, ATRi	0.835268		1.2706	1.52119		7.74228	9.26922		0.0550507	0.0659079
							-DOX, ATMi	0.857554		1.23098	1.43546		3.38232	3.94415		1.41456	1.64953
							+DOX, ATMi	0.93042		1.39747	1.50198		21.959	23.6012		3.32034	3.56864
								GAG			ZSCAN4			ETAA1
								Rel Density	Adj. Density		Rel Density	Adj. Density		Rel Density	Adj. Density
							-DOX	1	1		1	1		1	1
							+DOX	6.41227	7.50977		5.46574	6.40124		254.289	297.813
							-DOX, ATRi	1.02288	1.55476		0.933606	1.41906		0.39759	0.60433
							+DOX, ATRi	2.34735	2.81029		1.87385	2.24342		466.578	558.597
							-DOX, ATMi	1.11798	1.30368		0.927108	1.08111		0.927711	1.08181
							+DOX, ATMi	2.39954	2.57899		3.92598	4.21958		481.614	517.631
d									Western quantification
									GAPDH		GAG			ZSCAN4			ETAA1
									Rel Density		Rel Density	Adj. Density		Rel Density	Adj. Density		Rel Density	Adj. Density
								-DOX, sc siRNA	1		1	1		1	1		1	1
								+DOX, sc siRNA	1.27112		2.06018	1.62076		1.76964	1.39219		16.3149	12.8351
								-DOX, Dux siRNA	1.30961		0.256198	0.195629		0.00981079	0.00749138		0.460632	0.351732
								+DOX, Dux siRNA	1.26076		0.240441	0.190711		0.02363	0.0187427		44.2207	35.0746
	Relative mRNA expression (normalized to GAPDH)
		-Dox, sc siRNA			+Dox, sc siRNA			-Dox, Dux siRNA			+Dox, Dux siRNA			-Dox, sc siRNA	+Dox, sc siRNA	-Dox, Dux siRNA	+Dox, Dux siRNA	-Dox, sc siRNA	+Dox, sc siRNA	-Dox, Dux siRNA	+Dox, Dux siRNA
		Replicate 1	Replicate 2	Replicate 3	Replicate 1	Replicate 2	Replicate 3	Replicate 1	Replicate 2	Replicate 3	Replicate 1	Replicate 2	Replicate 3	AVERAGE				STDV
e	Dux	0.94	2.49	0.4	1.31	1.15	1.99	0.38	0.59	1	1.62	0.5	0.51	1.27667	1.48333	0.656667	0.876667	1.08491	0.446019	0.315331	0.643765
f	Zscan4	0.87	2.56	0.44	1.1	0.72	1.91	0.36	0.55	0.9	1.73	0.49	0.63	1.29	1.24333	0.603333	0.95	1.12067	0.60781	0.273922	0.679117
g	MERVL	1.19	2.96	0.28	1.16	1.14	1.87	0.32	0.59	1.09	1.62	0.46	0.67	1.47667	1.39	0.666667	0.916667	1.3628	0.415812	0.390683	0.618088

## Sheet: Figure 4 supplementary 1
	Figure 4 supplementary 1
c	ETAA1-AAD
	Relative mRNA expression (normalized to GAPDH)
	Dox-iETAA1 ESCs
		-Dox, E14	+Dox, E14	-Dox, R1	+Dox, R1
	Replicate 1	1.06	42.77	0.76	31.54
	Replicate 2	0.99	42.77	0.87	30.68
	Replicate 3	0.95	40.18	0.75	29.43
	AVERAGE	1	41.9067	0.793333	30.55
	STDV	0.0556776	1.49534	0.0665833	1.06099
d	Dux
	Relative mRNA expression (normalized to GAPDH)
	Dox-iETAA1 ESCs
		-Dox, d1	+Dox, d1	-Dox, d2	+Dox, d2	-Dox, d3	+Dox, d3
	Replicate 1	0.96	1.87	0.82	2.23	0.47	2.04
	Replicate 2	1.05	2.06	0.71	2.21	0.5	1.75
	Replicate 3	0.99	1.89	0.56	2.42	0.52	2.2
	AVERAGE	1	1.94	0.696667	2.28667	0.496667	1.99667
	STDV	0.0458258	0.104403	0.130512	0.115902	0.0251661	0.228108
e	Zscan4
	Relative mRNA expression (normalized to GAPDH)
	Dox-iETAA1 ESCs
		-Dox, d1	+Dox, d1	-Dox, d2	+Dox, d2	-Dox, d3	+Dox, d3
	Replicate 1	1	1.25	1.07	1.91	0.51	1.56
	Replicate 2	0.94	1.4	1.02	2.01	0.49	1.42
	Replicate 3	1.07	1.43	1.03	2.01	0.5	1.43
	AVERAGE	1.00333	1.36	1.04	1.97667	0.5	1.47
	STDV	0.0650641	0.0964365	0.0264575	0.057735	0.01	0.0781025
f	MERVL
	Relative mRNA expression (normalized to GAPDH)
	Dox-iETAA1 ESCs
		-Dox, CNTL	+Dox, CNTL	-Dox, ATRi	+Dox, ATRi	-Dox, ATMi	+Dox, ATMi
	Replicate 1	1.11	1.78	0.68	0.99	0.87	1.61
	Replicate 2	0.88	2.01	0.57	1.1	0.9	1.51
	Replicate 3	1	1.79	0.63	1.14	0.86	2.02
	AVERAGE	0.996667	1.86	0.626667	1.07667	0.876667	1.71333
	STDV	0.115036	0.13	0.0550757	0.0776745	0.0208167	0.270247
		Relative mRNA expression (normalized to GAPDH)
		-Dox			+Dox			+Dox,CHK1i			-Dox	+Dox	+Dox,CHK1i	-Dox	+Dox	+Dox,CHK1i
		Replicate 1	Replicate 2	Replicate 3	Replicate 1	Replicate 2	Replicate 3	Replicate 1	Replicate 2	Replicate 3	AVERAGE			STDV
g	Zscan4	1.03	1.04	0.93	2.5	2.4	3.15	0	0	0	1	2.68333	0	0.0608276	0.407226	0
h	Dux	0.53	1.18	1.29	3.34	3.58	2.77	0.32	0.52	0.54	1	3.23	0.46	0.410731	0.416053	0.121655
	Relative mRNA expression (normalized to GAPDH)
		-Dox			+Dox			-Dox+ CHK1i			+Dox+ CHK1i			-Dox	+Dox	-Dox+ CHK1i	+Dox+ CHK1i	-Dox	+Dox	-Dox+ CHK1i	+Dox+ CHK1i
		Replicate 1	Replicate 2	Replicate 3	Replicate 1	Replicate 2	Replicate 3	Replicate 1	Replicate 2	Replicate 3	Replicate 1	Replicate 2	Replicate 3	AVERAGE				STDV
i	Zscan4	1.04	1.01	0.95	4.87	5	5.59	0.53	0.58	0.53	2.91	3.03	3.63	1	5.15333	0.546667	3.19	0.0458258	0.38371	0.0288675	0.385746
j	Dux	1.21	0.92	0.86	6.15	6.19	6.46	0.99	1.05	0.94	3.88	3.55	3.83	0.996667	6.26667	0.993333	3.75333	0.187172	0.168622	0.0550757	0.177858
k	Dux
	Relative mRNA expression (normalized to GAPDH)
		WT -Dox	WT +Dox	Dux KO -Dox	Dux KO +Dox
	Replicate 1	1.08	3.92	0.358	0.14
	Replicate 2	0.84	3.53	0.291	0.103
	Replicate 3	1.08	3.27	0.378	0.145
	AVERAGE	1	3.57333	0.342333	0.129333
	STDV	0.138564	0.327159	0.0455668	0.022942
l	Zscan4
	Relative mRNA expression (normalized to GAPDH)
		WT -Dox	WT +Dox	Dux KO -Dox	Dux KO +Dox
	Replicate 1	0.94	2.44	0.034	0.066
	Replicate 2	0.91	2.46	0.029	0.072
	Replicate 3	1.16	2.38	0.033	0.071
	AVERAGE	1.00333	2.42667	0.032	0.0696667
	STDV	0.136504	0.0416333	0.00264575	0.00321455
m	MERVL
	Relative mRNA expression (normalized to GAPDH)
		WT -Dox	WT +Dox	Dux KO -Dox	Dux KO +Dox
	Replicate 1	0.95	1.57	0.15	0.121
	Replicate 2	1.04	1.64	0.153	0.117
	Replicate 3	1.02	1.57	0.161	0.122
	AVERAGE	1.00333	1.59333	0.154667	0.12
	STDV	0.0472582	0.0404145	0.00568624	0.00264575

## Sheet: Figure 4 supplementary 2
	Figure 4 supplementary 2
a	ETAA1
	Relative mRNA expression (normalized to GAPDH)
		CNTL, sc siRNA	APH, sc siRNA	CNTL, ETAA1 siRNA
	Replicate 1	1.03	0.95	0.15
	Replicate 2	0.97	0.99	0.14
	Replicate 3	1	1	0.15
	AVERAGE	1	0.98	0.146667
	STDV	0.03	0.0264575	0.0057735
b	Dux
	Relative mRNA expression (normalized to GAPDH)
		CNTL, sc siRNA	APH, sc siRNA	CNTL, ETAA1 siRNA
	Replicate 1	0.69	11.69	1.87
	Replicate 2	0.94	12.62	1.68
	Replicate 3	1.37	10.54	1.52
	AVERAGE	1	11.6167	1.69
	STDV	0.343948	1.04194	0.175214
c								Western quantification
								GAPDH		p-CHK1			ZSCAN4
								Rel Density		Rel Density	Adj. Density		Rel Density	Adj. Density
							cnt, sc siRNA	1		1	1		1	1
							APH, sc siRNA	0.661578		13.3837	20.23		5.7237	8.65159
							cnt, ETAA1 siRNA	0.538233		1.01494	1.88568		3.60155	6.69143
e	Zscan4
	Relative mRNA expression (normalized to GAPDH)
	Dox-iETAA1 R1 ESCs
		-Dox, sc siRNA	+Dox, sc siRNA	-Dox, Dux siRNA	+Dox, Dux siRNA
	Replicate 1	0.94	2.44	0.43	1.22
	Replicate 2	0.91	2.46	0.39	0.94
	Replicate 3	1.16	2.38	0.4	0.94
	AVERAGE	1.00333	2.42667	0.406667	1.03333
	STDV	0.136504	0.0416333	0.0208167	0.161658
f	Dux
	Relative mRNA expression (normalized to GAPDH)
	Dox-iETAA1 E14 ESCs
		-Dox, sc siRNA	+Dox, sc siRNA	-Dox, Dux siRNA	+Dox, Dux siRNA
	Replicate 1	1.12	2.95	0.57	2.44
	Replicate 2	0.81	4.39	0.62	2.61
	Replicate 3	1.07	4.8	0.6	2.76
	AVERAGE	1	4.04667	0.596667	2.60333
	STDV	0.166433	0.971614	0.0251661	0.160104
g	Zscan4
	Relative mRNA expression (normalized to GAPDH)
	Dox-iETAA1 E14 ESCs
		-Dox, sc siRNA	+Dox, sc siRNA	-Dox, Dux siRNA	+Dox, Dux siRNA
	Replicate 1	1.01	1.91	0.32	0.74
	Replicate 2	0.86	1.67	0.27	0.73
	Replicate 3	1.13	1.72	0.31	0.72
	AVERAGE	1	1.76667	0.3	0.73
	STDV	0.135277	0.126623	0.0264575	0.01
h	Dux
	Relative mRNA expression (normalized to GAPDH)
	Dox-iETAA1 E14 ESCs
		-Dox, sc siRNA	+Dox, sc siRNA	-Dox, Dux siRNA	+Dox, Dux siRNA
	Replicate 1	1.12	2.95	0.57	2.44
	Replicate 2	0.81	4.39	0.62	2.61
	Replicate 3	1.07	4.8	0.6	2.76
	AVERAGE	1	4.04667	0.596667	2.60333
	STDV	0.166433	0.971614	0.0251661	0.160104
