# Supplementary material for: ATR expands embryonic stem cell fate potential in response to replication stress
Source: eLife. 2020 Mar 12;9:e54756. doi: 10.7554/eLife.54756 (PMC7067586; doi:10.7554/eLife.54756)
Supplement: Figure 5—source data 1. [file elife-54756-fig5-data1.xlsx]

## Sheet: Figure 5
	Figure 5
d	Dux
	Relative mRNA expression (normalized to TBP)
		-Dox	+Dox	+Dox, ATR siRNA	+Dox, ATRi
	Replicate 1	1	18.68	9.06	10.53
	Replicate 2	0.92	18.81	12.21	10.9
	Replicate 3	1.13	16.95	12.13	12.52
	AVERAGE	1.01667	18.1467	11.1333	11.3167
	STDV	0.105987	1.03838	1.796	1.05841
e	Luciferase
	Relative mRNA expression (normalized to TBP)
		-Dox	+Dox	+Dox, ATR siRNA	+Dox, ATRi
	Replicate 1	1	14.79	14.32	13.96
	Replicate 2	1.19	15.1	15.45	13.03
	Replicate 3	1.02	15.63	15.24	14.35
	AVERAGE	1.07	15.1733	15.0033	13.78
	STDV	0.104403	0.424774	0.601027	0.678159
f	Dux
	Relative mRNA expression (normalized to TBP)
		CNTL, sc siRNA	APH, sc siRNA	APH, GRSF1 siRNA	CNTL, GRSF1 siRNA
	Replicate 1	1	3.52	1.35	0.55
	Replicate 2	0.85	3.99	1.55	0.22
	Replicate 3	0.9	3.13	1.71	0.62
	AVERAGE	0.916667	3.54667	1.53667	0.463333
	STDV	0.0763763	0.43062	0.18037	0.21362
						Western blot quantification
g
						GAPDH		p-CHK1			ZSCAN4			GRSF1
						Rel Density		Rel Density	Adj. Density		Rel Density	Adj. Density		Rel Density	Adj. Density
					CNTL, sc siRNA	1		1	1		1	1		1	1
					APH, sc siRNA	0.964241		16.6978	17.3171		13.5502	14.0527		1.07007	1.10975
					CNTL, GRSF1 siRNA	0.726567		2.25048	3.09741		0.784209	1.07934		0.180532	0.248472
					APH, GRSF1 siRNA	0.669971		11.9595	17.8507		5.11966	7.6416		0.19762	0.294968
							Western blot quantification
h
							GAPDH		PCBP2			GRSF1
							Rel Density		Rel Density	Adj. Density		Rel Density	Adj. Density
						Lysate	1		1	1		1	1
						Elute	0.00315995		0.00258667	0.81858		0.148831	47.0991

## Sheet: Figure 5 supplementary 1
	Figure 5 supplementary 1
a	Exo-Dux
	Relative mRNA expression (normalized to GAPDH)
		-Dox, iDux DUX-KO	+Dox, iDux DUX-KO	+Dox, iDux DUX-KO, ATRi
	Replicate 1	1	29.38	18.94
	Replicate 2	1.22	27.41	14.25
	Replicate 3	1.38	35.42	18.55
	AVERAGE	1.2	30.7367	17.2467
	STDV	0.190788	4.17378	2.60251
b					Western blot quantification
					GAPDH		p-CHK1			ZSCAN4
					Rel Density		Rel Density	Adj. Density		Rel Density	Adj. Density
				DUX OE-DOX	1		1	1		1	1
				DUX OE + DOX	1.16085		0.899047	0.77447		19.5381	16.8308
	Dux
c	Relative mRNA expression (normalized to GAPDH)
		CNTL, sc siRNA	APH, sc siRNA	APH, Dux siRNA	APH, pcbp1 siRNA	APH, pcbp2 siRNA	APH, Hnrnpa1 siRNA	APH, Hnrnpa3 siRNA	APH, Grsf1 siRNA	APH, Pabpc1 siRNA	APH, Pabpn1 siRNA	APH, Hnrnpa2b1 siRNA
	Replicate 1	1	5.13	2.12	3.47	1.9	4.38	4.89	3.16	5.35	11.85	8.63
	Replicate 2	1.51	4.89	2.05	3.5	1.59	6.19	5.74	2.41	5.58	10.53	8.4
	Replicate 3	0.79	5.74	1.85	3.4	2.29	5.46	4.59	2.28	6.23	11.6	8.75
	AVERAGE	1.1	5.25333	2.00667	3.45667	1.92667	5.34333	5.07333	2.61667	5.72	11.3267	8.59333
	STDV	0.37027	0.438216	0.140119	0.051316	0.350761	0.910622	0.596518	0.475009	0.456399	0.701166	0.177858
