# Supplementary material for: ATR expands embryonic stem cell fate potential in response to replication stress
Source: eLife. 2020 Mar 12;9:e54756. doi: 10.7554/eLife.54756 (PMC7067586; doi:10.7554/eLife.54756)
Supplement: Figure 6—source data 1. [file elife-54756-fig6-data1.xlsx]

## Sheet: Figure 6
	Figure 6
b		% of Giant cells per field
		ATR +/+, UT	ATR +/+, APH	ATR sec/sec, UT	ATR sec/sec, APH
		25	2.7027	0	0
		0	0	0	0
		100	0	2.77778	0
		0	8.33333	0	0
		66.6667	100	0	0
		0	0	0	0
		0	0	0	0.793651
		0	0	1	2.77778
		0	5.88235	6.52174	0
		0	100	50	0
		0	0	0	0
		0	0	0	2.04082
		33.3333	0	100	0
		0	0	0	33.3333
		0	16.6667	1.51515	0
		0	50	0	0
		0	100	0	15.3846
		0	11.1111	0	0
		0	0	50	0
		0	0	1.17647	6.25
		2.5	20	18.1818	3.84615
		25	100	0	6.25
		0	3.7037	0	20
		0	9.09091	0	0
		13.6364	33.3333	0	25
		0	0	0	2.38095
		2.5641	0	0	0
		50	0	0	0
		0	0	100	0
		0	0	0	0
		0	12.5	0	25
		22.2222	0	0	4
		0	100	0	0
		0	0	25	3.84615
		0	33.3333	0	7.69231
		0	100	0	9.09091
		0	0	0	0
		50	0	0	0
		33.3333	0	0	0
		0	0	0	10.5263
		0	0	0	0
		0	1.92308	0	9.09091
		0	13.0435	0	0
		0	33.3333	2.43902	100
		3.125	3.84615	0	2.08333
		50	0	0	0
		0	0	0	0
		0	1.35135	3.77359	100
		100	0	100	16.6667
		0	0	0	0
		1.44928	0	0	0
		0	2.8169	33.3333	0
		0	100	0	0
		0	0	0	0
		16.6667	0	7.69231	0
		0	0	0	33.3333
		0	0	100	2.22222
		33.3333	0	0	0
		0	60	0	1.66667
		0	0	7.69231	0
		0	0	0	6.25
		0	0	0	0
		0	0	0	0
		0	0	0	0
		0	0	0	16.6667
		0	0	0	6.66667
		13.6364	0	0	100
		0	0	0	10
		0	10	0	3.57143
		0	0	0	0
		0	0	0	5.55556
		0	0	0	66.6667
		0	0	0	0
		50	0	0	50
		0	0	0	2.38095
		54.5455	100	0	0
		0	0	0	0
		0	100	0	2.12766
		0	18.1818	0	0
		0	25	0	11.7647
		0	0	0	0
		0	20	0	4.16667
		25	0	0	0
		0	0	0	0
		10	0	25	100
		2.5	100	0	0
		0	0	100	3.125
		0	100	0.645161	0
		0	30	0	3.26087
		0	66.6667	0	0
		0	0	0	0
		0	0	0	3.84615
		0	0	0	0
		0	0	0.561798	0
		0	0	0.943396	3.44828
		0	0	0	5
		0	7.14286	0	0
		0	0	0	0
		0	0	0	1.63934
		0	0	0	1.78571
		20	33.3333	10	0.884956
		50	0	1.40845	0
		0	0	0	8.10811
		50	0	0	1.26582
		0	0	0	20
		0	0	50	7.14286
		0	0	0	0
		0	0	0	33.3333
		0	1.47059	0	0
		0	1.17647	0	0
		40	6.25	0	0
		8.10811	6.66667	0	0
		0	50	4.25532	0
		0	0	0	100
		0	0	0	0
		0.909091	0.406504	0	0
		0	0	0	0.877193
		0	0	0	7.14286
		0	0	33.3333	5.88235
		1.75439	0	0	0
		0	0	0	4.34783
		0	50	0	4.54545
		57.1429	0	0	0
		1.75439	0	0	1.81818
		0	0	1.5625	28.5714
		0	16.6667	0	0
		2.85714	100	0	8
		0	0	0	0
		50	50	0	0
		0	0	0	0
		0	66.6667	0	0
		0	0	0	3.33333
		0	0	0	16.6667
		0	0	0	0
		0	0	0	7.69231
		0	25	0	2.1978
		0	0	0.787402	0
		0	100	0	0
		0	0	0	0
		0	0	0	1.40845
		0	25	0	0
		0	0	0	0
		0	28.5714	0	0.877193
		0	0	0	0
		0	0	0	0
		0	0	0	2.22222
		0	100	0	0
		25	40	0	0
		0	0	0	5
		0	66.6667	0	2.32558
		0	0	0	20
		0	100	0	0
		0	0	14.2857	0
		0	0	0	4.7619
		0	0	0	0
		0	0	0	9.09091
		0	100	0	1.5625
		0	19.0476	0	2.85714
		10	100	0	0
		0	0	0	6.66667
		0	100	0	20
		5.55556	0	0	2.94118
		27.2727	0	0	0
		0	20	0	14.2857
		100	100	0	0.877193
		0	0	0	0
		0	0	13.0435	33.3333
		0	50	0	8.33333
		0	50	0	3.84615
		0	0	50	0
		0	0	0	0
		0	100	0	5.26316
		0	0	0	0
		0	0	0	0
		41.6667	6.25	0	0
		7.14286	0	0	3.44828
		0	0	2.63158	10
		0	0	0	50
		7.14286	0	0	0
		0	100	1.63934	2.77778
		0	0	0	0
		1.36986	100	0	0
		0	0	0	0
		0	100	0	4.7619
		0	0	0	8
		15.3846	1.23457	0	7.14286
		0	50	0	6.89655
		0	0	0	0
		0	3.07692	4.25532	3.22581
		12	0	0	6.66667
		0	0	0	0
		50	0	0	0
		0	0	0	0
		0	0	0	23.0769
		0	0	0	11.1111
		0	0	0	0
		0	0	0	0
		0	0	2.5	0
		0	0	0	0
		0	0	0	0
		0	0	5.88235	25
		50	0	0	7.14286
		0	50	0	3.38983
		0		0	0
		0		0	0
		0		0	0
		0		100	0
		0		0	7.40741
		0		0	0
		0		0	0
		0		0	0
		0		1.17647	0
		0		3.22581	0
		0		0	8.33333
		0		0	40
		0		0	0
		0		0	0
		0		6.25	0
		0		0	2.27273
		40		0	0
				0	1.05263
				0	1.5625
				0	0
				8.33333	0
				0	2.12766
				0	0
				0	1.96078
				0	0
				0	1.88679
				0	0
				1.81818	0
				0	0
				100	0
				0	0
					1.78571
					0
					0
					10
					0
					0
					0
					10.5263
					0
					7.69231
					0
					0
					12.5
					25
					1.66667
					20
					33.3333
					6.52174
					0.877193
					0
					22.2222
					0
					50
					75
					50
					0
					0
					0
					1.13636
					0
					3.7037
					0
					0
	AVERAGE	6.63442	17.3273	4.93437	6.85345
d		Number of embryos with contribution to:			% of embryos with contribution to:
			-Dox	+Dox	-Dox	+Dox
		ICM	16	5	80	23.8095
		ICM + TE	4	16	20	76.1905
		Total	20	21	100	100
e	Round 1	Number of embryos with contribution to:
			-Dox	+Dox
		ICM	13	12
		ICM+TE/TE	3	8
	Round 2	Number of embryos with contribution to:
			-Dox	+Dox
		ICM	9	8
		ICM + TE/TE	1	4
	Round 1 & 2	Number of embryos with contribution to:			% of embryos with contribution to:
			-Dox	+Dox	-Dox	+Dox
		ICM	22	20	84.6154	62.5
		ICM+TE/TE	4	12	15.3846	37.5
		Total	26	32	100	100

## Sheet: Figure 6 supplementary 1
	Figure 6 supplementary 1
a		Prl2c2
		Relative mRNA expression (normalized to GAPDH)
			CNTL			APH			CNTL	APH	CNTL	APH
			Replicate 1	Replicate 2	Replicate 3	Replicate 1	Replicate 2	Replicate 3	AVERAGE		STDV
		ATR +/+	0.97	0.97	1.06	0.81	0.94	0.83	1	0.86	0.0519615	0.07
		ATR Sec/Sec	1.16	1.24	1.2	1.12	1.12	1.04	1.2	1.09333	0.04	0.046188
c		% of Giant cells per field (%)
		Dux WT	Dux WT +APH	Dux KO	Dux KO +APH
		3.18471	3.18471	2.63158	3.27869
		0.970874	0.970874	0	0
		0	0	6.25	2.63158
		5.12821	7.69231	4.65116	3.09278
		1.35135	0	0.609756	0
		1.94175	1.94175	14.2857	1.04167
		12.5	0	1.20482	0
		3.22581	3.22581	4.34783	2.38095
		0	20	0	3.125
		4.87805	4.87805	18.5185	4.16667
		9.30233	1.16279	4.31034	1.55039
		2.04082	12.2449	2.15827	2.83019
		0	8.57143	3.1746	0
		1.14942	3.44828	0	1.44928
		0	0	4.54545	1.92308
		7.69231	7.69231	0	0
		0	4.34783	3	0.763359
		4.7619	9.52381	0	0.862069
		2.5	5	0	9.43396
		1.14942	1.14942	15.3846	0
		1.21951	1.21951	3.84615	1.0929
		0	2.94118	0	1.69491
		0	11.5385	3.77359	0
		0	0	0	8
		0	0	0	0
		0	0	6.38298	18.0328
		2.63158	2.63158	1.48148	1.78571
		5.88235	0	33.9623	4.61538
		0	0	3.37079	8.92857
		1.78571	3.57143	15.1515	4.87805
		0	0	5.55556	0
		0	4	0	2.91262
		1.07527	0	0	0
		0	4.25532	4.46429	1.3245
		6.66667	20	3.33333	1.0989
		11.1111	0	0	12
		0	4.16667	7.69231	0
		0	25	5.26316	0.568182
		12.5	8.33333	0	1.40845
		0	0	0	0
		0	0	0	0
		0	5.88235	4.34783	1.96078
		0	0	0	0
		0	0	3.84615	1.36986
		3.0303	0	0.507614	5.55556
		0	0	0	2.67857
		25	12.5	4.25532	6.06061
		0.724638	0.724638	0.540541	0
		9.25926	0	0	0
		6.53595	0.653595	0	44.4444
		0	0	2.27273	2.3622
		2.12766	1.06383	5.33333	0
		2.12766	8.51064	0	0
		0	2.85714	3.84615	2.5974
		0	28.5714	1.38889	0
		0	5.88235	17.2414	1.85185
		1.21951	2.43902	11.1111	8.33333
		3.7037	11.1111	0	2.5641
		0	35.2941	0	0
		3.57143	10.7143	0	0
		3.0303	9.09091	0	0
		0	0	0	0.714286
		2.0202	0	1.49254	5.95238
		2	4	1.62602	0.746269
		1.2987	1.2987	0	1.28205
		1.5625	3.125	0	0
		0	0	7.01754	21.4286
		0	7.40741	0	0
		0	22.2222	0	0
		0	0	0.819672	0.952381
		0	8.19672	0	0
		14.0351	1.75439	3.44828	1.62602
		2.85714	1.42857	0	0
		6.66667	0	2.24719	2.94118
		0	0	0	6.25
		3.125	1.5625	0.862069	0
		0	1.35135	0	1.14942
		7.07071	1.0101	2.5	0
		2.35294	3.52941	1.92308	0
		8	14	0	21.7391
		0	83.3333	0	25
		1.0101	0.3367	0	1.85185
		2.85714	2.85714	0	0
		1.85185	1.85185	1.47059	0
		1.85185	5.55556	1.44928	0
		2.5974	0	8.21918	0
		0	1.94175	0	0.649351
		0	6.66667	1.78571	1.06383
		0	3.84615	0	0
		18.1818	0	0	7.95455
		5.55556	11.1111	0	0.60241
		16.6667	8.33333	0	1.0929
		3.77359	0	1.72414	1.34228
		13.8889	0	0	0
		0	0	0	0
		0	2.27273	16.6667	3.93701
		1.6129	0	0	0
		0	0	0	1.03093
		3.84615	0	5.51181	3.5461
		3.77359	5.66038	0	1.08108
		1.88679	3.77359	3.0303	5.88235
		1.0929	3.27869	0	0.775194
		2.5641	5.12821	0	0
		0	3.92157	8.4507	2.73224
		0	0	0	0
		0	0	1.38889	1.81818
		4.16667	4.16667	0	1.49254
		20	40	0	0
		0	0	2.35294	28.5714
		0	0	0	0
		20	20	0.961538	1.72414
		0	0	0	0.729927
		0	8.33333	0	0
		0	0	8.82353	0
		1.2987	2.5974	2.47525	1.07527
		5.26316	0	1.5873	1.42857
		8.51064	14.8936	1.85185	1.47059
		4.54545	0	6.38298	0
		0	1.81818	0	0
		2.15054	4.30107	0	0
		4.54545	0.757576	29.1667	9.52381
		4.82759	0.689655	0	2.20588
		6.25	50	0	0
		33.3333	50	0	0
		12.9032	12.9032	0	0
		0	66.6667	0	3.84615
		1.6129	0	0	0
		0	2.7027	0	1.63934
		0	9.25926	0	0
		1.07527	2.15054	0	0
		2.77778	2.77778	1.44928	0
		1.92308	1.92308	0	0
		0	8.10811	0	0.884956
		2.5641	1.28205	0	0.621118
		3.63636	2.72727	1.5748	0
		0	7.69231	2.10526	0
		2.5641	5.12821	0	0
		13.0435	0	0	0.540541
		0	0	1.11111	0
		4	12	0	0
		8.69565	4.34783	0	2.53165
		1.19048	0	0	0
		53.8462	0	0	0
		11.7647	2.94118	2.47934	4.85437
		2.47934	0.826446	1.33333	0
		0	5.55556	0	0
		0	6.25	0	0
		0	9.52381	0	0
		10.5263	15.7895	0	0
		0	23.0769	0	0
	Average	3.6565	6.26621	2.4622	2.49954
e		Round 1					Round 2
		-Dox		+Dox			-Dox		+Dox
		Embryo	TE	Embryo	TE		Embryo	TE	Embryo	TE
		1	1	1	2		1	0	1	0
		2	3	2	5		2	0	2	5
		3	2	3	4		3	4	3	2
		4	1	4	3		4	2	4	3
		5	1	5	2		5	1	5	4
		6	1	6	2		6	2	6	3
		7	2	7	3		7	2	7	6
		8	1	8	3		8	2	8	1
		9	2	9	4		9	2	9	4
		10	2	10	6		10	2	10	6
		11	1	11	2		11	1	11	1
		12	2	12	3		12	0	12	7
		13	0	13	1		13	1
		14	2	14	4		14	2
		15	0	15	2		15	1
		16	3	16	1
		17	0
		18	3
		19	2
	Average # cells contributing to TE		1.52632		2.9375			1.46667		3.5
f		Average number of cells contributing to TE			Average number of cells contributing to TE
		-Dox			+Dox
		Embryo	TE		Embryo	TE
		1	1		1	1
		2	1		2	1
		3	0		3	2
		4	1		4	0
		5	0		5	4
		6	0		6	0
		7	1		7	0
		8	0		8	1
		9	1		9	0
		10	3		10	1
		11	2		11	0
		12	0		12	0
		13	1		13	0
		14	1		14	0
		15	1		15	0
		16	1		16	0
		17	1		17	0
		18	0		18	1
		19	3		19	0
		20	0		20	0
		21	1		21	0
		22	0		22	1
		23	1		23	0
		24	1		24	0
		25	1		25	1
		26	0		26	2
		27	1		27	0
					28	0
	Average # cells contributing to TE		0.851852			0.535714
