# Supplementary material for: ATR expands embryonic stem cell fate potential in response to replication stress
Source: eLife. 2020 Mar 12;9:e54756. doi: 10.7554/eLife.54756 (PMC7067586; doi:10.7554/eLife.54756)
Supplement: Supplementary file 1. [file elife-54756-supp1.xlsx]

## Sheet: DS8_2c.4.cluster4.markers
Supplementary Table1. The list of genes that are differentially expressed between each cluster cells and the rest of the population.
	p_val	avg_logFC	pct.1	pct.2	p_val_adj
Zscan4a	5.82792e-205	2.91132	0.738	0.002	7.48189e-201
Gm5662	6.78521e-198	3.11184	0.833	0.007	8.71085e-194
Gm2016	9.08803e-195	3.20921	0.905	0.012	1.16672e-190
Gm20767	7.43976e-179	3.21751	0.738	0.006	9.55116e-175
Gm8300	2.77526e-178	3.66546	0.929	0.018	3.56288e-174
Gm2022	5.054e-163	3.34703	0.833	0.015	6.48833e-159
Usp17lb	1.94205e-152	2.72209	0.69	0.008	2.4932e-148
Zscan4d	2.94183e-148	2.57692	0.619	0.005	3.77671e-144
Gm21761	4.04342e-144	4.13315	0.952	0.032	5.19094e-140
Gm8994	1.67973e-139	3.26928	0.738	0.014	2.15643e-135
Gm5039	3.46035e-133	4.08061	0.833	0.024	4.44239e-129
Usp17lc	1.35142e-132	2.06237	0.5	0.002	1.73496e-128
Gm4971	3.14859e-132	2.08837	0.5	0.002	4.04216e-128
Zscan4c	3.52817e-131	2.15887	0.548	0.004	4.52946e-127
Mgll	9.5792e-127	1.99248	0.548	0.005	1.22978e-122
Tmem92	2.95525e-120	1.59514	0.476	0.003	3.79395e-116
Gm12794	1.99385e-118	2.21638	0.452	0.002	2.5597e-114
Gm6803	4.17763e-113	2.13422	0.452	0.003	5.36324e-109
Usp17le	6.47626e-113	1.82143	0.452	0.003	8.31422e-109
AF067061	4.16639e-106	2.38853	0.429	0.003	5.34881e-102
Inpp4b	1.31103e-101	1.48161	0.357	0.001	1.6831e-97
Fgf1	1.31103e-101	1.20266	0.357	0.001	1.6831e-97
Zscan4b	4.01649e-94	1.41172	0.31	0	5.15637e-90
Gm2027	5.71476e-90	1.94717	0.5	0.01	7.33661e-86
BC147527	5.73606e-87	1.85218	0.286	0	7.36395e-83
Gm13119	3.24567e-86	1.54777	0.405	0.005	4.1668e-82
Gm4027	3.49898e-85	1.71757	0.357	0.003	4.49199e-81
Usp17la	9.44006e-84	1.74613	0.381	0.004	1.21192e-79
Ubtfl1	2.8492e-81	1.42402	0.31	0.001	3.6578e-77
Zfp560	9.96757e-81	1.89148	0.452	0.01	1.27964e-76
Usp17ld	6.74179e-76	1.35378	0.31	0.002	8.65511e-72
Zfp516	6.56959e-74	1.97141	0.619	0.029	8.43403e-70
BC080695	2.09515e-67	1.71364	0.31	0.004	2.68975e-63
Arg2	1.30196e-66	1.44956	0.357	0.007	1.67146e-62
Limch1	1.01666e-62	1.51345	0.476	0.018	1.30519e-58
Scamp1	4.15684e-60	2.08661	0.571	0.032	5.33655e-56
P4ha2	1.01198e-54	1.61854	0.524	0.029	1.29919e-50
Arhgef26	1.42903e-51	1.63045	0.452	0.022	1.83459e-47
Spesp1	3.17579e-51	1.30768	0.286	0.006	4.07708e-47
Pdgfrl	1.17031e-49	1.43126	0.333	0.01	1.50244e-45
Tcstv3	3.45584e-49	1.80474	0.286	0.007	4.4366e-45
Ercc4	2.72984e-44	1.86377	0.619	0.06	3.50457e-40
Nelfa	2.24035e-37	2.6407	0.81	0.153	2.87616e-33
Prex2	1.45486e-32	1.78224	0.548	0.066	1.86774e-28
Csrnp3	2.5702e-32	1.13383	0.286	0.014	3.29962e-28
Glrx2	3.31727e-32	2.59195	0.881	0.248	4.25871e-28
Tsen2	2.0953e-31	1.76633	0.571	0.077	2.68995e-27
Fundc1	5.68e-29	1.69467	0.429	0.042	7.29199e-25
Sh3kbp1	2.23e-25	1.16388	0.31	0.024	2.86287e-21
Dst	3.81235e-25	2.12501	0.881	0.336	4.89429e-21
Cwc22	3.04583e-24	1.87488	0.69	0.161	3.91024e-20
Slc27a2	1.55626e-23	1.4235	0.381	0.043	1.99792e-19
Gm15455	6.04001e-23	1.27394	0.262	0.018	7.75417e-19
Il6ra	3.24744e-21	1.16372	0.357	0.04	4.16907e-17
Lonp2	2.37014e-20	1.67501	0.595	0.13	3.04279e-16
Os9	4.11496e-18	1.63328	0.452	0.081	5.28278e-14
Dnajb14	1.19631e-16	1.30476	0.262	0.028	1.53583e-12
C1d	1.17786e-15	1.86339	0.643	0.23	1.51213e-11
Ppig	1.70595e-14	1.51522	0.929	0.751	2.1901e-10
Prps1	1.77947e-14	1.30266	0.595	0.178	2.28448e-10
Cep57l1	2.31981e-14	1.46793	0.5	0.125	2.97817e-10
Rimklb	2.60353e-13	1.5953	0.405	0.09	3.34241e-09
Uap1	2.66731e-13	1.14235	0.333	0.059	3.42429e-09
Clp1	2.89552e-13	1.2808	0.5	0.131	3.71727e-09
Atf2	3.85695e-13	1.63868	0.571	0.18	4.95155e-09
Kif14	8.40308e-13	0.9562	0.31	0.051	1.07879e-08
Fbxo15	9.19365e-13	1.46926	0.786	0.405	1.18028e-08
Robo1	1.16877e-12	0.950641	0.262	0.037	1.50047e-08
Rbm25	7.89991e-12	0.834719	0.976	0.972	1.01419e-07
Cand1	2.34409e-11	1.34883	0.643	0.251	3.00935e-07
Cab39	2.7348e-11	1.28627	0.476	0.138	3.51094e-07
Ddit4l	3.05243e-11	1.53362	0.524	0.173	3.91871e-07
L1td1	4.6853e-11	-0.967501	0.619	0.92	6.01499e-07
Zswim6	8.00909e-11	0.944141	0.262	0.043	1.02821e-06
Pla2g16	8.07052e-11	0.801247	0.286	0.051	1.03609e-06
Ctr9	1.39663e-10	1.24634	0.69	0.351	1.793e-06
Babam2	2.27224e-09	0.589514	0.262	0.049	2.91711e-05
Mt1	8.54921e-09	-0.980246	0.571	0.882	0.000109755
Ythdc1	9.883e-09	0.734871	0.857	0.626	0.000126878
2810004N23Rik	1.2534e-08	0.990229	0.81	0.575	0.000160912
Dcbld1	1.5e-08	1.03305	0.31	0.077	0.00019257
Aqr	4.74457e-08	1.28284	0.524	0.223	0.000609109
Hnrnpd	1.22031e-07	-1.00979	0.333	0.704	0.00156663
Pnp	1.28115e-07	1.22063	0.381	0.125	0.00164474
Tomm6	2.0564e-07	-0.787269	0.571	0.807	0.00264
Gpbp1l1	2.10544e-07	1.07209	0.429	0.161	0.00270297
Sox2	2.23752e-07	-0.870587	0.381	0.793	0.00287252
Ccdc112	2.70618e-07	1.08349	0.357	0.111	0.00347419
Cbx1	6.98743e-07	-0.940571	0.31	0.671	0.00897047
Tdgf1	7.71256e-07	-0.99452	0.286	0.642	0.00990138
Dazl	9.40874e-07	0.888963	0.429	0.161	0.0120789
Zfp809	1.25642e-06	0.715339	0.381	0.13	0.0161299
Klhl13	1.26345e-06	0.742255	0.333	0.099	0.0162201
Prpf40a	1.68301e-06	0.744721	0.857	0.685	0.0216064
Zcchc17	1.93468e-06	0.877253	0.619	0.365	0.0248374
Rbm39	2.99818e-06	-0.704476	0.524	0.803	0.0384906
Iqgap1	3.81303e-06	0.940927	0.595	0.354	0.0489516
Nop58	3.81546e-06	-0.534596	0.762	0.938	0.0489829

## Sheet: DS8_2c.4.cluster3.markers
The list of genes that are differentially expressed between cluster 3 cells and the rest of the population.
	p_val	avg_logFC	pct.1	pct.2	p_val_adj
2410006H16Rik	8.0041e-47	1.16977	0.843	0.475	1.02757e-42
Dppa5a	2.42998e-43	-0.875762	0.687	0.921	3.11961e-39
Rps9	5.39796e-37	-0.553726	0.899	0.983	6.9299e-33
Hsp90b1	7.45269e-33	-0.947581	0.47	0.792	9.56776e-29
Ddit3	7.61597e-33	1.19089	0.327	0.064	9.77738e-29
Klf6	1.3907e-29	1.08486	0.447	0.141	1.78538e-25
Hsp90ab1	8.47285e-29	-0.339932	0.995	0.999	1.08774e-24
Malat1	9.39626e-29	0.774319	0.986	0.971	1.20629e-24
Pfn1	1.0044e-25	-0.516628	0.853	0.937	1.28945e-21
Hspa5	4.60573e-25	-0.805575	0.433	0.743	5.91284e-21
Ldha	8.09453e-25	-0.752655	0.47	0.761	1.03918e-20
Fabp3	2.60266e-24	1.15624	0.751	0.505	3.3413e-20
Anp32a	3.23316e-23	-0.670267	0.636	0.844	4.15073e-19
Atox1	1.11342e-22	-0.727243	0.479	0.751	1.42941e-18
Cdc14a	3.38807e-21	0.842329	0.253	0.058	4.3496e-17
Snrpd3	1.68182e-20	-0.587706	0.668	0.845	2.15912e-16
Ncl	1.94885e-20	-0.332395	0.991	0.997	2.50193e-16
Ndufa4	2.09423e-20	-0.514949	0.724	0.892	2.68857e-16
Mif	2.33357e-20	-0.585486	0.631	0.844	2.99584e-16
Aldoa	3.45125e-20	-0.678325	0.479	0.723	4.43071e-16
Igfbp2	4.11577e-19	-0.812141	0.235	0.558	5.28383e-15
Rps21	4.22632e-19	-0.459893	0.71	0.882	5.42575e-15
Ranbp1	5.15966e-19	-0.461221	0.793	0.906	6.62397e-15
Ankrd12	4.0766e-18	0.753759	0.378	0.144	5.23354e-14
Nop10	4.58343e-18	-0.718206	0.396	0.662	5.88421e-14
Rell1	5.67414e-18	0.740774	0.332	0.115	7.28445e-14
Mga	9.12762e-18	0.727179	0.544	0.282	1.1718e-13
Fnip1	6.77383e-17	0.652541	0.295	0.098	8.69625e-13
Cox5a	1.81117e-16	-0.423839	0.806	0.903	2.32518e-12
Rplp1	2.14072e-16	-0.339088	0.931	0.968	2.74825e-12
Dpy30	6.27977e-16	-0.661461	0.369	0.626	8.06197e-12
Ahnak	6.47726e-16	0.787311	0.447	0.212	8.3155e-12
Trp53inp1	6.67273e-16	0.708492	0.484	0.248	8.56646e-12
Atpif1	7.61147e-16	-0.45173	0.747	0.902	9.77161e-12
Prdx1	8.2417e-16	-0.366025	0.848	0.927	1.05807e-11
Ppa1	1.96782e-15	-0.74301	0.184	0.47	2.52629e-11
Hexa	3.23859e-15	0.798004	0.346	0.14	4.1577e-11
Rpl14	3.8306e-15	-0.321873	0.903	0.956	4.91773e-11
Tubb5	4.46406e-15	-0.407968	0.774	0.895	5.73096e-11
Nme2	5.06125e-15	-0.470946	0.687	0.816	6.49763e-11
Dctpp1	7.55163e-15	-0.688836	0.272	0.552	9.69478e-11
Uqcr11	1.32386e-14	-0.498412	0.641	0.781	1.69958e-10
Cox6c	1.35841e-14	-0.464514	0.664	0.81	1.74393e-10
Klf9	1.38858e-14	0.643198	0.654	0.439	1.78266e-10
Stmn2	1.3975e-14	-0.536062	0.447	0.697	1.79411e-10
Chchd2	2.54227e-14	-0.370236	0.82	0.919	3.26376e-10
Spp1	3.80752e-14	-0.477197	0.636	0.814	4.88809e-10
Nme1	6.46879e-14	-0.457263	0.636	0.803	8.30463e-10
Rplp0	6.61928e-14	-0.34527	0.843	0.928	8.49783e-10
Nhp2	6.77358e-14	-0.520408	0.59	0.766	8.69592e-10
Tdgf1	1.20961e-13	-0.506789	0.419	0.67	1.55289e-09
Spen	1.4799e-13	0.597494	0.447	0.226	1.89989e-09
Park7	1.50023e-13	-0.551702	0.47	0.69	1.92599e-09
Ifitm3	2.0204e-13	-0.619947	0.332	0.592	2.59379e-09
Eif4a2	2.05581e-13	0.552032	0.442	0.222	2.63924e-09
Sycp3	2.3948e-13	0.703247	0.41	0.203	3.07445e-09
Snrpd2	2.40711e-13	-0.587219	0.387	0.618	3.09025e-09
Elob	4.32454e-13	-0.416311	0.696	0.833	5.55185e-09
Psma7	4.42413e-13	-0.392579	0.76	0.86	5.6797e-09
Slc25a5	4.71159e-13	-0.547029	0.447	0.655	6.04873e-09
Stag1	7.12627e-13	0.620118	0.392	0.19	9.14871e-09
Rpl22	9.56472e-13	-0.313732	0.894	0.949	1.22792e-08
Rlim	9.59795e-13	0.62934	0.29	0.114	1.23219e-08
Atp5g1	1.10676e-12	-0.640308	0.281	0.529	1.42086e-08
Pdia3	1.23876e-12	-0.662123	0.3	0.541	1.59032e-08
Zfas1	1.73708e-12	0.63329	0.636	0.46	2.23006e-08
2010107E04Rik	2.07232e-12	-0.532255	0.465	0.657	2.66045e-08
Pafah1b1	2.17145e-12	0.487496	0.756	0.588	2.7877e-08
Atp6v1d	2.20175e-12	0.551848	0.618	0.411	2.82661e-08
Pkm	3.42058e-12	-0.432461	0.558	0.741	4.39134e-08
Txn1	4.27825e-12	-0.503061	0.544	0.729	5.49242e-08
Gsta4	4.51478e-12	-0.507012	0.493	0.708	5.79607e-08
Sdc4	6.2298e-12	0.587281	0.429	0.227	7.99781e-08
Tomm7	6.64676e-12	-0.448187	0.604	0.766	8.53311e-08
Jade1	9.70307e-12	0.525683	0.742	0.575	1.24568e-07
Erdr1	1.11589e-11	0.495712	0.687	0.499	1.43258e-07
Rpl37a	1.68728e-11	-0.393333	0.654	0.825	2.16613e-07
Atp5j2	1.74737e-11	-0.355914	0.737	0.842	2.24328e-07
Aqp3	2.03351e-11	0.820572	0.281	0.118	2.61062e-07
Cox6b1	2.70706e-11	-0.453536	0.608	0.756	3.47532e-07
Ndufa11	3.23904e-11	-0.385419	0.608	0.795	4.15828e-07
Lamp1	3.44331e-11	0.518354	0.677	0.492	4.42052e-07
Cnot8	5.20608e-11	0.595666	0.313	0.143	6.68356e-07
Sod1	5.6144e-11	-0.417557	0.691	0.809	7.20777e-07
Anp32b	7.51851e-11	-0.394638	0.742	0.877	9.65226e-07
Rpl37	8.10241e-11	-0.329406	0.843	0.914	1.04019e-06
Trh	8.25012e-11	-0.68752	0.161	0.383	1.05915e-06
Sec62	8.42976e-11	0.494938	0.747	0.595	1.08221e-06
S100a13	9.83119e-11	0.968418	0.318	0.152	1.26213e-06
Vezf1	1.0762e-10	0.435177	0.263	0.104	1.38162e-06
BC005561	1.07738e-10	0.53988	0.313	0.143	1.38314e-06
Pa2g4	1.27375e-10	-0.372708	0.714	0.845	1.63524e-06
Prdx2	1.28473e-10	-0.581024	0.221	0.444	1.64934e-06
Fkbp3	1.33985e-10	-0.28815	0.876	0.945	1.7201e-06
Washc2	1.38957e-10	0.526222	0.512	0.313	1.78394e-06
Wwc2	1.56408e-10	0.611092	0.346	0.172	2.00797e-06
Rplp2	1.66186e-10	-0.300893	0.839	0.923	2.13349e-06
Pdia6	1.74442e-10	-0.577964	0.24	0.471	2.23948e-06
Manf	1.76053e-10	-0.545379	0.272	0.488	2.26016e-06
Calm1	1.85549e-10	-0.302029	0.848	0.928	2.38207e-06
Hspd1	1.90954e-10	-0.392301	0.664	0.801	2.45147e-06
Chchd10	2.17721e-10	-0.33287	0.76	0.881	2.7951e-06
Ubn1	3.36222e-10	0.55065	0.309	0.146	4.31642e-06
Atg14	4.74269e-10	0.529086	0.452	0.262	6.08866e-06
Psmb3	4.93492e-10	-0.442755	0.535	0.702	6.33545e-06
Sgk1	5.8905e-10	-0.601167	0.12	0.33	7.56222e-06
Uqcrq	8.89173e-10	-0.40882	0.608	0.755	1.14152e-05
Snw1	1.29463e-09	0.297623	0.797	0.698	1.66205e-05
Atp5k	1.44733e-09	-0.392157	0.618	0.756	1.85808e-05
Cacybp	1.52139e-09	-0.397617	0.631	0.769	1.95316e-05
Srsf7	1.6393e-09	-0.421351	0.429	0.613	2.10454e-05
Tkt	1.67155e-09	-0.490284	0.203	0.416	2.14593e-05
Mdm2	1.7452e-09	0.634042	0.442	0.262	2.24049e-05
Rpl39	2.35799e-09	-0.387791	0.641	0.794	3.02718e-05
Parp1	2.44077e-09	-0.420971	0.419	0.623	3.13346e-05
Gas5	2.62432e-09	0.362847	0.816	0.72	3.36911e-05
Fem1b	2.71575e-09	0.471917	0.313	0.155	3.48648e-05
Tmsb10	3.09074e-09	-0.386726	0.502	0.689	3.96789e-05
Nolc1	3.76634e-09	-0.352582	0.719	0.829	4.83522e-05
Dbt	4.14401e-09	0.466188	0.286	0.133	5.32008e-05
Irak1bp1	4.40339e-09	0.48828	0.258	0.114	5.65308e-05
Tcof1	4.80269e-09	-0.456108	0.512	0.667	6.1657e-05
Ccnd1	5.00683e-09	-0.553711	0.212	0.414	6.42777e-05
Banf1	5.97042e-09	-0.405166	0.535	0.717	7.66482e-05
Fam25c	6.5648e-09	-0.47017	0.23	0.446	8.42789e-05
Mfsd1	6.73993e-09	0.511241	0.295	0.145	8.65272e-05
Crip1	6.82795e-09	-0.548981	0.129	0.328	8.76573e-05
Etnk1	6.9807e-09	0.459911	0.258	0.116	8.96183e-05
Gpx1	7.6084e-09	-0.267887	0.876	0.905	9.76766e-05
Bptf	8.11618e-09	0.4306	0.618	0.446	0.000104196
Marcksl1	8.25357e-09	-0.520617	0.235	0.427	0.000105959
Pla2g1b	8.70681e-09	-0.584559	0.157	0.349	0.000111778
Hspe1	9.78543e-09	-0.361028	0.631	0.769	0.000125625
Atp6v1c1	1.07287e-08	0.565047	0.364	0.205	0.000137736
Lig1	1.41411e-08	-0.369011	0.599	0.745	0.000181543
Cdkn1a	1.53203e-08	0.467717	0.65	0.459	0.000196682
Hmgn1	1.62804e-08	-0.27143	0.779	0.862	0.000209008
Calr	1.7691e-08	-0.383243	0.429	0.644	0.000227117
Kmt2c	1.81561e-08	0.440383	0.267	0.125	0.000233088
Hint1	1.86058e-08	-0.325372	0.714	0.805	0.000238861
Zfp428	1.88857e-08	-0.548433	0.207	0.393	0.000242455
Lyar	1.97205e-08	-0.384196	0.613	0.739	0.000253172
Pdia4	1.99076e-08	-0.566818	0.152	0.339	0.000255574
Plekha7	2.06921e-08	0.48426	0.341	0.181	0.000265645
Tpi1	2.53928e-08	-0.459644	0.249	0.449	0.000325993
Gtf2h1	2.65801e-08	0.545017	0.461	0.3	0.000341235
Dhx36	2.7607e-08	0.467864	0.548	0.389	0.000354419
Vps26a	2.86916e-08	0.441816	0.346	0.188	0.000368343
Rbm39	2.97412e-08	0.305071	0.853	0.784	0.000381817
Wnk1	3.20335e-08	0.39642	0.438	0.267	0.000411246
Sp1	3.30518e-08	0.44099	0.401	0.234	0.000424319
Cct3	3.62201e-08	-0.37578	0.553	0.699	0.000464994
Dnajc13	3.76573e-08	0.449098	0.359	0.2	0.000483445
Pcm1	3.95796e-08	0.403067	0.59	0.412	0.000508123
Tomm6	4.22859e-08	-0.332283	0.728	0.813	0.000542866
1700097N02Rik	4.48963e-08	-0.505485	0.166	0.359	0.000576379
Ndufa3	5.0396e-08	-0.429527	0.433	0.602	0.000646984
Hsp90aa1	5.49103e-08	0.298777	0.968	0.944	0.000704938
Mat2a	5.52186e-08	-0.459672	0.323	0.508	0.000708896
Tcea3	5.5294e-08	-0.412721	0.419	0.6	0.000709864
Taf3	5.53859e-08	0.505553	0.392	0.236	0.000711044
Tuba3a	6.04101e-08	-0.563767	0.088	0.256	0.000775545
Rcc2	6.05224e-08	-0.482093	0.341	0.518	0.000776986
Uqcr10	6.22879e-08	-0.295678	0.783	0.838	0.000799653
Vps35	6.61304e-08	0.395446	0.488	0.312	0.000848982
Ybx3	6.84573e-08	-0.425586	0.406	0.582	0.000878855
Tlk2	8.0091e-08	0.397604	0.465	0.283	0.00102821
Phf3	8.34969e-08	0.407475	0.622	0.467	0.00107193
Atp6v0b	8.37014e-08	0.420718	0.456	0.291	0.00107456
Atp6v0d1	8.53468e-08	0.505745	0.336	0.19	0.00109568
Pnisr	9.33133e-08	0.367642	0.668	0.536	0.00119796
Mier1	1.04969e-07	0.467635	0.369	0.216	0.0013476
Cenpm	1.05192e-07	-0.505356	0.323	0.507	0.00135045
Cox8a	1.0533e-07	-0.368232	0.654	0.777	0.00135223
Tuba1b	1.0604e-07	-0.345975	0.507	0.664	0.00136134
Cfl1	1.11742e-07	-0.389439	0.507	0.683	0.00143454
H2afx	1.15505e-07	-0.492727	0.226	0.42	0.00148285
Srsf3	1.35882e-07	-0.4508	0.332	0.506	0.00174446
Zfp638	1.41929e-07	0.497913	0.479	0.332	0.00182208
Aff4	1.47087e-07	0.499518	0.387	0.236	0.00188831
Cox7b	1.48231e-07	-0.398206	0.594	0.703	0.00190299
Snrpf	1.56931e-07	-0.442366	0.438	0.594	0.00201469
Ccne1	1.65703e-07	-0.494671	0.212	0.391	0.00212729
Ptma	1.72286e-07	-0.32691	0.668	0.772	0.00221181
B230219D22Rik	1.72414e-07	0.344295	0.359	0.203	0.00221345
Sub1	1.74182e-07	-0.251227	0.894	0.93	0.00223614
Eif5	1.75735e-07	0.313511	0.834	0.758	0.00225608
Aprt	1.80132e-07	-0.418294	0.281	0.461	0.00231253
Rpl39l	1.87923e-07	-0.431066	0.41	0.563	0.00241255
Plk2	1.94527e-07	0.584723	0.286	0.153	0.00249734
Dut	1.96253e-07	-0.417016	0.35	0.532	0.0025195
Top3b	2.03605e-07	0.47794	0.318	0.176	0.00261389
Timm13	2.15726e-07	-0.351649	0.433	0.624	0.0027695
Tbx3	2.44771e-07	0.427967	0.641	0.502	0.00314237
Atp5g3	2.53674e-07	-0.334642	0.539	0.686	0.00325667
Arid5b	2.67201e-07	0.403061	0.599	0.459	0.00343033
Nsrp1	2.77036e-07	0.338007	0.687	0.543	0.00355658
Rsrp1	3.16721e-07	0.413751	0.493	0.328	0.00406606
Fxr1	3.52697e-07	0.273191	0.816	0.711	0.00452792
Zc3h11a	3.69075e-07	0.431221	0.562	0.409	0.00473818
Pttg1	3.78478e-07	-0.478487	0.194	0.376	0.0048589
Sf3b5	3.94597e-07	-0.394666	0.323	0.503	0.00506584
Eef1d	3.96584e-07	-0.332235	0.539	0.668	0.00509134
Fam162a	4.77572e-07	-0.499454	0.272	0.437	0.00613107
Vcp	4.89974e-07	-0.382504	0.359	0.526	0.00629028
Gcsh	5.97834e-07	-0.481532	0.189	0.358	0.007675
Rexo2	7.65444e-07	-0.46316	0.272	0.445	0.00982677
Rpl41	7.76849e-07	-0.262903	0.7	0.827	0.00997318
Paics	8.10449e-07	-0.401406	0.442	0.586	0.0104045
Map4k4	8.87418e-07	0.407185	0.323	0.184	0.0113927
Eef1g	9.02584e-07	-0.30302	0.687	0.783	0.0115874
Zranb2	9.3283e-07	0.338263	0.728	0.645	0.0119757
Srek1	9.98245e-07	0.330647	0.41	0.254	0.0128155
2410015M20Rik	1.12052e-06	-0.443686	0.3	0.46	0.0143853
Rpl36al	1.15714e-06	-0.364756	0.488	0.617	0.0148554
Cox10	1.24052e-06	0.424493	0.253	0.132	0.0159258
Ankrd11	1.3022e-06	0.366039	0.687	0.598	0.0167176
Ociad1	1.31798e-06	0.33586	0.442	0.294	0.0169203
Cox7a2	1.47323e-06	-0.359392	0.562	0.69	0.0189134
Mdh2	1.71939e-06	-0.353661	0.406	0.565	0.0220736
Mrps12	1.74332e-06	-0.486188	0.194	0.354	0.0223808
Tra2b	1.84803e-06	0.4099	0.604	0.486	0.023725
Dynll1	1.95506e-06	-0.290136	0.733	0.819	0.025099
Smc4	1.96763e-06	0.294499	0.857	0.797	0.0252604
Mrps25	2.1104e-06	-0.411196	0.134	0.287	0.0270933
Dbi	2.1332e-06	-0.41853	0.304	0.464	0.027386
Suclg1	2.22725e-06	-0.387128	0.24	0.408	0.0285934
Sqstm1	2.23948e-06	0.35837	0.378	0.233	0.0287505
Ppib	2.25664e-06	-0.453956	0.281	0.442	0.0289707
Snx6	2.32581e-06	0.380508	0.433	0.278	0.0298588
Srsf6	2.40023e-06	-0.423054	0.309	0.472	0.0308141
Dtymk	2.43516e-06	-0.284766	0.535	0.693	0.0312626
Nap1l1	2.4663e-06	-0.351925	0.576	0.684	0.0316623
Fam50a	2.4968e-06	0.392719	0.535	0.392	0.0320539
Ube2c	2.87489e-06	-0.397999	0.267	0.44	0.0369078
Mrpl52	2.98959e-06	-0.366317	0.35	0.525	0.0383804
Ubb	3.13405e-06	0.25578	0.747	0.616	0.0402349
Son	3.53225e-06	0.281979	0.811	0.747	0.045347
Tnrc6c	3.73856e-06	0.407695	0.304	0.178	0.0479957
Tmsb4x	3.79544e-06	-0.374439	0.461	0.602	0.0487258

## Sheet: DS8_2c.4.cluster2.markers
The list of genes that are differentially expressed between cluster 2 cells and the rest of the population.
	p_val	avg_logFC	pct.1	pct.2	p_val_adj
Dppa5a	1.40022e-53	0.588407	0.931	0.853	1.79761e-49
Hnrnpu	5.65876e-47	-0.439275	0.938	0.981	7.26472e-43
Ncl	7.24763e-47	-0.35112	0.996	0.995	9.30451e-43
Cald1	2.6214e-44	0.858372	0.564	0.207	3.36535e-40
Malat1	2.06872e-31	-0.563452	0.96	0.983	2.65583e-27
Btg2	2.79995e-31	0.649608	0.402	0.128	3.59457e-27
Atox1	1.36021e-30	0.52031	0.807	0.642	1.74624e-26
Rif1	1.83112e-27	-0.542682	0.633	0.802	2.35079e-23
Cenpm	8.29789e-27	0.703821	0.617	0.383	1.06528e-22
Sfpq	2.07402e-26	-0.551214	0.58	0.764	2.66263e-22
Prrc2c	9.99915e-26	-0.463029	0.67	0.836	1.28369e-21
Rps11	8.22758e-25	0.45286	0.826	0.707	1.05626e-20
Crip2	1.20796e-24	0.553639	0.341	0.112	1.55078e-20
1700007K13Rik	7.37606e-24	0.559144	0.262	0.066	9.46939e-20
H1f0	8.30929e-24	-0.725771	0.058	0.267	1.06675e-19
Hspb1	1.73645e-22	0.497655	0.743	0.566	2.22925e-18
Nme2	5.22304e-22	0.385234	0.837	0.767	6.70534e-18
Hnrnpc	6.97715e-22	-0.381489	0.779	0.9	8.95726e-18
Wdr43	1.17484e-21	-0.495089	0.583	0.767	1.50826e-17
Cox8a	1.31451e-21	0.414225	0.826	0.711	1.68757e-17
Pmm1	2.81241e-21	0.516951	0.649	0.424	3.61057e-17
Cd81	1.92377e-20	0.475943	0.689	0.489	2.46974e-16
Abcb1b	1.31796e-19	0.521121	0.301	0.107	1.69199e-15
Nop58	4.03697e-18	-0.266745	0.905	0.952	5.18267e-14
Sdc4	6.03879e-18	0.488326	0.383	0.172	7.7526e-14
Anp32b	6.70884e-18	-0.35375	0.817	0.883	8.61281e-14
Nusap1	1.15166e-17	-0.719742	0.26	0.44	1.4785e-13
Cacybp	5.85479e-17	-0.375162	0.689	0.788	7.51638e-13
L1td1	7.19737e-17	-0.319852	0.886	0.929	9.23998e-13
Sparc	1.47004e-16	0.514151	0.54	0.341	1.88724e-12
Nars	2.04817e-16	-0.393854	0.633	0.775	2.62943e-12
Cenpe	3.50225e-16	-0.61944	0.362	0.52	4.49619e-12
Siva1	8.85141e-16	0.454732	0.592	0.406	1.13634e-11
Ccng1	1.1946e-15	0.392709	0.617	0.388	1.53363e-11
Dhx16	1.36279e-15	0.411384	0.703	0.533	1.74954e-11
Ddit4	1.49363e-15	0.493258	0.309	0.131	1.91752e-11
Rpl18a	2.28507e-15	0.450783	0.489	0.275	2.93358e-11
Ifitm3	2.82092e-15	0.430714	0.654	0.482	3.6215e-11
Dek	3.77169e-15	-0.27984	0.884	0.928	4.84209e-11
Cox6b2	5.7894e-15	0.413442	0.316	0.139	7.43244e-11
Anp32a	6.98867e-15	-0.371089	0.768	0.842	8.97206e-11
Cdkn1a	7.65689e-15	0.444444	0.599	0.412	9.82991e-11
Hnrnpm	1.04232e-14	-0.277	0.844	0.911	1.33813e-10
Rbm39	2.08377e-14	-0.363179	0.743	0.83	2.67514e-10
Gnl3	1.55909e-13	-0.311893	0.721	0.825	2.00156e-09
Ddit4l	2.61374e-13	0.303421	0.279	0.118	3.35551e-09
Dnajc9	4.31317e-13	0.416583	0.596	0.411	5.53725e-09
Smc3	5.29394e-13	-0.309665	0.687	0.795	6.79636e-09
Fbxw7	1.43517e-12	0.47855	0.323	0.164	1.84247e-08
Ehd4	2.05676e-12	0.318143	0.278	0.124	2.64046e-08
Ercc5	4.16858e-12	0.36509	0.253	0.108	5.35162e-08
Mdm2	5.06521e-12	0.366501	0.394	0.219	6.50272e-08
Ywhae	5.66353e-12	-0.296789	0.724	0.804	7.27084e-08
Palm3	6.00517e-12	0.493797	0.351	0.192	7.70944e-08
Trim28	1.01023e-11	-0.298326	0.749	0.843	1.29693e-07
Dbi	1.01587e-11	0.400202	0.54	0.37	1.30418e-07
Hnrnpd	1.26369e-11	-0.311524	0.649	0.723	1.62232e-07
Pdap1	1.27504e-11	-0.257209	0.824	0.884	1.6369e-07
Tagln2	1.58729e-11	0.389255	0.308	0.154	2.03777e-07
Cenpf	1.93263e-11	-0.564925	0.392	0.508	2.48111e-07
Cyb5r3	2.2782e-11	0.411222	0.499	0.336	2.92475e-07
1810037I17Rik	3.4081e-11	0.397994	0.54	0.383	4.37532e-07
Fxr1	3.9481e-11	-0.317841	0.673	0.764	5.06857e-07
Ccne1	4.40431e-11	0.448857	0.459	0.298	5.65425e-07
H2afx	7.52659e-11	-0.498788	0.311	0.443	9.66263e-07
Phlda3	1.02659e-10	0.315011	0.336	0.176	1.31794e-06
Ndufb9	1.53406e-10	0.330846	0.712	0.592	1.96943e-06
Fth1	1.56521e-10	0.25661	0.852	0.788	2.00942e-06
Kif20b	1.85717e-10	-0.419886	0.489	0.601	2.38423e-06
Sars	1.93451e-10	-0.402155	0.374	0.513	2.48352e-06
Khdc3	2.0312e-10	0.381905	0.255	0.12	2.60766e-06
Lyar	2.36172e-10	-0.307363	0.661	0.76	3.03198e-06
Lage3	3.42598e-10	0.360428	0.402	0.247	4.39827e-06
Hacd2	3.71244e-10	0.368684	0.427	0.27	4.76603e-06
Fam162a	4.6407e-10	0.411165	0.506	0.347	5.95772e-06
Pycr2	5.8957e-10	0.376684	0.257	0.125	7.5689e-06
Ptrh2	6.5748e-10	0.347228	0.293	0.153	8.44073e-06
Vkorc1	6.65181e-10	0.376698	0.272	0.139	8.53959e-06
Sac3d1	7.56472e-10	0.279034	0.264	0.127	9.71159e-06
Laptm5	8.55478e-10	0.368714	0.425	0.263	1.09826e-05
Matr3	8.97822e-10	-0.3089	0.554	0.672	1.15262e-05
Cct6a	1.44398e-09	-0.257367	0.814	0.867	1.85378e-05
Rps7	1.65054e-09	0.313512	0.385	0.229	2.11897e-05
Palld	1.91712e-09	0.301502	0.272	0.139	2.4612e-05
Meg3	2.08209e-09	0.426316	0.583	0.458	2.67298e-05
Eno1	2.21352e-09	0.339448	0.55	0.407	2.84172e-05
Rpl7	2.74452e-09	0.353703	0.453	0.295	3.52341e-05
Uba52	3.35385e-09	0.323915	0.267	0.139	4.30568e-05
Trp53inp1	3.86372e-09	0.293225	0.378	0.22	4.96025e-05
Capns1	4.4117e-09	0.318696	0.483	0.33	5.66374e-05
Rpl7l1	4.52089e-09	-0.324581	0.42	0.54	5.80392e-05
Rrm2	4.86608e-09	0.309945	0.492	0.336	6.24708e-05
Mki67	5.90229e-09	-0.534363	0.315	0.425	7.57736e-05
Abracl	8.36578e-09	0.332161	0.271	0.145	0.0001074
Avpi1	9.96535e-09	0.279115	0.492	0.335	0.000127935
Rps8	1.38717e-08	-0.264938	0.759	0.824	0.000178085
Prpf4b	1.42585e-08	-0.335196	0.359	0.483	0.00018305
Haus2	1.77548e-08	0.253104	0.293	0.161	0.000227936
Set	1.93872e-08	-0.269977	0.722	0.8	0.000248893
Rrm1	2.30677e-08	0.354674	0.385	0.241	0.000296143
Atrx	2.8981e-08	-0.259112	0.707	0.81	0.000372057
Tpx2	2.90053e-08	-0.41015	0.36	0.463	0.00037237
Pclaf	3.0922e-08	0.295786	0.267	0.145	0.000396976
Marcksl1	3.15491e-08	0.343248	0.476	0.343	0.000405027
Utp3	3.27767e-08	-0.272953	0.606	0.694	0.000420787
Tex19.1	3.44737e-08	0.357671	0.413	0.276	0.000442573
Wbp11	3.48604e-08	-0.278682	0.568	0.658	0.000447538
Upf3b	3.64208e-08	0.314582	0.515	0.363	0.00046757
Hmmr	3.80761e-08	-0.394771	0.408	0.504	0.00048882
Pdia3	3.87142e-08	0.319781	0.58	0.451	0.000497014
Clic1	4.4618e-08	0.2776	0.264	0.142	0.000572806
Cnih4	4.9106e-08	0.305135	0.394	0.249	0.000630423
Spr	5.05176e-08	0.375552	0.304	0.181	0.000648545
Suz12	5.06055e-08	-0.360854	0.385	0.498	0.000649673
Syncrip	5.35307e-08	-0.329596	0.492	0.59	0.000687227
Trh	5.43225e-08	0.371146	0.427	0.295	0.000697393
S100a10	5.53526e-08	0.295272	0.297	0.173	0.000710616
Tcerg1	6.46951e-08	-0.32407	0.538	0.641	0.000830555
Rnf7	7.66392e-08	0.316469	0.548	0.422	0.000983894
Ktn1	8.20712e-08	-0.289734	0.652	0.727	0.00105363
Nme4	8.45277e-08	0.311126	0.325	0.194	0.00108517
Hspa4	9.16809e-08	-0.25414	0.656	0.742	0.001177
Sgo2a	9.76612e-08	-0.388748	0.237	0.355	0.00125377
Pdia6	1.02564e-07	0.33915	0.511	0.383	0.00131672
Crip1	1.07257e-07	0.358545	0.373	0.246	0.00137697
Elovl6	1.11366e-07	0.343151	0.346	0.22	0.00142971
Syf2	1.16333e-07	-0.306722	0.387	0.505	0.00149349
Gtpbp4	1.36322e-07	-0.254761	0.649	0.737	0.0017501
Ubr5	1.38359e-07	-0.298281	0.42	0.522	0.00177625
Mcm3ap	1.45529e-07	0.275803	0.286	0.165	0.00186831
Gpn3	1.70829e-07	0.370211	0.311	0.192	0.0021931
Zfp292	1.77668e-07	-0.370799	0.29	0.404	0.0022809
Snrnp27	1.97102e-07	-0.37873	0.378	0.478	0.0025304
AA465934	2.21457e-07	0.278753	0.286	0.169	0.00284306
Cyb5b	2.2508e-07	0.255973	0.274	0.155	0.00288957
Top2a	2.29468e-07	-0.319003	0.717	0.758	0.00294591
Tmsb10	2.44571e-07	0.280911	0.712	0.624	0.00313981
Jund	2.48342e-07	0.289495	0.301	0.178	0.00318821
Dnajc7	2.50366e-07	-0.310934	0.466	0.567	0.0032142
Prrc1	2.62066e-07	0.331475	0.45	0.325	0.0033644
Aprt	3.13533e-07	0.298393	0.515	0.377	0.00402514
Erp29	3.21802e-07	0.313137	0.387	0.257	0.00413129
Tma7	3.73438e-07	0.277485	0.267	0.154	0.0047942
Polr2f	3.79249e-07	0.286729	0.598	0.481	0.00486879
Ubtf	3.98787e-07	-0.279908	0.446	0.552	0.00511962
Ubxn2a	4.16446e-07	-0.260883	0.543	0.641	0.00534634
Cndp2	4.45321e-07	0.303152	0.257	0.147	0.00571703
Fam111a	6.85017e-07	0.262976	0.279	0.164	0.00879425
Csnk1a1	6.91208e-07	-0.296217	0.534	0.624	0.00887373
Tars	1.04701e-06	-0.339914	0.327	0.427	0.0134415
Thoc6	1.12778e-06	0.297602	0.318	0.199	0.0144784
Ubb	1.62812e-06	0.250523	0.685	0.602	0.0209018
Kcnq1ot1	1.88819e-06	-0.342222	0.301	0.407	0.0242406
Dnm1l	2.45592e-06	-0.287201	0.418	0.514	0.0315291
Scaf11	2.53377e-06	-0.318421	0.443	0.53	0.0325286
Zc3h13	2.93165e-06	-0.273078	0.545	0.633	0.0376365
Gtf2f1	4.00369e-06	0.284856	0.661	0.552	0.0513993
Tuba3a	5.46715e-06	0.272102	0.293	0.187	0.0701873
Tra2b	5.77177e-06	-0.270701	0.455	0.539	0.074098
Selenow	6.22793e-06	-0.289797	0.344	0.44	0.0799541
Bptf	8.30234e-06	-0.29064	0.418	0.51	0.106585
Gpbp1	8.3795e-06	-0.288695	0.299	0.393	0.107576
Ccnd1	8.82957e-06	0.250647	0.453	0.334	0.113354
Ptms	9.12734e-06	-0.341743	0.271	0.363	0.117177
Cox14	9.44042e-06	0.26379	0.293	0.192	0.121196
Yme1l1	1.00099e-05	-0.299864	0.422	0.501	0.128507
Pcm1	1.41249e-05	-0.259656	0.38	0.481	0.181336
Pgp	1.7353e-05	0.257947	0.38	0.27	0.222777
Fblim1	1.9655e-05	-0.296896	0.371	0.459	0.252331
Mrpl47	2.30419e-05	-0.264316	0.45	0.527	0.295812
Gadd45gip1	2.38943e-05	-0.302694	0.348	0.427	0.306755
Tuba4a	2.86501e-05	0.254949	0.462	0.352	0.36781
Pfdn4	2.98868e-05	-0.272442	0.413	0.49	0.383687
Cdc20	3.25597e-05	-0.329237	0.353	0.422	0.418001
Pop5	3.32242e-05	0.270601	0.339	0.237	0.426532
Wdr76	3.50311e-05	0.257301	0.258	0.165	0.449729
Anp32e	3.56462e-05	-0.276365	0.404	0.489	0.457625
Btf3	3.88555e-05	0.266688	0.318	0.218	0.498827

## Sheet: DS8_2c.4.cluster1.markers
The list of genes that are differentially expressed between cluster 1 cells and the rest of the population.
	p_val	avg_logFC	pct.1	pct.2	p_val_adj
Ncl	4.34232e-103	0.495208	0.998	0.994	5.57468e-99
Anp32a	2.86307e-60	0.674049	0.942	0.722	3.67561e-56
Hnrnpu	8.64789e-53	0.42738	0.993	0.943	1.11022e-48
Cald1	3.51842e-49	-1.08315	0.131	0.505	4.51695e-45
L1td1	1.2857e-48	0.493997	0.979	0.865	1.65058e-44
Anp32b	1.00121e-47	0.548538	0.947	0.793	1.28536e-43
Sdc4	2.30577e-42	-1.06926	0.068	0.389	2.96015e-38
Btg2	2.7411e-37	-0.940828	0.065	0.36	3.51902e-33
Cacybp	1.04702e-35	0.525372	0.848	0.679	1.34416e-31
Hnrnpc	2.54249e-35	0.46119	0.928	0.797	3.26405e-31
Rpl14	1.07869e-33	0.328018	0.986	0.921	1.38482e-29
Sfpq	1.697e-33	0.562922	0.813	0.604	2.17861e-29
Trp53inp1	1.45215e-32	-0.900104	0.116	0.401	1.86427e-28
Pfn1	3.44274e-32	0.362181	0.965	0.895	4.41978e-28
Ccng1	5.04582e-30	-0.749948	0.31	0.599	6.47782e-26
Actb	1.14606e-29	0.27524	1	0.988	1.47131e-25
Ddit4l	3.15025e-29	-0.895545	0.044	0.28	4.04429e-25
Rpl37	5.82897e-29	0.373367	0.947	0.872	7.48324e-25
Rpl22	2.20034e-28	0.315664	0.975	0.917	2.82479e-24
Mdm2	2.28541e-28	-0.883881	0.133	0.399	2.934e-24
Cdkn1a	2.83825e-28	-0.786105	0.331	0.597	3.64374e-24
Fabp3	8.71414e-28	-0.931252	0.398	0.644	1.11872e-23
Crip2	3.1241e-27	-0.729001	0.065	0.302	4.01072e-23
Lyar	3.48133e-27	0.481483	0.828	0.645	4.46934e-23
Pdap1	1.06987e-26	0.375177	0.93	0.812	1.3735e-22
Nars	2.37412e-26	0.481175	0.82	0.646	3.04789e-22
Trim28	6.29225e-26	0.412658	0.884	0.75	8.07799e-22
H2afx	6.69422e-26	0.682345	0.531	0.292	8.59403e-22
Ddit4	9.96691e-26	-0.874437	0.07	0.296	1.27955e-21
Rpl18a	6.06807e-25	-0.684981	0.205	0.47	7.79019e-21
Cct6a	5.12404e-24	0.383682	0.914	0.798	6.57824e-20
Snrpd3	5.48668e-24	0.37833	0.895	0.764	7.0438e-20
Hnrnpd	3.37116e-23	0.459727	0.769	0.64	4.3279e-19
Rpl39	6.85385e-23	0.404777	0.849	0.715	8.79897e-19
Sub1	2.21595e-22	0.312184	0.975	0.889	2.84484e-18
Set	2.9533e-22	0.418675	0.849	0.713	3.79144e-18
Mif	6.62785e-22	0.369661	0.89	0.757	8.50884e-18
Nusap1	1.71644e-21	0.64423	0.492	0.28	2.20356e-17
Cd81	4.38707e-21	-0.532502	0.447	0.656	5.63212e-17
Hsp90aa1	5.92741e-21	-0.337932	0.944	0.95	7.60961e-17
Hsp90b1	6.91565e-21	0.37883	0.842	0.673	8.87831e-17
Plk2	9.6272e-21	-0.64562	0.06	0.252	1.23594e-16
Rps11	2.08559e-20	-0.435923	0.702	0.792	2.67748e-16
Fkbp3	3.03177e-20	0.268488	0.967	0.912	3.89218e-16
Hmgn1	5.68133e-20	0.327457	0.904	0.812	7.29369e-16
Pmm1	8.21649e-20	-0.568142	0.389	0.603	1.05483e-15
Cenpf	9.18465e-20	0.495392	0.58	0.379	1.17912e-15
Elob	2.41082e-19	0.333991	0.886	0.761	3.09501e-15
Nop58	2.77405e-19	0.253559	0.967	0.909	3.56132e-15
Rpl13	4.86273e-19	0.300962	0.895	0.784	6.24277e-15
Cbx1	7.78805e-19	0.411316	0.755	0.595	9.9983e-15
Gnl3	1.08095e-18	0.351123	0.87	0.722	1.38773e-14
Rcc2	1.1914e-18	0.518704	0.602	0.413	1.52952e-14
Abcb1b	1.78613e-18	-0.565226	0.075	0.262	2.29304e-14
H1f0	1.95724e-18	0.581891	0.289	0.109	2.5127e-14
Atg14	2.69137e-18	-0.61795	0.166	0.378	3.45519e-14
Phlda3	2.78569e-18	-0.618366	0.121	0.324	3.57627e-14
Atp5k	9.98657e-17	0.352259	0.814	0.68	1.28208e-12
1700097N02Rik	2.01214e-16	0.53978	0.434	0.256	2.58318e-12
Dhx16	3.26004e-16	-0.47881	0.506	0.668	4.18524e-12
Ywhae	3.4596e-16	0.326301	0.837	0.726	4.44144e-12
Avpi1	5.26961e-16	-0.563765	0.282	0.479	6.76513e-12
Ldha	5.75678e-16	0.357276	0.804	0.656	7.39056e-12
Wdr43	8.66714e-16	0.39203	0.79	0.626	1.11269e-11
Sqstm1	9.46119e-16	-0.611054	0.147	0.33	1.21463e-11
Fbxw7	9.6159e-16	-0.561001	0.121	0.303	1.23449e-11
Nop10	1.31291e-15	0.396374	0.713	0.557	1.68552e-11
Rps8	1.74368e-15	0.339616	0.884	0.738	2.23853e-11
Ehd4	2.4507e-15	-0.466423	0.088	0.255	3.1462e-11
Stmn2	2.70377e-15	0.357881	0.758	0.589	3.4711e-11
Snrpf	4.60956e-15	0.401386	0.662	0.506	5.91776e-11
Ubb	5.34586e-15	-0.425169	0.552	0.694	6.86302e-11
Lsm4	1.1438e-14	0.385328	0.69	0.557	1.46841e-10
Eef1g	1.95893e-14	0.299254	0.837	0.721	2.51488e-10
Tomm6	2.75985e-14	0.265738	0.872	0.75	3.54309e-10
Top2a	4.41713e-14	0.342842	0.809	0.694	5.67071e-10
Rif1	4.48658e-14	0.280103	0.813	0.679	5.75987e-10
Rpl36al	6.36071e-14	0.358563	0.688	0.534	8.16587e-10
Lmnb1	6.93201e-14	0.432205	0.529	0.362	8.89932e-10
Rbm8a	7.0908e-14	0.27287	0.83	0.687	9.10316e-10
Dnajc9	1.15942e-13	-0.522486	0.382	0.558	1.48846e-09
Atp5e	1.6541e-13	0.335555	0.743	0.593	2.12353e-09
Clic1	2.74795e-13	-0.433101	0.098	0.256	3.52782e-09
Tpx2	4.15129e-13	0.454902	0.508	0.361	5.32942e-09
Tet1	5.78295e-13	0.342233	0.658	0.494	7.42416e-09
Hnrnpm	7.3653e-13	0.253145	0.926	0.854	9.45557e-09
Hspa4	8.76567e-13	0.317295	0.783	0.655	1.12534e-08
Ndufs6	9.04644e-13	0.313741	0.776	0.667	1.16138e-08
Gpn3	1.24384e-12	-0.534145	0.145	0.306	1.59684e-08
Fblim1	1.33191e-12	0.400471	0.524	0.354	1.70991e-08
Pttg1	1.49084e-12	0.486698	0.445	0.281	1.91394e-08
Hk2	1.81064e-12	0.379738	0.538	0.393	2.3245e-08
2410006H16Rik	1.82332e-12	-0.667501	0.445	0.592	2.34077e-08
Matr3	1.9316e-12	0.335107	0.709	0.565	2.47979e-08
Tcea3	2.54598e-12	0.350386	0.671	0.504	3.26852e-08
Prrc2c	2.60653e-12	0.252539	0.837	0.721	3.34627e-08
Sars	2.76281e-12	0.410229	0.545	0.396	3.54689e-08
Tomm7	3.78896e-12	0.301385	0.811	0.692	4.86427e-08
Jund	6.01016e-12	-0.506879	0.137	0.291	7.71584e-08
Mcm3ap	9.09377e-12	-0.445428	0.126	0.275	1.16746e-07
Ssb	1.07382e-11	0.253964	0.911	0.797	1.37858e-07
Eif4e2	1.07803e-11	0.371769	0.622	0.502	1.38398e-07
Hnrnpab	1.3891e-11	0.274826	0.841	0.731	1.78332e-07
Bloc1s2	2.05525e-11	-0.384972	0.163	0.326	2.63852e-07
Banf1	2.15148e-11	0.277185	0.778	0.628	2.76207e-07
Park7	2.61566e-11	0.296155	0.723	0.609	3.35798e-07
Srsf2	2.66499e-11	0.33519	0.588	0.443	3.42131e-07
Cfl1	2.74867e-11	0.34783	0.718	0.612	3.52874e-07
Ktn1	3.95702e-11	0.301459	0.764	0.65	5.08002e-07
Cenpm	4.63809e-11	-0.514099	0.403	0.53	5.95438e-07
Sptbn1	4.67316e-11	-0.393635	0.257	0.431	5.99941e-07
Ran	5.09858e-11	0.290905	0.743	0.616	6.54555e-07
Snhg5	5.80955e-11	0.375923	0.553	0.414	7.4583e-07
Eif1ax	6.29967e-11	0.389406	0.49	0.343	8.08752e-07
Washc2	8.70998e-11	-0.399662	0.243	0.413	1.11819e-06
Gadd45gip1	9.67781e-11	0.385961	0.482	0.335	1.24244e-06
Upp1	1.06494e-10	0.304848	0.716	0.587	1.36717e-06
Tars	1.10718e-10	0.410166	0.466	0.331	1.4214e-06
Hint1	1.70425e-10	0.251952	0.842	0.756	2.18792e-06
Anp32e	2.1899e-10	0.3771	0.538	0.397	2.81139e-06
Hspb1	2.24376e-10	-0.385775	0.585	0.675	2.88053e-06
Ndufb9	3.27505e-10	-0.358536	0.567	0.691	4.2045e-06
Uqcrq	3.50047e-10	0.279419	0.802	0.685	4.4939e-06
Map1lc3b	3.78679e-10	-0.409792	0.229	0.393	4.86148e-06
Sycp3	3.83389e-10	-0.497222	0.151	0.293	4.92195e-06
Hypk	5.06408e-10	0.25822	0.844	0.745	6.50127e-06
Tdgf1	7.61568e-10	0.261256	0.72	0.57	9.77701e-06
Siva1	1.05334e-09	-0.40536	0.401	0.537	1.35227e-05
Dpy30	1.11257e-09	0.31262	0.66	0.535	1.42832e-05
Syncrip	1.13499e-09	0.340284	0.625	0.499	1.45709e-05
Srsf3	1.38603e-09	0.33833	0.553	0.428	1.77938e-05
Ube2k	1.39672e-09	0.29047	0.723	0.635	1.7931e-05
Eed	1.40924e-09	0.330873	0.639	0.514	1.80918e-05
Rpl7	1.49031e-09	-0.399569	0.268	0.423	1.91327e-05
Ctsd	1.54116e-09	-0.390483	0.177	0.319	1.97854e-05
Rpl7l1	1.69864e-09	0.307174	0.562	0.442	2.18071e-05
Ndufc1	1.75138e-09	0.258654	0.841	0.766	2.24842e-05
Pfdn4	2.06301e-09	0.315288	0.541	0.402	2.6485e-05
Eif5	2.19852e-09	-0.265789	0.729	0.798	2.82246e-05
Fam111a	3.31899e-09	-0.40546	0.133	0.264	4.26092e-05
Apoc1	3.34548e-09	0.352637	0.391	0.256	4.29493e-05
Ybx3	3.69952e-09	0.306442	0.627	0.505	4.74945e-05
Kif20b	3.83208e-09	0.312826	0.627	0.506	4.91962e-05
St13	4.02488e-09	0.270414	0.762	0.667	5.16715e-05
Cenpe	5.02761e-09	0.341718	0.529	0.406	6.45445e-05
Sparc	6.43614e-09	-0.443485	0.342	0.477	8.26272e-05
Lage3	7.40069e-09	-0.374113	0.224	0.37	9.50101e-05
Mpc2	7.42029e-09	-0.358255	0.142	0.273	9.52617e-05
Fscn1	8.78028e-09	0.347712	0.487	0.371	0.000112721
Utp14a	1.1777e-08	0.273905	0.699	0.572	0.000151193
Psmb3	1.2174e-08	0.262174	0.75	0.626	0.00015629
2010107E04Rik	1.46359e-08	0.275882	0.695	0.581	0.000187896
Hells	1.64633e-08	0.258575	0.814	0.755	0.000211355
Ubxn2a	1.65495e-08	0.262828	0.676	0.55	0.000212462
Srsf11	1.73149e-08	-0.305134	0.653	0.737	0.000222289
Anapc13	2.26441e-08	0.306663	0.592	0.47	0.000290705
Hacd2	2.40001e-08	-0.346115	0.25	0.391	0.000308113
Cenpa	2.46235e-08	0.43562	0.377	0.267	0.000316116
0610010K14Rik	2.73391e-08	0.364141	0.271	0.161	0.000350979
Zc3h11a	3.35448e-08	-0.348466	0.345	0.493	0.000430648
Ubc	3.61023e-08	-0.368988	0.245	0.376	0.000463482
Polr2a	3.68221e-08	-0.304001	0.196	0.333	0.000472722
Suz12	3.68308e-08	0.325038	0.525	0.401	0.000472833
Arl6ip1	4.03676e-08	0.278934	0.751	0.643	0.000518239
Rps7	4.11432e-08	-0.379215	0.212	0.348	0.000528197
1810037I17Rik	4.16885e-08	-0.376421	0.371	0.499	0.000535197
Arglu1	4.69866e-08	0.261419	0.676	0.556	0.000603214
Cnih4	5.24247e-08	-0.346801	0.228	0.364	0.000673029
Zfp428	5.51154e-08	0.312392	0.438	0.314	0.000707571
Rest	5.78303e-08	0.339743	0.511	0.407	0.000742425
Aimp1	5.79683e-08	0.279317	0.634	0.521	0.000744197
Vim	5.84068e-08	0.278664	0.557	0.441	0.000749827
Atp5g1	6.00254e-08	0.298168	0.555	0.446	0.000770607
Selenow	6.14071e-08	0.319762	0.473	0.351	0.000788344
Atp6v1a	6.29047e-08	-0.38476	0.326	0.458	0.000807571
Ptms	6.32525e-08	0.309651	0.401	0.273	0.000812035
Gfer	6.41813e-08	-0.366727	0.156	0.281	0.000823959
Nop14	6.65035e-08	-0.316318	0.564	0.665	0.000853772
Rsrp1	6.74311e-08	-0.336602	0.266	0.414	0.00086568
Sgk1	7.67051e-08	0.352688	0.368	0.249	0.00098474
Psat1	7.8651e-08	0.399722	0.278	0.171	0.00100972
Cobl	8.36517e-08	0.34299	0.306	0.191	0.00107392
Tox4	9.12905e-08	-0.396075	0.166	0.293	0.00117199
Ndufb4	1.08357e-07	0.341517	0.492	0.385	0.00139108
Morc1	1.19447e-07	0.298803	0.532	0.407	0.00153346
Mki67	1.26551e-07	0.313343	0.45	0.332	0.00162466
Npc2	1.30157e-07	-0.307534	0.447	0.572	0.00167095
Ndufb10	1.42809e-07	0.2924	0.562	0.464	0.00183338
Dnajc7	1.61266e-07	0.297106	0.59	0.482	0.00207033
Epb41l4a	1.76955e-07	0.328976	0.384	0.271	0.00227175
Cox6b2	1.81962e-07	-0.342763	0.142	0.258	0.00233602
Snhg15	2.01835e-07	-0.359918	0.27	0.414	0.00259116
Xrcc1	2.1678e-07	-0.276127	0.14	0.256	0.00278302
Vdac1	2.30381e-07	0.306713	0.52	0.415	0.00295764
Phb2	2.40098e-07	0.254418	0.56	0.448	0.00308238
Mrpl52	2.7362e-07	0.293492	0.55	0.461	0.00351273
Chchd1	2.79485e-07	0.30681	0.494	0.383	0.00358802
Slu7	3.15844e-07	-0.313792	0.168	0.29	0.0040548
Stmn1	3.23223e-07	0.340891	0.382	0.272	0.00414954
Dst	3.3215e-07	-0.524252	0.277	0.405	0.00426414
Swi5	3.59378e-07	0.275433	0.637	0.557	0.0046137
Safb2	3.73907e-07	-0.380395	0.306	0.431	0.00480021
Atp6v0b	3.74839e-07	-0.300251	0.238	0.371	0.00481218
Tagln2	3.79713e-07	-0.338647	0.149	0.263	0.00487475
Mrpl12	3.89596e-07	0.294218	0.497	0.394	0.00500164
Fkbp4	4.11275e-07	0.297133	0.574	0.488	0.00527995
Ahnak	4.27932e-07	-0.405189	0.179	0.296	0.00549379
Zcchc11	4.76351e-07	-0.318149	0.147	0.262	0.0061154
Ubtf	4.96263e-07	0.268503	0.571	0.466	0.00637102
Gps2	5.55543e-07	-0.322723	0.14	0.254	0.00713206
Laptm5	7.02037e-07	-0.332596	0.254	0.38	0.00901274
Zmynd8	9.0015e-07	-0.299611	0.278	0.413	0.0115561
Irf2bpl	9.05327e-07	-0.270322	0.142	0.251	0.0116226
Ociad1	9.08214e-07	-0.303266	0.24	0.37	0.0116597
Tuba1c	1.00039e-06	0.366717	0.391	0.293	0.012843
Orc6	1.0136e-06	-0.317696	0.349	0.467	0.0130125
Spc24	1.0197e-06	0.25683	0.601	0.496	0.0130909
Ttf1	1.13026e-06	-0.270631	0.149	0.258	0.0145102
Ptrh2	1.14665e-06	-0.303601	0.145	0.255	0.0147206
Rbm17	1.2068e-06	-0.304505	0.557	0.65	0.0154928
Hirip3	1.23126e-06	0.310308	0.473	0.361	0.0158069
Atp6v1f	1.28472e-06	-0.295363	0.335	0.458	0.0164933
Upf2	1.30844e-06	-0.320384	0.249	0.37	0.0167977
Mrps28	1.44649e-06	0.343041	0.38	0.28	0.01857
Clspn	1.55074e-06	-0.265665	0.175	0.293	0.0199084
Yes1	2.05648e-06	0.356822	0.266	0.173	0.0264011
Kin	2.1711e-06	-0.295101	0.184	0.3	0.0278726
Prdx2	2.29243e-06	0.289617	0.475	0.365	0.0294302
Cyb5r3	2.32372e-06	-0.320323	0.335	0.449	0.0298319
Ppa1	2.47951e-06	0.287633	0.487	0.383	0.031832
Nktr	2.71571e-06	-0.285339	0.301	0.435	0.0348642
Trpm7	2.88392e-06	-0.328302	0.191	0.301	0.0370238
Rpl39l	2.89821e-06	0.25769	0.59	0.504	0.0372072
Cdc20	2.95206e-06	0.291812	0.45	0.355	0.0378986
Snrpa1	2.97763e-06	0.258157	0.501	0.406	0.0382269
Atp6v1e1	3.10296e-06	-0.329175	0.319	0.437	0.0398357
Bccip	3.57918e-06	0.302566	0.585	0.522	0.0459496
Zcchc17	3.61523e-06	-0.358284	0.305	0.419	0.0464123
