# Supplementary material for: ATR expands embryonic stem cell fate potential in response to replication stress
Source: eLife. 2020 Mar 12;9:e54756. doi: 10.7554/eLife.54756 (PMC7067586; doi:10.7554/eLife.54756)
Supplement: Supplementary file 2. [file elife-54756-supp2.xlsx]

## Sheet: Cluster4-Biological Process
Supplementary Table2. Gene ontology enrichment analysis of biological process, molecluar function and cellular components of the genes differentially expressed between each cluster and the rest of the population.
Term	P-value	Adjusted P-value	Old P-value	Old Adjusted P-value	Z-score	Combined Score	Genes
urate metabolic process (GO:0046415)	0.00151917	0.209465	0.00116204	0.118143	-2.22372	14.431	PRPS1;PNP
cell migration involved in sprouting angiogenesis (GO:0002042)	0.00239382	0.209465	0.00172452	0.118143	-2.3365	14.1005	TDGF1;ROBO1
tRNA splicing, via endonucleolytic cleavage and ligation (GO:0006388)	0.00208127	0.209465	0.0015252	0.118143	-2.24255	13.8472	CLP1;TSEN2
endodermal cell fate commitment (GO:0001711)	0.000836619	0.209465	0.000707291	0.118143	-1.86274	13.1996	SOX2;CTR9
regulation of cell division (GO:0051302)	0.00417528	0.209465	0.00204341	0.118143	-2.27873	12.4842	PRPF40A;KLHL13;FGF1
regulation of endothelial cell chemotaxis to fibroblast growth factor (GO:2000544)	0.0385409	0.277381	0.0324594	0.208328	-3.64683	11.8742	FGF1
nucleobase metabolic process (GO:0009112)	0.0338049	0.277381	0.0289045	0.208328	-3.32612	11.2661	PRPS1
regulation of chemokine-mediated signaling pathway (GO:0070099)	0.0338049	0.277381	0.0289045	0.208328	-3.30996	11.2113	ROBO1
regulation of cytokinesis (GO:0032465)	0.0066544	0.209465	0.0032265	0.118143	-2.21872	11.1213	KIF14;PRPF40A;KLHL13
protein retention in ER lumen (GO:0006621)	0.0338049	0.277381	0.0289045	0.208328	-3.25732	11.033	OS9
glomerular epithelial cell development (GO:0072310)	0.0432539	0.277381	0.0360015	0.208328	-3.42543	10.7581	IQGAP1
kidney epithelium development (GO:0072073)	0.0385409	0.277381	0.0324594	0.208328	-3.29667	10.7341	FGF1
regulation of mRNA splicing, via spliceosome (GO:0048024)	0.00334223	0.209465	0.00164597	0.118143	-1.84786	10.5349	RBM25;YTHDC1;CWC22
nodal signaling pathway (GO:0038092)	0.0432539	0.277381	0.0360015	0.208328	-3.35186	10.5271	TDGF1
blood vessel endothelial cell migration (GO:0043534)	0.0038491	0.209465	0.00263804	0.118143	-1.87857	10.4447	TDGF1;ROBO1
cellular response to interleukin-6 (GO:0071354)	0.00611449	0.209465	0.00403523	0.118143	-2.00441	10.2167	CTR9;TDGF1
purine nucleotide metabolic process (GO:0006163)	0.00469695	0.209465	0.00316338	0.118143	-1.9014	10.1931	PRPS1;PNP
regulation of alpha-beta T cell differentiation (GO:0046637)	0.0385409	0.277381	0.0324594	0.208328	-3.12857	10.1867	PNP
positive regulation of cellular senescence (GO:2000774)	0.0385409	0.277381	0.0324594	0.208328	-3.12737	10.1828	ARG2
positive regulation of cell aging (GO:0090343)	0.0432539	0.277381	0.0360015	0.208328	-3.23552	10.1617	ARG2
negative regulation of telomere capping (GO:1904354)	0.0385409	0.277381	0.0324594	0.208328	-3.08527	10.0458	ERCC4
positive regulation of mitochondrial membrane permeability involved in apoptotic process (GO:1902110)	0.0432539	0.277381	0.0360015	0.208328	-3.14125	9.86564	ATF2
negative regulation of chromosome organization (GO:2001251)	0.0338049	0.277381	0.0289045	0.208328	-2.88296	9.76502	ERCC4
purine nucleobase biosynthetic process (GO:0009113)	0.0338049	0.277381	0.0289045	0.208328	-2.86527	9.7051	PRPS1
pyrimidine-containing compound biosynthetic process (GO:0072528)	0.0338049	0.277381	0.0289045	0.208328	-2.85178	9.65941	PRPS1
purine-containing compound biosynthetic process (GO:0072522)	0.0056228	0.209465	0.00373354	0.118143	-1.86021	9.63758	PRPS1;PNP
peroxisome organization (GO:0007031)	0.00611449	0.209465	0.00403523	0.118143	-1.86995	9.5313	PLA2G16;LONP2
SCF complex assembly (GO:0010265)	0.0338049	0.277381	0.0289045	0.208328	-2.76387	9.36165	CAND1
RNA splicing, via endonucleolytic cleavage and ligation (GO:0000394)	0.00239382	0.209465	0.00172452	0.118143	-1.53871	9.28593	CLP1;TSEN2
glomerular visceral epithelial cell development (GO:0072015)	0.0432539	0.277381	0.0360015	0.208328	-2.89285	9.08546	IQGAP1
cellular response to epidermal growth factor stimulus (GO:0071364)	0.0071544	0.209465	0.00467141	0.123092	-1.8345	9.06249	IQGAP1;TDGF1
peroxisomal transport (GO:0043574)	0.0432539	0.277381	0.0360015	0.208328	-2.88047	9.04659	LONP2
regulation of mitochondrial membrane permeability involved in apoptotic process (GO:1902108)	0.0385409	0.277381	0.0324594	0.208328	-2.73622	8.90923	ATF2
establishment of protein localization to peroxisome (GO:0072663)	0.0385409	0.277381	0.0324594	0.208328	-2.72629	8.87688	LONP2
ornithine metabolic process (GO:0006591)	0.0479441	0.277381	0.0395309	0.208328	-2.90039	8.81058	ARG2
regulation of cell communication (GO:0010646)	0.00532797	0.209465	0.00259322	0.118143	-1.67884	8.78834	GLRX2;TDGF1;MGLL
retrograde axonal transport (GO:0008090)	0.0385409	0.277381	0.0324594	0.208328	-2.68184	8.73216	DST
long-chain fatty acid import (GO:0044539)	0.0385409	0.277381	0.0324594	0.208328	-2.66437	8.67527	SLC27A2
negative regulation of chemotaxis (GO:0050922)	0.0572563	0.277381	0.0465518	0.208672	-3.01974	8.63712	ROBO1
regulation of sensory perception (GO:0051931)	0.0432539	0.277381	0.0360015	0.208328	-2.74775	8.62976	MGLL
telomere maintenance via recombination (GO:0000722)	0.0526115	0.277381	0.0430477	0.208672	-2.92324	8.60842	ERCC4
regulation of mRNA processing (GO:0050684)	0.00885275	0.245547	0.00570646	0.143205	-1.81962	8.60141	YTHDC1;CWC22
regulation of telomere maintenance (GO:0032204)	0.0071544	0.209465	0.00467141	0.123092	-1.69033	8.35028	ERCC4;HNRNPD
positive regulation of cell division (GO:0051781)	0.0180168	0.277381	0.0112629	0.204674	-2.0623	8.28314	KIF14;FGF1
mRNA splicing, via spliceosome (GO:0000398)	0.00939131	0.247461	0.00285697	0.118143	-1.72718	8.06243	AQR;CLP1;CWC22;HNRNPD;PRPF40A
purine nucleotide biosynthetic process (GO:0006164)	0.0385409	0.277381	0.0324594	0.208328	-2.46747	8.03416	PRPS1
fatty acid alpha-oxidation (GO:0001561)	0.0432539	0.277381	0.0360015	0.208328	-2.55008	8.00894	SLC27A2
pituitary gland development (GO:0021983)	0.0385409	0.277381	0.0324594	0.208328	-2.45654	7.99859	SOX2
positive regulation of alpha-beta T cell differentiation (GO:0046638)	0.0432539	0.277381	0.0360015	0.208328	-2.49664	7.8411	PNP
RNA processing (GO:0006396)	0.00267271	0.209465	0.000781914	0.118143	-1.3148	7.78977	RBM39;CLP1;HNRNPD;PPIG;TSEN2
negative regulation of mRNA polyadenylation (GO:1900364)	0.0432539	0.277381	0.0360015	0.208328	-2.47346	7.7683	CTR9
regulation of multicellular organismal development (GO:2000026)	0.0196709	0.277381	0.0122654	0.208328	-1.97458	7.75735	PLA2G16;FGF1
regulation of sensory perception of pain (GO:0051930)	0.0479441	0.277381	0.0395309	0.208328	-2.55179	7.75163	MGLL
double-strand break repair via nonhomologous end joining (GO:0006303)	0.0259335	0.277381	0.0160667	0.208328	-2.11723	7.73259	BABAM2;ERCC4
maintenance of protein localization in endoplasmic reticulum (GO:0035437)	0.0479441	0.277381	0.0395309	0.208328	-2.52592	7.67304	OS9
negative regulation of mRNA 3'-end processing (GO:0031441)	0.0479441	0.277381	0.0395309	0.208328	-2.51145	7.62909	CTR9
positive regulation of protein serine/threonine kinase activity (GO:0071902)	0.0207509	0.277381	0.0100521	0.189195	-1.95587	7.57931	CAB39;FGF1;ROBO1
mRNA cleavage (GO:0006379)	0.0432539	0.277381	0.0360015	0.208328	-2.41249	7.57682	CLP1
regulation of integrin activation (GO:0033623)	0.0479441	0.277381	0.0395309	0.208328	-2.47544	7.5197	KIF14
arginine catabolic process (GO:0006527)	0.0432539	0.277381	0.0360015	0.208328	-2.38637	7.49478	ARG2
regulation of morphogenesis of an epithelium (GO:1905330)	0.0479441	0.277381	0.0395309	0.208328	-2.45173	7.44767	FGF1
regulation of fatty acid beta-oxidation (GO:0031998)	0.0526115	0.277381	0.0430477	0.208672	-2.50829	7.38646	LONP2
small RNA loading onto RISC (GO:0070922)	0.0479441	0.277381	0.0395309	0.208328	-2.41537	7.33721	CLP1
regulation of nucleic acid-templated transcription (GO:1903506)	0.0298411	0.277381	0.00678815	0.162607	-2.06829	7.26355	SOX2;ATF2;UBTFL1;CTR9;HNRNPD;GPBP1L1;GLRX2
negative regulation of potassium ion transmembrane transport (GO:1901380)	0.0479441	0.277381	0.0395309	0.208328	-2.39012	7.26053	CAB39
regulation of endothelial cell chemotaxis (GO:2001026)	0.0664783	0.277381	0.0535223	0.208672	-2.67498	7.25155	FGF1
non-recombinational repair (GO:0000726)	0.0249951	0.277381	0.0154964	0.208328	-1.94404	7.17172	BABAM2;ERCC4
mesonephros development (GO:0001823)	0.0572563	0.277381	0.0465518	0.208672	-2.49817	7.14532	FGF1
response to interleukin-6 (GO:0070741)	0.0618785	0.277381	0.0500433	0.208672	-2.55728	7.11585	TDGF1
regulation of histone methylation (GO:0031060)	0.0618785	0.277381	0.0500433	0.208672	-2.54368	7.078	CTR9
negative regulation of potassium ion transmembrane transporter activity (GO:1901017)	0.0432539	0.277381	0.0360015	0.208328	-2.23971	7.0342	CAB39
sprouting angiogenesis (GO:0002040)	0.020521	0.277381	0.0127807	0.208328	-1.80245	7.00489	TDGF1;ROBO1
acylglycerol metabolic process (GO:0006639)	0.0141584	0.277381	0.00892549	0.176012	-1.63143	6.94571	PLA2G16;MGLL
neutrophil degranulation (GO:0043312)	0.0306743	0.277381	0.00835542	0.176012	-1.96793	6.85692	CAND1;PNP;CAB39;IQGAP1;SCAMP1;SLC27A2
regulation of vascular endothelial growth factor signaling pathway (GO:1900746)	0.0572563	0.277381	0.0465518	0.208672	-2.3956	6.85195	ROBO1
positive regulation of steroid biosynthetic process (GO:0010893)	0.0432539	0.277381	0.0360015	0.208328	-2.16872	6.81122	FGF1
negative regulation of retrograde protein transport, ER to cytosol (GO:1904153)	0.0432539	0.277381	0.0360015	0.208328	-2.1554	6.7694	OS9
phosphatidylinositol acyl-chain remodeling (GO:0036149)	0.0801441	0.280587	0.0638844	0.208672	-2.67508	6.75172	PLA2G16
UDP-N-acetylglucosamine biosynthetic process (GO:0006048)	0.0572563	0.277381	0.0465518	0.208672	-2.34688	6.7126	UAP1
positive regulation of alcohol biosynthetic process (GO:1902932)	0.0526115	0.277381	0.0430477	0.208672	-2.27328	6.69439	FGF1
urea cycle (GO:0000050)	0.0572563	0.277381	0.0465518	0.208672	-2.31284	6.61522	ARG2
histone H3-K4 trimethylation (GO:0080182)	0.0479441	0.277381	0.0395309	0.208328	-2.17307	6.60116	CTR9
neutrophil mediated immunity (GO:0002446)	0.0328649	0.277381	0.00901768	0.176012	-1.89155	6.46029	CAND1;PNP;CAB39;IQGAP1;SCAMP1;SLC27A2
amino sugar biosynthetic process (GO:0046349)	0.0618785	0.277381	0.0500433	0.208672	-2.31998	6.45554	UAP1
signal transduction involved in G2 DNA damage checkpoint (GO:0072425)	0.0618785	0.277381	0.0500433	0.208672	-2.3106	6.42944	BABAM2
UDP-N-acetylglucosamine metabolic process (GO:0006047)	0.0618785	0.277381	0.0500433	0.208672	-2.30685	6.41899	UAP1
histone H2B ubiquitination (GO:0033523)	0.0526115	0.277381	0.0430477	0.208672	-2.17918	6.4173	CTR9
negative regulation of meiotic nuclear division (GO:0045835)	0.0338049	0.277381	0.0289045	0.208328	-1.88503	6.38489	ERCC4
purine-containing compound metabolic process (GO:0072521)	0.0846552	0.280587	0.0673136	0.208672	-2.58577	6.3847	PRPS1
RNA splicing, via transesterification reactions with bulged adenosine as nucleophile (GO:0000377)	0.00623027	0.209465	0.00186443	0.118143	-1.25696	6.38325	AQR;CLP1;CWC22;HNRNPD;PRPF40A
purine nucleobase metabolic process (GO:0006144)	0.0572563	0.277381	0.0465518	0.208672	-2.21483	6.33491	PRPS1
mRNA processing (GO:0006397)	0.012967	0.277381	0.00400747	0.118143	-1.45748	6.33326	AQR;CLP1;CWC22;HNRNPD;PRPF40A
negative regulation of protein exit from endoplasmic reticulum (GO:0070862)	0.0479441	0.277381	0.0395309	0.208328	-2.08326	6.32836	OS9
nitric oxide biosynthetic process (GO:0006809)	0.0572563	0.277381	0.0465518	0.208672	-2.20204	6.29831	ARG2
regulation of mRNA polyadenylation (GO:1900363)	0.0572563	0.277381	0.0465518	0.208672	-2.19741	6.28506	CTR9
negative regulation of potassium ion transport (GO:0043267)	0.0572563	0.277381	0.0465518	0.208672	-2.18907	6.26122	CAB39
intra-S DNA damage checkpoint (GO:0031573)	0.075611	0.280587	0.0604428	0.208672	-2.3917	6.17573	ATF2
regulation of axon guidance (GO:1902667)	0.0664783	0.277381	0.0535223	0.208672	-2.27568	6.16909	ZSWIM6
glycerolipid catabolic process (GO:0046503)	0.0664783	0.277381	0.0535223	0.208672	-2.26496	6.14003	MGLL
protein targeting to peroxisome (GO:0006625)	0.075611	0.280587	0.0604428	0.208672	-2.35601	6.08357	LONP2
negative regulation of hemopoiesis (GO:1903707)	0.0710557	0.277381	0.0569888	0.208672	-2.28152	6.033	CTR9
phosphatidylserine acyl-chain remodeling (GO:0036150)	0.102482	0.301657	0.0809077	0.229685	-2.64818	6.03274	PLA2G16
anterior/posterior axis specification (GO:0009948)	0.0891445	0.291796	0.0707305	0.216715	-2.49373	6.02858	TDGF1
embryonic axis specification (GO:0000578)	0.075611	0.280587	0.0604428	0.208672	-2.31919	5.98849	TDGF1
endoplasmic reticulum to cytosol transport (GO:1903513)	0.0801441	0.280587	0.0638844	0.208672	-2.36677	5.97356	OS9
signal transduction involved in DNA damage checkpoint (GO:0072422)	0.0664783	0.277381	0.0535223	0.208672	-2.19594	5.95294	BABAM2
purine-containing compound salvage (GO:0043101)	0.0710557	0.277381	0.0569888	0.208672	-2.22909	5.89438	PNP
positive regulation of histone H3-K4 methylation (GO:0051571)	0.0664783	0.277381	0.0535223	0.208672	-2.16213	5.86129	CTR9
purine-containing compound catabolic process (GO:0072523)	0.0710557	0.277381	0.0569888	0.208672	-2.18065	5.76629	PNP
acylglycerol acyl-chain remodeling (GO:0036155)	0.0432539	0.277381	0.0360015	0.208328	-1.83205	5.75385	MGLL
positive regulation of telomere capping (GO:1904355)	0.0846552	0.280587	0.0673136	0.208672	-2.32982	5.75271	HNRNPD
RNA interference (GO:0016246)	0.0664783	0.277381	0.0535223	0.208672	-2.11546	5.73477	CLP1
positive regulation of alpha-beta T cell activation (GO:0046635)	0.075611	0.280587	0.0604428	0.208672	-2.20298	5.68844	PNP
regulation of mammary gland epithelial cell proliferation (GO:0033599)	0.0526115	0.277381	0.0430477	0.208672	-1.90082	5.59757	ROBO1
nitric oxide metabolic process (GO:0046209)	0.0618785	0.277381	0.0500433	0.208672	-2.0024	5.57184	ARG2
regulation of retrograde protein transport, ER to cytosol (GO:1904152)	0.0618785	0.277381	0.0500433	0.208672	-2.00132	5.56883	OS9
cellular response to osmotic stress (GO:0071470)	0.0710557	0.277381	0.0569888	0.208672	-2.09268	5.53366	CAB39
regulation of histone H3-K4 methylation (GO:0051569)	0.0801441	0.280587	0.0638844	0.208672	-2.14776	5.4208	CTR9
protein exit from endoplasmic reticulum (GO:0032527)	0.0936119	0.29719	0.0741351	0.21949	-2.24877	5.32642	OS9
negative regulation of telomere maintenance (GO:0032205)	0.0846552	0.280587	0.0673136	0.208672	-2.14526	5.29701	ERCC4
ether lipid metabolic process (GO:0046485)	0.0479441	0.277381	0.0395309	0.208328	-1.74306	5.29494	PLA2G16
regulation of axonogenesis (GO:0050770)	0.030835	0.277381	0.0190509	0.208328	-1.52081	5.29106	ZSWIM6;ROBO1
retrograde protein transport, ER to cytosol (GO:0030970)	0.0891445	0.291796	0.0707305	0.216715	-2.18297	5.27733	OS9
positive regulation of transcription elongation from RNA polymerase II promoter (GO:0032968)	0.075611	0.280587	0.0604428	0.208672	-2.02927	5.23989	CTR9
negative regulation of cation transmembrane transport (GO:1904063)	0.0710557	0.277381	0.0569888	0.208672	-1.97575	5.22446	CAB39
long-chain fatty acid metabolic process (GO:0001676)	0.030835	0.277381	0.0190509	0.208328	-1.49676	5.20738	SLC27A2;MGLL
nucleobase-containing compound biosynthetic process (GO:0034654)	0.0846552	0.280587	0.0673136	0.208672	-2.10696	5.20244	PNP
regulation of telomere maintenance via telomere lengthening (GO:1904356)	0.0846552	0.280587	0.0673136	0.208672	-2.10378	5.19459	ERCC4
regulation of RNA splicing (GO:0043484)	0.030835	0.277381	0.0190509	0.208328	-1.4851	5.16681	YTHDC1;CWC22
mammary gland development (GO:0030879)	0.115626	0.301657	0.0909755	0.229685	-2.39218	5.16088	TDGF1
regulation of MAP kinase activity (GO:0043405)	0.0693602	0.277381	0.0428713	0.208672	-1.92995	5.14997	FGF1;ROBO1
regulation of sprouting angiogenesis (GO:1903670)	0.0936119	0.29719	0.0741351	0.21949	-2.15898	5.11376	FGF1
maturation of 5.8S rRNA (GO:0000460)	0.0846552	0.280587	0.0673136	0.208672	-2.06229	5.09214	C1D
negative regulation of ERAD pathway (GO:1904293)	0.0618785	0.277381	0.0500433	0.208672	-1.82874	5.08863	OS9
NAD biosynthesis via nicotinamide riboside salvage pathway (GO:0034356)	0.075611	0.280587	0.0604428	0.208672	-1.95629	5.05143	PNP
embryo development ending in birth or egg hatching (GO:0009792)	0.0846552	0.280587	0.0673136	0.208672	-2.02891	5.00971	TDGF1
3'-UTR-mediated mRNA stabilization (GO:0070935)	0.0846552	0.280587	0.0673136	0.208672	-1.98911	4.91144	DAZL
protein alpha-1,2-demannosylation (GO:0036508)	0.115626	0.301657	0.0909755	0.229685	-2.27334	4.9045	OS9
activin receptor signaling pathway (GO:0032924)	0.0936119	0.29719	0.0741351	0.21949	-2.07008	4.90318	TDGF1
RNA metabolic process (GO:0016070)	0.0684038	0.277381	0.0344174	0.208328	-1.80772	4.84891	RBM39;CLP1;HNRNPD
regulation of myelination (GO:0031641)	0.0846552	0.280587	0.0673136	0.208672	-1.94275	4.79698	KIF14
branching involved in ureteric bud morphogenesis (GO:0001658)	0.0980576	0.301657	0.0775275	0.228251	-2.0415	4.74076	FGF1
positive regulation of translational initiation (GO:0045948)	0.102482	0.301657	0.0809077	0.229685	-2.07382	4.7243	DAZL
mRNA splice site selection (GO:0006376)	0.115626	0.301657	0.0909755	0.229685	-2.17604	4.69458	YTHDC1
positive regulation of endothelial cell migration (GO:0010595)	0.0474727	0.277381	0.0292548	0.208328	-1.53882	4.68971	FGF1;TDGF1
nucleotide-sugar biosynthetic process (GO:0009226)	0.0936119	0.29719	0.0741351	0.21949	-1.95143	4.62216	UAP1
regulation of fatty acid oxidation (GO:0046320)	0.0664783	0.277381	0.0535223	0.208672	-1.7048	4.62152	LONP2
negative regulation of epithelial cell proliferation (GO:0050680)	0.0427697	0.277381	0.026358	0.208328	-1.43601	4.52621	SOX2;ROBO1
cytoskeleton organization (GO:0007010)	0.0245708	0.277381	0.0119346	0.208328	-1.21023	4.48533	DST;SH3KBP1;PRPF40A
transcription-coupled nucleotide-excision repair (GO:0006283)	0.0511182	0.277381	0.0315072	0.208328	-1.49509	4.44583	AQR;ERCC4
negative regulation of ion transmembrane transporter activity (GO:0032413)	0.102482	0.301657	0.0809077	0.229685	-1.94391	4.42836	CAB39
regulation of cellular macromolecule biosynthetic process (GO:2000112)	0.0356858	0.277381	0.00830922	0.176012	-1.32656	4.42141	SOX2;ATF2;UBTFL1;CTR9;HNRNPD;GPBP1L1;GLRX2
tRNA processing (GO:0008033)	0.038255	0.277381	0.0235866	0.208328	-1.35439	4.42003	CLP1;TSEN2
peptidyl-lysine trimethylation (GO:0018023)	0.0846552	0.280587	0.0673136	0.208672	-1.78993	4.41963	CTR9
phosphatidylcholine acyl-chain remodeling (GO:0036151)	0.128579	0.307082	0.100935	0.232972	-2.14484	4.39951	PLA2G16
interleukin-6-mediated signaling pathway (GO:0070102)	0.0710557	0.277381	0.0569888	0.208672	-1.64538	4.35085	CTR9
cellular response to fibroblast growth factor stimulus (GO:0044344)	0.0791668	0.280587	0.0490452	0.208672	-1.70713	4.32962	FGF1;TDGF1
nucleotide-excision repair, preincision complex stabilization (GO:0006293)	0.102482	0.301657	0.0809077	0.229685	-1.89239	4.311	ERCC4
negative regulation of myeloid cell differentiation (GO:0045638)	0.106884	0.301657	0.0842757	0.229685	-1.91407	4.27988	CTR9
histone ubiquitination (GO:0016574)	0.102482	0.301657	0.0809077	0.229685	-1.87182	4.26414	CTR9
neutrophil activation involved in immune response (GO:0002283)	0.0317572	0.277381	0.00868198	0.176012	-1.22248	4.21711	CAND1;PNP;CAB39;IQGAP1;SCAMP1;SLC27A2
regulation of cell cycle G1/S phase transition (GO:1902806)	0.115626	0.301657	0.0909755	0.229685	-1.9408	4.18708	KIF14
regulation of lipid catabolic process (GO:0050994)	0.0846552	0.280587	0.0673136	0.208672	-1.69194	4.17769	LONP2
negative regulation of telomere maintenance via telomere lengthening (GO:1904357)	0.124282	0.301829	0.0976272	0.229685	-1.98206	4.133	ERCC4
regulation of transcription elongation from RNA polymerase II promoter (GO:0034243)	0.111266	0.301657	0.0876317	0.229685	-1.87728	4.1222	CTR9
purine nucleotide catabolic process (GO:0006195)	0.0710557	0.277381	0.0569888	0.208672	-1.55149	4.1026	PNP
regulation of endothelial cell migration (GO:0010594)	0.0462798	0.277381	0.0285191	0.208328	-1.33493	4.1023	FGF1;TDGF1
regulation of cellular senescence (GO:2000772)	0.115626	0.301657	0.0909755	0.229685	-1.89755	4.09376	ARG2
histone monoubiquitination (GO:0010390)	0.115626	0.301657	0.0909755	0.229685	-1.88428	4.06514	CTR9
STAT cascade (GO:0097696)	0.106884	0.301657	0.0842757	0.229685	-1.81659	4.06191	CTR9
lipid catabolic process (GO:0016042)	0.102482	0.301657	0.0809077	0.229685	-1.76168	4.01323	PLA2G16
positive regulation of MAP kinase activity (GO:0043406)	0.0571127	0.277381	0.028482	0.208328	-1.39753	4.00076	FGF1;TDGF1;ROBO1
glomerular visceral epithelial cell differentiation (GO:0072112)	0.0664783	0.277381	0.0535223	0.208672	-1.47377	3.99523	IQGAP1
endoplasmic reticulum mannose trimming (GO:1904380)	0.0936119	0.29719	0.0741351	0.21949	-1.66536	3.94456	OS9
positive regulation of epithelial cell migration (GO:0010634)	0.0523552	0.277381	0.0322729	0.208328	-1.32431	3.90633	FGF1;TDGF1
bile acid biosynthetic process (GO:0006699)	0.124282	0.301829	0.0976272	0.229685	-1.86924	3.89774	SLC27A2
cytoskeleton-dependent intracellular transport (GO:0030705)	0.124282	0.301829	0.0976272	0.229685	-1.86517	3.88926	KIF14
nucleotide-excision repair, DNA incision, 3'-to lesion (GO:0006295)	0.106884	0.301657	0.0842757	0.229685	-1.73885	3.88808	ERCC4
positive regulation of histone methylation (GO:0031062)	0.115626	0.301657	0.0909755	0.229685	-1.79502	3.87257	CTR9
neuron projection extension (GO:1990138)	0.132855	0.307082	0.104231	0.232972	-1.91852	3.87253	IQGAP1
chaperone mediated protein folding requiring cofactor (GO:0051085)	0.115626	0.301657	0.0909755	0.229685	-1.78704	3.85535	DNAJB14
endocrine system development (GO:0035270)	0.124282	0.301829	0.0976272	0.229685	-1.84354	3.84414	SOX2
determination of bilateral symmetry (GO:0009855)	0.13711	0.314162	0.107515	0.239074	-1.90431	3.78381	TDGF1
regulation of telomere capping (GO:1904353)	0.111266	0.301657	0.0876317	0.229685	-1.71461	3.76499	HNRNPD
nucleotide catabolic process (GO:0009166)	0.0846552	0.280587	0.0673136	0.208672	-1.52443	3.76406	PNP
regulation of cell cycle process (GO:0010564)	0.0735111	0.280587	0.0454791	0.208672	-1.43849	3.75492	PRPF40A;KLHL13
rRNA modification (GO:0000154)	0.106884	0.301657	0.0842757	0.229685	-1.67799	3.752	NOP58
positive regulation of protein kinase activity (GO:0045860)	0.0533158	0.277381	0.0265074	0.208328	-1.27278	3.73118	CAB39;KIF14;IQGAP1
cellular nitrogen compound biosynthetic process (GO:0044271)	0.111266	0.301657	0.0876317	0.229685	-1.69907	3.73088	ARG2
RNA polyadenylation (GO:0043631)	0.132855	0.307082	0.104231	0.232972	-1.8448	3.72371	CLP1
gland development (GO:0048732)	0.0536028	0.277381	0.0330459	0.208328	-1.26875	3.71256	SOX2;TDGF1
positive regulation of peptidyl-threonine phosphorylation (GO:0010800)	0.119965	0.301829	0.0943074	0.229685	-1.75044	3.71192	CAB39
regulation of potassium ion transmembrane transporter activity (GO:1901016)	0.119965	0.301829	0.0943074	0.229685	-1.73738	3.68421	CAB39
positive regulation of translation (GO:0045727)	0.0574085	0.277381	0.0354082	0.208328	-1.28917	3.68388	DAZL;HNRNPD
glial cell differentiation (GO:0010001)	0.119965	0.301829	0.0943074	0.229685	-1.7357	3.68065	SOX2
long-chain fatty acid transport (GO:0015909)	0.119965	0.301829	0.0943074	0.229685	-1.7356	3.68044	SLC27A2
nucleotide-excision repair, DNA incision, 5'-to lesion (GO:0006296)	0.170416	0.337629	0.133367	0.258398	-2.06416	3.65256	ERCC4
bile acid metabolic process (GO:0008206)	0.141345	0.318328	0.110788	0.242262	-1.8492	3.61805	SLC27A2
RNA phosphodiester bond hydrolysis (GO:0090501)	0.132855	0.307082	0.104231	0.232972	-1.79116	3.61545	CLP1
positive regulation of telomerase activity (GO:0051973)	0.162211	0.333926	0.126974	0.255401	-1.9864	3.61297	HNRNPD
DNA-templated transcription, elongation (GO:0006354)	0.0999515	0.301657	0.0622797	0.208672	-1.56751	3.61009	CTR9;NELFA
mitotic sister chromatid segregation (GO:0000070)	0.0626243	0.277381	0.0386569	0.208328	-1.28274	3.55396	CEP57L1;KIF14
nucleotide biosynthetic process (GO:0009165)	0.124282	0.301829	0.0976272	0.229685	-1.69958	3.54397	PRPS1
positive regulation of DNA-templated transcription, elongation (GO:0032786)	0.115626	0.301657	0.0909755	0.229685	-1.64	3.53813	CTR9
positive regulation of Rho protein signal transduction (GO:0035025)	0.119965	0.301829	0.0943074	0.229685	-1.66768	3.53642	ROBO1
regulation of chemotaxis (GO:0050920)	0.115626	0.301657	0.0909755	0.229685	-1.63146	3.5197	ZSWIM6
regulation of chromosome organization (GO:0033044)	0.115626	0.301657	0.0909755	0.229685	-1.6314	3.51957	HNRNPD
activation of protein kinase B activity (GO:0032148)	0.141345	0.318328	0.110788	0.242262	-1.78715	3.49666	FGF1
positive regulation of sprouting angiogenesis (GO:1903672)	0.132855	0.307082	0.104231	0.232972	-1.72559	3.4831	FGF1
negative regulation of tumor necrosis factor production (GO:0032720)	0.162211	0.333926	0.126974	0.255401	-1.91413	3.48153	ARG2
substrate adhesion-dependent cell spreading (GO:0034446)	0.149752	0.323289	0.117297	0.245301	-1.82594	3.46705	KIF14
NAD biosynthetic process (GO:0009435)	0.106884	0.301657	0.0842757	0.229685	-1.5304	3.42199	PNP
global genome nucleotide-excision repair (GO:0070911)	0.149752	0.323289	0.117297	0.245301	-1.78213	3.38386	ERCC4
regulation of apoptotic process (GO:0042981)	0.105621	0.301657	0.0294401	0.208328	-1.50499	3.38307	SOX2;BABAM2;RBM25;CSRNP3;ARHGEF26;KIF14;TDGF1
sister chromatid segregation (GO:0000819)	0.149752	0.323289	0.117297	0.245301	-1.76368	3.34882	CEP57L1
transcription elongation from RNA polymerase II promoter (GO:0006368)	0.0806016	0.280587	0.0499522	0.208672	-1.32331	3.3324	CTR9;NELFA
acylglycerol catabolic process (GO:0046464)	0.141345	0.318328	0.110788	0.242262	-1.70292	3.33185	MGLL
negative chemotaxis (GO:0050919)	0.124282	0.301829	0.0976272	0.229685	-1.59248	3.32063	ROBO1
mRNA polyadenylation (GO:0006378)	0.128579	0.307082	0.100935	0.232972	-1.61618	3.31512	CLP1
response to ionizing radiation (GO:0010212)	0.0561296	0.277381	0.0346136	0.208328	-1.1361	3.27208	BABAM2;ERCC4
regulation of cysteine-type endopeptidase activity (GO:2000116)	0.166323	0.337629	0.130176	0.258398	-1.8001	3.22905	SOX2
cellular macromolecular complex assembly (GO:0034622)	0.158078	0.331901	0.12376	0.252796	-1.75044	3.22898	DNAJB14
protein K63-linked deubiquitination (GO:0070536)	0.132855	0.307082	0.104231	0.232972	-1.58232	3.19391	BABAM2
mitotic DNA damage checkpoint (GO:0044773)	0.178542	0.33875	0.139714	0.259967	-1.84735	3.18287	ATF2
inositol phosphate metabolic process (GO:0043647)	0.210264	0.351775	0.16465	0.269473	-2.03528	3.17379	INPP4B
cellular amino acid biosynthetic process (GO:0008652)	0.132855	0.307082	0.104231	0.232972	-1.55365	3.13603	RIMKLB
nucleotide-excision repair (GO:0006289)	0.0999515	0.301657	0.0622797	0.208672	-1.34974	3.10854	AQR;ERCC4
cellular response to calcium ion (GO:0071277)	0.190583	0.341772	0.149149	0.260543	-1.85999	3.08325	IQGAP1
protein peptidyl-prolyl isomerization (GO:0000413)	0.170416	0.337629	0.133367	0.258398	-1.7385	3.07631	PPIG
double-strand break repair (GO:0006302)	0.153701	0.327092	0.0974366	0.229685	-1.63528	3.06247	BABAM2;ERCC4
regulation of cell migration (GO:0030334)	0.070507	0.277381	0.0296208	0.208328	-1.15427	3.06119	KIF14;FGF1;TDGF1;ROBO1
regulation of nervous system development (GO:0051960)	0.119965	0.301829	0.0943074	0.229685	-1.43026	3.03296	KIF14
positive regulation of T cell differentiation (GO:0045582)	0.149752	0.323289	0.117297	0.245301	-1.58917	3.01746	PNP
anterior/posterior pattern specification (GO:0009952)	0.158078	0.331901	0.12376	0.252796	-1.63545	3.01686	TDGF1
positive regulation of DNA repair (GO:0045739)	0.174489	0.33875	0.136546	0.259967	-1.7277	3.01638	BABAM2
phosphatidylethanolamine acyl-chain remodeling (GO:0036152)	0.124282	0.301829	0.0976272	0.229685	-1.44627	3.01575	PLA2G16
autophagy of mitochondrion (GO:0000422)	0.182575	0.33875	0.14287	0.259967	-1.771	3.01175	FUNDC1
endodermal cell differentiation (GO:0035987)	0.149752	0.323289	0.117297	0.245301	-1.58228	3.00438	CTR9
response to growth factor (GO:0070848)	0.124282	0.301829	0.0976272	0.229685	-1.43072	2.98334	SOX2
regulation of gene expression (GO:0010468)	0.136437	0.313984	0.0351612	0.208328	-1.49681	2.98149	SOX2;ATF2;UBTFL1;YTHDC1;CTR9;HNRNPD;GPBP1L1;GLRX2
histone H3-K4 methylation (GO:0051568)	0.111266	0.301657	0.0876317	0.229685	-1.35095	2.96647	CTR9
negative regulation of catalytic activity (GO:0043086)	0.124282	0.301829	0.0976272	0.229685	-1.41545	2.95149	CAND1
phosphatidylinositol metabolic process (GO:0046488)	0.106145	0.301657	0.0662621	0.208672	-1.31536	2.95029	INPP4B;PLA2G16
'de novo' posttranslational protein folding (GO:0051084)	0.141345	0.318328	0.110788	0.242262	-1.50157	2.9379	DNAJB14
mRNA stabilization (GO:0048255)	0.153925	0.327092	0.120534	0.250085	-1.56669	2.93173	DAZL
negative regulation of homeostatic process (GO:0032845)	0.132855	0.307082	0.104231	0.232972	-1.45027	2.92736	ERCC4
G2 DNA damage checkpoint (GO:0031572)	0.149752	0.323289	0.117297	0.245301	-1.54083	2.92569	BABAM2
negative regulation of protein complex assembly (GO:0031333)	0.162211	0.333926	0.126974	0.255401	-1.6034	2.91636	KIF14
positive regulation of protein phosphorylation (GO:0001934)	0.144854	0.323289	0.0657725	0.208672	-1.50729	2.91213	SOX2;CAB39;IQGAP1;TDGF1
JAK-STAT cascade (GO:0007259)	0.182575	0.33875	0.14287	0.259967	-1.69428	2.88128	CTR9
positive regulation of response to DNA damage stimulus (GO:2001022)	0.218003	0.357905	0.170772	0.274381	-1.87544	2.85676	BABAM2
negative regulation of tumor necrosis factor superfamily cytokine production (GO:1903556)	0.145559	0.323289	0.114048	0.245301	-1.48132	2.85475	ARG2
cellular response to heat (GO:0034605)	0.210264	0.351775	0.16465	0.269473	-1.8223	2.84167	FGF1
cellular macromolecule catabolic process (GO:0044265)	0.214143	0.356004	0.167716	0.272798	-1.836	2.82948	HNRNPD
cellular iron ion homeostasis (GO:0006879)	0.244504	0.383492	0.191855	0.296504	-2.00601	2.82552	CAND1
mitochondrion disassembly (GO:0061726)	0.174489	0.33875	0.136546	0.259967	-1.56871	2.7388	FUNDC1
positive regulation of cytokinesis (GO:0032467)	0.158078	0.331901	0.12376	0.252796	-1.47718	2.7249	KIF14
phosphatidylserine metabolic process (GO:0006658)	0.128579	0.307082	0.100935	0.232972	-1.32435	2.71652	PLA2G16
RNA catabolic process (GO:0006401)	0.194557	0.341772	0.152272	0.260543	-1.64789	2.69764	HNRNPD
telomere organization (GO:0032200)	0.186588	0.34025	0.146015	0.259967	-1.60645	2.69699	ERCC4
regulation of potassium ion transmembrane transport (GO:1901379)	0.149752	0.323289	0.117297	0.245301	-1.41653	2.68967	CAB39
regulation of cholesterol biosynthetic process (GO:0045540)	0.182575	0.33875	0.14287	0.259967	-1.58047	2.68774	FGF1
peptide transport (GO:0015833)	0.186588	0.34025	0.146015	0.259967	-1.5915	2.67189	SCAMP1
negative regulation of neurogenesis (GO:0050768)	0.153925	0.327092	0.120534	0.250085	-1.42181	2.66062	SOX2
positive regulation of viral process (GO:0048524)	0.198513	0.341883	0.155383	0.260786	-1.63401	2.64203	NELFA
macroautophagy (GO:0016236)	0.103035	0.301657	0.0642603	0.208672	-1.15468	2.62422	FUNDC1;TOMM6
arachidonic acid metabolic process (GO:0019369)	0.225667	0.362581	0.17685	0.27988	-1.75569	2.61368	MGLL
regulation of signal transduction (GO:0009966)	0.107645	0.301657	0.0557396	0.208672	-1.17219	2.61272	GLRX2;TDGF1;MGLL
regulation of peptidyl-threonine phosphorylation (GO:0010799)	0.170416	0.337629	0.133367	0.258398	-1.47319	2.60682	CAB39
regulation of G1/S transition of mitotic cell cycle (GO:2000045)	0.206366	0.348573	0.161572	0.266923	-1.64744	2.59983	KIF14
posttranscriptional regulation of gene expression (GO:0010608)	0.198513	0.341883	0.155383	0.260786	-1.60517	2.59541	YTHDC1
cellular response to radiation (GO:0071478)	0.190583	0.341772	0.149149	0.260543	-1.56474	2.59382	ERCC4
regulation of DNA repair (GO:0006282)	0.170416	0.337629	0.133367	0.258398	-1.45955	2.58269	BABAM2
negative regulation of ERBB signaling pathway (GO:1901185)	0.194557	0.341772	0.152272	0.260543	-1.57766	2.58268	SH3KBP1
sensory organ development (GO:0007423)	0.182575	0.33875	0.14287	0.259967	-1.51714	2.58005	SOX2
axonal transport (GO:0098930)	0.166323	0.337629	0.130176	0.258398	-1.4322	2.56911	DST
cellular response to ionizing radiation (GO:0071479)	0.206366	0.348573	0.161572	0.266923	-1.6098	2.54043	ERCC4
mitotic metaphase plate congression (GO:0007080)	0.194557	0.341772	0.152272	0.260543	-1.54086	2.52243	KIF14
positive regulation of axonogenesis (GO:0050772)	0.170416	0.337629	0.133367	0.258398	-1.41669	2.50685	ROBO1
DNA damage checkpoint (GO:0000077)	0.174489	0.33875	0.136546	0.259967	-1.43144	2.49915	ERCC4
positive regulation of Ras protein signal transduction (GO:0046579)	0.182575	0.33875	0.14287	0.259967	-1.46636	2.49368	ROBO1
activation of protein kinase activity (GO:0032147)	0.107645	0.301657	0.0557396	0.208672	-1.11517	2.48561	KIF14;FGF1;TDGF1
protein monoubiquitination (GO:0006513)	0.170416	0.337629	0.133367	0.258398	-1.39875	2.47511	CTR9
negative regulation of cytokine-mediated signaling pathway (GO:0001960)	0.182575	0.33875	0.14287	0.259967	-1.45412	2.47287	ROBO1
regulation of alternative mRNA splicing, via spliceosome (GO:0000381)	0.178542	0.33875	0.139714	0.259967	-1.43164	2.46661	RBM25
unsaturated fatty acid metabolic process (GO:0033559)	0.198513	0.341883	0.155383	0.260786	-1.52229	2.4614	MGLL
regulation of DNA metabolic process (GO:0051052)	0.206366	0.348573	0.161572	0.266923	-1.55297	2.45075	HNRNPD
anatomical structure homeostasis (GO:0060249)	0.162211	0.333926	0.126974	0.255401	-1.34538	2.44705	ERCC4
positive regulation of telomere maintenance (GO:0032206)	0.149752	0.323289	0.117297	0.245301	-1.27138	2.41405	HNRNPD
determination of left/right symmetry (GO:0007368)	0.190583	0.341772	0.149149	0.260543	-1.45316	2.40885	TDGF1
epidermal growth factor receptor signaling pathway (GO:0007173)	0.248216	0.385921	0.194824	0.296955	-1.71954	2.3961	IQGAP1
peptidyl-proline modification (GO:0018208)	0.182575	0.33875	0.14287	0.259967	-1.40207	2.38436	PPIG
organic hydroxy compound biosynthetic process (GO:1901617)	0.218003	0.357905	0.170772	0.274381	-1.56387	2.38216	SLC27A2
negative regulation of epidermal growth factor receptor signaling pathway (GO:0042059)	0.182575	0.33875	0.14287	0.259967	-1.39812	2.37763	SH3KBP1
response to hydrogen peroxide (GO:0042542)	0.194557	0.341772	0.152272	0.260543	-1.4424	2.36126	GLRX2
cellular response to growth factor stimulus (GO:0071363)	0.150296	0.323289	0.0951697	0.229685	-1.23633	2.34303	IQGAP1;TDGF1
negative regulation of TOR signaling (GO:0032007)	0.182575	0.33875	0.14287	0.259967	-1.35898	2.31108	PREX2
interstrand cross-link repair (GO:0036297)	0.214143	0.356004	0.167716	0.272798	-1.48584	2.28985	ERCC4
nucleotide-excision repair, DNA incision (GO:0033683)	0.182575	0.33875	0.14287	0.259967	-1.33658	2.27298	ERCC4
regulation of Rho protein signal transduction (GO:0035023)	0.248216	0.385921	0.194824	0.296955	-1.62909	2.27007	ROBO1
fatty acid oxidation (GO:0019395)	0.221844	0.359729	0.173817	0.276741	-1.49908	2.25729	SLC27A2
carboxylic acid biosynthetic process (GO:0046394)	0.198513	0.341883	0.155383	0.260786	-1.37792	2.22795	RIMKLB
nucleobase-containing compound catabolic process (GO:0034655)	0.194557	0.341772	0.152272	0.260543	-1.35969	2.22585	HNRNPD
negative regulation of DNA metabolic process (GO:0051053)	0.194557	0.341772	0.152272	0.260543	-1.34995	2.20991	ERCC4
spliceosomal complex assembly (GO:0000245)	0.186588	0.34025	0.146015	0.259967	-1.31422	2.20637	YTHDC1
positive regulation of cellular amide metabolic process (GO:0034250)	0.262886	0.393583	0.206592	0.300757	-1.65023	2.20476	HNRNPD
peptidyl-serine phosphorylation (GO:0018105)	0.160555	0.333926	0.102017	0.232972	-1.20399	2.20224	CAB39;TDGF1
eye development (GO:0001654)	0.194557	0.341772	0.152272	0.260543	-1.34317	2.19881	SOX2
protein ubiquitination (GO:0016567)	0.103645	0.301657	0.0386392	0.208328	-0.963663	2.18441	CAND1;OS9;CTR9;FBXO15;KLHL13
activation of MAPK activity (GO:0000187)	0.114027	0.301657	0.071357	0.217371	-0.985517	2.13987	FGF1;TDGF1
axon guidance (GO:0007411)	0.183195	0.33875	0.117298	0.245301	-1.25593	2.13157	SH3KBP1;ROBO1
positive regulation of viral transcription (GO:0050434)	0.186588	0.34025	0.146015	0.259967	-1.26258	2.11968	NELFA
amide biosynthetic process (GO:0043604)	0.198513	0.341883	0.155383	0.260786	-1.30275	2.10642	ARG2
regulation of protein kinase activity (GO:0045859)	0.164004	0.336304	0.104329	0.232972	-1.14731	2.07418	PREX2;IQGAP1
polyol metabolic process (GO:0019751)	0.210264	0.351775	0.16465	0.269473	-1.32622	2.0681	INPP4B
regulation of angiogenesis (GO:0045765)	0.217027	0.357905	0.140579	0.259967	-1.35182	2.06522	ATF2;FGF1
glutathione metabolic process (GO:0006749)	0.218003	0.357905	0.170772	0.274381	-1.32886	2.02418	GLRX2
fatty acid beta-oxidation (GO:0006635)	0.221844	0.359729	0.173817	0.276741	-1.34102	2.01928	SLC27A2
cell morphogenesis involved in differentiation (GO:0000904)	0.237024	0.373987	0.185886	0.289828	-1.40185	2.01809	KIF14
regulation of cellular component movement (GO:0051270)	0.206366	0.348573	0.161572	0.266923	-1.25763	1.98468	ZSWIM6
substantia nigra development (GO:0021762)	0.194557	0.341772	0.152272	0.260543	-1.2117	1.98359	ERCC4
negative regulation of neuron differentiation (GO:0045665)	0.273703	0.400671	0.215307	0.307498	-1.52783	1.97963	SOX2
regulation of viral transcription (GO:0046782)	0.182575	0.33875	0.14287	0.259967	-1.1608	1.97405	NELFA
regulation of translational initiation (GO:0006446)	0.26651	0.396753	0.209507	0.303325	-1.47818	1.95467	DAZL
protein modification by small protein conjugation (GO:0032446)	0.132534	0.307082	0.059494	0.208672	-0.960793	1.94168	CAND1;OS9;CTR9;KLHL13
cellular response to UV (GO:0034644)	0.284362	0.40893	0.223928	0.313684	-1.53753	1.93346	ERCC4
monocarboxylic acid biosynthetic process (GO:0072330)	0.287881	0.40893	0.226781	0.313684	-1.54853	1.92825	SLC27A2
mitotic nuclear division (GO:0140014)	0.308636	0.417054	0.243684	0.32348	-1.63306	1.91982	CEP57L1
icosanoid metabolic process (GO:0006690)	0.206366	0.348573	0.161572	0.266923	-1.21297	1.91419	MGLL
rRNA metabolic process (GO:0016072)	0.258631	0.393583	0.169953	0.274381	-1.41424	1.91255	NOP58;C1D
regulation of epithelial cell proliferation (GO:0050678)	0.301785	0.414168	0.238091	0.319272	-1.58548	1.89947	SOX2
metaphase plate congression (GO:0051310)	0.198513	0.341883	0.155383	0.260786	-1.16731	1.88743	KIF14
regulation of T cell proliferation (GO:0042129)	0.26651	0.396753	0.209507	0.303325	-1.40736	1.86102	PNP
regulation of epidermal growth factor receptor signaling pathway (GO:0042058)	0.251911	0.385921	0.197782	0.296955	-1.34782	1.85822	SH3KBP1
telomere maintenance (GO:0000723)	0.225667	0.362581	0.17685	0.27988	-1.24782	1.85763	ERCC4
proteasome-mediated ubiquitin-dependent protein catabolic process (GO:0043161)	0.172607	0.33875	0.0932221	0.229685	-1.05732	1.85743	OS9;KIF14;FBXO15
ribonucleoprotein complex assembly (GO:0022618)	0.17968	0.33875	0.114909	0.245301	-1.0702	1.83709	CLP1;YTHDC1
double-strand break repair via homologous recombination (GO:0000724)	0.31542	0.424047	0.249238	0.328371	-1.57535	1.81772	ERCC4
response to light stimulus (GO:0009416)	0.251911	0.385921	0.197782	0.296955	-1.303	1.79642	ERCC4
peptidyl-serine modification (GO:0018209)	0.204482	0.348573	0.131884	0.258398	-1.13082	1.79492	CAB39;TDGF1
RNA modification (GO:0009451)	0.237024	0.373987	0.185886	0.289828	-1.24443	1.79147	NOP58
cellular response to light stimulus (GO:0071482)	0.280826	0.406581	0.221065	0.3115	-1.38229	1.75553	ERCC4
post-Golgi vesicle-mediated transport (GO:0006892)	0.251911	0.385921	0.197782	0.296955	-1.26825	1.74851	SCAMP1
fatty acid catabolic process (GO:0009062)	0.277273	0.402543	0.218191	0.309104	-1.35802	1.742	SLC27A2
positive regulation of response to stimulus (GO:0048584)	0.237024	0.373987	0.185886	0.289828	-1.19459	1.71972	ARG2
triglyceride metabolic process (GO:0006641)	0.229471	0.366459	0.179873	0.282964	-1.15949	1.70675	PLA2G16
iron ion homeostasis (GO:0055072)	0.270115	0.397627	0.212412	0.305017	-1.30148	1.70352	CAND1
integrin-mediated signaling pathway (GO:0007229)	0.251911	0.385921	0.197782	0.296955	-1.22767	1.69257	DST
regulation of cellular catabolic process (GO:0031329)	0.240773	0.378768	0.188876	0.293621	-1.18297	1.68443	LONP2
positive regulation of cell migration (GO:0030335)	0.296747	0.414168	0.197602	0.296955	-1.35377	1.64466	FGF1;TDGF1
rRNA processing (GO:0006364)	0.262263	0.393583	0.172556	0.276405	-1.22273	1.63651	NOP58;C1D
positive regulation of MAPK cascade (GO:0043410)	0.170202	0.337629	0.0917881	0.229685	-0.920078	1.62925	SOX2;FGF1;ROBO1
cellular response to DNA damage stimulus (GO:0006974)	0.219949	0.359729	0.122173	0.252491	-1.07084	1.62164	ATF2;BABAM2;ERCC4
positive regulation of cell morphogenesis involved in differentiation (GO:0010770)	0.251911	0.385921	0.197782	0.296955	-1.17202	1.61584	ROBO1
phosphate-containing compound metabolic process (GO:0006796)	0.227835	0.364952	0.14813	0.260543	-1.08201	1.60043	INPP4B;PLA2G16
recombinational repair (GO:0000725)	0.298334	0.414168	0.235279	0.318745	-1.31989	1.59646	ERCC4
phosphatidylcholine metabolic process (GO:0046470)	0.298334	0.414168	0.235279	0.318745	-1.30521	1.5787	PLA2G16
ncRNA processing (GO:0034470)	0.307601	0.417054	0.205609	0.300757	-1.33044	1.56852	NOP58;C1D
ubiquitin-dependent ERAD pathway (GO:0030433)	0.251911	0.385921	0.197782	0.296955	-1.13441	1.56399	OS9
regulation of tumor necrosis factor production (GO:0032680)	0.262886	0.393583	0.206592	0.300757	-1.16814	1.56068	ARG2
regulation of peptidyl-tyrosine phosphorylation (GO:0050730)	0.345143	0.441395	0.273737	0.345118	-1.45251	1.54518	TDGF1
positive regulation of T cell proliferation (GO:0042102)	0.262886	0.393583	0.206592	0.300757	-1.14281	1.52683	PNP
protein maturation (GO:0051604)	0.33865	0.438498	0.268362	0.34161	-1.40002	1.51592	LONP2
regulation of Ras protein signal transduction (GO:0046578)	0.3611	0.455482	0.287007	0.358301	-1.47533	1.50277	KIF14
organonitrogen compound biosynthetic process (GO:1901566)	0.224228	0.362479	0.145604	0.259967	-0.993832	1.48587	ARG2;RIMKLB
positive regulation of protein complex assembly (GO:0031334)	0.354764	0.450507	0.281728	0.353501	-1.42728	1.47909	ERCC4
regulation of neuron death (GO:1901214)	0.301785	0.414168	0.238091	0.319272	-1.23202	1.47601	KIF14
positive regulation of cell motility (GO:2000147)	0.220625	0.359729	0.143087	0.259967	-0.976322	1.47551	FGF1;TDGF1
homophilic cell adhesion via plasma membrane adhesion molecules (GO:0007156)	0.273703	0.400671	0.215307	0.307498	-1.13665	1.47277	ROBO1
response to reactive oxygen species (GO:0000302)	0.259246	0.393583	0.203666	0.300757	-1.0904	1.47202	GLRX2
RNA 3'-end processing (GO:0031123)	0.262886	0.393583	0.206592	0.300757	-1.09937	1.4688	CLP1
negative regulation of angiogenesis (GO:0016525)	0.291382	0.411685	0.229624	0.315135	-1.16413	1.43551	ATF2
negative regulation of dephosphorylation (GO:0035305)	0.270115	0.397627	0.212412	0.305017	-1.09172	1.42896	CSRNP3
regulation of myeloid cell differentiation (GO:0045637)	0.277273	0.402543	0.218191	0.309104	-1.11079	1.42486	CTR9
negative regulation of neuron apoptotic process (GO:0043524)	0.270115	0.397627	0.212412	0.305017	-1.07803	1.41105	KIF14
negative regulation of cell cycle G2/M phase transition (GO:1902750)	0.291382	0.411685	0.229624	0.315135	-1.13839	1.40377	BABAM2
termination of RNA polymerase II transcription (GO:0006369)	0.287881	0.40893	0.226781	0.313684	-1.12371	1.39925	CLP1
nucleic acid metabolic process (GO:0090304)	0.328791	0.429958	0.260225	0.336124	-1.25761	1.39888	HNRNPD
positive regulation of lymphocyte proliferation (GO:0050671)	0.298334	0.414168	0.235279	0.318745	-1.15453	1.39645	PNP
axonogenesis (GO:0007409)	0.300368	0.414168	0.200267	0.299831	-1.15657	1.39106	SH3KBP1;ROBO1
regulation of TOR signaling (GO:0032006)	0.284362	0.40893	0.223928	0.313684	-1.10614	1.39098	PREX2
regulation of intracellular signal transduction (GO:1902531)	0.343228	0.4401	0.204059	0.300757	-1.29602	1.38591	ARHGEF26;ERCC4;FGF1
mRNA 3'-end processing (GO:0031124)	0.308636	0.417054	0.243684	0.32348	-1.17369	1.37979	CLP1
negative regulation of phosphatase activity (GO:0010923)	0.287881	0.40893	0.226781	0.313684	-1.09779	1.36698	CSRNP3
fibroblast growth factor receptor signaling pathway (GO:0008543)	0.322138	0.429958	0.254751	0.333965	-1.194	1.35253	FGF1
nucleic acid phosphodiester bond hydrolysis (GO:0090305)	0.305219	0.417054	0.240893	0.322209	-1.13768	1.35011	ERCC4
SCF-dependent proteasomal ubiquitin-dependent protein catabolic process (GO:0031146)	0.301785	0.414168	0.238091	0.319272	-1.10412	1.32278	KIF14
positive regulation of vasculature development (GO:1904018)	0.403761	0.489154	0.32291	0.385744	-1.45129	1.31622	FGF1
ERBB signaling pathway (GO:0038127)	0.328791	0.429958	0.260225	0.336124	-1.18285	1.31572	IQGAP1
BMP signaling pathway (GO:0030509)	0.332094	0.433202	0.262947	0.338809	-1.1868	1.30825	TDGF1
phospholipid metabolic process (GO:0006644)	0.294867	0.414168	0.232456	0.317369	-1.07114	1.30811	PLA2G16
negative regulation of blood vessel morphogenesis (GO:2000181)	0.277273	0.402543	0.218191	0.309104	-1.01752	1.30523	ATF2
response to interferon-gamma (GO:0034341)	0.287881	0.40893	0.226781	0.313684	-1.04704	1.30379	TDGF1
positive regulation of DNA metabolic process (GO:0051054)	0.33538	0.436408	0.265659	0.339812	-1.18543	1.29508	BABAM2
negative regulation of developmental process (GO:0051093)	0.294867	0.414168	0.232456	0.317369	-1.05105	1.28357	ROBO1
regulation of phosphatase activity (GO:0010921)	0.301785	0.414168	0.238091	0.319272	-1.05876	1.26844	CSRNP3
activation of cysteine-type endopeptidase activity involved in apoptotic process (GO:0006919)	0.325473	0.429958	0.257493	0.335059	-1.12584	1.26373	ROBO1
proteasomal protein catabolic process (GO:0010498)	0.32562	0.429958	0.219034	0.309466	-1.11977	1.2564	KIF14;FBXO15
cellular response to BMP stimulus (GO:0071773)	0.351573	0.447533	0.279074	0.351007	-1.20085	1.2553	TDGF1
cellular response to lipopolysaccharide (GO:0071222)	0.364245	0.455955	0.289632	0.358301	-1.23749	1.24978	CTR9
regulation of G-protein coupled receptor protein signaling pathway (GO:0008277)	0.308636	0.417054	0.243684	0.32348	-1.05989	1.246	MGLL
steroid biosynthetic process (GO:0006694)	0.325473	0.429958	0.257493	0.335059	-1.10958	1.24547	SLC27A2
ubiquitin-dependent protein catabolic process (GO:0006511)	0.235434	0.373987	0.131939	0.258398	-0.856501	1.23878	OS9;KIF14;FBXO15
post-translational protein modification (GO:0043687)	0.256372	0.391617	0.145376	0.259967	-0.903863	1.23027	CAND1;FBXO15;KLHL13
positive regulation of signal transduction (GO:0009967)	0.269529	0.397627	0.177784	0.280516	-0.937204	1.22875	FGF1;ROBO1
negative regulation of neuron death (GO:1901215)	0.33865	0.438498	0.268362	0.34161	-1.12402	1.21707	KIF14
cellular transition metal ion homeostasis (GO:0046916)	0.370489	0.461578	0.294855	0.363057	-1.21641	1.20782	CAND1
regulation of defense response (GO:0031347)	0.312036	0.42057	0.246466	0.325533	-1.02172	1.18993	MGLL
mRNA metabolic process (GO:0016071)	0.382795	0.472443	0.305186	0.371439	-1.23154	1.1826	CLP1
response to calcium ion (GO:0051592)	0.325473	0.429958	0.257493	0.335059	-1.04688	1.1751	IQGAP1
positive regulation of T cell activation (GO:0050870)	0.287881	0.40893	0.226781	0.313684	-0.940758	1.17144	PNP
regulation of cell cycle G2/M phase transition (GO:1902749)	0.341904	0.439472	0.271054	0.342555	-1.07545	1.1542	KIF14
chromatin remodeling (GO:0006338)	0.438075	0.509637	0.352268	0.406226	-1.39824	1.15406	UBTFL1
RNA splicing (GO:0008380)	0.409621	0.491731	0.327892	0.387442	-1.27201	1.1353	PPIG
ribosome biogenesis (GO:0042254)	0.305794	0.417054	0.204272	0.300757	-0.954232	1.13062	NOP58;C1D
negative regulation of kinase activity (GO:0033673)	0.364245	0.455955	0.289632	0.358301	-1.11853	1.12964	PREX2
phosphatidylinositol biosynthetic process (GO:0006661)	0.385834	0.473974	0.307746	0.372832	-1.18483	1.12837	INPP4B
positive regulation of kinase activity (GO:0033674)	0.429684	0.503208	0.345048	0.400529	-1.32656	1.12055	IQGAP1
positive regulation of cellular protein metabolic process (GO:0032270)	0.364245	0.455955	0.289632	0.358301	-1.09791	1.10881	HNRNPD
regulation of protein serine/threonine kinase activity (GO:0071900)	0.328791	0.429958	0.260225	0.336124	-0.990567	1.10184	CAB39
ERAD pathway (GO:0036503)	0.318787	0.427483	0.251999	0.331181	-0.96371	1.10174	OS9
positive regulation of cell proliferation (GO:0008284)	0.345913	0.441395	0.205951	0.300757	-1.03255	1.09613	KIF14;FGF1;TDGF1
cellular response to molecule of bacterial origin (GO:0071219)	0.341904	0.439472	0.271054	0.342555	-1.00661	1.08032	CTR9
positive regulation of transcription from RNA polymerase II promoter (GO:0045944)	0.40312	0.489154	0.201003	0.300081	-1.18324	1.07499	SOX2;ATF2;CSRNP3;CTR9;FGF1
regulation of neuron differentiation (GO:0045664)	0.341904	0.439472	0.271054	0.342555	-0.996733	1.06972	SOX2
positive regulation of angiogenesis (GO:0045766)	0.40081	0.488951	0.320406	0.384633	-1.16536	1.06545	FGF1
protein processing (GO:0016485)	0.394863	0.482814	0.315369	0.379451	-1.11827	1.03912	LONP2
regulation of cysteine-type endopeptidase activity involved in apoptotic process (GO:0043281)	0.370489	0.461578	0.294855	0.363057	-1.03686	1.02953	SOX2
negative regulation of programmed cell death (GO:0043069)	0.324424	0.429958	0.190943	0.295962	-0.913569	1.02841	BABAM2;KIF14;TDGF1
regulation of neuron apoptotic process (GO:0043523)	0.35794	0.453448	0.284372	0.355972	-1.00063	1.02804	KIF14
cellular response to interferon-gamma (GO:0071346)	0.438075	0.509637	0.352268	0.406226	-1.23996	1.02342	TDGF1
negative regulation of hydrolase activity (GO:0051346)	0.415423	0.493168	0.332838	0.390071	-1.14348	1.00449	CSRNP3
regulation of cell motility (GO:2000145)	0.418303	0.493168	0.335298	0.390071	-1.14934	1.00171	KIF14
DNA repair (GO:0006281)	0.415094	0.493168	0.288281	0.358301	-1.13374	0.996844	BABAM2;ERCC4
response to tumor necrosis factor (GO:0034612)	0.382795	0.472443	0.305186	0.371439	-1.03706	0.995842	TDGF1
gene expression (GO:0010467)	0.328454	0.429958	0.193735	0.296955	-0.89308	0.994318	RBM39;CLP1;HNRNPD
circulatory system development (GO:0072359)	0.418303	0.493168	0.335298	0.390071	-1.13782	0.991661	TDGF1
DNA-templated transcription, termination (GO:0006353)	0.409621	0.491731	0.327892	0.387442	-1.1035	0.984897	CLP1
positive regulation of programmed cell death (GO:0043068)	0.361274	0.455482	0.2461	0.325533	-0.940107	0.95714	CSRNP3;ARHGEF26
fatty acid metabolic process (GO:0006631)	0.409621	0.491731	0.327892	0.387442	-1.06648	0.951859	SLC27A2
response to UV (GO:0009411)	0.385834	0.473974	0.307746	0.372832	-0.986112	0.93912	ERCC4
cellular response to metal ion (GO:0071248)	0.391868	0.480267	0.312837	0.378131	-0.998318	0.935254	IQGAP1
negative regulation of cell motility (GO:2000146)	0.382795	0.472443	0.305186	0.371439	-0.972026	0.933393	ROBO1
peptide metabolic process (GO:0006518)	0.403761	0.489154	0.32291	0.385744	-0.992891	0.900485	GLRX2
positive regulation of cysteine-type endopeptidase activity involved in apoptotic process (GO:0043280)	0.418303	0.493168	0.335298	0.390071	-1.03238	0.899772	ROBO1
response to endoplasmic reticulum stress (GO:0034976)	0.409621	0.491731	0.327892	0.387442	-1.00743	0.899159	OS9
positive regulation of apoptotic process (GO:0043065)	0.446975	0.518845	0.314067	0.378749	-1.11147	0.895015	CSRNP3;ARHGEF26
regulation of mRNA stability (GO:0043488)	0.470433	0.536811	0.380376	0.431093	-1.18277	0.891926	HNRNPD
transmembrane receptor protein serine/threonine kinase signaling pathway (GO:0007178)	0.510724	0.569031	0.415999	0.461539	-1.32496	0.890271	TDGF1
positive regulation of cell cycle process (GO:0090068)	0.412529	0.492977	0.33037	0.388627	-0.982278	0.869757	KIF14
negative regulation of protein kinase activity (GO:0006469)	0.418303	0.493168	0.335298	0.390071	-0.997151	0.869065	PREX2
positive regulation of neuron projection development (GO:0010976)	0.382795	0.472443	0.305186	0.371439	-0.887531	0.852256	ROBO1
DNA replication (GO:0006260)	0.449072	0.518994	0.361774	0.41537	-1.05552	0.845022	ERCC4
regulation of response to external stimulus (GO:0032101)	0.412529	0.492977	0.33037	0.388627	-0.929627	0.823137	MGLL
protein targeting (GO:0006605)	0.483365	0.547813	0.391731	0.442061	-1.12084	0.814835	LONP2
positive regulation of peptidyl-tyrosine phosphorylation (GO:0050731)	0.438075	0.509637	0.352268	0.406226	-0.980343	0.809141	TDGF1
macromolecular complex assembly (GO:0065003)	0.449072	0.518994	0.361774	0.41537	-1.00969	0.808329	DNAJB14
glycerophospholipid biosynthetic process (GO:0046474)	0.556846	0.606317	0.457712	0.497348	-1.31796	0.771621	INPP4B
negative regulation of cell differentiation (GO:0045596)	0.525038	0.57886	0.428832	0.471805	-1.17556	0.757395	CTR9
positive regulation of cellular biosynthetic process (GO:0031328)	0.545735	0.599172	0.447566	0.490368	-1.24478	0.753867	HNRNPD
regulation of signal transduction by p53 class mediator (GO:1901796)	0.495984	0.560909	0.402882	0.453673	-1.07196	0.751669	ERCC4
regulation of macromolecule metabolic process (GO:0060255)	0.473045	0.537273	0.382663	0.432755	-0.984716	0.737125	SOX2
regulation of G2/M transition of mitotic cell cycle (GO:0010389)	0.522682	0.578683	0.426713	0.470455	-1.13057	0.733494	KIF14
DNA metabolic process (GO:0006259)	0.45848	0.527552	0.323527	0.385744	-0.935484	0.729526	ERCC4;GLRX2
heart development (GO:0007507)	0.522682	0.578683	0.426713	0.470455	-1.12313	0.728666	TDGF1
positive regulation of transcription, DNA-templated (GO:0045893)	0.472481	0.537273	0.228228	0.314859	-0.966576	0.724697	SOX2;ATF2;CSRNP3;CTR9;HNRNPD;FGF1
transcription, DNA-templated (GO:0006351)	0.524514	0.57886	0.379515	0.431044	-1.10814	0.715063	CTR9;NELFA
positive regulation of macromolecule biosynthetic process (GO:0010557)	0.505859	0.566003	0.411658	0.458655	-1.04607	0.712893	HNRNPD
transcription from RNA polymerase II promoter (GO:0006366)	0.426882	0.50104	0.265335	0.339812	-0.83053	0.706987	CLP1;CTR9;NELFA
modification-dependent protein catabolic process (GO:0019941)	0.503408	0.565663	0.409476	0.458161	-1.02245	0.701763	OS9
negative regulation of cell migration (GO:0030336)	0.451788	0.52099	0.364128	0.417165	-0.87984	0.699069	ROBO1
positive regulation of cellular process (GO:0048522)	0.470601	0.536811	0.299399	0.367793	-0.903518	0.681022	KIF14;FGF1;TDGF1
response to lipopolysaccharide (GO:0032496)	0.536649	0.590426	0.439316	0.482332	-1.09208	0.679724	CTR9
positive regulation of protein kinase B signaling (GO:0051897)	0.467808	0.535946	0.37808	0.430342	-0.870831	0.661568	FGF1
negative regulation of multicellular organismal process (GO:0051241)	0.46252	0.531042	0.373463	0.426007	-0.855192	0.659408	ROBO1
negative regulation of canonical Wnt signaling pathway (GO:0090090)	0.520314	0.578492	0.424586	0.470077	-1.00434	0.656158	SOX2
cellular protein complex assembly (GO:0043623)	0.510724	0.569031	0.415999	0.461539	-0.958817	0.644253	CAND1
regulation of small GTPase mediated signal transduction (GO:0051056)	0.500945	0.564099	0.407286	0.45668	-0.930886	0.643482	ARHGEF26
negative regulation of Wnt signaling pathway (GO:0030178)	0.578265	0.625761	0.477457	0.51456	-1.14096	0.624927	SOX2
regulation of mitotic cell cycle phase transition (GO:1901990)	0.598659	0.643864	0.496497	0.531817	-1.21583	0.623797	KIF14
negative regulation of apoptotic process (GO:0043066)	0.426882	0.50104	0.265335	0.339812	-0.729975	0.621389	BABAM2;KIF14;TDGF1
cell-cell adhesion via plasma-membrane adhesion molecules (GO:0098742)	0.505859	0.566003	0.411658	0.458655	-0.888307	0.605379	ROBO1
neuron projection morphogenesis (GO:0048812)	0.554645	0.605172	0.455697	0.496183	-1.02159	0.602151	IQGAP1
regulation of cellular component organization (GO:0051128)	0.500945	0.564099	0.407286	0.45668	-0.800477	0.553336	KIF14
negative regulation of intracellular signal transduction (GO:1902532)	0.550212	0.602831	0.451646	0.493812	-0.921664	0.55065	PREX2
regulation of mitotic cell cycle (GO:0007346)	0.559035	0.607446	0.459719	0.498501	-0.879434	0.511429	IQGAP1
regulation of protein kinase B signaling (GO:0051896)	0.554645	0.605172	0.455697	0.496183	-0.863971	0.509247	FGF1
negative regulation of protein phosphorylation (GO:0001933)	0.586543	0.632123	0.485157	0.520728	-0.914852	0.488082	PREX2
apoptotic process (GO:0006915)	0.682171	0.716144	0.577247	0.600018	-1.21676	0.465378	GLRX2
regulation of MAPK cascade (GO:0043408)	0.634756	0.678532	0.530816	0.55948	-0.95611	0.434566	SOX2
cellular response to lipid (GO:0071396)	0.586543	0.632123	0.485157	0.520728	-0.810447	0.432381	CTR9
cellular response to tumor necrosis factor (GO:0071356)	0.618077	0.663394	0.514856	0.54814	-0.869776	0.418486	TDGF1
regulation of translation (GO:0006417)	0.652444	0.694622	0.547946	0.574091	-0.96391	0.411619	HNRNPD
regulation of inflammatory response (GO:0050727)	0.561214	0.608559	0.461718	0.499642	-0.702527	0.405817	MGLL
regulation of canonical Wnt signaling pathway (GO:0060828)	0.652444	0.694622	0.547946	0.574091	-0.900532	0.384554	SOX2
positive regulation of sequence-specific DNA binding transcription factor activity (GO:0051091)	0.655878	0.695469	0.551298	0.575315	-0.906209	0.382221	ATF2
regulation of transcription, DNA-templated (GO:0006355)	0.676401	0.711504	0.372302	0.425604	-0.942543	0.368505	SOX2;ATF2;UBTFL1;CTR9;HNRNPD;GPBP1L1;GLRX2
regulation of cell growth (GO:0001558)	0.631113	0.676009	0.527315	0.558022	-0.797015	0.366842	KIF14
regulation of cell cycle (GO:0051726)	0.655878	0.695469	0.551298	0.575315	-0.868382	0.366266	IQGAP1
positive regulation of nucleic acid-templated transcription (GO:1903508)	0.710032	0.740964	0.556012	0.579087	-1.05794	0.362288	SOX2;HNRNPD
inflammatory response (GO:0006954)	0.713685	0.743304	0.609082	0.631862	-1.06007	0.357575	MGLL
protein deubiquitination (GO:0016579)	0.72072	0.749151	0.616308	0.638102	-1.09154	0.357483	BABAM2
nervous system development (GO:0007399)	0.657859	0.696022	0.502948	0.537634	-0.844307	0.353566	PRPS1;ROBO1
positive regulation of intracellular signal transduction (GO:1902533)	0.685371	0.718072	0.530533	0.55948	-0.871606	0.329289	SOX2;FGF1
positive regulation of macromolecule metabolic process (GO:0010604)	0.745928	0.764793	0.64259	0.657563	-1.04841	0.307316	ATF2
cellular response to cytokine stimulus (GO:0071345)	0.659042	0.696022	0.504117	0.537793	-0.702793	0.293042	SOX2;TDGF1
positive regulation of gene expression (GO:0010628)	0.734722	0.760121	0.544739	0.573009	-0.948724	0.292456	SOX2;ATF2;HNRNPD
protein phosphorylation (GO:0006468)	0.675269	0.711504	0.520306	0.551713	-0.737538	0.28959	CAB39;TDGF1
proteolysis (GO:0006508)	0.764226	0.779008	0.662084	0.673588	-1.04337	0.280554	LONP2
Golgi vesicle transport (GO:0048193)	0.739521	0.762316	0.63585	0.653203	-0.920883	0.277879	SCAMP1
protein modification by small protein removal (GO:0070646)	0.726225	0.753387	0.621994	0.641469	-0.852294	0.272645	BABAM2
regulation of programmed cell death (GO:0043067)	0.735601	0.760121	0.631746	0.650255	-0.862145	0.264737	RBM25
protein polyubiquitination (GO:0000209)	0.754635	0.770722	0.651821	0.664429	-0.923864	0.260087	FBXO15
protein transport (GO:0015031)	0.802004	0.814366	0.703604	0.713076	-1.14334	0.252269	SCAMP1
regulation of cell proliferation (GO:0042127)	0.70875	0.740964	0.516715	0.54901	-0.724183	0.249302	KIF14;FGF1;TDGF1
cellular response to oxygen-containing compound (GO:1901701)	0.743384	0.763671	0.639909	0.656093	-0.808606	0.239786	CTR9
regulation of transcription from RNA polymerase II promoter (GO:0006357)	0.740618	0.762316	0.463693	0.500751	-0.757522	0.227461	SOX2;ATF2;CSRNP3;CTR9;FGF1;TDGF1
MAPK cascade (GO:0000165)	0.748446	0.765886	0.645252	0.659007	-0.764666	0.221567	FGF1
negative regulation of cell proliferation (GO:0008285)	0.835435	0.845056	0.742054	0.749162	-1.04785	0.188406	SOX2
cellular macromolecule biosynthetic process (GO:0034645)	0.838696	0.84673	0.745905	0.75161	-1.04967	0.184643	ERCC4
negative regulation of transcription from RNA polymerase II promoter (GO:0000122)	0.769494	0.782864	0.620844	0.641469	-0.674795	0.176811	SOX2;CTR9
cytokine-mediated signaling pathway (GO:0019221)	0.821617	0.832677	0.682606	0.693128	-0.868531	0.17065	SOX2;CTR9
transmembrane transport (GO:0055085)	0.847338	0.853818	0.756207	0.760537	-0.88395	0.146431	OS9
transmembrane receptor protein tyrosine kinase signaling pathway (GO:0007169)	0.860501	0.865427	0.772188	0.77513	-0.959021	0.144084	FGF1
cellular protein modification process (GO:0006464)	0.874722	0.878055	0.721455	0.729763	-0.979574	0.131115	CAND1;FBXO15;KLHL13
negative regulation of transcription, DNA-templated (GO:0045892)	0.912626	0.914361	0.807811	0.809347	-0.887282	0.0811238	SOX2;CTR9
negative regulation of cellular process (GO:0048523)	0.930314	0.930314	0.864926	0.864926	-0.86011	0.0621286	CAB39

## Sheet: Cluster4-Molecular Function
Term	P-value	Adjusted P-value	Old P-value	Old Adjusted P-value	Z-score	Combined Score	Genes
uridylyltransferase activity (GO:0070569)	0.0338049	0.278278	0.0308776	0.230291	-4.35922	14.7653	UAP1
phosphatidylinositol phosphate 4-phosphatase activity (GO:0034596)	0.0385409	0.278278	0.0346712	0.230291	-3.80782	12.3984	INPP4B
single-stranded DNA endodeoxyribonuclease activity (GO:0000014)	0.0385409	0.278278	0.0346712	0.230291	-3.54846	11.5539	ERCC4
histone methyltransferase binding (GO:1990226)	0.0338049	0.278278	0.0308776	0.230291	-3.26497	11.0589	CBX1
cAMP response element binding (GO:0035497)	0.0385409	0.278278	0.0346712	0.230291	-2.95746	9.62959	ATF2
very long-chain fatty acid-CoA ligase activity (GO:0031957)	0.0338049	0.278278	0.0308776	0.230291	-2.82094	9.55495	SLC27A2
N6-methyladenosine-containing RNA binding (GO:1990247)	0.0385409	0.278278	0.0346712	0.230291	-2.8272	9.20546	YTHDC1
phosphate ion binding (GO:0042301)	0.0479441	0.278278	0.0422147	0.230291	-2.99296	9.09179	PNP
cAMP response element binding protein binding (GO:0008140)	0.0432539	0.278278	0.0384502	0.230291	-2.83594	8.90674	ATF2
long-chain fatty acid-CoA ligase activity (GO:0004467)	0.0526115	0.278278	0.0459649	0.230291	-3.01636	8.88265	SLC27A2
protein serine/threonine kinase activator activity (GO:0043539)	0.0107127	0.278278	0.00775215	0.230291	-1.95397	8.86385	CAB39;IQGAP1
activin receptor binding (GO:0070697)	0.0432539	0.278278	0.0384502	0.230291	-2.71776	8.53558	TDGF1
inositol trisphosphate phosphatase activity (GO:0046030)	0.0526115	0.278278	0.0459649	0.230291	-2.84665	8.38287	INPP4B
hydrolase activity, acting on carbon-nitrogen (but not peptide) bonds, in linear amidines (GO:0016813)	0.0526115	0.278278	0.0459649	0.230291	-2.82692	8.32477	ARG2
peptide disulfide oxidoreductase activity (GO:0015037)	0.0479441	0.278278	0.0422147	0.230291	-2.7273	8.28476	GLRX2
acylglycerol lipase activity (GO:0047372)	0.0572563	0.278278	0.0497007	0.230291	-2.59456	7.42101	MGLL
microtubule plus-end binding (GO:0051010)	0.0618785	0.278278	0.0534221	0.230291	-2.64972	7.37306	DST
LRR domain binding (GO:0030275)	0.0710557	0.278278	0.0608224	0.230291	-2.72879	7.2157	ROBO1
fibroblast growth factor receptor binding (GO:0005104)	0.0618785	0.278278	0.0534221	0.230291	-2.49719	6.94863	FGF1
endoribonuclease activity, producing 3'-phosphomonoesters (GO:0016892)	0.0338049	0.278278	0.0308776	0.230291	-2.04051	6.91153	TSEN2
tumor necrosis factor receptor binding (GO:0005164)	0.0572563	0.278278	0.0497007	0.230291	-2.39039	6.83705	BABAM2
RNA polymerase II basal transcription factor binding (GO:0001091)	0.0618785	0.278278	0.0534221	0.230291	-2.4402	6.79007	NOP58
phosphatidylcholine 1-acylhydrolase activity (GO:0008970)	0.0526115	0.278278	0.0459649	0.230291	-2.29274	6.75172	PLA2G16
RNA binding (GO:0003723)	0.00761957	0.278278	0.000637297	0.0796621	-1.37251	6.69378	RBM39;AQR;NOP58;RBM25;YTHDC1;PRPF40A;ZCCHC17;DAZL;SOX2;C1D;CWC22;HNRNPD;L1TD1;PPIG
GTPase inhibitor activity (GO:0005095)	0.0664783	0.278278	0.0571294	0.230291	-2.44871	6.63816	IQGAP1
tRNA-specific ribonuclease activity (GO:0004549)	0.0664783	0.278278	0.0571294	0.230291	-2.43276	6.59492	TSEN2
Rac guanyl-nucleotide exchange factor activity (GO:0030676)	0.0710557	0.278278	0.0608224	0.230291	-2.34245	6.19412	PREX2
nucleotidyltransferase activity (GO:0016779)	0.0801441	0.278278	0.068166	0.230291	-2.10254	5.30667	UAP1
lysophospholipase activity (GO:0004622)	0.0936119	0.298956	0.0790764	0.240364	-2.23411	5.2917	MGLL
fatty acid ligase activity (GO:0015645)	0.0891445	0.298956	0.0754536	0.240364	-2.13887	5.1707	SLC27A2
protein kinase activator activity (GO:0030295)	0.030835	0.278278	0.0215282	0.230291	-1.44585	5.03026	CAB39;IQGAP1
Rho guanyl-nucleotide exchange factor activity (GO:0005089)	0.034998	0.278278	0.0243868	0.230291	-1.41809	4.75409	PREX2;ARHGEF26
Hsp70 protein binding (GO:0030544)	0.128579	0.329538	0.107564	0.263636	-2.28202	4.68089	DNAJB14
acid-thiol ligase activity (GO:0016878)	0.0801441	0.278278	0.068166	0.230291	-1.83384	4.62849	SLC27A2
miRNA binding (GO:0035198)	0.115626	0.329538	0.0969834	0.263636	-2.0878	4.50421	SOX2
growth factor activity (GO:0008083)	0.0462798	0.278278	0.0321637	0.230291	-1.42266	4.3719	FGF1;TDGF1
enhancer binding (GO:0035326)	0.124282	0.329538	0.10405	0.263636	-1.96303	4.0933	ATF2
protein disulfide isomerase activity (GO:0003756)	0.0980576	0.298956	0.0826853	0.240364	-1.73625	4.03191	GLRX2
intramolecular oxidoreductase activity, transposing S-S bonds (GO:0016864)	0.0980576	0.298956	0.0826853	0.240364	-1.73497	4.02894	GLRX2
transmembrane receptor protein serine/threonine kinase binding (GO:0070696)	0.0801441	0.278278	0.068166	0.230291	-1.5861	4.0032	TDGF1
kinase activator activity (GO:0019209)	0.115626	0.329538	0.0969834	0.263636	-1.74672	3.76837	CAB39
carboxylic ester hydrolase activity (GO:0052689)	0.0923623	0.298956	0.0644532	0.230291	-1.55284	3.69893	PLA2G16;MGLL
phospholipase activity (GO:0004620)	0.0462798	0.278278	0.0321637	0.230291	-1.14767	3.52685	PLA2G16;MGLL
deoxyribonuclease activity (GO:0004536)	0.141345	0.329538	0.118023	0.268233	-1.78165	3.48588	ERCC4
manganese ion binding (GO:0030145)	0.162211	0.332399	0.135189	0.277026	-1.91014	3.47427	ARG2
nucleobase-containing compound kinase activity (GO:0019205)	0.141345	0.329538	0.118023	0.268233	-1.77423	3.47138	CLP1
integrin binding (GO:0005178)	0.0791668	0.278278	0.0551183	0.230291	-1.33248	3.37943	DST;FGF1
telomeric DNA binding (GO:0042162)	0.149752	0.329538	0.124929	0.269243	-1.75974	3.34134	HNRNPD
phospholipase A2 activity (GO:0004623)	0.141345	0.329538	0.118023	0.268233	-1.68645	3.29963	PLA2G16
basal RNA polymerase II transcription machinery binding (GO:0001099)	0.128579	0.329538	0.107564	0.263636	-1.6049	3.29199	CTR9
snoRNA binding (GO:0030515)	0.141345	0.329538	0.118023	0.268233	-1.67382	3.27491	NOP58
tumor necrosis factor receptor superfamily binding (GO:0032813)	0.124282	0.329538	0.10405	0.263636	-1.56416	3.26158	BABAM2
peptidyl-prolyl cis-trans isomerase activity (GO:0003755)	0.174489	0.338147	0.145331	0.28121	-1.79007	3.12527	PPIG
ATP-dependent microtubule motor activity, plus-end-directed (GO:0008574)	0.145559	0.329538	0.121482	0.269243	-1.61474	3.11189	KIF14
RNA polymerase core enzyme binding (GO:0043175)	0.158078	0.332399	0.131782	0.277026	-1.63204	3.01057	CTR9
endodeoxyribonuclease activity (GO:0004520)	0.162211	0.332399	0.135189	0.277026	-1.63248	2.96924	ERCC4
3'-5' exonuclease activity (GO:0008408)	0.174489	0.338147	0.145331	0.28121	-1.68791	2.94691	ERCC4
RNA polymerase II core binding (GO:0000993)	0.124282	0.329538	0.10405	0.263636	-1.40937	2.93881	CTR9
phosphatidylinositol-3,4,5-trisphosphate binding (GO:0005547)	0.149752	0.329538	0.124929	0.269243	-1.52202	2.88997	IQGAP1
ATP binding (GO:0005524)	0.131014	0.329538	0.0802526	0.240364	-1.39704	2.83942	PRPS1;CLP1;KIF14
polyubiquitin modification-dependent protein binding (GO:0031593)	0.194557	0.34253	0.161977	0.28121	-1.72614	2.82575	BABAM2
signal sequence binding (GO:0005048)	0.178542	0.338147	0.148686	0.28121	-1.56298	2.69291	BABAM2
RNA polymerase II distal enhancer sequence-specific DNA binding (GO:0000980)	0.229471	0.367742	0.191145	0.306321	-1.82549	2.68708	ATF2
microtubule binding (GO:0008017)	0.0718034	0.278278	0.0425513	0.230291	-0.990795	2.60958	DST;CEP57L1;KIF14
phosphatidylinositol kinase activity (GO:0052742)	0.225667	0.366343	0.187953	0.305119	-1.74894	2.60364	FGF1
peptide-lysine-N-acetyltransferase activity (GO:0061733)	0.178542	0.338147	0.148686	0.28121	-1.50976	2.60122	ATF2
exonuclease activity (GO:0004527)	0.166323	0.33533	0.138582	0.2794	-1.43468	2.57356	ERCC4
transferase activity, transferring pentosyl groups (GO:0016763)	0.190583	0.34253	0.158673	0.28121	-1.50428	2.49359	PNP
histone acetyltransferase activity (GO:0004402)	0.186588	0.34253	0.155357	0.28121	-1.46593	2.46107	ATF2
kinase binding (GO:0019900)	0.150269	0.329538	0.0824657	0.240364	-1.27721	2.42074	ATF2;CAB39;KIF14;IQGAP1
damaged DNA binding (GO:0003684)	0.206366	0.353366	0.171812	0.290223	-1.53041	2.41515	ERCC4
RNA polymerase II activating transcription factor binding (GO:0001102)	0.210264	0.355175	0.175065	0.291775	-1.51366	2.36039	ATF2
lipase activity (GO:0016298)	0.194557	0.34253	0.161977	0.28121	-1.40668	2.30278	MGLL
single-stranded RNA binding (GO:0003727)	0.202449	0.351474	0.168546	0.288607	-1.37205	2.19153	L1TD1
activating transcription factor binding (GO:0033613)	0.287881	0.418431	0.240566	0.345641	-1.75656	2.18728	ATF2
ATP-dependent microtubule motor activity (GO:1990939)	0.214143	0.356905	0.178306	0.293266	-1.41014	2.17319	KIF14
adenyl ribonucleotide binding (GO:0032559)	0.158333	0.332399	0.0983574	0.263636	-1.14977	2.11908	PRPS1;CLP1;KIF14
1-phosphatidylinositol-3-kinase activity (GO:0016303)	0.194557	0.34253	0.161977	0.28121	-1.24286	2.03459	FGF1
microtubule motor activity (GO:0003777)	0.259246	0.407296	0.216236	0.336022	-1.44916	1.95634	KIF14
mRNA 3'-UTR binding (GO:0003730)	0.270115	0.407296	0.225448	0.336022	-1.45538	1.90496	DAZL
transcription factor activity, RNA polymerase II distal enhancer sequence-specific binding (GO:0003705)	0.273703	0.407296	0.228495	0.336022	-1.36136	1.76393	ATF2
ATPase binding (GO:0051117)	0.270115	0.407296	0.225448	0.336022	-1.31542	1.72176	NOP58
phosphatidylinositol-4,5-bisphosphate 3-kinase activity (GO:0046934)	0.287881	0.418431	0.240566	0.345641	-1.35042	1.68156	FGF1
enhancer sequence-specific DNA binding (GO:0001158)	0.273703	0.407296	0.228495	0.336022	-1.24102	1.608	ATF2
endonuclease activity (GO:0004519)	0.305219	0.433023	0.255396	0.358702	-1.329	1.57716	ERCC4
single-stranded DNA binding (GO:0003697)	0.351573	0.467517	0.295429	0.386452	-1.46846	1.53504	ERCC4
PDZ domain binding (GO:0030165)	0.26651	0.407296	0.222389	0.336022	-1.13656	1.50292	KIF14
phosphatidylinositol phosphate binding (GO:1901981)	0.332094	0.456173	0.278537	0.374377	-1.35694	1.49581	IQGAP1
mRNA binding (GO:0003729)	0.220625	0.36287	0.158935	0.28121	-0.951724	1.43833	DAZL;RBM25
growth factor receptor binding (GO:0070851)	0.367375	0.473421	0.30921	0.391323	-1.43461	1.43658	FGF1
purine ribonucleoside triphosphate binding (GO:0035639)	0.308313	0.433023	0.205291	0.324828	-1.21859	1.43384	PRPS1;CLP1;KIF14
GTPase activator activity (GO:0005096)	0.347085	0.466512	0.258896	0.359578	-1.26547	1.33911	PREX2;IQGAP1
phosphatidylinositol 3-kinase activity (GO:0035004)	0.31542	0.438083	0.264158	0.362854	-1.14813	1.32477	FGF1
motor activity (GO:0003774)	0.345143	0.466512	0.289842	0.385428	-1.2338	1.31251	KIF14
phosphatidylinositol bisphosphate kinase activity (GO:0052813)	0.298334	0.428641	0.249499	0.354401	-1.0211	1.23506	FGF1
protein phosphatase binding (GO:0019903)	0.367375	0.473421	0.30921	0.391323	-1.15984	1.16144	IQGAP1
protease binding (GO:0002020)	0.443601	0.543628	0.376731	0.46168	-1.1684	0.949713	LONP2
GTPase regulator activity (GO:0030695)	0.392773	0.500986	0.296795	0.386452	-1.01009	0.943954	PREX2;IQGAP1
protein kinase regulator activity (GO:0019887)	0.412529	0.515661	0.348991	0.431919	-1.04601	0.926189	CAB39
phosphatase binding (GO:0019902)	0.397844	0.502328	0.335986	0.419983	-0.901065	0.830508	IQGAP1
tubulin binding (GO:0015631)	0.357737	0.470706	0.267644	0.363646	-0.806417	0.828962	CEP57L1;KIF14
RNA polymerase II transcription factor binding (GO:0001085)	0.451788	0.548287	0.384093	0.466133	-0.855583	0.679796	ATF2
protein kinase binding (GO:0019901)	0.439877	0.543628	0.309928	0.391323	-0.785582	0.645168	ATF2;KIF14;IQGAP1
ATPase activity (GO:0016887)	0.634756	0.727931	0.555449	0.636983	-1.39901	0.635868	KIF14
protein tyrosine kinase activity (GO:0004713)	0.517934	0.622517	0.444441	0.529096	-0.938363	0.617356	FGF1
RNA polymerase II regulatory region DNA binding (GO:0001012)	0.631113	0.727931	0.551888	0.636983	-1.21323	0.558416	ATF2
transcription regulatory region DNA binding (GO:0044212)	0.551141	0.65612	0.436635	0.524802	-0.895766	0.533666	SOX2;ATF2
sequence-specific DNA binding (GO:0043565)	0.579497	0.683369	0.463263	0.546301	-0.915976	0.499753	SOX2;HNRNPD
ubiquitin-protein transferase activity (GO:0004842)	0.61048	0.713178	0.493001	0.575936	-0.74146	0.365917	FBXO15;KLHL13
regulatory region DNA binding (GO:0000975)	0.670922	0.762412	0.591216	0.671836	-0.814273	0.324978	SOX2
calcium ion binding (GO:0005509)	0.755855	0.817733	0.678604	0.735874	-1.135	0.317693	IQGAP1
phosphotransferase activity, alcohol group as acceptor (GO:0016773)	0.71652	0.80497	0.637476	0.711469	-0.871361	0.290468	CLP1
transcription coactivator activity (GO:0003713)	0.764226	0.817733	0.687524	0.735874	-1.00998	0.271576	ATF2
transcriptional activator activity, RNA polymerase II transcription regulatory region sequence-specific binding (GO:0001228)	0.755855	0.817733	0.678604	0.735874	-0.913259	0.255627	ATF2
cadherin binding (GO:0045296)	0.788728	0.835517	0.714009	0.756365	-1.07471	0.255064	IQGAP1
protein kinase activity (GO:0004672)	0.721253	0.80497	0.605749	0.68215	-0.734803	0.240108	CAB39;FGF1
G-protein coupled receptor activity (GO:0004930)	0.734281	0.812258	0.655894	0.725547	-0.720797	0.222628	PDGFRL
transcription regulatory region sequence-specific DNA binding (GO:0000976)	0.765398	0.817733	0.688778	0.735874	-0.757937	0.202641	ATF2
protein homodimerization activity (GO:0042803)	0.841711	0.876782	0.744138	0.781658	-1.14298	0.196957	PRPS1;MGLL
protein serine/threonine kinase activity (GO:0004674)	0.839501	0.876782	0.770987	0.803111	-0.833812	0.145873	CAB39
transition metal ion binding (GO:0046914)	0.862582	0.891098	0.798041	0.824423	-0.699639	0.103424	ARG2
RNA polymerase II regulatory region sequence-specific DNA binding (GO:0000977)	0.898831	0.90608	0.842463	0.849258	-0.966824	0.103121	ATF2
nucleoside-triphosphatase activity (GO:0017111)	0.878777	0.900386	0.81756	0.837664	-0.75888	0.0980658	KIF14
metal ion binding (GO:0046872)	0.889253	0.903712	0.830458	0.843961	-0.72418	0.0849999	IQGAP1
DNA binding (GO:0003677)	0.937232	0.937232	0.875578	0.875578	-0.721328	0.0467594	SOX2;ERCC4

## Sheet: Cluster4-Cellular Component
Term	P-value	Adjusted P-value	Old P-value	Old Adjusted P-value	Z-score	Combined Score	Genes
endoribonuclease complex (GO:1902555)	0.00208127	0.105075	0.00226147	0.0882747	-2.68017	16.5494	CLP1;TSEN2
protein kinase complex (GO:1902911)	0.0338049	0.280865	0.0353424	0.266289	-3.97563	13.466	CAB39
Cdc73/Paf1 complex (GO:0016593)	0.0432539	0.280865	0.0439861	0.266289	-3.4511	10.8388	CTR9
U2-type catalytic step 2 spliceosome (GO:0071007)	0.00945503	0.203578	0.0089343	0.164391	-2.19987	10.254	AQR;CWC22
pre-snoRNP complex (GO:0070761)	0.0338049	0.280865	0.0353424	0.266289	-3.00924	10.1927	NOP58
box C/D snoRNP complex (GO:0031428)	0.0338049	0.280865	0.0353424	0.266289	-2.75546	9.33317	NOP58
U2-type spliceosomal complex (GO:0005684)	0.00334223	0.105075	0.00287852	0.0882747	-1.53096	8.72819	AQR;CWC22;PRPF40A
small nucleolar ribonucleoprotein complex (GO:0005732)	0.0618785	0.280865	0.0610475	0.266289	-2.96173	8.24127	NOP58
ficolin-1-rich granule lumen (GO:1904813)	0.0230968	0.280865	0.0189759	0.246342	-2.17219	8.18494	CAND1;PNP;CAB39
nuclear speck (GO:0016607)	0.00342636	0.105075	0.00210742	0.0882747	-1.3916	7.89907	RBM39;RBM25;YTHDC1;CWC22;PRPF40A;PPIG
integral component of peroxisomal membrane (GO:0005779)	0.0710557	0.280865	0.0694667	0.266289	-2.54153	6.72055	SLC27A2
nuclear exosome (RNase complex) (GO:0000176)	0.0618785	0.280865	0.0610475	0.266289	-2.40805	6.70059	C1D
microtubule plus-end (GO:0035371)	0.0710557	0.280865	0.0694667	0.266289	-2.39428	6.33116	DST
nuclear body (GO:0016604)	0.011064	0.203578	0.00583187	0.134133	-1.39939	6.30295	RBM39;NOP58;RBM25;YTHDC1;CWC22;PRPF40A;NELFA;PPIG
Cul2-RING ubiquitin ligase complex (GO:0031462)	0.075611	0.280865	0.0736486	0.271027	-2.39982	6.19671	ZSWIM6
mitochondrial outer membrane (GO:0005741)	0.0194098	0.280865	0.0159726	0.244913	-1.50327	5.92585	ATF2;FUNDC1;TOMM6
cytoplasmic vesicle lumen (GO:0060205)	0.0260947	0.280865	0.021421	0.246342	-1.46598	5.34498	CAND1;PNP;CAB39
U1 snRNP (GO:0005685)	0.102482	0.29247	0.0983583	0.277119	-2.34604	5.34443	PRPF40A
U2-type prespliceosome (GO:0071004)	0.0891445	0.29247	0.0860848	0.277119	-2.13431	5.15969	PRPF40A
microtubule cytoskeleton (GO:0015630)	0.0424855	0.280865	0.0302075	0.266289	-1.53102	4.83586	RBM39;DST;CBX1;KIF14;IQGAP1
peroxisomal part (GO:0044439)	0.0536028	0.280865	0.0475545	0.266289	-1.63842	4.79428	LONP2;SLC27A2
nuclear heterochromatin (GO:0005720)	0.0980576	0.29247	0.0942851	0.277119	-2.05927	4.78204	CBX1
chromosomal region (GO:0098687)	0.054861	0.280865	0.0486542	0.266289	-1.54996	4.49947	ERCC4;CBX1
microtubule end (GO:1990752)	0.106884	0.29247	0.102414	0.277119	-1.98461	4.43759	DST
transcriptionally active chromatin (GO:0035327)	0.106884	0.29247	0.102414	0.277119	-1.95352	4.36807	CTR9
serine/threonine protein kinase complex (GO:1902554)	0.119965	0.306576	0.114473	0.284637	-2.01677	4.27668	CAB39
specific granule membrane (GO:0035579)	0.0749123	0.280865	0.0662122	0.266289	-1.61946	4.19674	SCAMP1;SLC27A2
microbody (GO:0042579)	0.0763221	0.280865	0.0674492	0.266289	-1.60715	4.13486	PLA2G16;LONP2
cullin-RING ubiquitin ligase complex (GO:0031461)	0.0602406	0.280865	0.0495198	0.266289	-1.46161	4.10625	CAND1;ZSWIM6;KLHL13
intrinsic component of mitochondrial outer membrane (GO:0031306)	0.106884	0.29247	0.102414	0.277119	-1.80473	4.03539	FUNDC1
integral component of mitochondrial outer membrane (GO:0031307)	0.102482	0.29247	0.0983583	0.277119	-1.75519	3.99844	FUNDC1
prespliceosome (GO:0071010)	0.111266	0.29247	0.106451	0.279815	-1.81245	3.97983	PRPF40A
peroxisome (GO:0005777)	0.0763221	0.280865	0.0674492	0.266289	-1.52004	3.91075	PLA2G16;LONP2
ficolin-1-rich granule (GO:0101002)	0.0626384	0.280865	0.0515108	0.266289	-1.14918	3.18365	CAND1;PNP;CAB39
small-subunit processome (GO:0032040)	0.162211	0.355319	0.153543	0.330993	-1.59649	2.90379	NOP58
site of double-strand break (GO:0035861)	0.158078	0.354712	0.149713	0.330993	-1.51151	2.78823	ATF2
nuclear chromosome, telomeric region (GO:0000784)	0.0984198	0.29247	0.0868883	0.277119	-1.19318	2.76641	ERCC4;CBX1
Cajal body (GO:0015030)	0.158078	0.354712	0.149713	0.330993	-1.48844	2.74568	NOP58
peroxisomal matrix (GO:0005782)	0.190583	0.357829	0.179887	0.330993	-1.5659	2.59575	LONP2
spindle midzone (GO:0051233)	0.141345	0.342203	0.134223	0.316629	-1.3194	2.58147	KIF14
spliceosomal complex (GO:0005681)	0.109279	0.29247	0.0964767	0.277119	-1.07533	2.38061	RBM25;CWC22
chromosome, centromeric region (GO:0000775)	0.218003	0.385088	0.205432	0.356103	-1.53653	2.34052	CBX1
site of DNA damage (GO:0090734)	0.170416	0.357829	0.161153	0.330993	-1.32243	2.34006	ATF2
heterochromatin (GO:0000792)	0.186588	0.357829	0.176173	0.330993	-1.35504	2.27491	CBX1
microbody lumen (GO:0031907)	0.190583	0.357829	0.179887	0.330993	-1.32325	2.19351	LONP2
nuclear ubiquitin ligase complex (GO:0000152)	0.186588	0.357829	0.176173	0.330993	-1.27364	2.13825	BABAM2
peroxisomal membrane (GO:0005778)	0.182575	0.357829	0.172443	0.330993	-1.23157	2.09441	SLC27A2
chromosome, telomeric region (GO:0000781)	0.125306	0.311572	0.110672	0.282829	-0.994155	2.06486	ERCC4;CBX1
endoplasmic reticulum lumen (GO:0005788)	0.147885	0.348858	0.123716	0.299524	-1.04856	2.00413	OS9;P4HA2;SLC27A2
kinesin complex (GO:0005871)	0.221844	0.385088	0.209017	0.356103	-1.2686	1.91024	KIF14
specific granule (GO:0042581)	0.18672	0.357829	0.165574	0.330993	-1.12352	1.88543	SCAMP1;SLC27A2
spliceosomal snRNP complex (GO:0097525)	0.255587	0.405414	0.240584	0.381616	-1.37088	1.87014	PRPF40A
recycling endosome membrane (GO:0055038)	0.210264	0.379299	0.198214	0.356103	-1.14307	1.78249	SCAMP1
nuclear matrix (GO:0016363)	0.255587	0.405414	0.240584	0.381616	-1.25496	1.712	PRPF40A
actin filament (GO:0005884)	0.240773	0.401684	0.226709	0.378187	-1.10937	1.57963	IQGAP1
integral component of mitochondrial membrane (GO:0032592)	0.244504	0.401684	0.230201	0.378187	-1.07075	1.50818	FUNDC1
secretory granule lumen (GO:0034774)	0.204693	0.376635	0.173256	0.330993	-0.924476	1.46644	CAND1;PNP;CAB39
ribonucleoprotein granule (GO:0035770)	0.328791	0.458315	0.309542	0.431482	-1.24372	1.38342	IQGAP1
Cul3-RING ubiquitin ligase complex (GO:0031463)	0.294867	0.435663	0.277502	0.410013	-1.09541	1.33776	KLHL13
spindle (GO:0005819)	0.233255	0.397397	0.207721	0.356103	-0.837856	1.2196	CBX1;KIF14
coated vesicle (GO:0030135)	0.298334	0.435663	0.28077	0.410013	-0.982144	1.18794	SCAMP1
preribosome (GO:0030684)	0.312036	0.448552	0.293699	0.422192	-0.936438	1.09061	NOP58
nuclear periphery (GO:0034399)	0.322138	0.45595	0.303246	0.42921	-0.916368	1.03804	PRPF40A
cytoplasmic vesicle (GO:0031410)	0.285869	0.435663	0.255953	0.392462	-0.791659	0.991331	DST;SH3KBP1
microtubule (GO:0005874)	0.276793	0.43161	0.247589	0.386071	-0.750167	0.963577	KIF14;IQGAP1
chromosome (GO:0005694)	0.382795	0.517899	0.36086	0.488222	-0.971669	0.93305	ERCC4
DNA-directed RNA polymerase II, holoenzyme (GO:0016591)	0.3611	0.495839	0.340196	0.467134	-0.912993	0.929975	CTR9
polymeric cytoskeletal fiber (GO:0099513)	0.296747	0.435663	0.266003	0.401184	-0.74257	0.902131	KIF14;IQGAP1
clathrin-coated vesicle (GO:0030136)	0.391868	0.522491	0.369522	0.492696	-0.90793	0.850575	SCAMP1
membrane raft (GO:0045121)	0.446343	0.562515	0.421784	0.517388	-0.862823	0.696011	TDGF1
endocytic vesicle (GO:0030139)	0.415423	0.545985	0.392065	0.508028	-0.753887	0.662258	SH3KBP1
microtubule organizing center (GO:0005815)	0.455326	0.56608	0.404366	0.516691	-0.82742	0.650966	RBM39;CEP57L1;TSEN2
integral component of endoplasmic reticulum membrane (GO:0030176)	0.470433	0.571206	0.445042	0.538735	-0.836716	0.630969	SLC27A2
chromatin (GO:0000785)	0.42863	0.555408	0.390057	0.508028	-0.735953	0.623471	CBX1;CTR9
recycling endosome (GO:0055037)	0.446343	0.562515	0.421784	0.517388	-0.720544	0.581239	SCAMP1
fibrillar center (GO:0001650)	0.47823	0.571391	0.45259	0.540757	-0.76595	0.565014	NOP58
axon (GO:0030424)	0.503408	0.593763	0.477035	0.56247	-0.712873	0.489283	IQGAP1
nucleolar part (GO:0044452)	0.532039	0.611845	0.504967	0.580712	-0.675587	0.426322	NOP58
cytoskeleton (GO:0005856)	0.471866	0.571206	0.420345	0.517388	-0.535424	0.402136	RBM39;DST;IQGAP1
cytoplasmic ribonucleoprotein granule (GO:0036464)	0.569823	0.647052	0.542064	0.60817	-0.682281	0.383735	IQGAP1
focal adhesion (GO:0005925)	0.524514	0.610826	0.482991	0.56247	-0.562987	0.363286	DST;IQGAP1
trans-Golgi network (GO:0005802)	0.600644	0.665774	0.572537	0.634619	-0.631559	0.321939	SCAMP1
nuclear chromosome part (GO:0044454)	0.57672	0.647052	0.534667	0.607276	-0.498807	0.274543	ERCC4;CBX1
centrosome (GO:0005813)	0.66491	0.728234	0.623901	0.68332	-0.509632	0.207983	CEP57L1;TSEN2
nuclear chromatin (GO:0000790)	0.715106	0.773997	0.687636	0.744265	-0.462076	0.154946	CBX1
actin cytoskeleton (GO:0015629)	0.767726	0.821288	0.741783	0.793535	-0.527528	0.139438	IQGAP1
mitochondrial matrix (GO:0005759)	0.783391	0.828413	0.758086	0.801654	-0.570606	0.139299	ARG2
nucleoplasm part (GO:0044451)	0.867985	0.897243	0.847942	0.876084	-0.499877	0.0707731	NELFA
nucleolus (GO:0005730)	0.848929	0.887517	0.820123	0.857401	-0.324706	0.0531802	NOP58;C1D
Golgi subcompartment (GO:0098791)	0.908053	0.918032	0.891899	0.9017	-0.515693	0.0497397	SCAMP1
mitochondrion (GO:0005739)	0.885147	0.904816	0.857039	0.876084	-0.398525	0.0486209	ARG2;GLRX2;TOMM6
integral component of plasma membrane (GO:0005887)	0.999429	0.999429	0.999264	0.999264	-0.159929	9.13069e-05	ROBO1

## Sheet: Cluster3-Biological Process
							Term	P-value	Adjusted P-value	Old P-value	Old Adjusted P-value	Z-score	Combined Score	Genes
							mitochondrial electron transport, cytochrome c to oxygen (GO:0006123)	4.80285e-09	8.16004e-07	1.14617e-07	2.16372e-05	-2.57923	49.4026	COX8A;COX7B;NDUFA4;COX6C;COX5A;COX10;COX6B1
							protein targeting to ER (GO:0045047)	1.68447e-10	1.10321e-07	4.90669e-09	4.16823e-06	-2.08836	46.9972	RPL41;RPS9;RPLP1;MRPS12;RPL22;RPLP0;RPL37A;RPL14;RPLP2;RPL37;SEC62;RPL39;RPS21
							mitochondrial ATP synthesis coupled electron transport (GO:0042775)	4.72816e-10	1.60663e-07	1.16676e-08	4.95579e-06	-1.89806	40.7556	COX8A;COX7B;NDUFA11;NDUFA4;UQCRQ;NDUFA3;UQCR11;UQCR10;COX6C;COX5A;COX10;COX6B1
							SRP-dependent cotranslational protein targeting to membrane (GO:0006614)	8.11907e-10	2.29905e-07	1.84775e-08	5.2322e-06	-1.83594	38.4292	RPL41;RPS9;RPLP1;MRPS12;RPL22;RPL37A;RPLP0;RPL14;RPLP2;RPL37;RPL39;RPS21
							peptide biosynthetic process (GO:0043043)	3.30812e-09	7.02563e-07	7.16742e-08	1.52218e-05	-1.91602	37.4139	RPL39L;RPL41;RPS9;RPLP1;MRPS12;RPL22;RPLP0;MRPL52;RPL37A;NHP2;RPL14;RPLP2;RPL37;RPL39;RPS21
							nuclear-transcribed mRNA catabolic process, nonsense-mediated decay (GO:0000184)	1.14885e-08	1.62657e-06	1.81838e-07	2.57453e-05	-1.98945	36.3711	RPL41;RPS9;RPLP1;MRPS12;RPL22;RPL37A;RPLP0;RPL14;RPLP2;RPL37;RPL39;RPS21
							cellular macromolecule biosynthetic process (GO:0034645)	4.04012e-09	7.62686e-07	1.30116e-07	2.21067e-05	-1.75184	33.8579	RPL39L;DUT;RPL41;RPS9;RPLP1;MRPS12;RPL22;RPLP0;NAP1L1;EEF1G;MRPL52;EEF1D;RPL37A;NHP2;RPL14;RPLP2;RPL37;PTMA;RPL39;RPS21;BPTF
							viral transcription (GO:0019083)	1.27051e-08	1.66047e-06	1.98536e-07	2.59472e-05	-1.77818	32.3295	RPL41;RPS9;RPLP1;MRPS12;RPL22;RPL37A;RPLP0;RPL14;RPLP2;RPL37;RPL39;RPS21
							cotranslational protein targeting to membrane (GO:0006613)	9.85058e-11	1.10321e-07	3.10822e-09	4.16823e-06	-1.36965	31.5579	RPL41;RPS9;RPLP1;MRPS12;RPL22;RPLP0;RPL37A;RPL14;RPLP2;RPL37;SEC62;RPL39;RPS21
							purine ribonucleoside triphosphate biosynthetic process (GO:0009206)	1.87211e-05	0.00102604	8.84928e-05	0.00528777	-2.89096	31.4706	CHCHD10;ATP5G3;ALDOA;ATP5G1;ATP5J2
							rRNA metabolic process (GO:0016072)	1.5295e-07	1.5286e-05	2.03407e-06	0.000203288	-1.92275	30.1741	RPL41;RPS9;RPLP1;MRPS12;RPL22;RPLP0;NOLC1;RPL37A;RPL14;RPLP2;RPL37;LYAR;RPL39;RPS21
							mitochondrial ATP synthesis coupled proton transport (GO:0042776)	0.00222016	0.0394283	0.0049604	0.0957695	-4.90519	29.9716	ATP5G3;ATP5G1;ATP5J2
							ATF6-mediated unfolded protein response (GO:0036500)	4.01297e-06	0.000306659	3.34981e-05	0.00237139	-2.35636	29.2801	HSPA5;DDIT3;CALR;HSP90B1
							viral gene expression (GO:0019080)	9.36399e-09	1.44631e-06	1.52151e-07	2.35004e-05	-1.57453	29.1075	RPL41;RPS9;RPLP1;MRPS12;RPL22;RPL37A;RPLP0;RPL14;RPLP2;RPL37;RPL39;RPS21
							rRNA processing (GO:0006364)	2.48497e-08	3.01569e-06	4.3054e-07	4.90683e-05	-1.60699	28.1391	RPL41;RPS9;RPLP1;MRPS12;RPL22;RPLP0;NOLC1;RPL37A;NHP2;RPL14;RPLP2;RPL37;LYAR;RPL39;RPS21
							gene expression (GO:0010467)	1.94798e-10	1.10321e-07	1.06082e-08	4.95579e-06	-1.25662	28.0969	RPL39L;RBM39;RPL41;RPS9;RPLP1;MRPS12;RPL22;RPLP0;HSPD1;MRPL52;ZC3H11A;DHX36;RPL37A;NHP2;RPL14;RPLP2;SRSF3;RPL37;SRSF6;PTMA;RPL39;RPS21;SRSF7;BPTF
							respiratory electron transport chain (GO:0022904)	1.53684e-09	3.73013e-07	3.18901e-08	7.74018e-06	-1.35634	27.5248	COX8A;COX7B;NDUFA11;NDUFA4;UQCRQ;NDUFA3;UQCR11;UQCR10;COX6C;COX5A;COX10;COX6B1
							viral process (GO:0016032)	7.67368e-08	8.14848e-06	1.17913e-06	0.000125209	-1.67737	27.4802	RANBP1;RPL41;RPS9;VCP;RPLP1;MRPS12;RPL22;RPLP0;UBB;RPL37A;RPL14;RPLP2;RPL37;RPL39;RPS21
							ncRNA processing (GO:0034470)	7.09561e-07	00:00:05.482000	8.03967e-06	0.000718916	-1.90392	26.9569	RPL41;RPS9;RPLP1;MRPS12;RPL22;RPLP0;NOLC1;RPL37A;RPL14;RPLP2;RPL37;LYAR;RPL39;RPS21
							purine ribonucleoside monophosphate biosynthetic process (GO:0009168)	7.65171e-06	0.00050001	4.11793e-05	0.00279855	-2.25423	26.5562	CHCHD10;ATP5G3;ALDOA;ATP5G1;PAICS;ATP5J2
							translation (GO:0006412)	4.66195e-10	00:00:00.014000	1.52322e-08	5.1759e-06	-1.22496	26.32	RPL39L;RPL41;RPS9;RPLP1;MRPS12;RPL22;RPLP0;EEF1G;MRPL52;EEF1D;PPA1;RPL37A;NHP2;RPL14;RPLP2;RPL37;RPL39;RPS21
							negative regulation of cell cycle arrest (GO:0071157)	5.31993e-06	00:00:32.539000	3.22272e-05	0.00237139	-2.1222	25.772	HSP90AB1;CCND1;MDM2;CALR;MIF
							hydrogen peroxide metabolic process (GO:0042743)	4.15135e-06	0.000306659	2.65599e-05	0.00214882	-2.05107	25.4171	PRDX2;GPX1;PRDX1;PARK7;SOD1
							ATP biosynthetic process (GO:0006754)	4.30516e-05	0.00197688	0.000176822	0.00883589	-2.47073	24.8386	CHCHD10;ATP5G3;ALDOA;ATP5G1;ATP5J2
							regulation of ATP biosynthetic process (GO:2001169)	0.000135896	0.00536948	0.000542475	0.0219444	-2.60126	23.1607	VCP;PARP1;TMSB4X
							proton transport (GO:0015992)	3.68875e-05	0.00184329	0.000155309	0.00799604	-2.24254	22.891	COX8A;ATP6V0B;ATP6V0D1;ATP6V1C1;ATP5J2
							ATP metabolic process (GO:0046034)	6.10232e-05	0.00265842	0.000245197	0.0115719	-2.19978	21.3472	PARP1;CHCHD10;ATP5G3;ALDOA;ATP5G1;ATP5J2
							regulation of mRNA splicing, via spliceosome (GO:0048024)	8.25197e-06	00:00:44.864000	4.48573e-05	0.00293125	-1.82318	21.3404	SNW1;SON;TRA2B;SRSF3;NSRP1;SRSF6;SRSF7
							nuclear-transcribed mRNA catabolic process (GO:0000956)	2.69961e-08	3.05776e-06	4.33211e-07	4.90683e-05	-1.22429	21.3364	EIF4A2;RPL41;RPS9;RPLP1;MRPS12;RPL22;RPLP0;RPL37A;RPL14;RPLP2;RPL37;CNOT8;RPL39;RPS21
							cytoplasmic translation (GO:0002181)	4.08017e-06	00:00:26.495000	2.44275e-05	0.00207512	-1.66427	20.6526	RPL41;RPLP1;RPL22;RPLP0;RPLP2;RPL39;RPS21
							snRNA modification (GO:0040031)	0.00289418	01:02:07.828000	0.00658578	0.10487	-3.23978	18.9367	NHP2;NOP10
							hydrogen ion transmembrane transport (GO:1902600)	2.2401e-05	0.00118935	0.000102578	0.00561751	-1.76236	18.8685	COX8A;ATP6V0B;ATP6V0D1;ATP6V1C1;ATP5J2
							regulation of intrinsic apoptotic signaling pathway by p53 class mediator (GO:1902253)	0.00289418	0.0431462	0.00658578	0.10487	-3.18623	18.6237	UBB;MDM2
							RNA-dependent DNA biosynthetic process (GO:0006278)	0.000124803	0.0050486	0.00043855	0.0181731	-2.02927	18.2406	HSP90AA1;HSP90AB1;NHP2;NOP10
							telomere maintenance via telomerase (GO:0007004)	0.000103079	00:06:09.058000	0.000375167	0.0159352	-1.97137	18.0972	HSP90AA1;HSP90AB1;NHP2;NOP10
							hydrogen peroxide catabolic process (GO:0042744)	0.000697888	0.0175818	0.0018912	0.0481651	-2.48134	18.033	PRDX2;GPX1;PRDX1
							ATP generation from ADP (GO:0006757)	0.000209811	0.00774933	0.000674223	0.0254557	-2.12322	17.9822	LDHA;PKM;TPI1;ALDOA
							positive regulation of cellular protein catabolic process (GO:1903364)	0.00121876	00:36:21.779000	0.00298871	0.0642761	-2.67084	17.9211	HSP90AA1;ATPIF1;VPS35
							mitochondrial electron transport, ubiquinol to cytochrome c (GO:0006122)	0.000697888	0.0175818	0.0018912	0.0481651	-2.43587	17.7026	UQCRQ;UQCR11;UQCR10
							response to unfolded protein (GO:0006986)	1.35192e-05	00:01:08.432000	6.66851e-05	0.00419622	-1.55435	17.4264	HSP90AA1;HSP90AB1;HSPA5;DDIT3;HSPE1;HSPD1
							regulation of cell cycle arrest (GO:0071156)	0.000295917	00:15:04.974000	0.000929502	0.0329005	-2.14343	17.4163	HSP90AB1;CCND1;MDM2;CALR;MIF
							regulation of apoptotic process (GO:0042981)	5.03684e-05	00:03:14.573000	0.000704882	0.0260347	-1.73162	17.1364	VCP;ANP32A;HSPA5;PLK2;NME2;MIF;PA2G4;PARK7;TBX3;HSP90B1;HSPD1;NME1;SOD1;PRDX2;SON;UBB;FAM162A;CFL1;ANP32B;CALR;SGK1;SQSTM1;TDGF1;MAP4K4
							ribosome biogenesis (GO:0042254)	6.73082e-07	00:00:05.482000	7.66799e-06	0.000718916	-1.20076	17.0645	RPL41;RPS9;RPLP1;MRPS12;RPL22;RPLP0;NOLC1;RPL37A;RPL14;RPLP2;RPL37;LYAR;RPL39;RPS21
							regulation of mitochondrial membrane potential (GO:0051881)	6.64091e-05	00:04:03.711000	0.000255162	0.0117168	-1.75994	16.93	VCP;UBB;ATPIF1;PARK7;SOD1
							outer mitochondrial membrane organization (GO:0007008)	0.00382844	01:13:10.554000	0.0081567	0.113592	-3.04148	16.9268	HSP90AA1;TOMM7
							nucleoside phosphate biosynthetic process (GO:1901293)	0.00605622	01:32:01.825000	0.011745	0.130712	-3.29321	16.8173	NME2;SUCLG1
							anterior/posterior axis specification (GO:0009948)	0.00143452	0.0286735	0.00342521	0.0709686	-2.55957	16.7573	DDIT3;TDGF1;TBX3
							pyrimidine deoxyribonucleotide biosynthetic process (GO:0009221)	0.00289418	01:02:07.828000	0.00658578	0.10487	-2.78031	16.251	DTYMK;DUT
							nucleoside triphosphate biosynthetic process (GO:0009142)	0.00605622	01:32:01.825000	0.011745	0.130712	-3.15168	16.0946	NME2;SUCLG1
							positive regulation of telomerase RNA localization to Cajal body (GO:1904874)	0.000851356	00:28:55.744000	0.00222277	0.0555367	-2.26684	16.0236	CCT3;NHP2;NOP10
							telomere maintenance via telomere lengthening (GO:0010833)	0.000330143	00:15:14.393000	0.000987881	0.0335682	-1.99373	15.9817	HSP90AA1;HSP90AB1;NHP2;NOP10
							nucleocytoplasmic transport (GO:0006913)	0.000242723	00:12:38.089000	0.000781321	0.0282439	-1.91047	15.9019	ANP32A;SNRPD2;SNRPD3;SNRPF;NSRP1
							positive regulation of autophagy of mitochondrion (GO:1903599)	0.00382844	01:13:10.554000	0.0081567	0.113592	-2.85127	15.8682	ATPIF1;PARK7
							ATP synthesis coupled proton transport (GO:0015986)	0.00447949	01:20:32.642000	0.00911689	0.121965	-2.93315	15.8632	ATP5G3;ATP5G1;ATP5J2
							positive regulation of ATP biosynthetic process (GO:2001171)	0.00289418	01:02:07.828000	0.00658578	0.10487	-2.64635	15.468	VCP;TMSB4X
							cellular protein metabolic process (GO:0044267)	1.78628e-06	00:00:13.111000	2.8555e-05	0.00220523	-1.16381	15.4035	RPL39L;RPL41;RPS9;RPLP1;IGFBP2;MRPS12;RPL22;RPLP0;PDIA6;HSP90B1;MRPL52;UBB;RPL37A;NHP2;RPL14;SPP1;RPLP2;RPL37;RPL39;RPS21
							regulation of RNA polymerase II regulatory region sequence-specific DNA binding (GO:1903025)	0.00382844	01:13:10.554000	0.0081567	0.113592	-2.7207	15.1415	DDIT3;TMSB4X
							rRNA pseudouridine synthesis (GO:0031118)	0.00488346	01:23:33.836000	0.00987795	0.125321	-2.81586	14.9857	NHP2;NOP10
							cristae formation (GO:0042407)	0.00447949	01:20:32.642000	0.00911689	0.121965	-2.74858	14.865	ATP5G3;ATP5G1;ATP5J2
							cellular response to superoxide (GO:0071451)	0.00605622	0.06391	0.011745	0.130712	-2.90896	14.8551	PRDX2;SOD1
							glycolytic process (GO:0006096)	0.000177909	0.00675214	0.000587619	0.0232178	-1.71787	14.8325	LDHA;PKM;TPI1;ALDOA
							removal of superoxide radicals (GO:0019430)	0.00605622	01:32:01.825000	0.011745	0.130712	-2.87604	14.687	PRDX2;SOD1
							mRNA processing (GO:0006397)	4.16927e-05	00:02:50.006000	0.000288795	0.0125811	-1.44189	14.5417	SPEN;SF3B5;GTF2H1;SNW1;SON;SNRPD2;TRA2B;ZC3H11A;SRSF3;SNRPD3;SNRPF;SRSF6;SRSF7
							negative regulation of programmed cell death (GO:0043069)	9.81906e-06	00:00:51.478000	0.000105804	0.00561751	-1.25514	14.4733	HSPA5;PLK2;NME2;MIF;PA2G4;PARK7;YBX3;TBX3;HSP90B1;HSPD1;PRDX2;SON;UBB;CFL1;SQSTM1;TDGF1;MAP4K4
							carbohydrate catabolic process (GO:0016052)	0.000881057	00:29:31.693000	0.00230098	0.0566575	-2.05139	14.4303	LDHA;PKM;TPI1;ALDOA
							retrograde axonal transport (GO:0008090)	0.00382844	01:13:10.554000	0.0081567	0.113592	-2.5878	14.4019	PAFAH1B1;SOD1
							regulation of organ growth (GO:0046620)	0.00605622	01:32:01.825000	0.011745	0.130712	-2.73467	13.9651	WWC2;SOD1
							phagosome acidification (GO:0090383)	0.000330143	00:15:14.393000	0.000987881	0.0335682	-1.72349	13.8155	ATP6V0B;ATP6V0D1;ATP6V1D;ATP6V1C1
							transferrin transport (GO:0033572)	0.000978635	00:30:41.761000	0.00252215	0.0587313	-1.97331	13.6737	ATP6V0B;ATP6V0D1;ATP6V1D;ATP6V1C1
							nucleobase-containing small molecule interconversion (GO:0015949)	0.000558434	00:22:02.170000	0.00154912	0.0447172	-1.81342	13.5832	DTYMK;DUT;NME2;NME1
							regulation of telomerase RNA localization to Cajal body (GO:1904872)	0.00143452	00:41:17.392000	0.00342521	0.0709686	-2.06657	13.5297	CCT3;NHP2;NOP10
							intracellular pH reduction (GO:0051452)	0.000706793	00:25:19.067000	0.00189939	0.0481651	-1.85825	13.4812	ATP6V0B;ATP6V0D1;ATP6V1D;ATP6V1C1
							protein stabilization (GO:0050821)	1.64533e-05	00:01:20.508000	0.0001	0.00561751	-1.21759	13.4117	CCT3;CDKN1A;HSP90AA1;HSP90AB1;LAMP1;CALR;PARK7;PFN1;PPIB;HSPD1
							mitochondrial transport (GO:0006839)	3.96333e-05	0.00192391	0.000204069	0.00990608	-1.31549	13.3336	HSP90AA1;TIMM13;TOMM7;VPS35;ATP5G3;SLC25A5;ATP5G1;ATP5J2;HSPD1
							cellular response to UV-B (GO:0071493)	0.00488346	01:23:33.836000	0.00987795	0.125321	-2.47321	13.1622	CDKN1A;CRIP1
							positive regulation of cellular biosynthetic process (GO:0031328)	0.000714034	00:25:19.067000	0.00254106	0.0587313	-1.80727	13.0929	FXR1;FABP3;HSP90AA1;HSP90AB1;PLA2G1B;SP1;CALR;PARK7
							regulation of G2/M transition of mitotic cell cycle (GO:0010389)	0.000466217	00:19:19.960000	0.0017314	0.047446	-1.69414	12.9955	HSP90AA1;CCND1;UBB;PSMB3;RCC2;DYNLL1;PSMA7;PAFAH1B1
							response to vitamin (GO:0033273)	0.00605622	01:32:01.825000	0.011745	0.130712	-2.49912	12.7622	SPP1;AQP3
							maintenance of protein localization in endoplasmic reticulum (GO:0035437)	0.00605622	01:32:01.825000	0.011745	0.130712	-2.46006	12.5627	PDIA3;HSPA5
							transcription from RNA polymerase II promoter (GO:0006366)	2.52842e-05	00:01:52.472000	0.000263395	0.0117765	-1.17637	12.4523	CDKN1A;PARP1;GTF2H1;VEZF1;AFF4;SNW1;CCND1;PTTG1;SP1;DDIT3;ZC3H11A;SRSF3;ELOB;SNRPD3;SNRPF;SRSF6;SRSF7;TAF3
							regulation of macroautophagy (GO:0016241)	0.000531724	0.0148098	0.00180368	0.0481651	-1.64707	12.4179	ATP6V0B;VPS26A;VPS35;ATP6V0D1;ATP6V1D;ATP6V1C1;SNX6
							establishment of protein localization to mitochondrial membrane (GO:0090151)	0.000446529	0.0133097	0.00132493	0.0411141	-1.60672	12.3942	HSP90AA1;TIMM13;TOMM7
							negative regulation of apoptotic process (GO:0043066)	7.01991e-06	00:00:41.219000	9.02563e-05	0.00528777	-1.04444	12.3942	GPX1;HSPA5;PLK2;NME2;MIF;PA2G4;PARK7;TBX3;HSP90B1;HSPD1;SOD1;PRDX2;SON;UBB;CFL1;FNIP1;SQSTM1;TDGF1;MAP4K4
							nuclear transport (GO:0051169)	0.00253073	00:59:32.068000	0.0055502	0.0968062	-2.07033	12.379	ANP32A;BANF1;NSRP1
							glutathione metabolic process (GO:0006749)	0.000325613	00:15:14.393000	0.00101097	0.0336793	-1.52236	12.2242	EEF1G;GPX1;GSTA4;PARK7;SOD1
							response to vitamin D (GO:0033280)	0.00488346	01:23:33.836000	0.00987795	0.125321	-2.29352	12.2059	SPP1;AQP3
							nucleoside triphosphate metabolic process (GO:0009141)	0.000697888	00:25:19.067000	0.0018912	0.0481651	-1.65599	12.0348	NME2;SUCLG1;DCTPP1
							nucleotide metabolic process (GO:0009117)	0.0118664	02:22:18.808000	0.0205856	0.185314	-2.70619	11.9994	PARK7;REXO2
							lagging strand elongation (GO:0006273)	0.00488346	01:23:33.836000	0.00987795	0.125321	-2.25366	11.9938	LIG1;PARP1
							inner mitochondrial membrane organization (GO:0007007)	0.000978635	00:30:41.761000	0.00252215	0.0587313	-1.72246	11.9355	TIMM13;ATP5G3;ATP5G1;ATP5J2
							modulation by host of viral process (GO:0044788)	0.00874321	0.0848841	0.0158993	0.162729	-2.51142	11.9028	CFL1;PPIB
							regulation of proteolysis involved in cellular protein catabolic process (GO:1903050)	0.00286685	0.0431462	0.00618033	0.103964	-2.03168	11.8946	GPX1;UBB;ATPIF1
							DNA-templated transcription, termination (GO:0006353)	0.000309289	00:15:08.032000	0.00110833	0.0355293	-1.46143	11.8102	ZC3H11A;SRSF3;GTF2H1;SNRPD3;SNRPF;SRSF6;SRSF7
							termination of RNA polymerase II transcription (GO:0006369)	0.000178838	0.00675214	0.000632422	0.0244201	-1.31492	11.3465	ZC3H11A;SRSF3;SNRPD3;SNRPF;SRSF6;SRSF7
							regulation of mitotic cell cycle phase transition (GO:1901990)	0.00181189	0.0345888	0.00587068	0.10075	-1.79345	11.3227	HSP90AA1;UBB;PSMB3;UBE2C;DYNLL1;CDC14A;PSMA7;PAFAH1B1
							protein transmembrane import into intracellular organelle (GO:0044743)	0.00188396	00:50:39.043000	0.00449139	0.0877112	-1.80371	11.3171	HSP90AA1;TIMM13;TOMM7;HSPD1
							cellular response to oxidative stress (GO:0034599)	0.00277724	01:02:07.828000	0.00739759	0.11079	-1.8873	11.1092	PRDX2;GPX1;PARP1;PRDX1;PARK7;SOD1
							cellular response to ionizing radiation (GO:0071479)	0.00240695	0.0404893	0.00558388	0.0968062	-1.82964	11.0316	CDKN1A;EEF1D;MDM2;TLK2
							regulation of protein modification by small protein conjugation or removal (GO:1903320)	0.0135847	0.103499	0.0231181	0.187815	-2.56088	11.0087	HSP90AA1;HSP90AB1
							regulation of cellular protein catabolic process (GO:1903362)	0.0193337	02:52:00.230000	0.0314256	0.206147	-2.7898	11.0083	HSP90AA1;VPS35
							nucleotide-excision repair, DNA duplex unwinding (GO:0000717)	0.00253073	0.0413434	0.0055502	0.0968062	-1.84041	11.0043	PARP1;UBB;GTF2H1
							chaperone-mediated protein complex assembly (GO:0051131)	0.00121876	00:36:21.779000	0.00298871	0.0642761	-1.63133	10.9461	HSP90AA1;HSP90AB1;HSPD1
							mRNA splicing, via spliceosome (GO:0000398)	0.00130434	00:38:26.855000	0.0050586	0.096568	-1.64558	10.93	SPEN;SF3B5;SNW1;SNRPD2;TRA2B;SRSF3;SNRPD3;SNRPF;SRSF6;SRSF7
							phagosome maturation (GO:0090382)	0.000629521	00:24:03.901000	0.00171807	0.047446	-1.47929	10.9032	ATP6V0B;ATP6V0D1;ATP6V1D;ATP6V1C1
							sequestering of actin monomers (GO:0042989)	0.00734377	01:48:14.086000	0.0137536	0.146133	-2.21374	10.8781	TMSB4X;TMSB10
							pyrimidine deoxyribonucleotide catabolic process (GO:0009223)	0.0102517	02:11:18.974000	0.0181781	0.175995	-2.37174	10.8633	DUT;DCTPP1
							DNA ligation involved in DNA repair (GO:0051103)	0.0102517	02:11:18.974000	0.0181781	0.175995	-2.37116	10.8607	LIG1;PARP1
							heart process (GO:0003015)	0.00874321	02:02:13.987000	0.0158993	0.162729	-2.28738	10.841	GPX1;SOD1
							neutrophil mediated immunity (GO:0002446)	0.00240519	00:58:18.273000	0.0112219	0.130712	-1.79571	10.8284	HSP90AA1;VCP;HSP90AB1;PLA2G1B;NME2;DNAJC13;MIF;PA2G4;DYNLL1;APRT;PKM;LAMP1;ALDOA;ATP6V1D
							positive regulation of transcription from RNA polymerase II promoter in response to endoplasmic reticulum stress (GO:1990440)	0.00874321	02:02:13.987000	0.0158993	0.162729	-2.28318	10.8211	HSPA5;DDIT3
							interleukin-12-mediated signaling pathway (GO:0035722)	0.00240695	0.0404893	0.00558388	0.0968062	-1.78481	10.7613	CFL1;RPLP0;MIF;SOD1
							retrograde transport, endosome to plasma membrane (GO:1990126)	0.0135847	02:29:02.347000	0.0231181	0.187815	-2.4863	10.6881	VPS26A;VPS35
							negative regulation of actin filament polymerization (GO:0030837)	0.00253073	0.0413434	0.0055502	0.0968062	-1.77318	10.6023	TMSB4X;PFN1;TMSB10
							positive regulation of cell cycle (GO:0045787)	0.000489849	00:19:58.446000	0.00155286	0.0447172	-1.38766	10.5759	HSP90AB1;CCND1;MDM2;CALR;MIF;TBX3
							positive regulation of mRNA splicing, via spliceosome (GO:0048026)	0.00734377	0.075163	0.0137536	0.146133	-2.15054	10.5675	SNW1;TRA2B
							nicotinamide nucleotide metabolic process (GO:0046496)	0.00222276	00:56:46.607000	0.00520194	0.0968062	-1.71888	10.5007	LDHA;PKM;TPI1;ALDOA
							positive regulation of G2/M transition of mitotic cell cycle (GO:0010971)	0.0173209	02:44:15.044000	0.0285419	0.197125	-2.58378	10.4794	CCND1;RCC2
							negative regulation of cell cycle process (GO:0010948)	0.000458978	00:19:19.960000	0.00146496	0.043666	-1.35877	10.4442	HSP90AB1;CCND1;MGA;MDM2;CALR;MIF
							positive regulation of cell cycle G2/M phase transition (GO:1902751)	0.0193337	02:52:00.230000	0.0314256	0.206147	-2.63728	10.4065	CCND1;RCC2
							glycolytic process through glucose-6-phosphate (GO:0061620)	0.00361833	01:11:23.447000	0.00756421	0.11079	-1.84537	10.3742	PKM;TPI1;ALDOA
							ferric iron transport (GO:0015682)	0.000978635	0.0213167	0.00252215	0.0587313	-1.48552	10.2937	ATP6V0B;ATP6V0D1;ATP6V1D;ATP6V1C1
							negative regulation of transferase activity (GO:0051348)	0.00598626	01:32:01.825000	0.011771	0.130712	-2.00196	10.2466	EIF4A2;CHCHD10;PARK7
							glucose catabolic process to pyruvate (GO:0061718)	0.00361833	01:11:23.447000	0.00756421	0.11079	-1.81625	10.2105	PKM;TPI1;ALDOA
							response to UV-B (GO:0010224)	0.0118664	02:22:18.808000	0.0205856	0.185314	-2.29405	10.1719	CDKN1A;CRIP1
							positive regulation of purine nucleotide biosynthetic process (GO:1900373)	0.00322917	01:06:05.005000	0.00685145	0.10487	-1.76478	10.1219	VCP;TMSB4X;CALM1
							response to endoplasmic reticulum stress (GO:0034976)	0.000309289	00:15:08.032000	0.00110833	0.0355293	-1.23329	9.9665	PDIA3;VCP;HSPA5;DDIT3;PDIA6;HSP90B1;PDIA4
							positive regulation of fibroblast proliferation (GO:0048146)	0.00495257	0.0580305	0.00995782	0.125321	-1.87287	9.94092	CDKN1A;PLA2G1B;MIF
							nucleotide-excision repair, DNA incision, 5'-to lesion (GO:0006296)	0.0105659	02:11:53.311000	0.0195287	0.183311	-2.18052	9.92162	PARP1;UBB;GTF2H1
							negative regulation of proteasomal ubiquitin-dependent protein catabolic process (GO:0032435)	0.00322917	01:06:05.005000	0.00685145	0.10487	-1.72492	9.8933	HSP90AB1;TLK2;PARK7
							macroautophagy (GO:0016236)	0.000386884	00:16:54.144000	0.00135514	0.0411141	-1.24697	9.79789	VCP;UBB;TOMM7;ATG14;DYNLL1;SQSTM1;TOMM6
							cellular senescence (GO:0090398)	0.00322917	01:06:05.005000	0.00685145	0.10487	-1.69845	9.74154	CDKN1A;CALR;TBX3
							negative regulation of signal transduction by p53 class mediator (GO:1901797)	0.0154037	02:35:43.668000	0.0257714	0.190231	-2.31832	9.67469	MDM2;MIF
							protein alkylation (GO:0008213)	0.00545468	01:28:19.497000	0.0108424	0.130712	-1.85001	9.64093	VCP;SNRPD3;CALM1
							cellular response to insulin stimulus (GO:0032869)	0.000386884	00:16:54.144000	0.00135514	0.0411141	-1.22113	9.59485	ATP6V0B;PKM;PARP1;PLA2G1B;ATP6V0D1;ATP6V1D;ATP6V1C1
							regulation of mitotic sister chromatid separation (GO:0010965)	0.0154037	02:35:43.668000	0.0257714	0.190231	-2.29113	9.56121	PTTG1;UBE2C
							positive regulation by host of viral process (GO:0044794)	0.00874321	02:02:13.987000	0.0158993	0.162729	-2.01363	9.54353	CFL1;PPIB
							regulation of phosphoprotein phosphatase activity (GO:0043666)	0.00910066	02:03:09.459000	0.0170856	0.170755	-2.0234	9.50878	HSP90AB1;CALM1;HSP90B1
							regulation of synapse organization (GO:0050807)	0.0135847	02:29:02.347000	0.0231181	0.187815	-2.21138	9.50631	FXR1;VPS35
							regulation of keratinocyte differentiation (GO:0045616)	0.00545468	01:28:19.497000	0.0108424	0.130712	-1.81088	9.43699	NME2;SRSF6;AQP3
							canonical glycolysis (GO:0061621)	0.00361833	01:11:23.447000	0.00756421	0.11079	-1.6718	9.39845	PKM;TPI1;ALDOA
							RNA transport (GO:0050658)	0.00291599	01:02:07.828000	0.00714534	0.108392	-1.60417	9.36439	RANBP1;ZC3H11A;SRSF3;SRSF6;SRSF7
							negative regulation of mRNA splicing, via spliceosome (GO:0048025)	0.0118664	02:22:18.808000	0.0205856	0.185314	-2.10717	9.34327	SRSF6;SRSF7
							nucleotide-excision repair, preincision complex assembly (GO:0006294)	0.00545468	01:28:19.497000	0.0108424	0.130712	-1.79059	9.33126	PARP1;UBB;GTF2H1
							regulation of retinoic acid receptor signaling pathway (GO:0048385)	0.0118664	0.0988288	0.0205856	0.185314	-2.10046	9.31351	SNW1;CALR
							negative regulation of intrinsic apoptotic signaling pathway by p53 class mediator (GO:1902254)	0.0135847	02:29:02.347000	0.0231181	0.187815	-2.16437	9.30423	MDM2;MIF
							global genome nucleotide-excision repair (GO:0070911)	0.00713958	01:46:30.517000	0.0137618	0.146133	-1.87304	9.25675	PARP1;UBB;GTF2H1
							embryonic axis specification (GO:0000578)	0.0154037	02:35:43.668000	0.0257714	0.190231	-2.20406	9.19788	TDGF1;TBX3
							neutrophil degranulation (GO:0043312)	0.00548746	0.0613368	0.0216317	0.187815	-1.76694	9.19745	HSP90AA1;VCP;HSP90AB1;NME2;DNAJC13;MIF;PA2G4;DYNLL1;APRT;PKM;LAMP1;ALDOA;ATP6V1D
							regulation of proteasomal ubiquitin-dependent protein catabolic process (GO:0032434)	0.00437358	01:20:32.642000	0.0103006	0.127742	-1.68991	9.17987	VCP;HSP90AB1;MDM2;TLK2;PARK7
							stem cell development (GO:0048864)	0.0135847	02:29:02.347000	0.0231181	0.187815	-2.13443	9.17551	TCOF1;NOLC1
							NADH metabolic process (GO:0006734)	0.0810475	06:25:01.459000	0.106721	0.369285	-3.63425	9.13185	VCP
							nuclear export (GO:0051168)	0.000895741	0.0205657	0.00266892	0.0596644	-1.29157	9.06405	RANBP1;ZC3H11A;SRSF3;CALR;SRSF6;SRSF7
							positive regulation of cell proliferation (GO:0008284)	0.00196252	00:52:11.361000	0.00885078	0.1203	-1.44648	9.01668	CDKN1A;RPS9;PLA2G1B;NME2;NAP1L1;MIF;TBX3;NME1;MDM2;CALR;CNOT8;SLC25A5;TDGF1
							RNA splicing, via transesterification reactions with bulged adenosine as nucleophile (GO:0000377)	0.000608452	00:23:37.728000	0.00255804	0.0587313	-1.21707	9.01192	SPEN;SF3B5;SNW1;SNRPD2;TRA2B;SRSF3;SNRPD3;SNRPF;SRSF6;SRSF7
							negative regulation of proteasomal protein catabolic process (GO:1901799)	0.00495257	01:23:33.836000	0.00995782	0.125321	-1.69777	9.01153	HSP90AB1;TLK2;PARK7
							non-canonical Wnt signaling pathway (GO:0035567)	0.00451022	01:20:32.642000	0.0114568	0.130712	-1.66558	8.99645	TNRC6C;UBB;PSMB3;CALM1;PFN1;PSMA7
							positive regulation of cell cycle arrest (GO:0071158)	0.00324129	01:06:05.005000	0.0078602	0.113174	-1.56946	8.99582	CDKN1A;UBB;PLK2;MDM2;CNOT8
							DNA strand elongation involved in DNA replication (GO:0006271)	0.0173209	02:44:15.044000	0.0285419	0.197125	-2.21643	8.98946	LIG1;PARP1
							mitotic cell cycle phase transition (GO:0044772)	0.000364857	00:16:31.827000	0.00161719	0.0457934	-1.13222	8.96263	RANBP1;CDKN1A;HSP90AA1;CCND1;UBB;CCNE1;UBE2C;PLK2;DYNLL1;PAFAH1B1
							endoplasmic reticulum to cytosol transport (GO:1903513)	0.0173209	02:44:15.044000	0.0285419	0.197125	-2.20076	8.92592	VCP;HSP90B1
							purine ribonucleotide biosynthetic process (GO:0009152)	0.00220659	00:56:46.607000	0.00555905	0.0968062	-1.4563	8.9072	CHCHD10;ATP5G3;ALDOA;ATP5G1;ATP5J2
							mitochondrial electron transport, NADH to ubiquinone (GO:0006120)	0.0187753	02:52:00.230000	0.0327844	0.210987	-2.23502	8.88469	NDUFA11;NDUFA4;NDUFA3
							regulation of autophagy (GO:0010506)	0.000827421	00:28:55.144000	0.00312965	0.066466	-1.24507	8.8365	ATP6V0B;PLK2;TLK2;VPS26A;VPS35;ATP6V0D1;ATP6V1D;ATP6V1C1;SNX6
							proteasome-mediated ubiquitin-dependent protein catabolic process (GO:0043161)	0.000842243	00:28:55.744000	0.00367443	0.0743197	-1.24416	8.80797	VCP;HSPA5;PTTG1;UBB;PSMB3;UBE2C;DDIT3;MDM2;RLIM;PSMA7;HSP90B1
							negative regulation of mitotic cell cycle phase transition (GO:1901991)	0.00276252	01:02:07.828000	0.00680553	0.10487	-1.49324	8.79758	CDKN1A;UBB;PSMB3;JADE1;PSMA7
							pseudouridine synthesis (GO:0001522)	0.0154037	0.108144	0.0257714	0.190231	-2.10533	8.78584	NHP2;NOP10
							insulin receptor signaling pathway (GO:0008286)	0.00904099	02:03:09.459000	0.018335	0.175995	-1.85697	8.7389	ATP6V0B;ATP6V0D1;ATP6V1D;ATP6V1C1
							cellular response to hypoxia (GO:0071456)	0.00113505	00:34:42.732000	0.00357012	0.0730799	-1.28869	8.73874	UBB;FAM162A;PSMB3;MDM2;ELOB;AQP3;PSMA7
							negative regulation of transcription regulatory region DNA binding (GO:2000678)	0.0173209	02:44:15.044000	0.0285419	0.197125	-2.1325	8.6491	DDIT3;TMSB4X
							positive regulation of microtubule motor activity (GO:2000576)	0.0810475	06:25:01.459000	0.106721	0.369285	-3.43084	8.62075	DYNLL1
							nuclear import (GO:0051170)	0.00173699	0.0335357	0.00448319	0.0877112	-1.35412	8.60622	PDIA3;RANBP1;SNRPD2;SNRPD3;SNRPF
							DNA damage response, signal transduction by p53 class mediator resulting in cell cycle arrest (GO:0006977)	0.000952058	0.0213167	0.00261671	0.0592773	-1.23066	8.56154	CDKN1A;UBB;PLK2;MDM2;CNOT8
							cellular response to interleukin-12 (GO:0071349)	0.00240695	00:58:18.273000	0.00558388	0.0968062	-1.41641	8.54007	CFL1;RPLP0;MIF;SOD1
							substantia nigra development (GO:0021762)	0.00188396	0.0351741	0.00449139	0.0877112	-1.35428	8.49725	HSPA5;CALM1;DYNLL1;COX6B1
							regulation of epithelial cell proliferation (GO:0050678)	0.0115375	02:21:50.734000	0.0228616	0.187815	-1.89964	8.47647	GPX1;NME2;SRSF6;NME1
							regulation of keratinocyte proliferation (GO:0010837)	0.0214395	03:02:54.274000	0.034419	0.212647	-2.1947	8.43318	KLF9;SRSF6
							signal transduction involved in mitotic G1 DNA damage checkpoint (GO:0072431)	0.00102278	0.0219962	0.00278962	0.0615527	-1.22362	8.42493	CDKN1A;UBB;PLK2;MDM2;CNOT8
							pyruvate metabolic process (GO:0006090)	0.00240695	00:58:18.273000	0.00558388	0.0968062	-1.39478	8.40966	LDHA;PKM;TPI1;ALDOA
							selective autophagy (GO:0061912)	0.0154037	02:35:43.668000	0.0257714	0.190231	-1.9948	8.3246	ATG14;SQSTM1
							neural crest cell differentiation (GO:0014033)	0.0154037	02:35:43.668000	0.0257714	0.190231	-1.98865	8.29893	TCOF1;NOLC1
							regulation of protein targeting (GO:1903533)	0.0810475	0.267378	0.106721	0.369285	-3.28977	8.26628	ATPIF1
							acyl-CoA metabolic process (GO:0006637)	0.01216	0.0989518	0.0221546	0.187815	-1.86957	8.24407	DBT;DBI;SUCLG1
							anaphase-promoting complex-dependent catabolic process (GO:0031145)	0.00276252	01:02:07.828000	0.00680553	0.10487	-1.39587	8.22393	PTTG1;UBB;PSMB3;UBE2C;PSMA7
							positive regulation of immune system process (GO:0002684)	0.0173209	02:44:15.044000	0.0285419	0.197125	-2.01051	8.1543	PLA2G1B;AQP3
							regulation of transcription from RNA polymerase II promoter (GO:0006357)	0.00170904	00:48:03.633000	0.019095	0.182261	-1.27362	8.11528	CDKN1A;PLA2G1B;WWC2;PARK7;HSPD1;CHCHD2;CCND1;UBB;DHX36;UBN1;FNIP1;LYAR;BPTF;SPEN;PARP1;NME2;ARID5B;GTF2H1;VEZF1;TBX3;KLF6;SNW1;SP1;DDIT3;SUB1;KLF9;MDM2;CALR;SQSTM1;TAF3;TDGF1
							regulation of exit from mitosis (GO:0007096)	0.0154037	0.108144	0.0257714	0.190231	-1.94322	8.10935	UBE2C;CDC14A
							retrograde protein transport, ER to cytosol (GO:0030970)	0.0214395	03:02:54.274000	0.034419	0.212647	-2.10485	8.08793	VCP;HSP90B1
							positive regulation of intrinsic apoptotic signaling pathway (GO:2001244)	0.00776211	01:53:02.309000	0.0148245	0.155474	-1.66278	8.07862	UBB;DDIT3;SOD1
							mesenchymal cell development (GO:0014031)	0.0154037	02:35:43.668000	0.0257714	0.190231	-1.93298	8.06661	TCOF1;NOLC1
							positive regulation of canonical Wnt signaling pathway (GO:0090263)	0.0121724	02:22:29.433000	0.0259762	0.190231	-1.82561	8.04837	VCP;UBB;PSMB3;WNK1;PSMA7
							protein targeting to mitochondrion (GO:0006626)	0.00427171	01:20:23.537000	0.00932751	0.123808	-1.47079	8.02423	HSP90AA1;TIMM13;TOMM7;HSPD1
							positive regulation of secretion (GO:0051047)	0.0173209	02:44:15.044000	0.0285419	0.197125	-1.9759	8.01395	SPP1;TRH
							positive regulation of transporter activity (GO:0032411)	0.0135847	02:29:02.347000	0.0231181	0.187815	-1.86215	8.00502	WNK1;SGK1
							positive regulation of mRNA processing (GO:0050685)	0.0173209	02:44:15.044000	0.0285419	0.197125	-1.96331	7.96289	SNW1;TRA2B
							energy coupled proton transport, down electrochemical gradient (GO:0015985)	0.0118664	02:22:18.808000	0.0205856	0.185314	-1.78246	7.90348	ATP5G3;ATP5G1
							gluconeogenesis (GO:0006094)	0.0138846	02:29:38.706000	0.0249636	0.190231	-1.83964	7.86809	TPI1;MDH2;ALDOA
							maintenance of protein localization in organelle (GO:0072595)	0.0214395	03:02:54.274000	0.034419	0.212647	-2.04628	7.86289	HSPA5;TAF3
							heme biosynthetic process (GO:0006783)	0.0173209	02:44:15.044000	0.0285419	0.197125	-1.92505	7.8077	ATPIF1;COX10
							negative regulation of epidermal cell differentiation (GO:0045605)	0.0920788	06:29:45.077000	0.119238	0.370124	-3.26662	7.79125	SRSF6
							regulation of protein homodimerization activity (GO:0043496)	0.0173209	02:44:15.044000	0.0285419	0.197125	-1.91919	7.78392	HSPA5;PARK7
							positive regulation of protein deubiquitination (GO:1903003)	0.0920788	06:29:45.077000	0.119238	0.370124	-3.24644	7.74312	VCP
							cellular response to DNA damage stimulus (GO:0006974)	0.00222785	00:56:46.607000	0.00871338	0.119387	-1.26691	7.73664	CDKN1A;VCP;CCND1;LIG1;PARP1;DDIT3;H2AFX;TLK2;GTF2H1;PARK7;CRIP1
							positive regulation of phosphoprotein phosphatase activity (GO:0032516)	0.0154037	0.108144	0.0257714	0.190231	-1.85273	7.73171	HSP90AB1;CALM1
							protein exit from endoplasmic reticulum (GO:0032527)	0.0236358	03:10:13.097000	0.0375184	0.22445	-2.06294	7.72569	VCP;HSP90B1
							regulation of translation (GO:0006417)	0.00441997	01:20:32.642000	0.0130542	0.142174	-1.42104	7.70432	EIF4A2;FXR1;EIF5;TCOF1;NCL;NOLC1;CALR;CNOT8
							folic acid-containing compound biosynthetic process (GO:0009396)	0.0810475	06:25:01.459000	0.106721	0.369285	-3.05821	7.68443	ATPIF1
							activation of cysteine-type endopeptidase activity involved in apoptotic process (GO:0006919)	0.00276252	01:02:07.828000	0.00680553	0.10487	-1.30174	7.66935	VCP;FAM162A;ANP32B;HSPE1;HSPD1
							RNA splicing (GO:0008380)	0.00942466	0.0870244	0.0206147	0.185314	-1.63221	7.61332	SNRPD2;TRA2B;SNRPD3;SNRPF;SRSF7
							DNA damage response, signal transduction by p53 class mediator (GO:0030330)	0.00324129	01:06:05.005000	0.0078602	0.113174	-1.32605	7.60064	CDKN1A;UBB;PLK2;MDM2;CNOT8
							regulation of RNA splicing (GO:0043484)	0.00455771	01:20:48.131000	0.00988661	0.125321	-1.40867	7.59406	SON;AHNAK;TRA2B;SRSF3
							protein localization to nucleus (GO:0034504)	0.00628803	01:34:57.797000	0.0142994	0.150899	-1.48285	7.51671	PDIA3;RANBP1;MDM2;CALR;TAF3
							regulation of multicellular organism growth (GO:0040014)	0.0193337	02:52:00.230000	0.0314256	0.206147	-1.89078	7.46083	PPIB;SOD1
							dosage compensation by inactivation of X chromosome (GO:0009048)	0.0810475	06:25:01.459000	0.106721	0.369285	-2.96642	7.4538	RLIM
							negative regulation of DNA damage response, signal transduction by p53 class mediator (GO:0043518)	0.0102517	02:11:18.974000	0.0181781	0.175995	-1.62383	7.43764	MDM2;MIF
							regulation of cell cycle checkpoint (GO:1901976)	0.0810475	06:25:01.459000	0.106721	0.369285	-2.95268	7.41926	FEM1B
							negative regulation of keratinocyte differentiation (GO:0045617)	0.0810475	06:25:01.459000	0.106721	0.369285	-2.9419	7.39218	SRSF6
							cellular response to gamma radiation (GO:0071480)	0.0193337	02:52:00.230000	0.0314256	0.206147	-1.87002	7.37891	MDM2;TLK2
							regulation of extracellular exosome assembly (GO:1903551)	0.0810475	06:25:01.459000	0.106721	0.369285	-2.92738	7.35568	SDC4
							regulation of programmed cell death (GO:0043067)	0.00158654	00:45:08.077000	0.00602391	0.102346	-1.13298	7.30342	PRDX2;VCP;ANP32A;UBB;NME2;ANP32B;CALR;SGK1;MAP4K4;NME1
							positive regulation of cellular response to transforming growth factor beta stimulus (GO:1903846)	0.0236358	0.132096	0.0375184	0.22445	-1.94261	7.27506	HSP90AB1;SNW1
							error-free translesion synthesis (GO:0070987)	0.0236358	03:10:13.097000	0.0375184	0.22445	-1.94081	7.26832	VCP;UBB
							regulation of macrophage activation (GO:0043030)	0.0282901	03:38:37.461000	0.0440211	0.246026	-2.03696	7.26226	MIF;HSPD1
							positive regulation of mitotic cell cycle phase transition (GO:1901992)	0.0130059	0.103499	0.0235363	0.188623	-1.67036	7.25329	CCND1;UBE2C;RCC2
							granzyme-mediated apoptotic signaling pathway (GO:0008626)	0.0810475	06:25:01.459000	0.106721	0.369285	-2.87577	7.22601	LAMP1
							DNA duplex unwinding (GO:0032508)	0.0138846	02:29:38.706000	0.0249636	0.190231	-1.67967	7.1839	PARP1;UBB;GTF2H1
							positive regulation of transforming growth factor beta receptor signaling pathway (GO:0030511)	0.0236358	0.132096	0.0375184	0.22445	-1.90122	7.12007	HSP90AB1;SNW1
							negative regulation of RNA splicing (GO:0033119)	0.0214395	03:02:54.274000	0.034419	0.212647	-1.84997	7.10854	SRSF6;SRSF7
							IRE1-mediated unfolded protein response (GO:0036498)	0.00516778	01:26:00.526000	0.011069	0.130712	-1.35005	7.10843	HSPA5;ATP6V0D1;SEC62;PDIA6
							succinyl-CoA metabolic process (GO:0006104)	0.0810475	06:25:01.459000	0.106721	0.369285	-2.8218	7.0904	SUCLG1
							protein-DNA complex assembly (GO:0065004)	0.00503433	01:24:21.690000	0.0116964	0.130712	-1.33827	7.08141	PARP1;UBB;H2AFX;GTF2H1;ANP32B
							positive regulation of interferon-alpha production (GO:0032727)	0.0236358	03:10:13.097000	0.0375184	0.22445	-1.89075	7.08085	DHX36;HSPD1
							mammary gland development (GO:0030879)	0.0358906	04:09:27.339000	0.0544848	0.274232	-2.12404	7.06728	TDGF1;TBX3
							regulation of response to wounding (GO:1903034)	0.0810475	06:25:01.459000	0.106721	0.369285	-2.79698	7.02803	SRSF6
							innate immune response in mucosa (GO:0002227)	0.0236358	03:10:13.097000	0.0375184	0.22445	-1.87658	7.0278	PLA2G1B;RPL39
							negative regulation of phosphate metabolic process (GO:0045936)	0.0236358	03:10:13.097000	0.0375184	0.22445	-1.87181	7.00993	CDKN1A;DYNLL1
							cellular iron ion homeostasis (GO:0006879)	0.0310656	03:48:14.389000	0.0517738	0.26877	-2.01183	6.98438	UBB;ATP6V0D1;SOD1
							regulation of transforming growth factor beta receptor signaling pathway (GO:0017015)	0.0157171	0.109607	0.0302512	0.204768	-1.68171	6.98413	HSP90AB1;SNW1;UBB;SNX6
							negative regulation of amino acid transport (GO:0051956)	0.0810475	06:25:01.459000	0.106721	0.369285	-2.7686	6.95673	TRH
							negative regulation of translation (GO:0017148)	0.00437358	01:20:32.642000	0.0103006	0.127742	-1.27591	6.93095	FXR1;TNRC6C;NCL;CALR;CNOT8
							posttranscriptional regulation of gene expression (GO:0010608)	0.0167191	02:44:15.044000	0.0295197	0.200616	-1.69273	6.92531	TCOF1;NOLC1;ATG14
							porphyrin-containing compound biosynthetic process (GO:0006779)	0.0214395	03:02:54.274000	0.034419	0.212647	-1.79395	6.89328	ATPIF1;COX10
							ribonucleoprotein complex assembly (GO:0022618)	0.00292043	01:02:07.828000	0.00836253	0.115512	-1.17092	6.83353	HSP90AA1;HSP90AB1;SNW1;SNRPD2;SNRPD3;SNRPF;SRSF6
							establishment of mitochondrion localization, microtubule-mediated (GO:0034643)	0.0810475	06:25:01.459000	0.106721	0.369285	-2.70897	6.80688	UBB
							axonal transport (GO:0098930)	0.00981731	02:09:07.948000	0.0182843	0.175995	-1.47185	6.80524	FXR1;PAFAH1B1;SOD1
							PERK-mediated unfolded protein response (GO:0036499)	0.0102517	02:11:18.974000	0.0181781	0.175995	-1.48433	6.79869	HSPA5;DDIT3
							negative regulation of transcription, DNA-templated (GO:0045892)	0.0095728	02:06:35.816000	0.0443378	0.246984	-1.45823	6.77905	SPEN;PARP1;WWC2;ARID5B;PA2G4;TBX3;SNW1;CCND1;UBB;DDIT3;MDM2;RLIM;CALR;FNIP1;LYAR;TAF3;BPTF;SNX6
							DNA ligation (GO:0006266)	0.0214395	03:02:54.274000	0.034419	0.212647	-1.76313	6.77486	LIG1;PARP1
							positive regulation of ubiquitin protein ligase activity (GO:1904668)	0.0177644	02:45:53.067000	0.033802	0.212647	-1.6794	6.76892	UBB;PSMB3;UBE2C;PSMA7
							phosphorylation of RNA polymerase II C-terminal domain (GO:0070816)	0.0810475	06:25:01.459000	0.106721	0.369285	-2.67796	6.72896	GTF2H1
							regulation of interferon-alpha secretion (GO:1902739)	0.0810475	06:25:01.459000	0.106721	0.369285	-2.67677	6.72598	DHX36
							response to UV-A (GO:0070141)	0.0810475	06:25:01.459000	0.106721	0.369285	-2.67426	6.71966	CCND1
							positive regulation of mitophagy in response to mitochondrial depolarization (GO:0098779)	0.0810475	06:25:01.459000	0.106721	0.369285	-2.67353	6.71784	TOMM7
							regulation of endoplasmic reticulum stress-induced intrinsic apoptotic signaling pathway (GO:1902235)	0.0259201	03:25:53.604000	0.0407202	0.235319	-1.83791	6.71338	DDIT3;PARK7
							male genitalia development (GO:0030539)	0.0810475	06:25:01.459000	0.106721	0.369285	-2.66871	6.70573	TBX3
							aggrephagy (GO:0035973)	0.0810475	06:25:01.459000	0.106721	0.369285	-2.66626	6.69956	SQSTM1
							regulation of canonical Wnt signaling pathway (GO:0060828)	0.00441997	01:20:32.642000	0.0130542	0.142174	-1.2263	6.64855	VCP;UBB;PSMB3;WNK1;DDIT3;IGFBP2;JADE1;PSMA7
							protein retention in ER lumen (GO:0006621)	0.0810475	06:25:01.459000	0.106721	0.369285	-2.63928	6.63177	PDIA3
							posttranscriptional gene silencing by RNA (GO:0035194)	0.0214395	03:02:54.274000	0.034419	0.212647	-1.71931	6.60647	TNRC6C;CNOT8
							positive regulation of ion transmembrane transporter activity (GO:0032414)	0.0332776	03:58:03.465000	0.0509067	0.266124	-1.93644	6.58944	WNK1;TMSB4X
							regulation of digestive system process (GO:0044058)	0.0810475	0.267378	0.106721	0.369285	-2.61747	6.57697	SGK1
							negative regulation of keratinocyte proliferation (GO:0010839)	0.0920788	06:29:45.077000	0.119238	0.370124	-2.75412	6.56888	KLF9
							positive regulation of endothelial cell migration (GO:0010595)	0.0104916	02:11:53.311000	0.020977	0.186597	-1.43594	6.54385	SP1;TMSB4X;CALR;TDGF1
							DNA metabolic process (GO:0006259)	0.00490708	01:23:33.836000	0.0163948	0.166795	-1.23061	6.54323	TOP3B;DUT;VCP;LIG1;PARP1;UBB;GTF2H1;NAP1L1;PARK7;DCTPP1
							regulation of alternative mRNA splicing, via spliceosome (GO:0000381)	0.01216	0.0989518	0.0221546	0.187815	-1.47256	6.49341	TRA2B;NSRP1;SRSF6
							positive regulation of mitochondrial membrane potential (GO:0010918)	0.0810475	06:25:01.459000	0.106721	0.369285	-2.58046	6.48398	VCP
							nucleotide-excision repair, preincision complex stabilization (GO:0006293)	0.0282901	03:38:37.461000	0.0440211	0.246026	-1.80937	6.45083	PARP1;GTF2H1
							protein methylation (GO:0006479)	0.0187753	02:52:00.230000	0.0327844	0.210987	-1.62096	6.44368	VCP;SNRPD3;CALM1
							histone mRNA metabolic process (GO:0008334)	0.0358906	04:09:27.339000	0.0544848	0.274232	-1.93477	6.43754	SNRPD3;SNRPF
							nucleus localization (GO:0051647)	0.0810475	06:25:01.459000	0.106721	0.369285	-2.56194	6.43743	PAFAH1B1
							purine nucleotide catabolic process (GO:0006195)	0.0135847	02:29:02.347000	0.0231181	0.187815	-1.497	6.43531	HINT1;GPX1
							establishment of protein localization to organelle (GO:0072594)	0.0400346	04:28:30.203000	0.0652122	0.306767	-1.99793	6.42936	PDIA3;RANBP1;LAMP1
							erythrocyte development (GO:0048821)	0.0920788	06:29:45.077000	0.119238	0.370124	-2.68515	6.40437	LYAR
							proteolysis involved in cellular protein catabolic process (GO:0051603)	0.0266508	03:29:39.319000	0.0488195	0.262482	-1.7568	6.36827	VCP;PSMB3;MDM2;PSMA7
							chromatin silencing at telomere (GO:0006348)	0.0810475	0.267378	0.106721	0.369285	-2.53329	6.36546	DPY30
							meiosis I (GO:0007127)	0.0282901	03:38:37.461000	0.0440211	0.246026	-1.78321	6.35757	PTTG1;SYCP3
							nodal signaling pathway (GO:0038092)	0.102978	06:41:12.730000	0.13158	0.370124	-2.79267	6.34839	TDGF1
							hexose biosynthetic process (GO:0019319)	0.0167191	02:44:15.044000	0.0295197	0.200616	-1.54742	6.3308	TPI1;MDH2;ALDOA
							Wnt signaling pathway, planar cell polarity pathway (GO:0060071)	0.0223383	03:06:31.510000	0.0416034	0.237994	-1.65519	6.29211	UBB;PSMB3;PFN1;PSMA7
							corticosteroid receptor signaling pathway (GO:0031958)	0.0810475	06:25:01.459000	0.106721	0.369285	-2.48752	6.25045	CALR
							purine nucleobase biosynthetic process (GO:0009113)	0.0810475	06:25:01.459000	0.106721	0.369285	-2.48746	6.25029	PAICS
							vesicle fusion with endoplasmic reticulum-Golgi intermediate compartment (ERGIC) membrane (GO:1990668)	0.0810475	0.267378	0.106721	0.369285	-2.48061	6.23308	CALR
							retinoic acid receptor signaling pathway (GO:0048384)	0.0920788	06:29:45.077000	0.119238	0.370124	-2.60987	6.22484	SNW1
							transcription-coupled nucleotide-excision repair (GO:0006283)	0.0120847	02:22:29.433000	0.0238413	0.190171	-1.402	6.19098	LIG1;UBB;GTF2H1;HMGN1
							negative regulation of ubiquitin-protein ligase activity involved in mitotic cell cycle (GO:0051436)	0.0110065	02:16:41.465000	0.0219069	0.187815	-1.3725	6.18896	UBB;PSMB3;UBE2C;PSMA7
							phosphatidylcholine acyl-chain remodeling (GO:0036151)	0.0441792	04:46:42.184000	0.0657228	0.306767	-1.96988	6.14505	PLA2G1B;DBI
							positive regulation of ATP metabolic process (GO:1903580)	0.0332776	03:58:03.465000	0.0509067	0.266124	-1.79965	6.12396	VCP;TMSB4X
							nucleotide-excision repair (GO:0006289)	0.010161	02:11:18.974000	0.022065	0.187815	-1.33434	6.12353	LIG1;PARP1;UBB;GTF2H1;HMGN1
							negative regulation of necroptotic process (GO:0060546)	0.0810475	06:25:01.459000	0.106721	0.369285	-2.43595	6.12087	YBX3
							response to hydrogen peroxide (GO:0042542)	0.0157411	02:37:50.027000	0.0279555	0.197125	-1.47313	6.11569	GPX1;PARK7;SOD1
							mitochondrion organization (GO:0007005)	0.00424011	01:20:23.537000	0.0116939	0.130712	-1.11817	6.10876	CHCHD2;PARP1;TIMM13;TOMM7;CHCHD10;PARK7;HSPD1
							RNA 3'-end processing (GO:0031123)	0.00654704	01:38:16.094000	0.0136986	0.146133	-1.2143	6.10641	ZC3H11A;SRSF3;SRSF6;SRSF7
							mitochondrial DNA metabolic process (GO:0032042)	0.0920788	06:29:45.077000	0.119238	0.370124	-2.55949	6.10467	PARP1
							endonucleolytic cleavage in ITS1 to separate SSU-rRNA from 5.8S rRNA and LSU-rRNA from tricistronic rRNA transcript (SSU-rRNA, 5.8S rRNA, LSU-rRNA) (GO:0000447)	0.0920788	06:29:45.077000	0.119238	0.370124	-2.55773	6.10047	RPS21
							establishment of protein localization to mitochondrion (GO:0072655)	0.0221106	03:06:31.510000	0.0380189	0.225721	-1.59597	6.08334	TIMM13;TOMM7;HSPD1
							negative regulation of protein polymerization (GO:0032272)	0.0307434	03:46:33.180000	0.0474177	0.257389	-1.74069	6.06121	STMN2;PFN1
							positive regulation of protein complex assembly (GO:0031334)	0.0223383	03:06:31.510000	0.0416034	0.237994	-1.59212	6.05237	VCP;PARP1;GTF2H1;FNIP1
							regulation of dendritic spine maintenance (GO:1902950)	0.0920788	06:29:45.077000	0.119238	0.370124	-2.52457	6.02138	VPS35
							negative regulation of mRNA processing (GO:0050686)	0.0154037	02:35:43.668000	0.0257714	0.190231	-1.43946	6.00708	SRSF6;SRSF7
							nucleotide-excision repair, DNA incision (GO:0033683)	0.0130059	02:29:02.347000	0.0235363	0.188623	-1.38337	6.00707	PARP1;UBB;GTF2H1
							spliceosomal snRNP assembly (GO:0000387)	0.0105659	02:11:53.311000	0.0195287	0.183311	-1.31997	6.006	SNRPD2;SNRPD3;SNRPF
							positive regulation of RNA splicing (GO:0033120)	0.0307434	03:46:33.180000	0.0474177	0.257389	-1.72082	5.99204	SNW1;TRA2B
							mucosal immune response (GO:0002385)	0.0358906	04:09:27.339000	0.0544848	0.274232	-1.7985	5.98412	PLA2G1B;RPL39
							histone H4-K12 acetylation (GO:0043983)	0.0810475	06:25:01.459000	0.106721	0.369285	-2.37998	5.98023	JADE1
							fructose metabolic process (GO:0006000)	0.0920788	06:29:45.077000	0.119238	0.370124	-2.50513	5.97501	ALDOA
							positive regulation of mRNA catabolic process (GO:0061014)	0.0332776	0.165318	0.0509067	0.266124	-1.75262	5.96393	TNRC6C;CNOT8
							nucleotide-excision repair, DNA damage recognition (GO:0000715)	0.0332776	03:58:03.465000	0.0509067	0.266124	-1.75214	5.96232	PARP1;UBB
							mast cell degranulation (GO:0043303)	0.102978	06:41:12.730000	0.13158	0.370124	-2.61909	5.95382	S100A13
							regulation of necroptotic process (GO:0060544)	0.0173209	0.114063	0.0285419	0.197125	-1.46757	5.95223	UBB;YBX3
							vacuolar acidification (GO:0007035)	0.0259201	03:25:53.604000	0.0407202	0.235319	-1.62906	5.95052	ATP6V0B;ATP6V0D1
							negative regulation of biosynthetic process (GO:0009890)	0.102978	06:41:12.730000	0.13158	0.370124	-2.61521	5.945	PARK7
							regulation of stem cell differentiation (GO:2000736)	0.0223383	03:06:31.510000	0.0416034	0.237994	-1.56184	5.93726	UBB;PSMB3;OCIAD1;PSMA7
							positive regulation of protein ubiquitination involved in ubiquitin-dependent protein catabolic process (GO:2000060)	0.0215309	03:02:54.274000	0.0402382	0.234261	-1.54374	5.9253	UBB;PSMB3;UBE2C;PSMA7
							protein transport (GO:0015031)	0.0176187	02:45:47.355000	0.0472737	0.257389	-1.46298	5.90866	ATP6V0B;TIMM13;VPS26A;VPS35;ATP6V0D1;ATP6V1D;ATP6V1C1;HSP90B1;SNX6
							regulation of NAD(P)H oxidase activity (GO:0033860)	0.0810475	06:25:01.459000	0.106721	0.369285	-2.3386	5.87626	PARK7
							regulation of DNA damage response, signal transduction by p53 class mediator (GO:0043516)	0.0385799	04:22:55.162000	0.0581489	0.283894	-1.80295	5.86864	MDM2;MIF
							regulation of metaphase/anaphase transition of cell cycle (GO:1902099)	0.102978	06:41:12.730000	0.13158	0.370124	-2.58087	5.86694	UBE2C
							purine-containing compound biosynthetic process (GO:0072522)	0.0307434	03:46:33.180000	0.0474177	0.257389	-1.68484	5.86674	PAICS;APRT
							positive regulation of ATPase activity (GO:0032781)	0.00910066	02:03:09.459000	0.0170856	0.170755	-1.24776	5.86374	TMSB4X;DYNLL1;PFN1
							cell cycle G1/S phase transition (GO:0044843)	0.00526947	01:27:06.519000	0.0121889	0.134473	-1.11764	5.86294	RANBP1;CDKN1A;CCND1;CCNE1;PLK2
							female genitalia development (GO:0030540)	0.0920788	06:29:45.077000	0.119238	0.370124	-2.44057	5.82102	TBX3
							negative regulation of canonical Wnt signaling pathway (GO:0090090)	0.00928754	02:04:44.530000	0.021963	0.187815	-1.24371	5.81941	UBB;PSMB3;DDIT3;IGFBP2;JADE1;PSMA7
							negative regulation of cell cycle G1/S phase transition (GO:1902807)	0.0307434	03:46:33.180000	0.0474177	0.257389	-1.67079	5.81784	CDKN1A;JADE1
							cell cycle G2/M phase transition (GO:0044839)	0.0191982	02:52:00.230000	0.0391866	0.231174	-1.46379	5.78627	CDKN1A;HSP90AA1;UBB;DYNLL1;PAFAH1B1
							neutrophil activation involved in immune response (GO:0002283)	0.0058706	01:32:01.825000	0.022927	0.187815	-1.12276	5.76854	HSP90AA1;VCP;HSP90AB1;NME2;DNAJC13;MIF;PA2G4;DYNLL1;APRT;PKM;LAMP1;ALDOA;ATP6V1D
							spliceosomal complex assembly (GO:0000245)	0.0138846	02:29:38.706000	0.0249636	0.190231	-1.34798	5.76529	SNRPD2;SNRPD3;SRSF6
							nucleotide catabolic process (GO:0009166)	0.0193337	02:52:00.230000	0.0314256	0.206147	-1.45064	5.72408	VCP;GPX1
							nucleotide-excision repair, DNA incision, 3'-to lesion (GO:0006295)	0.0307434	03:46:33.180000	0.0474177	0.257389	-1.64202	5.71765	PARP1;GTF2H1
							regulation of chromatin assembly or disassembly (GO:0001672)	0.0920788	06:29:45.077000	0.119238	0.370124	-2.39465	5.71151	TLK2
							regulated exocytosis (GO:0045055)	0.0340152	04:01:13.077000	0.0655258	0.306767	-1.68856	5.70893	TMSB4X;ALDOA;CALM1;MANF;SOD1
							negative regulation of mitochondrial outer membrane permeabilization involved in apoptotic signaling pathway (GO:1901029)	0.0920788	06:29:45.077000	0.119238	0.370124	-2.39287	5.70725	SLC25A5
							translational elongation (GO:0006414)	0.00907065	0.0855261	0.0199136	0.184881	-1.21092	5.69459	EEF1G;MRPL52;EEF1D;MRPS25;MRPS12
							regulation of fibroblast proliferation (GO:0048145)	0.0187753	02:52:00.230000	0.0327844	0.210987	-1.4298	5.68375	CDKN1A;PLA2G1B;MIF
							regulation of cyclic-nucleotide phosphodiesterase activity (GO:0051342)	0.0920788	06:29:45.077000	0.119238	0.370124	-2.38277	5.68316	CALM1
							chaperone mediated protein folding requiring cofactor (GO:0051085)	0.0358906	04:09:27.339000	0.0544848	0.274232	-1.70154	5.66149	HSPA5;HSPE1
							regulation of cellular protein metabolic process (GO:0032268)	0.0232895	03:10:13.097000	0.0398529	0.234261	-1.50319	5.65161	TCOF1;NOLC1;VPS35
							positive regulation of cysteine-type endopeptidase activity involved in apoptotic process (GO:0043280)	0.0105436	02:11:53.311000	0.0228144	0.187815	-1.24068	5.64787	VCP;FAM162A;ANP32B;HSPE1;HSPD1
							regulation of protein localization to Cajal body (GO:1904869)	0.102978	06:41:12.730000	0.13158	0.370124	-2.4826	5.64354	CCT3
							positive regulation of protein kinase A signaling (GO:0010739)	0.0920788	06:29:45.077000	0.119238	0.370124	-2.36412	5.63868	MIF
							regulation of protein ubiquitination (GO:0031396)	0.00774628	0.078499	0.017266	0.171549	-1.15648	5.62111	HSP90AA1;HSP90AB1;UBB;FEM1B;PARK7
							reproductive system development (GO:0061458)	0.0920788	06:29:45.077000	0.119238	0.370124	-2.35307	5.61234	TBX3
							negative regulation of cellular amide metabolic process (GO:0034249)	0.0132284	0.103499	0.0258763	0.190231	-1.29646	5.60767	FXR1;NCL;CALR;CNOT8
							mRNA 3'-end processing (GO:0031124)	0.0126483	0.102331	0.0248462	0.190231	-1.27766	5.58366	ZC3H11A;SRSF3;SRSF6;SRSF7
							positive regulation of nitric oxide biosynthetic process (GO:0045429)	0.0385799	04:22:55.162000	0.0581489	0.283894	-1.71493	5.58213	HSP90AA1;HSP90AB1
							negative regulation of transcription from RNA polymerase II promoter (GO:0000122)	0.00360202	01:11:23.447000	0.0168239	0.170142	-0.991846	5.58038	SPEN;PARP1;WWC2;ARID5B;TBX3;SNW1;CCND1;UBB;DDIT3;MDM2;CALR;FNIP1;LYAR;TAF3;BPTF
							posttranslational protein targeting to endoplasmic reticulum membrane (GO:0006620)	0.0920788	06:29:45.077000	0.119238	0.370124	-2.33956	5.5801	SEC62
							positive regulation of phosphatase activity (GO:0010922)	0.0307434	03:46:33.180000	0.0474177	0.257389	-1.60169	5.57721	HSP90AB1;CALM1
							rRNA modification (GO:0000154)	0.0307434	0.157328	0.0474177	0.257389	-1.5984	5.56574	NHP2;NOP10
							long term synaptic depression (GO:0060292)	0.0810475	06:25:01.459000	0.106721	0.369285	-2.21028	5.55381	PLK2
							positive regulation of ubiquitin-protein ligase activity involved in regulation of mitotic cell cycle transition (GO:0051437)	0.0138252	0.10392	0.0269317	0.195543	-1.29635	5.55	UBB;PSMB3;UBE2C;PSMA7
							negative regulation of developmental process (GO:0051093)	0.0104916	02:11:53.311000	0.020977	0.186597	-1.21769	5.54923	DDIT3;ANP32B;CALR;MIF
							peptide metabolic process (GO:0006518)	0.00872592	02:02:13.987000	0.0192283	0.182507	-1.16608	5.52893	EEF1G;HSP90AA1;GPX1;GSTA4;SOD1
							regulation of monooxygenase activity (GO:0032768)	0.0332776	03:58:03.465000	0.0509067	0.266124	-1.62043	5.51412	HSP90AA1;CALM1
							proteasomal ubiquitin-independent protein catabolic process (GO:0010499)	0.0358906	04:09:27.339000	0.0544848	0.274232	-1.6538	5.50267	PSMB3;PSMA7
							regulation of RNA metabolic process (GO:0051252)	0.01216	0.0989518	0.0221546	0.187815	-1.24578	5.49341	SON;AHNAK;TRA2B
							negative regulation of phosphorylation (GO:0042326)	0.0132284	02:29:02.347000	0.0258763	0.190231	-1.26974	5.49212	CDKN1A;PARK7;ATG14;DYNLL1
							RNA processing (GO:0006396)	0.00911138	02:03:09.459000	0.0232143	0.187815	-1.16893	5.49189	RBM39;SON;SNRPD2;DHX36;SNRPD3;SNRPF;SRSF7
							negative regulation of Wnt signaling pathway (GO:0030178)	0.0192072	0.119447	0.0421434	0.240274	-1.38908	5.49028	UBB;PSMB3;DDIT3;IGFBP2;JADE1;PSMA7
							regulation of mRNA stability (GO:0043488)	0.0197835	02:55:22.057000	0.0402614	0.234261	-1.39849	5.48615	FXR1;ANP32A;UBB;PSMB3;PSMA7
							cytoplasmic sequestering of NF-kappaB (GO:0007253)	0.0920788	06:29:45.077000	0.119238	0.370124	-2.29808	5.48117	TMSB4X
							negative regulation of transforming growth factor beta production (GO:0071635)	0.0810475	06:25:01.459000	0.106721	0.369285	-2.17393	5.46247	HSP90AB1
							oxoacid metabolic process (GO:0043436)	0.0593665	05:41:47.870000	0.0859549	0.356189	-1.92113	5.42532	PPA1;MIF
							positive regulation of nitric oxide metabolic process (GO:1904407)	0.0385799	0.182583	0.0581489	0.283894	-1.66451	5.41801	HSP90AA1;HSP90AB1
							cytoskeleton-dependent intracellular transport (GO:0030705)	0.0413435	04:34:07.051000	0.0618959	0.297065	-1.69605	5.40335	TUBA1B;DYNLL1
							positive regulation of membrane potential (GO:0045838)	0.102978	06:41:12.730000	0.13158	0.370124	-2.36019	5.36528	VCP
							regulation of ubiquitin-protein ligase activity involved in mitotic cell cycle (GO:0051439)	0.0115375	02:21:50.734000	0.0228616	0.187815	-1.20189	5.36302	UBB;PSMB3;UBE2C;PSMA7
							regulation of calcium ion transmembrane transporter activity (GO:1901019)	0.0441792	04:46:42.184000	0.0657228	0.306767	-1.7125	5.34215	AHNAK;CALM1
							cellular hyperosmotic response (GO:0071474)	0.0810475	06:25:01.459000	0.106721	0.369285	-2.12571	5.34131	YBX3
							nucleosome assembly (GO:0006334)	0.0369139	04:15:50.498000	0.0605693	0.29402	-1.61214	5.31871	H2AFX;UBN1;ANP32B
							virion attachment to host cell (GO:0019062)	0.113747	0.286551	0.14375	0.374015	-2.43408	5.29115	HSP90AB1
							regulation of endoplasmic reticulum unfolded protein response (GO:1900101)	0.113747	06:52:37.988000	0.14375	0.374015	-2.42661	5.2749	HSPA5
							negative regulation of gene expression (GO:0010629)	0.00803199	01:56:16.597000	0.0332767	0.212647	-1.09245	5.27032	SPEN;ARID5B;MIF;PA2G4;PARK7;TBX3;FXR1;SNW1;DDIT3;NCL;MDM2;RLIM;CALR;CNOT8;SNX6
							positive regulation of phospholipid biosynthetic process (GO:0071073)	0.0920788	06:29:45.077000	0.119238	0.370124	-2.20758	5.26533	FABP3
							regulation of oxidative stress-induced neuron intrinsic apoptotic signaling pathway (GO:1903376)	0.0810475	06:25:01.459000	0.106721	0.369285	-2.09447	5.26282	PARK7
							regulation of mitochondrion organization (GO:0010821)	0.0209653	0.127017	0.0362293	0.222215	-1.35848	5.25037	ATPIF1;VPS35;SQSTM1
							positive regulation of protein localization to cell surface (GO:2000010)	0.102978	0.27862	0.13158	0.370124	-2.30613	5.24239	HSP90AB1
							negative regulation of ubiquitin protein ligase activity (GO:1904667)	0.0144388	0.107594	0.0280126	0.197125	-1.23406	5.22973	UBB;PSMB3;UBE2C;PSMA7
							gland development (GO:0048732)	0.0132284	02:29:02.347000	0.0258763	0.190231	-1.20241	5.2009	ARID5B;TDGF1;TBX3;SOD1
							protein lipoylation (GO:0009249)	0.102978	06:41:12.730000	0.13158	0.370124	-2.28723	5.19941	GCSH
							negative regulation of hippo signaling (GO:0035331)	0.102978	06:41:12.730000	0.13158	0.370124	-2.28529	5.19501	WWC2
							phospholipid homeostasis (GO:0055091)	0.102978	06:41:12.730000	0.13158	0.370124	-2.28351	5.19095	FABP3
							negative regulation of G1/S transition of mitotic cell cycle (GO:2000134)	0.0358906	04:09:27.339000	0.0544848	0.274232	-1.55782	5.18331	CDKN1A;JADE1
							fructose 1,6-bisphosphate metabolic process (GO:0030388)	0.0920788	06:29:45.077000	0.119238	0.370124	-2.16984	5.1753	ALDOA
							myelin maintenance (GO:0043217)	0.102978	06:41:12.730000	0.13158	0.370124	-2.27564	5.17308	SOD1
							regulation of cyclic nucleotide metabolic process (GO:0030799)	0.0920788	06:29:45.077000	0.119238	0.370124	-2.16468	5.16301	CALM1
							positive regulation of interferon-alpha secretion (GO:1902741)	0.0810475	06:25:01.459000	0.106721	0.369285	-2.05324	5.15922	DHX36
							protein import into mitochondrial inner membrane (GO:0045039)	0.0920788	06:29:45.077000	0.119238	0.370124	-2.1612	5.15471	TIMM13
							nucleotide-excision repair, DNA gap filling (GO:0006297)	0.0332776	03:58:03.465000	0.0509067	0.266124	-1.51303	5.14864	LIG1;UBB
							positive regulation of lymphocyte apoptotic process (GO:0070230)	0.0920788	06:29:45.077000	0.119238	0.370124	-2.15329	5.13582	FNIP1
							B cell mediated immunity (GO:0019724)	0.102978	0.27862	0.13158	0.370124	-2.25558	5.12746	HSPD1
							G1/S transition of mitotic cell cycle (GO:0000082)	0.00907065	02:03:09.459000	0.0199136	0.184881	-1.08896	5.12108	RANBP1;CDKN1A;CCND1;CCNE1;PLK2
							myeloid leukocyte mediated immunity (GO:0002444)	0.113747	06:52:37.988000	0.14375	0.374015	-2.35275	5.11435	PLA2G1B
							MyD88-dependent toll-like receptor signaling pathway (GO:0002755)	0.0500585	05:08:22.819000	0.0736046	0.323137	-1.70419	5.1033	UBB;HSPD1
							negative regulation of alcohol biosynthetic process (GO:1902931)	0.113747	06:52:37.988000	0.14375	0.374015	-2.34619	5.1001	SOD1
							positive regulation of DNA metabolic process (GO:0051054)	0.0177644	02:45:53.067000	0.033802	0.212647	-1.26508	5.09899	PLA2G1B;DHX36;H2AFX;CALR
							interleukin-1 secretion (GO:0050701)	0.113747	06:52:37.988000	0.14375	0.374015	-2.34513	5.0978	S100A13
							regulation of leukocyte activation (GO:0002694)	0.113747	06:52:37.988000	0.14375	0.374015	-2.34039	5.08747	MIF
							positive regulation by host of viral transcription (GO:0043923)	0.0193337	02:52:00.230000	0.0314256	0.206147	-1.28552	5.07252	SNW1;SP1
							negative regulation of protein sumoylation (GO:0033234)	0.113747	06:52:37.988000	0.14375	0.374015	-2.3313	5.06772	PARK7
							nucleoside phosphate catabolic process (GO:1901292)	0.0810475	06:25:01.459000	0.106721	0.369285	-2.01418	5.06107	DCTPP1
							glucocorticoid receptor signaling pathway (GO:0042921)	0.0810475	06:25:01.459000	0.106721	0.369285	-2.01133	5.05391	CALR
							establishment of viral latency (GO:0019043)	0.113747	06:52:37.988000	0.14375	0.374015	-2.32413	5.05214	BANF1
							regulation of transcription from RNA polymerase II promoter in response to hypoxia (GO:0061418)	0.0150694	02:35:43.668000	0.0291191	0.199489	-1.19201	5.00058	UBB;PSMB3;ELOB;PSMA7
							protein localization to organelle (GO:0033365)	0.0304358	03:46:33.180000	0.0550584	0.27513	-1.43103	4.99733	LAMP1;MDM2;CALR;ATP6V1D
							positive regulation of long-term synaptic potentiation (GO:1900273)	0.113747	06:52:37.988000	0.14375	0.374015	-2.29764	4.99456	SQSTM1
							vesicle-mediated transport to the plasma membrane (GO:0098876)	0.0562013	05:30:31.697000	0.0817714	0.344739	-1.73204	4.98623	VPS26A;VPS35
							superoxide metabolic process (GO:0006801)	0.0500585	05:08:22.819000	0.0736046	0.323137	-1.66373	4.98214	PRDX2;SOD1
							establishment of integrated proviral latency (GO:0075713)	0.102978	06:41:12.730000	0.13158	0.370124	-2.19055	4.97965	BANF1
							interleukin-1-mediated signaling pathway (GO:0070498)	0.0285058	0.151822	0.0518874	0.26877	-1.39898	4.97708	UBB;PSMB3;SQSTM1;PSMA7
							regulation of cytoplasmic transport (GO:1903649)	0.102978	06:41:12.730000	0.13158	0.370124	-2.18856	4.97511	DNAJC13
							regulation of nitrogen compound metabolic process (GO:0051171)	0.102978	06:41:12.730000	0.13158	0.370124	-2.18669	4.97086	CACYBP
							response to gamma radiation (GO:0010332)	0.0413435	04:34:07.051000	0.0618959	0.297065	-1.55974	4.96907	MDM2;TLK2
							regulation of establishment of protein localization to mitochondrion (GO:1903747)	0.102978	06:41:12.730000	0.13158	0.370124	-2.17901	4.95342	ATPIF1
							platelet degranulation (GO:0002576)	0.0175112	02:45:24.807000	0.0360685	0.22203	-1.22433	4.95232	TMSB4X;ALDOA;CALM1;MANF;SOD1
							hyperosmotic response (GO:0006972)	0.0920788	06:29:45.077000	0.119238	0.370124	-2.07594	4.95134	YBX3
							positive regulation of protein localization to Cajal body (GO:1904871)	0.102978	06:41:12.730000	0.13158	0.370124	-2.17709	4.94904	CCT3
							negative regulation of leukocyte chemotaxis (GO:0002689)	0.113747	06:52:37.988000	0.14375	0.374015	-2.27238	4.93964	MIF
							Golgi to lysosome transport (GO:0090160)	0.102978	06:41:12.730000	0.13158	0.370124	-2.16821	4.92886	LAMP1
							mast cell activation involved in immune response (GO:0002279)	0.102978	06:41:12.730000	0.13158	0.370124	-2.16713	4.92639	S100A13
							positive regulation of multicellular organism growth (GO:0040018)	0.0920788	06:29:45.077000	0.119238	0.370124	-2.05825	4.90917	PPIB
							regulation of supramolecular fiber organization (GO:1902903)	0.0413435	04:34:07.051000	0.0618959	0.297065	-1.53953	4.9047	GPX1;PARK7
							negative regulation of G2/M transition of mitotic cell cycle (GO:0010972)	0.0400346	04:28:30.203000	0.0652122	0.306767	-1.52065	4.89348	UBB;PSMB3;PSMA7
							antigen processing and presentation of exogenous peptide antigen via MHC class I, TAP-dependent (GO:0002479)	0.0132284	02:29:02.347000	0.0258763	0.190231	-1.12656	4.87282	PDIA3;PSMB3;CALR;PSMA7
							aerobic respiration (GO:0009060)	0.0470849	04:57:39.840000	0.0696267	0.317147	-1.59324	4.86862	MDH2;UQCR10
							positive regulation of bone resorption (GO:0045780)	0.124388	07:01:29.904000	0.155751	0.379113	-2.33462	4.86616	SPP1
							respiratory chain complex III assembly (GO:0017062)	0.113747	06:52:37.988000	0.14375	0.374015	-2.23174	4.85131	UQCR10
							protein-cofactor linkage (GO:0018065)	0.124388	07:01:29.904000	0.155751	0.379113	-2.32237	4.84064	GCSH
							transcription, DNA-templated (GO:0006351)	0.0289392	03:41:15.265000	0.0726425	0.323088	-1.36356	4.83051	PARP1;PTTG1;ELOB;GTF2H1;VEZF1;AFF4;PTMA;TAF3;BPTF
							positive regulation of intracellular steroid hormone receptor signaling pathway (GO:0033145)	0.124388	07:01:29.904000	0.155751	0.379113	-2.3106	4.81611	PARK7
							regulation of mRNA processing (GO:0050684)	0.0470849	04:57:39.840000	0.0696267	0.317147	-1.57517	4.81341	SON;SRSF3
							cellular response to ketone (GO:1901655)	0.0470849	04:57:39.840000	0.0696267	0.317147	-1.57089	4.80034	KLF9;SPP1
							positive regulation of lipid transport (GO:0032370)	0.0920788	0.270661	0.119238	0.370124	-2.01178	4.79831	SPP1
							protein hexamerization (GO:0034214)	0.113747	06:52:37.988000	0.14375	0.374015	-2.20582	4.79495	MAT2A
							positive regulation of transcription from RNA polymerase II promoter in response to stress (GO:0036003)	0.0500585	05:08:22.819000	0.0736046	0.323137	-1.60107	4.7945	HSPA5;DDIT3
							negative regulation of apoptotic signaling pathway (GO:2001234)	0.0449576	04:49:35.960000	0.0724731	0.323088	-1.54233	4.78437	GPX1;PARK7;SLC25A5
							plasma membrane bounded cell projection morphogenesis (GO:0120039)	0.0257478	03:25:51.668000	0.0436531	0.246026	-1.30666	4.78159	UBB;SGK1;MAP4K4
							regulation of microtubule-based movement (GO:0060632)	0.113747	06:52:37.988000	0.14375	0.374015	-2.19627	4.77419	LAMP1
							cellular transition metal ion homeostasis (GO:0046916)	0.0266508	03:29:39.319000	0.0488195	0.262482	-1.3169	4.77369	UBB;ATP6V0D1;ATOX1;SOD1
							arachidonate transport (GO:1903963)	0.102978	06:41:12.730000	0.13158	0.370124	-2.09281	4.75745	PLA2G1B
							protein catabolic process (GO:0030163)	0.0170645	02:44:15.044000	0.0325926	0.210987	-1.16857	4.75694	HSP90AA1;VCP;PSMB3;PSMA7
							central nervous system projection neuron axonogenesis (GO:0021952)	0.124388	07:01:29.904000	0.155751	0.379113	-2.27565	4.74327	PAFAH1B1
							long-chain fatty acid import (GO:0044539)	0.0920788	06:29:45.077000	0.119238	0.370124	-1.98736	4.74008	FABP3
							antigen processing and presentation of exogenous peptide antigen via MHC class I (GO:0042590)	0.0150694	02:35:43.668000	0.0291191	0.199489	-1.12764	4.73056	PDIA3;PSMB3;CALR;PSMA7
							negative regulation of response to reactive oxygen species (GO:1901032)	0.113747	06:52:37.988000	0.14375	0.374015	-2.17603	4.7302	PARK7
							positive regulation of chromosome segregation (GO:0051984)	0.134901	07:11:25.714000	0.167584	0.384699	-2.35513	4.71783	RCC2
							regulation of PERK-mediated unfolded protein response (GO:1903897)	0.102978	0.27862	0.13158	0.370124	-2.0717	4.70946	HSPA5
							positive regulation of vascular endothelial cell proliferation (GO:1905564)	0.113747	06:52:37.988000	0.14375	0.374015	-2.16625	4.70893	SP1
							erythrocyte differentiation (GO:0030218)	0.0692149	06:15:28.389000	0.0988742	0.369285	-1.7619	4.70523	ATPIF1;LYAR
							negative regulation of NIK/NF-kappaB signaling (GO:1901223)	0.113747	06:52:37.988000	0.14375	0.374015	-2.16314	4.70218	TMSB4X
							pteridine-containing compound biosynthetic process (GO:0042559)	0.0920788	06:29:45.077000	0.119238	0.370124	-1.96594	4.68898	ATPIF1
							aldehyde biosynthetic process (GO:0046184)	0.102978	06:41:12.730000	0.13158	0.370124	-2.05961	4.68198	TPI1
							mRNA metabolic process (GO:0016071)	0.0304358	03:46:33.180000	0.0550584	0.27513	-1.33914	4.67646	SON;SNRPD3;SNRPF;SRSF7
							positive regulation of cellular component biogenesis (GO:0044089)	0.0215309	03:02:54.274000	0.0402382	0.234261	-1.21656	4.6695	VCP;SDC4;FNIP1;PFN1
							regulation of megakaryocyte differentiation (GO:0045652)	0.0221106	03:06:31.510000	0.0380189	0.225721	-1.22465	4.668	TNRC6C;KMT2C;DPY30
							protein deglycosylation (GO:0006517)	0.124388	07:01:29.904000	0.155751	0.379113	-2.23773	4.66421	PARK7
							regulation of attachment of spindle microtubules to kinetochore (GO:0051988)	0.124388	07:01:29.904000	0.155751	0.379113	-2.23747	4.66368	RCC2
							negative regulation of response to DNA damage stimulus (GO:2001021)	0.0470849	04:57:39.840000	0.0696267	0.317147	-1.52481	4.65953	MDM2;MIF
							antigen processing and presentation of peptide antigen via MHC class I (GO:0002474)	0.0470849	04:57:39.840000	0.0696267	0.317147	-1.52361	4.65585	PDIA3;CALR
							mitotic G1 DNA damage checkpoint (GO:0031571)	0.124388	07:01:29.904000	0.155751	0.379113	-2.229	4.64601	CCND1
							peptidyl-cysteine modification (GO:0018198)	0.102978	06:41:12.730000	0.13158	0.370124	-2.03162	4.61835	PARK7
							RNA export from nucleus (GO:0006405)	0.0149231	02:35:43.668000	0.0312227	0.206147	-1.09719	4.61352	RANBP1;ZC3H11A;SRSF3;SRSF6;SRSF7
							glycine metabolic process (GO:0006544)	0.124388	07:01:29.904000	0.155751	0.379113	-2.21118	4.60888	GCSH
							positive regulation of ryanodine-sensitive calcium-release channel activity (GO:0060316)	0.102978	06:41:12.730000	0.13158	0.370124	-2.02351	4.59992	CALM1
							ubiquitin-dependent protein catabolic process (GO:0006511)	0.00856023	02:02:13.987000	0.0267258	0.19488	-0.964307	4.59071	RANBP1;VCP;UBB;PSMB3;UBE2C;DDIT3;MDM2;RLIM;SQSTM1;PSMA7
							cellular response to UV (GO:0034644)	0.0483988	05:03:37.005000	0.077506	0.335709	-1.50572	4.55976	CDKN1A;PARP1;CRIP1
							regulation of protein acetylation (GO:1901983)	0.113747	06:52:37.988000	0.14375	0.374015	-2.09536	4.55483	PARK7
							positive regulation of protein catabolic process (GO:0045732)	0.0170645	02:44:15.044000	0.0325926	0.210987	-1.11878	4.55427	HSP90AA1;VCP;PLK2;VPS35
							regulation of phosphorylation (GO:0042325)	0.0149231	02:35:43.668000	0.0312227	0.206147	-1.08146	4.54739	CDKN1A;MIF;ATG14;DYNLL1;FNIP1
							proteasomal protein catabolic process (GO:0010498)	0.0251482	03:21:43.593000	0.0572055	0.282536	-1.22904	4.5265	VCP;UBB;PSMB3;UBE2C;DDIT3;RLIM;PSMA7
							stress-induced premature senescence (GO:0090400)	0.102978	06:41:12.730000	0.13158	0.370124	-1.98967	4.52298	CDKN1A
							amyloid fibril formation (GO:1990000)	0.102978	06:41:12.730000	0.13158	0.370124	-1.98777	4.51868	MDM2
							negative regulation of substrate adhesion-dependent cell spreading (GO:1900025)	0.145288	07:20:27.978000	0.179252	0.391452	-2.34238	4.51854	RCC2
							intrinsic apoptotic signaling pathway (GO:0097193)	0.0345224	04:04:06.418000	0.0617079	0.297065	-1.34172	4.51643	CDKN1A;HINT1;DDIT3;CRIP1
							negative regulation of retinoic acid receptor signaling pathway (GO:0048387)	0.0920788	06:29:45.077000	0.119238	0.370124	-1.89115	4.5106	CALR
							negative regulation of cellular protein metabolic process (GO:0032269)	0.0231639	03:10:13.097000	0.0429947	0.243493	-1.19613	4.50362	FXR1;NCL;CALR;CNOT8
							positive regulation of phospholipid metabolic process (GO:1903727)	0.0470849	04:57:39.840000	0.0696267	0.317147	-1.46947	4.49042	FABP3;ATG14
							positive regulation of reactive oxygen species biosynthetic process (GO:1903428)	0.0530979	05:22:21.030000	0.0776538	0.335709	-1.52789	4.4853	HSP90AA1;HSP90AB1
							G1 DNA damage checkpoint (GO:0044783)	0.124388	07:01:29.904000	0.155751	0.379113	-2.15009	4.48155	CCND1
							G2/M transition of mitotic cell cycle (GO:0000086)	0.0186245	0.119447	0.0381295	0.225721	-1.11924	4.45825	CDKN1A;HSP90AA1;UBB;DYNLL1;PAFAH1B1
							modulation by host of viral genome replication (GO:0044827)	0.134901	07:11:25.714000	0.167584	0.384699	-2.22352	4.4542	PPIB
							cellular biogenic amine metabolic process (GO:0006576)	0.124388	07:01:29.904000	0.155751	0.379113	-2.1278	4.43509	TRH
							regulation of establishment of planar polarity (GO:0090175)	0.0231639	0.132096	0.0429947	0.243493	-1.17679	4.43079	UBB;PSMB3;PFN1;PSMA7
							mRNA-containing ribonucleoprotein complex export from nucleus (GO:0071427)	0.0334723	03:58:45.135000	0.0600073	0.292127	-1.30354	4.42817	ZC3H11A;SRSF3;SRSF6;SRSF7
							positive regulation of telomerase activity (GO:0051973)	0.0692149	06:15:28.389000	0.0988742	0.369285	-1.65639	4.42345	HSP90AA1;HSP90AB1
							negative regulation of nucleocytoplasmic transport (GO:0046823)	0.134901	07:11:25.714000	0.167584	0.384699	-2.2049	4.41689	PARK7
							inner ear receptor stereocilium organization (GO:0060122)	0.0920788	0.270661	0.119238	0.370124	-1.85082	4.41442	SOD1
							endosomal transport (GO:0016197)	0.0213553	0.127017	0.0495171	0.265393	-1.14429	4.40146	UBB;DPY30;VPS26A;VPS35;ATG14;SQSTM1;SNX6
							peptidyl-amino acid modification (GO:0018193)	0.113747	06:52:37.988000	0.14375	0.374015	-2.02407	4.39988	MDM2
							protein depolymerization (GO:0051261)	0.0385799	04:22:55.162000	0.0581489	0.283894	-1.35053	4.396	CFL1;STMN2
							adipose tissue development (GO:0060612)	0.113747	06:52:37.988000	0.14375	0.374015	-2.0221	4.39559	ARID5B
							regulation of dendritic spine development (GO:0060998)	0.0562013	0.229534	0.0817714	0.344739	-1.52574	4.39233	FXR1;CFL1
							transcytosis (GO:0045056)	0.134901	07:11:25.714000	0.167584	0.384699	-2.19243	4.3919	VPS35
							cellular response to thyroid hormone stimulus (GO:0097067)	0.124388	07:01:29.904000	0.155751	0.379113	-2.10673	4.39117	KLF9
							modulation by host of viral transcription (GO:0043921)	0.0441792	04:46:42.184000	0.0657228	0.306767	-1.40727	4.38998	SNW1;SP1
							nuclear migration (GO:0007097)	0.113747	06:52:37.988000	0.14375	0.374015	-2.01257	4.37487	PAFAH1B1
							mitochondrial respiratory chain complex III assembly (GO:0034551)	0.113747	06:52:37.988000	0.14375	0.374015	-2.00766	4.36421	UQCR10
							positive regulation of transcription of nuclear large rRNA transcript from RNA polymerase I promoter (GO:1901838)	0.113747	0.286551	0.14375	0.374015	-2.0061	4.36081	NCL
							nuclear-transcribed mRNA poly(A) tail shortening (GO:0000289)	0.0500585	05:08:22.819000	0.0736046	0.323137	-1.45555	4.35874	EIF4A2;CNOT8
							arachidonic acid secretion (GO:0050482)	0.102978	06:41:12.730000	0.13158	0.370124	-1.91675	4.35724	PLA2G1B
							negative regulation of cellular macromolecule biosynthetic process (GO:2000113)	0.00933058	02:04:44.530000	0.0341063	0.212647	-0.930253	4.34843	SPEN;ARID5B;PA2G4;TBX3;FXR1;SNW1;DDIT3;NCL;MDM2;RLIM;CALR;CNOT8;SNX6
							regulation of cytoplasmic translation (GO:2000765)	0.124388	0.292707	0.155751	0.379113	-2.08576	4.34746	YBX3
							anterograde axonal transport (GO:0008089)	0.0562013	05:30:31.697000	0.0817714	0.344739	-1.49864	4.3143	FXR1;SOD1
							gene silencing by miRNA (GO:0035195)	0.0562013	05:30:31.697000	0.0817714	0.344739	-1.49732	4.31049	TNRC6C;CNOT8
							positive regulation of DNA replication (GO:0045740)	0.0692149	06:15:28.389000	0.0988742	0.369285	-1.61304	4.30769	PLA2G1B;CALR
							retina homeostasis (GO:0001895)	0.0795537	0.267378	0.112295	0.370124	-1.69755	4.29706	PRDX1;SOD1
							negative regulation of necrotic cell death (GO:0060547)	0.0920788	06:29:45.077000	0.119238	0.370124	-1.79909	4.29103	YBX3
							regulation of intracellular steroid hormone receptor signaling pathway (GO:0033143)	0.0441792	04:46:42.184000	0.0657228	0.306767	-1.3752	4.28995	CALR;PARK7
							autophagosome maturation (GO:0097352)	0.0332776	03:58:03.465000	0.0509067	0.266124	-1.25712	4.27782	VCP;ATG14
							cellular response to ATP (GO:0071318)	0.124388	07:01:29.904000	0.155751	0.379113	-2.05165	4.27635	HSP90B1
							response to axon injury (GO:0048678)	0.134901	07:11:25.714000	0.167584	0.384699	-2.13374	4.27433	SOD1
							regulation of DNA damage checkpoint (GO:2000001)	0.124388	07:01:29.904000	0.155751	0.379113	-2.04075	4.25364	FEM1B
							Rap protein signal transduction (GO:0032486)	0.124388	07:01:29.904000	0.155751	0.379113	-2.03707	4.24598	PLK2
							positive regulation of bone remodeling (GO:0046852)	0.124388	07:01:29.904000	0.155751	0.379113	-2.03337	4.23827	SPP1
							positive regulation of natural killer cell activation (GO:0032816)	0.124388	07:01:29.904000	0.155751	0.379113	-2.02914	4.22943	LAMP1
							DNA-templated transcription, elongation (GO:0006354)	0.0424053	04:39:38.494000	0.0743149	0.325415	-1.33721	4.22623	ELOB;GTF2H1;AFF4;TAF3
							negative regulation of reproductive process (GO:2000242)	0.124388	07:01:29.904000	0.155751	0.379113	-2.02751	4.22605	CALR
							brain morphogenesis (GO:0048854)	0.134901	07:11:25.714000	0.167584	0.384699	-2.10922	4.22523	PAFAH1B1
							negative regulation of interleukin-8 secretion (GO:2000483)	0.0920788	0.270661	0.119238	0.370124	-1.76365	4.2065	TMSB4X
							glycerol metabolic process (GO:0006071)	0.134901	07:11:25.714000	0.167584	0.384699	-2.09763	4.20201	TPI1
							cytokine-mediated signaling pathway (GO:0019221)	0.0212938	03:02:54.274000	0.0716687	0.32213	-1.09098	4.19955	IFITM3;CDKN1A;HSP90AA1;RPLP0;MIF;PSMA7;HSP90B1;SOD1;CCND1;UBB;PSMB3;TMSB4X;CFL1;SQSTM1
							apoptotic mitochondrial changes (GO:0008637)	0.0658752	06:05:27.573000	0.0945088	0.369285	-1.54359	4.19857	VPS35;HSPD1
							regulation of protein export from nucleus (GO:0046825)	0.0562013	05:30:31.697000	0.0817714	0.344739	-1.45586	4.19116	ANP32B;PARK7
							regulation of endothelial cell differentiation (GO:0045601)	0.113747	06:52:37.988000	0.14375	0.374015	-1.9249	4.18431	VEZF1
							cytochrome complex assembly (GO:0017004)	0.124388	07:01:29.904000	0.155751	0.379113	-1.99855	4.16567	COX10
							histone exchange (GO:0043486)	0.072609	06:25:01.459000	0.103295	0.369285	-1.58811	4.16508	CENPM;ANP32B
							organelle transport along microtubule (GO:0072384)	0.0562013	05:30:31.697000	0.0817714	0.344739	-1.44287	4.15377	UBB;PAFAH1B1
							positive regulation of oxidative stress-induced cell death (GO:1903209)	0.0810475	06:25:01.459000	0.106721	0.369285	-1.65303	4.15361	SOD1
							regulation of hematopoietic progenitor cell differentiation (GO:1901532)	0.0674468	06:11:38.999000	0.104826	0.369285	-1.53814	4.14747	UBB;PSMB3;PSMA7
							coenzyme biosynthetic process (GO:0009108)	0.0500585	05:08:22.819000	0.0736046	0.323137	-1.38228	4.13933	MAT2A;ATPIF1
							regulation of dopamine receptor signaling pathway (GO:0060159)	0.102978	06:41:12.730000	0.13158	0.370124	-1.82038	4.13815	VPS35
							'de novo' posttranslational protein folding (GO:0051084)	0.0530979	05:22:21.030000	0.0776538	0.335709	-1.40824	4.13407	HSPA5;HSPE1
							mitochondrial respiratory chain complex III biogenesis (GO:0097033)	0.124388	07:01:29.904000	0.155751	0.379113	-1.98129	4.1297	UQCR10
							positive regulation of DNA biosynthetic process (GO:2000573)	0.0296862	0.156636	0.0496794	0.265425	-1.17394	4.12885	CCT3;HSP90AA1;HSP90AB1
							positive regulation of leukocyte degranulation (GO:0043302)	0.134901	07:11:25.714000	0.167584	0.384699	-2.05824	4.1231	LAMP1
							regulation of cellular respiration (GO:0043457)	0.124388	07:01:29.904000	0.155751	0.379113	-1.97662	4.11997	VCP
							regulation of cell death (GO:0010941)	0.0294614	03:44:32.731000	0.05346	0.274232	-1.16839	4.1182	UBB;VPS35;PARK7;SRSF6
							transcription elongation from RNA polymerase II promoter (GO:0006368)	0.0285058	03:38:37.461000	0.0518874	0.26877	-1.1564	4.11406	ELOB;GTF2H1;AFF4;TAF3
							actin filament depolymerization (GO:0030042)	0.124388	0.292707	0.155751	0.379113	-1.96992	4.10601	CFL1
							iron ion homeostasis (GO:0055072)	0.0416435	04:35:21.615000	0.0675934	0.313774	-1.29076	4.10284	UBB;ATP6V0D1;SOD1
							regulation of interleukin-8 production (GO:0032677)	0.0658752	06:05:27.573000	0.0945088	0.369285	-1.50835	4.10269	DDIT3;PARK7
							negative regulation of receptor activity (GO:2000272)	0.0593665	05:41:47.870000	0.0859549	0.356189	-1.45187	4.10011	CALM1;SNX6
							endosome to lysosome transport via multivesicular body sorting pathway (GO:0032510)	0.0810475	06:25:01.459000	0.106721	0.369285	-1.6307	4.09749	VCP
							response to insulin (GO:0032868)	0.0556554	05:30:31.697000	0.0880153	0.36384	-1.41154	4.07733	PKM;PARP1;PLA2G1B
							positive regulation of cytokine production (GO:0001819)	0.0508639	05:11:53.037000	0.0999729	0.369285	-1.36801	4.07475	DDIT3;DHX36;MIF;PARK7;HSPD1;SOD1
							regulation of protein complex assembly (GO:0043254)	0.0594671	05:41:47.870000	0.0934836	0.369285	-1.44139	4.06807	HSP90AA1;VCP;FNIP1
							positive regulation of protein dephosphorylation (GO:0035307)	0.0562013	05:30:31.697000	0.0817714	0.344739	-1.40765	4.05236	HSP90AB1;CALM1
							regulation of endothelial cell chemotaxis (GO:2001026)	0.155551	07:29:18.621000	0.190757	0.398153	-2.17398	4.04529	TMSB4X
							regulation of cysteine-type endopeptidase activity involved in apoptotic signaling pathway (GO:2001267)	0.113747	06:52:37.988000	0.14375	0.374015	-1.85854	4.04005	PARK7
							response to interleukin-6 (GO:0070741)	0.145288	07:20:27.978000	0.179252	0.391452	-2.09082	4.03326	TDGF1
							regulation of transcription from RNA polymerase II promoter in response to stress (GO:0043618)	0.0266508	03:29:39.319000	0.0488195	0.262482	-1.11252	4.03282	UBB;PSMB3;ELOB;PSMA7
							negative regulation of intrinsic apoptotic signaling pathway in response to DNA damage by p53 class mediator (GO:1902166)	0.134901	07:11:25.714000	0.167584	0.384699	-2.01028	4.02702	MIF
							skeletal system development (GO:0001501)	0.0323684	03:57:05.955000	0.0626754	0.299959	-1.17295	4.02391	TCOF1;ANKRD11;PRDX1;PPIB;TBX3
							mast cell mediated immunity (GO:0002448)	0.113747	06:52:37.988000	0.14375	0.374015	-1.84992	4.02131	S100A13
							response to increased oxygen levels (GO:0036296)	0.0920788	06:29:45.077000	0.119238	0.370124	-1.68353	4.0154	ATP6V0D1
							modification-dependent protein catabolic process (GO:0019941)	0.0284729	03:38:37.461000	0.055864	0.278337	-1.12802	4.01439	RANBP1;UBE2C;MDM2;RLIM;SQSTM1
							regulation of nitric-oxide synthase activity (GO:0050999)	0.072609	06:25:01.459000	0.103295	0.369285	-1.52835	4.00835	HSP90AA1;CALM1
							negative regulation of extrinsic apoptotic signaling pathway via death domain receptors (GO:1902042)	0.0562013	05:30:31.697000	0.0817714	0.344739	-1.38982	4.00103	GPX1;PARK7
							positive regulation of ruffle assembly (GO:1900029)	0.145288	07:20:27.978000	0.179252	0.391452	-2.0716	3.9962	PFN1
							positive regulation of cellular process (GO:0048522)	0.0236257	03:10:13.097000	0.0712186	0.320956	-1.06612	3.99308	RPS9;HSP90AB1;CCND1;PLA2G1B;MDM2;NAP1L1;CALR;PA2G4;CNOT8;SLC25A5;TDGF1;TBX3
							cellular response to oxygen levels (GO:0071453)	0.113747	06:52:37.988000	0.14375	0.374015	-1.81961	3.95543	ATP6V0D1
							transcription initiation from RNA polymerase II promoter (GO:0006367)	0.0449806	04:49:35.960000	0.0841222	0.352028	-1.26622	3.92721	CDKN1A;SNW1;CCND1;GTF2H1;TAF3
							regulation of hydrogen peroxide-induced cell death (GO:1903205)	0.134901	0.299603	0.167584	0.384699	-1.95931	3.92491	PARK7
							negative regulation of nucleic acid-templated transcription (GO:1903507)	0.0190237	02:52:00.230000	0.0563917	0.279328	-0.990156	3.92307	EIF4A2;SPEN;SNW1;DDIT3;MDM2;RLIM;ARID5B;CALR;PA2G4;TBX3;SNX6
							regulation of hippo signaling (GO:0035330)	0.134901	07:11:25.714000	0.167584	0.384699	-1.95029	3.90685	WWC2
							vasodilation (GO:0042311)	0.113747	06:52:37.988000	0.14375	0.374015	-1.79106	3.89337	SOD1
							icosanoid biosynthetic process (GO:0046456)	0.134901	07:11:25.714000	0.167584	0.384699	-1.9434	3.89304	PLA2G1B
							mesoderm morphogenesis (GO:0048332)	0.124388	07:01:29.904000	0.155751	0.379113	-1.86669	3.89083	TBX3
							positive regulation of peptidyl-serine phosphorylation (GO:0033138)	0.0802729	06:25:01.459000	0.122788	0.370124	-1.54163	3.88849	MIF;PARK7;FNIP1
							antibacterial humoral response (GO:0019731)	0.0692149	06:15:28.389000	0.0988742	0.369285	-1.45477	3.88502	PLA2G1B;RPL39
							positive regulation of keratinocyte differentiation (GO:0045618)	0.145288	0.305879	0.179252	0.391452	-2.01002	3.87741	NME2
							protein kinase B signaling (GO:0043491)	0.0692149	06:15:28.389000	0.0988742	0.369285	-1.44608	3.8618	CDKN1A;MDM2
							response to leptin (GO:0044321)	0.102978	06:41:12.730000	0.13158	0.370124	-1.6961	3.85564	CCND1
							macrophage differentiation (GO:0030225)	0.134901	0.299603	0.167584	0.384699	-1.92247	3.85111	PARP1
							serine family amino acid catabolic process (GO:0009071)	0.113747	06:52:37.988000	0.14375	0.374015	-1.77082	3.84937	GCSH
							mitotic spindle elongation (GO:0000022)	0.134901	07:11:25.714000	0.167584	0.384699	-1.91941	3.845	CDC14A
							endosome organization (GO:0007032)	0.072609	06:25:01.459000	0.103295	0.369285	-1.46537	3.84318	DNAJC13;SQSTM1
							protein peptidyl-prolyl isomerization (GO:0000413)	0.0760559	0.267378	0.107769	0.370124	-1.49117	3.84167	PPIB;FKBP3
							ubiquitin-dependent ERAD pathway (GO:0030433)	0.0339239	04:01:13.077000	0.0560887	0.278639	-1.13441	3.83844	VCP;HSPA5;HSP90B1
							positive regulation of Wnt signaling pathway (GO:0030177)	0.0277314	0.150529	0.0545558	0.274232	-1.06865	3.83131	VCP;UBB;PSMB3;WNK1;PSMA7
							cellular response to glucose starvation (GO:0042149)	0.0625918	05:52:50.685000	0.0902016	0.367909	-1.38248	3.83101	HSPA5;ATG14
							regulation of oxidative stress-induced cell death (GO:1903201)	0.113747	0.286551	0.14375	0.374015	-1.75446	3.81381	PARK7
							tetrahydrofolate metabolic process (GO:0046653)	0.155551	07:29:18.621000	0.190757	0.398153	-2.04745	3.80985	ATPIF1
							regulation of ubiquitin-protein transferase activity (GO:0051438)	0.0562013	05:30:31.697000	0.0817714	0.344739	-1.32323	3.80935	FEM1B;PARK7
							regulation of dendritic cell chemotaxis (GO:2000508)	0.0810475	06:25:01.459000	0.106721	0.369285	-1.51463	3.80584	CALR
							ion transmembrane transport (GO:0034220)	0.0499605	05:08:22.819000	0.0984109	0.369285	-1.268	3.79959	ATP6V0B;UBB;ATP6V0D1;SGK1;ATP6V1D;ATP6V1C1
							positive regulation of dendritic cell chemotaxis (GO:2000510)	0.0920788	06:29:45.077000	0.119238	0.370124	-1.58004	3.76857	CALR
							negative regulation of mitochondrion organization (GO:0010823)	0.0625918	05:52:50.685000	0.0902016	0.367909	-1.3586	3.76486	GPX1;SLC25A5
							poly(A)+ mRNA export from nucleus (GO:0016973)	0.155551	07:29:18.621000	0.190757	0.398153	-2.02063	3.75995	ZC3H11A
							regulation of cell differentiation (GO:0045595)	0.0595145	05:41:47.870000	0.100868	0.369285	-1.3314	3.75659	HSP90AB1;OCIAD1;ANP32B;PA2G4
							endonucleolytic cleavage of tricistronic rRNA transcript (SSU-rRNA, 5.8S rRNA, LSU-rRNA) (GO:0000479)	0.134901	07:11:25.714000	0.167584	0.384699	-1.87525	3.75654	RPS21
							male meiosis I (GO:0007141)	0.124388	07:01:29.904000	0.155751	0.379113	-1.80157	3.75512	SYCP3
							negative regulation of ATP metabolic process (GO:1903579)	0.145288	07:20:27.978000	0.179252	0.391452	-1.93983	3.742	PARP1
							glycogen metabolic process (GO:0005977)	0.0625918	05:52:50.685000	0.0902016	0.367909	-1.34472	3.72639	UBB;CALM1
							malate metabolic process (GO:0006108)	0.0920788	06:29:45.077000	0.119238	0.370124	-1.56155	3.72447	MDH2
							positive regulation of DNA repair (GO:0045739)	0.0795537	06:25:01.459000	0.112295	0.370124	-1.46528	3.70909	PARP1;H2AFX
							mitotic nuclear envelope reassembly (GO:0007084)	0.124388	07:01:29.904000	0.155751	0.379113	-1.77836	3.70673	BANF1
							regulation of nuclear-transcribed mRNA poly(A) tail shortening (GO:0060211)	0.134901	0.299603	0.167584	0.384699	-1.83338	3.67265	TNRC6C
							positive regulation of DNA binding (GO:0043388)	0.0658752	06:05:27.573000	0.0945088	0.369285	-1.34657	3.66267	PARK7;NME1
							DNA topological change (GO:0006265)	0.113747	06:52:37.988000	0.14375	0.374015	-1.68373	3.66006	TOP3B
							regulation of mitotic centrosome separation (GO:0046602)	0.134901	07:11:25.714000	0.167584	0.384699	-1.8253	3.65648	RANBP1
							regulation of cyclin-dependent protein kinase activity (GO:1904029)	0.0692149	06:15:28.389000	0.0988742	0.369285	-1.36488	3.64496	CDKN1A;GTF2H1
							mitochondrial fragmentation involved in apoptotic process (GO:0043653)	0.113747	06:52:37.988000	0.14375	0.374015	-1.67565	3.64249	VPS35
							inorganic cation transmembrane transport (GO:0098662)	0.0277314	0.150529	0.0545558	0.274232	-1.0091	3.61781	COX8A;ATP6V0B;ATP6V0D1;ATP6V1C1;ATP5J2
							exit from mitosis (GO:0010458)	0.145288	07:20:27.978000	0.179252	0.391452	-1.87157	3.61033	UBE2C
							negative regulation of intrinsic apoptotic signaling pathway (GO:2001243)	0.0400346	04:28:30.203000	0.0652122	0.306767	-1.1218	3.60996	MDM2;PARK7;YBX3
							regulation of B cell apoptotic process (GO:0002902)	0.124388	07:01:29.904000	0.155751	0.379113	-1.72734	3.60038	FNIP1
							negative regulation of microtubule polymerization (GO:0031115)	0.113747	0.286551	0.14375	0.374015	-1.6553	3.59825	STMN2
							regulation of necrotic cell death (GO:0010939)	0.155551	07:29:18.621000	0.190757	0.398153	-1.93309	3.59706	UBB
							positive regulation of centrosome cycle (GO:0046607)	0.0810475	06:25:01.459000	0.106721	0.369285	-1.42875	3.59004	RANBP1
							internal protein amino acid acetylation (GO:0006475)	0.134901	07:11:25.714000	0.167584	0.384699	-1.78147	3.56867	MDH2
							alternative mRNA splicing, via spliceosome (GO:0000380)	0.145288	07:20:27.978000	0.179252	0.391452	-1.84308	3.55537	SRSF6
							autophagy of mitochondrion (GO:0000422)	0.0866953	06:29:45.077000	0.121489	0.370124	-1.45145	3.5493	ATG14;SQSTM1
							embryonic forelimb morphogenesis (GO:0035115)	0.113747	06:52:37.988000	0.14375	0.374015	-1.63223	3.54811	TBX3
							neural crest cell development (GO:0014032)	0.0692149	06:15:28.389000	0.0988742	0.369285	-1.32395	3.53567	TCOF1;NOLC1
							negative regulation of muscle cell differentiation (GO:0051148)	0.175711	07:52:24.248000	0.213289	0.409929	-2.03278	3.53484	TBX3
							tetrahydrofolate interconversion (GO:0035999)	0.0920788	06:29:45.077000	0.119238	0.370124	-1.47888	3.52729	ATPIF1
							positive regulation of ion transmembrane transport (GO:0034767)	0.113747	06:52:37.988000	0.14375	0.374015	-1.62207	3.52601	WNK1
							cellular response to tumor necrosis factor (GO:0071356)	0.0305553	03:46:33.180000	0.0637329	0.304164	-1.01015	3.52363	UBB;PSMB3;TMSB4X;TDGF1;YBX3;PSMA7
							chondroitin sulfate catabolic process (GO:0030207)	0.155551	07:29:18.621000	0.190757	0.398153	-1.8892	3.51538	HEXA
							cellular response to increased oxygen levels (GO:0036295)	0.134901	07:11:25.714000	0.167584	0.384699	-1.75009	3.5058	ATP6V0D1
							regulation of cholesterol biosynthetic process (GO:0045540)	0.0866953	0.270661	0.121489	0.370124	-1.43255	3.50308	SP1;SOD1
							cellular respiration (GO:0045333)	0.0324782	03:57:11.622000	0.0539103	0.274232	-1.02174	3.50171	MDH2;UQCR10;COX10
							cell-cell junction maintenance (GO:0045217)	0.124388	07:01:29.904000	0.155751	0.379113	-1.6787	3.499	PLEKHA7
							cellular copper ion homeostasis (GO:0006878)	0.124388	07:01:29.904000	0.155751	0.379113	-1.6764	3.4942	ATOX1
							Wnt signaling pathway, calcium modulating pathway (GO:0007223)	0.072609	06:25:01.459000	0.103295	0.369285	-1.32841	3.48398	TNRC6C;CALM1
							protein localization to kinetochore (GO:0034501)	0.145288	07:20:27.978000	0.179252	0.391452	-1.8019	3.47593	RCC2
							negative regulation of reactive oxygen species biosynthetic process (GO:1903427)	0.155551	07:29:18.621000	0.190757	0.398153	-1.86771	3.4754	PARK7
							negative regulation of focal adhesion assembly (GO:0051895)	0.165692	07:41:42.175000	0.202102	0.404919	-1.93206	3.47313	RCC2
							purine nucleobase metabolic process (GO:0006144)	0.134901	07:11:25.714000	0.167584	0.384699	-1.73139	3.46836	PAICS
							mRNA transcription from RNA polymerase II promoter (GO:0042789)	0.18561	07:59:31.312000	0.224319	0.4188	-2.04134	3.43783	DDIT3
							regulation of neuron death (GO:1901214)	0.0575462	05:35:12.893000	0.0907321	0.367909	-1.20376	3.43695	UBB;VPS35;PARK7
							cellular response to decreased oxygen levels (GO:0036294)	0.0432846	04:43:54.575000	0.0700138	0.317209	-1.09018	3.42313	FAM162A;MDM2;AQP3
							regulation of myeloid cell differentiation (GO:0045637)	0.0449576	04:49:35.960000	0.0724731	0.323088	-1.09891	3.40884	TNRC6C;KMT2C;DPY30
							positive regulation of mitochondrion organization (GO:0010822)	0.0700368	06:17:25.289000	0.116748	0.370124	-1.27721	3.39577	FAM162A;TOMM7;VPS35;PARK7
							regulation of extrinsic apoptotic signaling pathway via death domain receptors (GO:1902041)	0.0831007	06:27:15.528000	0.116868	0.370124	-1.36107	3.38593	GPX1;FEM1B
							regulation of cell communication by electrical coupling (GO:0010649)	0.145288	0.305879	0.179252	0.391452	-1.74888	3.37366	CALM1
							regulation of macrophage chemotaxis (GO:0010758)	0.175711	07:52:24.248000	0.213289	0.409929	-1.93444	3.36383	MIF
							regulation of chromatin organization (GO:1902275)	0.124388	07:01:29.904000	0.155751	0.379113	-1.61309	3.36224	TLK2
							succinate metabolic process (GO:0006105)	0.102978	06:41:12.730000	0.13158	0.370124	-1.47747	3.35863	SUCLG1
							regulation of substrate adhesion-dependent cell spreading (GO:1900024)	0.0903359	06:29:45.077000	0.126153	0.370124	-1.39018	3.34231	RCC2;CALR
							mitochondrion transport along microtubule (GO:0047497)	0.145288	07:20:27.978000	0.179252	0.391452	-1.73242	3.34191	UBB
							regulation of cyclin-dependent protein serine/threonine kinase activity (GO:0000079)	0.0483988	05:03:37.005000	0.077506	0.335709	-1.10341	3.34142	CDKN1A;CCND1;GTF2H1
							protein localization to endoplasmic reticulum (GO:0070972)	0.155551	07:29:18.621000	0.190757	0.398153	-1.79423	3.33867	HSPA5
							positive regulation of developmental process (GO:0051094)	0.0486072	05:04:08.660000	0.0840568	0.352028	-1.10384	3.33799	HSP90AB1;VPS35;PA2G4;SRSF6
							transmembrane transport (GO:0055085)	0.0399628	04:28:30.203000	0.0957751	0.369285	-1.03554	3.33425	ATP6V0B;VCP;UBB;PSMB3;ATP6V0D1;SGK1;ATP6V1D;ATP6V1C1;PSMA7
							isotype switching (GO:0045190)	0.134901	07:11:25.714000	0.167584	0.384699	-1.66264	3.33062	HSPD1
							regulation of nitric oxide biosynthetic process (GO:0045428)	0.0593665	05:41:47.870000	0.0859549	0.356189	-1.1775	3.3253	HSP90AA1;HSP90AB1
							negative regulation of endoplasmic reticulum unfolded protein response (GO:1900102)	0.124388	07:01:29.904000	0.155751	0.379113	-1.59343	3.32127	HSPA5
							negative regulation of cell cycle G2/M phase transition (GO:1902750)	0.0519653	05:17:50.450000	0.0826881	0.34774	-1.12213	3.31832	UBB;PSMB3;PSMA7
							positive regulation of endothelial cell chemotaxis (GO:2001028)	0.155551	07:29:18.621000	0.190757	0.398153	-1.78198	3.31586	TMSB4X
							purine nucleoside monophosphate biosynthetic process (GO:0009127)	0.145288	07:20:27.978000	0.179252	0.391452	-1.71768	3.31346	PAICS
							positive regulation of phagocytosis (GO:0050766)	0.0831007	0.26893	0.116868	0.370124	-1.33099	3.31111	CALR;LYAR
							regulation of protein modification process (GO:0031399)	0.0940207	06:33:24.361000	0.130859	0.370124	-1.39776	3.30463	ATG14;FNIP1
							cytosolic transport (GO:0016482)	0.0552832	05:30:31.697000	0.0943916	0.369285	-1.13855	3.29642	LAMP1;VPS26A;VPS35;SNX6
							positive regulation of receptor activity (GO:2000273)	0.0760559	06:25:01.459000	0.107769	0.370124	-1.27815	3.29287	PARK7;CALM1
							regulation of I-kappaB kinase/NF-kappaB signaling (GO:0043122)	0.0375933	04:19:48.872000	0.0765839	0.334489	-1.00293	3.29053	UBB;EEF1D;PLK2;MIER1;S100A13;SQSTM1
							regulation of cellular amide metabolic process (GO:0034248)	0.0795537	06:25:01.459000	0.112295	0.370124	-1.29915	3.28857	TCOF1;NOLC1
							negative regulation of epidermal growth factor-activated receptor activity (GO:0007175)	0.155551	07:29:18.621000	0.190757	0.398153	-1.76637	3.28682	SNX6
							positive regulation of homeostatic process (GO:0032846)	0.0802729	06:25:01.459000	0.122788	0.370124	-1.30077	3.28097	PLA2G1B;DHX36;SPP1
							regulation of IRE1-mediated unfolded protein response (GO:1903894)	0.145288	07:20:27.978000	0.179252	0.391452	-1.69654	3.27269	HSPA5
							prostanoid biosynthetic process (GO:0046457)	0.155551	07:29:18.621000	0.190757	0.398153	-1.75305	3.26204	MIF
							positive regulation of protein phosphorylation (GO:0001934)	0.0620885	0.245031	0.139031	0.374015	-1.17298	3.25993	CDKN1A;CCND1;RPLP1;MIF;PARK7;ATG14;CALM1;FNIP1;TDGF1
							positive regulation of lyase activity (GO:0051349)	0.145288	0.305879	0.179252	0.391452	-1.68401	3.24852	PARK7
							mitochondrial genome maintenance (GO:0000002)	0.155551	07:29:18.621000	0.190757	0.398153	-1.74295	3.24324	PARP1
							mRNA transport (GO:0051028)	0.0377865	04:20:24.833000	0.0669611	0.31169	-0.988915	3.23949	ZC3H11A;SRSF3;SRSF6;SRSF7
							regulation of transferase activity (GO:0051338)	0.165692	07:41:42.175000	0.202102	0.404919	-1.80182	3.23899	FEM1B
							DNA repair (GO:0006281)	0.060318	05:45:36.052000	0.122766	0.370124	-1.15341	3.23893	VCP;LIG1;PARP1;UBB;H2AFX;GTF2H1;PARK7
							copper ion transport (GO:0006825)	0.165692	07:41:42.175000	0.202102	0.404919	-1.80008	3.23587	ATOX1
							neuromuscular process controlling balance (GO:0050885)	0.165692	07:41:42.175000	0.202102	0.404919	-1.79661	3.22964	PAFAH1B1
							negative regulation of viral entry into host cell (GO:0046597)	0.175711	07:52:24.248000	0.213289	0.409929	-1.85703	3.22921	IFITM3
							glucose metabolic process (GO:0006006)	0.0432846	04:43:54.575000	0.0700138	0.317209	-1.02818	3.22844	TPI1;MDH2;ALDOA
							mRNA export from nucleus (GO:0006406)	0.0389126	0.183646	0.0687623	0.317147	-0.994439	3.22838	ZC3H11A;SRSF3;SRSF6;SRSF7
							negative regulation of endoplasmic reticulum stress-induced intrinsic apoptotic signaling pathway (GO:1902236)	0.165692	07:41:42.175000	0.202102	0.404919	-1.79581	3.22819	PARK7
							negative regulation of oxidative stress-induced neuron death (GO:1903204)	0.124388	0.292707	0.155751	0.379113	-1.54455	3.21939	PARK7
							cell migration involved in sprouting angiogenesis (GO:0002042)	0.165692	07:41:42.175000	0.202102	0.404919	-1.78932	3.21652	TDGF1
							positive regulation of superoxide anion generation (GO:0032930)	0.134901	07:11:25.714000	0.167584	0.384699	-1.60429	3.21374	SOD1
							regulation of plasma membrane bounded cell projection organization (GO:0120035)	0.155551	07:29:18.621000	0.190757	0.398153	-1.72485	3.20957	VPS35
							cellular response to starvation (GO:0009267)	0.041222	04:34:07.051000	0.0724393	0.323088	-1.00535	3.20583	CDKN1A;HSPA5;ATG14;FNIP1
							cellular response to radiation (GO:0071478)	0.0940207	06:33:24.361000	0.130859	0.370124	-1.35541	3.20451	CDKN1A;EEF1D
							positive regulation of cell development (GO:0010720)	0.0658752	0.253791	0.0945088	0.369285	-1.17708	3.20164	SPEN;SNW1
							regulation of transcription of nuclear large rRNA transcript from RNA polymerase I promoter (GO:1901836)	0.145288	07:20:27.978000	0.179252	0.391452	-1.65948	3.20119	NCL
							regulation of intrinsic apoptotic signaling pathway in response to DNA damage by p53 class mediator (GO:1902165)	0.145288	07:20:27.978000	0.179252	0.391452	-1.65689	3.1962	MIF
							positive regulation of protein localization to nucleus (GO:1900182)	0.0940207	0.273199	0.130859	0.370124	-1.34995	3.19161	CCT3;PARK7
							ERBB2 signaling pathway (GO:0038128)	0.0831007	06:27:15.528000	0.116868	0.370124	-1.2777	3.17852	HSP90AA1;UBB
							positive regulation of mitochondrial fission (GO:0090141)	0.165692	0.320627	0.202102	0.404919	-1.75685	3.15817	VPS35
							positive regulation of mitotic nuclear division (GO:0045840)	0.0866953	06:29:45.077000	0.121489	0.370124	-1.29109	3.15718	RANBP1;UBE2C
							regulation of proteasomal protein catabolic process (GO:0061136)	0.0831007	06:27:15.528000	0.116868	0.370124	-1.26866	3.15605	GPX1;UBB
							positive regulation of cellular catabolic process (GO:0031331)	0.0400578	04:28:30.203000	0.0705885	0.318962	-0.97839	3.1479	HSP90AA1;PLK2;VPS35;CNOT8
							nucleic acid phosphodiester bond hydrolysis (GO:0090305)	0.0594671	05:41:47.870000	0.0934836	0.369285	-1.11483	3.14641	PARP1;UBB;GTF2H1
							regulation of protein dephosphorylation (GO:0035304)	0.0866953	0.270661	0.121489	0.370124	-1.28544	3.14335	CALM1;HSP90B1
							regulation of release of cytochrome c from mitochondria (GO:0090199)	0.0866953	06:29:45.077000	0.121489	0.370124	-1.2849	3.14203	GPX1;FAM162A
							regulation of centriole replication (GO:0046599)	0.175711	07:52:24.248000	0.213289	0.409929	-1.805	3.13873	PLK2
							purine-containing compound salvage (GO:0043101)	0.165692	07:41:42.175000	0.202102	0.404919	-1.7452	3.13721	APRT
							negative regulation of ryanodine-sensitive calcium-release channel activity (GO:0060315)	0.134901	07:11:25.714000	0.167584	0.384699	-1.56472	3.13447	CALM1
							negative regulation of intracellular signal transduction (GO:1902532)	0.0459792	04:55:15.117000	0.0857859	0.356189	-1.01017	3.11088	DDIT3;TMSB4X;WWC2;MDM2;FNIP1
							positive regulation of chromatin silencing (GO:0031937)	0.102978	0.27862	0.13158	0.370124	-1.3617	3.09547	MIER1
							SCF-dependent proteasomal ubiquitin-dependent protein catabolic process (GO:0031146)	0.0575462	05:35:12.893000	0.0907321	0.367909	-1.08394	3.09483	UBB;PSMB3;PSMA7
							mitotic cell cycle arrest (GO:0071850)	0.165692	07:41:42.175000	0.202102	0.404919	-1.71566	3.08412	CDC14A
							peptidyl-proline modification (GO:0018208)	0.0866953	06:29:45.077000	0.121489	0.370124	-1.25928	3.07938	PPIB;FKBP3
							positive regulation of posttranscriptional gene silencing (GO:0060148)	0.134901	07:11:25.714000	0.167584	0.384699	-1.53712	3.07919	FXR1
							Golgi to vacuole transport (GO:0006896)	0.165692	07:41:42.175000	0.202102	0.404919	-1.71108	3.07588	LAMP1
							regulation of fatty acid metabolic process (GO:0019217)	0.165692	07:41:42.175000	0.202102	0.404919	-1.70874	3.07167	FABP3
							ER-associated misfolded protein catabolic process (GO:0071712)	0.155551	07:29:18.621000	0.190757	0.398153	-1.64775	3.06611	VCP
							regulation of peptidyl-serine phosphorylation (GO:0033135)	0.0870536	06:29:45.077000	0.132163	0.370536	-1.25368	3.06051	MIF;PARK7;FNIP1
							peptidyl-arginine modification (GO:0018195)	0.145288	07:20:27.978000	0.179252	0.391452	-1.58555	3.05858	PARK7
							odontogenesis (GO:0042476)	0.0903359	0.270661	0.126153	0.370124	-1.27143	3.0568	ANKRD11;AQP3
							entry of bacterium into host cell (GO:0035635)	0.145288	07:20:27.978000	0.179252	0.391452	-1.58374	3.05509	UBB
							endosome transport via multivesicular body sorting pathway (GO:0032509)	0.145288	07:20:27.978000	0.179252	0.391452	-1.58308	3.05383	VCP
							lysosomal transport (GO:0007041)	0.0575462	05:35:12.893000	0.0907321	0.367909	-1.06847	3.05066	LAMP1;VPS35;ATG14
							positive regulation of I-kappaB kinase/NF-kappaB signaling (GO:0043123)	0.048016	05:02:46.090000	0.0891652	0.367698	-1.00207	3.04252	UBB;EEF1D;PLK2;MIER1;S100A13
							translesion synthesis (GO:0019985)	0.0940207	06:33:24.361000	0.130859	0.370124	-1.28369	3.03496	VCP;UBB
							negative regulation of epidermal growth factor receptor signaling pathway (GO:0042059)	0.0866953	06:29:45.077000	0.121489	0.370124	-1.23901	3.02982	UBB;SNX6
							response to metal ion (GO:0010038)	0.0575462	0.232788	0.0907321	0.367909	-1.0597	3.02562	CALM1;AQP3;CRIP1
							mitotic spindle midzone assembly (GO:0051256)	0.124388	07:01:29.904000	0.155751	0.379113	-1.45133	3.02508	CDC14A
							regulation of hydrolase activity (GO:0051336)	0.0737345	06:25:01.459000	0.113671	0.370124	-1.15761	3.01823	ATPIF1;PAFAH1B1;SOD1
							rRNA 3'-end processing (GO:0031125)	0.145288	07:20:27.978000	0.179252	0.391452	-1.56096	3.01114	RPS21
							positive regulation of reactive oxygen species metabolic process (GO:2000379)	0.0831007	06:27:15.528000	0.116868	0.370124	-1.20899	3.0076	CDKN1A;SOD1
							regulation of mammary gland epithelial cell proliferation (GO:0033599)	0.124388	07:01:29.904000	0.155751	0.379113	-1.44251	3.0067	GPX1
							cellular response to osmotic stress (GO:0071470)	0.165692	07:41:42.175000	0.202102	0.404919	-1.67063	3.00317	YBX3
							regulation of phagocytosis (GO:0050764)	0.0903359	06:29:45.077000	0.126153	0.370124	-1.24861	3.00194	CALR;LYAR
							regulation of chromatin silencing (GO:0031935)	0.134901	07:11:25.714000	0.167584	0.384699	-1.49716	2.99914	MIER1
							long-term memory (GO:0007616)	0.195391	08:06:18.249000	0.235196	0.419236	-1.83283	2.99255	SGK1
							positive regulation of protein homodimerization activity (GO:0090073)	0.102978	06:41:12.730000	0.13158	0.370124	-1.30913	2.97597	PARK7
							response to ethanol (GO:0045471)	0.165692	07:41:42.175000	0.202102	0.404919	-1.65461	2.97437	SOD1
							miRNA mediated inhibition of translation (GO:0035278)	0.134901	07:11:25.714000	0.167584	0.384699	-1.48279	2.97035	TNRC6C
							myelination in peripheral nervous system (GO:0022011)	0.155551	07:29:18.621000	0.190757	0.398153	-1.59492	2.96779	SOD1
							positive regulation of macrophage activation (GO:0043032)	0.195391	08:06:18.249000	0.235196	0.419236	-1.81721	2.96704	HSPD1
							RNA metabolic process (GO:0016070)	0.0820548	0.26893	0.143331	0.374015	-1.18599	2.96541	EIF4A2;RBM39;LIG1;PARP1;DHX36
							negative regulation of release of cytochrome c from mitochondria (GO:0090201)	0.175711	07:52:24.248000	0.213289	0.409929	-1.70418	2.96342	GPX1
							positive regulation of epithelial cell migration (GO:0010634)	0.0614179	05:50:15.745000	0.0962693	0.369285	-1.06144	2.96146	CALR;PFN1;TDGF1
							regulation of trophoblast cell migration (GO:1901163)	0.134901	07:11:25.714000	0.167584	0.384699	-1.47511	2.95496	CALR
							positive regulation of nuclear-transcribed mRNA poly(A) tail shortening (GO:0060213)	0.134901	07:11:25.714000	0.167584	0.384699	-1.47361	2.95196	TNRC6C
							peptidyl-serine modification (GO:0018209)	0.0555601	05:30:31.697000	0.101528	0.369285	-1.01842	2.94352	PARP1;PLK2;TLK2;SGK1;TDGF1
							negative regulation of cell aging (GO:0090344)	0.175711	07:52:24.248000	0.213289	0.409929	-1.69226	2.94269	MIF
							regulation of mitotic metaphase/anaphase transition (GO:0030071)	0.175711	07:52:24.248000	0.213289	0.409929	-1.6879	2.93511	UBE2C
							negative regulation of cysteine-type endopeptidase activity involved in apoptotic process (GO:0043154)	0.0501665	05:08:22.819000	0.0800786	0.344739	-0.978414	2.92781	GPX1;PARK7;FNIP1
							genitalia development (GO:0048806)	0.18561	07:59:31.312000	0.224319	0.4188	-1.7362	2.92395	TBX3
							positive regulation of protein depolymerization (GO:1901881)	0.145288	07:20:27.978000	0.179252	0.391452	-1.51524	2.92295	STMN2
							positive regulation of histone H3-K4 methylation (GO:0051571)	0.155551	07:29:18.621000	0.190757	0.398153	-1.56726	2.91632	SNW1
							negative regulation of ATPase activity (GO:0032780)	0.145288	07:20:27.978000	0.179252	0.391452	-1.50374	2.90076	ATPIF1
							negative regulation of peptidyl-threonine phosphorylation (GO:0010801)	0.175711	07:52:24.248000	0.213289	0.409929	-1.65617	2.87993	CALM1
							neuron projection development (GO:0031175)	0.0522477	05:18:46.263000	0.0961285	0.369285	-0.975374	2.87907	UBB;STMN2;SGK1;MANF;MAP4K4
							lipoxygenase pathway (GO:0019372)	0.175711	07:52:24.248000	0.213289	0.409929	-1.65233	2.87327	GPX1
							microtubule depolymerization (GO:0007019)	0.175711	07:52:24.248000	0.213289	0.409929	-1.6505	2.87007	STMN2
							regulation of gene expression (GO:0010468)	0.0753828	06:25:01.459000	0.225216	0.4188	-1.10672	2.86105	EIF4A2;GPX1;AHNAK;NME2;MIF;PARK7;ATG14;CRIP1;HINT1;SON;SP1;DDIT3;TRA2B;RLIM;VPS35;CALR;CNOT8;BPTF
							NIK/NF-kappaB signaling (GO:0038061)	0.0737345	0.267378	0.113671	0.370124	-1.09134	2.84544	UBB;PSMB3;PSMA7
							retrograde transport, endosome to Golgi (GO:0042147)	0.0780661	06:25:01.459000	0.11972	0.370124	-1.11546	2.84465	VPS26A;VPS35;SNX6
							regulation of T cell differentiation in thymus (GO:0033081)	0.145288	07:20:27.978000	0.179252	0.391452	-1.47463	2.84461	SOD1
							regulation of hematopoietic stem cell differentiation (GO:1902036)	0.065408	06:05:27.573000	0.101941	0.369285	-1.04192	2.84142	UBB;PSMB3;PSMA7
							regulation of oxidative phosphorylation (GO:0002082)	0.113747	06:52:37.988000	0.14375	0.374015	-1.30688	2.84086	VCP
							negative regulation of cell death (GO:0060548)	0.0758865	0.267378	0.11668	0.370124	-1.09994	2.83621	VPS35;PARK7;SRSF6
							positive regulation of viral process (GO:0048524)	0.101517	06:41:12.730000	0.14039	0.374015	-1.23913	2.83455	CFL1;PPIB
							myeloid cell development (GO:0061515)	0.175711	07:52:24.248000	0.213289	0.409929	-1.62981	2.83411	LYAR
							placenta development (GO:0001890)	0.155551	07:29:18.621000	0.190757	0.398153	-1.51887	2.82627	SOD1
							positive regulation of natural killer cell mediated cytotoxicity (GO:0045954)	0.195391	08:06:18.249000	0.235196	0.419236	-1.73021	2.82499	LAMP1
							positive regulation of blood vessel endothelial cell migration (GO:0043536)	0.105326	06:49:40.483000	0.145211	0.377237	-1.2541	2.8226	SP1;TMSB4X
							copper ion homeostasis (GO:0055070)	0.155551	07:29:18.621000	0.190757	0.398153	-1.51666	2.82217	ATOX1
							tumor necrosis factor-mediated signaling pathway (GO:0033209)	0.0624287	05:52:50.685000	0.105297	0.369285	-1.01634	2.81906	UBB;PSMB3;TMSB4X;PSMA7
							regulation of catabolic process (GO:0009894)	0.145288	07:20:27.978000	0.179252	0.391452	-1.45396	2.80474	MDM2
							negative regulation of reactive oxygen species metabolic process (GO:2000378)	0.195391	0.337711	0.235196	0.419236	-1.70526	2.78427	PARK7
							positive regulation of translation (GO:0045727)	0.0695143	06:16:15.787000	0.107743	0.370124	-1.04345	2.78206	FXR1;RPS9;YBX3
							negative regulation of myoblast differentiation (GO:0045662)	0.145288	07:20:27.978000	0.179252	0.391452	-1.43944	2.77673	TBX3
							regulation of exosomal secretion (GO:1903541)	0.18561	0.333001	0.224319	0.4188	-1.64837	2.77602	SDC4
							regulation of G1/S transition of mitotic cell cycle (GO:2000045)	0.109172	06:52:37.988000	0.150065	0.379113	-1.25277	2.77467	CDKN1A;JADE1
							positive regulation of signal transduction by p53 class mediator (GO:1901798)	0.195391	08:06:18.249000	0.235196	0.419236	-1.69881	2.77374	UBB
							thymus development (GO:0048538)	0.165692	07:41:42.175000	0.202102	0.404919	-1.53673	2.76247	SOD1
							positive regulation of mRNA metabolic process (GO:1903313)	0.145288	07:20:27.978000	0.179252	0.391452	-1.42695	2.75263	CNOT8
							renal absorption (GO:0070293)	0.155551	07:29:18.621000	0.190757	0.398153	-1.47128	2.73773	SGK1
							negative regulation of neuron death (GO:1901215)	0.0802729	06:25:01.459000	0.122788	0.370124	-1.08532	2.73753	VPS35;PARK7;SOD1
							regulation of transcription, DNA-templated (GO:0006355)	0.0699039	06:17:25.289000	0.263838	0.435447	-1.02861	2.73674	CDKN1A;PARK7;HSPD1;HINT1;UBN1;SPP1;BPTF;SNX6;SPEN;NME2;ARID5B;VEZF1;PA2G4;TBX3;KLF6;SNW1;CCNE1;SP1;DDIT3;SUB1;KLF9;MDM2;RLIM;CALR;CNOT8;TAF3
							negative regulation of adherens junction organization (GO:1903392)	0.175711	07:52:24.248000	0.213289	0.409929	-1.56831	2.72715	RCC2
							regulation of superoxide anion generation (GO:0032928)	0.155551	07:29:18.621000	0.190757	0.398153	-1.46246	2.72132	SOD1
							positive regulation of viral transcription (GO:0050434)	0.0903359	06:29:45.077000	0.126153	0.370124	-1.12951	2.71559	SNW1;SP1
							fluid transport (GO:0042044)	0.165692	07:41:42.175000	0.202102	0.404919	-1.50986	2.71417	AQP3
							regulation of telomerase activity (GO:0051972)	0.0940207	06:33:24.361000	0.130859	0.370124	-1.14753	2.71304	HSP90AA1;HSP90AB1
							DNA replication-independent nucleosome organization (GO:0034724)	0.155551	0.312021	0.190757	0.398153	-1.44909	2.69644	UBN1
							positive regulation of interleukin-8 production (GO:0032757)	0.101517	06:41:12.730000	0.14039	0.374015	-1.17449	2.68669	DDIT3;PARK7
							negative regulation of hydrogen peroxide-induced cell death (GO:1903206)	0.165692	07:41:42.175000	0.202102	0.404919	-1.4884	2.67559	PARK7
							virion assembly (GO:0019068)	0.195391	08:06:18.249000	0.235196	0.419236	-1.63334	2.66683	UBB
							negative regulation of stress fiber assembly (GO:0051497)	0.195391	08:06:18.249000	0.235196	0.419236	-1.62996	2.66131	PFN1
							regulation of cell communication by electrical coupling involved in cardiac conduction (GO:1901844)	0.113747	06:52:37.988000	0.14375	0.374015	-1.22385	2.66037	CALM1
							odontogenesis of dentin-containing tooth (GO:0042475)	0.18561	07:59:31.312000	0.224319	0.4188	-1.57772	2.65705	ANKRD11
							DNA replication-independent nucleosome assembly (GO:0006336)	0.0831007	06:27:15.528000	0.116868	0.370124	-1.06691	2.65414	UBN1;CENPM
							phosphatidylinositol acyl-chain remodeling (GO:0036149)	0.18561	07:59:31.312000	0.224319	0.4188	-1.57351	2.64996	PLA2G1B
							regulation of secretion (GO:0051046)	0.165692	07:41:42.175000	0.202102	0.404919	-1.47262	2.64722	SGK1
							regulation of DNA-templated transcription in response to stress (GO:0043620)	0.155551	07:29:18.621000	0.190757	0.398153	-1.41394	2.63103	DDIT3
							water transport (GO:0006833)	0.155551	07:29:18.621000	0.190757	0.398153	-1.4104	2.62443	AQP3
							RNA secondary structure unwinding (GO:0010501)	0.109172	0.286551	0.150065	0.379113	-1.18455	2.62357	EIF4A2;DHX36
							intrinsic apoptotic signaling pathway by p53 class mediator (GO:0072332)	0.0977483	06:41:12.730000	0.135606	0.374015	-1.12641	2.61932	HINT1;SNW1
							UV protection (GO:0009650)	0.124388	07:01:29.904000	0.155751	0.379113	-1.2562	2.61836	GPX1
							forelimb morphogenesis (GO:0035136)	0.124388	07:01:29.904000	0.155751	0.379113	-1.25373	2.61322	TBX3
							mitochondrial translational termination (GO:0070126)	0.0940678	06:33:24.361000	0.14178	0.374015	-1.1041	2.60981	MRPL52;MRPS25;MRPS12
							mitochondrial translational elongation (GO:0070125)	0.0893662	06:29:45.077000	0.135342	0.374015	-1.08054	2.60952	MRPL52;MRPS25;MRPS12
							RNA stabilization (GO:0043489)	0.195391	08:06:18.249000	0.235196	0.419236	-1.59662	2.60688	DHX36
							negative regulation of ubiquitin-protein transferase activity (GO:0051444)	0.155551	07:29:18.621000	0.190757	0.398153	-1.3944	2.59467	PARK7
							positive regulation of acute inflammatory response (GO:0002675)	0.175711	07:52:24.248000	0.213289	0.409929	-1.49105	2.5928	PARK7
							mitotic G1/S transition checkpoint (GO:0044819)	0.124388	07:01:29.904000	0.155751	0.379113	-1.24187	2.5885	CCND1
							endosome to lysosome transport (GO:0008333)	0.116974	07:00:51.618000	0.159869	0.384699	-1.20143	2.57803	VCP;ATG14
							positive regulation of protein secretion (GO:0050714)	0.0780661	06:25:01.459000	0.11972	0.370124	-1.00445	2.56156	PLA2G1B;MIF;TRH
							negative regulation of telomere maintenance (GO:0032205)	0.195391	08:06:18.249000	0.235196	0.419236	-1.56408	2.55375	PARP1
							positive regulation of cyclic nucleotide metabolic process (GO:0030801)	0.18561	07:59:31.312000	0.224319	0.4188	-1.514	2.54974	CALM1
							regulation of cellular metabolic process (GO:0031323)	0.0903359	06:29:45.077000	0.126153	0.370124	-1.05558	2.53785	CACYBP;VPS35
							regulation of cell cycle G2/M phase transition (GO:1902749)	0.0825066	06:27:15.528000	0.125885	0.370124	-1.01389	2.52954	HSP90AA1;DYNLL1;PAFAH1B1
							chaperone-mediated protein transport (GO:0072321)	0.124388	07:01:29.904000	0.155751	0.379113	-1.21358	2.52952	TIMM13
							embryo development ending in birth or egg hatching (GO:0009792)	0.195391	08:06:18.249000	0.235196	0.419236	-1.54604	2.52429	TDGF1
							ERAD pathway (GO:0036503)	0.0674468	06:11:38.999000	0.104826	0.369285	-0.936015	2.52389	VCP;HSPA5;HSP90B1
							response to ionizing radiation (GO:0010212)	0.0674468	06:11:38.999000	0.104826	0.369285	-0.932861	2.51538	CDKN1A;EEF1D;H2AFX
							activation of protein kinase activity (GO:0032147)	0.0635208	05:57:15.514000	0.121454	0.370124	-0.91226	2.51454	UBB;PLA2G1B;PARK7;TDGF1;MAP4K4;SOD1
							oxidative phosphorylation (GO:0006119)	0.134901	07:11:25.714000	0.167584	0.384699	-1.25453	2.5131	CHCHD10
							postreplication repair (GO:0006301)	0.113056	06:52:37.988000	0.154952	0.379113	-1.15195	2.5111	VCP;UBB
							DNA-templated transcription, initiation (GO:0006352)	0.0752261	06:25:01.459000	0.13277	0.371625	-0.968711	2.5063	CDKN1A;SNW1;CCND1;GTF2H1;TAF3
							regulation of dendrite morphogenesis (GO:0048814)	0.101517	06:41:12.730000	0.14039	0.374015	-1.09549	2.50597	FXR1;CFL1
							leukotriene biosynthetic process (GO:0019370)	0.205055	08:13:36.463000	0.24592	0.42224	-1.57994	2.50338	PLA2G1B
							activation of MAPK activity (GO:0000187)	0.0539102	05:26:28.316000	0.0922782	0.369285	-0.856588	2.50161	UBB;PLA2G1B;TDGF1;SOD1
							insulin secretion (GO:0030073)	0.205055	08:13:36.463000	0.24592	0.42224	-1.57462	2.49494	PARK7
							nuclear envelope reassembly (GO:0031468)	0.205055	08:13:36.463000	0.24592	0.42224	-1.57151	2.49001	BANF1
							regulation of protein serine/threonine kinase activity (GO:0071900)	0.0737345	06:25:01.459000	0.113671	0.370124	-0.954453	2.48853	CDKN1A;GTF2H1;CALM1
							vesicle cytoskeletal trafficking (GO:0099518)	0.224038	08:34:11.178000	0.266923	0.435447	-1.65601	2.47729	PAFAH1B1
							3'-UTR-mediated mRNA stabilization (GO:0070935)	0.195391	08:06:18.249000	0.235196	0.419236	-1.51523	2.47399	YBX3
							ribonucleoside monophosphate biosynthetic process (GO:0009156)	0.165692	07:41:42.175000	0.202102	0.404919	-1.37417	2.47025	PAICS
							keratan sulfate catabolic process (GO:0042340)	0.145288	07:20:27.978000	0.179252	0.391452	-1.27936	2.46792	HEXA
							positive regulation of transcription from RNA polymerase II promoter (GO:0045944)	0.0877135	06:29:45.077000	0.230395	0.419236	-1.01271	2.46462	PARP1;PLA2G1B;NME2;GTF2H1;VEZF1;PARK7;CHCHD2;KLF6;SNW1;UBB;SP1;DDIT3;SUB1;DHX36;SQSTM1
							epithelial cell-cell adhesion (GO:0090136)	0.134901	07:11:25.714000	0.167584	0.384699	-1.22947	2.46289	PLEKHA7
							intrinsic apoptotic signaling pathway in response to DNA damage (GO:0008630)	0.116974	07:00:51.618000	0.159869	0.384699	-1.14507	2.4571	SNW1;CRIP1
							establishment of mitotic spindle orientation (GO:0000132)	0.165692	07:41:42.175000	0.202102	0.404919	-1.36406	2.45208	PAFAH1B1
							regulation of ATPase activity (GO:0043462)	0.0866953	0.270661	0.121489	0.370124	-0.99966	2.44452	ATPIF1;PFN1
							steroid catabolic process (GO:0006706)	0.155551	07:29:18.621000	0.190757	0.398153	-1.31342	2.44399	SPP1
							regulation of mitochondrial outer membrane permeabilization involved in apoptotic signaling pathway (GO:1901028)	0.195391	08:06:18.249000	0.235196	0.419236	-1.48297	2.42131	SLC25A5
							positive regulation of calcium ion transmembrane transporter activity (GO:1901021)	0.195391	0.337711	0.235196	0.419236	-1.48182	2.41944	CALM1
							response to thyroid hormone (GO:0097066)	0.134901	07:11:25.714000	0.167584	0.384699	-1.20307	2.41002	KLF9
							regulation of protein catabolic process (GO:0042176)	0.0988692	06:41:12.730000	0.148317	0.379113	-1.04075	2.40826	VCP;PLK2;MDM2
							negative regulation of microtubule depolymerization (GO:0007026)	0.205055	0.342783	0.24592	0.42224	-1.51984	2.40815	STMN2
							regulation of cell aging (GO:0090342)	0.155551	07:29:18.621000	0.190757	0.398153	-1.28686	2.39456	MIF
							ion transport (GO:0006811)	0.0612106	05:49:53.750000	0.124331	0.370124	-0.856957	2.39385	ATP6V0B;UBB;WNK1;ATP6V0D1;SGK1;ATP6V1D;ATP6V1C1
							coenzyme metabolic process (GO:0006732)	0.128929	07:11:25.714000	0.174785	0.391452	-1.16678	2.39014	DBT;DBI
							regulation of cellular amine metabolic process (GO:0033238)	0.128929	07:11:25.714000	0.174785	0.391452	-1.16266	2.38169	PSMB3;PSMA7
							negative regulation of interleukin-8 production (GO:0032717)	0.195391	08:06:18.249000	0.235196	0.419236	-1.45865	2.38161	TMSB4X
							positive regulation of cyclic nucleotide biosynthetic process (GO:0030804)	0.205055	08:13:36.463000	0.24592	0.42224	-1.50213	2.38009	CALM1
							regulation of cellular amino acid metabolic process (GO:0006521)	0.128929	07:11:25.714000	0.174785	0.391452	-1.15869	2.37357	PSMB3;PSMA7
							regulation of fatty acid oxidation (GO:0046320)	0.155551	0.312021	0.190757	0.398153	-1.273	2.36877	FABP3
							mitotic chromosome condensation (GO:0007076)	0.175711	07:52:24.248000	0.213289	0.409929	-1.36212	2.36862	SMC4
							negative regulation of multicellular organismal process (GO:0051241)	0.0654169	06:05:27.573000	0.109814	0.370124	-0.868173	2.36749	DDIT3;WWC2;CALR;SRSF6
							regulation of transcription initiation from RNA polymerase II promoter (GO:0060260)	0.155551	07:29:18.621000	0.190757	0.398153	-1.27229	2.36746	SUB1
							negative regulation of release of sequestered calcium ion into cytosol (GO:0051280)	0.134901	07:11:25.714000	0.167584	0.384699	-1.18119	2.36619	CALM1
							establishment of mitotic spindle localization (GO:0040001)	0.205055	08:13:36.463000	0.24592	0.42224	-1.48356	2.35067	PAFAH1B1
							anion homeostasis (GO:0055081)	0.205055	08:13:36.463000	0.24592	0.42224	-1.48319	2.35008	FABP3
							icosanoid secretion (GO:0032309)	0.134901	07:11:25.714000	0.167584	0.384699	-1.17159	2.34695	PLA2G1B
							cytoplasmic sequestering of transcription factor (GO:0042994)	0.18561	07:59:31.312000	0.224319	0.4188	-1.39333	2.34652	TMSB4X
							positive regulation of cardiac muscle hypertrophy (GO:0010613)	0.18561	07:59:31.312000	0.224319	0.4188	-1.39051	2.34177	PARP1
							hyaluronan catabolic process (GO:0030214)	0.18561	07:59:31.312000	0.224319	0.4188	-1.3893	2.33973	HEXA
							positive regulation of supramolecular fiber organization (GO:1902905)	0.0825066	06:27:15.528000	0.125885	0.370124	-0.930555	2.32162	GPX1;STMN2;PFN1
							regulation of mRNA catabolic process (GO:0061013)	0.165692	0.320627	0.202102	0.404919	-1.28749	2.31442	CNOT8
							detection of calcium ion (GO:0005513)	0.155551	07:29:18.621000	0.190757	0.398153	-1.24048	2.30826	CALM1
							negative regulation of intracellular transport (GO:0032387)	0.195391	08:06:18.249000	0.235196	0.419236	-1.40978	2.30182	SLC25A5
							regulation of blood vessel endothelial cell migration (GO:0043535)	0.124912	07:01:31.488000	0.169787	0.387206	-1.09997	2.2881	SP1;TMSB4X
							negative regulation of translation, ncRNA-mediated (GO:0040033)	0.134901	07:11:25.714000	0.167584	0.384699	-1.14098	2.28564	TNRC6C
							purine-containing compound catabolic process (GO:0072523)	0.165692	07:41:42.175000	0.202102	0.404919	-1.26673	2.27711	GPX1
							regulation of nuclear-transcribed mRNA catabolic process, deadenylation-dependent decay (GO:1900151)	0.165692	07:41:42.175000	0.202102	0.404919	-1.26166	2.26799	TNRC6C
							transport along microtubule (GO:0010970)	0.175711	07:52:24.248000	0.213289	0.409929	-1.30366	2.26696	DYNLL1
							negative regulation of viral genome replication (GO:0045071)	0.124912	0.292726	0.169787	0.387206	-1.08285	2.25249	IFITM3;BANF1
							positive regulation of epidermal cell differentiation (GO:0045606)	0.195391	08:06:18.249000	0.235196	0.419236	-1.37007	2.23698	NME2
							negative regulation of NF-kappaB import into nucleus (GO:0042347)	0.18561	07:59:31.312000	0.224319	0.4188	-1.32461	2.23078	TMSB4X
							vesicle transport along microtubule (GO:0047496)	0.214604	08:21:28.326000	0.256495	0.427522	-1.44859	2.22933	PAFAH1B1
							leukotriene metabolic process (GO:0006691)	0.214604	08:21:28.326000	0.256495	0.427522	-1.44287	2.22052	PLA2G1B
							response to ATP (GO:0033198)	0.165692	07:41:42.175000	0.202102	0.404919	-1.23471	2.21955	HSP90B1
							heart contraction (GO:0060047)	0.101517	06:41:12.730000	0.14039	0.374015	-0.969473	2.2177	GPX1;SOD1
							regulation of vascular endothelial cell proliferation (GO:1905562)	0.145288	07:20:27.978000	0.179252	0.391452	-1.14806	2.21464	SP1
							positive regulation of cellular protein metabolic process (GO:0032270)	0.0988692	06:41:12.730000	0.148317	0.379113	-0.955416	2.21079	FXR1;HSP90AA1;VPS35
							regulation of protein sumoylation (GO:0033233)	0.195391	08:06:18.249000	0.235196	0.419236	-1.35051	2.20505	PARK7
							positive regulation of transcription, DNA-templated (GO:0045893)	0.0819901	06:27:15.528000	0.246534	0.42224	-0.880597	2.20251	PARP1;PLA2G1B;NME2;GTF2H1;VEZF1;PARK7;CHCHD2;KLF6;SNW1;UBB;CCNE1;SP1;DDIT3;DHX36;SPP1;SQSTM1;TAF3;BPTF;HMGN1
							mRNA transcription (GO:0009299)	0.233359	08:43:38.014000	0.277205	0.440267	-1.47576	2.14748	DDIT3
							regulation of reactive oxygen species biosynthetic process (GO:1903426)	0.18561	07:59:31.312000	0.224319	0.4188	-1.26678	2.13338	PARK7
							regulation of response to interferon-gamma (GO:0060330)	0.165692	07:41:42.175000	0.202102	0.404919	-1.18525	2.13064	HSP90AB1
							regulation of oxidative stress-induced intrinsic apoptotic signaling pathway (GO:1902175)	0.205055	08:13:36.463000	0.24592	0.42224	-1.34412	2.12973	SOD1
							toll-like receptor signaling pathway (GO:0002224)	0.0870536	06:29:45.077000	0.132163	0.370536	-0.870458	2.12499	UBB;HSP90B1;HSPD1
							regulation of neuron apoptotic process (GO:0043523)	0.0940678	06:33:24.361000	0.14178	0.374015	-0.896735	2.11965	DDIT3;PARK7;SOD1
							blood circulation (GO:0008015)	0.124912	07:01:31.488000	0.169787	0.387206	-1.01681	2.1151	GPX1;SOD1
							antimicrobial humoral immune response mediated by antimicrobial peptide (GO:0061844)	0.120927	07:01:29.904000	0.164815	0.384699	-1.00094	2.11456	PLA2G1B;RPL39
							neuromuscular process (GO:0050905)	0.18561	07:59:31.312000	0.224319	0.4188	-1.25028	2.1056	PAFAH1B1
							translational termination (GO:0006415)	0.111291	06:52:37.988000	0.165072	0.384699	-0.956108	2.09924	MRPL52;MRPS25;MRPS12
							regulation of mitochondrial fission (GO:0090140)	0.214604	08:21:28.326000	0.256495	0.427522	-1.35914	2.09167	VPS35
							positive regulation of multicellular organismal process (GO:0051240)	0.0981914	06:41:12.730000	0.167782	0.384699	-0.899028	2.0865	NME2;PFN1;PPIB;SRSF6;SOD1
							histone H4-K8 acetylation (GO:0043982)	0.175711	07:52:24.248000	0.213289	0.409929	-1.19787	2.08299	JADE1
							prostaglandin biosynthetic process (GO:0001516)	0.205055	08:13:36.463000	0.24592	0.42224	-1.31447	2.08274	MIF
							negative regulation of viral process (GO:0048525)	0.233359	08:43:38.014000	0.277205	0.440267	-1.42637	2.07562	IFITM3
							negative regulation of protein depolymerization (GO:1901880)	0.224038	08:34:11.178000	0.266923	0.435447	-1.38432	2.07086	STMN2
							positive regulation of transcription initiation from RNA polymerase II promoter (GO:0060261)	0.195391	08:06:18.249000	0.235196	0.419236	-1.25503	2.04915	SUB1
							positive regulation of G-protein coupled receptor protein signaling pathway (GO:0045745)	0.195391	0.337711	0.235196	0.419236	-1.25224	2.0446	VPS35
							positive regulation of nuclear-transcribed mRNA catabolic process, deadenylation-dependent decay (GO:1900153)	0.18561	07:59:31.312000	0.224319	0.4188	-1.21284	2.04254	TNRC6C
							phosphatidylethanolamine biosynthetic process (GO:0006646)	0.175711	07:52:24.248000	0.213289	0.409929	-1.17163	2.03737	ETNK1
							B cell differentiation (GO:0030183)	0.132975	07:11:25.714000	0.179806	0.391653	-1.00596	2.02962	KLF6;FNIP1
							mitochondrial respiratory chain complex assembly (GO:0033108)	0.113844	06:52:37.988000	0.168489	0.385799	-0.925922	2.01196	NDUFA11;NDUFA3;UQCR10
							maintenance of protein location in nucleus (GO:0051457)	0.175711	07:52:24.248000	0.213289	0.409929	-1.15321	2.00533	TAF3
							aminoglycan biosynthetic process (GO:0006023)	0.109172	06:52:37.988000	0.150065	0.379113	-0.904739	2.00384	SDC4;HEXA
							phosphatidylglycerol metabolic process (GO:0046471)	0.242569	08:49:52.508000	0.287343	0.444593	-1.41121	1.99894	PLA2G1B
							positive regulation of oxidoreductase activity (GO:0051353)	0.214604	08:21:28.326000	0.256495	0.427522	-1.28783	1.98193	PARK7
							negative regulation of cell junction assembly (GO:1901889)	0.214604	08:21:28.326000	0.256495	0.427522	-1.28618	1.97939	RCC2
							regulation of long-term synaptic potentiation (GO:1900271)	0.214604	08:21:28.326000	0.256495	0.427522	-1.27725	1.96564	SQSTM1
							cellular response to unfolded protein (GO:0034620)	0.242569	08:49:52.508000	0.287343	0.444593	-1.3858	1.96295	HSPA5
							peptidyl-serine phosphorylation (GO:0018105)	0.0992292	0.27862	0.159388	0.384699	-0.846553	1.95581	PLK2;TLK2;SGK1;TDGF1
							folic acid-containing compound metabolic process (GO:0006760)	0.251669	08:58:41.415000	0.29734	0.451861	-1.413	1.94943	ATPIF1
							regulation of histone H3-K4 methylation (GO:0051569)	0.18561	07:59:31.312000	0.224319	0.4188	-1.15506	1.94524	SNW1
							negative regulation of protein tyrosine kinase activity (GO:0061099)	0.233359	08:43:38.014000	0.277205	0.440267	-1.33368	1.94073	SNX6
							androgen metabolic process (GO:0008209)	0.224038	08:34:11.178000	0.266923	0.435447	-1.29523	1.93759	SPP1
							positive regulation of interleukin-10 production (GO:0032733)	0.242569	08:49:52.508000	0.287343	0.444593	-1.36734	1.9368	HSPD1
							positive regulation of gene silencing by miRNA (GO:2000637)	0.224038	08:34:11.178000	0.266923	0.435447	-1.29274	1.93385	FXR1
							positive regulation of phosphorylation (GO:0042327)	0.107621	06:52:37.988000	0.18177	0.39492	-0.865694	1.92976	VCP;CCND1;MIF;ATG14;FNIP1
							positive regulation of response to endoplasmic reticulum stress (GO:1905898)	0.18561	07:59:31.312000	0.224319	0.4188	-1.14502	1.92834	DDIT3
							protein import (GO:0017038)	0.149434	07:29:08.324000	0.200091	0.404919	-1.01221	1.92411	PDIA3;RANBP1
							small GTPase mediated signal transduction (GO:0007264)	0.119017	07:01:29.904000	0.175384	0.391452	-0.902263	1.92045	CDKN1A;PLK2;PARK7
							histone H4-K5 acetylation (GO:0043981)	0.175711	07:52:24.248000	0.213289	0.409929	-1.10116	1.91482	JADE1
							regulation of microtubule depolymerization (GO:0031114)	0.242569	08:49:52.508000	0.287343	0.444593	-1.3497	1.91181	STMN2
							regulation of glucose transport (GO:0010827)	0.18561	07:59:31.312000	0.224319	0.4188	-1.13517	1.91174	PLA2G1B
							regulation of protein kinase activity (GO:0045859)	0.102986	06:41:12.730000	0.164743	0.384699	-0.840569	1.91075	CDKN1A;RPLP1;PARK7;SOD1
							positive regulation of chromosome organization (GO:2001252)	0.214604	08:21:28.326000	0.256495	0.427522	-1.24009	1.90844	DHX36
							response to interferon-alpha (GO:0035455)	0.195391	08:06:18.249000	0.235196	0.419236	-1.15723	1.88946	IFITM3
							cellular response to interleukin-6 (GO:0071354)	0.251669	08:58:41.415000	0.29734	0.451861	-1.36841	1.88792	TDGF1
							phosphatidylethanolamine metabolic process (GO:0046337)	0.224038	0.357074	0.266923	0.435447	-1.26104	1.88644	ETNK1
							purine ribonucleotide catabolic process (GO:0009154)	0.214604	08:21:28.326000	0.256495	0.427522	-1.22186	1.8804	HINT1
							glucan catabolic process (GO:0009251)	0.205055	08:13:36.463000	0.24592	0.42224	-1.18359	1.87536	CALM1
							negative regulation of steroid biosynthetic process (GO:0010894)	0.18561	07:59:31.312000	0.224319	0.4188	-1.11197	1.87267	SOD1
							maturation of 5.8S rRNA from tricistronic rRNA transcript (SSU-rRNA, 5.8S rRNA, LSU-rRNA) (GO:0000466)	0.214604	08:21:28.326000	0.256495	0.427522	-1.21619	1.87167	RPS21
							negative regulation of cellular response to transforming growth factor beta stimulus (GO:1903845)	0.13705	07:16:35.388000	0.184848	0.398153	-0.940337	1.86884	UBB;SNX6
							ciliary basal body-plasma membrane docking (GO:0097711)	0.111291	06:52:37.988000	0.165072	0.384699	-0.850994	1.86845	HSP90AA1;DYNLL1;PAFAH1B1
							regulation of telomere maintenance via telomere lengthening (GO:1904356)	0.195391	0.337711	0.235196	0.419236	-1.14072	1.8625	PARP1
							regulation of interferon-alpha production (GO:0032647)	0.18561	07:59:31.312000	0.224319	0.4188	-1.10562	1.86198	HSPD1
							positive regulation of protein export from nucleus (GO:0046827)	0.175711	07:52:24.248000	0.213289	0.409929	-1.06611	1.85387	ANP32B
							positive regulation of leukocyte activation (GO:0002696)	0.18561	0.333001	0.224319	0.4188	-1.09882	1.85053	HSPD1
							regulation of protein metabolic process (GO:0051246)	0.162031	07:41:42.175000	0.215476	0.412268	-1.01457	1.84648	MDM2;VPS35
							positive regulation of exosomal secretion (GO:1903543)	0.175711	07:52:24.248000	0.213289	0.409929	-1.0557	1.83577	SDC4
							neuron development (GO:0048666)	0.0973754	06:41:12.730000	0.156735	0.380962	-0.783628	1.82521	FXR1;WNK1;STMN2;MANF
							regulation of cellular component organization (GO:0051128)	0.0901264	0.270661	0.146293	0.379113	-0.756553	1.82068	HSP90AA1;CFL1;PARK7;SGK1
							positive regulation of nervous system development (GO:0051962)	0.132975	07:11:25.714000	0.179806	0.391653	-0.901665	1.81919	SPEN;SNW1
							regulation of insulin-like growth factor receptor signaling pathway (GO:0043567)	0.195391	08:06:18.249000	0.235196	0.419236	-1.11091	1.81384	IGFBP2
							intrinsic apoptotic signaling pathway in response to DNA damage by p53 class mediator (GO:0042771)	0.224038	08:34:11.178000	0.266923	0.435447	-1.21106	1.81167	SNW1
							purine nucleotide metabolic process (GO:0006163)	0.224038	08:34:11.178000	0.266923	0.435447	-1.20638	1.80467	GPX1
							embryonic digit morphogenesis (GO:0042733)	0.18561	07:59:31.312000	0.224319	0.4188	-1.06966	1.80141	TBX3
							response to retinoic acid (GO:0032526)	0.153611	07:29:18.621000	0.205206	0.40682	-0.961127	1.80051	SNW1;AQP3
							regulation of epidermal cell differentiation (GO:0045604)	0.224038	08:34:11.178000	0.266923	0.435447	-1.20156	1.79746	AQP3
							cellular response to misfolded protein (GO:0071218)	0.233359	08:43:38.014000	0.277205	0.440267	-1.23403	1.79573	VCP
							response to UV (GO:0009411)	0.11642	07:00:43.289000	0.171926	0.391452	-0.833447	1.79237	GPX1;CCND1;PARP1
							peptide hormone secretion (GO:0030072)	0.269543	09:15:05.689000	0.316917	0.462182	-1.36364	1.78777	PARK7
							cellular response to hexose stimulus (GO:0071331)	0.233359	08:43:38.014000	0.277205	0.440267	-1.22787	1.78676	TRA2B
							limb morphogenesis (GO:0035108)	0.233359	08:43:38.014000	0.277205	0.440267	-1.21808	1.77252	TBX3
							protein ADP-ribosylation (GO:0006471)	0.214604	08:21:28.326000	0.256495	0.427522	-1.15162	1.7723	PARP1
							I-kappaB kinase/NF-kappaB signaling (GO:0007249)	0.153611	07:29:18.621000	0.205206	0.40682	-0.944121	1.76865	IRAK1BP1;UBB
							branched-chain amino acid catabolic process (GO:0009083)	0.233359	08:43:38.014000	0.277205	0.440267	-1.2136	1.766	DBT
							regulation of cardiac muscle hypertrophy (GO:0010611)	0.233359	08:43:38.014000	0.277205	0.440267	-1.21243	1.7643	PARP1
							hyaluronan metabolic process (GO:0030212)	0.233359	0.363634	0.277205	0.440267	-1.21229	1.76409	HEXA
							regulation of cardiac muscle contraction by calcium ion signaling (GO:0010882)	0.233359	0.363634	0.277205	0.440267	-1.20853	1.75862	CALM1
							glycosaminoglycan catabolic process (GO:0006027)	0.149434	07:29:08.324000	0.200091	0.404919	-0.925076	1.75848	SDC4;HEXA
							Notch signaling pathway (GO:0007219)	0.145281	07:20:27.978000	0.194993	0.404919	-0.909741	1.75497	SNW1;UBB
							positive regulation of natural killer cell mediated immunity (GO:0002717)	0.195391	08:06:18.249000	0.235196	0.419236	-1.07089	1.74849	LAMP1
							negative regulation of actin filament bundle assembly (GO:0032232)	0.224038	08:34:11.178000	0.266923	0.435447	-1.16809	1.74739	PFN1
							negative regulation of calcium-mediated signaling (GO:0050849)	0.205055	08:13:36.463000	0.24592	0.42224	-1.1025	1.74688	CALM1
							regulation of DNA-templated transcription, elongation (GO:0032784)	0.224038	08:34:11.178000	0.266923	0.435447	-1.16684	1.74552	HMGN1
							chromosome organization (GO:0051276)	0.149434	07:29:08.324000	0.200091	0.404919	-0.91668	1.74252	PARP1;UBB
							negative regulation of intracellular protein transport (GO:0090317)	0.224038	08:34:11.178000	0.266923	0.435447	-1.16421	1.74158	PARK7
							integrin-mediated signaling pathway (GO:0007229)	0.15781	07:34:45.698000	0.210334	0.409929	-0.939752	1.73512	RCC2;NME2
							negative regulation of cyclin-dependent protein kinase activity (GO:1904030)	0.233359	08:43:38.014000	0.277205	0.440267	-1.18967	1.73118	CDKN1A
							positive regulation of DNA-templated transcription, initiation (GO:2000144)	0.18561	07:59:31.312000	0.224319	0.4188	-1.02492	1.72608	SUB1
							glucan biosynthetic process (GO:0009250)	0.205055	08:13:36.463000	0.24592	0.42224	-1.08844	1.72461	UBB
							viral life cycle (GO:0019058)	0.140537	07:20:27.978000	0.203696	0.40572	-0.876724	1.72038	VCP;HSP90AB1;UBB
							nucleobase-containing compound biosynthetic process (GO:0034654)	0.195391	08:06:18.249000	0.235196	0.419236	-1.05356	1.7202	APRT
							mesoderm development (GO:0007498)	0.233359	08:43:38.014000	0.277205	0.440267	-1.18053	1.71787	TBX3
							regulation of dendritic spine morphogenesis (GO:0061001)	0.251669	08:58:41.415000	0.29734	0.451861	-1.24463	1.71714	CFL1
							positive regulation of transcription of Notch receptor target (GO:0007221)	0.195391	08:06:18.249000	0.235196	0.419236	-1.04987	1.71418	SNW1
							cellular response to glucocorticoid stimulus (GO:0071385)	0.195391	08:06:18.249000	0.235196	0.419236	-1.04981	1.71408	KLF9
							positive regulation of muscle hypertrophy (GO:0014742)	0.165692	07:41:42.175000	0.202102	0.404919	-0.949416	1.70669	PARP1
							regulation of interleukin-8 secretion (GO:2000482)	0.251669	08:58:41.415000	0.29734	0.451861	-1.23485	1.70365	TMSB4X
							protein oligomerization (GO:0051259)	0.12256	07:01:29.904000	0.203526	0.40572	-0.807917	1.69594	AHNAK;MAT2A;DDIT3;TRA2B;ATPIF1
							cellular response to nutrient levels (GO:0031669)	0.141152	07:20:27.978000	0.189911	0.398153	-0.864804	1.69321	ATG14;FNIP1
							cellular polysaccharide catabolic process (GO:0044247)	0.214604	08:21:28.326000	0.256495	0.427522	-1.09746	1.68895	CALM1
							phosphatidylglycerol acyl-chain remodeling (GO:0036148)	0.205055	08:13:36.463000	0.24592	0.42224	-1.06579	1.68872	PLA2G1B
							mitochondrial translation (GO:0032543)	0.140537	07:20:27.978000	0.203696	0.40572	-0.856753	1.68119	MRPL52;MRPS25;MRPS12
							regulation of early endosome to late endosome transport (GO:2000641)	0.195391	08:06:18.249000	0.235196	0.419236	-1.02806	1.67856	DNAJC13
							positive regulation of neuron apoptotic process (GO:0043525)	0.214604	08:21:28.326000	0.256495	0.427522	-1.08857	1.67527	DDIT3
							focal adhesion assembly (GO:0048041)	0.205055	08:13:36.463000	0.24592	0.42224	-1.05716	1.67504	RCC2
							histone lysine methylation (GO:0034968)	0.242569	08:49:52.508000	0.287343	0.444593	-1.18017	1.67168	DPY30
							regulation of protein kinase A signaling (GO:0010738)	0.214604	08:21:28.326000	0.256495	0.427522	-1.08474	1.66937	MIF
							positive regulation of epithelial cell proliferation (GO:0050679)	0.140537	0.305879	0.203696	0.40572	-0.850472	1.66887	NME2;SRSF6;NME1
							regulation of cellular ketone metabolic process (GO:0010565)	0.170533	07:50:54.144000	0.225792	0.4188	-0.943421	1.66875	PSMB3;PSMA7
							spermatogenesis (GO:0007283)	0.114639	06:54:53.953000	0.181187	0.394158	-0.769599	1.66692	RPL39L;PTTG1;FAM50A;SOD1
							endoplasmic reticulum mannose trimming (GO:1904380)	0.214604	08:21:28.326000	0.256495	0.427522	-1.07366	1.65232	UBB
							branched-chain amino acid metabolic process (GO:0009081)	0.242569	08:49:52.508000	0.287343	0.444593	-1.1663	1.65202	DBT
							negative regulation of cellular process (GO:0048523)	0.111638	06:52:37.988000	0.23469	0.419236	-0.749816	1.64397	CDKN1A;FABP3;JADE1;VPS35;ANP32B;MIF;PARK7;CNOT8;SRSF6;NME1
							homologous chromosome segregation (GO:0045143)	0.205055	08:13:36.463000	0.24592	0.42224	-1.03708	1.64322	PTTG1
							negative regulation of response to endoplasmic reticulum stress (GO:1903573)	0.242569	08:49:52.508000	0.287343	0.444593	-1.15692	1.63874	PARK7
							cellular response to interleukin-1 (GO:0071347)	0.108742	0.286551	0.172897	0.391452	-0.73615	1.63335	UBB;PSMB3;SQSTM1;PSMA7
							triglyceride catabolic process (GO:0019433)	0.242569	08:49:52.508000	0.287343	0.444593	-1.1501	1.62907	FABP3
							positive regulation of transcription from RNA polymerase I promoter (GO:0045943)	0.233359	08:43:38.014000	0.277205	0.440267	-1.11942	1.62895	NCL
							positive regulation of sequence-specific DNA binding transcription factor activity (GO:0051091)	0.11916	07:01:29.904000	0.198616	0.404919	-0.765187	1.62777	UBB;PLA2G1B;DDIT3;ARID5B;PARK7
							positive regulation of protein autophosphorylation (GO:0031954)	0.242569	0.367969	0.287343	0.444593	-1.14365	1.61994	CALM1
							long-term synaptic potentiation (GO:0060291)	0.233359	08:43:38.014000	0.277205	0.440267	-1.11005	1.61532	PLK2
							regulation of ruffle assembly (GO:1900027)	0.233359	08:43:38.014000	0.277205	0.440267	-1.10361	1.60594	PFN1
							regulation of neurogenesis (GO:0050767)	0.153611	07:29:18.621000	0.205206	0.40682	-0.856053	1.60367	SPEN;SNW1
							establishment of spindle orientation (GO:0051294)	0.233359	08:43:38.014000	0.277205	0.440267	-1.10142	1.60277	PAFAH1B1
							cell-substrate adherens junction assembly (GO:0007045)	0.205055	08:13:36.463000	0.24592	0.42224	-1.00992	1.60019	RCC2
							positive regulation of type I interferon production (GO:0032481)	0.174812	0.328058	0.230964	0.419236	-0.91751	1.60018	DHX36;HSPD1
							negative regulation of oxidative stress-induced cell death (GO:1903202)	0.26066	09:07:23.917000	0.307197	0.457832	-1.18956	1.59941	PARK7
							cellular protein complex localization (GO:0034629)	0.233359	0.363634	0.277205	0.440267	-1.09672	1.59592	RCC2
							regulation of cellular response to stress (GO:0080135)	0.132318	07:11:25.714000	0.192951	0.402237	-0.785661	1.58904	CHCHD2;HSP90AA1;HSP90AB1
							negative regulation of viral life cycle (GO:1903901)	0.170533	07:50:54.144000	0.225792	0.4188	-0.894593	1.58238	IFITM3;BANF1
							error-prone translesion synthesis (GO:0042276)	0.224038	0.357074	0.266923	0.435447	-1.056	1.57971	UBB
							regulation of transcription involved in G1/S transition of mitotic cell cycle (GO:0000083)	0.27832	09:26:57.944000	0.326501	0.468123	-1.2308	1.57417	CCNE1
							long-chain fatty acid transport (GO:0015909)	0.269543	09:15:05.689000	0.316917	0.462182	-1.18831	1.55791	FABP3
							intrinsic apoptotic signaling pathway in response to endoplasmic reticulum stress (GO:0070059)	0.26066	0.380138	0.307197	0.457832	-1.15613	1.55447	DDIT3
							negative regulation of transforming growth factor beta receptor signaling pathway (GO:0030512)	0.145281	07:20:27.978000	0.194993	0.404919	-0.805129	1.55317	UBB;SNX6
							cellular response to epidermal growth factor stimulus (GO:0071364)	0.269543	09:15:05.689000	0.316917	0.462182	-1.18103	1.54837	TDGF1
							regulation of interleukin-10 production (GO:0032653)	0.269543	0.385483	0.316917	0.462182	-1.17993	1.54692	HSPD1
							positive regulation of epithelial cell differentiation (GO:0030858)	0.214604	08:21:28.326000	0.256495	0.427522	-1.00482	1.54638	VEZF1
							activin receptor signaling pathway (GO:0032924)	0.214604	08:21:28.326000	0.256495	0.427522	-1.00478	1.54632	TDGF1
							male gamete generation (GO:0048232)	0.116636	07:00:51.618000	0.18398	0.398153	-0.718438	1.54371	RPL39L;PTTG1;FAM50A;SOD1
							regulation of viral entry into host cell (GO:0046596)	0.27832	09:26:57.944000	0.326501	0.468123	-1.19275	1.52551	IFITM3
							negative regulation of supramolecular fiber organization (GO:1902904)	0.141152	07:20:27.978000	0.189911	0.398153	-0.775661	1.51868	STMN2;PFN1
							protein import into mitochondrial matrix (GO:0030150)	0.214604	08:21:28.326000	0.256495	0.427522	-0.986449	1.51811	TOMM7
							ribosomal large subunit biogenesis (GO:0042273)	0.179108	07:58:22.879000	0.236144	0.419236	-0.880016	1.51342	NHP2;RPL14
							mitochondrial respiratory chain complex I biogenesis (GO:0097031)	0.183419	07:59:31.312000	0.24133	0.42224	-0.884272	1.49971	NDUFA11;NDUFA3
							RNA splicing, via transesterification reactions (GO:0000375)	0.269543	09:15:05.689000	0.316917	0.462182	-1.14121	1.49615	TRA2B
							regulation of cell cycle (GO:0051726)	0.11916	0.292707	0.198616	0.404919	-0.70035	1.48985	SON;CCND1;CALR;TBX3;MAP4K4
							regulation of epidermal growth factor-activated receptor activity (GO:0007176)	0.26066	09:07:23.917000	0.307197	0.457832	-1.10108	1.48045	SNX6
							NADH dehydrogenase complex assembly (GO:0010257)	0.183419	07:59:31.312000	0.24133	0.42224	-0.866805	1.47008	NDUFA11;NDUFA3
							positive regulation of cAMP biosynthetic process (GO:0030819)	0.224038	08:34:11.178000	0.266923	0.435447	-0.979967	1.46597	CALM1
							mitochondrial respiratory chain complex I assembly (GO:0032981)	0.183419	07:59:31.312000	0.24133	0.42224	-0.863988	1.46531	NDUFA11;NDUFA3
							regulation of interferon-gamma-mediated signaling pathway (GO:0060334)	0.242569	08:49:52.508000	0.287343	0.444593	-1.03403	1.46467	HSP90AB1
							phosphatidylserine acyl-chain remodeling (GO:0036150)	0.233359	08:43:38.014000	0.277205	0.440267	-0.998388	1.45283	PLA2G1B
							regulation of translational initiation (GO:0006446)	0.174812	07:52:24.248000	0.230964	0.419236	-0.832161	1.45133	EIF4A2;EIF5
							circulatory system development (GO:0072359)	0.14611	07:21:51.776000	0.210936	0.409929	-0.751898	1.4462	CACYBP;CRIP1;TDGF1
							positive regulation of leukocyte mediated cytotoxicity (GO:0001912)	0.269543	09:15:05.689000	0.316917	0.462182	-1.10259	1.44552	LAMP1
							B cell proliferation (GO:0042100)	0.304025	09:58:24.230000	0.354458	0.488818	-1.21347	1.44481	HSPD1
							positive regulation of cation transmembrane transport (GO:1904064)	0.195391	0.337711	0.235196	0.419236	-0.884789	1.44464	TMSB4X
							protein homotetramerization (GO:0051289)	0.153611	07:29:18.621000	0.205206	0.40682	-0.769566	1.44165	ATPIF1;ALDOA
							glycosaminoglycan metabolic process (GO:0030203)	0.170533	07:50:54.144000	0.225792	0.4188	-0.814296	1.44035	SDC4;HEXA
							positive regulation of T cell mediated immunity (GO:0002711)	0.233359	08:43:38.014000	0.277205	0.440267	-0.988974	1.43913	HSPD1
							Wnt signaling pathway (GO:0016055)	0.14611	07:21:51.776000	0.210936	0.409929	-0.746675	1.43615	UBB;VPS26A;VPS35
							glyceraldehyde-3-phosphate metabolic process (GO:0019682)	0.205055	08:13:36.463000	0.24592	0.42224	-0.904405	1.43301	TPI1
							macromolecule modification (GO:0043412)	0.26066	09:07:23.917000	0.307197	0.457832	-1.06371	1.4302	PARP1
							regulation of calcium ion transport into cytosol (GO:0010522)	0.242569	0.367969	0.287343	0.444593	-1.00729	1.42679	PLA2G1B
							regulation of centrosome duplication (GO:0010824)	0.269543	09:15:05.689000	0.316917	0.462182	-1.08578	1.42349	PLK2
							glycogen biosynthetic process (GO:0005978)	0.205055	08:13:36.463000	0.24592	0.42224	-0.897089	1.42141	UBB
							regulation of response to external stimulus (GO:0032101)	0.140537	07:20:27.978000	0.203696	0.40572	-0.724182	1.42105	TMSB4X;PARK7;CALM1
							response to reactive oxygen species (GO:0000302)	0.166273	07:42:14.430000	0.220629	0.4188	-0.790013	1.41738	GPX1;SOD1
							cellular response to peptide hormone stimulus (GO:0071375)	0.148923	07:29:08.324000	0.214577	0.411939	-0.741186	1.41146	PKM;PARP1;PLA2G1B
							response to interferon-beta (GO:0035456)	0.214604	08:21:28.326000	0.256495	0.427522	-0.906032	1.39435	IFITM3
							positive regulation of cellular component organization (GO:0051130)	0.137778	07:18:20.392000	0.200099	0.404919	-0.703359	1.39413	VCP;GPX1;FNIP1
							dicarboxylic acid metabolic process (GO:0043648)	0.162031	0.320627	0.215476	0.412268	-0.762963	1.38857	MDH2;SUCLG1
							TOR signaling (GO:0031929)	0.251669	08:58:41.415000	0.29734	0.451861	-1.00529	1.38694	FNIP1
							regulation of natural killer cell mediated cytotoxicity (GO:0042269)	0.242569	08:49:52.508000	0.287343	0.444593	-0.976773	1.38357	LAMP1
							positive regulation of histone methylation (GO:0031062)	0.26066	09:07:23.917000	0.307197	0.457832	-1.029	1.38353	SNW1
							regulation of organelle organization (GO:0033043)	0.157467	07:34:18.430000	0.225579	0.4188	-0.747216	1.38126	STMN2;VPS35;SQSTM1
							regulation of cytokine production (GO:0001817)	0.143315	07:20:27.978000	0.207309	0.409929	-0.710235	1.37978	UBB;HSPD1;SOD1
							regulation of cAMP biosynthetic process (GO:0030817)	0.214604	08:21:28.326000	0.256495	0.427522	-0.895819	1.37863	CALM1
							chromatin remodeling (GO:0006338)	0.166158	0.321	0.236688	0.419326	-0.767405	1.37735	ANP32A;ANP32B;BPTF
							negative regulation of hydrolase activity (GO:0051346)	0.143315	07:20:27.978000	0.207309	0.409929	-0.708734	1.37687	WNK1;RCC2;ATPIF1
							glycogen catabolic process (GO:0005980)	0.205055	08:13:36.463000	0.24592	0.42224	-0.867506	1.37454	CALM1
							positive regulation of activated T cell proliferation (GO:0042104)	0.214604	08:21:28.326000	0.256495	0.427522	-0.89278	1.37395	IGFBP2
							regulation of NIK/NF-kappaB signaling (GO:1901222)	0.29556	09:48:22.090000	0.34527	0.48162	-1.12511	1.37138	TMSB4X
							regulation of developmental growth (GO:0048638)	0.312389	10:04:10.415000	0.363517	0.492517	-1.1761	1.3684	SOD1
							protein homotrimerization (GO:0070207)	0.242569	0.367969	0.287343	0.444593	-0.965366	1.36741	MIF
							dopaminergic neuron differentiation (GO:0071542)	0.224038	08:34:11.178000	0.266923	0.435447	-0.913503	1.36655	MANF
							negative regulation of cell-matrix adhesion (GO:0001953)	0.286992	0.401646	0.335951	0.47486	-1.09334	1.36481	RCC2
							respiratory chain complex IV assembly (GO:0008535)	0.269543	09:15:05.689000	0.316917	0.462182	-1.03985	1.36327	COX10
							glutathione derivative biosynthetic process (GO:1901687)	0.242569	0.367969	0.287343	0.444593	-0.960691	1.36079	GSTA4
							apoptotic process (GO:0006915)	0.147588	07:25:46.901000	0.238961	0.42224	-0.709441	1.3574	FXR1;PARP1;FEM1B;JADE1;HSPD1
							regulation of cardiac muscle contraction by regulation of the release of sequestered calcium ion (GO:0010881)	0.195391	08:06:18.249000	0.235196	0.419236	-0.829261	1.35398	CALM1
							regulation of viral genome replication (GO:0045069)	0.179108	07:58:22.879000	0.236144	0.419236	-0.78688	1.35325	IFITM3;BANF1
							glycerophospholipid metabolic process (GO:0006650)	0.183419	07:59:31.312000	0.24133	0.42224	-0.797904	1.35323	PLA2G1B;PAFAH1B1
							hepaticobiliary system development (GO:0061008)	0.233359	0.363634	0.277205	0.440267	-0.929923	1.3532	ARID5B
							cellular response to nerve growth factor stimulus (GO:1990090)	0.242569	0.367969	0.287343	0.444593	-0.951513	1.34779	STMN2
							response to alcohol (GO:0097305)	0.269543	09:15:05.689000	0.316917	0.462182	-1.02798	1.34771	SOD1
							blood vessel endothelial cell migration (GO:0043534)	0.205055	0.342783	0.24592	0.42224	-0.848343	1.34418	TDGF1
							positive regulation of cAMP metabolic process (GO:0030816)	0.27832	0.393726	0.326501	0.468123	-1.04909	1.34177	CALM1
							cellular amino acid catabolic process (GO:0009063)	0.251669	08:58:41.415000	0.29734	0.451861	-0.970813	1.33937	DBT
							positive regulation of DNA-templated transcription, elongation (GO:0032786)	0.26066	09:07:23.917000	0.307197	0.457832	-0.994357	1.33695	HMGN1
							regulation of transcription regulatory region DNA binding (GO:2000677)	0.27832	09:26:57.944000	0.326501	0.468123	-1.0437	1.33488	PARK7
							negative regulation of protein modification process (GO:0031400)	0.179108	07:58:22.879000	0.236144	0.419236	-0.776112	1.33473	PARK7;ATG14
							regulation of extrinsic apoptotic signaling pathway (GO:2001236)	0.162031	07:41:42.175000	0.215476	0.412268	-0.732537	1.33319	FEM1B;PARK7
							negative regulation of viral transcription (GO:0032897)	0.251669	08:58:41.415000	0.29734	0.451861	-0.962223	1.32752	IFITM3
							positive regulation of microtubule polymerization or depolymerization (GO:0031112)	0.26066	09:07:23.917000	0.307197	0.457832	-0.977932	1.31487	STMN2
							negative regulation of cytoskeleton organization (GO:0051494)	0.26066	09:07:23.917000	0.307197	0.457832	-0.977597	1.31442	PFN1
							chromosome condensation (GO:0030261)	0.251669	08:58:41.415000	0.29734	0.451861	-0.952489	1.31409	SMC4
							negative regulation of neuron apoptotic process (GO:0043524)	0.179108	0.332209	0.236144	0.419236	-0.758148	1.30384	PARK7;SOD1
							cellular modified amino acid biosynthetic process (GO:0042398)	0.26066	09:07:23.917000	0.307197	0.457832	-0.966805	1.29991	ATPIF1
							MyD88-independent toll-like receptor signaling pathway (GO:0002756)	0.312389	10:04:10.415000	0.363517	0.492517	-1.11716	1.29982	UBB
							positive regulation of ERBB signaling pathway (GO:1901186)	0.251669	08:58:41.415000	0.29734	0.451861	-0.93988	1.2967	UBB
							transition metal ion transport (GO:0000041)	0.286992	09:38:22.246000	0.335951	0.47486	-1.03529	1.29236	ATOX1
							positive regulation of cyclin-dependent protein kinase activity (GO:1904031)	0.27832	09:26:57.944000	0.326501	0.468123	-1.0076	1.28871	CCND1
							aminoglycan metabolic process (GO:0006022)	0.312389	10:04:10.415000	0.363517	0.492517	-1.10388	1.28436	SDC4
							chromatin assembly (GO:0031497)	0.187746	08:03:30.477000	0.246522	0.42224	-0.765037	1.27965	H2AFX;ANP32B
							regulation of protein localization to nucleus (GO:1900180)	0.286992	09:38:22.246000	0.335951	0.47486	-1.02101	1.27453	PARK7
							negative regulation of oxidative stress-induced intrinsic apoptotic signaling pathway (GO:1902176)	0.205055	08:13:36.463000	0.24592	0.42224	-0.803143	1.27256	PARK7
							negative regulation of lymphocyte proliferation (GO:0050672)	0.304025	09:58:24.230000	0.354458	0.488818	-1.06452	1.26746	SDC4
							lysosome localization (GO:0032418)	0.304025	09:58:24.230000	0.354458	0.488818	-1.06229	1.26481	S100A13
							carboxylic acid catabolic process (GO:0046395)	0.29556	09:48:22.090000	0.34527	0.48162	-1.03746	1.26454	HEXA
							negative regulation of epithelial cell proliferation (GO:0050680)	0.192087	08:06:18.249000	0.251717	0.427522	-0.763779	1.26009	ATPIF1;KLF9
							positive regulation of dephosphorylation (GO:0035306)	0.26066	09:07:23.917000	0.307197	0.457832	-0.933843	1.25559	CALM1
							microtubule polymerization or depolymerization (GO:0031109)	0.251669	08:58:41.415000	0.29734	0.451861	-0.908884	1.25393	STMN2
							positive regulation of catabolic process (GO:0009896)	0.174812	07:52:24.248000	0.230964	0.419236	-0.717071	1.2506	VCP;PLK2
							cilium assembly (GO:0060271)	0.135508	07:12:14.395000	0.233265	0.419236	-0.624586	1.24838	HSP90AA1;ATP6V0D1;DYNLL1;ATP6V1D;CDC14A;PAFAH1B1
							positive regulation of protein kinase activity (GO:0045860)	0.155032	07:29:18.621000	0.236416	0.419281	-0.668694	1.24653	CDKN1A;RPLP1;CALM1;MAP4K4
							response to organic cyclic compound (GO:0014070)	0.205186	08:13:36.463000	0.267317	0.435447	-0.786154	1.24514	SPP1;AQP3
							positive regulation of leukocyte cell-cell adhesion (GO:1903039)	0.233359	08:43:38.014000	0.277205	0.440267	-0.852038	1.23986	HSPD1
							positive regulation of endocytosis (GO:0045807)	0.183419	07:59:31.312000	0.24133	0.42224	-0.730433	1.2388	CALR;LYAR
							DNA conformation change (GO:0071103)	0.205055	08:13:36.463000	0.24592	0.42224	-0.779318	1.23481	TOP3B
							positive regulation of calcium-mediated signaling (GO:0050850)	0.29556	09:48:22.090000	0.34527	0.48162	-1.01014	1.23124	CALM1
							negative regulation of T cell activation (GO:0050868)	0.344857	10:33:25.131000	0.398509	0.514097	-1.15045	1.2248	SDC4
							protein localization to cilium (GO:0061512)	0.242569	08:49:52.508000	0.287343	0.444593	-0.862829	1.22217	ATP6V1D
							glutathione derivative metabolic process (GO:1901685)	0.242569	08:49:52.508000	0.287343	0.444593	-0.849707	1.20358	GSTA4
							peptidyl-lysine modification (GO:0018205)	0.163245	07:41:42.175000	0.232974	0.419236	-0.66062	1.19737	GCSH;MDM2;PARK7
							apoptotic cell clearance (GO:0043277)	0.27832	09:26:57.944000	0.326501	0.468123	-0.93283	1.19308	PDIA6
							activation of protein kinase B activity (GO:0032148)	0.312389	10:04:10.415000	0.363517	0.492517	-1.02517	1.19279	PARK7
							phosphatidylcholine metabolic process (GO:0046470)	0.213971	08:21:28.326000	0.277717	0.440267	-0.767134	1.18285	PLA2G1B;DBI
							negative regulation of Notch signaling pathway (GO:0045746)	0.304025	09:58:24.230000	0.354458	0.488818	-0.988812	1.17732	UBB
							positive regulation of transcription regulatory region DNA binding (GO:2000679)	0.214604	08:21:28.326000	0.256495	0.427522	-0.763061	1.17432	PARK7
							DNA synthesis involved in DNA repair (GO:0000731)	0.187746	08:03:30.477000	0.246522	0.42224	-0.701046	1.17261	VCP;UBB
							positive regulation of interleukin-12 production (GO:0032735)	0.269543	09:15:05.689000	0.316917	0.462182	-0.88471	1.15988	HSPD1
							regulation of DNA replication (GO:0006275)	0.170533	0.327016	0.225792	0.4188	-0.655527	1.15951	PLA2G1B;CALR
							regulation of telomere maintenance (GO:0032204)	0.269543	0.385483	0.316917	0.462182	-0.884054	1.15902	DHX36
							monocarboxylic acid biosynthetic process (GO:0072330)	0.200808	08:13:36.463000	0.262116	0.435322	-0.719317	1.1548	PLA2G1B;PARK7
							regulation of alcohol biosynthetic process (GO:1902930)	0.344857	10:33:25.131000	0.398509	0.514097	-1.0837	1.15374	SP1
							regulation of actin filament bundle assembly (GO:0032231)	0.26066	09:07:23.917000	0.307197	0.457832	-0.857631	1.15312	PFN1
							positive regulation of insulin secretion (GO:0032024)	0.320654	10:11:55.989000	0.372451	0.498655	-1.01114	1.15006	TRH
							viral genome replication (GO:0019079)	0.242569	08:49:52.508000	0.287343	0.444593	-0.810862	1.14856	VCP
							nuclear-transcribed mRNA catabolic process, deadenylation-dependent decay (GO:0000288)	0.179108	07:58:22.879000	0.236144	0.419236	-0.666109	1.14555	EIF4A2;CNOT8
							positive regulation of synaptic transmission (GO:0050806)	0.196442	08:07:25.800000	0.256916	0.427522	-0.70328	1.14451	PLK2;SQSTM1
							post-translational protein modification (GO:0043687)	0.140657	07:20:27.978000	0.251656	0.427522	-0.582161	1.14187	FEM1B;PSMB3;SPP1;ELOB;PDIA6;PSMA7;HSP90B1
							negative regulation of developmental growth (GO:0048640)	0.26066	0.380138	0.307197	0.457832	-0.84912	1.14168	WWC2
							lipid catabolic process (GO:0016042)	0.233359	08:43:38.014000	0.277205	0.440267	-0.783041	1.13946	PLA2G1B
							negative regulation of catalytic activity (GO:0043086)	0.27832	09:26:57.944000	0.326501	0.468123	-0.88912	1.13717	ATPIF1
							positive regulation of cation channel activity (GO:2001259)	0.312389	10:04:10.415000	0.363517	0.492517	-0.976039	1.13563	CALM1
							negative regulation of secretion by cell (GO:1903531)	0.312389	10:04:10.415000	0.363517	0.492517	-0.974117	1.13339	TRH
							negative regulation of GTPase activity (GO:0034260)	0.242569	08:49:52.508000	0.287343	0.444593	-0.796715	1.12852	RCC2
							positive regulation of protein modification process (GO:0031401)	0.135273	07:12:03.185000	0.209722	0.409929	-0.563802	1.12787	CCND1;ATG14;CALM1;FNIP1
							negative regulation of synaptic transmission (GO:0050805)	0.286992	09:38:22.246000	0.335951	0.47486	-0.902954	1.12716	PLK2
							positive regulation of proteolysis involved in cellular protein catabolic process (GO:1903052)	0.242569	08:49:52.508000	0.287343	0.444593	-0.795366	1.12661	ATPIF1
							regulation of ion homeostasis (GO:2000021)	0.251669	08:58:41.415000	0.29734	0.451861	-0.81091	1.11877	WNK1
							positive regulation of phosphatidylinositol 3-kinase activity (GO:0043552)	0.269543	09:15:05.689000	0.316917	0.462182	-0.849107	1.1132	ATG14
							positive regulation of telomere maintenance via telomerase (GO:0032212)	0.328819	10:18:49.615000	0.381259	0.502919	-0.991297	1.10257	CCT3
							cellular response to hydrogen peroxide (GO:0070301)	0.29556	09:48:22.090000	0.34527	0.48162	-0.903112	1.10079	PARK7
							regulation of protein autophosphorylation (GO:0031952)	0.320654	10:11:55.989000	0.372451	0.498655	-0.964972	1.09755	CALM1
							regulation of voltage-gated calcium channel activity (GO:1901385)	0.269543	09:15:05.689000	0.316917	0.462182	-0.836757	1.09701	AHNAK
							receptor-mediated endocytosis (GO:0006898)	0.192568	08:06:18.249000	0.285616	0.444593	-0.665561	1.09638	HSP90AA1;DNAJC13;CALR;HSP90B1
							histone H3-K4 methylation (GO:0051568)	0.251669	08:58:41.415000	0.29734	0.451861	-0.793669	1.09498	DPY30
							bone development (GO:0060348)	0.344857	0.439874	0.398509	0.514097	-1.02356	1.0897	PPIB
							Fc-epsilon receptor signaling pathway (GO:0038095)	0.178162	07:58:22.879000	0.266954	0.435447	-0.630361	1.08741	UBB;PSMB3;CALM1;PSMA7
							defense response to Gram-positive bacterium (GO:0050830)	0.187746	08:03:30.477000	0.246522	0.42224	-0.649581	1.08653	PLA2G1B;RPL39
							positive regulation of Notch signaling pathway (GO:0045747)	0.336886	10:24:24.208000	0.389945	0.507454	-0.997434	1.08522	SNW1
							transition metal ion homeostasis (GO:0055076)	0.26066	09:07:23.917000	0.307197	0.457832	-0.800285	1.07601	ATOX1
							protein K11-linked ubiquitination (GO:0070979)	0.29556	09:48:22.090000	0.34527	0.48162	-0.882648	1.07585	UBE2C
							positive regulation of proteasomal ubiquitin-dependent protein catabolic process (GO:0032436)	0.209574	08:21:12.427000	0.272518	0.440267	-0.685216	1.07077	VCP;MDM2
							positive regulation of tumor necrosis factor superfamily cytokine production (GO:1903557)	0.328819	0.429741	0.381259	0.502919	-0.956571	1.06395	MIF
							mRNA stabilization (GO:0048255)	0.336886	10:24:24.208000	0.389945	0.507454	-0.970082	1.05546	YBX3
							carboxylic acid metabolic process (GO:0019752)	0.336886	10:24:24.208000	0.389945	0.507454	-0.964027	1.04887	MIF
							Fc receptor signaling pathway (GO:0038093)	0.180537	07:59:31.312000	0.270049	0.439477	-0.60855	1.04173	UBB;PSMB3;CALM1;PSMA7
							stress-activated protein kinase signaling cascade (GO:0031098)	0.209574	08:21:12.427000	0.272518	0.440267	-0.663914	1.03749	UBB;MAP4K4
							positive regulation of cellular protein localization (GO:1903829)	0.192087	08:06:18.249000	0.251717	0.427522	-0.625007	1.03114	HSP90AB1;PARK7
							mitochondrial transmembrane transport (GO:1990542)	0.328819	10:18:49.615000	0.381259	0.502919	-0.927046	1.03111	TIMM13
							positive regulation of catalytic activity (GO:0043085)	0.336886	10:24:24.208000	0.389945	0.507454	-0.947357	1.03073	SOD1
							renal water homeostasis (GO:0003091)	0.320654	10:11:55.989000	0.372451	0.498655	-0.902287	1.02626	AQP3
							transcription initiation from RNA polymerase I promoter (GO:0006361)	0.336886	0.433614	0.389945	0.507454	-0.94308	1.02608	GTF2H1
							maturation of LSU-rRNA (GO:0000470)	0.242569	08:49:52.508000	0.287343	0.444593	-0.724012	1.02554	NHP2
							maturation of SSU-rRNA from tricistronic rRNA transcript (SSU-rRNA, 5.8S rRNA, LSU-rRNA) (GO:0000462)	0.352733	10:40:40.168000	0.406953	0.519079	-0.976215	1.01726	RPS21
							vesicle organization (GO:0016050)	0.199134	0.342092	0.278123	0.440384	-0.629649	1.01611	DNAJC13;SQSTM1;SNX6
							positive regulation of viral genome replication (GO:0045070)	0.320654	10:11:55.989000	0.372451	0.498655	-0.893054	1.01575	PPIB
							regulation of phosphatase activity (GO:0010921)	0.218378	08:29:19.071000	0.282915	0.444593	-0.66494	1.01172	WNK1;HSP90B1
							positive regulation of apoptotic process (GO:0043065)	0.166747	07:42:32.175000	0.277791	0.440267	-0.564587	1.01133	UBB;FAM162A;DDIT3;SQSTM1;HSPD1;SOD1
							regulation of bone resorption (GO:0045124)	0.242569	08:49:52.508000	0.287343	0.444593	-0.713493	1.01064	SPP1
							prostaglandin metabolic process (GO:0006693)	0.269543	09:15:05.689000	0.316917	0.462182	-0.769352	1.00864	MIF
							misfolded or incompletely synthesized protein catabolic process (GO:0006515)	0.269543	09:15:05.689000	0.316917	0.462182	-0.768913	1.00807	VCP
							positive regulation of lipid kinase activity (GO:0090218)	0.286992	09:38:22.246000	0.335951	0.47486	-0.806832	1.00717	ATG14
							transcription from RNA polymerase I promoter (GO:0006360)	0.336886	10:24:24.208000	0.389945	0.507454	-0.923414	1.00468	GTF2H1
							B cell activation (GO:0042113)	0.222792	0.357074	0.288109	0.444593	-0.663381	0.996077	KLF6;HSPD1
							negative regulation of telomere maintenance via telomere lengthening (GO:1904357)	0.27832	09:26:57.944000	0.326501	0.468123	-0.776012	0.992508	PARP1
							response to interferon-gamma (GO:0034341)	0.200808	08:13:36.463000	0.262116	0.435322	-0.617372	0.991132	IFITM3;TDGF1
							positive regulation of nucleocytoplasmic transport (GO:0046824)	0.336886	10:24:24.208000	0.389945	0.507454	-0.905167	0.98483	ANP32B
							centromere complex assembly (GO:0034508)	0.360514	10:49:29.911000	0.41528	0.524656	-0.964916	0.984431	CENPM
							vacuolar transport (GO:0007034)	0.304025	09:58:24.230000	0.354458	0.488818	-0.82548	0.982853	ATP6V0D1
							negative regulation of intracellular steroid hormone receptor signaling pathway (GO:0033144)	0.29556	09:48:22.090000	0.34527	0.48162	-0.79989	0.974974	CALR
							negative regulation of neuron differentiation (GO:0045665)	0.183419	07:59:31.312000	0.24133	0.42224	-0.571878	0.969894	STMN2;CALR
							RNA phosphodiester bond hydrolysis (GO:0090501)	0.29556	09:48:22.090000	0.34527	0.48162	-0.794114	0.967933	NHP2
							NAD metabolic process (GO:0019674)	0.251669	0.37409	0.29734	0.451861	-0.701351	0.967613	VCP
							7-methylguanosine RNA capping (GO:0009452)	0.328819	10:18:49.615000	0.381259	0.502919	-0.869746	0.967374	GTF2H1
							regulation of rhodopsin mediated signaling pathway (GO:0022400)	0.27832	09:26:57.944000	0.326501	0.468123	-0.755738	0.966577	CALM1
							regulation of Notch signaling pathway (GO:0008593)	0.209574	0.34806	0.272518	0.440267	-0.613839	0.959233	SNW1;UBB
							connective tissue development (GO:0061448)	0.312389	10:04:10.415000	0.363517	0.492517	-0.823546	0.958199	ARID5B
							regulation of wound healing (GO:0061041)	0.344857	10:33:25.131000	0.398509	0.514097	-0.898436	0.956497	SRSF6
							positive regulation of telomere maintenance via telomere lengthening (GO:1904358)	0.344857	10:33:25.131000	0.398509	0.514097	-0.896719	0.954669	CCT3
							positive regulation of neurogenesis (GO:0050769)	0.205186	08:13:36.463000	0.267317	0.435447	-0.601532	0.952731	SPEN;SNW1
							negative regulation of protein complex assembly (GO:0031333)	0.352733	10:40:40.168000	0.406953	0.519079	-0.913414	0.951818	PARK7
							regulation of striated muscle contraction (GO:0006942)	0.304025	09:58:24.230000	0.354458	0.488818	-0.799346	0.951737	CALM1
							regulation of protein insertion into mitochondrial membrane involved in apoptotic signaling pathway (GO:1900739)	0.312389	10:04:10.415000	0.363517	0.492517	-0.816454	0.949948	DYNLL1
							regulation of ubiquitin protein ligase activity (GO:1904666)	0.360514	10:49:29.911000	0.41528	0.524656	-0.928125	0.946896	UBE2C
							stimulatory C-type lectin receptor signaling pathway (GO:0002223)	0.180945	07:59:31.312000	0.255405	0.427522	-0.550397	0.940936	UBB;PSMB3;PSMA7
							negative regulation of T cell proliferation (GO:0042130)	0.26066	09:07:23.917000	0.307197	0.457832	-0.694159	0.933324	SDC4
							regulation of cell morphogenesis involved in differentiation (GO:0010769)	0.360514	10:49:29.911000	0.41528	0.524656	-0.914261	0.932751	FXR1
							innate immune response activating cell surface receptor signaling pathway (GO:0002220)	0.189984	08:06:18.249000	0.266735	0.435447	-0.556526	0.924289	UBB;PSMB3;PSMA7
							exonucleolytic nuclear-transcribed mRNA catabolic process involved in deadenylation-dependent decay (GO:0043928)	0.336886	10:24:24.208000	0.389945	0.507454	-0.847269	0.921837	CNOT8
							negative regulation of intrinsic apoptotic signaling pathway in response to DNA damage (GO:1902230)	0.26066	09:07:23.917000	0.307197	0.457832	-0.685506	0.92169	MIF
							negative regulation of endothelial cell proliferation (GO:0001937)	0.312389	10:04:10.415000	0.363517	0.492517	-0.788841	0.91782	ATPIF1
							regulation of defense response (GO:0031347)	0.231641	08:43:38.014000	0.298484	0.452789	-0.626305	0.916014	TMSB4X;PARK7
							regulation of synapse assembly (GO:0051963)	0.352733	10:40:40.168000	0.406953	0.519079	-0.875634	0.91245	VPS35
							positive regulation of MAP kinase activity (GO:0043406)	0.166452	07:42:14.430000	0.251585	0.427522	-0.503092	0.90207	UBB;PLA2G1B;TDGF1;SOD1
							protein trimerization (GO:0070206)	0.328819	10:18:49.615000	0.381259	0.502919	-0.808068	0.898772	MIF
							regulation of phosphatidylinositol 3-kinase activity (GO:0043551)	0.336886	10:24:24.208000	0.389945	0.507454	-0.824723	0.897307	ATG14
							sensory perception of sound (GO:0007605)	0.258293	09:07:23.917000	0.329441	0.471542	-0.656195	0.888264	TIMM13;SOD1
							phosphatidylethanolamine acyl-chain remodeling (GO:0036152)	0.27832	09:26:57.944000	0.326501	0.468123	-0.691467	0.884376	PLA2G1B
							negative regulation of microtubule polymerization or depolymerization (GO:0031111)	0.286992	09:38:22.246000	0.335951	0.47486	-0.707024	0.88258	STMN2
							positive regulation of monooxygenase activity (GO:0032770)	0.251669	08:58:41.415000	0.29734	0.451861	-0.638245	0.88055	PARK7
							cellular response to glucose stimulus (GO:0071333)	0.286992	09:38:22.246000	0.335951	0.47486	-0.70518	0.880277	TRA2B
							regulation of cation channel activity (GO:2001257)	0.213971	08:21:28.326000	0.277717	0.440267	-0.568807	0.877051	AHNAK;CALM1
							skeletal system morphogenesis (GO:0048705)	0.320654	0.424954	0.372451	0.498655	-0.769863	0.875638	ANKRD11
							cellular response to topologically incorrect protein (GO:0035967)	0.286992	09:38:22.246000	0.335951	0.47486	-0.700829	0.874846	HSPA5
							TRIF-dependent toll-like receptor signaling pathway (GO:0035666)	0.304025	09:58:24.230000	0.354458	0.488818	-0.732808	0.872514	UBB
							regulation of peptidyl-threonine phosphorylation (GO:0010799)	0.368202	0.457496	0.42349	0.531395	-0.872774	0.872009	CALM1
							regulation of cellular response to heat (GO:1900034)	0.244953	08:53:10.626000	0.314	0.462182	-0.61842	0.869925	HSP90AA1;HSP90AB1
							regulation of ryanodine-sensitive calcium-release channel activity (GO:0060314)	0.269543	09:15:05.689000	0.316917	0.462182	-0.663341	0.869659	CALM1
							positive regulation of cytokine secretion (GO:0050715)	0.222792	08:34:11.178000	0.288109	0.444593	-0.577921	0.867758	DHX36;MIF
							determination of bilateral symmetry (GO:0009855)	0.304025	09:58:24.230000	0.354458	0.488818	-0.728062	0.866863	TDGF1
							negative regulation of cation channel activity (GO:2001258)	0.312389	10:04:10.415000	0.363517	0.492517	-0.742805	0.864257	CALM1
							nucleosome organization (GO:0034728)	0.249397	0.37409	0.319156	0.464364	-0.621037	0.862439	H2AFX;ANP32B
							response to calcium ion (GO:0051592)	0.249397	08:58:41.415000	0.319156	0.464364	-0.620171	0.861237	CALM1;AQP3
							mitotic nuclear division (GO:0140014)	0.227213	08:40:59.086000	0.293299	0.451861	-0.581134	0.861163	UBE2C;SMC4
							protein alpha-1,2-demannosylation (GO:0036508)	0.26066	09:07:23.917000	0.307197	0.457832	-0.640021	0.860533	UBB
							negative regulation of protein binding (GO:0032091)	0.196442	08:07:25.800000	0.256916	0.427522	-0.527932	0.859151	HSPA5;PARK7
							nucleotide-binding domain, leucine rich repeat containing receptor signaling pathway (GO:0035872)	0.269543	09:15:05.689000	0.316917	0.462182	-0.653379	0.856599	UBB
							regulation of T cell differentiation (GO:0045580)	0.336886	10:24:24.208000	0.389945	0.507454	-0.784236	0.853256	SOD1
							phosphatidylserine metabolic process (GO:0006658)	0.286992	09:38:22.246000	0.335951	0.47486	-0.678779	0.847321	PLA2G1B
							regulation of androgen receptor signaling pathway (GO:0060765)	0.251669	08:58:41.415000	0.29734	0.451861	-0.605181	0.834932	PARK7
							positive regulation of autophagy (GO:0010508)	0.196442	08:07:25.800000	0.256916	0.427522	-0.513024	0.834891	PLK2;PARK7
							regulation of type I interferon production (GO:0032479)	0.276094	09:26:57.944000	0.349877	0.487247	-0.645176	0.830351	UBB;DHX36
							regulation of endothelial cell migration (GO:0010594)	0.205186	08:13:36.463000	0.267317	0.435447	-0.523885	0.82975	CALR;TDGF1
							ERBB signaling pathway (GO:0038127)	0.253844	09:02:23.867000	0.324304	0.468123	-0.603221	0.827036	HSP90AA1;UBB
							cytoplasmic pattern recognition receptor signaling pathway (GO:0002753)	0.26066	09:07:23.917000	0.307197	0.457832	-0.613767	0.825234	UBB
							regulation of protein localization to cell surface (GO:2000008)	0.286992	09:38:22.246000	0.335951	0.47486	-0.657368	0.820593	HSP90AB1
							positive regulation of peptidyl-threonine phosphorylation (GO:0010800)	0.269543	09:15:05.689000	0.316917	0.462182	-0.62416	0.818291	CALM1
							neuron migration (GO:0001764)	0.390718	11:26:43.261000	0.447438	0.551667	-0.869275	0.816918	PAFAH1B1
							negative regulation of extrinsic apoptotic signaling pathway (GO:2001237)	0.236074	08:48:25.471000	0.303663	0.457832	-0.565882	0.816915	GPX1;PARK7
							negative regulation of cysteine-type endopeptidase activity (GO:2000117)	0.218378	08:29:19.071000	0.282915	0.444593	-0.53349	0.81172	GPX1;FNIP1
							negative regulation of calcium ion transmembrane transporter activity (GO:1901020)	0.328819	10:18:49.615000	0.381259	0.502919	-0.729439	0.811318	CALM1
							DNA damage checkpoint (GO:0000077)	0.375798	11:10:07.538000	0.431585	0.539561	-0.825943	0.808353	H2AFX
							negative regulation of G0 to G1 transition (GO:0070317)	0.368202	10:58:47.670000	0.42349	0.531395	-0.80144	0.800738	MGA
							regulation of signal transduction by p53 class mediator (GO:1901796)	0.233505	08:43:38.014000	0.320192	0.464963	-0.549721	0.799598	UBB;MDM2;TAF3
							entry into host cell (GO:0030260)	0.336886	10:24:24.208000	0.389945	0.507454	-0.726079	0.789981	UBB
							mRNA splice site selection (GO:0006376)	0.26066	09:07:23.917000	0.307197	0.457832	-0.577889	0.776995	SRSF6
							histone deacetylation (GO:0016575)	0.360514	10:49:29.911000	0.41528	0.524656	-0.756518	0.771818	MIER1
							positive regulation of lipid biosynthetic process (GO:0046889)	0.29556	09:48:22.090000	0.34527	0.48162	-0.63273	0.771225	FABP3
							protein export from nucleus (GO:0006611)	0.29556	09:48:22.090000	0.34527	0.48162	-0.631293	0.769474	CALR
							regulation of peptidyl-tyrosine phosphorylation (GO:0050730)	0.276094	09:26:57.944000	0.349877	0.487247	-0.597077	0.768447	MIF;TDGF1
							sensory perception of mechanical stimulus (GO:0050954)	0.244953	08:53:10.626000	0.314	0.462182	-0.545884	0.767889	TIMM13;SOD1
							positive regulation of ubiquitin-protein transferase activity (GO:0051443)	0.320654	10:11:55.989000	0.372451	0.498655	-0.668166	0.759968	UBE2C
							negative regulation of neurogenesis (GO:0050768)	0.336886	10:24:24.208000	0.389945	0.507454	-0.697092	0.758443	CALR
							protein deacetylation (GO:0006476)	0.328819	10:18:49.615000	0.381259	0.502919	-0.680808	0.757227	MIER1
							regulation of DNA repair (GO:0006282)	0.368202	10:58:47.670000	0.42349	0.531395	-0.757883	0.757219	H2AFX
							positive regulation of cyclin-dependent protein serine/threonine kinase activity (GO:0045737)	0.312389	10:04:10.415000	0.363517	0.492517	-0.650354	0.75669	CCND1
							regulation of cellular protein localization (GO:1903827)	0.269543	09:15:05.689000	0.316917	0.462182	-0.574617	0.753339	PARP1
							natural killer cell activation (GO:0030101)	0.360514	10:49:29.911000	0.41528	0.524656	-0.737974	0.752899	PRDX1
							transcription elongation from RNA polymerase I promoter (GO:0006362)	0.29556	09:48:22.090000	0.34527	0.48162	-0.617606	0.75279	GTF2H1
							response to zinc ion (GO:0010043)	0.328819	10:18:49.615000	0.381259	0.502919	-0.675958	0.751833	CRIP1
							positive regulation of peptide hormone secretion (GO:0090277)	0.383303	11:19:03.256000	0.439567	0.545925	-0.782521	0.750382	TRH
							protein modification by small protein removal (GO:0070646)	0.207561	0.345731	0.319506	0.464364	-0.474905	0.746708	VCP;UBB;PSMB3;MDM2;PSMA7
							chromatin remodeling at centromere (GO:0031055)	0.328819	10:18:49.615000	0.381259	0.502919	-0.670357	0.745603	CENPM
							regulation of myoblast differentiation (GO:0045661)	0.304025	09:58:24.230000	0.354458	0.488818	-0.620339	0.738603	TBX3
							phosphatidic acid biosynthetic process (GO:0006654)	0.390718	11:26:43.261000	0.447438	0.551667	-0.784813	0.737543	PLA2G1B
							endocytosis (GO:0006897)	0.21182	08:21:28.326000	0.325019	0.468123	-0.475168	0.737469	HSP90AA1;DNAJC13;CALR;HSP90B1;SNX6
							regulation of protein phosphorylation (GO:0001932)	0.207561	08:17:51.133000	0.319506	0.464364	-0.468859	0.737202	CCND1;PARK7;ATG14;FNIP1;SOD1
							regulation of sodium ion transport (GO:0002028)	0.352733	10:40:40.168000	0.406953	0.519079	-0.707367	0.737108	WNK1
							microtubule cytoskeleton organization involved in mitosis (GO:1902850)	0.419502	11:54:43.115000	0.477836	0.570515	-0.848491	0.737074	PLK2
							positive regulation of programmed cell death (GO:0043068)	0.199129	08:12:36.782000	0.308518	0.458995	-0.453276	0.731496	UBB;FAM162A;SQSTM1;HSPD1;SOD1
							androgen receptor signaling pathway (GO:0030521)	0.390718	11:26:43.261000	0.447438	0.551667	-0.778212	0.731339	CCNE1
							mitochondrion disassembly (GO:0061726)	0.375798	11:10:07.538000	0.431585	0.539561	-0.746214	0.730322	SQSTM1
							regulation of protein targeting to mitochondrion (GO:1903214)	0.289431	09:42:48.392000	0.365067	0.493829	-0.586918	0.727683	ATPIF1;TOMM7
							carbohydrate derivative biosynthetic process (GO:1901137)	0.304025	09:58:24.230000	0.354458	0.488818	-0.610579	0.726982	TPI1
							cilium organization (GO:0044782)	0.20237	08:13:36.463000	0.298163	0.452707	-0.454697	0.726451	ATP6V0D1;DYNLL1;ATP6V1D;CDC14A
							negative regulation of protein kinase B signaling (GO:0051898)	0.352733	10:40:40.168000	0.406953	0.519079	-0.696912	0.726213	DDIT3
							regulation of ion transmembrane transporter activity (GO:0032412)	0.405283	11:43:43.561000	0.462851	0.563716	-0.803599	0.725785	WNK1
							double-strand break repair (GO:0006302)	0.243063	08:50:28.788000	0.3317	0.474376	-0.511954	0.724125	VCP;PARP1;H2AFX
							cellular response to peptide (GO:1901653)	0.398045	11:34:52.655000	0.455199	0.55639	-0.783664	0.721905	MDM2
							termination of RNA polymerase I transcription (GO:0006363)	0.320654	0.424954	0.372451	0.498655	-0.633042	0.720018	GTF2H1
							lymphocyte proliferation (GO:0046651)	0.360514	10:49:29.911000	0.41528	0.524656	-0.703908	0.718145	HSPD1
							regulation of ATP metabolic process (GO:1903578)	0.412435	11:50:05.814000	0.470396	0.567732	-0.807987	0.715614	ATPIF1
							organophosphate biosynthetic process (GO:0090407)	0.360514	10:49:29.911000	0.41528	0.524656	-0.691611	0.705599	TPI1
							CENP-A containing chromatin organization (GO:0061641)	0.312389	0.419565	0.363517	0.492517	-0.606028	0.705116	CENPM
							regulation of G0 to G1 transition (GO:0070316)	0.383303	0.471565	0.439567	0.545925	-0.734992	0.704806	MGA
							CENP-A containing nucleosome assembly (GO:0034080)	0.312389	10:04:10.415000	0.363517	0.492517	-0.605528	0.704535	CENPM
							positive regulation of proteasomal protein catabolic process (GO:1901800)	0.222792	08:34:11.178000	0.288109	0.444593	-0.469044	0.704277	VCP;MDM2
							negative regulation of transmembrane receptor protein serine/threonine kinase signaling pathway (GO:0090101)	0.240511	0.367969	0.308835	0.459065	-0.492918	0.702403	UBB;SNX6
							tRNA aminoacylation (GO:0043039)	0.390718	11:26:43.261000	0.447438	0.551667	-0.742832	0.69809	PPA1
							regulation of autophagy of mitochondrion (GO:1903146)	0.286992	09:38:22.246000	0.335951	0.47486	-0.558105	0.696683	PARK7
							protein acetylation (GO:0006473)	0.336886	10:24:24.208000	0.389945	0.507454	-0.636945	0.693002	MDH2
							positive regulation of B cell proliferation (GO:0030890)	0.312389	10:04:10.415000	0.363517	0.492517	-0.591489	0.6882	MIF
							protein deubiquitination (GO:0016579)	0.199129	0.342092	0.308518	0.458995	-0.425788	0.687137	VCP;UBB;PSMB3;MDM2;PSMA7
							negative regulation of cell projection organization (GO:0031345)	0.398045	11:34:52.655000	0.455199	0.55639	-0.745556	0.6868	STMN2
							positive regulation of substrate adhesion-dependent cell spreading (GO:1900026)	0.286992	09:38:22.246000	0.335951	0.47486	-0.549118	0.685465	CALR
							regulation of actin polymerization or depolymerization (GO:0008064)	0.29556	0.408589	0.34527	0.48162	-0.56194	0.684941	PFN1
							positive regulation of transmembrane receptor protein serine/threonine kinase signaling pathway (GO:0090100)	0.262743	09:11:18.082000	0.334568	0.47486	-0.510377	0.682158	HSP90AB1;SNW1
							negative regulation of cytokine secretion (GO:0050710)	0.390718	11:26:43.261000	0.447438	0.551667	-0.725507	0.681808	TMSB4X
							7-methylguanosine mRNA capping (GO:0006370)	0.328819	10:18:49.615000	0.381259	0.502919	-0.610157	0.678646	GTF2H1
							regulation of dendrite development (GO:0050773)	0.368202	10:58:47.670000	0.42349	0.531395	-0.671016	0.670428	FXR1
							positive regulation of protein localization to plasma membrane (GO:1903078)	0.412435	11:50:05.814000	0.470396	0.567732	-0.752982	0.666898	SQSTM1
							negative regulation of multi-organism process (GO:0043901)	0.336886	10:24:24.208000	0.389945	0.507454	-0.612474	0.666377	CALR
							regulation of cell proliferation (GO:0042127)	0.181606	07:59:31.312000	0.364746	0.493788	-0.387772	0.661507	CDKN1A;FABP3;RPS9;MDM2;NAP1L1;CALR;CNOT8;SGK1;SLC25A5;TDGF1;TBX3;NME1
							regulation of primary metabolic process (GO:0080090)	0.236684	08:48:49.341000	0.324028	0.468123	-0.457948	0.659917	PSMB3;CACYBP;PSMA7
							negative regulation of cell morphogenesis involved in differentiation (GO:0010771)	0.312389	10:04:10.415000	0.363517	0.492517	-0.565377	0.657819	RCC2
							positive regulation of telomere maintenance (GO:0032206)	0.328819	10:18:49.615000	0.381259	0.502919	-0.59078	0.657094	DHX36
							regulation of B cell proliferation (GO:0030888)	0.412435	11:50:05.814000	0.470396	0.567732	-0.74134	0.656587	MIF
							keratan sulfate metabolic process (GO:0042339)	0.344857	10:33:25.131000	0.398509	0.514097	-0.614426	0.654133	HEXA
							positive regulation of release of cytochrome c from mitochondria (GO:0090200)	0.27832	09:26:57.944000	0.326501	0.468123	-0.509908	0.652164	FAM162A
							carboxylic acid biosynthetic process (GO:0046394)	0.419502	11:54:43.115000	0.477836	0.570515	-0.750621	0.652056	ATPIF1
							purine ribonucleoside monophosphate metabolic process (GO:0009167)	0.383303	0.471565	0.439567	0.545925	-0.67686	0.649061	PAICS
							nucleic acid-templated transcription (GO:0097659)	0.236074	08:48:25.471000	0.303663	0.457832	-0.44901	0.648197	PTMA;BPTF
							positive regulation of interleukin-6 production (GO:0032755)	0.412435	11:50:05.814000	0.470396	0.567732	-0.7317	0.648049	HSPD1
							mitotic nuclear envelope disassembly (GO:0007077)	0.419502	11:54:43.115000	0.477836	0.570515	-0.745084	0.647246	BANF1
							interstrand cross-link repair (GO:0036297)	0.446931	12:21:49.195000	0.506569	0.590303	-0.801391	0.645402	UBB
							positive regulation of phosphate metabolic process (GO:0045937)	0.29556	09:48:22.090000	0.34527	0.48162	-0.528397	0.644055	MIF
							positive regulation of neuron death (GO:1901216)	0.375798	11:10:07.538000	0.431585	0.539561	-0.654992	0.641043	DDIT3
							regulation of cytokine-mediated signaling pathway (GO:0001959)	0.298307	09:52:52.370000	0.375119	0.501437	-0.5276	0.638201	HSP90AB1;UBB
							positive regulation of transport (GO:0051050)	0.419502	11:54:43.115000	0.477836	0.570515	-0.728211	0.632588	SGK1
							positive regulation of protein localization to membrane (GO:1905477)	0.320413	10:11:55.989000	0.399955	0.515572	-0.5557	0.632466	DYNLL1;SQSTM1
							positive regulation of macromolecule biosynthetic process (GO:0010557)	0.246263	0.371912	0.335536	0.47486	-0.45055	0.63138	FXR1;PLA2G1B;CALR
							regulation of release of sequestered calcium ion into cytosol by sarcoplasmic reticulum (GO:0010880)	0.251669	0.37409	0.29734	0.451861	-0.456009	0.629128	CALM1
							regulation of cell morphogenesis (GO:0022604)	0.29556	09:48:22.090000	0.34527	0.48162	-0.512867	0.625126	CFL1
							anatomical structure homeostasis (GO:0060249)	0.352733	10:40:40.168000	0.406953	0.519079	-0.598336	0.623493	PARP1
							regulation of T cell activation (GO:0050863)	0.419502	11:54:43.115000	0.477836	0.570515	-0.715205	0.62129	HSPD1
							negative regulation of type I interferon production (GO:0032480)	0.419502	11:54:43.115000	0.477836	0.570515	-0.709935	0.616712	UBB
							negative regulation of cell-substrate adhesion (GO:0010812)	0.352733	10:40:40.168000	0.406953	0.519079	-0.591693	0.616571	RCC2
							regulation of response to DNA damage stimulus (GO:2001020)	0.360514	10:49:29.911000	0.41528	0.524656	-0.599734	0.611863	FEM1B
							determination of left/right symmetry (GO:0007368)	0.405283	11:43:43.561000	0.462851	0.563716	-0.67696	0.611409	TDGF1
							aminoglycan catabolic process (GO:0006026)	0.328819	10:18:49.615000	0.381259	0.502919	-0.547188	0.608608	SDC4
							positive regulation of peptide secretion (GO:0002793)	0.352733	10:40:40.168000	0.406953	0.519079	-0.580968	0.605394	PLA2G1B
							positive regulation of calcium ion transport into cytosol (GO:0010524)	0.328819	10:18:49.615000	0.381259	0.502919	-0.543769	0.604806	PLA2G1B
							positive regulation of protein insertion into mitochondrial membrane involved in apoptotic signaling pathway (GO:1900740)	0.312389	10:04:10.415000	0.363517	0.492517	-0.518752	0.60357	DYNLL1
							nuclear-transcribed mRNA catabolic process, exonucleolytic (GO:0000291)	0.352733	10:40:40.168000	0.406953	0.519079	-0.577707	0.601996	CNOT8
							regulation of cholesterol metabolic process (GO:0090181)	0.398045	11:34:52.655000	0.455199	0.55639	-0.645107	0.594267	SP1
							actin polymerization or depolymerization (GO:0008154)	0.360514	10:49:29.911000	0.41528	0.524656	-0.579443	0.591162	CFL1
							sister chromatid segregation (GO:0000819)	0.328819	10:18:49.615000	0.381259	0.502919	-0.525733	0.584746	SMC4
							metal ion transport (GO:0030001)	0.34671	10:35:51.993000	0.429137	0.537687	-0.547867	0.580337	SGK1;ATOX1
							mitotic spindle assembly (GO:0090307)	0.433381	0.506406	0.492405	0.582182	-0.693351	0.579737	CDC14A
							protein phosphorylation (GO:0006468)	0.206506	08:16:17.749000	0.356814	0.491668	-0.363878	0.573991	CCNE1;WNK1;PLK2;TLK2;GTF2H1;SGK1;TDGF1;MAP4K4
							glycosaminoglycan biosynthetic process (GO:0006024)	0.337978	10:25:57.122000	0.41949	0.529505	-0.522392	0.566678	SDC4;HEXA
							embryonic limb morphogenesis (GO:0030326)	0.344857	10:33:25.131000	0.398509	0.514097	-0.523668	0.55751	TBX3
							amide biosynthetic process (GO:0043604)	0.419502	11:54:43.115000	0.477836	0.570515	-0.63417	0.550896	ATPIF1
							regulation of cellular localization (GO:0060341)	0.390718	11:26:43.261000	0.447438	0.551667	-0.584094	0.548913	PARP1
							glycoprotein metabolic process (GO:0009100)	0.446931	12:21:49.195000	0.506569	0.590303	-0.680383	0.547948	PARK7
							organic hydroxy compound biosynthetic process (GO:1901617)	0.453584	12:28:17.634000	0.513503	0.593095	-0.692357	0.54736	PARK7
							chondroitin sulfate metabolic process (GO:0030204)	0.312389	10:04:10.415000	0.363517	0.492517	-0.469325	0.546062	HEXA
							regulation of microtubule polymerization (GO:0031113)	0.352733	10:40:40.168000	0.406953	0.519079	-0.522821	0.544803	STMN2
							positive regulation of organelle assembly (GO:1902117)	0.440197	12:14:37.814000	0.499537	0.58532	-0.658424	0.540259	SDC4
							acylglycerol catabolic process (GO:0046464)	0.312389	10:04:10.415000	0.363517	0.492517	-0.462314	0.537905	FABP3
							regulation of glucose import (GO:0046324)	0.320654	10:11:55.989000	0.372451	0.498655	-0.472455	0.537368	PLA2G1B
							regulation of activated T cell proliferation (GO:0046006)	0.304025	09:58:24.230000	0.354458	0.488818	-0.450871	0.536827	IGFBP2
							positive regulation of exocytosis (GO:0045921)	0.344857	10:33:25.131000	0.398509	0.514097	-0.504198	0.536782	SDC4
							protein N-linked glycosylation via asparagine (GO:0018279)	0.419502	11:54:43.115000	0.477836	0.570515	-0.617543	0.536452	VCP
							positive regulation of tumor necrosis factor production (GO:0032760)	0.440197	12:14:37.814000	0.499537	0.58532	-0.649659	0.533067	MIF
							negative regulation of TOR signaling (GO:0032007)	0.390718	0.47689	0.447438	0.551667	-0.566721	0.532587	FNIP1
							mitochondrial gene expression (GO:0140053)	0.426483	12:03:34.982000	0.485172	0.577246	-0.62328	0.531148	MRPS12
							signal transduction by p53 class mediator (GO:0072331)	0.383303	0.471565	0.439567	0.545925	-0.551823	0.52916	HINT1
							regulation of interleukin-12 production (GO:0032655)	0.336886	0.433614	0.389945	0.507454	-0.479019	0.521178	HSPD1
							positive regulation of mitochondrial outer membrane permeabilization involved in apoptotic signaling pathway (GO:1901030)	0.368202	10:58:47.670000	0.42349	0.531395	-0.519805	0.519349	DYNLL1
							regulation of telomere maintenance via telomerase (GO:0032210)	0.466652	12:44:11.074000	0.527082	0.602633	-0.679506	0.5179	CCT3
							pattern recognition receptor signaling pathway (GO:0002221)	0.446931	12:21:49.195000	0.506569	0.590303	-0.640819	0.516085	HSP90B1
							regulation of cysteine-type endopeptidase activity involved in apoptotic process (GO:0043281)	0.311588	10:04:10.415000	0.390073	0.507454	-0.442424	0.515899	GPX1;FNIP1
							fatty acid metabolic process (GO:0006631)	0.368367	10:58:47.670000	0.452878	0.55639	-0.515525	0.514843	GPX1;PLA2G1B
							MAPK cascade (GO:0000165)	0.244604	08:53:10.626000	0.36662	0.495535	-0.362976	0.511113	UBB;PSMB3;CALM1;PSMA7;MAP4K4
							protein import into nucleus (GO:0006606)	0.355404	10:44:33.818000	0.438699	0.545925	-0.491839	0.508808	PDIA3;RANBP1
							regulation of organelle assembly (GO:1902115)	0.440197	12:14:37.814000	0.499537	0.58532	-0.61443	0.50416	PLK2
							protein destabilization (GO:0031648)	0.320654	10:11:55.989000	0.372451	0.498655	-0.432248	0.491637	MDM2
							membrane depolarization (GO:0051899)	0.412435	11:50:05.814000	0.470396	0.567732	-0.55033	0.487414	ATPIF1
							ATP-dependent chromatin remodeling (GO:0043044)	0.312389	10:04:10.415000	0.363517	0.492517	-0.418203	0.486582	ANP32B
							transport of virus (GO:0046794)	0.485673	13:06:23.087000	0.546746	0.618868	-0.666384	0.481276	UBB
							intraciliary transport involved in cilium assembly (GO:0035735)	0.390718	11:26:43.261000	0.447438	0.551667	-0.512022	0.481182	DYNLL1
							cellular protein complex assembly (GO:0043623)	0.252683	09:00:23.332000	0.343203	0.48162	-0.348672	0.47964	HSP90AA1;HSP90AB1;HSPD1
							positive regulation of release of sequestered calcium ion into cytosol (GO:0051281)	0.320654	10:11:55.989000	0.372451	0.498655	-0.420124	0.477846	CALM1
							polyol metabolic process (GO:0019751)	0.440197	12:14:37.814000	0.499537	0.58532	-0.57856	0.474727	CALM1
							negative regulation of sequence-specific DNA binding transcription factor activity (GO:0043433)	0.23987	08:49:52.508000	0.327864	0.469681	-0.332158	0.474208	DDIT3;TMSB4X;TAF3
							positive regulation of cell-substrate adhesion (GO:0010811)	0.473069	12:51:35.640000	0.533729	0.607371	-0.633311	0.474042	CALR
							positive regulation of calcium ion transport (GO:0051928)	0.336886	10:24:24.208000	0.389945	0.507454	-0.431699	0.469693	PLA2G1B
							regulation of intracellular transport (GO:0032386)	0.390718	11:26:43.261000	0.447438	0.551667	-0.498601	0.46857	LAMP1
							protein autoubiquitination (GO:0051865)	0.453584	12:28:17.634000	0.513503	0.593095	-0.589358	0.465932	MDM2
							positive regulation of mitotic cell cycle (GO:0045931)	0.473069	12:51:35.640000	0.533729	0.607371	-0.620818	0.464692	MDM2
							negative regulation of I-kappaB kinase/NF-kappaB signaling (GO:0043124)	0.440197	0.51016	0.499537	0.58532	-0.564229	0.462969	TMSB4X
							regulation of calcium-mediated signaling (GO:0050848)	0.398045	0.482554	0.455199	0.55639	-0.498459	0.459176	CALM1
							telomere maintenance (GO:0000723)	0.466652	0.530684	0.527082	0.602633	-0.595519	0.453888	PARP1
							negative regulation of protein ubiquitination (GO:0031397)	0.460157	12:37:05.776000	0.52034	0.598145	-0.583579	0.452967	PARK7
							positive regulation of protein localization to cell periphery (GO:1904377)	0.433381	12:09:13.516000	0.492405	0.582182	-0.536118	0.448268	SQSTM1
							response to tumor necrosis factor (GO:0034612)	0.329211	10:19:05.327000	0.409762	0.52227	-0.402177	0.446842	TDGF1;YBX3
							T cell receptor signaling pathway (GO:0050852)	0.314556	10:07:24.224000	0.41534	0.524656	-0.378909	0.438244	UBB;PSMB3;PSMA7
							Ras protein signal transduction (GO:0007265)	0.282438	09:34:52.545000	0.396548	0.514097	-0.346395	0.437947	CDKN1A;PLK2;CFL1;PARK7
							regulation of interleukin-6 production (GO:0032675)	0.405283	11:43:43.561000	0.462851	0.563716	-0.46407	0.419133	HSPD1
							regulation of metal ion transport (GO:0010959)	0.368202	0.457496	0.42349	0.531395	-0.418325	0.417958	WNK1
							regulation of reactive oxygen species metabolic process (GO:2000377)	0.453584	12:28:17.634000	0.513503	0.593095	-0.528463	0.41779	CDKN1A
							positive regulation of actin filament polymerization (GO:0030838)	0.466652	12:44:11.074000	0.527082	0.602633	-0.547271	0.417115	PFN1
							positive regulation of establishment of protein localization to mitochondrion (GO:1903749)	0.385489	0.473912	0.471463	0.568499	-0.437529	0.41707	TOMM7;DYNLL1
							liver development (GO:0001889)	0.320654	10:11:55.989000	0.372451	0.498655	-0.366358	0.416694	ARID5B
							intraciliary transport (GO:0042073)	0.433381	12:09:13.516000	0.492405	0.582182	-0.498345	0.416685	DYNLL1
							phosphatidic acid metabolic process (GO:0046473)	0.398045	11:34:52.655000	0.455199	0.55639	-0.452267	0.416625	PLA2G1B
							actin filament bundle assembly (GO:0051017)	0.368202	10:58:47.670000	0.42349	0.531395	-0.416624	0.416259	HSP90B1
							positive regulation of chemotaxis (GO:0050921)	0.446931	12:21:49.195000	0.506569	0.590303	-0.516578	0.416027	TMSB4X
							base-excision repair (GO:0006284)	0.368202	10:58:47.670000	0.42349	0.531395	-0.416169	0.415805	LIG1
							peptide transport (GO:0015833)	0.398045	11:34:52.655000	0.455199	0.55639	-0.451325	0.415757	HSP90B1
							protein maturation (GO:0051604)	0.267194	09:15:05.689000	0.339683	0.479735	-0.307986	0.406473	GCSH;HSPD1
							regulation of protein polymerization (GO:0032271)	0.312389	10:04:10.415000	0.363517	0.492517	-0.348079	0.404992	PFN1
							autophagosome assembly (GO:0000045)	0.509987	13:34:26.078000	0.571704	0.639029	-0.593903	0.399916	ATG14
							icosanoid metabolic process (GO:0006690)	0.433381	12:09:13.516000	0.492405	0.582182	-0.477501	0.399256	GPX1
							protein polymerization (GO:0051258)	0.426483	0.502488	0.485172	0.577246	-0.459983	0.39199	UBE2C
							mismatch repair (GO:0006298)	0.328819	0.429741	0.381259	0.502919	-0.351867	0.391364	LIG1
							nucleotide-binding oligomerization domain containing signaling pathway (GO:0070423)	0.29556	09:48:22.090000	0.34527	0.48162	-0.32034	0.390458	UBB
							peptidyl-asparagine modification (GO:0018196)	0.426483	12:03:34.982000	0.485172	0.577246	-0.453326	0.386317	VCP
							regulation of stress-activated MAPK cascade (GO:0032872)	0.398045	11:34:52.655000	0.455199	0.55639	-0.417895	0.384962	MAP4K4
							cellular response to fibroblast growth factor stimulus (GO:0044344)	0.316004	10:09:43.069000	0.395023	0.5135	-0.334148	0.384939	UBB;TDGF1
							negative regulation of ERBB signaling pathway (GO:1901185)	0.412435	0.493123	0.470396	0.567732	-0.434469	0.384799	UBB
							negative regulation of protein kinase activity (GO:0006469)	0.381227	11:18:49.028000	0.466852	0.567732	-0.397034	0.382884	CDKN1A;PARK7
							protein complex disassembly (GO:0043241)	0.433381	12:09:13.516000	0.492405	0.582182	-0.457872	0.382844	VCP
							sulfur compound catabolic process (GO:0044273)	0.352733	10:40:40.168000	0.406953	0.519079	-0.365447	0.380812	HEXA
							regulation of viral transcription (GO:0046782)	0.390718	11:26:43.261000	0.447438	0.551667	-0.404998	0.380605	IFITM3
							positive regulation of response to stimulus (GO:0048584)	0.485673	13:06:23.087000	0.546746	0.618868	-0.525916	0.379827	PLA2G1B
							neuron differentiation (GO:0030182)	0.236684	08:48:49.341000	0.324028	0.468123	-0.26253	0.378314	FXR1;WNK1;MANF
							fatty acid biosynthetic process (GO:0006633)	0.440197	12:14:37.814000	0.499537	0.58532	-0.459177	0.37677	PLA2G1B
							response to organonitrogen compound (GO:0010243)	0.466652	12:44:11.074000	0.527082	0.602633	-0.486676	0.370931	VCP
							sodium ion transport (GO:0006814)	0.509987	13:34:26.078000	0.571704	0.639029	-0.550103	0.370423	SGK1
							positive regulation of protein transport (GO:0051222)	0.497976	13:20:28.747000	0.559401	0.629418	-0.525721	0.366534	PLA2G1B
							positive regulation of peptidyl-tyrosine phosphorylation (GO:0050731)	0.410787	11:50:05.814000	0.498621	0.58532	-0.410577	0.365282	MIF;TDGF1
							regulation of type I interferon-mediated signaling pathway (GO:0060338)	0.383303	11:19:03.256000	0.439567	0.545925	-0.36916	0.353999	HSP90AB1
							intracellular transport of virus (GO:0075733)	0.485673	13:06:23.087000	0.546746	0.618868	-0.487805	0.352303	UBB
							positive regulation of protein metabolic process (GO:0051247)	0.324816	10:18:25.741000	0.404868	0.519079	-0.311526	0.35031	VCP;PLK2
							negative regulation of cell growth (GO:0030308)	0.406605	11:45:31.200000	0.494156	0.583846	-0.387416	0.348641	CDKN1A;JADE1
							regulation of focal adhesion assembly (GO:0051893)	0.419502	11:54:43.115000	0.477836	0.570515	-0.399683	0.347199	RCC2
							positive regulation of epidermal growth factor receptor signaling pathway (GO:0045742)	0.304025	09:58:24.230000	0.354458	0.488818	-0.29143	0.346989	UBB
							hexose metabolic process (GO:0019318)	0.426483	12:03:34.982000	0.485172	0.577246	-0.407153	0.346968	ALDOA
							negative regulation of protein phosphorylation (GO:0001933)	0.363715	0.454711	0.470492	0.567732	-0.337153	0.340992	PARK7;ATG14;CALM1
							positive regulation of interferon-gamma production (GO:0032729)	0.412435	11:50:05.814000	0.470396	0.567732	-0.384743	0.340758	HSPD1
							macromolecular complex assembly (GO:0065003)	0.427366	12:03:34.982000	0.516227	0.594623	-0.398197	0.338513	MDM2;ELOB
							regulation of insulin secretion (GO:0050796)	0.333598	10:24:24.208000	0.414636	0.524656	-0.30584	0.335757	TRH;SLC25A5
							myeloid leukocyte differentiation (GO:0002573)	0.460157	12:37:05.776000	0.52034	0.598145	-0.429927	0.333704	PARP1
							regulation of epidermal growth factor receptor signaling pathway (GO:0042058)	0.509987	0.56558	0.571704	0.639029	-0.491231	0.33078	UBB
							regulation of cardiac muscle contraction (GO:0055117)	0.352733	10:40:40.168000	0.406953	0.519079	-0.315547	0.328814	CALM1
							positive regulation of immune response (GO:0050778)	0.485673	13:06:23.087000	0.546746	0.618868	-0.452987	0.327156	PLA2G1B
							intracellular protein transport (GO:0006886)	0.240927	08:49:52.508000	0.376421	0.502782	-0.228691	0.325487	PDIA3;RANBP1;VPS26A;VPS35;CALR;SNX6
							positive regulation of cell morphogenesis involved in differentiation (GO:0010770)	0.509987	13:34:26.078000	0.571704	0.639029	-0.479245	0.322709	CALR
							phosphorylation (GO:0016310)	0.184922	0.333001	0.315139	0.462182	-0.190858	0.322134	CCNE1;WNK1;PLK2;TLK2;CHCHD10;SGK1;MAP4K4
							cellular response to retinoic acid (GO:0071300)	0.405283	11:43:43.561000	0.462851	0.563716	-0.354489	0.320164	SNW1
							anterior/posterior pattern specification (GO:0009952)	0.344857	10:33:25.131000	0.398509	0.514097	-0.297213	0.31642	TDGF1
							stress-activated MAPK cascade (GO:0051403)	0.533156	14:02:38.113000	0.595294	0.65633	-0.490915	0.308756	UBB
							sterol homeostasis (GO:0055092)	0.509987	0.56558	0.571704	0.639029	-0.453318	0.305251	FABP3
							sprouting angiogenesis (GO:0002040)	0.419502	11:54:43.115000	0.477836	0.570515	-0.345857	0.300442	TDGF1
							recombinational repair (GO:0000725)	0.581376	14:57:57.687000	0.64375	0.692235	-0.540277	0.293023	PARP1
							actin filament organization (GO:0007015)	0.427366	12:03:34.982000	0.516227	0.594623	-0.340158	0.289173	PLA2G1B;ALDOA
							myeloid cell differentiation (GO:0030099)	0.419502	0.496332	0.477836	0.570515	-0.332805	0.289104	ATPIF1
							RNA modification (GO:0009451)	0.485673	13:06:23.087000	0.546746	0.618868	-0.399114	0.288248	NOP10
							regulation of tumor necrosis factor production (GO:0032680)	0.527468	0.581173	0.589521	0.652505	-0.446765	0.28578	MIF
							protein ubiquitination (GO:0016567)	0.2652	09:15:05.689000	0.433642	0.541733	-0.211694	0.280976	VCP;UBB;PSMB3;UBE2C;MDM2;RLIM;ELOB;PSMA7
							positive regulation of NF-kappaB transcription factor activity (GO:0051092)	0.459773	12:37:05.776000	0.550194	0.621943	-0.36132	0.280753	UBB;PLA2G1B
							regulation of stress fiber assembly (GO:0051492)	0.521711	13:50:59.310000	0.583665	0.649409	-0.429737	0.279604	PFN1
							regulation of macromolecule metabolic process (GO:0060255)	0.463749	12:42:29.613000	0.554321	0.626191	-0.357434	0.274656	EIF4A2;CRIP1
							protein targeting to membrane (GO:0006612)	0.527468	13:56:53.356000	0.589521	0.652505	-0.416269	0.266273	SEC62
							telomere organization (GO:0032200)	0.398045	0.482554	0.455199	0.55639	-0.288196	0.265484	PARP1
							mitotic cytokinesis (GO:0000281)	0.515885	13:43:18.926000	0.577727	0.64449	-0.400219	0.264894	SON
							negative regulation of peptidase activity (GO:0010466)	0.533156	0.585163	0.595294	0.65633	-0.420816	0.264668	PARK7
							cellular response to amino acid starvation (GO:0034198)	0.383303	11:19:03.256000	0.439567	0.545925	-0.275415	0.264104	CDKN1A
							negative regulation of neuron projection development (GO:0010977)	0.466652	12:44:11.074000	0.527082	0.602633	-0.343251	0.261616	STMN2
							Fc-gamma receptor signaling pathway involved in phagocytosis (GO:0038096)	0.479481	12:59:58.361000	0.570562	0.639029	-0.349794	0.257117	HSP90AA1;HSP90AB1
							non-recombinational repair (GO:0000726)	0.453584	12:28:17.634000	0.513503	0.593095	-0.322697	0.255116	H2AFX
							regulation of TOR signaling (GO:0032006)	0.56059	14:34:08.059000	0.622971	0.676375	-0.43345	0.250866	FNIP1
							neutrophil migration (GO:1990266)	0.509987	13:34:26.078000	0.571704	0.639029	-0.360875	0.243003	PLA2G1B
							fibroblast growth factor receptor signaling pathway (GO:0008543)	0.615422	0.650655	0.677408	0.718874	-0.499852	0.242652	UBB
							regulation of cytokine secretion (GO:0050707)	0.320654	10:11:55.989000	0.372451	0.498655	-0.213197	0.242489	MIF
							positive regulation of leukocyte chemotaxis (GO:0002690)	0.527468	13:56:53.356000	0.589521	0.652505	-0.373068	0.238639	CALR
							cholesterol homeostasis (GO:0042632)	0.509987	13:34:26.078000	0.571704	0.639029	-0.346035	0.233009	FABP3
							cellular protein catabolic process (GO:0044257)	0.533156	0.585163	0.595294	0.65633	-0.369278	0.232254	MDM2
							positive regulation of cell projection organization (GO:0031346)	0.538776	0.589807	0.600987	0.660731	-0.370388	0.229068	STMN2
							response to glucose (GO:0009749)	0.440197	12:14:37.814000	0.499537	0.58532	-0.277415	0.227628	TRA2B
							plasma membrane bounded cell projection organization (GO:0120036)	0.419106	0.496332	0.507475	0.590547	-0.259636	0.225787	STMN2;MANF
							striated muscle contraction (GO:0006941)	0.527468	13:56:53.356000	0.589521	0.652505	-0.345483	0.220994	ALDOA
							negative regulation of dephosphorylation (GO:0035305)	0.538776	14:09:19.351000	0.600987	0.660731	-0.355444	0.219826	WNK1
							protein tetramerization (GO:0051262)	0.298307	09:52:52.370000	0.375119	0.501437	-0.176615	0.213639	ATPIF1;ALDOA
							nuclear envelope disassembly (GO:0051081)	0.433381	12:09:13.516000	0.492405	0.582182	-0.253944	0.212332	BANF1
							negative regulation of mitotic cell cycle (GO:0045930)	0.446931	12:21:49.195000	0.506569	0.590303	-0.262339	0.211275	CDC14A
							histone H4 acetylation (GO:0043967)	0.440197	12:14:37.814000	0.499537	0.58532	-0.249729	0.204911	JADE1
							histone acetylation (GO:0016573)	0.581376	0.623584	0.64375	0.692235	-0.372806	0.202194	JADE1
							glucose homeostasis (GO:0042593)	0.59632	15:14:07.101000	0.658583	0.703731	-0.383459	0.19824	PARK7
							protein polyubiquitination (GO:0000209)	0.255823	09:06:08.896000	0.380533	0.502919	-0.144931	0.19758	UBB;PSMB3;UBE2C;RLIM;PSMA7
							positive regulation of protein modification by small protein conjugation or removal (GO:1903322)	0.549815	14:22:49.897000	0.612134	0.669682	-0.325762	0.194862	UBB
							snRNA transcription (GO:0009301)	0.576273	14:52:19.995000	0.638665	0.688947	-0.35193	0.193974	SP1
							positive regulation of proteolysis (GO:0045862)	0.473069	12:51:35.640000	0.533729	0.607371	-0.259085	0.193929	ATPIF1
							diterpenoid metabolic process (GO:0016101)	0.533156	14:02:38.113000	0.595294	0.65633	-0.305766	0.192309	SDC4
							cellular glucose homeostasis (GO:0001678)	0.336886	10:24:24.208000	0.389945	0.507454	-0.174541	0.189902	TRA2B
							negative regulation of protein modification by small protein conjugation or removal (GO:1903321)	0.433381	12:09:13.516000	0.492405	0.582182	-0.226928	0.189743	PARK7
							retinoid metabolic process (GO:0001523)	0.601182	15:19:50.583000	0.66339	0.707532	-0.368069	0.187295	SDC4
							positive regulation of protein binding (GO:0032092)	0.521711	13:50:59.310000	0.583665	0.649409	-0.286789	0.186596	PARK7
							histone H3 acetylation (GO:0043966)	0.412435	0.493123	0.470396	0.567732	-0.210519	0.186452	JADE1
							peptidyl-threonine phosphorylation (GO:0018107)	0.565881	14:40:08.441000	0.628277	0.680333	-0.327251	0.186328	WNK1
							regulation of inflammatory response (GO:0050727)	0.324399	10:18:25.741000	0.426531	0.534817	-0.164885	0.185624	TMSB4X;VPS35;PARK7
							regulation of endothelial cell proliferation (GO:0001936)	0.620056	15:42:49.429000	0.681951	0.721891	-0.385777	0.184381	ATPIF1
							positive regulation of binding (GO:0051099)	0.629156	15:53:41.862000	0.690846	0.728583	-0.395482	0.183257	NME1
							positive regulation of transferase activity (GO:0051347)	0.494928	13:18:43.681000	0.586373	0.651568	-0.256486	0.180397	HSP90AA1;HSP90AB1
							regulation of DNA binding (GO:0051101)	0.473069	12:51:35.640000	0.533729	0.607371	-0.239277	0.179102	NME1
							JNK cascade (GO:0007254)	0.555235	14:28:33.112000	0.617591	0.673051	-0.302608	0.178044	UBB
							plasma membrane bounded cell projection assembly (GO:0120031)	0.330987	10:21:57.063000	0.452965	0.55639	-0.158642	0.175407	ATP6V0D1;DYNLL1;ATP6V1D;CDC14A
							carbohydrate homeostasis (GO:0033500)	0.538776	0.589807	0.600987	0.660731	-0.271265	0.167765	PARK7
							protein homooligomerization (GO:0051260)	0.402663	11:41:10.002000	0.512892	0.593095	-0.183135	0.166589	ATPIF1;MIF;ALDOA
							granulocyte chemotaxis (GO:0071621)	0.497976	13:20:28.747000	0.559401	0.629418	-0.238579	0.166338	PLA2G1B
							cellular response to growth factor stimulus (GO:0071363)	0.502543	13:26:45.540000	0.594116	0.65633	-0.240643	0.16558	STMN2;TDGF1
							negative regulation of cellular catabolic process (GO:0031330)	0.497976	13:20:28.747000	0.559401	0.629418	-0.233928	0.163095	TLK2
							regulation of multicellular organismal development (GO:2000026)	0.412435	11:50:05.814000	0.470396	0.567732	-0.183801	0.162788	GPX1
							Rho protein signal transduction (GO:0007266)	0.586418	15:04:36.378000	0.648765	0.696305	-0.298623	0.159382	CFL1
							brain development (GO:0007420)	0.423244	12:00:35.562000	0.511863	0.593095	-0.185194	0.159231	BPTF;PAFAH1B1
							regulation of G-protein coupled receptor protein signaling pathway (GO:0008277)	0.59632	15:14:07.101000	0.658583	0.703731	-0.306756	0.158586	CALM1
							tRNA aminoacylation for protein translation (GO:0006418)	0.433381	12:09:13.516000	0.492405	0.582182	-0.186095	0.155601	PPA1
							regulation of tumor necrosis factor-mediated signaling pathway (GO:0010803)	0.497976	13:20:28.747000	0.559401	0.629418	-0.215576	0.1503	UBB
							positive regulation of T cell proliferation (GO:0042102)	0.527468	0.581173	0.589521	0.652505	-0.23411	0.149752	IGFBP2
							extracellular matrix disassembly (GO:0022617)	0.615422	15:36:56.604000	0.677408	0.718874	-0.306351	0.148717	SPP1
							cellular metal ion homeostasis (GO:0006875)	0.324816	10:18:25.741000	0.404868	0.519079	-0.132156	0.14861	CALR;ATOX1
							glycolipid metabolic process (GO:0006664)	0.549815	0.599189	0.612134	0.669682	-0.247414	0.147997	HEXA
							vascular endothelial growth factor receptor signaling pathway (GO:0048010)	0.576273	14:52:19.995000	0.638665	0.688947	-0.267504	0.147441	HSP90AA1
							lymphocyte differentiation (GO:0030098)	0.591399	15:09:25.393000	0.653709	0.700284	-0.275992	0.144969	KLF6
							regulation of innate immune response (GO:0045088)	0.571108	0.616072	0.633507	0.685124	-0.245961	0.137782	HSP90AB1
							regulation of epithelial cell migration (GO:0010632)	0.446931	12:21:49.195000	0.506569	0.590303	-0.168756	0.135908	PFN1
							cellular response to reactive oxygen species (GO:0034614)	0.549815	0.599189	0.612134	0.669682	-0.225357	0.134803	PARK7
							calcium ion homeostasis (GO:0055074)	0.655175	16:23:23.386000	0.716073	0.750067	-0.312831	0.132282	CALR
							double-strand break repair via homologous recombination (GO:0000724)	0.605987	0.642679	0.668129	0.711247	-0.263595	0.132034	PARP1
							regulation of cell motility (GO:2000145)	0.381227	11:18:49.028000	0.466852	0.567732	-0.136542	0.131676	RCC2;SGK1
							regulation of interferon-gamma production (GO:0032649)	0.412435	11:50:05.814000	0.470396	0.567732	-0.145476	0.128845	HSPD1
							regulation of neuron differentiation (GO:0045664)	0.642401	16:07:11.006000	0.703727	0.7385	-0.286091	0.126607	CALR
							positive regulation of endothelial cell proliferation (GO:0001938)	0.56059	0.607038	0.622971	0.676375	-0.217649	0.125968	SP1
							protein heterooligomerization (GO:0051291)	0.453584	12:28:17.634000	0.513503	0.593095	-0.154438	0.122095	MAT2A
							monovalent inorganic cation transport (GO:0015672)	0.719435	17:41:36.259000	0.776962	0.796175	-0.356738	0.11747	SGK1
							regulation of steroid biosynthetic process (GO:0050810)	0.419502	11:54:43.115000	0.477836	0.570515	-0.135127	0.117383	SP1
							neuron projection morphogenesis (GO:0048812)	0.314556	10:07:24.224000	0.41534	0.524656	-0.101482	0.117373	UBB;SGK1;MAP4K4
							regulation of protein secretion (GO:0050708)	0.372665	11:05:59.729000	0.457559	0.558873	-0.117008	0.115496	PLA2G1B;SLC25A5
							mitotic spindle organization (GO:0007052)	0.59632	15:14:07.101000	0.658583	0.703731	-0.215044	0.111173	PLK2
							positive regulation of lymphocyte proliferation (GO:0050671)	0.581376	14:57:57.687000	0.64375	0.692235	-0.204676	0.111008	MIF
							positive regulation of protein ubiquitination (GO:0031398)	0.638039	16:03:15.784000	0.699494	0.735421	-0.226336	0.101705	UBB
							cytoskeleton-dependent cytokinesis (GO:0061640)	0.576273	14:52:19.995000	0.638665	0.688947	-0.183349	0.101057	SON
							regulation of actin filament polymerization (GO:0030833)	0.565881	14:40:08.441000	0.628277	0.680333	-0.17725	0.100921	PFN1
							negative regulation of phosphatase activity (GO:0010923)	0.565881	14:40:08.441000	0.628277	0.680333	-0.176913	0.100729	WNK1
							lipid biosynthetic process (GO:0008610)	0.586418	15:04:36.378000	0.648765	0.696305	-0.188602	0.100661	PLA2G1B
							mitotic DNA damage checkpoint (GO:0044773)	0.383303	11:19:03.256000	0.439567	0.545925	-0.103525	0.0992732	CCND1
							positive regulation of protein polymerization (GO:0032273)	0.544329	14:17:31.370000	0.6066	0.666201	-0.162804	0.0990175	PFN1
							sulfur compound biosynthetic process (GO:0044272)	0.435565	0.508608	0.524875	0.602633	-0.117884	0.0979748	GSTA4;MAT2A
							regulation of kinase activity (GO:0043549)	0.709032	17:28:47.065000	0.767251	0.788126	-0.281225	0.0967006	SOD1
							triglyceride metabolic process (GO:0006641)	0.473069	12:51:35.640000	0.533729	0.607371	-0.126722	0.0948531	FABP3
							muscle contraction (GO:0006936)	0.494928	13:18:43.681000	0.586373	0.651568	-0.132336	0.0930772	ALDOA;CALM1
							transforming growth factor beta receptor signaling pathway (GO:0007179)	0.605987	15:25:27.433000	0.668129	0.711247	-0.182316	0.0913218	UBB
							protein modification process (GO:0036211)	0.642401	0.671655	0.703727	0.7385	-0.192942	0.0853849	PARP1
							cellular response to acid chemical (GO:0071229)	0.671503	16:42:21.754000	0.731742	0.761317	-0.211654	0.0842885	SNW1
							double-strand break repair via nonhomologous end joining (GO:0006303)	0.460157	0.525761	0.52034	0.598145	-0.108062	0.0838762	H2AFX
							cellular response to type I interferon (GO:0071357)	0.549815	0.599189	0.612134	0.669682	-0.134156	0.0802487	IFITM3
							negative regulation of kinase activity (GO:0033673)	0.671503	16:42:21.754000	0.731742	0.761317	-0.198386	0.0790045	PARK7
							heart development (GO:0007507)	0.268834	09:15:05.689000	0.362337	0.492517	-0.0592056	0.0777761	CACYBP;CRIP1;TDGF1
							sphingolipid metabolic process (GO:0006665)	0.75747	18:31:01.706000	0.811934	0.828017	-0.277322	0.0770322	HEXA
							cellular response to organic cyclic compound (GO:0071407)	0.487241	13:07:31.516000	0.578522	0.64453	-0.103484	0.074405	SPP1;HSP90B1
							regulation of gene expression, epigenetic (GO:0040029)	0.59632	15:14:07.101000	0.658583	0.703731	-0.14174	0.0732766	GPX1
							positive regulation of cell cycle process (GO:0090068)	0.729467	17:55:02.913000	0.786269	0.804741	-0.223937	0.0706392	RCC2
							cellular calcium ion homeostasis (GO:0006874)	0.777238	18:57:17.761000	0.829755	0.844164	-0.275571	0.0694464	CALR
							regulation of mitotic nuclear division (GO:0007088)	0.642401	16:07:11.006000	0.703727	0.7385	-0.154767	0.0684909	CDC14A
							intracellular steroid hormone receptor signaling pathway (GO:0030518)	0.555235	14:28:33.112000	0.617591	0.673051	-0.115773	0.0681169	CCNE1
							positive regulation of actin filament bundle assembly (GO:0032233)	0.419502	0.496332	0.477836	0.570515	-0.0773752	0.0672149	PFN1
							mitotic sister chromatid segregation (GO:0000070)	0.633625	0.665345	0.6952	0.731359	-0.144937	0.0661345	SMC4
							lipid homeostasis (GO:0055088)	0.453584	12:28:17.634000	0.513503	0.593095	-0.0783984	0.0619799	FABP3
							regulation of cell cycle process (GO:0010564)	0.667495	0.692775	0.727908	0.758256	-0.153067	0.0618735	CALM1
							positive regulation of kinase activity (GO:0033674)	0.398199	11:34:52.655000	0.485152	0.577246	-0.0605607	0.0557644	CDKN1A;RPLP1
							Fc receptor mediated stimulatory signaling pathway (GO:0002431)	0.487241	13:07:31.516000	0.578522	0.64453	-0.0737017	0.0529913	HSP90AA1;HSP90AB1
							cell-matrix adhesion (GO:0007160)	0.667495	16:37:35.798000	0.727908	0.758256	-0.130487	0.052746	RCC2
							negative regulation of cytokine production (GO:0001818)	0.739142	18:07:24.297000	0.795189	0.812892	-0.169893	0.0513528	UBB
							protein modification by small protein conjugation (GO:0032446)	0.346266	10:35:31.779000	0.502652	0.588564	-0.0477188	0.0506081	VCP;UBB;UBE2C;MDM2;RLIM;ELOB
							regulation of cell growth (GO:0001558)	0.437761	12:14:37.814000	0.550142	0.621943	-0.0612466	0.0505947	CDKN1A;JADE1;SGK1
							cellular response to light stimulus (GO:0071482)	0.555235	0.603161	0.617591	0.673051	-0.0826115	0.0486057	PARP1
							positive regulation of neuron differentiation (GO:0045666)	0.698245	0.718546	0.75712	0.780551	-0.134079	0.048159	STMN2
							response to lipid (GO:0033993)	0.506322	0.564093	0.597947	0.658828	-0.0707172	0.0481288	SPP1;AQP3
							histone modification (GO:0016570)	0.698245	17:14:42.350000	0.75712	0.780551	-0.13203	0.0474233	MIER1
							neutrophil chemotaxis (GO:0030593)	0.479409	0.541648	0.540283	0.614418	-0.0623514	0.0458408	PLA2G1B
							cation transport (GO:0006812)	0.620056	0.654739	0.681951	0.721891	-0.0956739	0.045727	ATOX1
							phosphatidylinositol metabolic process (GO:0046488)	0.745399	18:15:17.633000	0.80093	0.817776	-0.155345	0.0456459	PLA2G1B
							organelle assembly (GO:0070925)	0.473971	12:52:33.044000	0.623029	0.676375	-0.0557903	0.0416535	ATG14;ATP6V0D1;DYNLL1;ATP6V1D;CDC14A
							positive regulation of cell differentiation (GO:0045597)	0.681561	16:56:08.180000	0.766069	0.787864	-0.105157	0.0403138	HSP90AB1;PA2G4
							regulation of gene silencing by miRNA (GO:0060964)	0.56059	14:34:08.059000	0.622971	0.676375	-0.0695196	0.0402356	FXR1
							positive regulation of cellular metabolic process (GO:0031325)	0.675463	16:47:39.551000	0.735523	0.764782	-0.10157	0.0398517	CDKN1A
							vesicle fusion (GO:0006906)	0.683241	16:58:01.284000	0.742926	0.771536	-0.10252	0.0390505	CALR
							cytoskeleton organization (GO:0007010)	0.785211	0.797414	0.836868	0.850585	-0.157127	0.0379938	CFL1
							positive regulation of B cell activation (GO:0050871)	0.766147	0.779452	0.819788	0.835024	-0.126125	0.0335974	MIF
							snRNA transcription from RNA polymerase II promoter (GO:0042795)	0.576273	14:52:19.995000	0.638665	0.688947	-0.0569859	0.0314091	SP1
							cellular response to organonitrogen compound (GO:0071417)	0.694562	0.716056	0.753647	0.77886	-0.0852801	0.0310823	HSP90B1
							cellular defense response (GO:0006968)	0.497976	0.555888	0.559401	0.629418	-0.044045	0.0307083	VEZF1
							regulation of vesicle-mediated transport (GO:0060627)	0.814359	0.82259	0.862483	0.871201	-0.142252	0.029212	DNAJC13
							positive regulation of secretion by cell (GO:1903532)	0.473069	12:51:35.640000	0.533729	0.607371	-0.0359151	0.0268829	PLA2G1B
							positive regulation of angiogenesis (GO:0045766)	0.716009	17:38:27.870000	0.77377	0.794342	-0.0738822	0.0246813	SP1
							regulation of GTPase activity (GO:0043087)	0.664903	0.691776	0.750937	0.777952	-0.060036	0.0245016	RCC2;SOD1
							negative regulation of NF-kappaB transcription factor activity (GO:0032088)	0.633625	15:58:05.800000	0.6952	0.731359	-0.0507393	0.0231523	TMSB4X
							regulation of neuron projection development (GO:0010975)	0.766147	18:42:24.610000	0.819788	0.835024	-0.0788901	0.0210148	STMN2
							positive regulation of protein targeting to mitochondrion (GO:1903955)	0.629156	15:53:41.862000	0.690846	0.728583	-0.0439686	0.020374	TOMM7
							cellular response to organic substance (GO:0071310)	0.802726	0.812288	0.852337	0.863004	-0.0854422	0.0187752	PARK7
							cellular response to oxygen-containing compound (GO:1901701)	0.64395	0.672861	0.750691	0.777952	-0.0366985	0.0161523	SNW1;PARK7;HSP90B1
							regulation of anatomical structure morphogenesis (GO:0022603)	0.633625	0.665345	0.6952	0.731359	-0.0286819	0.0130875	CFL1
							protein K48-linked ubiquitination (GO:0070936)	0.446931	12:21:49.195000	0.506569	0.590303	-0.0129419	0.0104228	UBE2C
							positive regulation of cellular amide metabolic process (GO:0034250)	0.527468	13:56:53.356000	0.589521	0.652505	-0.0139661	0.00893361	FXR1
							negative regulation of response to external stimulus (GO:0032102)	0.729467	17:55:02.913000	0.786269	0.804741	-0.0262891	0.00829266	VPS35
							antigen receptor-mediated signaling pathway (GO:0050851)	0.60094	0.63878	0.711486	0.746182	-0.0113862	0.00579855	UBB;PSMB3;PSMA7
							central nervous system development (GO:0007417)	0.487343	0.546893	0.60123	0.660731	-0.00734926	0.00528256	FXR1;COX7B;BPTF
							cellular response to cytokine stimulus (GO:0071345)	0.309985	10:04:10.415000	0.474973	0.570515	-0.00407973	0.00477832	CDKN1A;HSP90AA1;CCND1;UBB;TDGF1;YBX3;HSP90B1
							cellular response to hormone stimulus (GO:0032870)	0.624633	15:48:36.312000	0.68643	0.725276	-0.00560319	0.00263681	KLF9
							autophagosome organization (GO:1905037)	0.497976	13:20:28.747000	0.559401	0.629418	0.000661923	-0.000461494	ATG14
							regulation of mitotic cell cycle (GO:0007346)	0.594568	0.63453	0.685007	0.724674	0.00262147	-0.00136295	MDM2;MAP4K4
							anterograde trans-synaptic signaling (GO:0098916)	0.946453	22:48:31.856000	0.96799	0.971994	0.0632858	-0.00348286	PAFAH1B1
							positive regulation of MAPK cascade (GO:0043410)	0.9706	0.971743	0.984167	0.985196	0.170523	-0.00508862	MIF
							T cell activation (GO:0042110)	0.659331	0.68682	0.720074	0.753328	0.017694	-0.00737005	HSPD1
							chemical synaptic transmission (GO:0007268)	0.9706	23:19:18.638000	0.984167	0.985196	0.259107	-0.00773209	PAFAH1B1
							nervous system development (GO:0007399)	0.974564	0.974564	0.989107	0.989107	0.321078	-0.00827245	FXR1;COX7B
							regulation of ERK1 and ERK2 cascade (GO:0070372)	0.950844	22:54:04.070000	0.971048	0.974489	0.168341	-0.00848529	MIF
							positive regulation of protein kinase B signaling (GO:0051897)	0.787805	0.79957	0.839173	0.852215	0.0432573	-0.0103171	PARK7
							positive regulation of cytosolic calcium ion concentration (GO:0007204)	0.802726	0.812288	0.852337	0.863004	0.0502398	-0.0110398	PLA2G1B
							regulation of immune response (GO:0050776)	0.95319	22:56:38.703000	0.972663	0.975534	0.248838	-0.0119295	PLA2G1B
							organonitrogen compound biosynthetic process (GO:1901566)	0.89	21:29:57.088000	0.925523	0.931554	0.108187	-0.0126075	GSTA4
							phosphate-containing compound metabolic process (GO:0006796)	0.650493	16:17:33.725000	0.737694	0.76657	0.031295	-0.0134576	ALDOA;CALM1
							positive regulation of signal transduction (GO:0009967)	0.918899	0.923793	0.947903	0.952951	0.159258	-0.0134699	SNW1
							regulation of small GTPase mediated signal transduction (GO:0051056)	0.818819	0.826603	0.866345	0.874581	0.0786706	-0.0157257	SQSTM1
							cellular protein localization (GO:0034613)	0.756545	0.771531	0.846146	0.857758	0.0585115	-0.0163243	VPS26A;VPS35;SNX6
							positive regulation of cell motility (GO:2000147)	0.638616	0.668933	0.726674	0.758256	0.0409575	-0.0183674	HSPA5;TDGF1
							cellular response to lipid (GO:0071396)	0.635598	16:00:29.223000	0.723859	0.756523	0.0488049	-0.0221179	SNW1;SPP1
							regulation of release of sequestered calcium ion into cytosol (GO:0051279)	0.453584	12:28:17.634000	0.513503	0.593095	0.0282727	-0.0223517	CALM1
							protein targeting (GO:0006605)	0.479481	0.541648	0.570562	0.639029	0.0327594	-0.0240798	TIMM13;TOMM7
							proteolysis (GO:0006508)	0.971311	0.971883	0.984616	0.985196	0.840297	-0.0244596	MDM2
							generation of neurons (GO:0048699)	0.795401	0.805835	0.845895	0.857758	0.113662	-0.0260184	PAFAH1B1
							regulation of protein localization (GO:0032880)	0.398045	11:34:52.655000	0.455199	0.55639	0.0293652	-0.027051	PARP1
							Golgi vesicle transport (GO:0048193)	0.96335	0.965623	0.979489	0.9818	0.732453	-0.027349	DYNLL1
							DNA replication (GO:0006260)	0.427366	0.502488	0.516227	0.594623	0.0361078	-0.0306958	DUT;NAP1L1
							cellular divalent inorganic cation homeostasis (GO:0072503)	0.709032	0.728323	0.767251	0.788126	0.0973204	-0.0334641	CALR
							negative regulation of signal transduction (GO:0009968)	0.857624	0.86475	0.912478	0.92006	0.219683	-0.033741	UBB;CALR
							positive regulation of hydrolase activity (GO:0051345)	0.34408	0.439874	0.448685	0.552804	0.0364856	-0.0389257	VCP;CALM1;PFN1
							regulation of protein localization to plasma membrane (GO:1903076)	0.56059	0.607038	0.622971	0.676375	0.0677049	-0.0391853	SQSTM1
							response to cytokine (GO:0034097)	0.814359	0.82259	0.862483	0.871201	0.192588	-0.0395488	IFITM3
							extracellular matrix organization (GO:0030198)	0.938751	0.943192	0.962522	0.967075	0.633611	-0.0400472	SPP1
							regulation of peptide hormone secretion (GO:0090276)	0.591399	0.631544	0.653709	0.700284	0.0778453	-0.0408894	SLC25A5
							positive regulation of neuron projection development (GO:0010976)	0.694562	0.716056	0.753647	0.77886	0.11506	-0.0419363	STMN2
							cellular response to heat (GO:0034605)	0.440197	0.51016	0.499537	0.58532	0.0520103	-0.0426762	HSPA5
							monocarboxylic acid metabolic process (GO:0032787)	0.732731	0.749043	0.789284	0.807342	0.140172	-0.0435904	LDHA
							regulation of signal transduction (GO:0009966)	0.534733	0.586515	0.648386	0.696305	0.0720387	-0.0450953	SNW1;IGFBP2;TDGF1
							positive regulation of T cell activation (GO:0050870)	0.565881	14:40:08.441000	0.628277	0.680333	0.0879115	-0.0500543	HSPD1
							regulation of protein kinase B signaling (GO:0051896)	0.587959	0.629454	0.67865	0.719741	0.09693	-0.0514793	DDIT3;PARK7
							negative regulation of cell migration (GO:0030336)	0.77176	0.784691	0.824842	0.839669	0.199358	-0.0516502	CALR
							regulation of angiogenesis (GO:0045765)	0.884507	0.891327	0.921144	0.928247	0.491048	-0.0602639	SP1
							ER to Golgi vesicle-mediated transport (GO:0006888)	0.888651	21:28:45.637000	0.924451	0.931027	0.611333	-0.0721679	DYNLL1
							regulation of cell communication (GO:0010646)	0.581376	0.623584	0.64375	0.692235	0.1411	-0.0765267	TDGF1
							antigen processing and presentation of peptide antigen via MHC class II (GO:0002495)	0.698245	0.718546	0.75712	0.780551	0.224751	-0.080727	DYNLL1
							BMP signaling pathway (GO:0030509)	0.629156	0.66229	0.690846	0.728583	0.174804	-0.0810001	TDGF1
							inositol phosphate metabolic process (GO:0043647)	0.440197	0.51016	0.499537	0.58532	0.0990428	-0.0812679	CALM1
							negative regulation of defense response (GO:0031348)	0.624633	0.658754	0.68643	0.725276	0.177884	-0.0837104	VPS35
							cellular response to BMP stimulus (GO:0071773)	0.655175	16:23:23.386000	0.716073	0.750067	0.198512	-0.0839412	TDGF1
							protein N-linked glycosylation (GO:0006487)	0.591399	0.631544	0.653709	0.700284	0.163306	-0.0857789	VCP
							regulation of protein binding (GO:0043393)	0.742289	0.757902	0.79808	0.815356	0.288514	-0.0859817	PARK7
							positive regulation of apoptotic signaling pathway (GO:2001235)	0.605987	15:25:27.433000	0.668129	0.711247	0.172063	-0.0861857	FAM162A
							negative regulation of binding (GO:0051100)	0.633625	15:58:05.800000	0.6952	0.731359	0.193571	-0.0883263	PARK7
							positive regulation of ERK1 and ERK2 cascade (GO:0070374)	0.913799	22:03:39.686000	0.94404	0.949629	0.980608	-0.0883965	MIF
							negative regulation of inflammatory response (GO:0050728)	0.615422	0.650655	0.677408	0.718874	0.186276	-0.0904272	VPS35
							regulation of T cell proliferation (GO:0042129)	0.533156	0.585163	0.595294	0.65633	0.143844	-0.090469	SDC4
							negative regulation of cell differentiation (GO:0045596)	0.839566	20:19:44.623000	0.884093	0.891968	0.530262	-0.092727	ANP32B
							regulation of cell migration (GO:0030334)	0.529628	0.583174	0.661518	0.706076	0.171331	-0.108895	HSPA5;RCC2;SGK1;TDGF1
							defense response to bacterium (GO:0042742)	0.789707	0.801022	0.859248	0.868966	0.477881	-0.112825	PLA2G1B;RPL39
							positive regulation of vasculature development (GO:1904018)	0.719435	0.737225	0.776962	0.796175	0.349241	-0.115002	SP1
							positive regulation of developmental growth (GO:0048639)	0.466652	0.530684	0.527082	0.602633	0.153364	-0.11689	PPIB
							antigen processing and presentation of exogenous peptide antigen via MHC class II (GO:0019886)	0.694562	17:11:07.278000	0.753647	0.77886	0.33518	-0.122164	DYNLL1
							cellular response to transforming growth factor beta stimulus (GO:0071560)	0.70548	17:24:47.608000	0.763922	0.786132	0.358332	-0.125014	UBB
							regulation of JNK cascade (GO:0046328)	0.667495	16:37:35.798000	0.727908	0.758256	0.310237	-0.125405	MAP4K4
							positive regulation of response to DNA damage stimulus (GO:2001022)	0.453584	12:28:17.634000	0.513503	0.593095	0.161266	-0.127493	H2AFX
							cellular protein modification process (GO:0006464)	0.317617	10:11:55.989000	0.565098	0.635408	0.112299	-0.128796	FEM1B;PLK2;PARK7;PDIA6;PSMA7;HSP90B1;CCNE1;PSMB3;WNK1;SPP1;TLK2;ELOB;SGK1;MAP4K4
							antigen processing and presentation of exogenous peptide antigen (GO:0002478)	0.694562	17:11:07.278000	0.753647	0.77886	0.355798	-0.129679	DYNLL1
							regulation of heart contraction (GO:0008016)	0.687061	17:02:27.998000	0.74655	0.774352	0.378857	-0.142198	CALM1
							positive regulation of plasma membrane bounded cell projection assembly (GO:0120034)	0.571108	0.616072	0.633507	0.685124	0.265069	-0.148485	PFN1
							purine ribonucleotide metabolic process (GO:0009150)	0.555235	14:28:33.112000	0.617591	0.673051	0.253874	-0.14937	HINT1
							regulation of cardiac conduction (GO:1903779)	0.56059	14:34:08.059000	0.622971	0.676375	0.262097	-0.151693	CALM1
							phagocytosis (GO:0006909)	0.807464	0.816596	0.856482	0.866684	0.732161	-0.156578	PDIA6
							protein glycosylation (GO:0006486)	0.795401	19:20:24.171000	0.845895	0.857758	0.685954	-0.157021	PARP1
							negative regulation of autophagy (GO:0010507)	0.433381	12:09:13.516000	0.492405	0.582182	0.193734	-0.161988	TLK2
							positive regulation of intracellular protein transport (GO:0090316)	0.550198	0.599222	0.641814	0.691905	0.274909	-0.164252	TOMM7;ANP32B
							regulation of cytoskeleton organization (GO:0051493)	0.687061	0.710046	0.74655	0.774352	0.442559	-0.166107	STMN2
							regulation of cellular macromolecule biosynthetic process (GO:2000112)	0.348276	0.443236	0.545098	0.618868	0.177912	-0.187655	HINT1;TCOF1;SP1;DDIT3;NME2;NOLC1;CALR;CNOT8;BPTF
							positive regulation of lymphocyte activation (GO:0051251)	0.719435	0.737225	0.776962	0.796175	0.587124	-0.193334	HSPD1
							glycerophospholipid biosynthetic process (GO:0046474)	0.591274	15:09:25.393000	0.681841	0.721891	0.374956	-0.19703	PLA2G1B;ETNK1
							peptidyl-threonine modification (GO:0018210)	0.663438	16:34:34.264000	0.724018	0.756523	0.495053	-0.20313	WNK1
							negative regulation of macromolecule metabolic process (GO:0010605)	0.4437	0.513869	0.53342	0.607371	0.268028	-0.217801	MIF;PARK7
							vesicle-mediated transport (GO:0016192)	0.729864	17:55:02.913000	0.837068	0.850585	0.694527	-0.218705	VPS26A;VPS35;ATG14;SNX6
							cellular response to interferon-gamma (GO:0071346)	0.75747	18:31:01.706000	0.811934	0.828017	0.820303	-0.227857	TDGF1
							regulation of cell division (GO:0051302)	0.549815	0.599189	0.612134	0.669682	0.390331	-0.233486	CALM1
							glycosphingolipid metabolic process (GO:0006687)	0.485673	13:06:23.087000	0.546746	0.618868	0.33338	-0.240774	HEXA
							transmembrane receptor protein tyrosine kinase signaling pathway (GO:0007169)	0.342012	10:32:56.651000	0.497829	0.58532	0.236497	-0.25374	ATP6V0B;HSP90AA1;UBB;ATP6V0D1;ATP6V1D;ATP6V1C1
							positive regulation of cell migration (GO:0030335)	0.499412	13:22:15.617000	0.613396	0.670199	0.37802	-0.262468	HSPA5;PFN1;TDGF1
							type I interferon signaling pathway (GO:0060337)	0.549815	14:22:49.897000	0.612134	0.669682	0.447529	-0.2677	IFITM3
							regulation of cytokinesis (GO:0032465)	0.610733	15:31:32.578000	0.672801	0.715325	0.560171	-0.276218	CALM1
							regulation of Ras protein signal transduction (GO:0046578)	0.667495	0.692775	0.727908	0.758256	0.704139	-0.28463	SQSTM1
							positive regulation of protein serine/threonine kinase activity (GO:0071902)	0.419106	0.496332	0.507475	0.590547	0.327825	-0.285087	CCND1;CALM1
							positive regulation of cytoskeleton organization (GO:0051495)	0.610733	15:31:32.578000	0.672801	0.715325	0.614906	-0.303207	PFN1
							positive regulation of macromolecule metabolic process (GO:0010604)	0.648791	0.677502	0.755012	0.779796	0.701703	-0.303589	SP1;VPS35;PARK7
							negative regulation of cell proliferation (GO:0008285)	0.638606	16:03:15.784000	0.761491	0.78458	0.687967	-0.30853	CDKN1A;FABP3;CNOT8;NME1
							negative regulation of growth (GO:0045926)	0.427366	0.502488	0.516227	0.594623	0.383692	-0.326182	CDKN1A;JADE1
							positive regulation of gene expression (GO:0010628)	0.448185	0.516248	0.661608	0.706076	0.425208	-0.34125	FXR1;KLF6;CCNE1;SP1;DDIT3;SPP1;VPS35;PARK7;TAF3;BPTF
							regulation of intracellular signal transduction (GO:1902531)	0.575841	0.619676	0.719983	0.753328	0.63809	-0.352177	UBB;TMSB4X;MDM2;SQSTM1;TAF3
							Fc-gamma receptor signaling pathway (GO:0038094)	0.48337	13:05:46.572000	0.574555	0.641795	0.500734	-0.364021	HSP90AA1;HSP90AB1
							positive regulation of intracellular signal transduction (GO:1902533)	0.354473	0.446773	0.526161	0.602633	0.363636	-0.377135	UBB;EEF1D;PLK2;MIER1;S100A13;MIF;PARK7
							transmembrane receptor protein serine/threonine kinase signaling pathway (GO:0007178)	0.521253	0.577075	0.613001	0.670198	0.587329	-0.382657	UBB;TDGF1
							protein complex assembly (GO:0006461)	0.39944	0.483506	0.509426	0.592413	0.463814	-0.425638	AHNAK;DDIT3;TRA2B
							regulation of nucleic acid-templated transcription (GO:1903506)	0.597351	15:15:07.505000	0.763312	0.78598	1.01313	-0.522017	HINT1;SP1;DDIT3;NME2;CALR;CNOT8;BPTF
							positive regulation of nucleic acid-templated transcription (GO:1903508)	0.399554	11:36:14.880000	0.575401	0.642316	0.636969	-0.58436	KLF6;CCNE1;SP1;DDIT3;SPP1;TAF3;BPTF

## Sheet: Cluster3-Molecular Function
Term	P-value	Adjusted P-value	Old P-value	Old Adjusted P-value	Z-score	Combined Score	Genes
RNA binding (GO:0003723)	5.3604e-29	1.60276e-26	1.86831e-23	5.58625e-21	-1.37251	89.3448	EIF4A2;HSP90AB1;MRPS12;RPLP0;PARK7;YBX3;TUBA1B;SNRPD2;TMSB4X;RPL37;SNRPD3;RPL39;CCT3;PDIA3;TOP3B;PNISR;HSP90AA1;RPS9;PARP1;RPL22;NME1;PDIA4;PKM;EEF1D;NCL;SUB1;ZC3H11A;RPL37A;NHP2;SRSF3;SUCLG1;SNRPF;SREK1;ALDOA;NSRP1;PFN1;PPIB;SLC25A5;SRSF6;FKBP3;SRSF7;VCP;AHNAK;ANP32A;KMT2C;NOLC1;HSP90B1;HSPD1;FXR1;TCOF1;PRDX1;TRA2B;DHX36;RPL14;LYAR;RPL39L;SPEN;RBM39;DUT;RPL41;ZRANB2;MDH2;RCC2;NAP1L1;PA2G4;HSPE1;…
hydrogen ion transmembrane transporter activity (GO:0015078)	1.82653e-07	2.73066e-05	2.6962e-06	0.000403082	-2.20523	34.2157	ATP6V0B;UQCRQ;UQCR11;ATP5G3;UQCR10;ATP6V0D1;ATP5G1;ATP6V1C1
ATPase activity, coupled to transmembrane movement of ions, rotational mechanism (GO:0044769)	1.2778e-05	0.000764125	8.52959e-05	0.00850115	-2.91504	32.8461	ATP6V0B;ATP5G3;ATP6V0D1;ATP5G1;ATP6V1C1
oxidoreductase activity, acting on diphenols and related substances as donors, cytochrome as acceptor (GO:0016681)	0.000135896	0.00497206	0.000644419	0.021409	-3.56001	31.697	UQCRQ;UQCR11;UQCR10
ubiquinol-cytochrome-c reductase activity (GO:0008121)	0.000135896	0.00497206	0.000644419	0.021409	-3.49966	31.1596	UQCRQ;UQCR11;UQCR10
proton-transporting ATP synthase activity, rotational mechanism (GO:0046933)	0.00874321	0.0768888	0.0177969	0.16125	-6.18506	29.3139	ATP5G3;ATP5G1
RNA polymerase I core binding (GO:0001042)	0.00289418	0.0360567	0.00739206	0.0920928	-4.31862	25.2426	TCOF1;NOLC1
cadherin binding (GO:0045296)	6.43093e-06	0.00064095	0.000115788	0.00865513	-2.03078	24.2767	RANBP1;HSP90AB1;AHNAK;HSPA5;PARK7;PAICS;EEF1G;LDHA;EIF5;PKM;EEF1D;PRDX1;RPL14;ALDOA;PFN1
peptide disulfide oxidoreductase activity (GO:0015037)	0.000192418	0.00523026	0.000828616	0.0225233	-2.77757	23.7645	PDIA3;PDIA6;PDIA4
ubiquitin-like protein ligase binding (GO:0044389)	1.58262e-05	0.00078867	0.000231651	0.011544	-1.84511	20.3956	CDKN1A;VCP;TPI1;HSPA5;UBE2C;PA2G4;HSPD1;TUBA1B;DBT;MDM2;ELOB;CALR;SLC25A5;SQSTM1
disordered domain specific binding (GO:0097718)	0.000177909	0.00523026	0.000732074	0.021889	-2.18715	18.8844	HSP90AA1;HSP90AB1;MDM2;CALM1
ubiquitin protein ligase binding (GO:0031625)	9.58626e-06	0.000716573	0.000148965	0.00890809	-1.56592	18.0944	CDKN1A;VCP;TPI1;HSPA5;UBE2C;PA2G4;HSPD1;TUBA1B;DBT;MDM2;ELOB;CALR;SLC25A5;SQSTM1
proton-transporting ATPase activity, rotational mechanism (GO:0046961)	0.00102467	0.020425	0.00305968	0.0609896	-2.47657	17.0472	ATP6V0B;ATP6V0D1;ATP6V1C1
DNA ligase activity (GO:0003909)	0.00382844	0.0423965	0.00915025	0.101331	-2.95749	16.4593	LIG1;PARP1
hydrogen-exporting ATPase activity, phosphorylative mechanism (GO:0008553)	0.00605622	0.0584132	0.0131612	0.131173	-3.18675	16.2737	ATP6V0D1;ATP6V1C1
telomerase RNA binding (GO:0070034)	0.000149661	0.00497206	0.000634799	0.021409	-1.83148	16.1301	DHX36;NHP2;SNRPD3;NOP10
hydrogen-exporting ATPase activity (GO:0036442)	0.00222016	0.0301739	0.00584621	0.083239	-2.43969	14.907	ATP6V0B;ATP6V0D1;ATP6V1C1
MHC class II protein complex binding (GO:0023026)	0.00102467	0.020425	0.00305968	0.0609896	-2.12213	14.6074	HSP90AA1;HSP90AB1;PKM
nucleoside-triphosphate diphosphatase activity (GO:0047429)	0.00605622	0.0584132	0.0131612	0.131173	-2.76961	14.1435	DUT;DCTPP1
MHC protein complex binding (GO:0023023)	0.00167281	0.0272054	0.0046005	0.0777529	-2.19608	14.0401	HSP90AA1;HSP90AB1;PKM
double-stranded RNA binding (GO:0003725)	0.000761606	0.0175169	0.00276105	0.0609896	-1.8819	13.5122	FXR1;TUBA1B;HSP90AB1;DHX36;HSPD1
DNA ligase (ATP) activity (GO:0003910)	0.00289418	0.0360567	0.00739206	0.0920928	-2.28407	13.3505	LIG1;PARP1
dynactin binding (GO:0034452)	0.00874321	0.0768888	0.0177969	0.16125	-2.7213	12.8975	PAFAH1B1;SNX6
copper ion binding (GO:0005507)	0.00158269	0.0272054	0.0047414	0.0777529	-1.91205	12.3301	S100A13;PARK7;ATOX1;SOD1
disulfide oxidoreductase activity (GO:0015036)	0.00322917	0.0386209	0.00806041	0.0964026	-2.01296	11.5454	PDIA3;PDIA6;PDIA4
androgen receptor binding (GO:0050681)	0.00172877	0.0272054	0.00512333	0.0777529	-1.77325	11.2785	SNW1;CCNE1;CALR;PARK7
protein disulfide isomerase activity (GO:0003756)	0.00193443	0.0275425	0.00520086	0.0777529	-1.79638	11.2237	PDIA3;PDIA6;PDIA4
intramolecular oxidoreductase activity, transposing S-S bonds (GO:0016864)	0.00193443	0.0275425	0.00520086	0.0777529	-1.79375	11.2073	PDIA3;PDIA6;PDIA4
cuprous ion binding (GO:1903136)	0.0810475	0.277392	0.113002	0.395257	-4.2793	10.7527	PARK7
nucleobase-containing compound kinase activity (GO:0019205)	0.00598626	0.0584132	0.0137985	0.133089	-1.84044	9.41992	DTYMK;NME2;NME1
ATPase activity (GO:0016887)	0.0117909	0.09793	0.0382524	0.26688	-2.04424	9.07729	EIF4A2;HSP90AA1;VCP;HSPA5;DYNLL1;ATP5J2;HSPD1
ubiquitin-specific protease binding (GO:1990381)	0.0173209	0.117704	0.0318615	0.242675	-2.21681	8.99102	VCP;PARK7
G-quadruplex RNA binding (GO:0002151)	0.0810475	0.277392	0.113002	0.395257	-3.54508	8.90778	DHX36
histone deacetylase binding (GO:0042826)	0.000592246	0.0147568	0.00246222	0.0609896	-1.18295	8.79122	HSP90AA1;HSP90AB1;CCND1;SP1;DHX36;MIER1
actin monomer binding (GO:0003785)	0.00361833	0.0416108	0.0088936	0.101331	-1.54856	8.70561	TMSB4X;PFN1;TMSB10
DNA polymerase binding (GO:0070182)	0.0173209	0.117704	0.0318615	0.242675	-2.0841	8.45278	HSP90AA1;HSP90AB1
RNA polymerase binding (GO:0070063)	0.0236358	0.147231	0.0418144	0.284148	-2.16413	8.10465	ANP32B;PPIB
histone methyltransferase activity (H3-K4 specific) (GO:0042800)	0.0173209	0.117704	0.0318615	0.242675	-1.97311	8.00261	KMT2C;DPY30
phosphotransferase activity, phosphate group as acceptor (GO:0016776)	0.0138846	0.106448	0.0290739	0.241475	-1.86182	7.96295	DTYMK;NME2;NME1
protein homodimerization activity (GO:0042803)	0.0147095	0.109953	0.0815833	0.395257	-1.8602	7.84868	HSP90AA1;HSP90AB1;ATPIF1;DPY30;CACYBP;PARK7;SOD1;FXR1;GSTA4;SP1;DDIT3;S100A13;BANF1;PAFAH1B1;SNX6
inositol trisphosphate kinase activity (GO:0051766)	0.0810475	0.277392	0.113002	0.395257	-3.06487	7.70115	CALM1
histone methyltransferase binding (GO:1990226)	0.0810475	0.277392	0.113002	0.395257	-2.98249	7.49417	HSP90AB1
urea transmembrane transporter activity (GO:0015204)	0.0810475	0.277392	0.113002	0.395257	-2.97134	7.46614	AQP3
protein kinase activator activity (GO:0030295)	0.00455771	0.0486698	0.0120721	0.128913	-1.38079	7.44373	CDKN1A;WNK1;RPLP1;CALM1
mRNA binding (GO:0003729)	0.00152457	0.0272054	0.00704766	0.0920928	-1.13287	7.34784	FXR1;RPL41;NCL;TRA2B;CALR;PARK7;NSRP1;YBX3
aldehyde-lyase activity (GO:0016832)	0.0920788	0.277392	0.126203	0.395257	-2.99971	7.15463	ALDOA
ATPase regulator activity (GO:0060590)	0.0113467	0.0969335	0.0242894	0.213604	-1.5438	6.91443	ATPIF1;FNIP1;PFN1
phospholipase binding (GO:0043274)	0.0920788	0.277392	0.126203	0.395257	-2.86367	6.83018	PAFAH1B1
long-chain fatty acid binding (GO:0036041)	0.0810475	0.277392	0.113002	0.395257	-2.71669	6.82628	FABP3
ATPase activity, coupled to transmembrane movement of ions, phosphorylative mechanism (GO:0015662)	0.0307434	0.176775	0.0527626	0.33566	-1.94694	6.77941	ATP6V0D1;ATP6V1C1
G-quadruplex DNA binding (GO:0051880)	0.0920788	0.277392	0.126203	0.395257	-2.83119	6.7527	DHX36
protein phosphatase activator activity (GO:0072542)	0.102978	0.277392	0.139209	0.395257	-2.93887	6.68074	CALM1
macromolecule transmembrane transporter activity (GO:0022884)	0.113747	0.28342	0.152022	0.395257	-3.00317	6.52823	TOMM7
ATP binding (GO:0005524)	0.0124019	0.100221	0.043628	0.289884	-1.47247	6.46401	HSP90AA1;HSP90AB1;HSPA5;WNK1;TLK2;SMC4;MAP4K4;NME1
protein phosphatase 2B binding (GO:0030346)	0.0810475	0.277392	0.113002	0.395257	-2.56951	6.45646	SOD1
nucleoside diphosphate kinase activity (GO:0004550)	0.0214395	0.139357	0.0383807	0.26688	-1.67368	6.43115	NME2;NME1
mRNA 5'-UTR binding (GO:0048027)	0.0307434	0.176775	0.0527626	0.33566	-1.84043	6.40852	RPL41;NCL
adenyl ribonucleotide binding (GO:0032559)	0.00689788	0.0644521	0.028771	0.241475	-1.27273	6.33379	HSP90AA1;HSP90AB1;HSPA5;WNK1;TLK2;SMC4;APRT;MAP4K4;NME1
NEDD8 transferase activity (GO:0019788)	0.0810475	0.277392	0.113002	0.395257	-2.50721	6.29993	MDM2
cation-transporting ATPase activity (GO:0019829)	0.0500585	0.236959	0.081599	0.395257	-2.09664	6.27854	ATP5G3;ATP5G1
calcium channel regulator activity (GO:0005246)	0.0413435	0.216483	0.0687268	0.395257	-1.95739	6.23593	CALM1;SGK1
malate dehydrogenase activity (GO:0016615)	0.0810475	0.277392	0.113002	0.395257	-2.47553	6.22032	MDH2
phosphatase activator activity (GO:0019211)	0.113747	0.28342	0.152022	0.395257	-2.81315	6.11516	CALM1
protein transporter activity (GO:0008565)	0.0163821	0.117704	0.0377706	0.26688	-1.46905	6.04008	TIMM13;TOMM7;VPS26A;VPS35
exoribonuclease activity, producing 5'-phosphomonoesters (GO:0016896)	0.0385799	0.209734	0.0646004	0.38631	-1.83065	5.95882	CNOT8;REXO2
calcium-dependent phospholipase A2 activity (GO:0047498)	0.0920788	0.277392	0.126203	0.395257	-2.43943	5.81831	PLA2G1B
purine nucleobase transmembrane transporter activity (GO:0005345)	0.0810475	0.277392	0.113002	0.395257	-2.31333	5.81276	SLC25A5
insulin-like growth factor II binding (GO:0031995)	0.0920788	0.277392	0.126203	0.395257	-2.43706	5.81265	IGFBP2
bile acid binding (GO:0032052)	0.102978	0.277392	0.139209	0.395257	-2.54362	5.78226	PLA2G1B
AT DNA binding (GO:0003680)	0.0920788	0.277392	0.126203	0.395257	-2.41574	5.7618	CRIP1
kinase activator activity (GO:0019209)	0.0358906	0.198727	0.0605618	0.369551	-1.71393	5.70273	WNK1;RPLP1
steroid hormone receptor binding (GO:0035258)	0.0138252	0.106448	0.0324649	0.242675	-1.30589	5.59088	SNW1;CCNE1;CALR;PARK7
RAGE receptor binding (GO:0050786)	0.113747	0.28342	0.152022	0.395257	-2.53575	5.51216	S100A13
activin receptor binding (GO:0070697)	0.102978	0.277392	0.139209	0.395257	-2.42273	5.50744	TDGF1
chloride channel inhibitor activity (GO:0019869)	0.113747	0.28342	0.152022	0.395257	-2.42688	5.27549	WNK1
mRNA 3'-UTR binding (GO:0003730)	0.0416435	0.216483	0.0777315	0.395257	-1.64771	5.23742	FXR1;RPL41;YBX3
cAMP response element binding protein binding (GO:0008140)	0.102978	0.277392	0.139209	0.395257	-2.30193	5.23284	DDIT3
prenyltransferase activity (GO:0004659)	0.134901	0.292285	0.177083	0.398103	-2.56797	5.1442	COX10
calcium channel inhibitor activity (GO:0019855)	0.124388	0.288309	0.164646	0.398103	-2.4423	5.09062	CALM1
amide transmembrane transporter activity (GO:0042887)	0.102978	0.277392	0.139209	0.395257	-2.19404	4.98758	AQP3
glutathione transferase activity (GO:0004364)	0.0530979	0.236959	0.0860429	0.395257	-1.68921	4.95886	EEF1G;GSTA4
pre-mRNA binding (GO:0036002)	0.0530979	0.236959	0.0860429	0.395257	-1.64189	4.81996	TRA2B;SRSF6
phospholipase A2 activity (GO:0004623)	0.0530979	0.236959	0.0860429	0.395257	-1.63639	4.8038	PLA2G1B;PAFAH1B1
ATPase activity, coupled (GO:0042623)	0.027569	0.168227	0.0600314	0.369551	-1.32958	4.77459	HSPA5;DHX36;GTF2H1;BPTF
ATP transmembrane transporter activity (GO:0005347)	0.113747	0.28342	0.152022	0.395257	-2.19453	4.77041	SLC25A5
snoRNA binding (GO:0030515)	0.0530979	0.236959	0.0860429	0.395257	-1.60985	4.7259	NHP2;NOP10
channel activity (GO:0015267)	0.0470849	0.236959	0.0772295	0.395257	-1.54119	4.70958	TOMM7;AQP3
GDP-dissociation inhibitor activity (GO:0005092)	0.102978	0.277392	0.139209	0.395257	-2.0589	4.68036	RANBP1
Rho GTPase binding (GO:0017048)	0.0575462	0.245805	0.103815	0.395257	-1.61941	4.62369	RCC2;YBX3;SOD1
kinase binding (GO:0019900)	0.0304474	0.176775	0.106935	0.395257	-1.31626	4.59607	CDKN1A;HSP90AB1;CCND1;PARP1;WNK1;RCC2;WWC2;PARK7;CALM1;SQSTM1
complement component C1q binding (GO:0001849)	0.113747	0.28342	0.152022	0.395257	-2.11075	4.58829	CALR
ion channel inhibitor activity (GO:0008200)	0.0625918	0.25993	0.0997905	0.395257	-1.65048	4.57368	WNK1;CALM1
adenylate cyclase binding (GO:0008179)	0.124388	0.288309	0.164646	0.398103	-2.14279	4.46634	CALM1
hexosaminidase activity (GO:0015929)	0.134901	0.292285	0.177083	0.398103	-2.21883	4.4448	HEXA
protein channel activity (GO:0015266)	0.134901	0.292285	0.177083	0.398103	-2.18698	4.38099	TOMM7
peptidyl-prolyl cis-trans isomerase activity (GO:0003755)	0.0795537	0.277392	0.123913	0.395257	-1.71562	4.3428	PPIB;FKBP3
intramolecular oxidoreductase activity, transposing C=C bonds (GO:0016863)	0.134901	0.292285	0.177083	0.398103	-2.16151	4.32997	MIF
cyclin-dependent protein serine/threonine kinase activity (GO:0004693)	0.0625918	0.25993	0.0997905	0.395257	-1.56175	4.32779	CDKN1A;CCND1
cyclin-dependent protein kinase activity (GO:0097472)	0.0658752	0.262623	0.104502	0.395257	-1.57737	4.29043	CDKN1A;CCND1
RNA polymerase core enzyme binding (GO:0043175)	0.0658752	0.262623	0.104502	0.395257	-1.55268	4.22328	TCOF1;NOLC1
purine ribonucleoside triphosphate binding (GO:0035639)	0.0508759	0.236959	0.151504	0.395257	-1.39248	4.1473	HSP90AA1;TUBA1B;HSP90AB1;HSPA5;WNK1;TLK2;SMC4;MAP4K4;NME1
vitamin D receptor binding (GO:0042809)	0.165692	0.309637	0.213299	0.41684	-2.30152	4.13726	SNW1
3'-5' exonuclease activity (GO:0008408)	0.0795537	0.277392	0.123913	0.395257	-1.62109	4.1035	CNOT8;REXO2
death receptor binding (GO:0005123)	0.124388	0.288309	0.164646	0.398103	-1.96215	4.08981	FEM1B
peptide transmembrane transporter activity (GO:1904680)	0.165692	0.309637	0.213299	0.41684	-2.27094	4.08229	TOMM7
adenyl nucleotide binding (GO:0030554)	0.134901	0.292285	0.177083	0.398103	-2.00354	4.01353	PFN1
3'-5'-exoribonuclease activity (GO:0000175)	0.0562013	0.245805	0.0905582	0.395257	-1.39298	4.01013	CNOT8;REXO2
GTPase binding (GO:0051020)	0.065408	0.262623	0.116382	0.395257	-1.4641	3.99276	HSP90AA1;RCC2;ATG14
metal ion binding (GO:0046872)	0.0184694	0.122719	0.0762478	0.395257	-0.995695	3.97446	DUT;HSPA5;PLA2G1B;S100A13;CALR;CALM1;HSPE1;DCTPP1;ATOX1;HSP90B1;NME1
leucine zipper domain binding (GO:0043522)	0.124388	0.288309	0.164646	0.398103	-1.90328	3.9671	DDIT3
pyrophosphatase activity (GO:0016462)	0.0903359	0.277392	0.138992	0.395257	-1.63776	3.93755	PPA1;DCTPP1
DNA binding (GO:0003677)	0.0226477	0.144078	0.132412	0.395257	-1.02327	3.87583	PARP1;H2AFX;ARID5B;PA2G4;AFF4;CRIP1;YBX3;TBX3;HSPD1;CHCHD2;SP1;DDIT3;SUB1;DHX36;CALR;LYAR;BPTF;HMGN1
annealing activity (GO:0097617)	0.145288	0.299594	0.189335	0.416259	-2.00765	3.87283	FXR1
protein heterodimerization activity (GO:0046982)	0.0419934	0.216483	0.112991	0.395257	-1.18923	3.77016	FXR1;TCOF1;DDIT3;HEXA;NOLC1;SMC4;SNX6
DNA-dependent ATPase activity (GO:0008094)	0.0575462	0.245805	0.103815	0.395257	-1.31427	3.75245	DHX36;GTF2H1;BPTF
5S rRNA binding (GO:0008097)	0.113747	0.28342	0.152022	0.395257	-1.70848	3.71386	MDM2
translation elongation factor activity (GO:0003746)	0.155551	0.308012	0.201407	0.41684	-1.94521	3.61961	EEF1G
protein serine/threonine kinase activity (GO:0004674)	0.0346471	0.195462	0.111135	0.395257	-1.07347	3.60957	CDKN1A;CCND1;WNK1;PLK2;TLK2;GTF2H1;SGK1;SQSTM1;MAP4K4
single-stranded DNA binding (GO:0003697)	0.0893662	0.277392	0.153587	0.395883	-1.49423	3.60858	SUB1;DHX36;HSPD1
protein kinase C binding (GO:0005080)	0.0866953	0.277392	0.133921	0.395257	-1.4734	3.60298	HINT1;SQSTM1
protein tyrosine kinase binding (GO:1990782)	0.116974	0.286683	0.175522	0.398103	-1.67814	3.60095	HSP90AA1;SQSTM1
cyclin-dependent protein serine/threonine kinase inhibitor activity (GO:0004861)	0.124388	0.288309	0.164646	0.398103	-1.70279	3.54921	CDKN1A
poly(A)-specific ribonuclease activity (GO:0004535)	0.145288	0.299594	0.189335	0.416259	-1.83869	3.5469	CNOT8
water transmembrane transporter activity (GO:0005372)	0.155551	0.308012	0.201407	0.41684	-1.88643	3.51023	AQP3
protein serine/threonine/tyrosine kinase activity (GO:0004712)	0.165692	0.309637	0.213299	0.41684	-1.94746	3.50081	SGK1
polyubiquitin modification-dependent protein binding (GO:0031593)	0.0977483	0.277392	0.149256	0.395257	-1.49818	3.48382	VCP;SQSTM1
histone-lysine N-methyltransferase activity (GO:0018024)	0.0903359	0.277392	0.138992	0.395257	-1.44714	3.47925	KMT2C;DPY30
titin binding (GO:0031432)	0.165692	0.309637	0.213299	0.41684	-1.93254	3.47398	CALM1
MAP kinase kinase kinase kinase activity (GO:0008349)	0.134901	0.292285	0.177083	0.398103	-1.72868	3.46292	MAP4K4
acid-amino acid ligase activity (GO:0016881)	0.165692	0.309637	0.213299	0.41684	-1.87632	3.37292	PAICS
adenyl-nucleotide exchange factor activity (GO:0000774)	0.134901	0.292285	0.177083	0.398103	-1.68249	3.37039	PFN1
rRNA binding (GO:0019843)	0.0977483	0.277392	0.149256	0.395257	-1.44047	3.3496	RPS9;MDM2
ionotropic glutamate receptor binding (GO:0035255)	0.155551	0.308012	0.201407	0.41684	-1.79456	3.33928	SQSTM1
translation factor activity, RNA binding (GO:0008135)	0.0483988	0.236959	0.08893	0.395257	-1.08338	3.28079	EEF1G;EIF5;EEF1D
water channel activity (GO:0015250)	0.155551	0.308012	0.201407	0.41684	-1.75701	3.26941	AQP3
ribosomal small subunit binding (GO:0043024)	0.165692	0.309637	0.213299	0.41684	-1.81113	3.25573	NME1
insulin-like growth factor I binding (GO:0031994)	0.155551	0.308012	0.201407	0.41684	-1.73081	3.22065	IGFBP2
NADH dehydrogenase (ubiquinone) activity (GO:0008137)	0.0977483	0.277392	0.149256	0.395257	-1.37171	3.18973	NDUFA4;NDUFA3
transferase activity, transferring pentosyl groups (GO:0016763)	0.0940207	0.277392	0.144105	0.395257	-1.33375	3.15331	PARP1;APRT
ADP transmembrane transporter activity (GO:0015217)	0.124388	0.288309	0.164646	0.398103	-1.50278	3.13232	SLC25A5
DNA replication origin binding (GO:0003688)	0.145288	0.299594	0.189335	0.416259	-1.59925	3.08501	HSPD1
NADH dehydrogenase (quinone) activity (GO:0050136)	0.0977483	0.277392	0.149256	0.395257	-1.32649	3.08456	NDUFA4;NDUFA3
phospholipase activity (GO:0004620)	0.0519653	0.236959	0.0947696	0.395257	-1.04259	3.08312	PDIA3;PLA2G1B;PAFAH1B1
protein transmembrane transporter activity (GO:0008320)	0.18561	0.330342	0.236559	0.442069	-1.80021	3.03175	TOMM7
insulin-like growth factor binding (GO:0005520)	0.165692	0.309637	0.213299	0.41684	-1.67068	3.00326	IGFBP2
LRR domain binding (GO:0030275)	0.165692	0.309637	0.213299	0.41684	-1.63206	2.93383	DDIT3
FK506 binding (GO:0005528)	0.175711	0.322317	0.225016	0.434063	-1.63992	2.85168	FKBP3
retinoic acid receptor binding (GO:0042974)	0.18561	0.330342	0.236559	0.442069	-1.68697	2.84104	SNW1
Notch binding (GO:0005112)	0.195391	0.339515	0.247931	0.455856	-1.72311	2.81341	SNW1
peptidase activator activity (GO:0016504)	0.18561	0.330342	0.236559	0.442069	-1.60967	2.71085	VCP
Rac GTPase binding (GO:0048365)	0.0977483	0.277392	0.149256	0.395257	-1.13024	2.62822	RCC2;SOD1
protein phosphatase binding (GO:0019903)	0.101306	0.277392	0.171599	0.398103	-1.12903	2.58503	VCP;HSP90B1;SOD1
K63-linked polyubiquitin modification-dependent protein binding (GO:0070530)	0.224038	0.363549	0.281047	0.476083	-1.70502	2.55061	SQSTM1
DNA binding, bending (GO:0008301)	0.195391	0.339515	0.247931	0.455856	-1.5493	2.52962	CRIP1
protein-lysine N-methyltransferase activity (GO:0016279)	0.113056	0.28342	0.170208	0.398103	-1.11501	2.43059	KMT2C;DPY30
repressing transcription factor binding (GO:0070491)	0.13705	0.294805	0.202446	0.41684	-1.19973	2.38435	SP1;PARK7
NAD+ ADP-ribosyltransferase activity (GO:0003950)	0.205055	0.342523	0.259135	0.466755	-1.4901	2.36103	PARP1
low-density lipoprotein particle receptor binding (GO:0050750)	0.224038	0.363549	0.281047	0.476083	-1.55476	2.32583	HSP90B1
glutamate receptor binding (GO:0035254)	0.224038	0.363549	0.281047	0.476083	-1.49079	2.23013	SQSTM1
ubiquitin conjugating enzyme activity (GO:0061631)	0.224038	0.363549	0.281047	0.476083	-1.49011	2.22912	UBE2C
dynein complex binding (GO:0070840)	0.214604	0.356481	0.270172	0.476083	-1.43177	2.20344	PAFAH1B1
Ran GTPase binding (GO:0008536)	0.205055	0.342523	0.259135	0.466755	-1.34699	2.13426	RANBP1
histone methyltransferase activity (GO:0042054)	0.116974	0.286683	0.175522	0.398103	-0.986954	2.1178	KMT2C;DPY30
double-stranded DNA binding (GO:0003690)	0.119017	0.288309	0.197752	0.41684	-0.988358	2.10371	SP1;AFF4;YBX3
calcium ion binding (GO:0005509)	0.129316	0.292285	0.265671	0.472831	-0.98925	2.02351	HSPA5;PLA2G1B;S100A13;CALR;CALM1;HSP90B1
lipoprotein particle binding (GO:0071813)	0.251669	0.387881	0.312712	0.494714	-1.46052	2.015	HSPD1
core promoter proximal region DNA binding (GO:0001159)	0.242569	0.379729	0.302314	0.488605	-1.41935	2.01046	SP1
anion:anion antiporter activity (GO:0015301)	0.233359	0.373125	0.29176	0.481968	-1.37408	1.99952	SLC25A5
fibroblast growth factor binding (GO:0017134)	0.242569	0.379729	0.302314	0.488605	-1.40293	1.98721	S100A13
transcription corepressor activity (GO:0003714)	0.0997328	0.277392	0.200657	0.41684	-0.840287	1.93708	SNW1;CCND1;DDIT3;RLIM;YBX3
ubiquitin-like protein conjugating enzyme activity (GO:0061650)	0.233359	0.373125	0.29176	0.481968	-1.31343	1.91127	UBE2C
SUMO transferase activity (GO:0019789)	0.205055	0.342523	0.259135	0.466755	-1.19788	1.89801	MDM2
bHLH transcription factor binding (GO:0043425)	0.242569	0.379729	0.302314	0.488605	-1.33183	1.88649	SP1
protein kinase regulator activity (GO:0019887)	0.140537	0.298019	0.228714	0.438369	-0.924318	1.81377	CDKN1A;WNK1;RPLP1
monocarboxylic acid binding (GO:0033293)	0.242569	0.379729	0.302314	0.488605	-1.26301	1.78902	PLA2G1B
SH2 domain binding (GO:0042169)	0.27832	0.411968	0.34299	0.52576	-1.38721	1.77423	SQSTM1
RNA polymerase II carboxy-terminal domain kinase activity (GO:0008353)	0.175711	0.322317	0.225016	0.434063	-1.00987	1.75607	GTF2H1
lipoprotein particle receptor binding (GO:0070325)	0.269543	0.409103	0.333048	0.521368	-1.33511	1.75036	HSP90B1
nucleotide kinase activity (GO:0019201)	0.251669	0.387881	0.312712	0.494714	-1.2537	1.72966	DTYMK
acetyltransferase activity (GO:0016407)	0.26066	0.397639	0.322956	0.50823	-1.27211	1.71041	DBT
transcription coactivator activity (GO:0003713)	0.140242	0.298019	0.283479	0.476083	-0.869353	1.70774	SNW1;CCNE1;SUB1;JADE1;ARID5B;PARK7
phosphatase binding (GO:0019902)	0.126936	0.291954	0.209245	0.41684	-0.821022	1.69465	VCP;WNK1;HSP90B1
transmembrane receptor protein serine/threonine kinase binding (GO:0070696)	0.18561	0.330342	0.236559	0.442069	-1.00125	1.68621	TDGF1
substrate-specific channel activity (GO:0022838)	0.286992	0.416556	0.352786	0.530065	-1.34161	1.67473	AQP3
ATP-dependent RNA helicase activity (GO:0004004)	0.196442	0.339515	0.27949	0.476083	-1.00974	1.64324	EIF4A2;DHX36
transition metal ion binding (GO:0046914)	0.109917	0.28342	0.262068	0.469211	-0.73212	1.61654	MDM2;S100A13;TIMM13;CALR;PARK7;CRIP1;ATOX1;SOD1
cyclin-dependent protein serine/threonine kinase regulator activity (GO:0016538)	0.286992	0.416556	0.352786	0.530065	-1.26474	1.57877	CDKN1A
activating transcription factor binding (GO:0033613)	0.200808	0.341145	0.285013	0.476083	-0.967802	1.55372	PTMA;TBX3
tumor necrosis factor receptor superfamily binding (GO:0032813)	0.27832	0.411968	0.34299	0.52576	-1.20863	1.54582	FEM1B
carboxy-lyase activity (GO:0016831)	0.27832	0.411968	0.34299	0.52576	-1.19593	1.52957	PAICS
RNA-dependent ATPase activity (GO:0008186)	0.200808	0.341145	0.285013	0.476083	-0.932999	1.49784	EIF4A2;DHX36
RNA helicase activity (GO:0003724)	0.196442	0.339515	0.27949	0.476083	-0.914744	1.48865	EIF4A2;DHX36
sequence-specific double-stranded DNA binding (GO:1990837)	0.154602	0.308012	0.24851	0.455856	-0.752151	1.40419	DDIT3;CRIP1;HSPD1
actin binding (GO:0003779)	0.192886	0.339515	0.344645	0.52576	-0.836214	1.37612	TMSB4X;CFL1;ALDOA;PFN1;TMSB10
phospholipase C activity (GO:0004629)	0.286992	0.416556	0.352786	0.530065	-1.08313	1.35207	PDIA3
RNA polymerase II repressing transcription factor binding (GO:0001103)	0.29556	0.424867	0.362435	0.541841	-1.10796	1.35048	SP1
magnesium ion binding (GO:0000287)	0.199134	0.341145	0.309126	0.494714	-0.784886	1.26663	DUT;DCTPP1;NME1
protein kinase binding (GO:0019901)	0.143947	0.299594	0.337412	0.525449	-0.65306	1.26583	CDKN1A;HINT1;HSP90AA1;CCND1;PARP1;WNK1;RCC2;CALM1;SQSTM1
RNA polymerase II transcription factor binding (GO:0001085)	0.180945	0.329895	0.284728	0.476083	-0.685148	1.1713	SPEN;SP1;TBX3
phosphoric diester hydrolase activity (GO:0008081)	0.336886	0.464189	0.408581	0.578984	-1.06702	1.16093	PDIA3
zinc ion binding (GO:0008270)	0.158245	0.309637	0.311971	0.494714	-0.627355	1.1566	MDM2;S100A13;TIMM13;CALR;CRIP1;SOD1
ligand-gated channel activity (GO:0022834)	0.320654	0.448016	0.390535	0.561394	-1.00995	1.14871	CALM1
peptidase inhibitor activity (GO:0030414)	0.360514	0.479083	0.434658	0.596159	-1.11396	1.13649	PTTG1
ubiquitin-like protein conjugating enzyme binding (GO:0044390)	0.352733	0.479083	0.426095	0.596159	-1.08503	1.13065	PARK7
telomeric DNA binding (GO:0042162)	0.328819	0.455713	0.399625	0.568991	-1.0126	1.12627	NCL
protein serine/threonine kinase inhibitor activity (GO:0030291)	0.312389	0.444783	0.381308	0.556152	-0.950545	1.10596	CDKN1A
ATP-dependent helicase activity (GO:0008026)	0.276094	0.411968	0.377506	0.55603	-0.84495	1.08746	EIF4A2;DHX36
deoxyribonuclease activity (GO:0004536)	0.312389	0.444783	0.381308	0.556152	-0.928914	1.0808	NME1
protein kinase activity (GO:0004672)	0.166746	0.309671	0.37553	0.555859	-0.575635	1.03113	CDKN1A;HSP90AA1;WNK1;PLK2;TLK2;GTF2H1;SGK1;SQSTM1;MAP4K4
ATP-dependent microtubule motor activity, plus-end-directed (GO:0008574)	0.320654	0.448016	0.390535	0.561394	-0.88911	1.01127	DYNLL1
exonuclease activity (GO:0004527)	0.360514	0.479083	0.434658	0.596159	-0.97212	0.991781	REXO2
helicase activity (GO:0004386)	0.344857	0.472992	0.417403	0.588696	-0.866121	0.922094	EIF4A2
receptor tyrosine kinase binding (GO:0030971)	0.383303	0.50047	0.459592	0.616224	-0.893016	0.85634	SQSTM1
RNA polymerase II regulatory region DNA binding (GO:0001012)	0.224939	0.363549	0.367253	0.546312	-0.563679	0.840969	PARP1;SP1;ARID5B;VEZF1
hormone receptor binding (GO:0051427)	0.390718	0.501394	0.467657	0.618681	-0.88145	0.828359	SNW1
histone deacetylase activity (GO:0004407)	0.390718	0.501394	0.467657	0.618681	-0.875571	0.822834	MIER1
translation initiation factor activity (GO:0003743)	0.360514	0.479083	0.434658	0.596159	-0.795079	0.811159	EIF5
protein serine/threonine kinase activator activity (GO:0043539)	0.320654	0.448016	0.390535	0.561394	-0.701199	0.797539	CALM1
single-stranded RNA binding (GO:0003727)	0.426483	0.53355	0.506226	0.65242	-0.903926	0.77031	FXR1
core promoter binding (GO:0001047)	0.329211	0.455713	0.439824	0.600491	-0.689442	0.766009	SP1;DHX36
hydro-lyase activity (GO:0016836)	0.426483	0.53355	0.506226	0.65242	-0.844823	0.719943	PARK7
transcriptional activator activity, RNA polymerase II transcription regulatory region sequence-specific binding (GO:0001228)	0.258082	0.395726	0.433272	0.596159	-0.530261	0.718227	KLF6;PARP1;SP1;DDIT3;VEZF1
nucleoside-triphosphatase activity (GO:0017111)	0.250288	0.387881	0.463374	0.618521	-0.513809	0.7117	EIF4A2;HSP90AA1;VCP;EIF5;HSPA5;ATP5J2;HSPD1
transcriptional repressor activity, RNA polymerase II transcription factor binding (GO:0001191)	0.440197	0.53722	0.520864	0.662716	-0.853459	0.700292	SPEN
regulatory region DNA binding (GO:0000975)	0.28511	0.416556	0.444441	0.604036	-0.528682	0.663433	SP1;DDIT3;DHX36;ARID5B
transcription regulatory region sequence-specific DNA binding (GO:0000976)	0.27632	0.411968	0.456616	0.616224	-0.515506	0.663041	PARP1;SP1;DDIT3;ARID5B;VEZF1
oxidoreductase activity, acting on the CH-OH group of donors, NAD or NADP as acceptor (GO:0016616)	0.289431	0.418067	0.393375	0.56277	-0.518952	0.643417	LDHA;MDH2
RNA polymerase II transcription coactivator activity (GO:0001105)	0.383303	0.50047	0.459592	0.616224	-0.662889	0.635664	JADE1
protein phosphatase regulator activity (GO:0019888)	0.440197	0.53722	0.520864	0.662716	-0.770792	0.632461	CALM1
protein deacetylase activity (GO:0033558)	0.405283	0.517862	0.483432	0.633974	-0.68309	0.616945	MIER1
ATP-dependent microtubule motor activity (GO:1990939)	0.446931	0.543221	0.52802	0.668974	-0.727546	0.585931	DYNLL1
collagen binding (GO:0005518)	0.473069	0.56579	0.555598	0.678056	-0.778641	0.582824	PPIB
potassium channel regulator activity (GO:0015459)	0.412435	0.522535	0.491144	0.641275	-0.656362	0.581324	SGK1
transcriptional activator activity, RNA polymerase II transcription factor binding (GO:0001190)	0.460157	0.554786	0.542015	0.671362	-0.739726	0.574166	JADE1
carboxylic ester hydrolase activity (GO:0052689)	0.355404	0.479083	0.469701	0.618681	-0.525567	0.5437	PLA2G1B;PAFAH1B1
SH3 domain binding (GO:0017124)	0.491862	0.585923	0.575224	0.693516	-0.713784	0.506471	GPX1
snRNA binding (GO:0017069)	0.360514	0.479083	0.434658	0.596159	-0.475946	0.485572	SNRPD3
acetylglucosaminyltransferase activity (GO:0008375)	0.460157	0.554786	0.542015	0.671362	-0.615567	0.477795	HEXA
nuclear hormone receptor binding (GO:0035257)	0.497976	0.588518	0.581573	0.695561	-0.663907	0.462878	SNW1
RNA polymerase II activating transcription factor binding (GO:0001102)	0.440197	0.53722	0.520864	0.662716	-0.557925	0.457796	TBX3
nuclease activity (GO:0004518)	0.515885	0.602537	0.600058	0.711493	-0.679104	0.44948	NME1
phosphotransferase activity, alcohol group as acceptor (GO:0016773)	0.366353	0.484689	0.540319	0.671362	-0.443119	0.444961	PKM;WNK1;ETNK1;GTF2H1
tubulin binding (GO:0015631)	0.369074	0.486137	0.543377	0.671362	-0.4299	0.428506	RCC2;STMN2;ALDOA;PAFAH1B1
protein tyrosine phosphatase activity (GO:0004725)	0.533156	0.610205	0.617732	0.711493	-0.62471	0.392905	CDC14A
protease binding (GO:0002020)	0.419106	0.528746	0.54006	0.671362	-0.445613	0.387518	VCP;PARK7
RNA polymerase II regulatory region sequence-specific DNA binding (GO:0000977)	0.317651	0.448016	0.548397	0.672575	-0.332913	0.381785	KLF6;PARP1;SP1;DDIT3;ARID5B;VEZF1;TBX3
RNA polymerase II core promoter proximal region sequence-specific DNA binding (GO:0000978)	0.388093	0.501394	0.564485	0.683324	-0.397288	0.376038	KLF6;SP1;DDIT3;TBX3
ATPase binding (GO:0051117)	0.538776	0.610205	0.623449	0.711493	-0.588379	0.363886	ATPIF1
transcriptional activator activity, RNA polymerase II core promoter proximal region sequence-specific binding (GO:0001077)	0.353906	0.479083	0.499556	0.649423	-0.348395	0.361886	KLF6;SP1;DDIT3
kinase inhibitor activity (GO:0019210)	0.515885	0.602537	0.600058	0.711493	-0.541189	0.358198	CDKN1A
transferase activity, transferring acyl groups other than amino-acyl groups (GO:0016747)	0.497976	0.588518	0.581573	0.695561	-0.513255	0.357843	DBT
ubiquitin binding (GO:0043130)	0.533156	0.610205	0.617732	0.711493	-0.568676	0.357663	SQSTM1
cysteine-type endopeptidase inhibitor activity (GO:0004869)	0.466652	0.560357	0.548857	0.672575	-0.468278	0.356908	PTTG1
ubiquitin protein ligase activity (GO:0061630)	0.409095	0.520508	0.560869	0.681707	-0.387216	0.346097	UBE2C;MDM2;RLIM
core promoter sequence-specific DNA binding (GO:0001046)	0.591399	0.650104	0.676143	0.751549	-0.65783	0.345535	SP1
protein kinase inhibitor activity (GO:0004860)	0.56059	0.627777	0.645478	0.728294	-0.57786	0.334446	CDKN1A
protein serine/threonine phosphatase activity (GO:0004722)	0.527468	0.610205	0.611929	0.711493	-0.506309	0.323869	CDC14A
cysteine-type peptidase activity (GO:0008234)	0.549815	0.620357	0.634628	0.721498	-0.541128	0.323688	PDIA3
hydrolase activity, acting on carbon-nitrogen (but not peptide) bonds, in linear amides (GO:0016811)	0.601182	0.658438	0.685767	0.759423	-0.621037	0.316019	MIER1
GTP binding (GO:0005525)	0.532252	0.610205	0.657015	0.733013	-0.460733	0.290556	TUBA1B;NME1
growth factor activity (GO:0008083)	0.571108	0.633862	0.656008	0.733013	-0.500893	0.280589	TDGF1
phosphatidylinositol bisphosphate binding (GO:1902936)	0.655175	0.700851	0.737821	0.793555	-0.635237	0.268612	PFN1
ubiquitin-like protein ligase activity (GO:0061659)	0.389743	0.501394	0.539737	0.671362	-0.283959	0.267565	UBE2C;MDM2;RLIM
methyltransferase activity (GO:0008168)	0.56059	0.627777	0.645478	0.728294	-0.461782	0.267264	GCSH
RNA polymerase II transcription cofactor activity (GO:0001104)	0.642401	0.693422	0.725672	0.786145	-0.562178	0.248788	JADE1
kinase activity (GO:0016301)	0.436564	0.53722	0.616232	0.711493	-0.289339	0.23981	WNK1;ETNK1;GTF2H1;MAP4K4
purine ribonucleoside binding (GO:0032550)	0.574504	0.633862	0.69801	0.767298	-0.397598	0.220368	TUBA1B;NME1
core promoter proximal region sequence-specific DNA binding (GO:0000987)	0.431223	0.53722	0.610672	0.711493	-0.25399	0.213638	KLF6;SP1;DDIT3;TBX3
ligand-gated ion channel activity (GO:0015276)	0.565881	0.631337	0.650782	0.731519	-0.372543	0.212115	CALM1
transcription factor activity, RNA polymerase II core promoter proximal region sequence-specific binding (GO:0000982)	0.436564	0.53722	0.616232	0.711493	-0.248237	0.205744	KLF6;SP1;DDIT3;TBX3
small GTPase binding (GO:0031267)	0.538776	0.610205	0.623449	0.711493	-0.29886	0.184831	RCC2
phosphatidylinositol binding (GO:0035091)	0.70548	0.734977	0.784575	0.823115	-0.447712	0.156196	SNX6
integrin binding (GO:0005178)	0.683241	0.720412	0.764127	0.815978	-0.396605	0.15107	CALR
phosphatidylinositol-4,5-bisphosphate binding (GO:0005546)	0.521711	0.606972	0.606038	0.711493	-0.230058	0.149685	PFN1
hormone activity (GO:0005179)	0.638039	0.691209	0.7215	0.784467	-0.327527	0.147176	TRH
transferase activity, transferring hexosyl groups (GO:0016758)	0.70548	0.734977	0.784575	0.823115	-0.416738	0.14539	HEXA
sequence-specific DNA binding (GO:0043565)	0.514931	0.602537	0.714693	0.779902	-0.212805	0.141243	CHCHD2;SP1;NCL;TBX3;BPTF
cysteine-type endopeptidase activity (GO:0004197)	0.629156	0.684064	0.712964	0.779902	-0.299656	0.138853	PDIA3
transcriptional repressor activity, RNA polymerase II core promoter proximal region sequence-specific binding (GO:0001078)	0.694562	0.728681	0.774581	0.818374	-0.300597	0.10956	TBX3
microtubule binding (GO:0008017)	0.684271	0.720412	0.797274	0.83061	-0.28211	0.107033	RCC2;PAFAH1B1
UDP-glycosyltransferase activity (GO:0008194)	0.538776	0.610205	0.623449	0.711493	-0.159827	0.0988455	HEXA
phosphoprotein phosphatase activity (GO:0004721)	0.80979	0.825899	0.875098	0.896302	-0.363692	0.0767318	CDC14A
transcriptional repressor activity, RNA polymerase II transcription regulatory region sequence-specific binding (GO:0001227)	0.574504	0.633862	0.69801	0.767298	-0.136762	0.0757998	ARID5B;TBX3
protein tyrosine kinase activity (GO:0004713)	0.833603	0.844906	0.894297	0.909506	-0.414429	0.0754251	HSP90AA1
cytokine activity (GO:0005125)	0.849034	0.857639	0.906388	0.915575	-0.455088	0.0744777	MIF
transcription regulatory region DNA binding (GO:0044212)	0.661621	0.704003	0.82003	0.848405	-0.160367	0.0662416	SP1;DDIT3;DHX36;ARID5B
phosphatase activity (GO:0016791)	0.719435	0.746913	0.797218	0.83061	-0.175246	0.0577066	CDC14A
guanyl ribonucleotide binding (GO:0032561)	0.610744	0.666469	0.731967	0.790101	-0.0935863	0.0461452	TUBA1B;NME1
ubiquitin-protein transferase activity (GO:0004842)	0.74187	0.765326	0.878316	0.896302	-0.130597	0.0389939	FEM1B;UBE2C;MDM2;RLIM
actin filament binding (GO:0051015)	0.787805	0.809462	0.85684	0.883432	-0.160661	0.0383184	CFL1
endopeptidase inhibitor activity (GO:0004866)	0.742289	0.765326	0.817593	0.848405	-0.0932286	0.0277836	PTTG1
endopeptidase activity (GO:0004175)	0.801898	0.821121	0.905379	0.915575	-0.11012	0.0243116	PDIA3;PSMB3;PSMA7
GTPase activity (GO:0003924)	0.933285	0.93957	0.96627	0.972777	-0.238353	0.0164569	EIF5
ion channel activity (GO:0005216)	0.679376	0.720331	0.760536	0.815055	-0.0347874	0.0134481	CALM1
cytokine receptor binding (GO:0005126)	0.812088	0.825899	0.876978	0.896302	-0.0190695	0.00396925	MIF
GTPase regulator activity (GO:0030695)	0.965101	0.965101	0.985021	0.985021	0.371712	-0.0132042	RANBP1
Ras GTPase binding (GO:0017016)	0.653414	0.700851	0.770469	0.818374	0.0349056	-0.0148539	RANBP1;YBX3
GTPase activator activity (GO:0005096)	0.952031	0.955226	0.977683	0.980964	0.481241	-0.0236565	RANBP1
peptidase activity, acting on L-amino acid peptides (GO:0070011)	0.656315	0.700851	0.773027	0.818374	0.160741	-0.0676902	PSMB3;PSMA7

## Sheet: Cluster3-Cellular Component
Term	P-value	Adjusted P-value	Old P-value	Old Adjusted P-value	Z-score	Combined Score	Genes
mitochondrial proton-transporting ATP synthase complex (GO:0005753)	0.000149661	0.00261906	0.00112523	0.0246145	-8.38314	73.8315	ATPIF1;ATP5G3;ATP5G1;ATP5J2
cytosolic large ribosomal subunit (GO:0022625)	3.8961e-11	3.40909e-09	1.42466e-08	1.26199e-06	-2.21263	53.0333	RPL39L;RPL41;RPL36AL;RPLP1;RPL22;RPL37A;RPLP0;NHP2;RPL14;RPLP2;RPL37;RPL39
cytosolic part (GO:0044445)	9.82669e-11	4.29918e-09	5.77813e-08	2.52793e-06	-1.60266	36.9307	CCT3;RPL39L;RPL41;RPS9;RPLP1;MRPS12;RPL22;RPLP0;RPL36AL;RPL37A;NHP2;RPL14;RPLP2;RPL37;RPL39;RPS21
large ribosomal subunit (GO:0015934)	6.52283e-11	3.80498e-09	2.16341e-08	1.26199e-06	-1.51984	35.6451	RPL39L;RPL41;RPL36AL;RPLP1;RPL22;RPL37A;RPLP0;NHP2;RPL14;RPLP2;RPL37;RPL39
mitochondrion (GO:0005739)	7.12229e-09	2.07733e-07	5.06738e-05	0.00147799	-1.7719	33.241	COX7B;DTYMK;HSP90AB1;NDUFA11;TIMM13;PARK7;ATP5G1;HSPD1;GCSH;CHCHD2;UBB;FAM162A;DBT;VPS35;COX10;GPX1;LIG1;PARP1;MDH2;MRPS25;NDUFA4;NDUFA3;ATPIF1;CHCHD10;COX6C;HSPE1;REXO2;ATP5J2;SOD1;PKM;UQCRQ;TOMM7;SUCLG1;SLC25A5;DCTPP1;TOMM6
cytosolic ribosome (GO:0022626)	2.79519e-11	3.40909e-09	1.68042e-08	1.26199e-06	-1.3405	32.575	RPL39L;RPL41;RPS9;RPLP1;MRPS12;RPL22;RPLP0;RPL36AL;RPL37A;NHP2;RPL14;RPLP2;RPL37;RPL39;RPS21
mitochondrial inner membrane (GO:0005743)	6.35976e-09	2.07733e-07	4.12587e-06	0.000144405	-1.6436	31.02	COX8A;COX7B;NDUFA11;MRPS25;NDUFA4;NDUFA3;MRPS12;TIMM13;UQCR11;UQCR10;COX6C;ATP5G1;COX5A;ATP5J2;COX6B1;HSPD1;MRPL52;UQCRQ;SLC25A5;COX10
mitochondrial proton-transporting ATP synthase complex, coupling factor F(o) (GO:0000276)	0.00382844	0.0203024	0.0123109	0.0742897	-3.91665	21.7973	ATP5G3;ATP5G1
U4 snRNP (GO:0005687)	0.000446529	0.00488391	0.00243758	0.035548	-2.81724	21.7322	SNRPD2;SNRPD3;SNRPF
methylosome (GO:0034709)	0.000446529	0.00488391	0.00243758	0.035548	-2.53389	19.5464	SNRPD2;SNRPD3;SNRPF
cytoplasmic vesicle lumen (GO:0060205)	3.88509e-06	9.71272e-05	0.000154895	0.00387238	-1.47521	18.3787	HSP90AA1;VCP;HSP90AB1;PKM;NME2;CALR;MIF;ALDOA;APRT;HSP90B1
U2-type catalytic step 2 spliceosome (GO:0071007)	0.000433652	0.00488391	0.00270622	0.0364298	-2.06382	15.9807	SNW1;SNRPD2;SNRPD3;SNRPF
U12-type spliceosomal complex (GO:0005689)	0.000330143	0.00481458	0.00215555	0.035548	-1.90959	15.3073	SF3B5;SNRPD2;SNRPD3;SNRPF
endocytic vesicle lumen (GO:0071682)	0.00143452	0.01046	0.00621152	0.0562792	-2.32608	15.2286	HSP90AA1;CALR;HSP90B1
mitochondrial respiratory chain complex IV (GO:0005751)	0.00121876	0.00927316	0.00543292	0.0559271	-2.25577	15.136	COX8A;NDUFA4;COX5A
vacuolar proton-transporting V-type ATPase complex (GO:0016471)	0.00102467	0.00815076	0.00471623	0.0550227	-2.1959	15.1152	ATP6V0B;ATP6V0D1;ATP6V1C1
U1 snRNP (GO:0005685)	0.00222016	0.0143899	0.00893142	0.0601153	-2.40776	14.7119	SNRPD2;SNRPD3;SNRPF
precatalytic spliceosome (GO:0071011)	0.000706793	0.00650994	0.00408239	0.0510298	-1.9475	14.1286	SF3B5;SNRPD2;SNRPD3;NSRP1
ficolin-1-rich granule lumen (GO:1904813)	0.000752028	0.00658024	0.00771829	0.0562792	-1.92712	13.8612	HSP90AA1;VCP;HSP90AB1;PKM;NME2;MIF;ALDOA
U7 snRNP (GO:0005683)	0.00382844	0.0203024	0.0123109	0.0742897	-2.44495	13.6069	SNRPD3;SNRPF
nuclear body (GO:0016604)	6.16834e-05	0.0011994	0.00718956	0.0562792	-1.35151	13.1009	PNISR;RBM39;CDKN1A;H2AFX;JADE1;PARK7;SMC4;CDC14A;SNW1;SON;UBN1;MDM2;SRSF3;SNRPD3;SREK1;NSRP1;SGK1;SRSF6;SQSTM1;NOP10
U2 snRNP (GO:0005686)	0.00222016	0.0143899	0.00893142	0.0601153	-2.09587	12.8062	SF3B5;SNRPD2;SNRPD3
small nucleolar ribonucleoprotein complex (GO:0005732)	0.0102517	0.041722	0.0271422	0.121792	-2.69209	12.3306	NHP2;NOP10
small nuclear ribonucleoprotein complex (GO:0030532)	0.00167281	0.0117096	0.00705336	0.0562792	-1.90795	12.198	SNRPD2;SNRPD3;SNRPF
proton-transporting V-type ATPase complex (GO:0033176)	0.00874321	0.0364301	0.0237907	0.115649	-2.42399	11.4885	ATP6V0D1;ATP6V1D
perinuclear region of cytoplasm (GO:0048471)	0.000701029	0.00650994	0.0187318	0.0993352	-1.56836	11.3909	EIF4A2;VCP;ANP32A;STMN2;PARK7;YBX3;HSP90B1;LAMP1;S100A13;TLK2;CALR;PPIB;PAFAH1B1
focal adhesion (GO:0005925)	2.91432e-05	0.000637507	0.00199736	0.035548	-1.0811	11.2902	PDIA3;RPS9;AHNAK;HSPA5;RPLP1;RPL22;RPLP0;REXO2;HSP90B1;CFL1;RPL37A;RPLP2;CALR;PFN1;PPIB
telomerase holoenzyme complex (GO:0005697)	0.00253073	0.0152717	0.00996967	0.0646182	-1.88224	11.2544	NHP2;SNRPD3;NOP10
nuclear speck (GO:0016607)	0.000263081	0.00418538	0.00747351	0.0562792	-1.30734	10.7764	PNISR;RBM39;SNW1;SON;H2AFX;JADE1;SRSF3;SREK1;NSRP1;SGK1;SRSF6;SMC4
ribosome (GO:0005840)	0.00233714	0.0146071	0.0138423	0.0807469	-1.77575	10.759	RPL41;RPS9;MRPS12;RPL39;RPS21
polysome (GO:0005844)	0.00102278	0.00815076	0.00681768	0.0562792	-1.42223	9.79236	FXR1;RPL41;CALR;RPL39;RPS21
MLL3/4 complex (GO:0044666)	0.00874321	0.0364301	0.0237907	0.115649	-2.03701	9.65437	KMT2C;DPY30
ficolin-1-rich granule (GO:0101002)	0.0004097	0.00488391	0.00661968	0.0562792	-1.19407	9.31381	HSP90AA1;VCP;HSP90AB1;PKM;LAMP1;NME2;MIF;ALDOA;DYNLL1
mitochondrial respiratory chain complex III (GO:0005750)	0.0135847	0.0495275	0.0343713	0.143214	-2.12437	9.13228	UQCRQ;UQCR10
spliceosomal complex (GO:0005681)	0.000479326	0.00493424	0.00526918	0.0559271	-1.19282	9.11685	SF3B5;SNW1;SNRPD2;TRA2B;SNRPD3;SNRPF;NSRP1
mitochondrial respiratory chain complex I (GO:0005747)	0.00348687	0.019684	0.0159803	0.0902111	-1.57907	8.93559	NDUFA11;NDUFA4;NDUFA3;PARK7
polysomal ribosome (GO:0042788)	0.00495257	0.0247629	0.017635	0.0964414	-1.6393	8.70114	RPL41;RPL39;RPS21
Set1C/COMPASS complex (GO:0048188)	0.0118664	0.0451441	0.0306714	0.134187	-1.94236	8.61251	DPY30;BPTF
spliceosomal snRNP complex (GO:0097525)	0.00583026	0.0268499	0.0248687	0.117622	-1.63165	8.39432	SF3B5;SNRPD2;SNRPD3;SNRPF
nuclear cyclin-dependent protein kinase holoenzyme complex (GO:0019908)	0.0173209	0.0606232	0.0422554	0.168061	-1.95518	7.9299	SNW1;HSPD1
endosomal part (GO:0044440)	0.00654776	0.0286464	0.022411	0.115351	-1.45888	7.33618	VPS26A;VPS35;SNX6
nucleoplasm part (GO:0044451)	0.00396285	0.020397	0.0614087	0.228649	-1.27828	7.0699	CDKN1A;SNW1;KMT2C;UBN1;JADE1;MDM2;DPY30;GTF2H1;SNRPD3;TAF3;CDC14A;NOP10
fibrillar center (GO:0001650)	0.00523458	0.0247752	0.0329333	0.140569	-1.27787	6.71199	KLF6;TCOF1;EEF1D;TIMM13;NOLC1;AFF4
nucleolus (GO:0005730)	0.00344957	0.019684	0.0934724	0.30292	-1.15618	6.55498	EIF4A2;CDKN1A;RPS9;PARP1;NOLC1;PA2G4;REXO2;FXR1;KLF6;TCOF1;NCL;SUB1;MDM2;S100A13;ANP32B;LYAR;COX10
U5 snRNP (GO:0005682)	0.0332776	0.101097	0.0742675	0.25484	-1.89309	6.44193	SNRPD2;SNRPD3
NURF complex (GO:0016589)	0.0920788	0.203972	0.145963	0.387024	-2.63085	6.27487	BPTF
Cul5-RING ubiquitin ligase complex (GO:0031466)	0.0810475	0.189111	0.130852	0.374477	-2.47108	6.20914	ELOB
commitment complex (GO:0000243)	0.102978	0.217123	0.160814	0.388382	-2.71159	6.1641	SNRPD3
cyclin-dependent protein kinase activating kinase holoenzyme complex (GO:0019907)	0.0920788	0.203972	0.145963	0.387024	-2.48082	5.91704	HSPD1
elongin complex (GO:0070449)	0.102978	0.217123	0.160814	0.388382	-2.59237	5.89307	ELOB
phagocytic vesicle membrane (GO:0030670)	0.0113467	0.0441262	0.036019	0.146589	-1.31516	5.89036	ATP6V0B;CALR;ATP6V0D1
U2-type spliceosomal complex (GO:0005684)	0.00618175	0.0277386	0.0261522	0.120438	-1.15628	5.88104	SNW1;SNRPD2;SNRPD3;SNRPF
autolysosome (GO:0044754)	0.102978	0.217123	0.160814	0.388382	-2.56626	5.83372	SQSTM1
secretory granule lumen (GO:0034774)	0.00523819	0.0247752	0.0593675	0.227937	-1.02574	5.38694	HSP90AA1;VCP;HSP90AB1;PKM;TMSB4X;NME2;MIF;PA2G4;ALDOA;APRT
cyclin/CDK positive transcription elongation factor complex (GO:0008024)	0.102978	0.217123	0.160814	0.388382	-2.33699	5.31254	SNW1
histone methyltransferase complex (GO:0035097)	0.0221106	0.0730067	0.0641394	0.229069	-1.3401	5.10805	KMT2C;DPY30;BPTF
mitochondrial intermembrane space (GO:0005758)	0.0324782	0.101097	0.0893244	0.294939	-1.46081	5.00647	CHCHD2;CHCHD10;SOD1
cytosolic small ribosomal subunit (GO:0022627)	0.0221106	0.0730067	0.0641394	0.229069	-1.19155	4.54182	RPS9;MRPS12;RPS21
nucleolar part (GO:0044452)	0.0108172	0.0430229	0.0599148	0.227937	-0.994784	4.50301	KLF6;TCOF1;EEF1D;TIMM13;NOLC1;AFF4
phagocytic vesicle (GO:0045335)	0.018482	0.0634185	0.0666602	0.233311	-1.09952	4.38814	PDIA3;ATP6V0B;CALR;ATP6V0D1
zonula adherens (GO:0005915)	0.0810475	0.189111	0.130852	0.374477	-1.70861	4.29325	PLEKHA7
spliceosomal tri-snRNP complex (GO:0097526)	0.0562013	0.144636	0.117352	0.366725	-1.47764	4.25386	SNRPD2;SNRPD3
small ribosomal subunit (GO:0015935)	0.0270272	0.0859956	0.0762676	0.25667	-1.15651	4.17604	RPS9;MRPS12;RPS21
post-mRNA release spliceosomal complex (GO:0071014)	0.113747	0.231463	0.175407	0.403899	-1.85604	4.03462	SNW1
endoplasmic reticulum lumen (GO:0005788)	0.0169267	0.0604526	0.112552	0.358122	-0.916614	3.73874	PDIA3;HSPA5;SPP1;DBI;CALR;PPIB;PDIA6;HSP90B1
mitochondrial envelope (GO:0005740)	0.0519653	0.14014	0.133421	0.374477	-1.25994	3.72586	CHCHD2;CHCHD10;SOD1
primary lysosome (GO:0005766)	0.124388	0.241865	0.189749	0.408346	-1.76925	3.68775	HEXA
lateral element (GO:0000800)	0.124388	0.241865	0.189749	0.408346	-1.73424	3.61476	SYCP3
vacuolar lumen (GO:0005775)	0.0459792	0.12978	0.165045	0.39031	-1.15305	3.55089	HSP90AA1;VCP;SDC4;HEXA;PA2G4
mitochondrial outer membrane translocase complex (GO:0005742)	0.113747	0.231463	0.175407	0.403899	-1.63311	3.55001	TOMM7
ISWI-type complex (GO:0031010)	0.134901	0.259425	0.203843	0.422967	-1.74706	3.49974	BPTF
lysosome (GO:0005764)	0.0135674	0.0495275	0.133758	0.374477	-0.806937	3.4699	HSP90AA1;AHNAK;LAMP1;SDC4;HEXA;DNAJC13;VPS26A;VPS35;ATP6V0D1;ATP6V1D;ATP6V1C1
microtubule organizing center (GO:0005815)	0.0435095	0.124822	0.291069	0.530594	-1.05882	3.31915	RANBP1;RBM39;PLK2;H2AFX;ATP6V0D1;CALM1;DYNLL1;ATP6V1D;CDC14A;PLEKHA7;PAFAH1B1
lytic vacuole membrane (GO:0098852)	0.0231982	0.0751794	0.126265	0.374477	-0.849815	3.19843	AHNAK;LAMP1;DNAJC13;VPS35;ATP6V0D1;ATP6V1D;ATP6V1C1
site of double-strand break (GO:0035861)	0.0658752	0.162368	0.134812	0.374477	-1.16721	3.17482	VCP;H2AFX
azurophil granule (GO:0042582)	0.0392639	0.116461	0.14569	0.387024	-0.948172	3.06966	VCP;LAMP1;HEXA;DNAJC13;PA2G4
secondary lysosome (GO:0005767)	0.155551	0.28959	0.231304	0.449757	-1.64502	3.06102	SQSTM1
ribonucleoprotein granule (GO:0035770)	0.0737345	0.179216	0.179111	0.407071	-1.14834	2.99406	FXR1;NCL;RPLP0
site of DNA damage (GO:0090734)	0.0760559	0.182326	0.152806	0.388382	-1.15119	2.9658	VCP;H2AFX
chromosomal region (GO:0098687)	0.065408	0.162368	0.162011	0.388382	-1.06099	2.89343	RCC2;H2AFX;SYCP3
mitochondrial outer membrane (GO:0005741)	0.0512209	0.14014	0.155704	0.388382	-0.942476	2.80067	UBB;TOMM7;ATP5G3;TOMM6
endocytic vesicle (GO:0030139)	0.0424053	0.123682	0.13341	0.374477	-0.852222	2.69343	PDIA3;HSP90AA1;CALR;HSP90B1
mitochondrial matrix (GO:0005759)	0.0335065	0.101097	0.186216	0.408346	-0.782212	2.65641	GCSH;GPX1;MDH2;DBT;SUCLG1;HSPE1;HSPD1;SOD1
synaptonemal structure (GO:0099086)	0.175711	0.307494	0.257823	0.485151	-1.49885	2.60637	SYCP3
early endosome (GO:0005769)	0.0527008	0.14014	0.207858	0.422967	-0.858994	2.52812	DNAJC13;VPS26A;VPS35;ATP6V0D1;HSPD1;SNX6
cytoplasmic ribonucleoprotein granule (GO:0036464)	0.0555601	0.144636	0.191339	0.408346	-0.831634	2.40366	FXR1;NCL;RPLP0;CNOT8;SQSTM1
lysosomal lumen (GO:0043202)	0.0870536	0.197849	0.20562	0.422967	-0.972849	2.37495	HSP90AA1;SDC4;HEXA
centrosome (GO:0005813)	0.0528527	0.14014	0.304493	0.545956	-0.753669	2.21597	RANBP1;PLK2;H2AFX;ATP6V0D1;CALM1;DYNLL1;ATP6V1D;CDC14A;PLEKHA7;PAFAH1B1
holo TFIIH complex (GO:0005675)	0.145288	0.276363	0.217693	0.437888	-1.13551	2.19044	GTF2H1
chromosome, centromeric region (GO:0000775)	0.120927	0.241865	0.228266	0.449757	-1.02775	2.17118	RCC2;SYCP3
mitotic spindle midzone (GO:1990023)	0.124388	0.241865	0.189749	0.408346	-1.01984	2.12571	RCC2
mitotic spindle (GO:0072686)	0.0825066	0.189982	0.196681	0.414688	-0.846375	2.1116	RCC2;DYNLL1;CDC14A
histone acetyltransferase complex (GO:0000123)	0.242569	0.379014	0.343683	0.557554	-1.47417	2.08811	JADE1
chaperonin-containing T-complex (GO:0005832)	0.155551	0.28959	0.231304	0.449757	-1.00518	1.87042	CCT3
lysosomal membrane (GO:0005765)	0.0630201	0.159834	0.263391	0.490355	-0.671917	1.85738	AHNAK;LAMP1;DNAJC13;VPS35;ATP6V0D1;ATP6V1D;ATP6V1C1
prespliceosome (GO:0071010)	0.251669	0.389753	0.355115	0.564956	-1.30473	1.80006	SNRPD3
anaphase-promoting complex (GO:0005680)	0.233359	0.37466	0.33205	0.557554	-1.23583	1.79835	UBE2C
integral component of mitochondrial outer membrane (GO:0031307)	0.233359	0.37466	0.33205	0.557554	-1.22584	1.78381	TOMM7
Cul2-RING ubiquitin ligase complex (GO:0031462)	0.175711	0.307494	0.257823	0.485151	-0.965798	1.67944	ELOB
U4/U6 x U5 tri-snRNP complex (GO:0046540)	0.269543	0.406638	0.377389	0.584451	-1.20661	1.5819	SNRPD2
calcium channel complex (GO:0034704)	0.26066	0.399241	0.366349	0.577577	-1.08209	1.45491	CALM1
endoplasmic reticulum-Golgi intermediate compartment (GO:0005793)	0.10876	0.226584	0.246868	0.474746	-0.654326	1.45169	HSPA5;CALR;PDIA6
MLL1/2 complex (GO:0044665)	0.286992	0.41763	0.398897	0.591585	-1.14369	1.42767	MGA
cytoplasmic dynein complex (GO:0005868)	0.233359	0.37466	0.33205	0.557554	-0.966143	1.40591	DYNLL1
ficolin-1-rich granule membrane (GO:0101003)	0.170533	0.307494	0.305735	0.545956	-0.777162	1.37466	LAMP1;DYNLL1
mitochondrial small ribosomal subunit (GO:0005763)	0.286992	0.41763	0.398897	0.591585	-1.06883	1.33422	MRPS12
PML body (GO:0016605)	0.174812	0.307494	0.312164	0.546286	-0.727447	1.2687	PARK7;SQSTM1
azurophil granule membrane (GO:0035577)	0.15781	0.290703	0.286393	0.527566	-0.675138	1.24655	LAMP1;DNAJC13
synaptonemal complex (GO:0000795)	0.29556	0.41763	0.409373	0.597003	-0.999138	1.21783	SYCP3
autophagosome (GO:0005776)	0.183419	0.317806	0.324982	0.557554	-0.715974	1.21428	ATG14;SQSTM1
intrinsic component of mitochondrial outer membrane (GO:0031306)	0.242569	0.379014	0.343683	0.557554	-0.848138	1.20136	TOMM7
platelet alpha granule lumen (GO:0031093)	0.196442	0.33376	0.344091	0.557554	-0.721806	1.17466	TMSB4X;ALDOA
MLL1 complex (GO:0071339)	0.286992	0.41763	0.398897	0.591585	-0.908695	1.13433	MGA
vacuole (GO:0005773)	0.174812	0.307494	0.312164	0.546286	-0.620303	1.08184	ATG14;SQSTM1
early endosome membrane (GO:0031901)	0.222792	0.367817	0.381756	0.585089	-0.717055	1.07667	DNAJC13;SNX6
rough endoplasmic reticulum (GO:0005791)	0.29556	0.41763	0.409373	0.597003	-0.814812	0.993162	SEC62
P-body (GO:0000932)	0.200808	0.337898	0.350423	0.562606	-0.596164	0.957085	CNOT8;SQSTM1
chromosome, telomeric region (GO:0000781)	0.189984	0.325952	0.384487	0.585089	-0.540729	0.898052	PARP1;H2AFX;NHP2
transcriptionally active chromatin (GO:0035327)	0.242569	0.379014	0.343683	0.557554	-0.620231	0.878537	AFF4
spindle midzone (GO:0051233)	0.312389	0.430458	0.429784	0.616494	-0.727934	0.846954	RCC2
bicellular tight junction (GO:0005923)	0.218378	0.363963	0.375538	0.584451	-0.554462	0.843629	UBN1;YBX3
aggresome (GO:0016235)	0.398045	0.51219	0.530138	0.719179	-0.839255	0.773114	SQSTM1
azurophil granule lumen (GO:0035578)	0.298307	0.41763	0.482811	0.670571	-0.552952	0.668868	VCP;PA2G4
integral component of lumenal side of endoplasmic reticulum membrane (GO:0071556)	0.304025	0.422257	0.419668	0.606958	-0.519491	0.618529	CALR
nuclear ubiquitin ligase complex (GO:0000152)	0.398045	0.51219	0.530138	0.719179	-0.660903	0.608818	UBE2C
intermediate filament (GO:0005882)	0.433381	0.546344	0.569749	0.748305	-0.676897	0.565979	TLK2
transcription factor TFIID complex (GO:0005669)	0.352733	0.474833	0.477797	0.670571	-0.532785	0.555186	TAF3
platelet alpha granule (GO:0031091)	0.298307	0.41763	0.482811	0.670571	-0.454628	0.549932	TMSB4X;ALDOA
recycling endosome membrane (GO:0055038)	0.440197	0.546344	0.577264	0.748305	-0.568278	0.466291	PDIA3
mitochondrial large ribosomal subunit (GO:0005762)	0.473069	0.570945	0.612925	0.77726	-0.513969	0.384713	MRPL52
integral component of mitochondrial membrane (GO:0032592)	0.497976	0.582648	0.639289	0.782347	-0.529719	0.369322	TOMM7
nuclear chromosome, telomeric region (GO:0000784)	0.372665	0.494064	0.57316	0.748305	-0.356659	0.352049	PARP1;NHP2
membrane raft (GO:0045121)	0.423244	0.54064	0.629768	0.782347	-0.39076	0.335978	AHNAK;TDGF1
spindle (GO:0005819)	0.389743	0.508992	0.645776	0.784797	-0.316761	0.298474	CALM1;DYNLL1;CDC14A
cation channel complex (GO:0034703)	0.549815	0.620758	0.692265	0.818556	-0.329827	0.197294	CALM1
intermediate filament cytoskeleton (GO:0045111)	0.581376	0.64803	0.723211	0.822199	-0.303691	0.164709	TLK2
tertiary granule (GO:0070820)	0.317837	0.434542	0.562115	0.748305	-0.127471	0.14611	LAMP1;ALDOA;DYNLL1
chromatin (GO:0000785)	0.285539	0.41763	0.606964	0.775319	-0.10388	0.130201	SP1;H2AFX;PARK7;AFF4;BPTF
lipid droplet (GO:0005811)	0.544329	0.618555	0.686783	0.817599	-0.205968	0.12527	VCP
coated vesicle (GO:0030135)	0.581376	0.64803	0.723211	0.822199	-0.226273	0.122721	HSPD1
RNA polymerase II transcription factor complex (GO:0090575)	0.262358	0.399241	0.490001	0.675198	-0.0854734	0.114367	DDIT3;GTF2H1;TAF3
nuclear periphery (GO:0034399)	0.615422	0.673118	0.755426	0.836706	-0.233075	0.113145	SNW1
spindle pole (GO:0000922)	0.372665	0.494064	0.57316	0.748305	-0.112169	0.110719	CALM1;CDC14A
DNA-directed RNA polymerase II, holoenzyme (GO:0016591)	0.298307	0.41763	0.482811	0.670571	-0.0726119	0.0878336	GTF2H1;TAF3
spindle microtubule (GO:0005876)	0.453584	0.558994	0.591904	0.761641	-0.105429	0.0833494	CALM1
microtubule (GO:0005874)	0.465894	0.56619	0.723535	0.822199	-0.0959404	0.073279	CCT3;TUBA1B;CALM1
nuclear chromosome part (GO:0044454)	0.33352	0.45245	0.6984	0.820269	-0.0630462	0.069228	PARP1;SP1;H2AFX;NHP2;SYCP3;BPTF
Golgi lumen (GO:0005796)	0.698245	0.731694	0.828356	0.879013	-0.150112	0.0539178	SDC4
tertiary granule membrane (GO:0070821)	0.591399	0.65091	0.732823	0.82738	-0.100012	0.0525326	DYNLL1
ruffle membrane (GO:0032587)	0.479409	0.572924	0.61969	0.780186	-0.038467	0.028281	NME1
centriole (GO:0005814)	0.687061	0.726836	0.818983	0.879013	-0.0747673	0.0280626	PLK2
microtubule organizing center part (GO:0044450)	0.785211	0.813088	0.895592	0.932908	-0.00669731	0.00161943	PLK2
integral component of plasma membrane (GO:0005887)	0.999998	0.999998	1	1	1.24996	-2.70971e-06	LAMP1;SDC4;SLC25A5
Golgi subcompartment (GO:0098791)	0.997165	0.999998	0.999828	1	0.26077	-0.000740272	DPY30
recycling endosome (GO:0055037)	0.766147	0.79807	0.881757	0.923997	0.0201548	-0.00536885	PDIA3
actin cytoskeleton (GO:0015629)	0.871768	0.892161	0.967701	0.98458	0.141225	-0.0193805	AHNAK;ALDOA
trans-Golgi network (GO:0005802)	0.895233	0.910847	0.963566	0.98458	0.238276	-0.0263704	DPY30
specific granule membrane (GO:0035579)	0.671503	0.720769	0.805691	0.879013	0.0705584	-0.028099	ATP6V1D
specific granule (GO:0042581)	0.857946	0.88318	0.943032	0.970768	0.2153	-0.0329869	ATP6V1D
tertiary granule lumen (GO:1904724)	0.491862	0.581593	0.63287	0.782347	0.0577884	-0.0410042	ALDOA
cytoplasmic vesicle (GO:0031410)	0.481256	0.572924	0.73796	0.82784	0.0586939	-0.0429261	VPS35;HSPD1;SOD1
cullin-RING ubiquitin ligase complex (GO:0031461)	0.644594	0.700645	0.833807	0.879013	0.126144	-0.0553943	UBE2C;ELOB
integral component of endoplasmic reticulum membrane (GO:0030176)	0.459773	0.562659	0.668298	0.801042	0.086407	-0.0671402	HSPA5;CALR
dendrite (GO:0030425)	0.927334	0.938055	0.978728	0.990043	1.16185	-0.0876515	PLK2
peroxisome (GO:0005777)	0.675463	0.720769	0.809102	0.879013	0.316427	-0.124152	SOD1
polymeric cytoskeletal fiber (GO:0099513)	0.499412	0.582648	0.754485	0.836706	0.232528	-0.161449	CCT3;TUBA1B;TLK2
microbody (GO:0042579)	0.675463	0.720769	0.809102	0.879013	0.426383	-0.167294	SOD1
late endosome (GO:0005770)	0.506322	0.586797	0.714592	0.822199	0.334482	-0.227643	LAMP1;VPS35
lytic vacuole (GO:0000323)	0.380008	0.500011	0.635055	0.782347	0.236365	-0.228698	LAMP1;VPS26A;VPS35
microtubule cytoskeleton (GO:0015630)	0.689456	0.726836	0.915546	0.94805	0.718008	-0.266994	CCT3;RBM39;TUBA1B;RELL1
endoplasmic reticulum-Golgi intermediate compartment membrane (GO:0033116)	0.440197	0.546344	0.577264	0.748305	0.342452	-0.280993	CALR
nuclear matrix (GO:0016363)	0.515885	0.590064	0.657884	0.793998	0.42708	-0.282672	SNW1
cytoskeleton (GO:0005856)	0.43485	0.546344	0.819144	0.879013	0.378343	-0.315067	CCT3;RBM39;HINT1;TUBA1B;AHNAK;RELL1;ALDOA
axon (GO:0030424)	0.510083	0.587267	0.718196	0.822199	0.653244	-0.439752	FXR1;PARK7
nuclear chromatin (GO:0000790)	0.590341	0.65091	0.828971	0.879013	0.898891	-0.473765	SP1;H2AFX;BPTF

## Sheet: Cluster2-Biological Process
Term	P-value	Adjusted P-value	Old P-value	Old Adjusted P-value	Z-score	Combined Score	Genes
regulation of intrinsic apoptotic signaling pathway by p53 class mediator (GO:1902253)	2.36329e-05	0.00199698	0.000114409	0.00902303	-3.31861	35.3527	RPS7;UBB;MDM2
mRNA splicing, via spliceosome (GO:0000398)	1.73904e-09	1.02864e-06	2.06255e-08	1.22e-05	-1.7505	35.3074	SCAF11;HNRNPU;UPF3B;PRPF4B;GTF2F1;WBP11;HNRNPM;SYNCRIP;SFPQ;SYF2;TRA2B;HNRNPD;DHX16;POLR2F;SNRNP27;HNRNPC
mRNA processing (GO:0006397)	7.16037e-10	8.47072e-07	9.59038e-09	1.13454e-05	-1.47827	31.1283	SCAF11;HNRNPU;UPF3B;PRPF4B;GTF2F1;WBP11;THOC6;HNRNPM;SYNCRIP;SFPQ;SYF2;TRA2B;HNRNPD;DHX16;POLR2F;SNRNP27;HNRNPC
RNA splicing, via transesterification reactions with bulged adenosine as nucleophile (GO:0000377)	3.52138e-09	1.3886e-06	3.7531e-08	1.47997e-05	-1.26693	24.66	HNRNPU;UPF3B;PRPF4B;GTF2F1;WBP11;HNRNPM;SYNCRIP;SFPQ;SYF2;TRA2B;HNRNPD;DHX16;POLR2F;SNRNP27;HNRNPC
chromatin remodeling (GO:0006338)	1.0048e-05	0.00132075	3.83937e-05	0.00504664	-2.05271	23.6228	ANP32A;ATRX;ANP32E;UBTF;ANP32B;DEK;HNRNPC;BPTF
ncRNA processing (GO:0034470)	6.51293e-06	0.00110068	3.04434e-05	0.00490768	-1.92262	22.9594	NOP58;RPL18A;RPS7;RPS8;UTP3;SARS;RPS11;LYAR;UBA52;WDR43;RPL7
regulation of mitotic cell cycle phase transition (GO:1901990)	6.3948e-06	0.00110068	2.82481e-05	0.00490768	-1.91301	22.8796	CDC20;YWHAE;CENPE;TPX2;CENPF;UBB;HMMR;UBA52;HAUS2;TUBA4A
rRNA metabolic process (GO:0016072)	1.32352e-05	0.00155126	5.5194e-05	0.00621076	-1.93357	21.7191	NOP58;RPL18A;RPS7;RPS8;UTP3;RPS11;LYAR;UBA52;WDR43;RPL7
protein targeting to ER (GO:0045047)	2.75091e-05	0.00203396	9.16011e-05	0.00774029	-2.06736	21.7094	PMM1;RPL18A;RPS7;RPS8;RPS11;UBA52;RPL7
regulation of G2/M transition of mitotic cell cycle (GO:0010389)	8.0976e-06	0.00119743	3.3188e-05	0.00490768	-1.76306	20.6701	YWHAE;TPX2;CENPF;CCND1;UBB;HMMR;UBA52;HAUS2;TUBA4A
RNA metabolic process (GO:0016070)	5.73404e-05	0.00357019	0.000201023	0.0121933	-1.97787	19.3168	HNRNPM;RBM39;SYNCRIP;HNRNPD;DHX16;HNRNPU;POLR2F;HNRNPC;GTF2F1
nuclear-transcribed mRNA catabolic process, nonsense-mediated decay (GO:0000184)	6.86755e-05	0.00386872	0.000211179	0.0121933	-1.97787	18.9601	RPL18A;RPS7;RPS8;UPF3B;RPS11;UBA52;RPL7
RNA splicing (GO:0008380)	4.84876e-05	0.00318671	0.000153585	0.0106877	-1.86669	18.5441	SYNCRIP;SFPQ;SCAF11;TRA2B;DHX16;PRPF4B;HNRNPC
regulation of mRNA stability (GO:0043488)	2.0517e-05	0.00186704	7.37119e-05	0.00670779	-1.70517	18.406	FXR1;SET;ANP32A;UBB;HNRNPD;HNRNPU;HSPB1;UBA52
cellular macromolecule biosynthetic process (GO:0034645)	2.69614e-05	0.00203396	0.000127357	0.00941649	-1.74363	18.3449	SET;RPS7;RPS8;SARS;TARS;PTMS;RPL7;FAM111A;RPL18A;PCLAF;POLR2F;RPS11;BPTF
rRNA processing (GO:0006364)	1.44242e-05	0.00155126	5.97495e-05	0.00621076	-1.61044	17.951	NOP58;RPL18A;RPS7;RPS8;UTP3;RPS11;LYAR;UBA52;WDR43;RPL7
gene expression (GO:0010467)	9.10256e-07	0.000269208	6.62577e-06	0.00195957	-1.25571	17.4663	RBM39;RPS7;RPS8;HNRNPU;SARS;TARS;UPF3B;RPL7;THOC6;SYNCRIP;RPL18A;HNRNPD;DHX16;POLR2F;RPS11;BPTF
kinetochore assembly (GO:0051382)	0.00272148	0.0487806	0.00523149	0.0952131	-2.75795	16.2901	CENPE;CENPF
SRP-dependent cotranslational protein targeting to membrane (GO:0006614)	0.000153193	0.00697027	0.000417205	0.0189828	-1.81358	15.9301	RPL18A;RPS7;RPS8;RPS11;UBA52;RPL7
nucleobase-containing small molecule interconversion (GO:0015949)	0.000179523	0.00786575	0.000454645	0.0199202	-1.83381	15.817	RRM1;RRM2;NME2;NME4
protein-DNA complex assembly (GO:0065004)	1.82171e-05	0.0017959	6.30001e-05	0.00621076	-1.41553	15.4479	UBB;ATRX;H2AFX;ANP32E;ERCC5;ANP32B;UBA52
positive regulation of chromosome organization (GO:2001252)	0.000706847	0.0220053	0.00153376	0.0518411	-2.07576	15.059	ATRX;HNRNPU;GNL3
cellular response to UV-B (GO:0071493)	0.00272148	0.0487806	0.00523149	0.0952131	-2.53057	14.947	CDKN1A;CRIP1
maturation of LSU-rRNA from tricistronic rRNA transcript (SSU-rRNA, 5.8S rRNA, LSU-rRNA) (GO:0000463)	0.00338199	0.054881	0.00623645	0.102468	-2.59853	14.7838	RPL7L1;RPL7
positive regulation of intrinsic apoptotic signaling pathway (GO:2001244)	0.000228333	0.00931443	0.000560898	0.0228808	-1.74903	14.6651	SFPQ;RPS7;UBB;DNM1L
ribosome biogenesis (GO:0042254)	6.24638e-06	0.00110068	2.92924e-05	0.00490768	-1.20947	14.4937	NOP58;RPL18A;RPS7;RPS8;UTP3;RPS11;LYAR;UBA52;WDR43;GNL3;RPL7
nuclear transport (GO:0051169)	0.00107677	0.0259963	0.0022025	0.0595186	-2.11139	14.4288	SET;ANP32A;ANP32E
nucleic acid metabolic process (GO:0090304)	8.52978e-05	0.0045867	0.000244745	0.0131606	-1.53489	14.3809	HNRNPM;HNRNPD;HNRNPU;POLR2F;HNRNPC;GTF2F1
positive regulation of epidermal growth factor receptor signaling pathway (GO:0045742)	0.0023583	0.044998	0.00439013	0.0865587	-2.35533	14.2493	UBB;FBXW7;UBA52
protein localization to microtubule (GO:0035372)	0.00272148	0.0487806	0.00523149	0.0952131	-2.39551	14.1492	HNRNPU;KIF20B
positive regulation of transcription from RNA polymerase I promoter (GO:0045943)	0.000942459	0.0249157	0.00196276	0.0566328	-1.97391	13.7523	NCL;UBTF;WDR43
nucleosome organization (GO:0034728)	0.000740137	0.0224508	0.00167114	0.0527365	-1.8642	13.4384	SET;ATRX;H2AFX;ANP32E;ANP32B
regulation of DNA endoreduplication (GO:0032875)	0.00212915	0.0427532	0.0043087	0.0865587	-2.16485	13.3182	FBXW7;SMC3
viral transcription (GO:0019083)	0.000550555	0.0186088	0.00134969	0.0469611	-1.75357	13.1598	RPL18A;RPS7;RPS8;RPS11;UBA52;RPL7
positive regulation of protein localization to chromosome, telomeric region (GO:1904816)	0.00490257	0.0674388	0.00848602	0.120951	-2.46789	13.1242	CCT6A;GNL3
entry of bacterium into host cell (GO:0035635)	0.00576019	0.0725513	0.00972725	0.126435	-2.5187	12.9884	UBB;UBA52
DNA damage response, signal transduction by p53 class mediator (GO:0030330)	9.77588e-05	0.00481869	0.000277037	0.0136556	-1.40583	12.9801	BTG2;CDKN1A;UBB;ATRX;MDM2;UBA52
kinetochore organization (GO:0051383)	0.00576019	0.0725513	0.00972725	0.126435	-2.50835	12.935	CENPE;CENPF
negative regulation of cell cycle process (GO:0010948)	9.13594e-05	0.00469905	0.000260498	0.0133987	-1.38585	12.8894	SUZ12;RRM2;CCND1;FBXW7;MDM2;SMC3
peptide biosynthetic process (GO:0043043)	0.000991366	0.0249157	0.00247339	0.0597147	-1.85821	12.8522	RPL18A;RPS7;RPS8;SARS;TARS;RPS11;RPL7
ATP-dependent chromatin remodeling (GO:0043044)	0.00259403	0.0487102	0.0047798	0.0912016	-2.15201	12.8142	ANP32E;ANP32B;HNRNPC
regulation of DNA repair (GO:0006282)	0.000353496	0.0130683	0.000824397	0.0304769	-1.60817	12.7812	TRIM28;H2AFX;UBR5;DEK
nucleotide-excision repair, DNA incision, 5'-to lesion (GO:0006296)	0.00465178	0.0658174	0.00808949	0.116706	-2.37797	12.7709	UBB;ERCC5;UBA52
RNA processing (GO:0006396)	6.21223e-05	0.00367454	0.000216449	0.0121933	-1.30313	12.6227	RBM39;SYNCRIP;SFPQ;SCAF11;HNRNPD;DHX16;HNRNPU;PRPF4B;HNRNPC
regulation of autophagy of mitochondrion (GO:1903146)	0.00192787	0.0400117	0.00367035	0.0796517	-1.99145	12.4492	FBXW7;DNM1L;WBP11
alternative mRNA splicing, via spliceosome (GO:0000380)	0.00576019	0.0725513	0.00972725	0.126435	-2.41193	12.4378	HNRNPM;SFPQ
nucleosome assembly (GO:0006334)	0.00213224	0.0427532	0.00417077	0.0865587	-2.0017	12.3116	ATRX;H2AFX;ANP32E;ANP32B
regulation of necrotic cell death (GO:0010939)	0.0066811	0.0759975	0.0110439	0.134217	-2.42616	12.1513	UBB;UBA52
cell cycle G2/M phase transition (GO:0044839)	0.00101095	0.0249157	0.00236489	0.0595247	-1.75903	12.1318	YWHAE;CDKN1A;UBB;UBA52;HAUS2;TUBA4A
translation (GO:0006412)	4.68932e-05	0.00318671	0.000177393	0.0116586	-1.21603	12.121	NARS;RPL18A;RPS7;RPS8;RPL7L1;SARS;TARS;MRPL47;RPS11;RPL7
viral gene expression (GO:0019080)	0.00047778	0.0171277	0.00118443	0.0424602	-1.55558	11.8945	RPL18A;RPS7;RPS8;RPS11;UBA52;RPL7
response to UV-B (GO:0010224)	0.0066811	0.0759975	0.0110439	0.134217	-2.37247	11.8825	CDKN1A;CRIP1
regulation of chromatin organization (GO:1902275)	0.00410943	0.0615375	0.00732186	0.113786	-2.14542	11.788	HNRNPU;MKI67
regulation of cell cycle G2/M phase transition (GO:1902749)	0.000111626	0.00528213	0.000312585	0.0147915	-1.29034	11.7426	YWHAE;TPX2;CENPF;HMMR;HAUS2;TUBA4A
positive regulation of cell cycle arrest (GO:0071158)	0.000874963	0.0246448	0.00194841	0.0566328	-1.66275	11.708	BTG2;CDKN1A;UBB;MDM2;UBA52
cellular response to fibroblast growth factor stimulus (GO:0044344)	0.00160293	0.035116	0.00340127	0.0759189	-1.81575	11.686	HNRNPM;UBB;POLR2F;GTF2F1;UBA52
viral process (GO:0016032)	0.000837631	0.0246448	0.00225265	0.0595186	-1.6486	11.6802	RPL18A;RPS7;UBB;RPS8;DEK;RPS11;UBA52;RPL7
cotranslational protein targeting to membrane (GO:0006613)	0.000194553	0.00821984	0.000519097	0.0219319	-1.35289	11.5602	RPL18A;RPS7;RPS8;RPS11;UBA52;RPL7
regulation of chromosome organization (GO:0033044)	0.00138026	0.0320985	0.00273461	0.0647009	-1.746	11.4983	HNRNPD;HNRNPU;MKI67
establishment of chromosome localization (GO:0051303)	0.0066811	0.0759975	0.0110439	0.134217	-2.25286	11.2834	CENPE;CENPF
regulation of translation (GO:0006417)	0.000679406	0.0220053	0.00185623	0.0563056	-1.54513	11.2706	FXR1;SYNCRIP;BTG2;NCL;HNRNPD;HSPB1;POLR2F;UPF3B
nucleotide-excision repair, preincision complex assembly (GO:0006294)	0.0023583	0.044998	0.00439013	0.0865587	-1.8607	11.2569	UBB;ERCC5;UBA52
negative regulation of Notch signaling pathway (GO:0045746)	0.0023583	0.044998	0.00439013	0.0865587	-1.85933	11.2486	UBB;FBXW7;UBA52
chromatin assembly (GO:0031497)	0.00284526	0.0499393	0.00543411	0.0974023	-1.89671	11.1187	ATRX;H2AFX;ANP32E;ANP32B
regulation of telomere maintenance (GO:0032204)	0.00155014	0.0346004	0.0030278	0.0688825	-1.66613	10.7789	ATRX;HNRNPD;GNL3
cytoplasmic translation (GO:0002181)	0.0014523	0.0330398	0.00293711	0.0681294	-1.64161	10.7273	RPL18A;RPS7;RPL7L1;RPL7
DNA damage response, signal transduction by p53 class mediator resulting in cell cycle arrest (GO:0006977)	0.000244378	0.00963665	0.000608867	0.0240097	-1.25597	10.4457	BTG2;CDKN1A;UBB;MDM2;UBA52
signal transduction involved in mitotic G1 DNA damage checkpoint (GO:0072431)	0.000263196	0.0100439	0.000651169	0.0248494	-1.26195	10.4017	BTG2;CDKN1A;UBB;MDM2;UBA52
histone exchange (GO:0043486)	0.00431244	0.0622149	0.00755258	0.113786	-1.89588	10.3254	ANP32E;CENPM;ANP32B
cellular iron ion homeostasis (GO:0006879)	0.0142698	0.125046	0.0226166	0.198189	-2.39773	10.1894	UBB;FTH1;UBA52
fibroblast growth factor receptor signaling pathway (GO:0008543)	0.000698851	0.0220053	0.00158551	0.0521016	-1.39847	10.1613	HNRNPM;UBB;POLR2F;GTF2F1;UBA52
membrane raft assembly (GO:0001765)	0.0606699	0.258637	0.0778869	0.342173	-3.59702	10.08	S100A10
positive regulation of signal transduction by p53 class mediator (GO:1901798)	0.0109742	0.108187	0.0170326	0.17416	-2.22439	10.0369	RPS7;UBB
DNA metabolic process (GO:0006259)	0.000539638	0.0186088	0.00169399	0.0527365	-1.33273	10.0283	TOP2A;FAM111A;BTG2;SET;TRIM28;UBB;ATRX;PCLAF;UBA52;PTMS
negative regulation of DNA-dependent DNA replication (GO:2000104)	0.00870807	0.0928076	0.013897	0.156019	-2.09559	9.94046	FBXW7;SMC3
protein localization to nucleus (GO:0034504)	0.00175771	0.0371315	0.00370316	0.0796517	-1.56451	9.92483	PDIA3;MCM3AP;MDM2;HNRNPU;GPN3
very long-chain fatty acid biosynthetic process (GO:0042761)	0.0066811	0.0759975	0.0110439	0.134217	-1.98134	9.92351	ELOVL6;HACD2
virion assembly (GO:0019068)	0.0109742	0.108187	0.0170326	0.17416	-2.18121	9.84206	UBB;UBA52
positive regulation of protein export from nucleus (GO:0046827)	0.00870807	0.0928076	0.013897	0.156019	-2.06738	9.80664	YWHAE;ANP32B
regulation of extracellular exosome assembly (GO:1903551)	0.0606699	0.258637	0.0778869	0.342173	-3.48619	9.76938	SDC4
regulation of transcription from RNA polymerase I promoter (GO:0006356)	0.0109742	0.108187	0.0170326	0.17416	-2.14663	9.68604	UBTF;WDR43
error-prone translesion synthesis (GO:0042276)	0.0148022	0.125979	0.0222387	0.197808	-2.29535	9.67027	UBB;UBA52
glucan biosynthetic process (GO:0009250)	0.0121941	0.110967	0.0187024	0.181352	-2.19438	9.67021	UBB;UBA52
mRNA stabilization (GO:0048255)	0.00338657	0.054881	0.00607145	0.101162	-1.66453	9.46776	SYNCRIP;HNRNPU;HNRNPC
regulation of mitotic nuclear division (GO:0007088)	0.000974483	0.0249157	0.00215105	0.0595186	-1.35528	9.397	NUSAP1;HNRNPU;KIF20B;MKI67;SMC3
translesion synthesis (GO:0019985)	0.006588	0.0759975	0.0111067	0.134217	-1.869	9.38704	UBB;PCLAF;UBA52
fatty acid elongation (GO:0030497)	0.00576019	0.0725513	0.00972725	0.126435	-1.80988	9.33317	ELOVL6;HACD2
regulation of cyclin-dependent protein kinase activity (GO:1904029)	0.00398861	0.0612795	0.00703742	0.112504	-1.66522	9.19919	CDKN1A;CCNG1;GTPBP4
protein alpha-1,2-demannosylation (GO:0036508)	0.0206612	0.150878	0.0300571	0.22255	-2.33434	9.05607	UBB;UBA52
centromere complex assembly (GO:0034508)	0.00431244	0.0622149	0.00755258	0.113786	-1.66077	9.04498	CENPE;CENPF;CENPM
negative regulation of telomere maintenance via telomerase (GO:0032211)	0.0148022	0.125979	0.0222387	0.197808	-2.13929	9.01279	HNRNPU;HNRNPC
G2/M transition of mitotic cell cycle (GO:0000086)	0.00097061	0.0249157	0.00227756	0.0595186	-1.2947	8.98207	YWHAE;CDKN1A;UBB;UBA52;HAUS2;TUBA4A
error-free translesion synthesis (GO:0070987)	0.0134705	0.119817	0.0204383	0.191235	-2.07757	8.94864	UBB;UBA52
entry into host cell (GO:0030260)	0.00338657	0.054881	0.00607145	0.101162	-1.55929	8.86912	UBB;CD81;UBA52
dosage compensation by inactivation of X chromosome (GO:0009048)	0.0606699	0.258637	0.0778869	0.342173	-3.14965	8.82628	HNRNPU
nucleocytoplasmic transport (GO:0006913)	0.00843487	0.092393	0.013929	0.156019	-1.84475	8.80941	SET;ANP32A;ANP32E
regulation of cell cycle checkpoint (GO:1901976)	0.0606699	0.258637	0.0778869	0.342173	-3.14144	8.80329	WDR76
regulation of mitotic spindle organization (GO:0060236)	0.00398861	0.0612795	0.00703742	0.112504	-1.59035	8.78561	TPX2;HNRNPU;SMC3
tRNA aminoacylation for protein translation (GO:0006418)	0.00843487	0.092393	0.013929	0.156019	-1.8318	8.74752	NARS;SARS;TARS
positive regulation of cell migration by vascular endothelial growth factor signaling pathway (GO:0038089)	0.0690329	0.268638	0.087189	0.342173	-3.25527	8.70189	HSPB1
long-chain fatty-acyl-CoA biosynthetic process (GO:0035338)	0.0121941	0.110967	0.0187024	0.181352	-1.96293	8.65024	ELOVL6;HACD2
establishment of mitochondrion localization, microtubule-mediated (GO:0034643)	0.0606699	0.258637	0.0778869	0.342173	-3.07137	8.60693	UBB
positive regulation of protein ubiquitination involved in ubiquitin-dependent protein catabolic process (GO:2000060)	0.00791814	0.0892111	0.0139797	0.156019	-1.77269	8.57735	CDC20;UBB;FBXW7;UBA52
positive regulation of release of cytochrome c from mitochondria (GO:0090200)	0.0238955	0.160616	0.0343167	0.236027	-2.26109	8.44306	FAM162A;DNM1L
nuclear-transcribed mRNA catabolic process (GO:0000956)	0.000991366	0.0249157	0.00247339	0.0597147	-1.20379	8.32596	RPL18A;RPS7;RPS8;UPF3B;RPS11;UBA52;RPL7
protein retention in ER lumen (GO:0006621)	0.0606699	0.258637	0.0778869	0.342173	-2.95365	8.27704	PDIA3
regulation of apoptotic process (GO:0042981)	0.00638046	0.0759975	0.0205299	0.191235	-1.63611	8.26976	TOP2A;ANP32A;NME2;HSPB1;NME4;THOC6;UBB;FAM162A;ANP32E;YME1L1;ERCC5;ANP32B;DNM1L;UBA52;PHLDA3
regulation of oxidative stress-induced intrinsic apoptotic signaling pathway (GO:1902175)	0.0121941	0.110967	0.0187024	0.181352	-1.87593	8.26685	SFPQ;HSPB1
negative regulation of amino acid transport (GO:0051956)	0.0606699	0.258637	0.0778869	0.342173	-2.94345	8.24845	TRH
mannose metabolic process (GO:0006013)	0.0690329	0.268638	0.087189	0.342173	-3.08122	8.23663	PMM1
transcription-coupled nucleotide-excision repair (GO:0006283)	0.00429976	0.0622149	0.00794778	0.116214	-1.50146	8.18174	UBB;POLR2F;ERCC5;UBA52
negative regulation of cell cycle arrest (GO:0071157)	0.0161882	0.132991	0.0241022	0.208124	-1.98313	8.17739	CCND1;MDM2
negative regulation of transcription, DNA-templated (GO:0045892)	0.00624302	0.0759975	0.0201379	0.191235	-1.60892	8.16732	TCERG1;JUND;SET;HNRNPU;SARS;ENO1;CENPF;SFPQ;CCND1;TRIM28;UBB;MDM2;LYAR;UBA52;BPTF
erythrocyte development (GO:0048821)	0.0690329	0.268638	0.087189	0.342173	-3.0381	8.12136	LYAR
GDP-mannose metabolic process (GO:0019673)	0.0606699	0.258637	0.0778869	0.342173	-2.88976	8.09801	PMM1
mitotic cell cycle phase transition (GO:0044772)	0.000862468	0.0246448	0.00231433	0.0595186	-1.14172	8.05564	YWHAE;CDKN1A;CCND1;UBB;CCNE1;UBA52;HAUS2;TUBA4A
response to UV-A (GO:0070141)	0.0606699	0.258637	0.0778869	0.342173	-2.85497	8.0005	CCND1
positive regulation of telomere maintenance (GO:0032206)	0.0031079	0.0532848	0.00562018	0.0992339	-1.38255	7.98256	ATRX;HNRNPD;GNL3
cellular response to hydroxyurea (GO:0072711)	0.0690329	0.268638	0.087189	0.342173	-2.98094	7.96857	ATRX
regulation of nuclear cell cycle DNA replication (GO:0033262)	0.0606699	0.258637	0.0778869	0.342173	-2.79068	7.82034	ATRX
intrinsic apoptotic signaling pathway in response to DNA damage by p53 class mediator (GO:0042771)	0.0148022	0.125979	0.0222387	0.197808	-1.84999	7.79398	DDIT4;PHLDA3
regulation of mitotic spindle assembly (GO:1901673)	0.0134705	0.119817	0.0204383	0.191235	-1.80494	7.77435	HNRNPU;SMC3
positive regulation of cellular amide metabolic process (GO:0034250)	0.0178609	0.141809	0.027844	0.218021	-1.92569	7.75117	FXR1;HNRNPD;UPF3B
regulation of nuclear division (GO:0051783)	0.0161882	0.132991	0.0241022	0.208124	-1.86716	7.6992	KIF20B;MKI67
nucleoside phosphate biosynthetic process (GO:1901293)	0.0855373	0.270288	0.105515	0.342173	-3.12331	7.67961	NME2
tRNA aminoacylation (GO:0043039)	0.00576486	0.0725513	0.00983262	0.126435	-1.48642	7.66393	NARS;SARS;TARS
positive regulation of protein import into nucleus, translocation (GO:0033160)	0.0606699	0.258637	0.0778869	0.342173	-2.71221	7.60045	UBR5
negative regulation of telomere maintenance via telomere lengthening (GO:1904357)	0.0238955	0.160616	0.0343167	0.236027	-2.03257	7.58976	HNRNPU;HNRNPC
cellular response to DNA damage stimulus (GO:0006974)	0.00287056	0.0499393	0.00744252	0.113786	-1.2912	7.55771	TOP2A;BTG2;CDKN1A;CCND1;TRIM28;H2AFX;UBR5;PCLAF;CRIP1
nucleotide-excision repair, DNA incision (GO:0033683)	0.00576486	0.0725513	0.00983262	0.126435	-1.46525	7.55477	UBB;ERCC5;UBA52
cellular protein metabolic process (GO:0044267)	0.00138379	0.0320985	0.00449757	0.0872235	-1.13802	7.4915	RPL18A;RPS7;UBB;RPS8;SARS;TARS;YME1L1;RPS11;PDIA6;UBA52;KTN1;RPL7
negative regulation of chromosome organization (GO:2001251)	0.0606699	0.258637	0.0778869	0.342173	-2.66222	7.46036	TOP2A
negative regulation of cellular amide metabolic process (GO:0034249)	0.00472906	0.0658174	0.00867753	0.122209	-1.39094	7.44714	FXR1;SYNCRIP;BTG2;NCL
regulation of cyclin-dependent protein serine/threonine kinase activity (GO:0000079)	0.00317116	0.0535926	0.00600379	0.101162	-1.29301	7.43955	CDKN1A;CCND1;CCNG1;GTPBP4
nucleotide-excision repair, DNA damage recognition (GO:0000715)	0.0191187	0.145919	0.0280128	0.218021	-1.86559	7.3823	UBB;UBA52
nucleoside triphosphate biosynthetic process (GO:0009142)	0.0855373	0.270288	0.105515	0.342173	-2.99054	7.35314	NME2
nucleotide-excision repair, DNA duplex unwinding (GO:0000717)	0.0176274	0.141809	0.0260274	0.216834	-1.81646	7.33542	UBB;UBA52
positive regulation of tumor necrosis factor biosynthetic process (GO:0042535)	0.0773218	0.270288	0.0963979	0.342173	-2.85867	7.31757	HSPB1
positive regulation of intracellular protein transport (GO:0090316)	0.0120035	0.110967	0.0219355	0.197808	-1.64562	7.27783	YWHAE;FBXW7;ANP32B;KIF20B;WBP11
endoplasmic reticulum mannose trimming (GO:1904380)	0.0134705	0.119817	0.0204383	0.191235	-1.68722	7.26729	UBB;UBA52
outer mitochondrial membrane organization (GO:0007008)	0.0690329	0.268638	0.087189	0.342173	-2.7118	7.24911	HSPA4
apoptotic nuclear changes (GO:0030262)	0.0191187	0.145919	0.0280128	0.218021	-1.83037	7.24295	TOP2A;H1F0
RNA splicing, via transesterification reactions (GO:0000375)	0.0222538	0.15486	0.0321588	0.229864	-1.90023	7.23084	SCAF11;TRA2B
MyD88-dependent toll-like receptor signaling pathway (GO:0002755)	0.0291054	0.180271	0.0411138	0.262906	-2.04314	7.22625	UBB;UBA52
response to hydroxyurea (GO:0072710)	0.0773218	0.270288	0.0963979	0.342173	-2.81657	7.2098	ATRX
negative regulation of calcium ion transmembrane transport (GO:1903170)	0.0773218	0.270288	0.0963979	0.342173	-2.81626	7.209	YWHAE
regulation of necroptotic process (GO:0060544)	0.00981181	0.100934	0.0154302	0.163496	-1.55426	7.18715	UBB;UBA52
regulation of metaphase/anaphase transition of cell cycle (GO:1902099)	0.0773218	0.270288	0.0963979	0.342173	-2.80718	7.18577	CENPE
fatty acid elongation, saturated fatty acid (GO:0019367)	0.0690329	0.268638	0.087189	0.342173	-2.67929	7.16221	ELOVL6
nucleotide-binding oligomerization domain containing signaling pathway (GO:0070423)	0.0273223	0.17696	0.0387954	0.256397	-1.98108	7.132	UBB;UBA52
nucleotide-binding domain, leucine rich repeat containing receptor signaling pathway (GO:0035872)	0.0222538	0.15486	0.0321588	0.229864	-1.86724	7.1053	UBB;UBA52
positive regulation of ATP biosynthetic process (GO:2001171)	0.0606699	0.258637	0.0778869	0.342173	-2.51895	7.05886	ENO1
cytoplasmic pattern recognition receptor signaling pathway (GO:0002753)	0.0206612	0.150878	0.0300571	0.22255	-1.80988	7.02144	UBB;UBA52
SCF-dependent proteasomal ubiquitin-dependent protein catabolic process (GO:0031146)	0.00409532	0.0615375	0.00759855	0.113786	-1.27566	7.01344	UBB;FBXW7;RNF7;UBA52
chaperone mediated protein folding requiring cofactor (GO:0051085)	0.0206612	0.150878	0.0300571	0.22255	-1.80469	7.0013	DNAJC7;HSPA4
transcription elongation from RNA polymerase I promoter (GO:0006362)	0.0273223	0.17696	0.0387954	0.256397	-1.94149	6.98948	UBTF;POLR2F
TRIF-dependent toll-like receptor signaling pathway (GO:0035666)	0.0291054	0.180271	0.0411138	0.262906	-1.9698	6.96686	UBB;UBA52
negative regulation of ubiquitin protein ligase activity (GO:1904667)	0.00518629	0.0705216	0.00944979	0.126435	-1.32354	6.96413	CDC20;RPS7;UBB;UBA52
regulation of protein localization to Cajal body (GO:1904869)	0.0773218	0.270288	0.0963979	0.342173	-2.70718	6.92977	CCT6A
transcription initiation from RNA polymerase II promoter (GO:0006367)	0.0146897	0.125979	0.026447	0.218021	-1.63458	6.89892	CDKN1A;CCND1;TRIM28;POLR2F;GTF2F1
cellular transition metal ion homeostasis (GO:0046916)	0.00993965	0.101367	0.0172608	0.174526	-1.48853	6.86396	UBB;FTH1;UBA52;ATOX1
postreplication repair (GO:0006301)	0.00893922	0.0944205	0.0146923	0.160935	-1.45495	6.86346	UBB;PCLAF;UBA52
positive regulation of DNA metabolic process (GO:0051054)	0.00645663	0.0759975	0.0115724	0.136901	-1.35524	6.834	TRIM28;ATRX;H2AFX;GNL3
intrinsic apoptotic signaling pathway in response to DNA damage (GO:0008630)	0.00946089	0.0981774	0.0154789	0.163496	-1.45936	6.80146	DDIT4;CRIP1;PHLDA3
negative regulation of cellular response to hypoxia (GO:1900038)	0.0606699	0.258637	0.0778869	0.342173	-2.42364	6.79178	ENO1
regulation of mitochondrion organization (GO:0010821)	0.00946089	0.0981774	0.0154789	0.163496	-1.45474	6.77997	FBXW7;DNM1L;WBP11
protein lipoylation (GO:0009249)	0.0773218	0.270288	0.0963979	0.342173	-2.64735	6.77662	POP5
regulation of transcription involved in G1/S transition of mitotic cell cycle (GO:0000083)	0.0238955	0.160616	0.0343167	0.236027	-1.81391	6.77327	RRM2;CCNE1
fatty acid elongation, polyunsaturated fatty acid (GO:0034626)	0.0690329	0.268638	0.087189	0.342173	-2.52495	6.74964	ELOVL6
regulation of mitotic cell cycle (GO:0007346)	0.00375115	0.0591682	0.00795716	0.116214	-1.20612	6.73702	TPX2;BTG2;MDM2;HNRNPU;KIF20B;MKI67
chromosome condensation (GO:0030261)	0.0191187	0.145919	0.0280128	0.218021	-1.69949	6.72505	TOP2A;NUSAP1
long-chain fatty-acyl-CoA metabolic process (GO:0035336)	0.0222538	0.15486	0.0321588	0.229864	-1.76303	6.70876	ELOVL6;HACD2
carbohydrate derivative biosynthetic process (GO:1901137)	0.0291054	0.180271	0.0411138	0.262906	-1.89163	6.69039	RRM1;RRM2
regulation of viral transcription (GO:0046782)	0.00576486	0.0725513	0.00983262	0.126435	-1.2904	6.65329	IFITM3;POLR2F;GTF2F1
negative regulation of transcription from RNA polymerase II promoter (GO:0000122)	0.00171372	0.0368607	0.0057534	0.100092	-1.04455	6.65286	TCERG1;JUND;ATRX;HNRNPU;SARS;ENO1;SFPQ;CCND1;UBB;MDM2;LYAR;UBA52;BPTF
negative regulation of gene expression (GO:0010629)	0.00370092	0.0591647	0.01154	0.136901	-1.18716	6.6471	SUZ12;BTG2;SET;ENO1;FXR1;SYNCRIP;CENPF;SFPQ;TRIM28;NCL;PTRH2;ERP29;MDM2
viral mRNA export from host cell nucleus (GO:0046784)	0.0773218	0.270288	0.0963979	0.342173	-2.59313	6.63785	THOC6
regulation of osteoclast development (GO:2001204)	0.0606699	0.258637	0.0778869	0.342173	-2.36646	6.63156	FBXW7
long-chain fatty acid biosynthetic process (GO:0042759)	0.0855373	0.270288	0.105515	0.342173	-2.69704	6.63148	ELOVL6
positive regulation of catenin import into nucleus (GO:0035413)	0.0773218	0.270288	0.0963979	0.342173	-2.5783	6.59988	UBR5
proteasome-mediated ubiquitin-dependent protein catabolic process (GO:0043161)	0.00472839	0.0658174	0.0111186	0.134217	-1.23177	6.5951	CDC20;UBB;CSNK1A1;FBXW7;UBXN2A;MDM2;RNF7;UBA52
virion attachment to host cell (GO:0019062)	0.0855373	0.270288	0.105515	0.342173	-2.66034	6.54125	CD81
fatty acid elongation, unsaturated fatty acid (GO:0019368)	0.0690329	0.268638	0.087189	0.342173	-2.44275	6.52989	ELOVL6
nucleotide-excision repair, DNA gap filling (GO:0006297)	0.0191187	0.145919	0.0280128	0.218021	-1.64947	6.52712	UBB;UBA52
regulation of protein ubiquitination involved in ubiquitin-dependent protein catabolic process (GO:2000058)	0.0222538	0.15486	0.0321588	0.229864	-1.70797	6.49925	RPS7;FBXW7
regulation of oxidative stress-induced neuron intrinsic apoptotic signaling pathway (GO:1903376)	0.0606699	0.258637	0.0778869	0.342173	-2.30829	6.46853	FBXW7
positive regulation of protein localization to Cajal body (GO:1904871)	0.0773218	0.270288	0.0963979	0.342173	-2.52486	6.46308	CCT6A
[truncated: 996 more rows]

## Sheet: Cluster2-Molecular Function
Term	P-value	Adjusted P-value	Old P-value	Old Adjusted P-value	Z-score	Combined Score	Genes
[truncated: 236 more rows]

## Sheet: Cluster2-Cellular Component
Term	P-value	Adjusted P-value	Old P-value	Old Adjusted P-value	Z-score	Combined Score	Genes
[truncated: 159 more rows]

[truncated: 3 more sheets: Cluster1-Biological Process, Cluster1-Molecular Function, Cluster1-Cellular Component]
