# Supplementary material for: ATR expands embryonic stem cell fate potential in response to replication stress
Source: eLife. 2020 Mar 12;9:e54756. doi: 10.7554/eLife.54756 (PMC7067586; doi:10.7554/eLife.54756)
Supplement: Supplementary file 3. [file elife-54756-supp3.xlsx]

## Sheet: Sheet1
Supplementary Table 3. List of DEGs in APH induced ESCs.
gene	log2_fc	log2_mean	p_value	FDR	experiment
0610005C13Rik	0.0252699	-0.984927	0.934576	0.954043	aphi_vs_ctrl
0610006L08Rik	-0.333247	-6.10601	0.113148	0.204832	aphi_vs_ctrl
0610007P14Rik	-0.0896118	5.37292	0.546108	0.671387	aphi_vs_ctrl
0610009B22Rik	0.0361559	4.32362	0.780853	0.844451	aphi_vs_ctrl
0610009E02Rik	-0.605463	-1.64248	0.301785	0.440594	aphi_vs_ctrl
0610009L18Rik	-0.719039	-0.927629	0.0929742	0.204832	aphi_vs_ctrl
0610009O20Rik	-0.815653	5.57956	2.99651e-05	0.00145608	aphi_vs_ctrl
0610010B08Rik	0.313649	4.12747	0.135347	0.23523	aphi_vs_ctrl
0610010F05Rik	-0.0822716	4.76319	0.359603	0.504401	aphi_vs_ctrl
0610010K14Rik	-1.22426	4.17354	3.66467e-05	0.00158087	aphi_vs_ctrl
0610012G03Rik	-0.281171	4.28614	0.20797	0.329034	aphi_vs_ctrl
0610025J13Rik	1.64704	-5.26692	0.00910903	0.0429822	aphi_vs_ctrl
0610030E20Rik	-0.124467	4.06506	0.450473	0.58871	aphi_vs_ctrl
0610031O16Rik	0.190566	-5.93082	0.646491	0.74773	aphi_vs_ctrl
0610037L13Rik	-0.605211	4.71081	0.00932241	0.0436991	aphi_vs_ctrl
0610038B21Rik	-0.00443036	-2.94676	0.994961	0.996752	aphi_vs_ctrl
0610039H22Rik	-0.233387	-2.17	0.64508	0.74773	aphi_vs_ctrl
0610039K10Rik	-0.0804033	-0.293258	0.838149	0.885627	aphi_vs_ctrl
0610040B10Rik	0.680596	-0.436485	0.0122978	0.0534225	aphi_vs_ctrl
0610040F04Rik	0.0691328	0.682756	0.62812	0.738764	aphi_vs_ctrl
0610040J01Rik	2.11236	-0.98391	6.66697e-05	0.00207341	aphi_vs_ctrl
0610043K17Rik	-0.926084	-0.867448	0.0560592	0.163293	aphi_vs_ctrl
1010001N08Rik	0.199715	-5.00561	0.655733	0.755121	aphi_vs_ctrl
1100001I12Rik	-0.333247	-6.10601	0.113148	0.204832	aphi_vs_ctrl
1110002J07Rik	0.166705	4.31247	0.177895	0.291853	aphi_vs_ctrl
1110002L01Rik	0.0179869	4.82559	0.857063	0.899567	aphi_vs_ctrl
1110002O04Rik	0.771315	-1.74936	0.330943	0.47344	aphi_vs_ctrl
1110004E09Rik	-0.627917	4.31908	0.00368392	0.0225036	aphi_vs_ctrl
1110004F10Rik	-0.292913	6.23039	0.041046	0.128938	aphi_vs_ctrl
1110006O24Rik	-1.03835	-1.7294	0.0224334	0.0824479	aphi_vs_ctrl
1110008F13Rik	-0.0968249	6.126	0.593987	0.711364	aphi_vs_ctrl
1110008L16Rik	-0.105205	5.60585	0.388507	0.534151	aphi_vs_ctrl
1110008P14Rik	-0.138647	3.34399	0.55885	0.682943	aphi_vs_ctrl
1110012L19Rik	0.644248	4.38429	0.00152864	0.0125803	aphi_vs_ctrl
1110015O18Rik	-0.333247	-6.10601	0.113148	0.204832	aphi_vs_ctrl
1110017D15Rik	2.70809	-4.23436	0.00199705	0.0150325	aphi_vs_ctrl
1110018N20Rik	-0.0227678	1.58109	0.898953	0.929811	aphi_vs_ctrl
1110019D14Rik	1.11101	2.87121	3.54218e-05	0.0015624	aphi_vs_ctrl
1110020A21Rik	0.293497	-1.2497	0.236241	0.364562	aphi_vs_ctrl
1110025L11Rik	-0.333247	-6.10601	0.113148	0.204832	aphi_vs_ctrl
1110028F11Rik	3.57291	-3.71735	0.000857516	0.00868052	aphi_vs_ctrl
1110028F18Rik	1.73778	-0.504488	0.0073959	0.0370194	aphi_vs_ctrl
1110032A03Rik	0.763301	2.16755	0.00654196	0.0338691	aphi_vs_ctrl
1110032F04Rik	0.395275	0.00890182	0.144722	0.247879	aphi_vs_ctrl
1110034G24Rik	-0.589703	2.94523	0.00714543	0.0361358	aphi_vs_ctrl
1110036E04Rik	-0.184441	-3.91077	0.819464	0.872537	aphi_vs_ctrl
1110037F02Rik	-0.00691023	7.00331	0.904587	0.93392	aphi_vs_ctrl
1110038B12Rik	-0.475131	5.34206	0.003845	0.0231976	aphi_vs_ctrl
1110038F14Rik	-0.252425	4.7384	0.0489651	0.147205	aphi_vs_ctrl
1110046J04Rik	0.21136	-0.128069	0.696621	0.781797	aphi_vs_ctrl
1110051M20Rik	0.444702	3.62603	0.000423201	0.00563784	aphi_vs_ctrl
1110057P08Rik	-0.333247	-6.10601	0.113148	0.204832	aphi_vs_ctrl
1110058D11Rik	-0.516695	-3.43131	0.629247	0.739572	aphi_vs_ctrl
1110059E24Rik	0.272916	5.1178	0.0356326	0.115753	aphi_vs_ctrl
1110059G10Rik	0.220058	2.94148	0.100015	0.204832	aphi_vs_ctrl
1110065P20Rik	0.153823	3.01857	0.164934	0.274528	aphi_vs_ctrl
1190002N15Rik	-0.826384	4.25	0.00192573	0.0147038	aphi_vs_ctrl
1190003K10Rik	-0.333247	-6.10601	0.113148	0.204832	aphi_vs_ctrl
1190005I06Rik	1.21297	2.12238	0.00256598	0.0177419	aphi_vs_ctrl
1190007I07Rik	-0.401121	2.18236	0.0322415	0.107419	aphi_vs_ctrl
1190028D05Rik	-0.110661	2.46482	0.661484	0.756942	aphi_vs_ctrl
1300002E11Rik	0.0319062	2.24017	0.781552	0.844861	aphi_vs_ctrl
1300017J02Rik	2.28028	1.8596	4.59735e-05	0.00173391	aphi_vs_ctrl
140Imeg	-0.104895	6.44388	0.434906	0.578016	aphi_vs_ctrl
1500002F19Rik	-0.132409	-0.314004	0.747466	0.820214	aphi_vs_ctrl
1500004A13Rik	-0.30333	2.69662	0.0241469	0.0869542	aphi_vs_ctrl
1500009C09Rik	0.911392	2.93743	0.0015843	0.0128827	aphi_vs_ctrl
1500009L16Rik	0.996801	4.4661	3.70562e-05	0.00159088	aphi_vs_ctrl
1500011B03Rik	-0.573249	3.169	0.0015438	0.0126444	aphi_vs_ctrl
1500011K16Rik	-0.749567	2.94167	0.000522661	0.00639715	aphi_vs_ctrl
1500012K07Rik	0.0130423	-0.631997	0.978435	0.985127	aphi_vs_ctrl
1500015A07Rik	-0.355503	2.19499	0.0503134	0.15029	aphi_vs_ctrl
1500015L24Rik	-0.333247	-6.10601	0.113148	0.204832	aphi_vs_ctrl
1500015O10Rik	1.98808	-2.8638	0.0324544	0.10794	aphi_vs_ctrl
1500017E21Rik	0.401066	-4.22314	0.426741	0.571638	aphi_vs_ctrl
1500026H17Rik	0.577433	4.43983	0.0807594	0.204832	aphi_vs_ctrl
1500035N22Rik	0.49241	-3.08597	0.631345	0.741096	aphi_vs_ctrl
1520401A03Rik	2.38589	-2.3584	0.0139582	0.0586219	aphi_vs_ctrl
1600002D24Rik	3.45821	-1.49579	0.000907539	0.00900656	aphi_vs_ctrl
1600002H07Rik	-0.334535	4.75758	0.0213569	0.0795526	aphi_vs_ctrl
1600002K03Rik	-0.844881	1.69237	0.000539352	0.00652218	aphi_vs_ctrl
1600010M07Rik	2.41381	-1.38108	0.000130331	0.00285981	aphi_vs_ctrl
1600012H06Rik	-0.175364	4.08993	0.132861	0.231756	aphi_vs_ctrl
1600014C10Rik	0.512598	3.25927	0.0114698	0.0506226	aphi_vs_ctrl
1600014C23Rik	-1.61319	-2.32569	0.00737471	0.0369608	aphi_vs_ctrl
1600015I10Rik	-0.333218	-5.92952	0.429973	0.573062	aphi_vs_ctrl
1600019K03Rik	-0.333757	-5.92927	0.481908	0.613627	aphi_vs_ctrl
1600020E01Rik	-0.293491	3.0365	0.178983	0.293297	aphi_vs_ctrl
1600023N17Rik	-0.260809	-2.51517	0.55476	0.679159	aphi_vs_ctrl
1600025M17Rik	0.369661	-4.91055	0.406028	0.551554	aphi_vs_ctrl
1600027J07Rik	-0.333757	-5.92927	0.481908	0.613627	aphi_vs_ctrl
1600029I14Rik	1.16023	-2.88621	0.0140605	0.0589515	aphi_vs_ctrl
1600029O15Rik	-0.305815	-0.537651	0.349199	0.49336	aphi_vs_ctrl
1700001C02Rik	2.17629	-4.588	0.0835035	0.204832	aphi_vs_ctrl
1700001C19Rik	1.39511	-0.794711	0.0206844	0.0776612	aphi_vs_ctrl
1700001D01Rik	0.603207	-4.16935	0.155153	0.261789	aphi_vs_ctrl
1700001F09Rik	0.845713	-4.94565	0.491654	0.621814	aphi_vs_ctrl
1700001G01Rik	-0.333247	-6.10601	0.113148	0.204832	aphi_vs_ctrl
1700001G11Rik	0.780516	0.0744435	0.00622125	0.0326395	aphi_vs_ctrl
1700001G17Rik	1.66424	-4.74945	0.0104689	0.0474019	aphi_vs_ctrl
1700001J03Rik	0.436969	-5.14461	0.651943	0.752014	aphi_vs_ctrl
1700001J11Rik	0.655649	-0.445448	0.201379	0.321064	aphi_vs_ctrl
1700001K19Rik	-0.27546	-0.501117	0.56953	0.69234	aphi_vs_ctrl
1700001K23Rik	1.92942	-3.30704	0.0960757	0.204832	aphi_vs_ctrl
1700001L05Rik	-0.472809	6.11	0.0261241	0.0920849	aphi_vs_ctrl
1700001L19Rik	-0.49929	-2.25294	0.416292	0.561635	aphi_vs_ctrl
1700001O22Rik	0.544885	0.199447	0.0109624	0.0488722	aphi_vs_ctrl
1700001P01Rik	1.90671	0.401058	0.000103386	0.00255062	aphi_vs_ctrl
1700003C15Rik	-0.333247	-6.10601	0.113148	0.204832	aphi_vs_ctrl
1700003D09Rik	0.970369	-4.32454	0.112502	0.204832	aphi_vs_ctrl
1700003E16Rik	2.08602	0.98962	0.000907491	0.00900656	aphi_vs_ctrl
1700003E24Rik	0.975011	-4.79315	0.224722	0.350253	aphi_vs_ctrl
1700003F12Rik	1.07165	-1.50905	0.0569628	0.16518	aphi_vs_ctrl
1700003G13Rik	3.11319	-3.95347	0.00242517	0.0170554	aphi_vs_ctrl
1700003G18Rik	-0.871026	-3.38569	0.317429	0.458309	aphi_vs_ctrl
1700003H04Rik	0.193148	-5.57661	0.720548	0.799555	aphi_vs_ctrl
1700003I22Rik	-0.333247	-6.10601	0.113148	0.204832	aphi_vs_ctrl
1700003L19Rik	0.196576	-5.44193	0.783081	0.846102	aphi_vs_ctrl
1700003M07Rik	1.76408	3.07145	0.000548385	0.00658736	aphi_vs_ctrl
1700003P14Rik	-0.333247	-6.10601	0.113148	0.204832	aphi_vs_ctrl
1700006A11Rik	-0.333247	-6.10601	0.113148	0.204832	aphi_vs_ctrl
1700006E09Rik	0.194252	-5.75332	0.773642	0.83876	aphi_vs_ctrl
1700006F04Rik	-0.858622	-5.93019	0.0671804	0.18541	aphi_vs_ctrl
1700006H20Rik	0.423974	-3.29154	0.428447	0.573062	aphi_vs_ctrl
1700006H21Rik	-0.334344	-5.57995	0.112482	0.204832	aphi_vs_ctrl
1700007B14Rik	-2.10419	-4.12055	0.0564993	0.164265	aphi_vs_ctrl
1700007E05Rik	-0.387081	0.00832314	0.272591	0.406924	aphi_vs_ctrl
1700007F19Rik	1.37964	-4.96502	0.242088	0.37171	aphi_vs_ctrl
1700007G11Rik	-0.330234	-5.3152	0.711974	0.79311	aphi_vs_ctrl
1700007J10Rik	-0.329345	-1.19155	0.306784	0.446468	aphi_vs_ctrl
1700007K09Rik	0.0545992	-3.87143	0.933761	0.953479	aphi_vs_ctrl
1700007K13Rik	2.04244	5.15892	4.04526e-06	0.000845882	aphi_vs_ctrl
1700007L15Rik	-0.498697	1.33327	0.0462716	0.14084	aphi_vs_ctrl
1700007P06Rik	-0.316983	-0.0930655	0.415631	0.561048	aphi_vs_ctrl
1700008C04Rik	1.29591	-3.04266	0.320354	0.461482	aphi_vs_ctrl
1700008J07Rik	-1.1033	0.978043	0.00829604	0.0402007	aphi_vs_ctrl
1700008K24Rik	-0.333247	-6.10601	0.113148	0.204832	aphi_vs_ctrl
1700008O03Rik	-0.0689089	1.0364	0.777958	0.842034	aphi_vs_ctrl
1700008P02Rik	-0.333247	-6.10601	0.113148	0.204832	aphi_vs_ctrl
1700009C05Rik	1.46587	-4.07858	0.183281	0.298823	aphi_vs_ctrl
1700009J07Rik	-0.333247	-6.10601	0.113148	0.204832	aphi_vs_ctrl
1700009N14Rik	-0.333247	-6.10601	0.113148	0.204832	aphi_vs_ctrl
1700010B08Rik	0.883981	-3.43558	0.0541996	0.159235	aphi_vs_ctrl
1700010D01Rik	0.599058	-5.17009	0.624133	0.735726	aphi_vs_ctrl
1700010I02Rik	-1.152	-2.36583	0.0028032	0.0187583	aphi_vs_ctrl
1700010I14Rik	0.697054	-0.190302	0.0716298	0.194554	aphi_vs_ctrl
1700010J16Rik	-0.333247	-6.10601	0.113148	0.204832	aphi_vs_ctrl
1700010K23Rik	-0.333247	-6.10601	0.113148	0.204832	aphi_vs_ctrl
1700010L04Rik	1.67626	-0.434379	0.0134968	0.057249	aphi_vs_ctrl
1700010N08Rik	-1.12398	-0.227103	0.0100771	0.0461826	aphi_vs_ctrl
1700011B04Rik	-0.333757	-5.92927	0.481908	0.613627	aphi_vs_ctrl
1700011C11Rik	-0.333247	-6.10601	0.113148	0.204832	aphi_vs_ctrl
1700011E24Rik	0.561541	-3.48949	0.592606	0.710181	aphi_vs_ctrl
1700011H14Rik	0.559073	-3.13577	0.41708	0.562573	aphi_vs_ctrl
1700011I03Rik	-0.333247	-6.10601	0.113148	0.204832	aphi_vs_ctrl
1700011L22Rik	0.168163	-4.84436	0.888563	0.922352	aphi_vs_ctrl
1700011M02Rik	-0.333247	-6.10601	0.113148	0.204832	aphi_vs_ctrl
1700012A03Rik	-0.333247	-6.10601	0.113148	0.204832	aphi_vs_ctrl
1700012B07Rik	-1.09479	-2.86271	0.0794023	0.204832	aphi_vs_ctrl
1700012B09Rik	0.196826	-5.31986	0.591216	0.709236	aphi_vs_ctrl
1700012C14Rik	1.01462	-2.48113	0.0106507	0.0479612	aphi_vs_ctrl
1700012D01Rik	-0.624984	-1.46841	0.25822	0.390614	aphi_vs_ctrl
1700012D14Rik	-0.481716	-1.02544	0.320043	0.461181	aphi_vs_ctrl
1700012D16Rik	-0.627882	-3.85901	0.582508	0.702248	aphi_vs_ctrl
1700012H19Rik	-0.0802642	-5.67128	0.886498	0.920775	aphi_vs_ctrl
1700012I11Rik	-0.333247	-6.10601	0.113148	0.204832	aphi_vs_ctrl
1700012J15Rik	0.336673	-2.64043	0.590629	0.708751	aphi_vs_ctrl
1700012P22Rik	0.436943	-5.59129	0.456409	0.594663	aphi_vs_ctrl
1700013D24Rik	-0.333247	-6.10601	0.113148	0.204832	aphi_vs_ctrl
1700013F07Rik	1.97893	-2.91946	0.0156456	0.0636471	aphi_vs_ctrl
1700013G24Rik	3.34586	-1.86964	0.00179363	0.014048	aphi_vs_ctrl
1700013H16Rik	-0.0454077	3.72172	0.556841	0.681186	aphi_vs_ctrl
1700013N06Rik	-0.333247	-6.10601	0.113148	0.204832	aphi_vs_ctrl
1700015C15Rik	-0.360816	-1.95606	0.116897	0.20979	aphi_vs_ctrl
1700015E13Rik	-0.333467	-5.57613	0.637445	0.745792	aphi_vs_ctrl
1700015F17Rik	-0.333247	-6.10601	0.113148	0.204832	aphi_vs_ctrl
1700015G11Rik	-0.333247	-6.10601	0.113148	0.204832	aphi_vs_ctrl
1700016A09Rik	-0.636991	-1.46054	0.151009	0.256164	aphi_vs_ctrl
1700016B01Rik	0.604018	-5.79428	0.421821	0.566432	aphi_vs_ctrl
1700016C15Rik	0.984889	-1.82478	0.240486	0.369771	aphi_vs_ctrl
1700016C19Rik	-0.0865816	0.524251	0.824001	0.875897	aphi_vs_ctrl
1700016D06Rik	-0.448231	0.953952	0.158402	0.266056	aphi_vs_ctrl
1700016G14Rik	-0.327031	-1.31865	0.0999082	0.204832	aphi_vs_ctrl
1700016G22Rik	1.9013	-4.69576	0.0104769	0.0474207	aphi_vs_ctrl
1700016H13Rik	0.387453	-1.29429	0.377181	0.522171	aphi_vs_ctrl
1700016J18Rik	0.644814	-1.91626	0.242366	0.372001	aphi_vs_ctrl
1700016K19Rik	2.40849	-1.38114	0.00577963	0.0309786	aphi_vs_ctrl
1700016L04Rik	-0.333666	-5.79326	0.659911	0.756942	aphi_vs_ctrl
1700016L21Rik	-0.333247	-6.10601	0.113148	0.204832	aphi_vs_ctrl
1700016P04Rik	-0.333247	-6.10601	0.113148	0.204832	aphi_vs_ctrl
1700017B05Rik	-0.0296122	5.06115	0.744564	0.817861	aphi_vs_ctrl
1700017D01Rik	0.247581	-5.56732	0.62845	0.73908	aphi_vs_ctrl
1700017G19Rik	0.437112	-5.84912	0.462648	0.599488	aphi_vs_ctrl
1700017J07Rik	-0.167119	-1.73203	0.644257	0.74773	aphi_vs_ctrl
1700017L05Rik	-0.333247	-6.10601	0.113148	0.204832	aphi_vs_ctrl
1700017M07Rik	0.23556	-2.08305	0.721431	0.800142	aphi_vs_ctrl
1700017N19Rik	-0.333247	-6.10601	0.113148	0.204832	aphi_vs_ctrl
1700018A04Rik	-0.333247	-6.10601	0.113148	0.204832	aphi_vs_ctrl
1700018A23Rik	-0.675309	-3.38469	0.329019	0.471243	aphi_vs_ctrl
1700018B08Rik	-0.0937054	2.4762	0.442739	0.581472	aphi_vs_ctrl
1700018B24Rik	-0.154134	-0.532034	0.470018	0.60682	aphi_vs_ctrl
1700018C11Rik	-0.333247	-6.10601	0.113148	0.204832	aphi_vs_ctrl
1700018F24Rik	0.613892	-5.26555	0.493096	0.623223	aphi_vs_ctrl
1700018G05Rik	-0.333757	-5.92927	0.481908	0.613627	aphi_vs_ctrl
1700018L02Rik	0.344724	-4.53087	0.756302	0.827051	aphi_vs_ctrl
1700019A02Rik	0.0749311	-0.766385	0.873038	0.910902	aphi_vs_ctrl
1700019B03Rik	0.713981	-2.76478	0.0820425	0.204832	aphi_vs_ctrl
1700019B21Rik	-0.429564	-3.73361	0.699764	0.784239	aphi_vs_ctrl
1700019C18Rik	-0.333247	-6.10601	0.113148	0.204832	aphi_vs_ctrl
1700019D03Rik	-0.782915	5.88067	6.47695e-05	0.00205315	aphi_vs_ctrl
1700019E08Rik	-0.664655	-2.12979	0.266672	0.400634	aphi_vs_ctrl
1700019F05Rik	-1.10491	-5.59054	0.24631	0.376805	aphi_vs_ctrl
1700019G24Rik	2.74263	-3.72809	0.00601375	0.0318558	aphi_vs_ctrl
1700019J19Rik	1.25074	-4.52803	0.216219	0.339531	aphi_vs_ctrl
1700019L22Rik	-0.287926	-2.72681	0.708571	0.791094	aphi_vs_ctrl
1700019M22Rik	-0.333247	-6.10601	0.113148	0.204832	aphi_vs_ctrl
1700019N19Rik	2.43623	-4.21663	0.00213967	0.0156723	aphi_vs_ctrl
1700019O17Rik	4.77381	-1.65084	0.00249949	0.0174323	aphi_vs_ctrl
1700019P21Rik	-0.333247	-6.10601	0.113148	0.204832	aphi_vs_ctrl
1700020A23Rik	1.5842	-4.43036	0.0793901	0.204832	aphi_vs_ctrl
1700020D05Rik	-0.0162541	-1.34198	0.977803	0.984856	aphi_vs_ctrl
1700020D12Rik	-0.333247	-6.10601	0.113148	0.204832	aphi_vs_ctrl
1700020D14Rik	-0.333247	-6.10601	0.113148	0.204832	aphi_vs_ctrl
1700020G17Rik	-0.993054	-3.17362	0.350558	0.494591	aphi_vs_ctrl
1700020I14Rik	-0.0428345	5.03603	0.455568	0.593866	aphi_vs_ctrl
1700020L24Rik	-0.318583	-1.51134	0.456366	0.594647	aphi_vs_ctrl
1700020M21Rik	0.13398	-4.55517	0.900187	0.930679	aphi_vs_ctrl
1700020N01Rik	1.50134	-0.948878	6.65085e-05	0.00207196	aphi_vs_ctrl
1700020N15Rik	-1.70665	-3.24701	0.0322566	0.10745	aphi_vs_ctrl
1700020N18Rik	0.969741	-5.41336	0.222708	0.347728	aphi_vs_ctrl
1700021F02Rik	0.606466	-5.79334	0.418163	0.563319	aphi_vs_ctrl
1700021F05Rik	-1.0054	3.75397	0.000918987	0.00909656	aphi_vs_ctrl
1700021F07Rik	0.233436	-4.61586	0.715034	0.795389	aphi_vs_ctrl
1700021L23Rik	1.00773	-3.9278	0.189014	0.305799	aphi_vs_ctrl
1700021N21Rik	-1.04215	-3.9011	0.412117	0.557645	aphi_vs_ctrl
1700022A21Rik	-0.207176	-1.15301	0.269867	0.404091	aphi_vs_ctrl
1700022A22Rik	-0.85553	-5.93112	0.102053	0.204832	aphi_vs_ctrl
1700022E09Rik	-0.333247	-6.10601	0.113148	0.204832	aphi_vs_ctrl
1700022H01Rik	0.0645412	-2.48774	0.814521	0.868833	aphi_vs_ctrl
1700022H16Rik	-0.333247	-6.10601	0.113148	0.204832	aphi_vs_ctrl
1700022I11Rik	0.858912	-1.77765	0.140643	0.242454	aphi_vs_ctrl
1700022N22Rik	0.76388	-1.46316	0.0899833	0.204832	aphi_vs_ctrl
1700023C21Rik	-0.332654	-5.93004	0.443149	0.581472	aphi_vs_ctrl
1700023F02Rik	0.19264	-5.93006	0.666108	0.757602	aphi_vs_ctrl
1700023F06Rik	0.274758	-2.73288	0.476027	0.612001	aphi_vs_ctrl
1700023G09Rik	0.194042	-5.36051	0.790453	0.851625	aphi_vs_ctrl
1700024B05Rik	0.668773	-1.57557	0.190857	0.308174	aphi_vs_ctrl
1700024B18Rik	0.189501	-5.75357	0.655953	0.755258	aphi_vs_ctrl
1700024F13Rik	0.437114	-5.84912	0.462647	0.599488	aphi_vs_ctrl
1700024G13Rik	0.981112	-3.44124	0.28607	0.42241	aphi_vs_ctrl
1700024I08Rik	0.0737947	-4.28002	0.960683	0.97265	aphi_vs_ctrl
1700024N05Rik	-0.333247	-6.10601	0.113148	0.204832	aphi_vs_ctrl
1700024P04Rik	-1.6601	-5.15284	0.107228	0.204832	aphi_vs_ctrl
1700024P16Rik	1.86456	-2.24864	0.0888547	0.204832	aphi_vs_ctrl
1700025B11Rik	-0.333247	-6.10601	0.113148	0.204832	aphi_vs_ctrl
1700025C18Rik	0.197064	-5.75408	0.760424	0.830202	aphi_vs_ctrl
1700025D23Rik	1.2185	-5.59043	0.0782906	0.204832	aphi_vs_ctrl
1700025F22Rik	-0.333247	-6.10601	0.113148	0.204832	aphi_vs_ctrl
1700025F24Rik	1.80142	-4.20667	0.047733	0.144352	aphi_vs_ctrl
1700025G04Rik	0.119578	2.95595	0.0773605	0.204832	aphi_vs_ctrl
1700025J12Rik	0.437114	-5.84912	0.462647	0.599488	aphi_vs_ctrl
1700025K04Rik	-0.333247	-6.10601	0.113148	0.204832	aphi_vs_ctrl
1700025K24Rik	0.0651553	-4.26219	0.931983	0.952403	aphi_vs_ctrl
1700025M24Rik	0.444399	-5.27799	0.540317	0.666486	aphi_vs_ctrl
1700025N23Rik	-0.308191	-0.454554	0.288325	0.424886	aphi_vs_ctrl
1700026D11Rik	0.177073	-2.57853	0.783795	0.846663	aphi_vs_ctrl
1700026F02Rik	-1.88054	-5.59184	0.0182577	0.0708241	aphi_vs_ctrl
1700026J12Rik	-0.333247	-6.10601	0.113148	0.204832	aphi_vs_ctrl
1700026J14Rik	1.13419	-4.51733	0.216264	0.339587	aphi_vs_ctrl
1700027A15Rik	0.194252	-5.92932	0.66153	0.756942	aphi_vs_ctrl
1700027F06Rik	0.969337	-5.14306	0.168793	0.279651	aphi_vs_ctrl
1700027F09Rik	0.19264	-5.93006	0.666107	0.757602	aphi_vs_ctrl
1700027H10Rik	-0.333247	-6.10601	0.113148	0.204832	aphi_vs_ctrl
1700027I24Rik	0.370268	-4.22075	0.744172	0.817505	aphi_vs_ctrl
1700027J07Rik	1.35845	-5.13491	0.161223	0.269749	aphi_vs_ctrl
1700028B04Rik	-0.260415	-1.30586	0.566003	0.689275	aphi_vs_ctrl
1700028D13Rik	-1.04566	-2.27993	0.163528	0.272693	aphi_vs_ctrl
1700028E10Rik	-0.642467	-1.98476	0.268473	0.402571	aphi_vs_ctrl
1700028I16Rik	0.388539	0.00644656	0.0523735	0.15513	aphi_vs_ctrl
1700028J19Rik	-0.425097	-1.44181	0.271058	0.405338	aphi_vs_ctrl
1700028K03Rik	0.836454	-0.202313	0.115503	0.207911	aphi_vs_ctrl
1700028M03Rik	-0.333247	-6.10601	0.113148	0.204832	aphi_vs_ctrl
1700028P14Rik	4.36428	-1.70282	0.000796752	0.00829765	aphi_vs_ctrl
1700028P15Rik	0.214058	-4.62907	0.736453	0.812171	aphi_vs_ctrl
1700029B22Rik	-0.985581	-4.65504	0.427373	0.572273	aphi_vs_ctrl
1700029F12Rik	-0.736295	-1.32919	0.289857	0.426658	aphi_vs_ctrl
1700029H14Rik	1.32799	-0.701173	0.023053	0.0841126	aphi_vs_ctrl
1700029I15Rik	1.98241	-2.68322	0.0272528	0.0950904	aphi_vs_ctrl
1700029J03Rik	1.66346	-4.91327	0.0037898	0.0229867	aphi_vs_ctrl
1700029J07Rik	-0.546779	-2.22709	0.468923	0.605732	aphi_vs_ctrl
1700029M03Rik	-0.333247	-6.10601	0.113148	0.204832	aphi_vs_ctrl
1700029M20Rik	-0.152362	-0.62846	0.668109	0.759081	aphi_vs_ctrl
1700029N11Rik	0.719109	-5.40163	0.270531	0.404723	aphi_vs_ctrl
1700029P11Rik	-0.986055	3.46082	0.000333026	0.00484912	aphi_vs_ctrl
1700030A11Rik	2.8723	-3.72274	0.000617929	0.00709147	aphi_vs_ctrl
1700030C10Rik	-0.485515	2.18207	0.00727894	0.0366368	aphi_vs_ctrl
1700030C12Rik	-1.06474	-4.45337	0.102292	0.204832	aphi_vs_ctrl
1700030C14Rik	2.38573	-4.08185	0.0109064	0.0486944	aphi_vs_ctrl
1700030F04Rik	-0.737667	-5.26368	0.416315	0.561644	aphi_vs_ctrl
1700030F18Rik	3.19781	-3.76582	0.00579756	0.0310241	aphi_vs_ctrl
1700030J22Rik	0.883721	2.10485	0.00138875	0.0118215	aphi_vs_ctrl
1700030K09Rik	-0.206886	3.9757	0.0187994	0.0723006	aphi_vs_ctrl
1700030L20Rik	0.901627	-1.36978	0.167589	0.278089	aphi_vs_ctrl
1700030L22Rik	0.724797	-5.75337	0.14838	0.252848	aphi_vs_ctrl
1700030M09Rik	-0.200172	-1.21113	0.55916	0.683205	aphi_vs_ctrl
1700030N03Rik	0.604019	-5.79428	0.421821	0.566432	aphi_vs_ctrl
1700030O20Rik	-0.0585654	-5.14554	0.913426	0.9402	aphi_vs_ctrl
1700031A10Rik	0.724112	-5.01764	0.474092	0.610228	aphi_vs_ctrl
1700031F05Rik	0.20331	-5.40123	0.63946	0.746991	aphi_vs_ctrl
1700031L13Rik	-1.10568	-5.84837	0.0898618	0.204832	aphi_vs_ctrl
1700031M16Rik	0.437966	-5.59128	0.455405	0.593719	aphi_vs_ctrl
1700031P21Rik	-0.333247	-6.10601	0.113148	0.204832	aphi_vs_ctrl
1700034B16Rik	-0.333247	-6.10601	0.113148	0.204832	aphi_vs_ctrl
1700034E13Rik	0.193952	-5.75335	0.763817	0.83179	aphi_vs_ctrl
1700034G24Rik	-0.333247	-6.10601	0.113148	0.204832	aphi_vs_ctrl
1700034H15Rik	0.094616	0.595008	0.774448	0.839371	aphi_vs_ctrl
1700034I23Rik	0.0268475	-3.34245	0.968081	0.97795	aphi_vs_ctrl
1700034J05Rik	-0.041297	-1.49864	0.925878	0.948671	aphi_vs_ctrl
1700034K08Rik	-0.517203	-2.54958	0.54978	0.674958	aphi_vs_ctrl
1700034O15Rik	1.74342	-5.23783	0.00848719	0.0409025	aphi_vs_ctrl
1700034P13Rik	-0.689	0.273481	0.014378	0.0599122	aphi_vs_ctrl
1700036A12Rik	-0.858622	-5.93019	0.0671805	0.18541	aphi_vs_ctrl
1700036G14Rik	0.0981587	-2.34611	0.917551	0.942949	aphi_vs_ctrl
1700037C18Rik	0.522957	-0.176051	0.257995	0.390371	aphi_vs_ctrl
1700037H04Rik	-0.32045	4.9662	0.0126211	0.054396	aphi_vs_ctrl
1700039E15Rik	0.808192	-3.93899	0.315146	0.455777	aphi_vs_ctrl
1700039E22Rik	0.193722	-5.44234	0.744656	0.817925	aphi_vs_ctrl
1700039I01Rik	-0.0848762	0.453858	0.827928	0.878755	aphi_vs_ctrl
1700039M10Rik	0.339719	0.733541	0.487607	0.618166	aphi_vs_ctrl
1700040D17Rik	0.390569	-4.63007	0.577701	0.698991	aphi_vs_ctrl
1700040G22Rik	0.642767	-1.50935	0.44028	0.581472	aphi_vs_ctrl
1700040L02Rik	-1.10528	-4.92546	0.0902626	0.204832	aphi_vs_ctrl
1700041A01Rik	0.475196	-3.90813	0.662205	0.75734	aphi_vs_ctrl
1700041B01Rik	-0.333247	-6.10601	0.113148	0.204832	aphi_vs_ctrl
1700041C23Rik	-0.333247	-6.10601	0.113148	0.204832	aphi_vs_ctrl
1700041M19Rik	-0.333247	-6.10601	0.113148	0.204832	aphi_vs_ctrl
1700042G07Rik	1.46665	-4.40923	0.0450388	0.137993	aphi_vs_ctrl
1700042G15Rik	0.14574	-1.72268	0.787212	0.849195	aphi_vs_ctrl
1700042O10Rik	-0.0313502	1.39204	0.865019	0.904977	aphi_vs_ctrl
1700044C05Rik	2.88243	-4.53774	0.0018835	0.0144976	aphi_vs_ctrl
1700044K03Rik	0.665515	-4.73299	0.376082	0.521072	aphi_vs_ctrl
1700045H11Rik	-0.333247	-6.10601	0.113148	0.204832	aphi_vs_ctrl
1700046C09Rik	-0.333247	-6.10601	0.113148	0.204832	aphi_vs_ctrl
1700047A11Rik	0.550548	-2.56088	0.100626	0.204832	aphi_vs_ctrl
1700047E10Rik	0.50358	-3.19053	0.423362	0.568142	aphi_vs_ctrl
1700047G03Rik	-0.0789807	-4.70923	0.916104	0.942072	aphi_vs_ctrl
1700047I17Rik2	0.991146	4.50112	0.000585347	0.00685381	aphi_vs_ctrl
1700047L14Rik	0.193416	-5.49475	0.767019	0.83413	aphi_vs_ctrl
1700047M11Rik	0.383024	-3.7969	0.780784	0.844402	aphi_vs_ctrl
1700048B10Rik	1.12107	-4.41969	0.152884	0.25871	aphi_vs_ctrl
1700048F04Rik	0.0794427	-5.44436	0.814052	0.868513	aphi_vs_ctrl
1700048M11Rik	-0.185005	-3.69523	0.902615	0.932363	aphi_vs_ctrl
1700048O14Rik	-0.333247	-6.10601	0.113148	0.204832	aphi_vs_ctrl
1700048O20Rik	0.130783	1.01342	0.648048	0.748738	aphi_vs_ctrl
1700049E15Rik	-0.333247	-6.10601	0.113148	0.204832	aphi_vs_ctrl
1700049E17Rik1	0.151797	-5.09686	0.853234	0.896538	aphi_vs_ctrl
1700049E17Rik2	0.265612	-4.32645	0.794597	0.855027	aphi_vs_ctrl
1700049E22Rik	1.28963	-1.17958	0.00835942	0.0404128	aphi_vs_ctrl
1700049J03Rik	-0.0177381	-2.24107	0.97593	0.983407	aphi_vs_ctrl
1700049L16Rik	0.723365	-5.184	0.424266	0.569166	aphi_vs_ctrl
1700051A21Rik	1.74701	-2.59504	0.0583381	0.168089	aphi_vs_ctrl
1700052H01Rik	-0.303975	-2.736	0.672902	0.763	aphi_vs_ctrl
1700052I22Rik	0.604018	-5.79428	0.421821	0.566432	aphi_vs_ctrl
1700052K11Rik	0.113503	2.89	0.262518	0.395758	aphi_vs_ctrl
1700054A03Rik	0.720186	-5.57838	0.177711	0.291634	aphi_vs_ctrl
1700054K19Rik	-0.333247	-6.10601	0.113148	0.204832	aphi_vs_ctrl
1700054M17Rik	0.856339	-4.05015	0.361342	0.506189	aphi_vs_ctrl
1700054O19Rik	0.0451091	0.253684	0.887415	0.921477	aphi_vs_ctrl
1700055C04Rik	0.364105	-2.61991	0.65176	0.751874	aphi_vs_ctrl
1700055D18Rik	0.917187	-1.86217	0.256301	0.38849	aphi_vs_ctrl
1700056E22Rik	0.530627	-2.83693	0.659882	0.756942	aphi_vs_ctrl
1700057G04Rik	-0.538092	-4.29109	0.50728	0.636528	aphi_vs_ctrl
1700057H15Rik	2.9297	-4.46981	0.00802165	0.0392658	aphi_vs_ctrl
1700057H21Rik	-0.13491	-0.114956	0.727095	0.804521	aphi_vs_ctrl
1700060C16Rik	-0.862275	-5.75333	0.215831	0.339128	aphi_vs_ctrl
1700060C20Rik	1.51184	-4.9664	0.0809725	0.204832	aphi_vs_ctrl
1700061F12Rik	-0.333247	-6.10601	0.113148	0.204832	aphi_vs_ctrl
1700061G19Rik	-0.711799	5.087	0.000190928	0.00349547	aphi_vs_ctrl
1700061I17Rik	4.24347	-2.37869	0.000209365	0.00368085	aphi_vs_ctrl
1700061J23Rik	0.191402	-5.5781	0.712618	0.793482	aphi_vs_ctrl
1700062C10Rik	0.0799458	-4.4798	0.829971	0.880045	aphi_vs_ctrl
1700063A18Rik	-0.333247	-6.10601	0.113148	0.204832	aphi_vs_ctrl
1700063D05Rik	-0.0680466	0.258727	0.790137	0.851385	aphi_vs_ctrl
1700063H04Rik	-0.0293575	-0.95135	0.907681	0.936103	aphi_vs_ctrl
1700063H06Rik	-0.333247	-6.10601	0.113148	0.204832	aphi_vs_ctrl
1700063O14Rik	0.439418	-5.67096	0.581444	0.701429	aphi_vs_ctrl
1700064F23Rik	0.968622	-5.49636	0.104241	0.204832	aphi_vs_ctrl
1700064J06Rik	0.967953	-4.93657	0.385174	0.530536	aphi_vs_ctrl
1700064M15Rik	-1.38713	-5.57855	0.037718	0.120758	aphi_vs_ctrl
1700065D16Rik	0.67824	-3.61736	0.306288	0.446046	aphi_vs_ctrl
1700065I16Rik	0.720806	-5.75487	0.131444	0.229828	aphi_vs_ctrl
1700065J11Rik	3.06247	-3.59306	0.000925367	0.0091397	aphi_vs_ctrl
1700065J18Rik	-0.333247	-6.10601	0.113148	0.204832	aphi_vs_ctrl
1700065L07Rik	-0.333247	-6.10601	0.113148	0.204832	aphi_vs_ctrl
1700065O20Rik	-0.333588	-5.75278	0.46249	0.599488	aphi_vs_ctrl
1700066B17Rik	-0.143182	-3.48756	0.833777	0.882838	aphi_vs_ctrl
1700066B19Rik	0.53181	1.34396	0.0657734	0.183888	aphi_vs_ctrl
1700066C05Rik	-0.399711	1.00958	0.11552	0.207915	aphi_vs_ctrl
1700066J03Rik	-0.397523	-2.33855	0.414856	0.560471	aphi_vs_ctrl
1700066M21Rik	0.157697	3.81167	0.0944045	0.204832	aphi_vs_ctrl
1700066N21Rik	-1.784	-4.61547	0.10755	0.204832	aphi_vs_ctrl
1700066O22Rik	-0.0495612	-4.65619	0.96666	0.976951	aphi_vs_ctrl
1700067G17Rik	0.615322	-3.94584	0.548992	0.674267	aphi_vs_ctrl
1700067K01Rik	-0.534446	0.494257	0.0113369	0.0502257	aphi_vs_ctrl
1700067P10Rik	1.54005	-5.17082	0.11021	0.204832	aphi_vs_ctrl
1700069L16Rik	-1.88399	-3.958	0.0363082	0.117452	aphi_vs_ctrl
1700069P05Rik	-0.333247	-6.10601	0.113148	0.204832	aphi_vs_ctrl
1700071G01Rik	0.600051	-4.35791	0.550979	0.675996	aphi_vs_ctrl
1700071K01Rik	0.196333	-5.01684	0.846375	0.891576	aphi_vs_ctrl
1700071M16Rik	1.58737	-3.46003	0.238401	0.367252	aphi_vs_ctrl
1700072B07Rik	0.190566	-5.93082	0.646491	0.74773	aphi_vs_ctrl
1700072I22Rik	0.467614	-5.83875	0.468104	0.604868	aphi_vs_ctrl
1700072O05Rik	-0.333247	-6.10601	0.113148	0.204832	aphi_vs_ctrl
1700073E17Rik	1.35753	-2.62671	0.00113892	0.0104261	aphi_vs_ctrl
1700074H08Rik	1.4428	-5.25924	0.101529	0.204832	aphi_vs_ctrl
1700074P13Rik	-0.333247	-6.10601	0.113148	0.204832	aphi_vs_ctrl
1700080E11Rik	-0.333247	-6.10601	0.113148	0.204832	aphi_vs_ctrl
1700080G11Rik	0.389684	-0.00905814	0.462389	0.599488	aphi_vs_ctrl
1700080G18Rik	-0.751115	-1.27525	0.0501036	0.14983	aphi_vs_ctrl
1700080N15Rik	-0.333247	-6.10601	0.113148	0.204832	aphi_vs_ctrl
1700080O16Rik	0.462861	0.235001	0.0169307	0.0670794	aphi_vs_ctrl
1700081B01Rik	0.704484	-5.57646	0.238949	0.36794	aphi_vs_ctrl
1700081H04Rik	0.194253	-5.92932	0.66153	0.756942	aphi_vs_ctrl
1700083H02Rik	-0.333247	-6.10601	0.113148	0.204832	aphi_vs_ctrl
1700084D21Rik	0.237525	-2.06903	0.637042	0.745621	aphi_vs_ctrl
1700084E18Rik	0.580078	-2.24411	0.341711	0.485394	aphi_vs_ctrl
1700084F23Rik	-0.331437	-5.75517	0.623051	0.735049	aphi_vs_ctrl
1700084J12Rik	0.41483	-3.69824	0.552803	0.677568	aphi_vs_ctrl
1700084M14Rik	-0.333247	-6.10601	0.113148	0.204832	aphi_vs_ctrl
1700085C21Rik	-0.333247	-6.10601	0.113148	0.204832	aphi_vs_ctrl
1700086D15Rik	-0.245399	1.67635	0.394604	0.540193	aphi_vs_ctrl
1700086L19Rik	1.9019	-4.92512	0.00801156	0.0392258	aphi_vs_ctrl
1700086O06Rik	0.282236	0.839346	0.308617	0.448648	aphi_vs_ctrl
1700086P04Rik	0.357681	1.40797	0.114734	0.20686	aphi_vs_ctrl
1700087I21Rik	0.216962	1.7477	0.256791	0.38894	aphi_vs_ctrl
1700087M22Rik	-1.11069	-5.27846	0.257049	0.389297	aphi_vs_ctrl
1700088E04Rik	0.690609	-0.955646	0.0964853	0.204832	aphi_vs_ctrl
1700091H14Rik	-0.918732	-5.12428	0.301018	0.439734	aphi_vs_ctrl
1700092C02Rik	-0.333247	-6.10601	0.113148	0.204832	aphi_vs_ctrl
1700092C10Rik	-0.333218	-5.92952	0.429973	0.573062	aphi_vs_ctrl
1700092E19Rik	0.443412	-5.67074	0.578561	0.699	aphi_vs_ctrl
1700092K14Rik	0.967591	-5.67339	0.106971	0.204832	aphi_vs_ctrl
1700092M07Rik	0.763193	-1.72629	0.196864	0.315647	aphi_vs_ctrl
1700093K21Rik	1.33183	-2.30801	0.0457654	0.139657	aphi_vs_ctrl
1700094D03Rik	0.295474	2.26827	0.242713	0.372342	aphi_vs_ctrl
1700094J05Rik	-0.877227	-2.99428	0.233413	0.361014	aphi_vs_ctrl
1700094M23Rik	1.61077	-5.05007	0.021011	0.0786043	aphi_vs_ctrl
1700094M24Rik	-0.333247	-6.10601	0.113148	0.204832	aphi_vs_ctrl
1700095A13Rik	-0.333247	-6.10601	0.113148	0.204832	aphi_vs_ctrl
1700095A21Rik	-0.00220284	3.63536	0.992771	0.995109	aphi_vs_ctrl
1700095B10Rik	0.548954	-3.08101	0.280668	0.416334	aphi_vs_ctrl
1700095J03Rik	1.08041	-4.30738	0.255379	0.38753	aphi_vs_ctrl
1700095J12Rik	0.297393	-4.50251	0.695882	0.781268	aphi_vs_ctrl
1700096J18Rik	1.27288	-3.19443	0.0292465	0.100176	aphi_vs_ctrl
1700096K18Rik	-0.708349	0.694058	0.0154744	0.0631065	aphi_vs_ctrl
1700096P03Rik	0.403579	-4.61613	0.66122	0.756942	aphi_vs_ctrl
1700097N02Rik	-1.34618	4.98762	6.64868e-05	0.00207196	aphi_vs_ctrl
1700099I09Rik	0.489677	-4.64341	0.620853	0.733305	aphi_vs_ctrl
1700100I10Rik	-0.370464	-1.47508	0.381776	0.527121	aphi_vs_ctrl
1700100L14Rik	-1.63291	-5.49753	0.0220936	0.0814415	aphi_vs_ctrl
1700101G07Rik	-0.150481	-4.59543	0.625923	0.736994	aphi_vs_ctrl
1700101I11Rik	-0.0863785	-5.23798	0.916916	0.942505	aphi_vs_ctrl
1700101O22Rik	-0.333247	-6.10601	0.113148	0.204832	aphi_vs_ctrl
1700102H20Rik	0.549297	-1.65529	0.278728	0.414051	aphi_vs_ctrl
1700102J08Rik	0.185919	-1.02032	0.679871	0.768595	aphi_vs_ctrl
1700102P08Rik	-0.14495	1.1783	0.3832	0.528545	aphi_vs_ctrl
1700104L18Rik	1.13049	-5.08999	0.338518	0.481965	aphi_vs_ctrl
1700105P06Rik	1.04095	-2.4928	0.318892	0.459925	aphi_vs_ctrl
1700108F19Rik	0.834003	2.5021	0.00241825	0.0170241	aphi_vs_ctrl
1700108J01Rik	-0.578818	-5.4974	0.487794	0.618322	aphi_vs_ctrl
1700108N06Rik	0.681869	-3.23584	0.367819	0.512763	aphi_vs_ctrl
1700109G14Rik	4.70059	-2.49691	9.01223e-06	0.00100296	aphi_vs_ctrl
1700109G15Rik	0.437114	-5.84912	0.462647	0.599488	aphi_vs_ctrl
1700109H08Rik	0.250358	-1.1772	0.717424	0.797189	aphi_vs_ctrl
1700109I08Rik	-0.333247	-6.10601	0.113148	0.204832	aphi_vs_ctrl
1700109K24Rik	0.244406	0.642429	0.120365	0.214584	aphi_vs_ctrl
1700110C19Rik	2.02265	-3.46666	0.00382531	0.0231174	aphi_vs_ctrl
1700110I01Rik	1.0784	-3.21963	0.35941	0.504267	aphi_vs_ctrl
1700110I07Rik	-0.185645	-1.95401	0.475054	0.611143	aphi_vs_ctrl
1700110K17Rik	1.77086	-1.88523	0.0997666	0.204832	aphi_vs_ctrl
1700111N16Rik	-0.522471	-2.9064	0.474481	0.6106	aphi_vs_ctrl
1700112D23Rik	1.53229	-2.73228	0.0439024	0.13544	aphi_vs_ctrl
1700112E06Rik	2.83206	-2.27968	0.0224758	0.0825641	aphi_vs_ctrl
1700112H15Rik	0.19264	-5.93006	0.666107	0.757602	aphi_vs_ctrl
1700112J05Rik	-0.332633	-5.92241	0.458367	0.596441	aphi_vs_ctrl
1700112J16Rik	0.743364	0.0482283	0.109017	0.204832	aphi_vs_ctrl
1700112N08Rik	-1.20394	-4.58757	0.238386	0.367245	aphi_vs_ctrl
1700113A16Rik	-0.377507	-0.160459	0.146959	0.250913	aphi_vs_ctrl
1700113B09Rik	1.40279	-2.60363	0.0585187	0.168466	aphi_vs_ctrl
1700113H08Rik	0.656593	-5.43477	0.394167	0.539836	aphi_vs_ctrl
1700116B05Rik	-0.333471	-5.67082	0.543521	0.669252	aphi_vs_ctrl
1700116H05Rik	0.0540887	-3.28035	0.917495	0.94294	aphi_vs_ctrl
1700119H24Rik	2.27183	-4.6143	0.0135826	0.0575256	aphi_vs_ctrl
1700120C14Rik	-0.779609	-1.83624	0.0369205	0.118806	aphi_vs_ctrl
1700120E14Rik	0.194254	-5.92932	0.661529	0.756942	aphi_vs_ctrl
1700120G07Rik	-0.27124	-3.78125	0.735551	0.811473	aphi_vs_ctrl
1700120K04Rik	0.952256	-2.72447	0.075783	0.202691	aphi_vs_ctrl
1700121L16Rik	0.203371	-1.46395	0.582665	0.702294	aphi_vs_ctrl
1700121N20Rik	0.441597	-5.41293	0.639982	0.747393	aphi_vs_ctrl
1700122C19Rik	-0.100042	-4.747	0.877583	0.914032	aphi_vs_ctrl
1700122E12Rik	-0.0251848	0.637546	0.926558	0.949099	aphi_vs_ctrl
1700122H20Rik	0.708535	-5.30007	0.480885	0.613627	aphi_vs_ctrl
1700122O11Rik	-1.63216	-5.49762	0.0342533	0.112322	aphi_vs_ctrl
1700123J17Rik	0.637975	-1.53691	0.00768069	0.0380756	aphi_vs_ctrl
1700123K08Rik	0.251137	-5.16183	0.869014	0.908018	aphi_vs_ctrl
1700123L14Rik	1.36053	-4.8144	0.0190872	0.0730473	aphi_vs_ctrl
1700123M08Rik	0.0181399	-2.17994	0.957185	0.970079	aphi_vs_ctrl
1700123O12Rik	0.350584	-5.02259	0.742667	0.81659	aphi_vs_ctrl
1700123O20Rik	-0.161642	5.18608	0.21907	0.343071	aphi_vs_ctrl
1700123O21Rik	-0.333247	-6.10601	0.113148	0.204832	aphi_vs_ctrl
1700124L16Rik	0.959419	-3.39791	0.0497815	0.149077	aphi_vs_ctrl
1700124M09Rik	-0.333247	-6.10601	0.113148	0.204832	aphi_vs_ctrl
1700125G02Rik	0.190565	-5.93082	0.646491	0.74773	aphi_vs_ctrl
1700125G22Rik	0.350075	-1.40342	0.394455	0.54007	aphi_vs_ctrl
1700125H03Rik	0.968183	-4.9111	0.214375	0.337265	aphi_vs_ctrl
1700125H20Rik	1.59654	-0.574773	0.00360251	0.0221597	aphi_vs_ctrl
1700126G02Rik	1.09462	-0.99035	0.00270751	0.0183043	aphi_vs_ctrl
1700126H18Rik	0.190565	-5.93082	0.646492	0.74773	aphi_vs_ctrl
1700128A07Rik	1.30186	-3.9825	0.0308608	0.10424	aphi_vs_ctrl
1700128E19Rik	0.197125	-5.6716	0.810811	0.866292	aphi_vs_ctrl
1700128F08Rik	0.344603	0.830151	0.156659	0.263679	aphi_vs_ctrl
1700129C05Rik	-0.333247	-6.10601	0.113148	0.204832	aphi_vs_ctrl
1810006J02Rik	-0.333219	-5.84756	0.570041	0.69234	aphi_vs_ctrl
1810007C17Rik	-0.333757	-5.92927	0.481908	0.613627	aphi_vs_ctrl
1810007D17Rik	0.0374636	-1.52336	0.850709	0.894843	aphi_vs_ctrl
1810008I18Rik	-0.86009	-5.75422	0.196717	0.315529	aphi_vs_ctrl
1810009A15Rik	-0.748094	5.97096	0.00420522	0.0246623	aphi_vs_ctrl
1810009J06Rik	-0.333247	-6.10601	0.113148	0.204832	aphi_vs_ctrl
1810009N02Rik	-0.383144	-0.715696	0.232371	0.359756	aphi_vs_ctrl
1810010D01Rik	0.852846	-4.84309	0.42008	0.564996	aphi_vs_ctrl
1810010H24Rik	0.115475	0.0738908	0.539089	0.665222	aphi_vs_ctrl
1810011H11Rik	0.724808	-5.75337	0.148392	0.252848	aphi_vs_ctrl
1810011O10Rik	1.36272	-0.669972	0.00312546	0.020147	aphi_vs_ctrl
1810012K16Rik	0.743133	-2.93722	0.206926	0.327869	aphi_vs_ctrl
1810013A23Rik	0.960587	-4.39874	0.415452	0.560962	aphi_vs_ctrl
1810013D15Rik	0.0985558	-0.145616	0.659143	0.756942	aphi_vs_ctrl
1810013L24Rik	-0.263703	5.81576	0.0978514	0.204832	aphi_vs_ctrl
1810014B01Rik	-0.395297	1.70236	0.0704122	0.191996	aphi_vs_ctrl
1810018F18Rik	1.96333	-4.65025	0.0235446	0.0853719	aphi_vs_ctrl
1810019D21Rik	0.947681	0.939922	0.0100353	0.0460151	aphi_vs_ctrl
1810019N24Rik	-0.54017	-1.45794	0.0291061	0.0998708	aphi_vs_ctrl
1810020O05Rik	1.68284	-0.593086	0.0144638	0.0601265	aphi_vs_ctrl
1810021B22Rik	1.77729	-4.54152	0.0488483	0.146963	aphi_vs_ctrl
1810021M19Rik	0.426219	-0.152614	0.433003	0.576143	aphi_vs_ctrl
1810022K09Rik	-0.536258	5.74058	0.116699	0.209515	aphi_vs_ctrl
1810024B03Rik	-0.00739623	-0.760762	0.978705	0.985298	aphi_vs_ctrl
1810026B05Rik	-0.0834978	3.36381	0.712379	0.793301	aphi_vs_ctrl
1810030O07Rik	-0.582457	5.33016	0.000258214	0.00416935	aphi_vs_ctrl
1810032O08Rik	-0.229097	4.90008	0.408858	0.554294	aphi_vs_ctrl
1810034E14Rik	0.229975	-2.37898	0.59177	0.709578	aphi_vs_ctrl
1810035K13Rik	-0.333247	-6.10601	0.113148	0.204832	aphi_vs_ctrl
1810037I17Rik	0.268954	5.98548	0.075052	0.201391	aphi_vs_ctrl
1810041H14Rik	-0.141491	-1.03978	0.724511	0.802525	aphi_vs_ctrl
1810041L15Rik	3.64704	2.41825	1.59627e-05	0.00122581	aphi_vs_ctrl
1810043G02Rik	0.10471	2.54762	0.26387	0.397268	aphi_vs_ctrl
1810044D09Rik	-0.620161	0.0294189	0.0241969	0.0870305	aphi_vs_ctrl
1810046K07Rik	-0.333247	-6.10601	0.113148	0.204832	aphi_vs_ctrl
1810049I09Rik	-0.333219	-5.84756	0.570042	0.69234	aphi_vs_ctrl
1810053B23Rik	-1.21382	-4.62375	0.0238534	0.0861744	aphi_vs_ctrl
1810055G02Rik	-0.0807627	4.62422	0.542879	0.668713	aphi_vs_ctrl
1810058I24Rik	-0.503307	5.08183	0.00151256	0.0124921	aphi_vs_ctrl
1810062G17Rik	1.74913	-5.06252	0.0561678	0.163517	aphi_vs_ctrl
1810062O18Rik	0.300032	-2.62231	0.666259	0.757685	aphi_vs_ctrl
1810063I02Rik	1.43916	-2.70058	0.0439995	0.135674	aphi_vs_ctrl
1810064F22Rik	0.73392	0.0164753	0.16503	0.274655	aphi_vs_ctrl
1810065E05Rik	-0.333247	-6.10601	0.113148	0.204832	aphi_vs_ctrl
1810073O08Rik	2.12072	-3.45131	0.135626	0.235589	aphi_vs_ctrl
2010001A14Rik	0.081518	1.29347	0.647091	0.748122	aphi_vs_ctrl
2010003K11Rik	0.195133	-5.57661	0.717882	0.797502	aphi_vs_ctrl
2010005H15Rik	-0.333247	-6.10601	0.113148	0.204832	aphi_vs_ctrl
2010009K17Rik	-1.22964	-3.98009	0.13278	0.231671	aphi_vs_ctrl
2010010A06Rik	0.654649	-0.417174	0.188459	0.305106	aphi_vs_ctrl
2010016I18Rik	-0.0774157	-5.47044	0.931609	0.952192	aphi_vs_ctrl
2010106C02Rik	1.25996	-5.57795	0.107621	0.204832	aphi_vs_ctrl
2010106E10Rik	-0.332654	-5.93004	0.443149	0.581472	aphi_vs_ctrl
2010107E04Rik	-0.358895	5.86797	0.124036	0.219839	aphi_vs_ctrl
2010107G12Rik	0.626871	-0.634485	0.0241915	0.087026	aphi_vs_ctrl
2010107G23Rik	-0.337316	1.9029	0.0107961	0.048417	aphi_vs_ctrl
2010109A12Rik	0.0699745	-4.57414	0.919564	0.944227	aphi_vs_ctrl
2010109I03Rik	0.091469	-1.33912	0.798191	0.857746	aphi_vs_ctrl
2010110K18Rik	0.682263	-0.537871	0.0340606	0.111812	aphi_vs_ctrl
2010111I01Rik	0.365632	5.20312	0.00190834	0.0146111	aphi_vs_ctrl
2010203P06Rik	1.71796	-4.5434	0.0425581	0.132259	aphi_vs_ctrl
2010204K13Rik	-0.920478	2.06819	0.0129907	0.0556247	aphi_vs_ctrl
2010300C02Rik	3.24227	1.28676	3.58304e-05	0.00157085	aphi_vs_ctrl
2010308F09Rik	0.315301	-4.35209	0.704627	0.787761	aphi_vs_ctrl
2010310C07Rik	0.19349	-5.49643	0.745039	0.818222	aphi_vs_ctrl
2010315B03Rik	0.556611	0.478752	0.108776	0.204832	aphi_vs_ctrl
2010320M18Rik	-0.197245	2.12005	0.135898	0.235983	aphi_vs_ctrl
2010320O07Rik	2.48146	-2.52604	0.0236343	0.085577	aphi_vs_ctrl
2200002D01Rik	0.68316	1.73479	0.00489795	0.0275974	aphi_vs_ctrl
2200002J24Rik	1.21667	-3.86723	0.120125	0.21441	aphi_vs_ctrl
2210008F06Rik	1.38926	-3.94162	0.0963013	0.204832	aphi_vs_ctrl
2210010C04Rik	-0.0403765	-1.29451	0.953357	0.967399	aphi_vs_ctrl
2210011C24Rik	-0.0867161	1.89628	0.756865	0.827391	aphi_vs_ctrl
2210011K15Rik	-0.333247	-6.10601	0.113148	0.204832	aphi_vs_ctrl
2210013O21Rik	0.299316	2.97437	0.0539355	0.158653	aphi_vs_ctrl
2210016F16Rik	0.00389931	4.91484	0.971705	0.98046	aphi_vs_ctrl
2210016L21Rik	-0.109436	4.36459	0.312258	0.45236	aphi_vs_ctrl
2210019I11Rik	2.21818	-4.43238	0.00320467	0.0204751	aphi_vs_ctrl
2210039B01Rik	0.177764	-0.141169	0.519003	0.646992	aphi_vs_ctrl
2210404E10Rik	2.22674	-4.55569	0.00371593	0.0226418	aphi_vs_ctrl
2210406O10Rik	1.27757	-1.00093	0.0015453	0.0126538	aphi_vs_ctrl
2210407C18Rik	0.19317	-5.75408	0.768003	0.834648	aphi_vs_ctrl
2210408F21Rik	0.0784807	-3.80805	0.832998	0.882208	aphi_vs_ctrl
2210408I21Rik	0.8707	2.29694	0.00324551	0.0206268	aphi_vs_ctrl
2210409D07Rik	0.444366	-5.49525	0.617287	0.730704	aphi_vs_ctrl
2210409E12Rik	0.0584232	3.03304	0.794304	0.854857	aphi_vs_ctrl
2210414B05Rik	-0.333771	-5.84725	0.60385	0.719054	aphi_vs_ctrl
2210416O15Rik	-0.00759515	-3.32224	0.991461	0.994182	aphi_vs_ctrl
2210417A02Rik	0.116573	0.113135	0.448557	0.586949	aphi_vs_ctrl
2210418O10Rik	0.124823	6.14157	0.105454	0.204832	aphi_vs_ctrl
2210420H20Rik	0.269172	-1.67331	0.351495	0.495623	aphi_vs_ctrl
2300002M23Rik	0.819373	-1.45345	0.0160045	0.0645349	aphi_vs_ctrl
2300003K06Rik	0.197803	-5.61719	0.822418	0.87478	aphi_vs_ctrl
2300009A05Rik	-0.288987	0.257794	0.353199	0.497308	aphi_vs_ctrl
2310001H17Rik	0.427626	-4.60957	0.686991	0.774004	aphi_vs_ctrl
2310001K24Rik	1.48448	-4.18204	0.180442	0.29508	aphi_vs_ctrl
2310002D06Rik	-1.10344	-5.49844	0.10825	0.204832	aphi_vs_ctrl
2310002F09Rik	0.609476	-4.47337	0.527408	0.654289	aphi_vs_ctrl
2310002L09Rik	-0.333247	-6.10601	0.113148	0.204832	aphi_vs_ctrl
2310003N18Rik	0.493378	-5.37532	0.709663	0.791557	aphi_vs_ctrl
2310005A03Rik	-0.421349	-1.13964	0.236513	0.364888	aphi_vs_ctrl
2310005E17Rik	2.10318	-3.52928	0.00646471	0.0335903	aphi_vs_ctrl
2310007B03Rik	4.60237	-2.24517	0.00179334	0.014048	aphi_vs_ctrl
2310008N11Rik	3.91734	-2.23499	1.95016e-05	0.00128444	aphi_vs_ctrl
2310009A05Rik	-0.309563	2.26187	0.314756	0.455349	aphi_vs_ctrl
2310009B15Rik	-0.427498	1.90187	0.0264387	0.0929215	aphi_vs_ctrl
2310010J17Rik	-0.112302	0.269319	0.683375	0.771351	aphi_vs_ctrl
2310011J03Rik	-0.55978	4.3387	0.0111925	0.0497185	aphi_vs_ctrl
2310014F06Rik	-0.120517	-3.28993	0.854952	0.897977	aphi_vs_ctrl
2310015A10Rik	-0.994651	1.60579	0.00668025	0.0343891	aphi_vs_ctrl
2310015A16Rik	1.22854	-2.97905	0.171814	0.28376	aphi_vs_ctrl
2310015D24Rik	1.22124	-3.45784	0.430622	0.573777	aphi_vs_ctrl
2310015K22Rik	0.712579	-1.39534	0.0731428	0.197573	aphi_vs_ctrl
2310016D03Rik	-0.859125	-5.75345	0.084776	0.204832	aphi_vs_ctrl
2310016D23Rik	-0.321625	-4.98114	0.70772	0.790364	aphi_vs_ctrl
2310016G11Rik	0.110749	-2.54418	0.893913	0.926098	aphi_vs_ctrl
2310020H05Rik	-0.859682	-5.75422	0.196906	0.315686	aphi_vs_ctrl
2310022A10Rik	-0.108018	4.04445	0.686307	0.7734	aphi_vs_ctrl
2310022B05Rik	-0.762651	4.30309	0.0075554	0.0375941	aphi_vs_ctrl
2310026I22Rik	-0.333247	-6.10601	0.113148	0.204832	aphi_vs_ctrl
2310030A07Rik	1.35836	-4.75085	0.291297	0.428516	aphi_vs_ctrl
2310030G06Rik	0.496096	2.05854	0.0998153	0.204832	aphi_vs_ctrl
2310033P09Rik	-0.202507	3.1383	0.332002	0.474688	aphi_vs_ctrl
2310034C09Rik	-0.333247	-6.10601	0.113148	0.204832	aphi_vs_ctrl
2310034G01Rik	-0.505263	-1.16323	0.478967	0.613627	aphi_vs_ctrl
2310034O05Rik	0.749201	-2.26331	0.0995676	0.204832	aphi_vs_ctrl
2310034P14Rik	-0.251027	-0.660741	0.542613	0.66843	aphi_vs_ctrl
2310035C23Rik	-0.0573907	5.79992	0.149759	0.254494	aphi_vs_ctrl
2310036O22Rik	-0.436205	6.08566	0.0080396	0.0393058	aphi_vs_ctrl
2310039H08Rik	-0.610518	2.35752	0.111427	0.204832	aphi_vs_ctrl
2310039L15Rik	-0.626242	-0.494954	0.0416619	0.130363	aphi_vs_ctrl
2310040G24Rik	-0.277583	1.21458	0.0900871	0.204832	aphi_vs_ctrl
2310043L19Rik	0.190566	-5.93082	0.646491	0.74773	aphi_vs_ctrl
2310043O21Rik	-0.333427	-5.41281	0.244745	0.374918	aphi_vs_ctrl
2310045n01rik-mef2b	-0.63316	-0.0534069	0.281665	0.417437	aphi_vs_ctrl
2310047D07Rik	0.162691	-1.20768	0.711567	0.792939	aphi_vs_ctrl
2310050C09Rik	-0.332923	-5.67142	0.553901	0.678529	aphi_vs_ctrl
2310057J18Rik	-1.09946	-5.53675	0.322281	0.463476	aphi_vs_ctrl
2310057M21Rik	0.316842	3.86233	0.0492892	0.147921	aphi_vs_ctrl
2310057N15Rik	-0.333247	-6.10601	0.113148	0.204832	aphi_vs_ctrl
2310061I04Rik	-1.37965	3.12053	6.91543e-06	0.000909542	aphi_vs_ctrl
2310061N02Rik	-0.333247	-6.10601	0.113148	0.204832	aphi_vs_ctrl
2310065F04Rik	-0.333247	-6.10601	0.113148	0.204832	aphi_vs_ctrl
2310067E19Rik	-1.01721	0.775866	0.00136591	0.0117045	aphi_vs_ctrl
2310068J16Rik	-0.545462	-1.25416	0.17385	0.286508	aphi_vs_ctrl
2310069B03Rik	0.864395	-0.0213467	0.00258828	0.0178463	aphi_vs_ctrl
2310069G16Rik	1.20973	-4.80507	0.0841982	0.204832	aphi_vs_ctrl
2310075C17Rik	-0.0639806	-3.63534	0.859225	0.901131	aphi_vs_ctrl
2310075K07Rik	-0.268836	-0.439435	0.278674	0.414005	aphi_vs_ctrl
2310079G19Rik	-0.333247	-6.10601	0.113148	0.204832	aphi_vs_ctrl
2310081J21Rik	-0.332617	-5.91381	0.474828	0.610937	aphi_vs_ctrl
2400006E01Rik	-0.196763	2.70834	0.339146	0.482555	aphi_vs_ctrl
2410002F23Rik	-0.483325	6.5799	0.00104374	0.00984383	aphi_vs_ctrl
2410003L11Rik	-0.424978	4.02717	0.026347	0.0926719	aphi_vs_ctrl
2410004B18Rik	-0.501309	4.09334	0.0182615	0.0708256	aphi_vs_ctrl
2410004I01Rik	1.83876	0.0250787	0.000182782	0.0034201	aphi_vs_ctrl
2410004P03Rik	0.659327	0.911299	0.0610464	0.174008	aphi_vs_ctrl
2410006H16Rik	-0.102277	5.68763	0.665245	0.757602	aphi_vs_ctrl
2410012E07Rik	-0.778207	-4.21907	0.275958	0.410746	aphi_vs_ctrl
2410015M20Rik	-0.2009	5.48926	0.219575	0.343757	aphi_vs_ctrl
2410016O06Rik	-0.702364	4.49244	0.00576689	0.030924	aphi_vs_ctrl
2410017I17Rik	2.8828	-3.45789	0.000211782	0.00370762	aphi_vs_ctrl
2410018L13Rik	-0.461475	-1.29404	0.168709	0.279538	aphi_vs_ctrl
2410021H03Rik	0.573042	0.576364	0.0992443	0.204832	aphi_vs_ctrl
2410022M11Rik	-0.95005	0.342931	0.0636966	0.179455	aphi_vs_ctrl
2410080I02Rik	-0.407977	1.13191	0.0386309	0.123051	aphi_vs_ctrl
2410089E03Rik	0.250445	5.37103	0.228128	0.354401	aphi_vs_ctrl
2410124H12Rik	2.77104	-0.982576	0.00123457	0.0109641	aphi_vs_ctrl
2410131K14Rik	-0.425412	3.88754	0.0254814	0.0903654	aphi_vs_ctrl
2410137M14Rik	-0.782627	3.44677	2.74563e-05	0.00141261	aphi_vs_ctrl
2410141K09Rik	0.117609	5.9712	0.295932	0.433976	aphi_vs_ctrl
2500002B13Rik	-0.267626	3.93863	0.0249528	0.0889882	aphi_vs_ctrl
2500004C02Rik	-0.294674	1.39473	0.176325	0.289807	aphi_vs_ctrl
2510002D24Rik	-0.0963749	3.13836	0.420358	0.565243	aphi_vs_ctrl
2510003B16Rik	1.05985	-0.352007	0.000557521	0.00666832	aphi_vs_ctrl
2510009E07Rik	0.119488	2.83195	0.458747	0.596786	aphi_vs_ctrl
2510039O18Rik	-0.298066	6.17491	0.0157277	0.0638877	aphi_vs_ctrl
2610001J05Rik	0.0190667	3.61374	0.875582	0.912781	aphi_vs_ctrl
2610002M06Rik	0.376938	1.70164	0.062672	0.177384	aphi_vs_ctrl
2610005L07Rik	-0.340402	6.72602	0.105015	0.204832	aphi_vs_ctrl
2610008E11Rik	0.367281	3.62023	0.0635919	0.179342	aphi_vs_ctrl
2610016A17Rik	1.48933	-4.90913	0.133836	0.233153	aphi_vs_ctrl
2610020C07Rik	0.0515291	0.976787	0.871779	0.910101	aphi_vs_ctrl
2610020H08Rik	0.128947	3.02474	0.511782	0.640307	aphi_vs_ctrl
2610021A01Rik	0.0386138	6.23853	0.526251	0.653327	aphi_vs_ctrl
2610027F03Rik	2.09782	-2.30308	0.0603792	0.172487	aphi_vs_ctrl
2610027K06Rik	0.115794	-3.81911	0.895848	0.927463	aphi_vs_ctrl
2610028E06Rik	0.144567	-1.78869	0.752526	0.824217	aphi_vs_ctrl
2610028H24Rik	0.967129	-1.55513	0.0922043	0.204832	aphi_vs_ctrl
2610035D17Rik	0.404204	0.552077	0.101846	0.204832	aphi_vs_ctrl
2610035F20Rik	-1.37084	0.262878	0.000100867	0.00251779	aphi_vs_ctrl
2610036A22Rik	0.115736	6.4816	0.578339	0.698991	aphi_vs_ctrl
2610037D02Rik	0.828073	1.15081	0.00807798	0.0394401	aphi_vs_ctrl
2610042L04Rik	0.414385	1.97745	0.0604106	0.172549	aphi_vs_ctrl
2610044O15Rik8	0.451962	3.25166	0.000719111	0.00780363	aphi_vs_ctrl
2610203C22Rik	0.297254	-1.94396	0.692908	0.778777	aphi_vs_ctrl
2610206C17Rik	-0.344625	-1.27637	0.268754	0.402974	aphi_vs_ctrl
2610300M13Rik	1.30572	-2.5189	0.0735762	0.198447	aphi_vs_ctrl
2610301B20Rik	-0.229416	3.88829	0.0213011	0.0794104	aphi_vs_ctrl
2610305D13Rik	1.64874	4.28646	0.0531854	0.156893	aphi_vs_ctrl
2610306M01Rik	0.0849441	0.905918	0.800247	0.859131	aphi_vs_ctrl
2610307P16Rik	0.940086	-0.487935	0.024273	0.0872086	aphi_vs_ctrl
2610316D01Rik	0.177783	-4.81342	0.874844	0.912169	aphi_vs_ctrl
2610318N02Rik	-1.09296	3.54333	0.000196452	0.00354564	aphi_vs_ctrl
2610507B11Rik	-0.374299	8.56028	0.0123513	0.0535952	aphi_vs_ctrl
2610507I01Rik	-0.239476	0.0424512	0.43292	0.576086	aphi_vs_ctrl
2610524H06Rik	-0.596693	3.58746	0.00740586	0.0370495	aphi_vs_ctrl
2610528A11Rik	-0.239625	-3.58697	0.745147	0.818291	aphi_vs_ctrl
2610528J11Rik	1.35626	-2.20437	0.00516995	0.0286345	aphi_vs_ctrl
26Sor	0.166884	0.853337	0.44979	0.588179	aphi_vs_ctrl
2700012I20Rik	-0.0405178	0.11673	0.919934	0.944483	aphi_vs_ctrl
2700038G22Rik	-0.611766	3.21997	0.00589036	0.0313814	aphi_vs_ctrl
2700046A07Rik	0.324363	-3.30218	0.629807	0.740098	aphi_vs_ctrl
2700046G09Rik	-0.151345	-0.148507	0.499892	0.62946	aphi_vs_ctrl
2700049A03Rik	-0.020626	5.68962	0.721305	0.800051	aphi_vs_ctrl
2700054A10Rik	0.0927029	-0.0264618	0.772989	0.838247	aphi_vs_ctrl
2700060E02Rik	-0.466796	7.70485	0.00250561	0.0174649	aphi_vs_ctrl
2700062C07Rik	-0.274784	4.41761	0.0274525	0.0956119	aphi_vs_ctrl
2700069I18Rik	-0.23323	-1.5353	0.604979	0.719982	aphi_vs_ctrl
2700070H01Rik	0.257238	0.563149	0.570735	0.692878	aphi_vs_ctrl
2700081O15Rik	-0.990545	4.47173	2.58883e-06	0.000845882	aphi_vs_ctrl
2700089I24Rik	0.531765	-3.67435	0.0823814	0.204832	aphi_vs_ctrl
2700097O09Rik	0.00298227	4.44708	0.978	0.984886	aphi_vs_ctrl
2700099C18Rik	-0.584366	3.34033	0.011256	0.049947	aphi_vs_ctrl
2810001G20Rik	0.0329686	1.0625	0.860242	0.901923	aphi_vs_ctrl
2810002D19Rik	0.0298552	1.1144	0.852125	0.895762	aphi_vs_ctrl
2810004N23Rik	-0.476467	6.51434	0.0189561	0.0726996	aphi_vs_ctrl
2810006K23Rik	-0.0994582	4.23231	0.405151	0.550716	aphi_vs_ctrl
2810013P06Rik	-0.826493	2.86701	0.0012829	0.0112297	aphi_vs_ctrl
2810021J22Rik	-0.295865	3.8636	0.00681025	0.0348846	aphi_vs_ctrl
2810025M15Rik	-0.27713	5.44841	0.105312	0.204832	aphi_vs_ctrl
2810029C07Rik	2.27939	-0.114223	0.00195245	0.0148109	aphi_vs_ctrl
2810030D12Rik	0.587684	-3.45319	0.481568	0.613627	aphi_vs_ctrl
2810032G03Rik	0.43787	-4.45202	0.489454	0.61979	aphi_vs_ctrl
2810039B14Rik	0.278495	-0.00677849	0.447787	0.586175	aphi_vs_ctrl
2810047C21Rik1	-0.333247	-6.10601	0.113148	0.204832	aphi_vs_ctrl
2810049E08Rik	0.48714	-3.40742	0.492867	0.622999	aphi_vs_ctrl
2810403A07Rik	-0.204181	6.17198	0.0583176	0.168057	aphi_vs_ctrl
2810403D21Rik	1.34172	-0.629602	0.000382722	0.00526738	aphi_vs_ctrl
2810404M03Rik	-0.333247	-6.10601	0.113148	0.204832	aphi_vs_ctrl
2810405F15Rik	1.65579	-4.84973	0.251802	0.383148	aphi_vs_ctrl
2810407A14Rik	-0.253515	5.54272	0.267456	0.401445	aphi_vs_ctrl
2810408A11Rik	-0.364843	1.92227	0.136311	0.236579	aphi_vs_ctrl
2810408B13Rik	0.09501	3.82174	0.508214	0.63721	aphi_vs_ctrl
2810408I11Rik	0.27864	2.50734	0.104023	0.204832	aphi_vs_ctrl
2810410L24Rik	-0.279673	0.0949053	0.359527	0.504365	aphi_vs_ctrl
2810417H13Rik	0.494572	5.33556	0.0371015	0.119229	aphi_vs_ctrl
2810428I15Rik	-0.755556	4.56538	0.000564814	0.00670455	aphi_vs_ctrl
2810429I04Rik	-0.403449	-1.08964	0.279937	0.415489	aphi_vs_ctrl
2810433D01Rik	0.409898	0.693977	0.131787	0.230226	aphi_vs_ctrl
2810442N19Rik	-0.333247	-6.10601	0.113148	0.204832	aphi_vs_ctrl
2810454H06Rik	0.598577	-0.679368	0.420414	0.565243	aphi_vs_ctrl
2810459M11Rik	2.39363	-0.0954379	0.00256413	0.0177333	aphi_vs_ctrl
2810468N07Rik	-0.761533	-2.77065	0.0987402	0.204832	aphi_vs_ctrl
2810471M01Rik	-0.543717	-5.3433	0.487667	0.618219	aphi_vs_ctrl
2810474O19Rik	-0.173115	8.04682	0.0607541	0.173366	aphi_vs_ctrl
2900005J15Rik	0.175401	-1.25946	0.45849	0.596558	aphi_vs_ctrl
2900009J06Rik	1.16616	-2.76891	0.13127	0.229778	aphi_vs_ctrl
2900011O08Rik	-0.292394	4.82043	0.0819571	0.204832	aphi_vs_ctrl
2900026A02Rik	0.185315	5.27248	0.0164177	0.0655927	aphi_vs_ctrl
2900040C04Rik	-1.22673	-3.45241	0.0161743	0.0649469	aphi_vs_ctrl
2900041M22Rik	0.503778	0.89802	0.161278	0.269809	aphi_vs_ctrl
2900052N01Rik	4.2348	-0.589865	0.00014204	0.00298738	aphi_vs_ctrl
2900055J20Rik	2.03859	-4.81019	0.0540831	0.15896	aphi_vs_ctrl
2900057B20Rik	0.219526	-2.9688	0.772024	0.837458	aphi_vs_ctrl
2900060B14Rik	-1.00806	3.37622	0.0243243	0.0873322	aphi_vs_ctrl
2900060L22Rik	1.29951	-2.7075	0.198769	0.317955	aphi_vs_ctrl
2900076A07Rik	0.191142	1.46533	0.171145	0.2829	aphi_vs_ctrl
2900079G21Rik	-0.333757	-5.92927	0.481907	0.613627	aphi_vs_ctrl
2900089D17Rik	-0.663821	-2.8342	0.360642	0.505466	aphi_vs_ctrl
2900092C05Rik	0.437114	-5.84912	0.462647	0.599488	aphi_vs_ctrl
2900092D14Rik	1.75131	-3.11766	0.0490562	0.14738	aphi_vs_ctrl
2900097C17Rik	-0.555112	7.21052	0.00121535	0.0108542	aphi_vs_ctrl
3000002C10Rik	-0.799399	0.0204539	0.00165268	0.0132808	aphi_vs_ctrl
3010001F23Rik	1.44918	-3.2898	0.0914398	0.204832	aphi_vs_ctrl
3010003L21Rik	-0.806098	1.41306	0.0062497	0.0327602	aphi_vs_ctrl
3010026O09Rik	0.830586	-0.490876	0.154948	0.261518	aphi_vs_ctrl
3100003L05Rik	-0.0849548	-5.10332	0.941565	0.958985	aphi_vs_ctrl
3110002H16Rik	0.0489737	4.50868	0.787427	0.84937	aphi_vs_ctrl
3110004A20Rik	0.717236	-5.49535	0.301644	0.44045	aphi_vs_ctrl
3110009E18Rik	-0.634669	1.25718	0.00957494	0.044485	aphi_vs_ctrl
3110009F21Rik	-1.39375	-5.13976	0.213046	0.335578	aphi_vs_ctrl
3110009M11Rik	0.43953	-5.28785	0.646997	0.748116	aphi_vs_ctrl
3110015C05Rik	1.34787	-2.57933	0.220068	0.344379	aphi_vs_ctrl
3110021A11Rik	-0.405827	-2.63475	0.435704	0.578736	aphi_vs_ctrl
3110035E14Rik	0.719089	-3.28293	0.398094	0.54386	aphi_vs_ctrl
3110039I08Rik	0.63745	-2.65624	0.235895	0.364199	aphi_vs_ctrl
3110039M20Rik	-0.333247	-6.10601	0.113148	0.204832	aphi_vs_ctrl
3110040M04Rik	1.12389	0.584945	0.00414472	0.0244074	aphi_vs_ctrl
3110040N11Rik	0.0294713	3.84825	0.836798	0.88482	aphi_vs_ctrl
3110043O21Rik	0.104911	4.42038	0.424886	0.569786	aphi_vs_ctrl
3110045C21Rik	1.1079	-3.04121	0.0768385	0.204832	aphi_vs_ctrl
3110052M02Rik	0.501995	1.75703	0.17282	0.285092	aphi_vs_ctrl
3110053B16Rik	0.18918	0.187702	0.676741	0.766249	aphi_vs_ctrl
3110056K07Rik	0.0567916	0.709052	0.798564	0.85792	aphi_vs_ctrl
3110062M04Rik	0.421496	2.21684	0.0569985	0.165208	aphi_vs_ctrl
3110067G11Rik	0.923887	-2.28195	0.0925284	0.204832	aphi_vs_ctrl
3110070M22Rik	1.29593	-3.49986	0.0195846	0.0744539	aphi_vs_ctrl
3110079O15Rik	1.25127	-4.29553	0.0227545	0.083368	aphi_vs_ctrl
3110082I17Rik	-0.715453	3.98378	0.000803302	0.00832684	aphi_vs_ctrl
3110082J24Rik	-0.309382	-4.55113	0.635089	0.74418	aphi_vs_ctrl
3110083C13Rik	0.753343	-2.00845	0.034683	0.11333	aphi_vs_ctrl
3110099E03Rik	0.464815	-4.57206	0.61997	0.732651	aphi_vs_ctrl
3200001D21Rik	0.17774	-0.803145	0.75361	0.82497	aphi_vs_ctrl
3300002A11Rik	0.356016	-2.51644	0.583812	0.70316	aphi_vs_ctrl
3300002I08Rik	0.182811	2.41459	0.115507	0.207911	aphi_vs_ctrl
3300002P13Rik	1.95834	-1.86154	0.0139727	0.0586696	aphi_vs_ctrl
3300005D01Rik	1.43125	-4.62855	0.245791	0.376159	aphi_vs_ctrl
3425401B19Rik	-0.248494	-2.29257	0.707524	0.79017	aphi_vs_ctrl
3632451O06Rik	-0.174668	2.87063	0.357512	0.502071	aphi_vs_ctrl
3632454L22Rik	0.847028	-0.905364	0.0401391	0.126733	aphi_vs_ctrl
3830403N18Rik	2.97328	-3.78609	0.00600214	0.0318176	aphi_vs_ctrl
3830406C13Rik	-0.230728	3.3146	0.127236	0.224409	aphi_vs_ctrl
3830408C21Rik	0.309464	-0.3021	0.278265	0.413567	aphi_vs_ctrl
3830417A13Rik	2.14398	-0.224981	9.35265e-05	0.00241266	aphi_vs_ctrl
3830432H09Rik	1.06968	-0.0903325	0.00729084	0.0366661	aphi_vs_ctrl
3930402G23Rik	1.50025	-0.369499	0.0179025	0.0698282	aphi_vs_ctrl
4430402I18Rik	0.845061	-0.718103	0.0901537	0.204832	aphi_vs_ctrl
4631405J19Rik	0.930675	-2.94619	0.269886	0.404099	aphi_vs_ctrl
4631405K08Rik	0.994352	-0.457041	0.0277129	0.0962219	aphi_vs_ctrl
4632404H12Rik	-0.52882	1.46884	0.0570864	0.165406	aphi_vs_ctrl
4632415L05Rik	-0.30954	3.30288	0.00322112	0.0205294	aphi_vs_ctrl
4632427E13Rik	-0.246952	0.909716	0.351776	0.495883	aphi_vs_ctrl
4632428C04Rik	-0.411	-0.566307	0.375981	0.520992	aphi_vs_ctrl
4732414G09Rik	0.0928941	-1.60218	0.886722	0.920864	aphi_vs_ctrl
4732416N19Rik	-0.379694	-1.35565	0.138793	0.239892	aphi_vs_ctrl
4732419C18Rik	0.210118	3.11933	0.362263	0.506991	aphi_vs_ctrl
4732440D04Rik	-0.357923	0.806963	0.0826635	0.204832	aphi_vs_ctrl
4732465J04Rik	1.13882	-4.52026	0.119334	0.21325	aphi_vs_ctrl
4732471J01Rik	0.00909305	1.13308	0.956121	0.969334	aphi_vs_ctrl
4732490B19Rik	2.02367	-3.10644	0.0219237	0.080972	aphi_vs_ctrl
4732491K20Rik	0.392764	-0.163716	0.217595	0.341273	aphi_vs_ctrl
4831407H17Rik	-0.329846	-5.31986	0.70949	0.791485	aphi_vs_ctrl
4831440D22Rik	-0.53898	-1.39409	0.144551	0.247632	aphi_vs_ctrl
4831440E17Rik	-0.0464596	0.680009	0.586812	0.705762	aphi_vs_ctrl
4833411C07Rik	-0.333152	-5.61764	0.581538	0.701492	aphi_vs_ctrl
4833412C05Rik	-0.863705	-5.31831	0.142172	0.244484	aphi_vs_ctrl
4833415N18Rik	0.549515	-1.84796	0.160061	0.268294	aphi_vs_ctrl
4833417C18Rik	-0.260279	0.194312	0.240077	0.369299	aphi_vs_ctrl
4833418N02Rik	2.05349	-1.54182	0.0163674	0.0654642	aphi_vs_ctrl
4833419F23Rik	1.30479	-1.50358	0.0343525	0.112484	aphi_vs_ctrl
4833420G17Rik	-0.0267431	4.48614	0.680024	0.768666	aphi_vs_ctrl
4833422C13Rik	2.62417	-4.59628	0.000470073	0.00600665	aphi_vs_ctrl
4833422M21Rik	-1.18415	-3.15866	0.00492403	0.0276849	aphi_vs_ctrl
4833423E24Rik	1.87985	-5.36993	0.0100194	0.0459502	aphi_vs_ctrl
4833427F10Rik	-0.0483172	-1.3039	0.841467	0.888017	aphi_vs_ctrl
4833427G06Rik	1.97408	-2.66873	0.101129	0.204832	aphi_vs_ctrl
4833428L15Rik	2.75589	-2.8429	0.0191245	0.0731721	aphi_vs_ctrl
4833438C02Rik	1.34834	-0.313774	0.0162233	0.0650821	aphi_vs_ctrl
4833439L19Rik	-0.350746	6.22057	0.0159515	0.0644422	aphi_vs_ctrl
4833447I15Rik	-0.512897	0.0132422	0.129056	0.226836	aphi_vs_ctrl
4921501E09Rik	-0.333585	-5.75278	0.462201	0.599488	aphi_vs_ctrl
4921504A21Rik	0.702897	-2.19391	0.375628	0.520719	aphi_vs_ctrl
4921504E06Rik	0.71966	-5.40089	0.290788	0.427907	aphi_vs_ctrl
4921507G05Rik	0.0582255	-3.11262	0.932472	0.952701	aphi_vs_ctrl
4921507P07Rik	1.79374	-1.50428	0.023584	0.0854549	aphi_vs_ctrl
4921508D12Rik	0.190565	-5.93082	0.646491	0.74773	aphi_vs_ctrl
4921509C19Rik	1.25909	-4.1039	0.064082	0.180288	aphi_vs_ctrl
4921509O07Rik	1.15736	-4.18951	0.0214575	0.079796	aphi_vs_ctrl
4921511C10Rik	0.118909	-2.10293	0.752866	0.824514	aphi_vs_ctrl
4921511C20Rik	-0.333008	-5.49523	0.656759	0.755785	aphi_vs_ctrl
4921511H03Rik	0.728082	-5.754	0.389779	0.535525	aphi_vs_ctrl
4921511I17Rik	1.07686	-2.95315	0.325564	0.467257	aphi_vs_ctrl
4921511M17Rik	-0.33263	-5.89648	0.505791	0.635052	aphi_vs_ctrl
4921513H07Rik	1.26905	-1.98387	0.0310389	0.104675	aphi_vs_ctrl
4921513I03Rik	0.513617	-2.0901	0.170248	0.281572	aphi_vs_ctrl
4921515E04Rik	-0.123318	-0.257973	0.727092	0.804521	aphi_vs_ctrl
4921517D16Rik	-1.27085	-0.473274	0.0284074	0.0980127	aphi_vs_ctrl
4921517D22Rik	1.85738	-3.49228	0.0752118	0.201715	aphi_vs_ctrl
4921518K17Rik	-0.174213	-0.661487	0.488429	0.618795	aphi_vs_ctrl
4921524J17Rik	-0.0923811	3.50347	0.320613	0.461708	aphi_vs_ctrl
4921524L21Rik	0.72048	-2.34233	0.143188	0.245776	aphi_vs_ctrl
4921525O09Rik	-0.261557	2.19027	0.0325001	0.10804	aphi_vs_ctrl
4921528I07Rik	-0.0934014	-3.76583	0.904464	0.933846	aphi_vs_ctrl
4921529L05Rik	-0.0672777	-2.2974	0.897216	0.928616	aphi_vs_ctrl
4921530L21Rik	-0.333247	-6.10601	0.113148	0.204832	aphi_vs_ctrl
4921531C22Rik	0.279839	0.419525	0.261589	0.394604	aphi_vs_ctrl
4921531P14Rik	-0.333218	-5.92952	0.429973	0.573062	aphi_vs_ctrl
4921533I20Rik	1.25802	-5.57818	0.113234	0.204892	aphi_vs_ctrl
4921534H16Rik	-0.333726	-5.61701	0.613117	0.727052	aphi_vs_ctrl
4921536K21Rik	-0.324569	-0.779259	0.579418	0.699802	aphi_vs_ctrl
4921539E11Rik	-0.735663	-3.83941	0.512438	0.640885	aphi_vs_ctrl
4922502D21Rik	-0.332654	-5.93004	0.443148	0.581472	aphi_vs_ctrl
4922502H24Rik	-0.333247	-6.10601	0.113148	0.204832	aphi_vs_ctrl
4922502N22Rik	-0.332654	-5.93004	0.443148	0.581472	aphi_vs_ctrl
4930401C15Rik	0.191327	-5.67319	0.709652	0.791557	aphi_vs_ctrl
4930401G09Rik	1.9	-1.20837	2.82539e-05	0.00143028	aphi_vs_ctrl
4930401O10Rik	-0.333247	-6.10601	0.113148	0.204832	aphi_vs_ctrl
4930401O12Rik	-0.333247	-6.10601	0.113148	0.204832	aphi_vs_ctrl
4930402D18Rik	-0.333247	-6.10601	0.113148	0.204832	aphi_vs_ctrl
4930402F06Rik	-0.333247	-6.10601	0.113148	0.204832	aphi_vs_ctrl
4930402F11Rik	-0.333247	-6.10601	0.113148	0.204832	aphi_vs_ctrl
4930402H24Rik	0.260859	4.35689	0.00661747	0.0341388	aphi_vs_ctrl
4930402K13Rik	0.981608	-5.67319	0.330787	0.473269	aphi_vs_ctrl
4930403D09Rik	-0.341694	-4.5204	0.736143	0.811928	aphi_vs_ctrl
4930404A05Rik	-0.333247	-6.10601	0.113148	0.204832	aphi_vs_ctrl
4930404H11Rik	0.193253	-5.5776	0.69824	0.783017	aphi_vs_ctrl
4930404H24Rik	0.710014	-2.78537	0.275857	0.410714	aphi_vs_ctrl
4930404I05Rik	-0.0217068	-1.09332	0.957529	0.970353	aphi_vs_ctrl
4930404I20Rik	-0.855763	-5.32161	0.296092	0.434174	aphi_vs_ctrl
4930404K13Rik	-0.333247	-6.10601	0.113148	0.204832	aphi_vs_ctrl
4930404N11Rik	-1.06791	-5.86074	0.109695	0.204832	aphi_vs_ctrl
4930405A10Rik	0.441542	-5.84732	0.479857	0.613627	aphi_vs_ctrl
4930405A21Rik	0.215244	-1.08017	0.416915	0.56237	aphi_vs_ctrl
4930405D01Rik	-0.333247	-6.10601	0.113148	0.204832	aphi_vs_ctrl
4930405D11Rik	-0.333247	-6.10601	0.113148	0.204832	aphi_vs_ctrl
4930405J17Rik	0.680016	-3.77073	0.453436	0.591792	aphi_vs_ctrl
4930405L22Rik	1.38522	-5.18339	0.0544666	0.15976	aphi_vs_ctrl
4930405O22Rik	-0.0562179	-3.53922	0.882127	0.917435	aphi_vs_ctrl
4930406D18Rik	-0.333247	-6.10601	0.113148	0.204832	aphi_vs_ctrl
4930407G08Rik	-0.860247	-5.75422	0.196644	0.31549	aphi_vs_ctrl
4930407I02Rik	-0.343424	-3.88214	0.504983	0.634391	aphi_vs_ctrl
4930407I10Rik	1.54711	-5.3064	0.153246	0.259201	aphi_vs_ctrl
4930407I19Rik	-0.333247	-6.10601	0.113148	0.204832	aphi_vs_ctrl
4930412B13Rik	-0.333247	-6.10601	0.113148	0.204832	aphi_vs_ctrl
4930412C18Rik	0.460476	-3.11933	0.541358	0.667405	aphi_vs_ctrl
4930412E21Rik	0.441544	-5.84732	0.479857	0.613627	aphi_vs_ctrl
4930412F12Rik	-0.0281395	-3.47034	0.974281	0.982225	aphi_vs_ctrl
4930412L05Rik	0.622099	-0.891233	0.100489	0.204832	aphi_vs_ctrl
4930412O13Rik	0.539156	-1.85833	0.338324	0.481833	aphi_vs_ctrl
4930413E15Rik	-0.223157	-4.49017	0.854894	0.897943	aphi_vs_ctrl
4930413F20Rik	-0.173992	-1.32866	0.65372	0.753439	aphi_vs_ctrl
4930413G21Rik	-0.593228	0.996009	0.147929	0.252319	aphi_vs_ctrl
4930413M19Rik	-0.333247	-6.10601	0.113148	0.204832	aphi_vs_ctrl
4930414F18Rik	0.969917	-4.553	0.117497	0.210633	aphi_vs_ctrl
4930414N06Rik	0.656512	-2.54831	0.52516	0.652397	aphi_vs_ctrl
4930415F15Rik	0.199877	-1.15401	0.565598	0.688977	aphi_vs_ctrl
4930415L06Rik	-0.333247	-6.10601	0.113148	0.204832	aphi_vs_ctrl
4930415O20Rik	0.641593	-3.19093	0.343835	0.487502	aphi_vs_ctrl
4930417H01Rik	0.438985	-5.58949	0.63763	0.745899	aphi_vs_ctrl
4930417O13Rik	1.13072	-5.30642	0.148457	0.252899	aphi_vs_ctrl
4930417O22Rik	0.431799	-4.26282	0.476207	0.612145	aphi_vs_ctrl
4930419G24Rik	-0.332654	-5.93004	0.443148	0.581472	aphi_vs_ctrl
4930421P07Rik	0.193215	-5.31991	0.596586	0.71358	aphi_vs_ctrl
4930423D24Rik	-0.333247	-6.10601	0.113148	0.204832	aphi_vs_ctrl
4930423M02Rik	-0.333247	-6.10601	0.113148	0.204832	aphi_vs_ctrl
4930425K10Rik	-0.333247	-6.10601	0.113148	0.204832	aphi_vs_ctrl
4930425L21Rik	0.125605	0.101198	0.55248	0.67724	aphi_vs_ctrl
4930425O10Rik	1.20975	-4.71707	0.144533	0.247614	aphi_vs_ctrl
4930426D05Rik	-0.333247	-6.10601	0.113148	0.204832	aphi_vs_ctrl
4930426I24Rik	1.05456	-2.65168	0.0407746	0.128247	aphi_vs_ctrl
4930426L09Rik	-0.884999	-4.28702	0.375881	0.520949	aphi_vs_ctrl
4930427A07Rik	0.00733642	4.68341	0.869508	0.90836	aphi_vs_ctrl
4930428D20Rik	-0.333247	-6.10601	0.113148	0.204832	aphi_vs_ctrl
4930428E07Rik	-0.332654	-5.93004	0.443148	0.581472	aphi_vs_ctrl
4930428G15Rik	0.875888	-4.65054	0.347971	0.491996	aphi_vs_ctrl
4930428N03Rik	1.37149	-5.18529	0.177356	0.291184	aphi_vs_ctrl
4930428O21Rik	-0.333218	-5.92952	0.429973	0.573062	aphi_vs_ctrl
4930429B21Rik	-0.152385	1.77692	0.222889	0.34795	aphi_vs_ctrl
4930429D17Rik	1.75837	-3.66875	0.0644612	0.181143	aphi_vs_ctrl
4930429F11Rik	-0.333219	-5.84756	0.570041	0.69234	aphi_vs_ctrl
4930429F24Rik	0.995149	-1.69233	0.154452	0.26082	aphi_vs_ctrl
4930429P21Rik	-0.375595	-3.91826	0.7825	0.845625	aphi_vs_ctrl
4930430A15Rik	-0.333247	-6.10601	0.113148	0.204832	aphi_vs_ctrl
4930430E12Rik	-0.333247	-6.10601	0.113148	0.204832	aphi_vs_ctrl
4930430F08Rik	-0.362311	3.52041	0.0289136	0.099333	aphi_vs_ctrl
4930430F21Rik	-0.333247	-6.10601	0.113148	0.204832	aphi_vs_ctrl
4930430J02Rik	0.6753	-5.15703	0.546587	0.671884	aphi_vs_ctrl
4930431F10Rik	0.0772665	0.984034	0.802772	0.860858	aphi_vs_ctrl
4930431F12Rik	-0.52041	1.41445	0.0192184	0.0733934	aphi_vs_ctrl
4930431P03Rik	0.190775	-5.40262	0.666137	0.757609	aphi_vs_ctrl
4930431P22Rik	1.26622	-2.34805	0.029404	0.100587	aphi_vs_ctrl
4930432E11Rik	1.08132	-4.10621	0.293734	0.431347	aphi_vs_ctrl
4930432J09Rik	-0.268063	0.556751	0.433929	0.577035	aphi_vs_ctrl
4930432K21Rik	0.286386	2.9326	0.137529	0.23822	aphi_vs_ctrl
4930432L08Rik	1.31592	-5.19549	0.164272	0.273691	aphi_vs_ctrl
4930432M17Rik	-0.333247	-6.10601	0.113148	0.204832	aphi_vs_ctrl
4930432O09Rik	1.3384	-4.41029	0.181561	0.296527	aphi_vs_ctrl
4930433B08Rik	-0.333218	-5.92952	0.429973	0.573062	aphi_vs_ctrl
4930433I11Rik	-1.5271	-3.55527	0.352665	0.496818	aphi_vs_ctrl
4930433N12Rik	0.71853	-0.152611	0.0261872	0.0922534	aphi_vs_ctrl
4930434B07Rik	0.871424	-4.7089	0.503397	0.632859	aphi_vs_ctrl
4930434J06Rik	-0.333247	-6.10601	0.113148	0.204832	aphi_vs_ctrl
4930435E12Rik	-0.858531	-5.2259	0.0960272	0.204832	aphi_vs_ctrl
4930435F18Rik	-0.491727	4.88907	0.0593419	0.170169	aphi_vs_ctrl
4930437M23Rik	-0.333247	-6.10601	0.113148	0.204832	aphi_vs_ctrl
4930438A08Rik	2.64954	-3.1283	0.000832033	0.00851791	aphi_vs_ctrl
4930438E09Rik	0.442387	-5.49609	0.493963	0.624102	aphi_vs_ctrl
4930439A04Rik	-0.496022	-0.14338	0.237589	0.366214	aphi_vs_ctrl
4930439D14Rik	0.0777427	-4.1797	0.91907	0.943848	aphi_vs_ctrl
4930440C22Rik	-0.333247	-6.10601	0.113148	0.204832	aphi_vs_ctrl
4930440I19Rik	-0.576565	-5.36157	0.562019	0.685728	aphi_vs_ctrl
4930441H08Rik	-1.67506	-4.87422	0.0200338	0.0757347	aphi_vs_ctrl
4930441J16Rik	-0.333247	-6.10601	0.113148	0.204832	aphi_vs_ctrl
4930442E04Rik	-0.333247	-6.10601	0.113148	0.204832	aphi_vs_ctrl
4930442J19Rik	-0.810253	-5.86538	0.136264	0.236525	aphi_vs_ctrl
4930442L01Rik	-0.3342	-5.57827	0.689701	0.776184	aphi_vs_ctrl
4930443O20Rik	-0.647223	-3.35442	0.279122	0.414501	aphi_vs_ctrl
4930444A19Rik	-0.13522	-3.64688	0.881933	0.917286	aphi_vs_ctrl
4930444F02Rik	6.35559	-1.75655	7.58419e-05	0.00221825	aphi_vs_ctrl
4930444G20Rik	-0.253188	-1.03119	0.543483	0.669228	aphi_vs_ctrl
4930444M15Rik	-0.0698189	3.16039	0.437665	0.580658	aphi_vs_ctrl
4930444P10Rik	0.11436	-3.07325	0.761536	0.830827	aphi_vs_ctrl
4930445E18Rik	1.8432	-1.89757	0.00239201	0.0168893	aphi_vs_ctrl
4930445N18Rik	1.17498	-3.49718	0.05699	0.165208	aphi_vs_ctrl
4930447A16Rik	0.195458	-5.75408	0.762279	0.831174	aphi_vs_ctrl
4930447C04Rik	1.05126	2.75213	0.00810792	0.0395489	aphi_vs_ctrl
4930447F24Rik	2.30491	-1.04724	0.000496996	0.00621143	aphi_vs_ctrl
4930447J18Rik	0.191287	-5.75484	0.638172	0.746267	aphi_vs_ctrl
4930447K03Rik	0.696181	-2.06668	0.395789	0.541457	aphi_vs_ctrl
4930447M23Rik	1.73309	-4.5428	0.128777	0.226467	aphi_vs_ctrl
4930447N08Rik	1.13565	-5.61831	0.105118	0.204832	aphi_vs_ctrl
4930448C13Rik	-0.333247	-6.10601	0.113148	0.204832	aphi_vs_ctrl
4930448F12Rik	-0.333247	-6.10601	0.113148	0.204832	aphi_vs_ctrl
4930448H16Rik	-0.333247	-6.10601	0.113148	0.204832	aphi_vs_ctrl
4930448I06Rik	0.578804	-2.41048	0.323832	0.465268	aphi_vs_ctrl
4930448I18Rik	-0.333218	-5.92952	0.429973	0.573062	aphi_vs_ctrl
4930448K20Rik	0.388216	-5.16769	0.714764	0.795186	aphi_vs_ctrl
4930449C09Rik	-2.38858	-3.87392	0.0189563	0.0726996	aphi_vs_ctrl
4930449E01Rik	-0.333228	-5.75329	0.473901	0.610116	aphi_vs_ctrl
4930449E18Rik	-0.333247	-6.10601	0.113148	0.204832	aphi_vs_ctrl
4930449I24Rik	-0.333247	-6.10601	0.113148	0.204832	aphi_vs_ctrl
4930451E10Rik	0.148799	-3.05009	0.744835	0.818048	aphi_vs_ctrl
4930451G09Rik	0.226111	-0.195398	0.675659	0.765383	aphi_vs_ctrl
4930451I11Rik	0.709976	-5.57798	0.196053	0.314779	aphi_vs_ctrl
4930452A19Rik	-0.333247	-6.10601	0.113148	0.204832	aphi_vs_ctrl
4930452B06Rik	-0.403602	3.77159	0.0142445	0.0594722	aphi_vs_ctrl
4930452G13Rik	0.192641	-5.93006	0.666107	0.757602	aphi_vs_ctrl
4930452N14Rik	-0.327611	-3.82152	0.365432	0.510164	aphi_vs_ctrl
4930453H23Rik	-0.201435	-2.03975	0.747564	0.820297	aphi_vs_ctrl
4930453L07Rik	-0.212072	-2.34772	0.775508	0.840228	aphi_vs_ctrl
4930453N24Rik	-0.303297	6.12142	0.00616333	0.0324203	aphi_vs_ctrl
4930455B14Rik	1.37645	-1.44752	0.0388813	0.123688	aphi_vs_ctrl
4930455C13Rik	-0.327313	-0.819058	0.253931	0.385729	aphi_vs_ctrl
4930455D15Rik	1.21494	-5.15659	0.222609	0.347588	aphi_vs_ctrl
4930455F16Rik	-0.333247	-6.10601	0.113148	0.204832	aphi_vs_ctrl
4930455G09Rik	0.682747	-0.883898	0.112088	0.204832	aphi_vs_ctrl
4930455H04Rik	1.13279	-5.61928	0.106902	0.204832	aphi_vs_ctrl
4930455J16Rik	0.192641	-5.93006	0.666107	0.757602	aphi_vs_ctrl
4930456L15Rik	-1.17104	-5.82689	0.0949412	0.204832	aphi_vs_ctrl
4930458A03Rik	-0.333247	-6.10601	0.113148	0.204832	aphi_vs_ctrl
4930459C07Rik	0.719953	-5.18371	0.263958	0.397382	aphi_vs_ctrl
4930459I23Rik	-0.431385	-1.91575	0.251269	0.382627	aphi_vs_ctrl
4930459L07Rik	0.190565	-5.93082	0.646492	0.74773	aphi_vs_ctrl
4930461C15Rik	0.955626	-5.06078	0.185308	0.3013	aphi_vs_ctrl
4930461G14Rik	-0.623437	3.47837	0.00859319	0.0412594	aphi_vs_ctrl
4930463O16Rik	-0.00235252	-2.60556	0.994219	0.996147	aphi_vs_ctrl
4930465K10Rik	-0.337565	-0.629489	0.377537	0.522565	aphi_vs_ctrl
4930465M20Rik	0.720207	-5.26643	0.360937	0.505747	aphi_vs_ctrl
4930467D21Rik	0.807812	-3.54266	0.271925	0.406214	aphi_vs_ctrl
4930467E23Rik	-0.0414741	2.42439	0.532758	0.659253	aphi_vs_ctrl
4930467J12Rik	-0.323179	-5.75334	0.486646	0.617488	aphi_vs_ctrl
4930467K11Rik	0.441842	-5.32111	0.620362	0.732976	aphi_vs_ctrl
4930469G21Rik	0.223415	-1.75213	0.505327	0.63469	aphi_vs_ctrl
4930469K13Rik	-0.332736	-5.75397	0.677016	0.766294	aphi_vs_ctrl
4930470H14Rik	-0.881072	10.8064	0.00018958	0.00348575	aphi_vs_ctrl
4930470O06Rik	-0.333247	-6.10601	0.113148	0.204832	aphi_vs_ctrl
4930470P17Rik	1.79524	-3.02196	0.0433013	0.133885	aphi_vs_ctrl
4930471C04Rik	0.973426	-5.67126	0.123743	0.219405	aphi_vs_ctrl
4930471G03Rik	-0.0562836	-5.32228	0.914613	0.941092	aphi_vs_ctrl
4930471G24Rik	1.2567	-5.57881	0.117173	0.210136	aphi_vs_ctrl
4930471L23Rik	0.389425	-1.33897	0.404089	0.549785	aphi_vs_ctrl
4930471M09Rik	0.172764	-2.73025	0.837739	0.885271	aphi_vs_ctrl
4930473A02Rik	0.374901	-2.45103	0.619189	0.732116	aphi_vs_ctrl
4930473H19Rik	1.0361	-0.093707	0.0305831	0.103593	aphi_vs_ctrl
4930473O22Rik	-0.332633	-5.79425	0.640494	0.747429	aphi_vs_ctrl
4930474G06Rik	0.656556	-0.0780377	0.0318779	0.106571	aphi_vs_ctrl
4930474H20Rik	1.28757	-4.66871	0.0238541	0.0861744	aphi_vs_ctrl
4930474M22Rik	-0.333247	-6.10601	0.113148	0.204832	aphi_vs_ctrl
4930474N05Rik	-0.333247	-6.10601	0.113148	0.204832	aphi_vs_ctrl
4930474N09Rik	-1.38485	-5.08601	0.204694	0.325061	aphi_vs_ctrl
4930477N07Rik	1.26593	-1.55417	0.0215431	0.0800477	aphi_vs_ctrl
4930478L05Rik	0.156157	-1.15806	0.699668	0.784215	aphi_vs_ctrl
4930478P22Rik	-0.33227	-5.59167	0.726816	0.804388	aphi_vs_ctrl
4930479D17Rik	-1.24968	-3.68864	0.100065	0.204832	aphi_vs_ctrl
4930479H17Rik	2.05217	-1.18078	0.00216418	0.015796	aphi_vs_ctrl
4930480E11Rik	-0.333247	-6.10601	0.113148	0.204832	aphi_vs_ctrl
4930480G23Rik	1.47937	-2.01482	0.0664281	0.18516	aphi_vs_ctrl
4930480K15Rik	0.153301	-4.33692	0.845238	0.890776	aphi_vs_ctrl
4930480K23Rik	-0.553991	2.54868	0.0124151	0.0537903	aphi_vs_ctrl
4930480M12Rik	1.40079	-4.40597	0.18734	0.303839	aphi_vs_ctrl
4930481A15Rik	0.405246	-1.25255	0.514559	0.642847	aphi_vs_ctrl
4930482G09Rik	1.49221	-3.64381	0.0708566	0.192954	aphi_vs_ctrl
4930483J18Rik	0.798942	-3.63202	0.276635	0.41155	aphi_vs_ctrl
4930483K19Rik	-0.963889	-1.83279	0.0233459	0.0848355	aphi_vs_ctrl
4930483O08Rik	0.371973	-3.36164	0.754604	0.825743	aphi_vs_ctrl
4930484H19Rik	0.194252	-5.92932	0.661531	0.756942	aphi_vs_ctrl
4930486F22Rik	-0.333247	-6.10601	0.113148	0.204832	aphi_vs_ctrl
4930486I03Rik	1.33004	-4.1411	0.0938818	0.204832	aphi_vs_ctrl
4930486L24Rik	-0.190201	0.549572	0.634086	0.74337	aphi_vs_ctrl
4930487D11Rik	-0.333757	-5.92927	0.481908	0.613627	aphi_vs_ctrl
4930487H11Rik	0.821235	-2.45862	0.00837044	0.0404422	aphi_vs_ctrl
4930488B22Rik	-2.50139	-4.24613	0.0358947	0.116427	aphi_vs_ctrl
4930488L21Rik	0.191246	-5.57848	0.793344	0.854052	aphi_vs_ctrl
4930488N24Rik	-1.31599	-1.8962	0.00218185	0.015872	aphi_vs_ctrl
4930500A05Rik	0.130992	-0.181645	0.729495	0.806539	aphi_vs_ctrl
4930500F04Rik	-0.333247	-6.10601	0.113148	0.204832	aphi_vs_ctrl
4930500G05Rik	2.16049	-1.202	0.00145793	0.0122024	aphi_vs_ctrl
4930500H12Rik	0.384704	-1.98384	0.487321	0.617998	aphi_vs_ctrl
4930500L23Rik	0.194354	-5.75335	0.76335	0.831664	aphi_vs_ctrl
4930502A04Rik	-0.333247	-6.10601	0.113148	0.204832	aphi_vs_ctrl
4930502C15Rik	-0.440248	-0.95351	0.0973194	0.204832	aphi_vs_ctrl
4930502E09Rik	0.405291	-1.58936	0.167323	0.277725	aphi_vs_ctrl
4930502E18Rik	0.443264	2.28926	0.147408	0.251559	aphi_vs_ctrl
4930503B20Rik	1.61138	-2.2487	0.0944482	0.204832	aphi_vs_ctrl
4930503E14Rik	0.239727	-3.91592	0.7174	0.797188	aphi_vs_ctrl
4930503E24Rik	-0.333247	-6.10601	0.113148	0.204832	aphi_vs_ctrl
4930503F20Rik	-0.858621	-5.93019	0.0671804	0.18541	aphi_vs_ctrl
4930503H13Rik	-0.333247	-6.10601	0.113148	0.204832	aphi_vs_ctrl
4930503L19Rik	-0.105702	4.82697	0.268184	0.402287	aphi_vs_ctrl
4930503O07Rik	-0.333247	-6.10601	0.113148	0.204832	aphi_vs_ctrl
4930504C09Rik	0.561534	-2.24018	0.47827	0.613627	aphi_vs_ctrl
4930504O13Rik	1.42883	-4.45394	0.0858064	0.204832	aphi_vs_ctrl
4930505A04Rik	1.00525	-3.4677	0.00875405	0.0417987	aphi_vs_ctrl
4930505G20Rik	-0.333247	-6.10601	0.113148	0.204832	aphi_vs_ctrl
4930505K13Rik	-0.333247	-6.10601	0.113148	0.204832	aphi_vs_ctrl
4930505K14Rik	0.193568	-5.75408	0.764468	0.832256	aphi_vs_ctrl
4930505N22Rik	-0.618483	-4.44501	0.617452	0.730827	aphi_vs_ctrl
4930505O20Rik	-0.332654	-5.93004	0.443148	0.581472	aphi_vs_ctrl
4930506A18Rik	0.815916	-4.75287	0.281301	0.417017	aphi_vs_ctrl
4930506C21Rik	0.474836	-1.50246	0.457626	0.595737	aphi_vs_ctrl
4930507D05Rik	-0.707529	-0.490142	0.065139	0.182523	aphi_vs_ctrl
4930507D10Rik	0.605804	-5.22281	0.507671	0.636771	aphi_vs_ctrl
4930509E16Rik	0.597153	0.540104	0.129869	0.227922	aphi_vs_ctrl
4930509J09Rik	-0.0912102	-2.00301	0.763731	0.831755	aphi_vs_ctrl
4930509K18Rik	0.720899	-5.40166	0.27018	0.404418	aphi_vs_ctrl
4930511A02Rik	1.14206	-4.69031	0.378054	0.523101	aphi_vs_ctrl
4930511A08Rik	0.0406943	-3.20822	0.925298	0.948364	aphi_vs_ctrl
4930511E03Rik	0.190045	-5.40157	0.647357	0.748308	aphi_vs_ctrl
4930511M06Rik	0.430149	2.42993	0.0022773	0.0163072	aphi_vs_ctrl
4930512B01Rik	0.187662	-0.805379	0.710129	0.791912	aphi_vs_ctrl
4930512H18Rik	0.720084	-5.18251	0.264795	0.398376	aphi_vs_ctrl
4930512J16Rik	1.26361	-0.23594	0.0445554	0.136953	aphi_vs_ctrl
4930512M02Rik	0.0520919	-0.0972506	0.890885	0.923994	aphi_vs_ctrl
4930513D17Rik	-0.333247	-6.10601	0.113148	0.204832	aphi_vs_ctrl
4930513L16Rik	-0.648354	-3.37552	0.516824	0.645054	aphi_vs_ctrl
4930513N10Rik	0.104062	3.17442	0.425202	0.570041	aphi_vs_ctrl
4930513O06Rik	0.19505	-5.5781	0.707105	0.789848	aphi_vs_ctrl
4930515B02Rik	-0.333646	-5.75295	0.693124	0.778862	aphi_vs_ctrl
4930515G01Rik	0.546043	-0.746814	0.220825	0.345339	aphi_vs_ctrl
4930515G16Rik	-0.333247	-6.10601	0.113148	0.204832	aphi_vs_ctrl
4930515L03Rik	-0.333247	-6.10601	0.113148	0.204832	aphi_vs_ctrl
4930515L19Rik	2.18377	-4.57335	0.00419061	0.0246134	aphi_vs_ctrl
4930517E11Rik	-0.333247	-6.10601	0.113148	0.204832	aphi_vs_ctrl
4930517G24Rik	0.887644	-1.36363	0.107549	0.204832	aphi_vs_ctrl
4930517M08Rik	-0.333247	-6.10601	0.113148	0.204832	aphi_vs_ctrl
4930518J21Rik	-0.3269	-5.18531	0.75917	0.829234	aphi_vs_ctrl
4930518P08Rik	0.0802175	-4.50404	0.878024	0.914325	aphi_vs_ctrl
4930519D14Rik	-0.333247	-6.10601	0.113148	0.204832	aphi_vs_ctrl
4930519F09Rik	0.508277	-0.268521	0.183373	0.298933	aphi_vs_ctrl
4930519F16Rik	-0.232023	3.1582	0.124842	0.220987	aphi_vs_ctrl
4930519F24Rik	-0.333247	-6.10601	0.113148	0.204832	aphi_vs_ctrl
4930519G04Rik	0.807091	-2.01363	0.0619575	0.175926	aphi_vs_ctrl
4930519H02Rik	0.226628	-4.12722	0.775707	0.840394	aphi_vs_ctrl
4930519K11Rik	-0.747392	-5.26502	0.50575	0.635052	aphi_vs_ctrl
4930520O04Rik	-0.146884	-0.140651	0.629719	0.74002	aphi_vs_ctrl
4930520P13Rik	0.147475	-2.78065	0.861827	0.902996	aphi_vs_ctrl
4930521E06Rik	0.722112	-5.40329	0.154413	0.260809	aphi_vs_ctrl
4930521O11Rik	-0.00787992	2.59972	0.960832	0.972719	aphi_vs_ctrl
4930521O17Rik	-0.333247	-6.10601	0.113148	0.204832	aphi_vs_ctrl
4930522H14Rik	0.19264	-5.93006	0.666108	0.757602	aphi_vs_ctrl
4930522L14Rik	1.15176	5.77117	0.000155978	0.00314347	aphi_vs_ctrl
4930522O17Rik	-0.85553	-5.93112	0.102053	0.204832	aphi_vs_ctrl
4930522P08Rik	-0.287687	-0.248752	0.284828	0.42102	aphi_vs_ctrl
4930523C07Rik	2.67458	-3.92951	0.000381209	0.00525456	aphi_vs_ctrl
4930523O13Rik	-0.333247	-6.10601	0.113148	0.204832	aphi_vs_ctrl
4930524B15Rik	0.0210363	0.951902	0.909487	0.937399	aphi_vs_ctrl
4930524B17Rik	0.299509	-1.53462	0.266657	0.400627	aphi_vs_ctrl
4930524C18Rik	0.193559	-5.67223	0.806169	0.863184	aphi_vs_ctrl
4930524N10Rik	-0.333247	-6.10601	0.113148	0.204832	aphi_vs_ctrl
4930524O05Rik	-0.333771	-5.84725	0.60385	0.719054	aphi_vs_ctrl
4930524O08Rik	0.121193	-4.39798	0.93005	0.951139	aphi_vs_ctrl
4930525C09Rik	-0.58574	-4.67975	0.507539	0.636738	aphi_vs_ctrl
4930525D18Rik	-0.627953	-4.62955	0.481466	0.613627	aphi_vs_ctrl
4930525G20Rik	-0.05934	-0.253516	0.794281	0.854857	aphi_vs_ctrl
4930526F13Rik	-0.333247	-6.10601	0.113148	0.204832	aphi_vs_ctrl
4930526H09Rik	0.440007	-5.08411	0.625222	0.736554	aphi_vs_ctrl
4930526I15Rik	-0.537318	-0.557806	0.256279	0.388473	aphi_vs_ctrl
4930526L06Rik	-0.568684	2.18725	0.00118197	0.0106644	aphi_vs_ctrl
4930527F14Rik	-0.491392	-3.12774	0.215126	0.338197	aphi_vs_ctrl
4930527G23Rik	-0.333247	-6.10601	0.113148	0.204832	aphi_vs_ctrl
4930528A17Rik	0.426358	0.438034	0.350346	0.494389	aphi_vs_ctrl
4930528D03Rik	0.00414693	0.98454	0.972174	0.980825	aphi_vs_ctrl
4930528G23Rik	-0.333757	-5.92927	0.481907	0.613627	aphi_vs_ctrl
4930528H21Rik	-0.868395	-4.39912	0.0554372	0.161924	aphi_vs_ctrl
4930528P14Rik	-0.333247	-6.10601	0.113148	0.204832	aphi_vs_ctrl
4930529C04Rik	-0.424266	-2.33901	0.157716	0.265051	aphi_vs_ctrl
4930529K09Rik	-0.333247	-6.10601	0.113148	0.204832	aphi_vs_ctrl
4930529L06Rik	-0.333247	-6.10601	0.113148	0.204832	aphi_vs_ctrl
4930529N20Rik	-0.333247	-6.10601	0.113148	0.204832	aphi_vs_ctrl
4930532I03Rik	1.72683	-4.93058	0.0280312	0.0970852	aphi_vs_ctrl
4930532M18Rik	-0.333247	-6.10601	0.113148	0.204832	aphi_vs_ctrl
4930533B01Rik	-0.69056	-5.008	0.469992	0.60682	aphi_vs_ctrl
4930533I22Rik	-0.0998508	-0.0157069	0.809299	0.865407	aphi_vs_ctrl
4930533K18Rik	0.1299	-1.56309	0.588393	0.707029	aphi_vs_ctrl
4930533N22Rik	0.195068	0.909496	0.431824	0.574997	aphi_vs_ctrl
4930533P14Rik	-0.333247	-6.10601	0.113148	0.204832	aphi_vs_ctrl
4930535L15Rik	0.388088	-2.56664	0.473609	0.610116	aphi_vs_ctrl
4930535O05Rik	-0.333247	-6.10601	0.113148	0.204832	aphi_vs_ctrl
4930538E20Rik	-0.333247	-6.10601	0.113148	0.204832	aphi_vs_ctrl
4930538K18Rik	0.620303	0.690395	0.0719701	0.195178	aphi_vs_ctrl
4930538L07Rik	-0.332654	-5.93004	0.443148	0.581472	aphi_vs_ctrl
4930539C22Rik	-0.333247	-6.10601	0.113148	0.204832	aphi_vs_ctrl
4930539E08Rik	1.12676	3.56647	0.000287909	0.00444867	aphi_vs_ctrl
4930539J05Rik	-0.840297	-2.02217	0.018472	0.0714101	aphi_vs_ctrl
4930539M17Rik	0.828338	-2.76359	0.0320679	0.106991	aphi_vs_ctrl
4930539N22Rik	0.31467	-4.65782	0.781035	0.844537	aphi_vs_ctrl
4930540M03Rik	-0.333247	-6.10601	0.113148	0.204832	aphi_vs_ctrl
4930542C21Rik	-0.333247	-6.10601	0.113148	0.204832	aphi_vs_ctrl
4930542D17Rik	1.74168	-5.41458	0.00083032	0.0085052	aphi_vs_ctrl
4930542M03Rik	0.182834	-2.51328	0.810747	0.866273	aphi_vs_ctrl
4930542N06Rik	0.968152	-5.18375	0.156947	0.264065	aphi_vs_ctrl
4930543D07Rik	0.328481	-2.23597	0.454229	0.592527	aphi_vs_ctrl
4930543E12Rik	1.06405	-3.93642	0.263157	0.396473	aphi_vs_ctrl
4930543I03Rik	0.208322	-5.75325	0.747293	0.820082	aphi_vs_ctrl
4930543N07Rik	-0.333247	-6.10601	0.113148	0.204832	aphi_vs_ctrl
4930544D05Rik	1.17115	-2.68147	0.234522	0.362464	aphi_vs_ctrl
4930544G11Rik	-0.333218	-5.92952	0.429974	0.573062	aphi_vs_ctrl
4930544M13Rik	-0.332654	-5.93004	0.443147	0.581472	aphi_vs_ctrl
4930545E07Rik	-0.333247	-6.10601	0.113148	0.204832	aphi_vs_ctrl
4930545H06Rik	-0.426141	-1.65476	0.565028	0.688353	aphi_vs_ctrl
4930545L08Rik	-0.334632	-5.755	0.585459	0.704604	aphi_vs_ctrl
4930545L23Rik	0.730908	-5.75152	0.129711	0.227711	aphi_vs_ctrl
4930546C10Rik	0.196887	-5.32083	0.836703	0.884771	aphi_vs_ctrl
4930546K05Rik	0.388982	-0.243328	0.127654	0.224907	aphi_vs_ctrl
4930547E08Rik	1.20868	-4.41805	0.370724	0.515818	aphi_vs_ctrl
4930547E14Rik	0.363202	-5.00781	0.48172	0.613627	aphi_vs_ctrl
4930547H16Rik	-0.333247	-6.10601	0.113148	0.204832	aphi_vs_ctrl
4930547M16Rik	1.44231	-3.80462	0.303603	0.442747	aphi_vs_ctrl
4930548G14Rik	-0.634048	-4.49414	0.564584	0.687928	aphi_vs_ctrl
4930548H24Rik	-0.536983	3.55954	0.00217458	0.0158477	aphi_vs_ctrl
4930548J01Rik	-0.698403	-5.80739	0.124629	0.220669	aphi_vs_ctrl
4930548K13Rik	-0.333247	-6.10601	0.113148	0.204832	aphi_vs_ctrl
4930549C01Rik	0.268868	-1.6873	0.529923	0.656554	aphi_vs_ctrl
4930549C15Rik	0.344191	-3.16001	0.702092	0.785802	aphi_vs_ctrl
4930549G23Rik	-1.08527	-0.274355	0.000352477	0.00500933	aphi_vs_ctrl
4930550C14Rik	0.500486	2.1234	0.107177	0.204832	aphi_vs_ctrl
4930550C17Rik	0.199087	-5.41548	0.828447	0.879048	aphi_vs_ctrl
4930550L24Rik	0.456741	0.0924865	0.36309	0.507855	aphi_vs_ctrl
4930552N02Rik	-0.333247	-6.10601	0.113148	0.204832	aphi_vs_ctrl
4930552P12Rik	1.0551	-2.03382	0.00802866	0.0392895	aphi_vs_ctrl
4930553C11Rik	-0.880199	-1.09898	0.0142842	0.0595968	aphi_vs_ctrl
4930553E22Rik	-0.333247	-6.10601	0.113148	0.204832	aphi_vs_ctrl
4930553J12Rik	-0.333247	-6.10601	0.113148	0.204832	aphi_vs_ctrl
4930553P18Rik	0.471727	-5.06168	0.711604	0.792939	aphi_vs_ctrl
4930554C24Rik	-0.333247	-6.10601	0.113148	0.204832	aphi_vs_ctrl
4930554G24Rik	0.612249	-5.17336	0.18613	0.302324	aphi_vs_ctrl
4930554H23Rik	0.193741	-5.75332	0.774221	0.839267	aphi_vs_ctrl
4930554I06Rik	0.190565	-5.93082	0.646492	0.74773	aphi_vs_ctrl
4930555A03Rik	0.190567	-5.93082	0.64649	0.74773	aphi_vs_ctrl
4930555B11Rik	-0.339479	-4.53482	0.78539	0.847862	aphi_vs_ctrl
4930555B12Rik	-0.333247	-6.10601	0.113148	0.204832	aphi_vs_ctrl
4930555F03Rik	0.157289	0.73195	0.650259	0.750718	aphi_vs_ctrl
4930555G01Rik	-0.283227	-3.96722	0.830495	0.880423	aphi_vs_ctrl
4930555G21Rik	-0.333247	-6.10601	0.113148	0.204832	aphi_vs_ctrl
4930555K05Rik	-0.333247	-6.10601	0.113148	0.204832	aphi_vs_ctrl
4930555M17Rik	-0.333247	-6.10601	0.113148	0.204832	aphi_vs_ctrl
4930556C24Rik	-0.339564	-5.00673	0.474207	0.610312	aphi_vs_ctrl
4930556G01Rik	-0.324815	-5.2228	0.778321	0.842241	aphi_vs_ctrl
4930556J02Rik	-0.333247	-6.10601	0.113148	0.204832	aphi_vs_ctrl
4930556L07Rik	0.727922	-5.75235	0.150296	0.255286	aphi_vs_ctrl
4930556M19Rik	0.298679	0.797684	0.220085	0.344392	aphi_vs_ctrl
4930556N09Rik	0.190566	-5.93082	0.646491	0.74773	aphi_vs_ctrl
4930556N13Rik	0.273587	-1.21475	0.665018	0.757602	aphi_vs_ctrl
4930557B15Rik	-0.333247	-6.10601	0.113148	0.204832	aphi_vs_ctrl
4930557F10Rik	-0.333247	-6.10601	0.113148	0.204832	aphi_vs_ctrl
4930557J02Rik	1.48809	-5.18465	0.0530672	0.156642	aphi_vs_ctrl
4930557K07Rik	-0.68248	-2.19888	0.21659	0.339988	aphi_vs_ctrl
4930558C23Rik	-0.858995	-1.99196	0.336494	0.479877	aphi_vs_ctrl
4930558F17Rik	0.192641	-5.93006	0.666107	0.757602	aphi_vs_ctrl
4930558G05Rik	0.197187	-5.57809	0.704354	0.787566	aphi_vs_ctrl
4930558J18Rik	0.0898965	2.69648	0.639095	0.746816	aphi_vs_ctrl
4930558K02Rik	2.68044	-3.06205	0.0123807	0.0536863	aphi_vs_ctrl
4930559C10Rik	-0.333247	-6.10601	0.113148	0.204832	aphi_vs_ctrl
4930562C15Rik	0.701555	-0.565709	0.0025345	0.0176052	aphi_vs_ctrl
4930562F07Rik	-0.333247	-6.10601	0.113148	0.204832	aphi_vs_ctrl
4930562F17Rik	0.447001	-5.49805	0.501124	0.630506	aphi_vs_ctrl
4930563D23Rik	3.73271	-3.30732	0.00013698	0.00293388	aphi_vs_ctrl
4930563E18Rik	1.39752	-2.3918	0.11232	0.204832	aphi_vs_ctrl
4930563E22Rik	0.81449	0.0325397	0.0650652	0.182331	aphi_vs_ctrl
4930563F08Rik	0.685544	-4.88677	0.393293	0.53899	aphi_vs_ctrl
4930563H07Rik	-0.333247	-6.10601	0.113148	0.204832	aphi_vs_ctrl
4930563I02Rik	-0.315856	-1.30344	0.691375	0.777415	aphi_vs_ctrl
4930563M20Rik	0.867182	-1.81235	0.133245	0.232358	aphi_vs_ctrl
4930563M21Rik	0.690278	-0.344883	0.152816	0.258618	aphi_vs_ctrl
4930564C03Rik	0.171774	-4.38374	0.809906	0.865704	aphi_vs_ctrl
4930564D02Rik	0.19974	-5.40122	0.757442	0.827896	aphi_vs_ctrl
4930565D16Rik	0.970319	-5.31987	0.225812	0.351612	aphi_vs_ctrl
4930565N06Rik	-0.246865	-0.77546	0.54843	0.673736	aphi_vs_ctrl
4930567H12Rik	-0.333247	-6.10601	0.113148	0.204832	aphi_vs_ctrl
4930567H17Rik	-0.333757	-5.92927	0.481908	0.613627	aphi_vs_ctrl
4930567J20Rik	-0.333247	-6.10601	0.113148	0.204832	aphi_vs_ctrl
4930567K12Rik	-0.333247	-6.10601	0.113148	0.204832	aphi_vs_ctrl
4930567K20Rik	-0.333247	-6.10601	0.113148	0.204832	aphi_vs_ctrl
4930568A12Rik	0.804464	-5.17766	0.211142	0.33318	aphi_vs_ctrl
4930568D16Rik	-0.333247	-6.10601	0.113148	0.204832	aphi_vs_ctrl
4930568E12Rik	-0.0264101	-3.5928	0.977742	0.984821	aphi_vs_ctrl
4930568G15Rik	-0.333247	-6.10601	0.113148	0.204832	aphi_vs_ctrl
4930570E03Rik	-0.68072	-5.72694	0.347918	0.49196	aphi_vs_ctrl
4930570G19Rik	0.462463	-2.12239	0.464066	0.600895	aphi_vs_ctrl
4930571K23Rik	-1.10151	-5.84948	0.120242	0.214418	aphi_vs_ctrl
4930571O06Rik	0.847873	-4.53033	0.389966	0.535677	aphi_vs_ctrl
4930572G02Rik	-0.06971	-0.061349	0.750582	0.822819	aphi_vs_ctrl
4930572K03Rik	-0.333247	-6.10601	0.113148	0.204832	aphi_vs_ctrl
4930572O03Rik	-0.333247	-6.10601	0.113148	0.204832	aphi_vs_ctrl
4930572O13Rik	0.438768	-5.46509	0.563855	0.687248	aphi_vs_ctrl
4930573C15Rik	0.213159	-5.26384	0.86069	0.902249	aphi_vs_ctrl
4930573H18Rik	1.45783	-3.21998	0.102407	0.204832	aphi_vs_ctrl
4930573O16Rik	2.85325	-3.87789	0.000521575	0.00639053	aphi_vs_ctrl
4930577N17Rik	0.388881	-1.91148	0.48794	0.618393	aphi_vs_ctrl
4930578C19Rik	-0.912755	-5.48731	0.280716	0.416367	aphi_vs_ctrl
4930578E11Rik	-0.310642	-2.29814	0.580727	0.700914	aphi_vs_ctrl
4930578G10Rik	-0.45121	0.0921954	0.229887	0.356629	aphi_vs_ctrl
4930578I06Rik	-0.333247	-6.10601	0.113148	0.204832	aphi_vs_ctrl
4930578M01Rik	1.25128	-1.21006	0.0132289	0.0563908	aphi_vs_ctrl
4930578N18Rik	-0.333247	-6.10601	0.113148	0.204832	aphi_vs_ctrl
4930579C12Rik	-1.00738	-5.29588	0.166438	0.276472	aphi_vs_ctrl
4930579D09Rik	-0.333247	-6.10601	0.113148	0.204832	aphi_vs_ctrl
4930579F01Rik	1.89645	-4.50739	0.0804076	0.204832	aphi_vs_ctrl
4930579G18Rik	0.185181	1.48424	0.469941	0.606807	aphi_vs_ctrl
4930579G24Rik	0.162493	3.84268	0.289451	0.426182	aphi_vs_ctrl
4930579H20Rik	0.189184	-5.57878	0.780996	0.844537	aphi_vs_ctrl
4930579J19Rik	0.194253	-5.92932	0.661529	0.756942	aphi_vs_ctrl
4930579K19Rik	0.289078	-2.54101	0.649016	0.749593	aphi_vs_ctrl
4930579P08Rik	0.195006	-5.44076	0.793404	0.854092	aphi_vs_ctrl
4930581F22Rik	-0.0797975	-0.549153	0.82951	0.879659	aphi_vs_ctrl
4930583I09Rik	-0.333247	-6.10601	0.113148	0.204832	aphi_vs_ctrl
4930583K01Rik	0.734823	-4.88664	0.521577	0.649448	aphi_vs_ctrl
4930583P06Rik	-0.333247	-6.10601	0.113148	0.204832	aphi_vs_ctrl
4930584F24Rik	-0.333247	-6.10601	0.113148	0.204832	aphi_vs_ctrl
4930586N03Rik	0.197135	-4.97976	0.84972	0.89417	aphi_vs_ctrl
4930587E11Rik	-0.333247	-6.10601	0.113148	0.204832	aphi_vs_ctrl
4930588K23Rik	1.72844	-4.72181	0.114533	0.206569	aphi_vs_ctrl
4930589L23Rik	1.16769	-4.26385	0.302972	0.441952	aphi_vs_ctrl
4930590J08Rik	1.55138	0.385844	0.000825656	0.0084673	aphi_vs_ctrl
4930590L14Rik	-0.333247	-6.10601	0.113148	0.204832	aphi_vs_ctrl
4930590L20Rik	-0.0252637	0.333648	0.907385	0.935847	aphi_vs_ctrl
4930591A17Rik	0.0617138	2.77661	0.698202	0.783017	aphi_vs_ctrl
4930591E09Rik	-0.333247	-6.10601	0.113148	0.204832	aphi_vs_ctrl
4930592A05Rik	-0.858622	-5.93019	0.0671805	0.18541	aphi_vs_ctrl
4930592C13Rik	0.740556	-4.41095	0.31554	0.456273	aphi_vs_ctrl
4930592I03Rik	1.55375	-3.80079	0.0159071	0.0643347	aphi_vs_ctrl
4930593A02Rik	-0.333218	-5.92952	0.429973	0.573062	aphi_vs_ctrl
4930593C16Rik	-0.371776	-3.224	0.524595	0.652117	aphi_vs_ctrl
4930594C11Rik	0.268138	-1.23922	0.353231	0.497334	aphi_vs_ctrl
4930594O21Rik	-0.820089	-5.26184	0.0894533	0.204832	aphi_vs_ctrl
4930595D18Rik	0.211257	-3.91798	0.732686	0.809028	aphi_vs_ctrl
4930595L18Rik	-0.333247	-6.10601	0.113148	0.204832	aphi_vs_ctrl
4930595M18Rik	0.724792	-5.75337	0.148375	0.252848	aphi_vs_ctrl
4930596D02Rik	-0.333247	-6.10601	0.113148	0.204832	aphi_vs_ctrl
4930596I21Rik	0.25958	-2.1337	0.42886	0.573062	aphi_vs_ctrl
4930597A21Rik	0.441542	-5.84732	0.479858	0.613627	aphi_vs_ctrl
4930597G03Rik	-0.42545	-1.04868	0.0287223	0.098807	aphi_vs_ctrl
4930598F16Rik	0.447031	-4.92634	0.684188	0.771829	aphi_vs_ctrl
4930599N23Rik	-0.939395	-1.13411	0.000302428	0.00457764	aphi_vs_ctrl
4931400O07Rik	-0.333247	-6.10601	0.113148	0.204832	aphi_vs_ctrl
4931402G19Rik	0.496974	-0.919748	0.0490324	0.147333	aphi_vs_ctrl
4931403E22Rik	-0.093143	-4.76177	0.928448	0.950281	aphi_vs_ctrl
4931403G20Rik	0.258056	-0.163021	0.468338	0.605083	aphi_vs_ctrl
4931403M11Rik	0.50549	-2.22912	0.0491924	0.147716	aphi_vs_ctrl
4931406B18Rik	0.593178	-3.25612	0.587084	0.705903	aphi_vs_ctrl
4931406C07Rik	0.525529	2.31899	0.0556552	0.16243	aphi_vs_ctrl
4931406H21Rik	0.486356	0.45588	0.160394	0.26874	aphi_vs_ctrl
4931406P16Rik	-0.0944344	6.81931	0.355498	0.499767	aphi_vs_ctrl
4931408C20Rik	-0.333247	-6.10601	0.113148	0.204832	aphi_vs_ctrl
4931408D14Rik	0.762129	-0.908344	0.0285077	0.0982371	aphi_vs_ctrl
4931409K22Rik	2.57375	-1.3529	0.000393704	0.00537152	aphi_vs_ctrl
4931413K12Rik	-0.0884568	-3.07841	0.86269	0.903553	aphi_vs_ctrl
4931414P19Rik	-0.661922	3.5033	0.000937405	0.00921332	aphi_vs_ctrl
4931415C17Rik	0.817389	-1.16343	0.140175	0.241854	aphi_vs_ctrl
4931417E11Rik	-0.333247	-6.10601	0.113148	0.204832	aphi_vs_ctrl
4931419H13Rik	-0.334888	-4.47952	0.809874	0.865704	aphi_vs_ctrl
4931420L22Rik	-0.175492	-0.875078	0.70232	0.786008	aphi_vs_ctrl
4931422A03Rik	-0.212842	-2.48434	0.562061	0.685728	aphi_vs_ctrl
4931423N10Rik	1.34545	-0.441032	0.000902775	0.00898527	aphi_vs_ctrl
4931428F04Rik	-0.815587	2.84675	0.00194328	0.0147785	aphi_vs_ctrl
4931428L18Rik	-0.521613	0.233138	0.17927	0.293659	aphi_vs_ctrl
4931429L15Rik	1.3804	-2.58255	0.0723168	0.195977	aphi_vs_ctrl
4931429P17Rik	0.438875	-5.67099	0.581838	0.701741	aphi_vs_ctrl
4931430N09Rik	0.192568	-5.75258	0.683959	0.771667	aphi_vs_ctrl
4931431B13Rik	-0.333247	-6.10601	0.113148	0.204832	aphi_vs_ctrl
4931431C16Rik	3.39132	-1.59351	0.00574042	0.0308232	aphi_vs_ctrl
4931431F19Rik	-0.333247	-6.10601	0.113148	0.204832	aphi_vs_ctrl
4931439C15Rik	-0.333247	-6.10601	0.113148	0.204832	aphi_vs_ctrl
4931440F15Rik	1.98788	-2.40036	0.00266509	0.0181259	aphi_vs_ctrl
4931440J10Rik	-0.333247	-6.10601	0.113148	0.204832	aphi_vs_ctrl
4931440P22Rik	-0.814843	-0.595473	0.00537548	0.0293384	aphi_vs_ctrl
4932411N23Rik	-0.222182	-3.48846	0.661711	0.757075	aphi_vs_ctrl
4932412D23Rik	0.408445	-0.538479	0.349906	0.494018	aphi_vs_ctrl
4932413F04Rik	-0.316449	-3.37649	0.540596	0.666763	aphi_vs_ctrl
4932414J04Rik	0.441543	-5.84732	0.479857	0.613627	aphi_vs_ctrl
4932414N04Rik	-0.619934	-1.4084	0.131578	0.229928	aphi_vs_ctrl
4932415M13Rik	0.746363	-5.74627	0.122932	0.218268	aphi_vs_ctrl
4932416H05Rik	-0.941514	1.19707	0.00347537	0.0216305	aphi_vs_ctrl
4932416K20Rik	-0.333247	-6.10601	0.113148	0.204832	aphi_vs_ctrl
4932429P05Rik	-0.333247	-6.10601	0.113148	0.204832	aphi_vs_ctrl
4932431L22Rik	0.243474	-4.02921	0.789812	0.851128	aphi_vs_ctrl
4932431P20Rik	3.19332	-1.9331	0.0124815	0.0540002	aphi_vs_ctrl
4932435O22Rik	1.21655	-5.01945	0.10209	0.204832	aphi_vs_ctrl
4932438A13Rik	-0.183397	6.15217	0.372703	0.517835	aphi_vs_ctrl
4932438H23Rik	0.243468	-2.91955	0.580093	0.700398	aphi_vs_ctrl
4932441J04Rik	-0.333247	-6.10601	0.113148	0.204832	aphi_vs_ctrl
4932443I19Rik	0.126136	-0.461224	0.743527	0.817131	aphi_vs_ctrl
4932443L11Rik	-0.00504429	0.0236788	0.987832	0.991698	aphi_vs_ctrl
4932702P03Rik	-1.28281	-3.32612	0.187635	0.304119	aphi_vs_ctrl
4933400A11Rik	0.435286	-5.46494	0.567716	0.690789	aphi_vs_ctrl
4933400B14Rik	-0.333247	-6.10601	0.113148	0.204832	aphi_vs_ctrl
4933400C23Rik	-0.333247	-6.10601	0.113148	0.204832	aphi_vs_ctrl
4933400F21Rik	0.178299	-0.271946	0.650258	0.750718	aphi_vs_ctrl
4933400L20Rik	-0.333219	-5.84756	0.570042	0.69234	aphi_vs_ctrl
4933401B06Rik	1.22048	-3.6028	0.212302	0.334615	aphi_vs_ctrl
4933401D09Rik	-0.152802	-0.725809	0.790965	0.85196	aphi_vs_ctrl
4933401H06Rik	-0.333247	-6.10601	0.113148	0.204832	aphi_vs_ctrl
4933402C05Rik	0.716312	-5.40124	0.404254	0.549926	aphi_vs_ctrl
4933402C06Rik	-0.333249	-5.5768	0.112996	0.204832	aphi_vs_ctrl
4933402D24Rik	-0.0839744	-2.24465	0.874812	0.912162	aphi_vs_ctrl
4933402E13Rik	3.18337	3.2072	9.62428e-06	0.00103294	aphi_vs_ctrl
4933402J07Rik	1.49951	-4.62297	0.0079714	0.0391045	aphi_vs_ctrl
4933402J10Rik	-0.333247	-6.10601	0.113148	0.204832	aphi_vs_ctrl
4933402J15Rik	1.66759	-5.08966	0.0441834	0.136087	aphi_vs_ctrl
4933402N03Rik	-0.333247	-6.10601	0.113148	0.204832	aphi_vs_ctrl
4933402N22Rik	-0.333247	-6.10601	0.113148	0.204832	aphi_vs_ctrl
4933402P03Rik	0.162978	-3.86871	0.748384	0.820949	aphi_vs_ctrl
4933403O08Rik	1.42467	-3.68493	0.159791	0.267929	aphi_vs_ctrl
4933404G15Rik	-0.332654	-5.93004	0.443148	0.581472	aphi_vs_ctrl
4933404K08Rik	0.0521226	-1.54694	0.869447	0.908323	aphi_vs_ctrl
4933404K13Rik	0.442295	-5.49557	0.489596	0.619883	aphi_vs_ctrl
4933404O12Rik	-0.515346	4.23868	0.00204937	0.0153022	aphi_vs_ctrl
4933405D12Rik	0.313729	-3.09021	0.725412	0.803228	aphi_vs_ctrl
4933405E24Rik	-0.333247	-6.10601	0.113148	0.204832	aphi_vs_ctrl
4933405L10Rik	0.0983307	-1.99982	0.771553	0.837118	aphi_vs_ctrl
4933405O20Rik	-0.333247	-6.10601	0.113148	0.204832	aphi_vs_ctrl
4933406B17Rik	1.53782	-0.878519	0.000950301	0.00927454	aphi_vs_ctrl
4933406C10Rik	1.1708	-4.05991	0.0633395	0.178783	aphi_vs_ctrl
4933406D12Rik	0.720767	-5.57889	0.186177	0.302373	aphi_vs_ctrl
4933406F09Rik	-0.331247	-5.49072	0.696384	0.781683	aphi_vs_ctrl
4933406G16Rik	-0.332654	-5.93004	0.443148	0.581472	aphi_vs_ctrl
4933406I18Rik	-0.612743	-6.01242	0.0809056	0.204832	aphi_vs_ctrl
4933406J10Rik	-0.951578	-2.6432	0.0207236	0.0777624	aphi_vs_ctrl
4933406K04Rik	0.190565	-5.93082	0.646492	0.74773	aphi_vs_ctrl
4933406M09Rik	0.591861	-3.276	0.0621725	0.17637	aphi_vs_ctrl
4933407E24Rik	0.720821	-5.75486	0.131352	0.229828	aphi_vs_ctrl
4933407G14Rik	0.276565	-1.3623	0.306783	0.446468	aphi_vs_ctrl
4933407I05Rik	0.195655	-5.44194	0.731406	0.808093	aphi_vs_ctrl
4933407K13Rik	-0.220493	2.43483	0.174279	0.28711	aphi_vs_ctrl
4933407L21Rik	0.833737	-4.07334	0.261277	0.394298	aphi_vs_ctrl
4933408B17Rik	0.573745	0.540239	0.0484045	0.145859	aphi_vs_ctrl
4933408J17Rik	0.0756006	-4.83165	0.944269	0.960872	aphi_vs_ctrl
4933408N05Rik	-0.129984	0.425072	0.624407	0.735904	aphi_vs_ctrl
4933409F18Rik	0.449892	-4.24914	0.702314	0.786008	aphi_vs_ctrl
4933409G03Rik	-0.825667	-4.14021	0.0408652	0.128459	aphi_vs_ctrl
4933409K07Rik	-0.160802	4.13295	0.109206	0.204832	aphi_vs_ctrl
4933411E08Rik	0.627699	-1.20969	0.338533	0.481968	aphi_vs_ctrl
4933411G06Rik	-0.333247	-6.10601	0.113148	0.204832	aphi_vs_ctrl
4933411K16Rik	1.61211	-2.41406	0.0131229	0.056071	aphi_vs_ctrl
4933412E12Rik	1.49436	-2.95718	0.0211865	0.0790648	aphi_vs_ctrl
4933412E24Rik	-0.335756	-5.40171	0.625539	0.736806	aphi_vs_ctrl
4933412O06Rik	-0.333247	-6.10601	0.113148	0.204832	aphi_vs_ctrl
4933413G19Rik	0.855904	-4.53977	0.395114	0.540707	aphi_vs_ctrl
4933413J09Rik	1.5528	-0.720784	0.0034049	0.0213435	aphi_vs_ctrl
4933413L06Rik	0.308694	-1.48697	0.356187	0.500658	aphi_vs_ctrl
4933414I15Rik	0.194253	-5.92932	0.661529	0.756942	aphi_vs_ctrl
4933415F23Rik	-0.582399	-4.92578	0.656109	0.755349	aphi_vs_ctrl
4933416C03Rik	2.01425	-1.78196	0.044059	0.135762	aphi_vs_ctrl
4933416E03Rik	-0.333247	-6.10601	0.113148	0.204832	aphi_vs_ctrl
4933416I08Rik	0.813848	-5.23758	0.207393	0.328351	aphi_vs_ctrl
4933416M06Rik	0.158117	-2.28533	0.748058	0.82069	aphi_vs_ctrl
4933416M07Rik	1.89501	-1.45566	0.134863	0.234555	aphi_vs_ctrl
4933416O17Rik	-0.333247	-6.10601	0.113148	0.204832	aphi_vs_ctrl
4933417A18Rik	-0.0769213	-2.8949	0.868344	0.907563	aphi_vs_ctrl
4933417D19Rik	-0.0435152	-1.63276	0.923083	0.946799	aphi_vs_ctrl
4933417E11Rik	-0.332654	-5.93004	0.443148	0.581472	aphi_vs_ctrl
4933417G07Rik	-0.33362	-5.40104	0.667771	0.758801	aphi_vs_ctrl
4933417O13Rik	1.49863	-5.2393	0.12205	0.21699	aphi_vs_ctrl
4933421I07Rik	-0.333247	-6.10601	0.113148	0.204832	aphi_vs_ctrl
4933421O10Rik	0.202324	0.881029	0.380452	0.525735	aphi_vs_ctrl
4933422A05Rik	0.089846	-3.374	0.908549	0.936681	aphi_vs_ctrl
4933423P22Rik	1.5527	-0.53382	0.0159729	0.0645009	aphi_vs_ctrl
4933424G05Rik	0.318231	-2.82514	0.659656	0.756942	aphi_vs_ctrl
4933424G06Rik	1.87255	-4.05133	0.0826104	0.204832	aphi_vs_ctrl
4933424M12Rik	1.37037	-5.54221	0.108976	0.204832	aphi_vs_ctrl
4933425B07Rik	-0.857557	-5.4965	0.237024	0.36551	aphi_vs_ctrl
4933425L06Rik	0.272543	-4.20056	0.59555	0.712693	aphi_vs_ctrl
4933427D06Rik	-0.33022	3.01873	0.0689258	0.189019	aphi_vs_ctrl
4933427D14Rik	0.161542	4.51609	0.297484	0.435604	aphi_vs_ctrl
4933427E11Rik	0.347463	-1.79965	0.62659	0.737634	aphi_vs_ctrl
4933427E13Rik	-0.333247	-6.10601	0.113148	0.204832	aphi_vs_ctrl
4933427G17Rik	0.257692	-1.78754	0.496551	0.626264	aphi_vs_ctrl
4933427G23Rik	-1.34534	-2.28618	0.0282179	0.0975887	aphi_vs_ctrl
4933427I22Rik	1.12279	-4.54895	0.347148	0.491179	aphi_vs_ctrl
4933428C19Rik	-0.441916	-4.6656	0.742516	0.816529	aphi_vs_ctrl
4933428G20Rik	0.999667	-0.512909	0.00509934	0.0283707	aphi_vs_ctrl
4933428M09Rik	1.43574	-3.77928	0.0869432	0.204832	aphi_vs_ctrl
4933429K18Rik	1.33811	-4.10989	0.0236012	0.0855001	aphi_vs_ctrl
4933429O19Rik	2.10669	-2.99549	0.0152615	0.0624718	aphi_vs_ctrl
4933430H16Rik	-0.860077	-5.75422	0.196722	0.315529	aphi_vs_ctrl
4933430I17Rik	1.03585	1.6465	0.00180017	0.0140748	aphi_vs_ctrl
4933430M04Rik	0.190566	-5.93082	0.646491	0.74773	aphi_vs_ctrl
4933430N04Rik	-0.333247	-6.10601	0.113148	0.204832	aphi_vs_ctrl
4933431E20Rik	-0.0722175	1.80978	0.791435	0.852327	aphi_vs_ctrl
4933431G14Rik	0.936526	-3.00412	0.160502	0.268872	aphi_vs_ctrl
4933431J24Rik	0.859951	-1.70221	0.0520395	0.154326	aphi_vs_ctrl
4933431K23Rik	-1.27248	-5.49026	0.0908488	0.204832	aphi_vs_ctrl
4933432G23Rik	2.50469	-3.17532	0.0139397	0.058569	aphi_vs_ctrl
4933432I03Rik	-0.332654	-5.93004	0.443148	0.581472	aphi_vs_ctrl
4933432I09Rik	0.968221	-5.49701	0.161935	0.270608	aphi_vs_ctrl
4933432K03Rik	1.21572	-5.15578	0.0778057	0.204832	aphi_vs_ctrl
4933433F19Rik	-0.333247	-6.10601	0.113148	0.204832	aphi_vs_ctrl
4933433G08Rik	1.73092	-4.65067	0.108159	0.204832	aphi_vs_ctrl
4933433G15Rik	0.302119	-1.1111	0.386394	0.531812	aphi_vs_ctrl
4933433G19Rik	-0.195425	-0.687287	0.632176	0.741822	aphi_vs_ctrl
4933433H22Rik	1.52569	-3.92445	0.156439	0.263435	aphi_vs_ctrl
4933433N18Rik	-0.335026	-5.755	0.585028	0.704249	aphi_vs_ctrl
4933434E20Rik	-0.0843258	5.17275	0.513334	0.641669	aphi_vs_ctrl
4933436E23Rik	-0.332632	-5.84818	0.578461	0.698991	aphi_vs_ctrl
4933436H12Rik	-0.333771	-5.84725	0.60385	0.719054	aphi_vs_ctrl
4933436I01Rik	-0.333247	-6.10601	0.113148	0.204832	aphi_vs_ctrl
4933438B17Rik	-0.333247	-6.10601	0.113148	0.204832	aphi_vs_ctrl
4933438K21Rik	0.394051	3.75282	0.0451138	0.138176	aphi_vs_ctrl
4933439C10Rik	0.0161355	1.19871	0.96143	0.973143	aphi_vs_ctrl
4933439K11Rik	0.801388	-2.22869	0.206408	0.327223	aphi_vs_ctrl
4933440J02Rik	-0.21327	-4.65719	0.865499	0.905426	aphi_vs_ctrl
4933440M02Rik	-0.467878	-4.06367	0.532595	0.659165	aphi_vs_ctrl
4933440N22Rik	-0.696684	0.866151	0.0147092	0.0608786	aphi_vs_ctrl
5031410I06Rik	0.397495	-4.68641	0.484585	0.615478	aphi_vs_ctrl
5031414D18Rik	0.0562057	-0.160892	0.785754	0.848128	aphi_vs_ctrl
5031425E22Rik	-0.16757	1.99909	0.456481	0.594735	aphi_vs_ctrl
5031425F14Rik	0.437218	-5.32211	0.486142	0.617	aphi_vs_ctrl
5031426D15Rik	0.563507	0.332751	0.0808175	0.204832	aphi_vs_ctrl
5031434C07Rik	1.64303	-3.69769	0.0413479	0.129639	aphi_vs_ctrl
5031434O11Rik	0.439426	-5.8482	0.483744	0.614735	aphi_vs_ctrl
5031439G07Rik	0.236118	5.08053	0.157262	0.264472	aphi_vs_ctrl
5033403F01Rik	0.332675	-2.28399	0.509119	0.637969	aphi_vs_ctrl
5033403H07Rik	0.192085	-5.67324	0.708365	0.790962	aphi_vs_ctrl
5033404E19Rik	1.88115	0.505413	4.17882e-05	0.00166841	aphi_vs_ctrl
5033406O09Rik	1.95416	1.50195	7.37051e-05	0.00219772	aphi_vs_ctrl
5033417F24Rik	1.1096	-0.26643	0.0383091	0.122187	aphi_vs_ctrl
5033421B08Rik	0.481784	-0.873109	0.296526	0.434546	aphi_vs_ctrl
5033426O07Rik	0.766059	-4.25822	0.276407	0.411316	aphi_vs_ctrl
5033428I22Rik	-0.333218	-5.92952	0.429973	0.573062	aphi_vs_ctrl
5033430I15Rik	0.537261	-1.53051	0.176488	0.290049	aphi_vs_ctrl
5330411J11Rik	-0.113005	2.43477	0.226001	0.351842	aphi_vs_ctrl
5330413P13Rik	-0.686925	-1.66403	0.0173889	0.0683629	aphi_vs_ctrl
5330416C01Rik	-0.423177	-1.2629	0.340705	0.484297	aphi_vs_ctrl
5330417C22Rik	1.84016	0.943733	0.0104406	0.0473453	aphi_vs_ctrl
5330432E05Rik	0.622004	4.06514	0.0352181	0.114726	aphi_vs_ctrl
5330434G04Rik	-0.855938	-5.4966	0.176983	0.290691	aphi_vs_ctrl
5330439A09Rik	0.529808	-3.87883	0.369462	0.514478	aphi_vs_ctrl
5330439B14Rik	0.194252	-5.92932	0.661531	0.756942	aphi_vs_ctrl
5430401F13Rik	-0.333247	-6.10601	0.113148	0.204832	aphi_vs_ctrl
5430401H09Rik	-0.892598	-3.87826	0.516612	0.644812	aphi_vs_ctrl
5430402E10Rik	-0.333247	-6.10601	0.113148	0.204832	aphi_vs_ctrl
5430402O13Rik	0.886176	-2.89049	0.401946	0.54786	aphi_vs_ctrl
5430403N17Rik	0.722885	-5.14281	0.203583	0.323713	aphi_vs_ctrl
5430405H02Rik	-0.100466	1.98443	0.701881	0.785614	aphi_vs_ctrl
5430416N02Rik	0.371691	3.79385	0.154198	0.260494	aphi_vs_ctrl
5430416O09Rik	-0.258228	-2.32824	0.466121	0.602844	aphi_vs_ctrl
5430419D17Rik	1.21678	-4.57573	0.239272	0.368328	aphi_vs_ctrl
5430421F17Rik	-0.372686	-1.58186	0.0463284	0.140941	aphi_vs_ctrl
5430425K12Rik	1.37947	-5.27677	0.141639	0.243822	aphi_vs_ctrl
5430427M07Rik	0.437425	-2.45702	0.388114	0.533713	aphi_vs_ctrl
5430427O19Rik	-0.204351	-0.476831	0.481117	0.613627	aphi_vs_ctrl
5430428K19Rik	-0.110417	-0.722977	0.631535	0.741286	aphi_vs_ctrl
5430431A17Rik	0.462572	-4.09611	0.605109	0.720078	aphi_vs_ctrl
5430434I15Rik	-0.333247	-6.10601	0.113148	0.204832	aphi_vs_ctrl
5430435K18Rik	-0.332654	-5.93004	0.443148	0.581472	aphi_vs_ctrl
5430437J10Rik	0.0351568	-2.29869	0.957036	0.970039	aphi_vs_ctrl
5430440P10Rik	0.907078	-2.40053	0.0927131	0.204832	aphi_vs_ctrl
5530400C23Rik	-0.333247	-6.10601	0.113148	0.204832	aphi_vs_ctrl
5530401A14Rik	-0.333247	-6.10601	0.113148	0.204832	aphi_vs_ctrl
5530601H04Rik	-0.256401	2.96623	0.00645775	0.0335686	aphi_vs_ctrl
5730403I07Rik	-0.22614	-5.14868	0.863374	0.904038	aphi_vs_ctrl
5730405O15Rik	-0.427408	0.957273	0.0527233	0.155891	aphi_vs_ctrl
5730408K05Rik	-0.486308	6.06233	0.089551	0.204832	aphi_vs_ctrl
5730409E04Rik	0.33086	1.73456	0.183156	0.298659	aphi_vs_ctrl
5730409K12Rik	-0.348411	-2.85884	0.688621	0.775426	aphi_vs_ctrl
5730412P04Rik	0.437115	-5.84912	0.462646	0.599488	aphi_vs_ctrl
5730416F02Rik	0.852136	-5.0067	0.389773	0.535525	aphi_vs_ctrl
5730419F03Rik	0.568985	-0.527953	0.381191	0.526555	aphi_vs_ctrl
5730420D15Rik	-0.52428	-3.33467	0.526865	0.653863	aphi_vs_ctrl
5730422E09Rik	1.05732	-1.8185	0.0280163	0.0970679	aphi_vs_ctrl
5730435O14Rik	-0.333247	-6.10601	0.113148	0.204832	aphi_vs_ctrl
5730455P16Rik	-0.142095	4.49991	0.146709	0.250641	aphi_vs_ctrl
5730460C07Rik	0.658271	-2.57455	0.429091	0.573062	aphi_vs_ctrl
5730480H06Rik	0.120802	-0.932549	0.611061	0.7254	aphi_vs_ctrl
5730488B01Rik	-0.333247	-6.10601	0.113148	0.204832	aphi_vs_ctrl
5730507C01Rik	-0.0838957	4.19823	0.311658	0.451762	aphi_vs_ctrl
5730508B09Rik	0.749402	-0.332833	0.0680209	0.187176	aphi_vs_ctrl
5730522E02Rik	-1.02205	-2.47931	0.0887906	0.204832	aphi_vs_ctrl
5730559C18Rik	0.0831674	3.49005	0.43173	0.574914	aphi_vs_ctrl
5730596B20Rik	1.41942	-4.09385	0.0621398	0.176291	aphi_vs_ctrl
5830403F22Rik	0.268865	0.82129	0.506312	0.635596	aphi_vs_ctrl
5830411N06Rik	0.194252	-5.92932	0.66153	0.756942	aphi_vs_ctrl
5830416I19Rik	-0.979379	-2.78899	0.141834	0.244053	aphi_vs_ctrl
5830417I10Rik	-0.355382	6.61668	0.00177302	0.013941	aphi_vs_ctrl
5830418P13Rik	2.57721	2.53032	4.18383e-05	0.00166841	aphi_vs_ctrl
5830428M24Rik	2.50478	-3.90909	0.00207241	0.0153908	aphi_vs_ctrl
5830432E09Rik	2.88287	-4.29493	0.00223151	0.0160873	aphi_vs_ctrl
5830444B04Rik	0.520535	-1.74596	0.48215	0.613851	aphi_vs_ctrl
5830454E08Rik	-0.330042	-2.11871	0.243571	0.373387	aphi_vs_ctrl
5830473C10Rik	0.158114	-5.66751	0.841398	0.88797	aphi_vs_ctrl
5930403L14Rik	-0.384498	-2.4038	0.495156	0.625259	aphi_vs_ctrl
5930403N24Rik	-0.0387171	-0.272225	0.857321	0.89976	aphi_vs_ctrl
5930412G12Rik	-0.0424219	1.23113	0.847556	0.892412	aphi_vs_ctrl
5930430L01Rik	0.486478	1.67572	0.00965647	0.0447431	aphi_vs_ctrl
5930438M14Rik	1.82469	-3.50464	0.0395318	0.125244	aphi_vs_ctrl
6030407O03Rik	0.782165	-1.36898	0.0204746	0.0770212	aphi_vs_ctrl
6030408B16Rik	-0.020395	-1.54627	0.97048	0.979689	aphi_vs_ctrl
6030419C18Rik	0.328532	1.40893	0.0433025	0.133885	aphi_vs_ctrl
6030426L16Rik	-0.319176	4.10655	0.101022	0.204832	aphi_vs_ctrl
6030440G07Rik	0.355519	-0.561136	0.176107	0.289553	aphi_vs_ctrl
6030443J06Rik	0.165456	2.85	0.436482	0.579557	aphi_vs_ctrl
6030458C11Rik	0.0495661	6.58563	0.47932	0.613627	aphi_vs_ctrl
6030466F02Rik	0.440575	-4.74382	0.47416	0.610295	aphi_vs_ctrl
6030468B19Rik	1.52551	-3.78616	0.0573485	0.166064	aphi_vs_ctrl
6030469F06Rik	-0.333247	-6.10601	0.113148	0.204832	aphi_vs_ctrl
6030471H07Rik	-0.333757	-5.92927	0.481908	0.613627	aphi_vs_ctrl
6030498E09Rik	-0.333247	-6.10601	0.113148	0.204832	aphi_vs_ctrl
6230400D17Rik	-0.105081	-0.407263	0.781119	0.844537	aphi_vs_ctrl
6330403K07Rik	0.312996	-0.70836	0.434159	0.577277	aphi_vs_ctrl
6330407A03Rik	-0.293523	0.654712	0.147317	0.251431	aphi_vs_ctrl
6330408A02Rik	-0.93954	2.47679	0.000198232	0.00356279	aphi_vs_ctrl
6330409D20Rik	-1.22506	-4.04478	0.163526	0.272693	aphi_vs_ctrl
6330410L21Rik	-0.525346	1.81815	0.00419544	0.0246299	aphi_vs_ctrl
6330415B21Rik	0.334927	-4.64646	0.77604	0.840654	aphi_vs_ctrl
6330415G19Rik	-0.485296	0.140355	0.0791542	0.204832	aphi_vs_ctrl
6330416G13Rik	-0.723381	2.55842	0.00664842	0.0342692	aphi_vs_ctrl
6330418K02Rik	0.828758	-0.540469	0.0136357	0.0576967	aphi_vs_ctrl
6330420H09Rik	-0.333247	-6.10601	0.113148	0.204832	aphi_vs_ctrl
6330549D23Rik	-0.209731	-0.169318	0.607707	0.722365	aphi_vs_ctrl
6430411K18Rik	0.640262	1.65529	0.261346	0.39434	aphi_vs_ctrl
6430503K07Rik	2.30428	-2.37566	0.0065732	0.0339783	aphi_vs_ctrl
6430531B16Rik	2.17205	1.03282	0.000263823	0.00422595	aphi_vs_ctrl
6430548M08Rik	2.11733	1.01656	5.68714e-05	0.00193085	aphi_vs_ctrl
6430550D23Rik	0.0640953	0.560729	0.881595	0.917067	aphi_vs_ctrl
6430553K19Rik	0.212651	-2.40279	0.720039	0.799187	aphi_vs_ctrl
6430562O15Rik	-0.296965	-1.28842	0.518617	0.646733	aphi_vs_ctrl
6430571L13Rik	-0.00352857	-0.751935	0.989493	0.992924	aphi_vs_ctrl
6430573F11Rik	0.705587	-0.0664046	0.0336388	0.110839	aphi_vs_ctrl
6430584L05Rik	0.606465	-5.79334	0.418163	0.563319	aphi_vs_ctrl
6430590A07Rik	0.394307	-2.4663	0.601594	0.718049	aphi_vs_ctrl
6430590A10Rik	-1.50063	-1.78893	0.00234414	0.0166539	aphi_vs_ctrl
6430628N08Rik	2.55086	-3.63558	0.00355984	0.021972	aphi_vs_ctrl
6430706D22Rik	0.0521914	3.72245	0.466583	0.603285	aphi_vs_ctrl
6430710C18Rik	4.31941	-2.07158	0.000342016	0.00492763	aphi_vs_ctrl
6530402F18Rik	-0.0257339	-2.44271	0.955022	0.968572	aphi_vs_ctrl
6530403H02Rik	0.0985068	2.63997	0.681725	0.770035	aphi_vs_ctrl
6530411M01Rik	0.197523	-5.41391	0.818217	0.871605	aphi_vs_ctrl
6720432D03Rik	0.436413	-5.6724	0.587075	0.705903	aphi_vs_ctrl
6720468P15Rik	4.41765	-1.48619	1.30605e-05	0.00116065	aphi_vs_ctrl
6720483E21Rik	-0.860299	-4.28796	0.436087	0.579115	aphi_vs_ctrl
6720489N17Rik	0.547319	3.40979	0.00685885	0.035064	aphi_vs_ctrl
6820408C15Rik	0.176196	0.658797	0.638133	0.746262	aphi_vs_ctrl
6820426E19Rik	-0.333247	-6.10601	0.113148	0.204832	aphi_vs_ctrl
6820431F20Rik	-0.234148	7.14364	0.242837	0.372514	aphi_vs_ctrl
7420426K07Rik	2.21675	-4.06692	0.0766106	0.20442	aphi_vs_ctrl
7420461P10Rik	-0.843838	-5.75408	0.204639	0.325001	aphi_vs_ctrl
7420700N18Rik	-0.242574	-1.39144	0.458298	0.596394	aphi_vs_ctrl
7420701I03Rik	-0.0225044	-4.10079	0.987021	0.991104	aphi_vs_ctrl
7530416G11Rik	0.56416	-1.49303	0.273899	0.408471	aphi_vs_ctrl
7530428D23Rik	1.40565	-4.87239	0.217683	0.341355	aphi_vs_ctrl
7630403G23Rik	-0.333247	-6.10601	0.113148	0.204832	aphi_vs_ctrl
8030411F24Rik	4.08637	0.404051	2.7348e-05	0.00141172	aphi_vs_ctrl
8030423F21Rik	-0.42339	0.455227	0.172537	0.28468	aphi_vs_ctrl
8030423J24Rik	0.439426	-5.8482	0.483744	0.614735	aphi_vs_ctrl
8030442B05Rik	1.19553	-3.7529	0.0196162	0.0745427	aphi_vs_ctrl
8030443G20Rik	-0.333247	-6.10601	0.113148	0.204832	aphi_vs_ctrl
8030451A03Rik	0.19485	-5.75408	0.762982	0.831549	aphi_vs_ctrl
8030451O07Rik	-0.333247	-6.10601	0.113148	0.204832	aphi_vs_ctrl
8030453O22Rik	0.690144	0.360527	0.0701792	0.191545	aphi_vs_ctrl
8030455M16Rik	1.52945	-3.73634	0.00773067	0.038233	aphi_vs_ctrl
8030462N17Rik	-0.382141	6.39608	0.00357888	0.022058	aphi_vs_ctrl
8030474K03Rik	1.5888	3.19152	4.65149e-06	0.000866965	aphi_vs_ctrl
8430408G22Rik	0.267068	-2.65615	0.569861	0.69234	aphi_vs_ctrl
8430415O14Rik	0.606465	-5.79334	0.418163	0.563319	aphi_vs_ctrl
8430419K02Rik	1.3858	-1.94443	0.0421168	0.131355	aphi_vs_ctrl
8430422H06Rik	0.42518	-5.04449	0.569277	0.692293	aphi_vs_ctrl
8430423G03Rik	0.190566	-5.93082	0.646491	0.74773	aphi_vs_ctrl
8430426J06Rik	0.00114081	-4.7773	0.999171	0.999364	aphi_vs_ctrl
8430429K09Rik	0.480728	1.54689	0.113443	0.205119	aphi_vs_ctrl
8430430B14Rik	0.592867	-1.42795	0.0352843	0.114911	aphi_vs_ctrl
8430431K14Rik	-0.891107	-4.59345	0.394168	0.539836	aphi_vs_ctrl
8430436N08Rik	-0.333247	-6.10601	0.113148	0.204832	aphi_vs_ctrl
8430437L04Rik	1.25992	-4.87271	0.0820561	0.204832	aphi_vs_ctrl
9030025P20Rik	-0.274246	4.64709	0.123051	0.218437	aphi_vs_ctrl
9030204H09Rik	-0.91681	-3.10039	0.236617	0.365033	aphi_vs_ctrl
9030404E10Rik	1.14757	-1.18725	0.00950124	0.0442563	aphi_vs_ctrl
9030612E09Rik	-1.09045	-3.88341	0.270209	0.404419	aphi_vs_ctrl
9030616G12Rik	-0.333247	-6.10601	0.113148	0.204832	aphi_vs_ctrl
9030617O03Rik	0.796744	5.90049	0.000879443	0.00880147	aphi_vs_ctrl
9030619P08Rik	1.59422	-3.78758	0.135825	0.23588	aphi_vs_ctrl
9030622O22Rik	2.22508	-2.92067	0.0208833	0.07824	aphi_vs_ctrl
9030624G23Rik	-0.631102	1.53794	0.0324875	0.10802	aphi_vs_ctrl
9030624J02Rik	-0.246009	5.74534	0.0567989	0.164854	aphi_vs_ctrl
9030625G05Rik	0.145337	-0.0169084	0.337561	0.48102	aphi_vs_ctrl
9130001E16Rik	0.720764	-4.7585	0.10542	0.204832	aphi_vs_ctrl
9130008F23Rik	1.22458	-0.366789	0.000326462	0.00478437	aphi_vs_ctrl
9130011E15Rik	-0.66541	4.59848	0.00026136	0.00420278	aphi_vs_ctrl
9130015A21Rik	1.13118	-2.09343	0.0554478	0.161942	aphi_vs_ctrl
9130015L21Rik	-0.333247	-6.10601	0.113148	0.204832	aphi_vs_ctrl
9130019O22Rik	-0.568384	2.67126	0.00110503	0.0102429	aphi_vs_ctrl
9130019P16Rik	1.46983	-2.30002	0.0384581	0.122608	aphi_vs_ctrl
9130023H24Rik	-0.201483	2.58907	0.092252	0.204832	aphi_vs_ctrl
9130024F11Rik	-0.596806	-0.479639	0.131306	0.229828	aphi_vs_ctrl
9130204L05Rik	-1.26118	-0.320471	0.00126373	0.011113	aphi_vs_ctrl
9130208D14Rik	-1.31062	-4.25931	0.268268	0.402324	aphi_vs_ctrl
9130209A04Rik	0.50604	-2.50152	0.394408	0.540047	aphi_vs_ctrl
9130221F21Rik	0.372676	-0.697624	0.198084	0.317154	aphi_vs_ctrl
9130221H12Rik	-0.2475	2.25358	0.1515	0.256765	aphi_vs_ctrl
9130227L01Rik	0.613879	-1.25147	0.21157	0.333738	aphi_vs_ctrl
9130230L23Rik	2.61408	-2.86761	0.000519493	0.00638062	aphi_vs_ctrl
9130401M01Rik	-0.0406297	5.81135	0.818805	0.87204	aphi_vs_ctrl
9130409I23Rik	0.866498	-2.26914	0.0492315	0.147797	aphi_vs_ctrl
9130409J20Rik	-0.57885	-5.2387	0.464247	0.601086	aphi_vs_ctrl
9230009I02Rik	0.735608	-4.48113	0.110675	0.204832	aphi_vs_ctrl
9230019H11Rik	0.210291	-4.88188	0.679931	0.76861	aphi_vs_ctrl
9230020A06Rik	2.41982	-4.87633	0.00306639	0.019926	aphi_vs_ctrl
9230102K24Rik	-0.333247	-6.10601	0.113148	0.204832	aphi_vs_ctrl
9230102O04Rik	0.224206	-5.2259	0.778495	0.842405	aphi_vs_ctrl
9230104L09Rik	1.40158	-3.82719	0.111779	0.204832	aphi_vs_ctrl
9230105E05Rik	0.439702	-1.07796	0.218872	0.342863	aphi_vs_ctrl
9230110C19Rik	1.30901	2.45181	5.46985e-05	0.00190129	aphi_vs_ctrl
9230110F15Rik	-0.333247	-6.10601	0.113148	0.204832	aphi_vs_ctrl
9230112D13Rik	-0.0560405	-4.61649	0.913458	0.940207	aphi_vs_ctrl
9230112J17Rik	0.546004	-0.947804	0.129827	0.22787	aphi_vs_ctrl
9230113P08Rik	0.292837	-3.42438	0.601159	0.717672	aphi_vs_ctrl
9230114K14Rik	1.99815	4.18891	1.46952e-05	0.00120026	aphi_vs_ctrl
9230116L04Rik	0.9269	-3.19623	0.487868	0.61838	aphi_vs_ctrl
9230116N13Rik	0.357874	-0.0624411	0.112247	0.204832	aphi_vs_ctrl
9230117E06Rik	0.984112	-4.3516	0.358905	0.503735	aphi_vs_ctrl
9330020H09Rik	0.048714	1.86857	0.735294	0.81131	aphi_vs_ctrl
9330102E08Rik	0.300025	0.760638	0.415135	0.560722	aphi_vs_ctrl
9330104G04Rik	0.208065	-0.53439	0.731583	0.808197	aphi_vs_ctrl
9330111N05Rik	-0.332654	-5.93004	0.443148	0.581472	aphi_vs_ctrl
9330117O12Rik	-0.131651	-4.90723	0.883031	0.918138	aphi_vs_ctrl
9330133O14Rik	0.0921596	1.4098	0.54614	0.671402	aphi_vs_ctrl
9330136K24Rik	0.013078	0.790358	0.969517	0.978948	aphi_vs_ctrl
9330151L19Rik	0.449291	0.717726	0.0525643	0.155568	aphi_vs_ctrl
9330154J02Rik	-0.233916	-3.63363	0.666344	0.757722	aphi_vs_ctrl
9330155M09Rik	0.479589	1.43449	0.186892	0.303316	aphi_vs_ctrl
9330158H04Rik	0.192139	-0.11145	0.164743	0.274273	aphi_vs_ctrl
9330159F19Rik	-0.043609	1.37162	0.807097	0.863869	aphi_vs_ctrl
9330159M07Rik	0.00184968	1.27971	0.988546	0.992222	aphi_vs_ctrl
9330162012Rik	-0.236726	-3.52705	0.871259	0.909664	aphi_vs_ctrl
9330162B11Rik	-0.333247	-6.10601	0.113148	0.204832	aphi_vs_ctrl
9330175E14Rik	0.916514	-2.01362	0.0663467	0.185033	aphi_vs_ctrl
9330175M20Rik	0.726752	-4.23301	0.409452	0.554911	aphi_vs_ctrl
9330178D15Rik	-0.33328	-5.4132	0.252488	0.383997	aphi_vs_ctrl
9330179D12Rik	-0.175723	-4.57512	0.811572	0.86671	aphi_vs_ctrl
9330182L06Rik	1.76484	0.0848242	5.1576e-05	0.00185204	aphi_vs_ctrl
9330182O14Rik	3.64235	-3.99122	0.000276085	0.00434242	aphi_vs_ctrl
9330188P03Rik	1.8822	-4.54076	0.00526899	0.0289608	aphi_vs_ctrl
9330198I05Rik	0.594751	-0.300488	0.171594	0.283552	aphi_vs_ctrl
9330198N18Rik	1.0038	-2.60679	0.227179	0.353291	aphi_vs_ctrl
9330199G10Rik	0.668554	-5.22951	0.443209	0.581508	aphi_vs_ctrl
9430007A20Rik	-0.333247	-6.10601	0.113148	0.204832	aphi_vs_ctrl
9430014N10Rik	-0.333247	-6.10601	0.113148	0.204832	aphi_vs_ctrl
9430015G10Rik	-0.128381	5.17362	0.0489767	0.147227	aphi_vs_ctrl
9430018G01Rik	-0.193359	0.401224	0.399087	0.544969	aphi_vs_ctrl
9430019J16Rik	-0.333247	-6.10601	0.113148	0.204832	aphi_vs_ctrl
9430020K01Rik	-0.127691	3.6063	0.317299	0.458176	aphi_vs_ctrl
9430021M05Rik	0.11129	-3.99935	0.950672	0.965406	aphi_vs_ctrl
9430024E24Rik	0.610022	-0.812418	0.166909	0.277127	aphi_vs_ctrl
9430037G07Rik	-0.181202	2.23845	0.119615	0.213669	aphi_vs_ctrl
9430038I01Rik	-0.766115	2.68336	0.0250037	0.0891523	aphi_vs_ctrl
9430041J12Rik	-0.474456	-1.07159	0.371379	0.516562	aphi_vs_ctrl
9430060I03Rik	0.362529	-1.40292	0.396217	0.541867	aphi_vs_ctrl
9430065F17Rik	0.355344	-3.36253	0.665948	0.757602	aphi_vs_ctrl
9430069I07Rik	0.146704	-3.29366	0.716542	0.796528	aphi_vs_ctrl
9430078K24Rik	1.31976	-4.68538	0.287907	0.4244	aphi_vs_ctrl
9430083A17Rik	-0.52946	-0.209686	0.0802867	0.204832	aphi_vs_ctrl
9430085M18Rik	0.465373	0.593289	0.157406	0.264653	aphi_vs_ctrl
9430091E24Rik	-0.00712314	-0.044821	0.978566	0.985212	aphi_vs_ctrl
9430093N23Rik	0.192641	-5.93006	0.666107	0.757602	aphi_vs_ctrl
9430097D07Rik	1.12836	-2.12136	0.00363329	0.0222782	aphi_vs_ctrl
9530002B09Rik	-0.821106	-4.68005	0.376764	0.521695	aphi_vs_ctrl
9530003J23Rik	-0.749242	-4.52141	0.304636	0.444039	aphi_vs_ctrl
9530014B07Rik	0.193431	-5.75258	0.682619	0.770732	aphi_vs_ctrl
9530020I12Rik	0.187054	-1.30134	0.767124	0.834194	aphi_vs_ctrl
9530026F06Rik	-0.628476	-4.16184	0.691082	0.777159	aphi_vs_ctrl
9530026P05Rik	1.08043	-4.05058	0.352672	0.496818	aphi_vs_ctrl
9530027J09Rik	-0.38988	0.438179	0.17655	0.290129	aphi_vs_ctrl
9530034E10Rik	0.268793	0.287277	0.0754453	0.202117	aphi_vs_ctrl
9530036M11Rik	0.232042	0.367877	0.641487	0.74773	aphi_vs_ctrl
9530036O11Rik	0.510298	-4.41065	0.34125	0.48492	aphi_vs_ctrl
9530047P18Rik	-0.333247	-6.10601	0.113148	0.204832	aphi_vs_ctrl
9530051G07Rik	0.0637509	-1.34543	0.843924	0.889753	aphi_vs_ctrl
9530052C20Rik	1.02995	-0.0538276	0.0218766	0.0808476	aphi_vs_ctrl
9530052E02Rik	-0.196295	-4.02292	0.842172	0.888469	aphi_vs_ctrl
9530053A07Rik	2.42144	5.01325	8.54395e-07	0.000833892	aphi_vs_ctrl
9530057J20Rik	2.02303	0.296293	0.0154141	0.0629032	aphi_vs_ctrl
9530059O14Rik	-1.18435	-3.13439	0.240964	0.37038	aphi_vs_ctrl
9530062K07Rik	0.336107	-0.20006	0.145767	0.249347	aphi_vs_ctrl
9530068E07Rik	-0.106498	4.69954	0.0703133	0.191806	aphi_vs_ctrl
9530077C05Rik	1.16159	2.64771	0.000514743	0.00634335	aphi_vs_ctrl
9530080O11Rik	-0.781396	-3.66735	0.202742	0.322811	aphi_vs_ctrl
9530082P21Rik	0.267421	0.642247	0.437084	0.580058	aphi_vs_ctrl
9530091C08Rik	-0.313378	0.428119	0.318985	0.460022	aphi_vs_ctrl
9630001P10Rik	-1.20222	-2.93857	0.0217419	0.0805636	aphi_vs_ctrl
9630002D21Rik	-1.04597	-4.19303	0.380382	0.525678	aphi_vs_ctrl
9630013A20Rik	-0.333219	-5.84756	0.570041	0.69234	aphi_vs_ctrl
9630013D21Rik	0.490792	-3.71676	0.248468	0.379319	aphi_vs_ctrl
9630013K17Rik	1.23194	-1.76035	0.171727	0.283695	aphi_vs_ctrl
9630015K15Rik	-0.32671	-4.6443	0.737461	0.812907	aphi_vs_ctrl
9630028B13Rik	0.438187	0.288947	0.0837935	0.204832	aphi_vs_ctrl
9630028H03Rik	0.188695	-5.22633	0.811785	0.86681	aphi_vs_ctrl
9630028I04Rik	0.206401	-0.487007	0.482343	0.613988	aphi_vs_ctrl
9830107B12Rik	-0.0464568	-1.62361	0.929439	0.950818	aphi_vs_ctrl
9830132P13Rik	-0.199579	-2.25155	0.737462	0.812907	aphi_vs_ctrl
9830147E19Rik	0.125428	6.03692	0.352808	0.496894	aphi_vs_ctrl
9830166K06Rik	-0.4777	-1.9302	0.385679	0.531111	aphi_vs_ctrl
9930012K11Rik	0.073192	2.20968	0.695833	0.781238	aphi_vs_ctrl
9930014A18Rik	-3.07361	-2.81156	0.000946109	0.00925622	aphi_vs_ctrl
9930021J03Rik	-0.07764	5.33931	0.32679	0.468627	aphi_vs_ctrl
9930038B18Rik	2.23522	-1.90294	0.00209492	0.0154888	aphi_vs_ctrl
9930104L06Rik	0.490352	4.72811	0.00118854	0.0107122	aphi_vs_ctrl
9930111H07Rik	1.04019	-2.01612	0.0448838	0.137642	aphi_vs_ctrl
9930111J21Rik1	-0.0556846	0.857708	0.822896	0.875136	aphi_vs_ctrl
9930111J21Rik2	-0.333594	-5.74767	0.467889	0.604655	aphi_vs_ctrl
a	0.280254	1.44592	0.0424517	0.132042	aphi_vs_ctrl
A030001D20Rik	-0.0449854	-0.198113	0.866645	0.906311	aphi_vs_ctrl
A130010J15Rik	-0.000396086	3.78787	0.996596	0.997681	aphi_vs_ctrl
A130030D18Rik	-0.333247	-6.10601	0.113148	0.204832	aphi_vs_ctrl
A130051J06Rik	0.809933	0.292022	0.05568	0.162478	aphi_vs_ctrl
A130077B15Rik	0.122344	4.8345	0.554514	0.678947	aphi_vs_ctrl
A1bg	-0.333247	-6.10601	0.113148	0.204832	aphi_vs_ctrl
A1cf	-0.287045	-4.80374	0.776777	0.841275	aphi_vs_ctrl
A230001M10Rik	1.39759	-2.1823	0.134847	0.234547	aphi_vs_ctrl
A230006K03Rik	0.173648	-1.70435	0.561028	0.684956	aphi_vs_ctrl
A230009B12Rik	1.14591	-2.41867	0.103263	0.204832	aphi_vs_ctrl
A230020J21Rik	-0.0317768	-2.53725	0.933009	0.953053	aphi_vs_ctrl
A230028O05Rik	0.433831	0.103253	0.123652	0.219277	aphi_vs_ctrl
A230046K03Rik	-0.184876	7.27301	0.0141281	0.0591231	aphi_vs_ctrl
A230050P20Rik	-0.539888	3.14124	0.00408563	0.0241973	aphi_vs_ctrl
A230051N06Rik	1.66556	-3.66639	0.0867857	0.204832	aphi_vs_ctrl
A230052G05Rik	0.258348	-3.29414	0.691072	0.777159	aphi_vs_ctrl
A230056J06Rik	-0.0168236	-0.501205	0.929277	0.950699	aphi_vs_ctrl
A230056P14Rik	0.298202	-0.474869	0.523735	0.651387	aphi_vs_ctrl
A230057D06Rik	0.585876	-0.820077	0.230202	0.35701	aphi_vs_ctrl
A230065H16Rik	1.45315	-4.74286	0.126989	0.224107	aphi_vs_ctrl
A230070E04Rik	-1.05115	0.220692	5.88317e-05	0.00194683	aphi_vs_ctrl
A230072C01Rik	-0.0274124	1.83426	0.918404	0.943444	aphi_vs_ctrl
A230072E10Rik	0.455202	0.255103	0.0676917	0.186469	aphi_vs_ctrl
A230072I06Rik	1.07025	-4.87968	0.162397	0.271137	aphi_vs_ctrl
A230077H06Rik	-0.755423	-1.33991	0.0228546	0.0836498	aphi_vs_ctrl
A230083G16Rik	-0.0903048	-0.969658	0.859305	0.901189	aphi_vs_ctrl
A230087F16Rik	0.516362	-0.373599	0.198234	0.317352	aphi_vs_ctrl
A230098N10Rik	-0.740796	-1.06487	0.261891	0.394977	aphi_vs_ctrl
A230103J11Rik	-0.149534	1.04453	0.611243	0.725568	aphi_vs_ctrl
A230103O09Rik	1.26426	-3.53046	0.0786361	0.204832	aphi_vs_ctrl
A230107N01Rik	0.477987	-3.04179	0.687984	0.774903	aphi_vs_ctrl
A230108P19Rik	-2.55486	-4.1447	0.0237277	0.0858481	aphi_vs_ctrl
A2m	-1.23136	4.54132	0.000815315	0.008418	aphi_vs_ctrl
A330008L17Rik	-0.584233	-5.49617	0.550131	0.675223	aphi_vs_ctrl
A330009N23Rik	0.438688	0.245023	0.161227	0.269749	aphi_vs_ctrl
A330015K06Rik	-0.577696	-5.49673	0.488302	0.618656	aphi_vs_ctrl
A330023F24Rik	0.167841	-1.69781	0.409782	0.555213	aphi_vs_ctrl
A330032B11Rik	0.326086	-0.359132	0.452636	0.590983	aphi_vs_ctrl
A330033J07Rik	-0.0506506	-3.82465	0.97001	0.979352	aphi_vs_ctrl
A330035P11Rik	-0.450022	1.05336	0.0835843	0.204832	aphi_vs_ctrl
A330040F15Rik	1.56834	-3.10623	0.0648744	0.181909	aphi_vs_ctrl
A330041J22Rik	0.325732	-2.25437	0.7001	0.784445	aphi_vs_ctrl
A330048O09Rik	-0.856659	-2.05938	0.0211679	0.0790121	aphi_vs_ctrl
A330049N07Rik	0.0460165	1.25843	0.877792	0.914188	aphi_vs_ctrl
A330069E16Rik	0.327378	1.07268	0.24952	0.380493	aphi_vs_ctrl
A330069K06Rik	-0.333247	-6.10601	0.113148	0.204832	aphi_vs_ctrl
A330070K13Rik	-0.333247	-6.10601	0.113148	0.204832	aphi_vs_ctrl
A330074K22Rik	2.15877	-4.47914	0.00754208	0.0375606	aphi_vs_ctrl
A330076C08Rik	0.505665	-3.39428	0.709203	0.791394	aphi_vs_ctrl
A330076H08Rik	-0.333219	-5.84756	0.570043	0.69234	aphi_vs_ctrl
A330093E20Rik	-2.05415	-3.60085	0.0272622	0.0951047	aphi_vs_ctrl
A330102I10Rik	0.660502	-0.0406674	0.0650437	0.182299	aphi_vs_ctrl
A3galt2	3.92117	-2.97098	0.000485287	0.00610941	aphi_vs_ctrl
A430005L14Rik	-0.785967	4.8451	0.0021829	0.0158734	aphi_vs_ctrl
A430010J10Rik	-0.25637	-2.5778	0.718714	0.798181	aphi_vs_ctrl
A430033K04Rik	0.133383	3.35798	0.323678	0.465102	aphi_vs_ctrl
A430035B10Rik	1.48215	-3.31501	0.061526	0.175058	aphi_vs_ctrl
A430046D13Rik	0.113079	1.20036	0.505165	0.634574	aphi_vs_ctrl
A430048G15Rik	-0.0698259	-5.36152	0.945867	0.962255	aphi_vs_ctrl
A430057M04Rik	-0.581266	1.25715	0.0609181	0.173752	aphi_vs_ctrl
A430060F13Rik	4.3081	-3.62385	1.28711e-05	0.00115475	aphi_vs_ctrl
A430072P03Rik	-0.332654	-5.93004	0.443148	0.581472	aphi_vs_ctrl
A430078G23Rik	-0.0583191	1.07838	0.770287	0.836175	aphi_vs_ctrl
A430078I02Rik	-0.0323059	0.299601	0.894371	0.926261	aphi_vs_ctrl
A430085M09Rik	0.673583	0.792438	0.126535	0.22348	aphi_vs_ctrl
A430088P11Rik	0.898561	-0.918663	0.0267015	0.0936911	aphi_vs_ctrl
A430089I19Rik	3.21645	-4.0335	0.0161069	0.0648021	aphi_vs_ctrl
A430090L17Rik	0.0567201	-1.10204	0.902739	0.932424	aphi_vs_ctrl
A430093F15Rik	0.835739	-4.35387	0.250069	0.381055	aphi_vs_ctrl
A430105I19Rik	2.51213	1.35416	0.000240435	0.00399738	aphi_vs_ctrl
A430105J06Rik	0.645896	0.106554	0.0370571	0.119139	aphi_vs_ctrl
A430108G06Rik	0.459419	-1.32748	0.275174	0.409984	aphi_vs_ctrl
A430110L20Rik	0.0524257	2.09089	0.771207	0.836864	aphi_vs_ctrl
A4galt	0.0439449	5.51081	0.826969	0.877969	aphi_vs_ctrl
A4gnt	-0.333218	-5.92952	0.429973	0.573062	aphi_vs_ctrl
A530001N23Rik	1.19262	-0.628505	0.0545062	0.159837	aphi_vs_ctrl
A530006G24Rik	-0.333247	-6.10601	0.113148	0.204832	aphi_vs_ctrl
A530010L16Rik	1.20674	-4.11784	0.254044	0.385829	aphi_vs_ctrl
A530013C23Rik	2.47334	-2.79017	0.00361596	0.022216	aphi_vs_ctrl
A530016L24Rik	0.852856	-5.36149	0.359873	0.504622	aphi_vs_ctrl
A530020G20Rik	1.20183	-1.62788	0.0655546	0.183404	aphi_vs_ctrl
A530021J07Rik	-1.10867	-4.85324	0.323845	0.465269	aphi_vs_ctrl
A530032D15Rik	1.38388	-4.2212	0.140444	0.242167	aphi_vs_ctrl
A530040E14Rik	0.184593	-3.63949	0.862656	0.903553	aphi_vs_ctrl
A530046M15Rik	0.441543	-5.84732	0.479857	0.613627	aphi_vs_ctrl
A530050N04Rik	-0.204919	-1.01298	0.634745	0.743943	aphi_vs_ctrl
A530053G22Rik	0.194724	-5.75335	0.762919	0.831546	aphi_vs_ctrl
A530058N18Rik	-0.333247	-6.10601	0.113148	0.204832	aphi_vs_ctrl
A530064D06Rik	-0.375495	-1.33782	0.205926	0.326615	aphi_vs_ctrl
A530065N20Rik	0.218356	-5.04051	0.828734	0.879249	aphi_vs_ctrl
A530072M11Rik	1.97011	-0.79738	0.00647818	0.0336418	aphi_vs_ctrl
A530088E08Rik	-0.0161758	-3.9866	0.974545	0.982429	aphi_vs_ctrl
A530095I07Rik	-0.333375	-5.53547	0.635192	0.744251	aphi_vs_ctrl
A530099J19Rik	-1.18146	-2.80575	0.436976	0.579978	aphi_vs_ctrl
A630001G21Rik	2.19571	-1.06798	0.000142932	0.00299519	aphi_vs_ctrl
A630001O12Rik	1.92125	-1.06151	0.028613	0.0984965	aphi_vs_ctrl
A630010A05Rik	-0.14222	-1.37958	0.646694	0.747842	aphi_vs_ctrl
A630012P03Rik	0.321452	-4.26178	0.705451	0.788487	aphi_vs_ctrl
A630019I02Rik	0.315876	-1.53882	0.209849	0.331515	aphi_vs_ctrl
A630020A06	-0.436156	0.86467	0.178658	0.29283	aphi_vs_ctrl
A630023A22Rik	-0.332863	-5.75355	0.419788	0.564793	aphi_vs_ctrl
A630023P12Rik	0.72394	-4.88441	0.502165	0.631551	aphi_vs_ctrl
A630033H20Rik	-0.00826847	-3.04741	0.995063	0.996772	aphi_vs_ctrl
A630034I12Rik	-0.346265	3.25357	0.0215831	0.0801313	aphi_vs_ctrl
A630050E04Rik	-0.333247	-6.10601	0.113148	0.204832	aphi_vs_ctrl
A630066F11Rik	-0.218068	-0.0376221	0.20785	0.328902	aphi_vs_ctrl
A630072L19Rik	-0.026914	0.745081	0.87602	0.913057	aphi_vs_ctrl
A630072M18Rik	0.278519	2.72172	0.0172443	0.0679496	aphi_vs_ctrl
A630073D07Rik	-0.333247	-6.10601	0.113148	0.204832	aphi_vs_ctrl
A630075F10Rik	0.141387	0.216067	0.582034	0.701905	aphi_vs_ctrl
A630076J17Rik	-0.333247	-6.10601	0.113148	0.204832	aphi_vs_ctrl
A630077J23Rik	0.231034	-3.34889	0.44947	0.58791	aphi_vs_ctrl
A630089N07Rik	-0.0163662	8.3236	0.949301	0.964393	aphi_vs_ctrl
A630095E13Rik	-0.333247	-6.10601	0.113148	0.204832	aphi_vs_ctrl
A630095N17Rik	1.20374	0.211769	0.000132741	0.00288528	aphi_vs_ctrl
A730004F24Rik	-1.35535	-5.04791	0.333779	0.476851	aphi_vs_ctrl
A730006G06Rik	1.44616	-3.05395	0.090225	0.204832	aphi_vs_ctrl
A730008H23Rik	-0.369575	4.6018	0.0159547	0.064448	aphi_vs_ctrl
A730009L09Rik	0.457961	-2.27943	0.308434	0.448436	aphi_vs_ctrl
A730013G03Rik	0.360004	-0.963178	0.327734	0.469644	aphi_vs_ctrl
A730017C20Rik	-0.861111	-4.77886	0.271881	0.406181	aphi_vs_ctrl
A730017L22Rik	0.202562	3.17409	0.402904	0.548607	aphi_vs_ctrl
A730018C14Rik	-0.855244	-5.75515	0.0978185	0.204832	aphi_vs_ctrl
A730020E08Rik	1.01091	-1.81901	0.119669	0.213733	aphi_vs_ctrl
A730020M07Rik	0.991048	-3.52091	0.316137	0.456954	aphi_vs_ctrl
A730036I17Rik	0.399297	2.77551	0.0185179	0.0715074	aphi_vs_ctrl
A730043L09Rik	0.631246	-1.64594	0.295649	0.433612	aphi_vs_ctrl
A730046J19Rik	0.24281	0.471966	0.630113	0.740386	aphi_vs_ctrl
A730049H05Rik	1.14339	4.11809	0.00336695	0.0211569	aphi_vs_ctrl
A730056A06Rik	-0.180411	-5.09549	0.854266	0.897447	aphi_vs_ctrl
A730082K24Rik	0.577193	1.55887	0.130147	0.228254	aphi_vs_ctrl
A730085K08Rik	0.966186	-4.545	0.421741	0.566432	aphi_vs_ctrl
A730089K16Rik	0.152249	-0.639375	0.606116	0.720949	aphi_vs_ctrl
A730090N16Rik	-0.106304	-1.83963	0.830272	0.880286	aphi_vs_ctrl
A830005F24Rik	0.957603	-1.86296	0.0587755	0.169051	aphi_vs_ctrl
A830009L08Rik	-1.10225	-4.6286	0.20007	0.319485	aphi_vs_ctrl
A830010M20Rik	-0.314329	2.90249	0.0420331	0.131143	aphi_vs_ctrl
A830011K09Rik	-0.500526	-5.63119	0.555572	0.680016	aphi_vs_ctrl
A830012C17Rik	-0.332753	-5.40172	0.628508	0.739105	aphi_vs_ctrl
A830018L16Rik	0.389774	2.66326	0.0467376	0.141948	aphi_vs_ctrl
A830019L24Rik	-0.333247	-6.10601	0.113148	0.204832	aphi_vs_ctrl
A830019P07Rik	0.593295	-5.35571	0.514236	0.642556	aphi_vs_ctrl
A830021F12Rik	0.195633	-5.1432	0.765554	0.833073	aphi_vs_ctrl
A830021M18Rik	-0.217391	-0.859505	0.43406	0.577167	aphi_vs_ctrl
A830029E22Rik	-0.332654	-5.93004	0.443148	0.581472	aphi_vs_ctrl
A830035A12Rik	-0.407539	-2.19391	0.351218	0.49529	aphi_vs_ctrl
A830035O19Rik	1.56166	0.182075	0.00208451	0.0154434	aphi_vs_ctrl
A830052D11Rik	0.957544	-1.88085	0.215946	0.339246	aphi_vs_ctrl
A830080D01Rik	-0.0950094	5.38415	0.561978	0.685722	aphi_vs_ctrl
A830082K12Rik	-0.0446837	-0.61772	0.904648	0.933956	aphi_vs_ctrl
A830082N09Rik	-0.434268	1.98319	0.0808444	0.204832	aphi_vs_ctrl
A830092H15Rik	-0.34703	-3.69942	0.80698	0.863787	aphi_vs_ctrl
A930001A20Rik	0.874374	-3.42359	0.393357	0.539016	aphi_vs_ctrl
A930001C03Rik	2.02539	-0.151639	0.0252879	0.0899171	aphi_vs_ctrl
A930002C04Rik	1.00068	-2.98487	0.10306	0.204832	aphi_vs_ctrl
A930003A15Rik	0.194252	-5.92932	0.661531	0.756942	aphi_vs_ctrl
A930003O13Rik	1.49172	-3.69617	0.0630002	0.178062	aphi_vs_ctrl
A930004D18Rik	-0.531421	2.2828	0.018571	0.0716474	aphi_vs_ctrl
A930005H10Rik	0.297588	2.44392	0.142184	0.244493	aphi_vs_ctrl
A930006I01Rik	0.195297	-5.44015	0.789827	0.851128	aphi_vs_ctrl
A930006K02Rik	2.0342	-2.03868	0.000104823	0.00256866	aphi_vs_ctrl
A930007A09Rik	0.504532	4.47953	0.00651354	0.0337713	aphi_vs_ctrl
A930007I19Rik	0.374434	-0.633598	0.424748	0.569686	aphi_vs_ctrl
A930009A15Rik	-0.332654	-5.93004	0.443148	0.581472	aphi_vs_ctrl
A930011G23Rik	-0.85349	-4.991	0.420389	0.565243	aphi_vs_ctrl
A930012L18Rik	0.257049	-1.6275	0.526134	0.653287	aphi_vs_ctrl
[truncated: 70,340 more rows]
