# Supplementary material for: ATR expands embryonic stem cell fate potential in response to replication stress
Source: eLife. 2020 Mar 12;9:e54756. doi: 10.7554/eLife.54756 (PMC7067586; doi:10.7554/eLife.54756)
Supplement: Supplementary file 4. [file elife-54756-supp4.xlsx]

## Sheet: Sheet1
Supplementary Table 4. Comparison of DEGs expressed in APH induced cells with published datasets.
gene	log2_fc_aphi_vs_ctrl	log2_vs_aphi_atri_vs_ctrl	log2fc_akiyama_zscan4	log2fc_eckersley_zscan4	log2fc_choi_mir34	log2fc_ishiuchi_p60	log2fc_ishiuchi_p150	log2fc_rowe_trim28	log2fc_hendrickson_dux
0610005C13Rik	NA	NA	NA	3.02	1.47	2.33	2.7	NA	NA
0610006L08Rik	NA	NA	NA	NA	NA	NA	NA	NA	NA
0610007P14Rik	NA	NA	NA	NA	NA	NA	NA	NA	NA
0610009B22Rik	NA	NA	NA	NA	NA	NA	NA	NA	NA
0610009E02Rik	NA	NA	NA	NA	NA	NA	NA	NA	NA
0610009L18Rik	NA	NA	NA	NA	NA	NA	NA	NA	NA
0610009O20Rik	NA	NA	NA	NA	NA	NA	NA	NA	NA
0610010B08Rik	NA	NA	NA	NA	NA	NA	NA	NA	NA
0610010F05Rik	NA	NA	NA	NA	NA	NA	NA	NA	NA
0610010K14Rik	-1.22	NA	NA	NA	NA	NA	NA	NA	NA
0610012G03Rik	NA	NA	NA	NA	NA	NA	NA	NA	NA
0610025J13Rik	1.65	NA	NA	NA	NA	NA	NA	NA	NA
0610030E20Rik	NA	1.15	NA	NA	NA	NA	NA	NA	NA
0610031O16Rik	NA	NA	NA	NA	NA	NA	3.15	NA	NA
0610037L13Rik	NA	NA	NA	NA	NA	NA	NA	NA	NA
0610038B21Rik	NA	NA	NA	NA	NA	NA	NA	NA	NA
0610039H22Rik	NA	NA	NA	NA	NA	NA	NA	NA	NA
0610039K10Rik	NA	NA	NA	NA	NA	NA	1.82	NA	NA
0610040B10Rik	NA	1.08	NA	NA	NA	NA	NA	NA	NA
0610040F04Rik	NA	NA	NA	NA	NA	NA	NA	NA	NA
0610040J01Rik	2.11	1.38	NA	3.68	3.23	3.93	4.37	NA	2.98
0610043K17Rik	NA	NA	NA	NA	NA	NA	NA	NA	NA
1010001N08Rik	NA	2.4	NA	NA	NA	-2.47	-2.65	NA	NA
1100001I12Rik	NA	NA	NA	NA	NA	NA	NA	NA	NA
1110002J07Rik	NA	NA	NA	1.62	NA	NA	1.74	NA	NA
1110002L01Rik	NA	NA	NA	NA	NA	NA	NA	NA	NA
1110002O04Rik	NA	NA	NA	NA	NA	NA	NA	NA	NA
1110004E09Rik	NA	NA	NA	NA	NA	NA	NA	NA	NA
1110004F10Rik	NA	NA	NA	NA	NA	NA	NA	NA	NA
1110006O24Rik	NA	NA	NA	NA	NA	NA	NA	NA	NA
1110008F13Rik	NA	NA	NA	NA	NA	NA	NA	NA	NA
1110008L16Rik	NA	NA	NA	NA	NA	NA	NA	NA	NA
1110008P14Rik	NA	NA	NA	NA	NA	NA	NA	NA	NA
1110012L19Rik	NA	NA	NA	NA	NA	NA	NA	NA	NA
1110015O18Rik	NA	NA	NA	NA	NA	NA	NA	NA	NA
1110017D15Rik	2.71	2.2	NA	NA	NA	2.95	2.72	NA	NA
1110018N20Rik	NA	NA	NA	NA	NA	2.23	2.6	NA	NA
1110019D14Rik	1.11	1.06	NA	NA	NA	NA	NA	NA	NA
1110020A21Rik	NA	NA	NA	NA	NA	NA	NA	NA	NA
1110025L11Rik	NA	NA	NA	NA	NA	NA	NA	NA	NA
1110028F11Rik	3.57	2.94	NA	NA	NA	NA	NA	NA	NA
1110028F18Rik	1.74	2.13	NA	NA	NA	2.06	NA	NA	NA
1110032A03Rik	NA	1.32	NA	NA	NA	NA	NA	NA	NA
1110032F04Rik	NA	NA	NA	2.34	1.49	NA	NA	NA	NA
1110034G24Rik	NA	NA	NA	NA	NA	NA	NA	NA	NA
1110036E04Rik	NA	NA	NA	NA	NA	NA	NA	NA	NA
1110037F02Rik	NA	NA	NA	NA	NA	NA	NA	NA	NA
1110038B12Rik	NA	NA	NA	NA	NA	NA	NA	NA	NA
1110038F14Rik	NA	NA	NA	NA	NA	NA	NA	NA	NA
1110046J04Rik	NA	NA	NA	NA	NA	NA	1.49	NA	NA
1110051M20Rik	NA	NA	NA	NA	NA	NA	NA	NA	NA
1110057P08Rik	NA	NA	NA	NA	NA	NA	NA	NA	NA
1110058D11Rik	NA	NA	NA	NA	NA	NA	NA	NA	NA
1110059E24Rik	NA	NA	NA	NA	NA	NA	NA	NA	NA
1110059G10Rik	NA	NA	NA	NA	NA	NA	NA	NA	NA
1110065P20Rik	NA	NA	NA	NA	NA	NA	NA	NA	NA
1190002N15Rik	NA	-1.28	NA	NA	NA	NA	NA	NA	NA
1190003K10Rik	NA	NA	NA	NA	NA	NA	NA	NA	NA
1190005I06Rik	1.21	NA	NA	NA	NA	NA	NA	-1.77	NA
1190007I07Rik	NA	NA	NA	NA	NA	NA	NA	NA	NA
1190028D05Rik	NA	NA	NA	NA	NA	NA	1.02	NA	NA
1300002E11Rik	NA	NA	NA	NA	NA	NA	NA	NA	NA
1300017J02Rik	2.28	2.43	NA	NA	1.92	1.95	1.65	NA	NA
140Imeg	NA	NA	NA	NA	NA	NA	NA	NA	NA
1500002F19Rik	NA	NA	NA	NA	NA	NA	NA	NA	NA
1500004A13Rik	NA	NA	NA	NA	NA	NA	NA	NA	NA
1500009C09Rik	NA	NA	NA	NA	NA	1.47	1.39	NA	NA
1500009L16Rik	NA	1.03	NA	NA	NA	NA	NA	1.59	NA
1500011B03Rik	NA	NA	NA	NA	NA	NA	NA	NA	NA
1500011K16Rik	NA	NA	NA	NA	NA	-1.05	-1.06	NA	NA
1500012K07Rik	NA	NA	NA	NA	NA	NA	NA	NA	NA
1500015A07Rik	NA	NA	NA	NA	NA	NA	NA	NA	NA
1500015L24Rik	NA	NA	NA	NA	NA	NA	NA	NA	NA
1500015O10Rik	NA	NA	NA	NA	NA	NA	NA	NA	NA
1500017E21Rik	NA	NA	NA	NA	NA	NA	NA	NA	NA
1500026H17Rik	NA	NA	5.47	5.28	3.87	4.13	5.03	NA	3.36
1500035N22Rik	NA	NA	NA	NA	NA	NA	NA	NA	NA
1520401A03Rik	NA	NA	NA	NA	NA	NA	NA	NA	NA
1600002D24Rik	3.46	4.69	NA	NA	NA	NA	NA	NA	NA
1600002H07Rik	NA	NA	NA	NA	NA	NA	NA	NA	NA
1600002K03Rik	NA	NA	NA	NA	NA	NA	NA	NA	NA
1600010M07Rik	2.41	1.4	NA	NA	NA	NA	NA	NA	NA
1600012H06Rik	NA	NA	NA	NA	NA	NA	NA	NA	NA
1600014C10Rik	NA	NA	NA	NA	NA	NA	NA	1.15	NA
1600014C23Rik	-1.61	-2.63	NA	NA	NA	NA	NA	NA	NA
1600015I10Rik	NA	NA	NA	2.2	NA	3.43	4.32	NA	NA
1600019K03Rik	NA	NA	NA	NA	NA	NA	NA	NA	NA
1600020E01Rik	NA	NA	NA	NA	NA	NA	NA	NA	NA
1600023N17Rik	NA	NA	NA	NA	NA	NA	NA	NA	NA
1600025M17Rik	NA	NA	NA	NA	NA	NA	NA	NA	NA
1600027J07Rik	NA	NA	NA	NA	NA	NA	NA	NA	NA
1600029I14Rik	NA	NA	NA	NA	NA	NA	NA	NA	NA
1600029O15Rik	NA	NA	NA	NA	NA	1.35	1.93	NA	NA
1700001C02Rik	NA	NA	NA	NA	NA	NA	NA	NA	NA
1700001C19Rik	NA	NA	NA	NA	NA	1.4	1.35	NA	NA
1700001D01Rik	NA	NA	NA	NA	NA	NA	NA	NA	NA
1700001F09Rik	NA	NA	NA	NA	NA	NA	4.16	NA	NA
1700001G01Rik	NA	NA	NA	NA	NA	NA	NA	NA	NA
1700001G11Rik	NA	1.36	NA	NA	NA	NA	NA	NA	NA
1700001G17Rik	1.66	1.71	NA	NA	NA	NA	NA	NA	NA
1700001J03Rik	NA	NA	NA	NA	NA	NA	NA	NA	NA
1700001J11Rik	NA	NA	NA	NA	NA	NA	NA	NA	NA
1700001K19Rik	NA	NA	NA	NA	NA	NA	NA	NA	NA
1700001K23Rik	NA	NA	NA	NA	NA	NA	NA	NA	NA
1700001L05Rik	NA	NA	NA	NA	NA	NA	NA	NA	NA
1700001L19Rik	NA	NA	NA	NA	NA	NA	NA	NA	NA
1700001O22Rik	NA	NA	NA	NA	NA	NA	NA	NA	NA
1700001P01Rik	1.91	1.4	NA	NA	NA	NA	NA	NA	NA
1700003C15Rik	NA	NA	NA	NA	NA	NA	NA	NA	NA
1700003D09Rik	NA	3.68	NA	NA	NA	NA	NA	NA	NA
1700003E16Rik	2.09	1.54	NA	NA	NA	NA	NA	NA	NA
1700003E24Rik	NA	NA	NA	NA	NA	NA	4.46	NA	NA
1700003F12Rik	NA	NA	NA	NA	NA	NA	NA	NA	NA
1700003G13Rik	3.11	2.65	NA	NA	NA	NA	NA	NA	NA
1700003G18Rik	NA	NA	NA	NA	NA	NA	NA	NA	NA
1700003H04Rik	NA	NA	NA	NA	NA	NA	NA	NA	NA
1700003I22Rik	NA	NA	NA	NA	NA	NA	NA	NA	NA
1700003L19Rik	NA	NA	NA	NA	NA	NA	NA	NA	NA
1700003M07Rik	1.76	2.49	NA	NA	NA	NA	NA	NA	NA
1700003P14Rik	NA	NA	NA	NA	NA	NA	NA	NA	NA
1700006A11Rik	NA	NA	NA	NA	NA	NA	NA	NA	NA
1700006E09Rik	NA	NA	NA	NA	NA	NA	NA	NA	NA
1700006F04Rik	NA	NA	NA	NA	NA	NA	NA	NA	NA
1700006H20Rik	NA	NA	NA	NA	NA	NA	NA	NA	NA
1700006H21Rik	NA	NA	NA	NA	NA	NA	NA	NA	NA
1700007B14Rik	NA	NA	NA	NA	NA	NA	NA	NA	NA
1700007E05Rik	NA	NA	NA	NA	NA	NA	NA	NA	NA
1700007F19Rik	NA	NA	NA	NA	NA	NA	NA	NA	NA
1700007G11Rik	NA	NA	NA	NA	NA	NA	NA	NA	NA
1700007J10Rik	NA	NA	NA	NA	NA	1.99	2.18	NA	NA
1700007K09Rik	NA	NA	NA	NA	NA	NA	NA	NA	NA
1700007K13Rik	2.04	2.49	NA	NA	NA	NA	NA	1.75	NA
1700007L15Rik	NA	NA	NA	NA	NA	NA	NA	NA	NA
1700007P06Rik	NA	NA	NA	NA	NA	NA	NA	NA	NA
1700008C04Rik	NA	NA	NA	NA	NA	NA	NA	NA	NA
1700008J07Rik	-1.1	NA	NA	NA	NA	NA	NA	NA	NA
1700008K24Rik	NA	NA	NA	NA	NA	NA	NA	NA	NA
1700008O03Rik	NA	NA	NA	NA	NA	NA	NA	NA	NA
1700008P02Rik	NA	NA	NA	NA	NA	NA	NA	NA	NA
1700009C05Rik	NA	NA	NA	NA	NA	NA	NA	NA	NA
1700009J07Rik	NA	NA	NA	NA	NA	NA	NA	NA	NA
1700009N14Rik	NA	NA	NA	NA	NA	NA	NA	NA	NA
1700010B08Rik	NA	NA	NA	NA	NA	2.87	NA	NA	NA
1700010D01Rik	NA	NA	NA	NA	NA	NA	NA	NA	NA
1700010I02Rik	-1.15	NA	NA	NA	NA	NA	NA	NA	NA
1700010I14Rik	NA	1.16	NA	NA	NA	NA	NA	NA	NA
1700010J16Rik	NA	NA	NA	NA	NA	NA	NA	NA	NA
1700010K23Rik	NA	NA	NA	NA	NA	NA	NA	NA	NA
1700010L04Rik	NA	2.17	NA	NA	NA	NA	NA	NA	NA
1700010N08Rik	-1.12	NA	NA	2.76	NA	3.08	3.77	NA	2.05
1700011B04Rik	NA	NA	NA	NA	NA	NA	NA	NA	NA
1700011C11Rik	NA	NA	NA	NA	NA	NA	NA	NA	NA
1700011E24Rik	NA	NA	NA	NA	NA	NA	3.06	NA	NA
1700011H14Rik	NA	NA	NA	NA	NA	2.12	NA	NA	NA
1700011I03Rik	NA	NA	NA	NA	NA	NA	NA	NA	NA
1700011L22Rik	NA	NA	NA	NA	NA	NA	NA	NA	NA
1700011M02Rik	NA	NA	NA	NA	NA	NA	NA	NA	NA
1700012A03Rik	NA	NA	NA	NA	NA	NA	NA	NA	NA
1700012B07Rik	NA	NA	NA	NA	NA	NA	2.39	NA	NA
1700012B09Rik	NA	1.46	NA	NA	NA	NA	NA	NA	NA
1700012C14Rik	1.01	NA	NA	NA	NA	NA	NA	NA	NA
1700012D01Rik	NA	NA	NA	NA	NA	NA	NA	NA	NA
1700012D14Rik	NA	NA	NA	NA	NA	NA	NA	NA	NA
1700012D16Rik	NA	NA	NA	NA	NA	NA	NA	NA	NA
1700012H19Rik	NA	NA	NA	NA	NA	NA	NA	NA	NA
1700012I11Rik	NA	NA	NA	NA	NA	NA	NA	NA	NA
1700012J15Rik	NA	NA	NA	NA	5.74	NA	NA	NA	NA
1700012P22Rik	NA	NA	NA	NA	NA	NA	NA	NA	NA
1700013D24Rik	NA	NA	NA	NA	NA	NA	NA	NA	NA
1700013F07Rik	NA	2.96	NA	NA	NA	NA	NA	-2.48	NA
1700013G24Rik	3.35	3.83	NA	NA	2.3	NA	NA	NA	NA
1700013H16Rik	NA	NA	NA	4.63	3.1	1.65	2.32	NA	NA
1700013N06Rik	NA	NA	NA	NA	NA	NA	NA	NA	NA
1700015C15Rik	NA	NA	NA	NA	NA	NA	NA	NA	NA
1700015E13Rik	NA	NA	NA	NA	NA	NA	NA	NA	NA
1700015F17Rik	NA	NA	NA	NA	NA	NA	NA	NA	NA
1700015G11Rik	NA	NA	NA	NA	NA	NA	NA	NA	NA
1700016A09Rik	NA	NA	NA	NA	NA	NA	NA	-1.95	NA
1700016B01Rik	NA	NA	NA	NA	NA	NA	NA	NA	NA
1700016C15Rik	NA	NA	NA	NA	NA	NA	NA	NA	NA
1700016C19Rik	NA	NA	NA	NA	1.09	NA	NA	NA	NA
1700016D06Rik	NA	NA	NA	NA	NA	NA	1.16	NA	NA
1700016G14Rik	NA	NA	NA	NA	NA	NA	NA	NA	NA
1700016G22Rik	1.9	NA	NA	NA	NA	2.62	2.46	NA	NA
1700016H13Rik	NA	NA	NA	NA	NA	NA	NA	NA	NA
1700016J18Rik	NA	NA	NA	NA	NA	3.64	NA	NA	NA
1700016K19Rik	2.41	NA	NA	NA	1.79	1.76	2.23	NA	NA
1700016L04Rik	NA	NA	NA	NA	-2.02	NA	NA	NA	NA
1700016L21Rik	NA	NA	NA	NA	NA	NA	NA	NA	NA
1700016P04Rik	NA	NA	NA	NA	NA	NA	NA	NA	NA
1700017B05Rik	NA	NA	NA	NA	NA	NA	NA	NA	NA
1700017D01Rik	NA	NA	NA	NA	NA	NA	NA	NA	NA
1700017G19Rik	NA	NA	NA	NA	NA	NA	NA	NA	NA
1700017J07Rik	NA	NA	NA	NA	NA	NA	NA	NA	NA
1700017L05Rik	NA	NA	NA	NA	NA	NA	NA	NA	NA
1700017M07Rik	NA	NA	NA	NA	NA	NA	NA	NA	NA
1700017N19Rik	NA	NA	NA	NA	NA	NA	NA	NA	NA
1700018A04Rik	NA	NA	NA	NA	NA	NA	NA	NA	NA
1700018A23Rik	NA	NA	NA	NA	NA	NA	NA	NA	NA
1700018B08Rik	NA	NA	NA	NA	NA	NA	NA	NA	NA
1700018B24Rik	NA	NA	NA	3.67	2.1	NA	NA	NA	NA
1700018C11Rik	NA	NA	NA	NA	NA	NA	NA	NA	NA
1700018F24Rik	NA	NA	NA	NA	NA	NA	NA	NA	NA
1700018G05Rik	NA	NA	NA	NA	NA	NA	NA	NA	NA
1700018L02Rik	NA	NA	NA	NA	NA	NA	NA	NA	NA
1700019A02Rik	NA	NA	NA	NA	NA	NA	NA	1.79	NA
1700019B03Rik	NA	NA	NA	NA	NA	NA	NA	NA	NA
1700019B21Rik	NA	NA	NA	3.17	NA	NA	1.9	NA	NA
1700019C18Rik	NA	NA	NA	NA	NA	NA	NA	NA	NA
1700019D03Rik	NA	NA	NA	NA	NA	NA	NA	NA	NA
1700019E08Rik	NA	NA	NA	NA	NA	NA	NA	NA	NA
1700019F05Rik	NA	NA	NA	NA	NA	NA	NA	NA	NA
1700019G24Rik	2.74	NA	NA	NA	NA	2.67	NA	NA	NA
1700019J19Rik	NA	NA	NA	NA	NA	NA	NA	NA	NA
1700019L22Rik	NA	NA	NA	NA	NA	NA	NA	NA	NA
1700019M22Rik	NA	NA	NA	NA	NA	3.15	NA	NA	NA
1700019N19Rik	2.44	2.54	NA	NA	NA	2.43	3.02	NA	NA
1700019O17Rik	4.77	4.71	NA	NA	NA	2.48	1.98	NA	NA
1700019P21Rik	NA	NA	NA	NA	NA	NA	NA	NA	NA
1700020A23Rik	NA	NA	NA	NA	NA	NA	NA	NA	NA
1700020D05Rik	NA	NA	NA	NA	NA	NA	NA	-1.23	NA
1700020D12Rik	NA	NA	NA	NA	NA	NA	NA	NA	NA
1700020D14Rik	NA	NA	NA	NA	NA	NA	NA	NA	NA
1700020G17Rik	NA	NA	NA	NA	NA	NA	NA	NA	NA
1700020I14Rik	NA	NA	NA	NA	NA	NA	NA	NA	NA
1700020L24Rik	NA	NA	NA	NA	NA	1.07	NA	NA	NA
1700020M21Rik	NA	NA	NA	NA	NA	NA	NA	NA	NA
1700020N01Rik	1.5	2.49	NA	NA	NA	NA	-1.89	-1.97	NA
1700020N15Rik	NA	NA	NA	NA	NA	NA	NA	NA	NA
1700020N18Rik	NA	NA	NA	NA	NA	NA	NA	NA	NA
1700021F02Rik	NA	NA	NA	NA	NA	NA	NA	NA	NA
1700021F05Rik	-1.01	-1.1	NA	NA	NA	NA	NA	NA	NA
1700021F07Rik	NA	NA	NA	NA	NA	NA	NA	NA	NA
1700021L23Rik	NA	NA	NA	NA	NA	NA	NA	NA	NA
1700021N21Rik	NA	NA	NA	NA	NA	NA	NA	NA	NA
1700022A21Rik	NA	NA	NA	NA	NA	NA	NA	NA	NA
1700022A22Rik	NA	NA	NA	NA	NA	NA	NA	NA	NA
1700022E09Rik	NA	NA	NA	NA	NA	NA	NA	NA	NA
1700022H01Rik	NA	-1.29	NA	NA	NA	NA	NA	NA	NA
1700022H16Rik	NA	NA	NA	NA	NA	NA	NA	NA	NA
1700022I11Rik	NA	NA	NA	NA	NA	NA	NA	NA	NA
1700022N22Rik	NA	NA	NA	NA	NA	NA	NA	NA	NA
1700023C21Rik	NA	NA	NA	NA	NA	NA	NA	NA	NA
1700023F02Rik	NA	NA	NA	NA	NA	NA	NA	NA	NA
1700023F06Rik	NA	NA	NA	NA	NA	NA	NA	NA	NA
1700023G09Rik	NA	NA	NA	NA	NA	NA	NA	NA	NA
1700024B05Rik	NA	NA	NA	NA	NA	1.74	1.63	NA	NA
1700024B18Rik	NA	NA	NA	NA	NA	NA	NA	NA	NA
1700024F13Rik	NA	NA	NA	NA	NA	NA	NA	NA	NA
1700024G13Rik	NA	NA	NA	NA	NA	NA	NA	NA	NA
1700024I08Rik	NA	NA	NA	NA	NA	3.36	3.21	NA	NA
1700024N05Rik	NA	NA	NA	NA	NA	NA	NA	NA	NA
1700024P04Rik	NA	NA	NA	NA	NA	NA	NA	NA	NA
1700024P16Rik	NA	NA	NA	NA	NA	NA	NA	NA	NA
1700025B11Rik	NA	NA	NA	NA	NA	NA	NA	NA	NA
1700025C18Rik	NA	NA	NA	NA	NA	NA	NA	NA	NA
1700025D23Rik	NA	NA	NA	NA	NA	NA	NA	NA	NA
1700025F22Rik	NA	NA	NA	NA	NA	NA	NA	NA	NA
1700025F24Rik	NA	NA	NA	NA	NA	NA	NA	NA	NA
1700025G04Rik	NA	NA	NA	NA	NA	NA	NA	NA	NA
1700025J12Rik	NA	NA	NA	NA	NA	NA	NA	NA	NA
1700025K04Rik	NA	NA	NA	NA	NA	NA	NA	NA	NA
1700025K24Rik	NA	NA	NA	NA	NA	NA	NA	NA	NA
1700025M24Rik	NA	NA	NA	NA	NA	NA	NA	NA	NA
1700025N23Rik	NA	NA	NA	NA	NA	NA	NA	NA	NA
1700026D11Rik	NA	NA	NA	NA	NA	NA	NA	NA	NA
1700026F02Rik	NA	NA	NA	NA	NA	NA	NA	NA	NA
1700026J12Rik	NA	NA	NA	NA	NA	NA	NA	NA	NA
1700026J14Rik	NA	NA	NA	NA	-2.26	NA	NA	NA	NA
1700027A15Rik	NA	NA	NA	NA	NA	NA	NA	NA	NA
1700027F06Rik	NA	NA	NA	NA	NA	NA	NA	NA	NA
1700027F09Rik	NA	NA	NA	NA	NA	NA	NA	NA	NA
1700027H10Rik	NA	NA	NA	NA	NA	NA	NA	NA	NA
1700027I24Rik	NA	NA	NA	NA	NA	NA	NA	NA	NA
1700027J07Rik	NA	NA	NA	NA	NA	NA	NA	NA	NA
1700028B04Rik	NA	NA	NA	NA	NA	NA	NA	NA	NA
1700028D13Rik	NA	NA	NA	NA	NA	2.19	2.91	NA	NA
1700028E10Rik	NA	NA	NA	NA	NA	NA	NA	NA	NA
1700028I16Rik	NA	1.1	NA	NA	NA	NA	NA	NA	NA
1700028J19Rik	NA	NA	NA	NA	NA	NA	NA	NA	NA
1700028K03Rik	NA	NA	NA	NA	NA	NA	NA	NA	NA
1700028M03Rik	NA	NA	NA	NA	NA	NA	NA	NA	NA
1700028P14Rik	4.36	4.61	NA	NA	NA	NA	3.41	NA	NA
1700028P15Rik	NA	NA	NA	NA	NA	NA	NA	NA	NA
1700029B22Rik	NA	NA	NA	NA	NA	NA	NA	NA	NA
1700029F12Rik	NA	NA	NA	NA	NA	NA	NA	NA	NA
1700029H14Rik	NA	NA	NA	NA	NA	NA	NA	NA	NA
1700029I15Rik	NA	NA	NA	NA	NA	NA	NA	NA	NA
1700029J03Rik	1.66	NA	NA	NA	NA	NA	NA	NA	NA
1700029J07Rik	NA	NA	NA	NA	NA	NA	-1.6	NA	NA
1700029M03Rik	NA	NA	NA	NA	NA	NA	NA	NA	NA
1700029M20Rik	NA	NA	NA	NA	NA	NA	NA	NA	NA
1700029N11Rik	NA	NA	NA	NA	NA	NA	NA	NA	NA
1700029P11Rik	NA	NA	NA	NA	NA	NA	NA	2.64	NA
1700030A11Rik	2.87	1.95	NA	NA	NA	NA	NA	NA	NA
1700030C10Rik	NA	NA	NA	NA	NA	NA	NA	NA	NA
1700030C12Rik	NA	NA	NA	NA	NA	NA	NA	NA	NA
1700030C14Rik	2.39	NA	NA	5.46	NA	4.21	5.16	NA	NA
1700030F04Rik	NA	NA	NA	NA	NA	NA	NA	NA	NA
1700030F18Rik	3.2	NA	NA	NA	NA	NA	NA	NA	NA
1700030J22Rik	NA	NA	NA	NA	NA	NA	NA	NA	NA
1700030K09Rik	NA	NA	NA	NA	NA	NA	NA	NA	NA
1700030L20Rik	NA	NA	5.76	6.85	5.34	4.1	4.71	NA	NA
1700030L22Rik	NA	NA	NA	NA	NA	NA	NA	NA	NA
1700030M09Rik	NA	NA	NA	NA	NA	NA	NA	NA	NA
1700030N03Rik	NA	NA	NA	NA	NA	NA	NA	NA	NA
1700030O20Rik	NA	NA	NA	NA	NA	NA	NA	NA	NA
1700031A10Rik	NA	NA	NA	NA	NA	NA	NA	NA	NA
1700031F05Rik	NA	NA	NA	NA	NA	2.95	NA	NA	NA
1700031L13Rik	NA	NA	NA	NA	NA	NA	NA	NA	NA
1700031M16Rik	NA	NA	NA	NA	NA	NA	NA	NA	NA
1700031P21Rik	NA	NA	NA	NA	NA	NA	NA	NA	NA
1700034B16Rik	NA	NA	NA	NA	NA	NA	NA	NA	NA
1700034E13Rik	NA	NA	NA	NA	NA	NA	NA	NA	NA
1700034G24Rik	NA	NA	NA	NA	NA	NA	NA	NA	NA
1700034H15Rik	NA	NA	NA	NA	NA	NA	NA	NA	NA
1700034I23Rik	NA	NA	NA	NA	NA	NA	NA	NA	NA
1700034J05Rik	NA	NA	NA	NA	NA	NA	NA	NA	NA
1700034K08Rik	NA	NA	NA	NA	NA	NA	NA	NA	NA
1700034O15Rik	1.74	NA	NA	NA	NA	NA	NA	NA	NA
1700034P13Rik	NA	NA	NA	NA	NA	NA	NA	NA	NA
1700036A12Rik	NA	NA	NA	NA	NA	NA	NA	NA	NA
1700036G14Rik	NA	NA	NA	NA	NA	NA	NA	NA	NA
1700037C18Rik	NA	NA	NA	NA	NA	NA	NA	NA	NA
1700037H04Rik	NA	NA	NA	NA	NA	NA	NA	NA	NA
1700039E15Rik	NA	NA	NA	NA	NA	NA	NA	NA	NA
1700039E22Rik	NA	NA	NA	NA	NA	NA	NA	NA	NA
1700039I01Rik	NA	NA	NA	NA	NA	NA	NA	NA	NA
1700039M10Rik	NA	NA	NA	NA	NA	NA	NA	NA	NA
1700040D17Rik	NA	NA	NA	NA	NA	NA	NA	NA	NA
1700040G22Rik	NA	NA	NA	NA	NA	NA	NA	NA	NA
1700040L02Rik	NA	NA	NA	NA	NA	NA	NA	NA	NA
1700041A01Rik	NA	NA	NA	NA	NA	NA	NA	NA	NA
1700041B01Rik	NA	NA	NA	NA	NA	NA	NA	NA	NA
1700041C23Rik	NA	NA	NA	NA	NA	NA	NA	NA	NA
1700041M19Rik	NA	NA	NA	NA	NA	NA	NA	NA	NA
1700042G07Rik	NA	NA	NA	NA	NA	NA	NA	NA	NA
1700042G15Rik	NA	NA	NA	NA	NA	NA	NA	NA	NA
1700042O10Rik	NA	NA	NA	NA	NA	1.8	2.21	NA	NA
1700044C05Rik	2.88	NA	NA	NA	NA	NA	NA	NA	NA
1700044K03Rik	NA	NA	NA	NA	NA	NA	NA	NA	NA
1700045H11Rik	NA	NA	NA	NA	NA	NA	NA	NA	NA
1700046C09Rik	NA	NA	NA	NA	NA	NA	NA	NA	NA
1700047A11Rik	NA	NA	NA	NA	NA	NA	NA	NA	NA
1700047E10Rik	NA	NA	NA	NA	NA	2.11	2.27	NA	NA
1700047G03Rik	NA	NA	NA	NA	NA	NA	2.72	NA	NA
1700047I17Rik2	NA	1.24	NA	NA	NA	NA	NA	NA	NA
1700047L14Rik	NA	NA	NA	NA	NA	NA	NA	NA	NA
1700047M11Rik	NA	NA	NA	NA	NA	NA	NA	NA	NA
1700048B10Rik	NA	NA	NA	2.52	NA	NA	NA	NA	NA
1700048F04Rik	NA	NA	NA	NA	NA	NA	NA	NA	NA
1700048M11Rik	NA	NA	NA	NA	2.48	NA	NA	-2.96	NA
1700048O14Rik	NA	NA	NA	NA	NA	NA	NA	NA	NA
1700048O20Rik	NA	NA	NA	NA	NA	1.11	1.51	NA	NA
1700049E15Rik	NA	NA	NA	NA	NA	NA	NA	NA	NA
1700049E17Rik1	NA	NA	NA	NA	2.28	3.31	NA	NA	NA
1700049E17Rik2	NA	NA	NA	NA	NA	4.01	4.61	NA	NA
1700049E22Rik	1.29	NA	NA	NA	NA	NA	NA	NA	NA
1700049J03Rik	NA	NA	NA	NA	NA	NA	NA	NA	NA
1700049L16Rik	NA	NA	NA	NA	NA	NA	NA	NA	NA
1700051A21Rik	NA	NA	NA	NA	NA	NA	NA	NA	NA
1700052H01Rik	NA	NA	NA	NA	NA	NA	NA	NA	NA
1700052I22Rik	NA	NA	NA	NA	NA	NA	NA	NA	NA
1700052K11Rik	NA	NA	NA	2.23	NA	NA	1.16	NA	NA
1700054A03Rik	NA	NA	NA	NA	NA	NA	NA	NA	NA
1700054K19Rik	NA	NA	NA	NA	NA	NA	NA	NA	NA
1700054M17Rik	NA	NA	NA	NA	NA	NA	NA	NA	NA
1700054O19Rik	NA	NA	NA	NA	NA	NA	1.05	NA	NA
1700055C04Rik	NA	NA	NA	NA	NA	NA	NA	NA	NA
1700055D18Rik	NA	NA	NA	NA	NA	NA	NA	NA	NA
1700056E22Rik	NA	NA	NA	NA	NA	NA	NA	NA	NA
1700057G04Rik	NA	NA	NA	NA	NA	NA	NA	NA	NA
1700057H15Rik	2.93	NA	NA	NA	NA	NA	NA	NA	NA
1700057H21Rik	NA	NA	NA	NA	2.23	NA	NA	NA	NA
1700060C16Rik	NA	NA	NA	NA	NA	NA	NA	NA	NA
1700060C20Rik	NA	NA	NA	NA	NA	NA	NA	NA	NA
1700061F12Rik	NA	NA	NA	NA	NA	NA	NA	NA	NA
1700061G19Rik	NA	NA	NA	NA	NA	NA	NA	-2.26	NA
1700061I17Rik	4.24	4.65	NA	NA	NA	NA	NA	NA	NA
1700061J23Rik	NA	NA	NA	NA	NA	NA	NA	NA	NA
1700062C10Rik	NA	NA	NA	NA	NA	NA	NA	NA	NA
1700063A18Rik	NA	NA	NA	NA	NA	NA	NA	NA	NA
1700063D05Rik	NA	NA	NA	NA	NA	NA	NA	NA	NA
1700063H04Rik	NA	NA	NA	NA	NA	NA	NA	NA	NA
1700063H06Rik	NA	NA	NA	NA	NA	NA	NA	NA	NA
1700063O14Rik	NA	NA	NA	NA	NA	NA	NA	NA	NA
1700064F23Rik	NA	NA	NA	NA	NA	NA	NA	NA	NA
1700064J06Rik	NA	NA	NA	NA	NA	NA	NA	NA	NA
1700064M15Rik	NA	NA	NA	NA	NA	NA	NA	NA	NA
1700065D16Rik	NA	NA	NA	NA	NA	NA	NA	NA	NA
1700065I16Rik	NA	NA	NA	NA	NA	NA	NA	NA	NA
1700065J11Rik	3.06	3.79	NA	NA	NA	NA	NA	NA	NA
1700065J18Rik	NA	NA	NA	NA	NA	NA	NA	NA	NA
1700065L07Rik	NA	NA	NA	NA	NA	NA	NA	NA	NA
1700065O20Rik	NA	NA	NA	NA	NA	NA	NA	NA	NA
1700066B17Rik	NA	NA	NA	NA	NA	NA	NA	NA	NA
1700066B19Rik	NA	NA	NA	NA	NA	NA	NA	NA	NA
1700066C05Rik	NA	NA	NA	NA	NA	NA	NA	NA	NA
1700066J03Rik	NA	NA	NA	NA	NA	NA	NA	NA	NA
1700066M21Rik	NA	NA	NA	NA	NA	NA	NA	NA	NA
1700066N21Rik	NA	NA	NA	2.48	NA	NA	NA	NA	NA
1700066O22Rik	NA	NA	NA	NA	NA	NA	NA	NA	NA
1700067G17Rik	NA	NA	NA	NA	NA	NA	NA	-2.96	NA
1700067K01Rik	NA	NA	NA	NA	NA	NA	NA	NA	NA
1700067P10Rik	NA	NA	NA	NA	NA	NA	NA	NA	NA
1700069L16Rik	NA	NA	NA	NA	NA	NA	NA	NA	NA
1700069P05Rik	NA	NA	NA	NA	NA	NA	NA	NA	NA
1700071G01Rik	NA	NA	NA	NA	NA	NA	NA	NA	NA
1700071K01Rik	NA	NA	NA	NA	NA	NA	NA	NA	NA
1700071M16Rik	NA	NA	NA	NA	NA	NA	NA	NA	NA
1700072B07Rik	NA	NA	NA	NA	NA	NA	NA	NA	NA
1700072I22Rik	NA	NA	NA	NA	NA	NA	NA	NA	NA
1700072O05Rik	NA	NA	NA	NA	NA	NA	NA	NA	NA
1700073E17Rik	1.36	NA	NA	NA	NA	NA	NA	NA	NA
1700074H08Rik	NA	NA	NA	NA	NA	NA	NA	NA	NA
1700074P13Rik	NA	NA	NA	NA	NA	NA	NA	NA	NA
1700080E11Rik	NA	NA	NA	NA	NA	NA	NA	NA	NA
1700080G11Rik	NA	NA	NA	NA	NA	2.63	4.93	NA	NA
1700080G18Rik	NA	NA	NA	NA	NA	NA	NA	NA	NA
1700080N15Rik	NA	NA	NA	NA	NA	NA	NA	NA	NA
1700080O16Rik	NA	NA	NA	1.73	NA	NA	NA	NA	NA
1700081B01Rik	NA	NA	NA	NA	NA	NA	NA	NA	NA
1700081H04Rik	NA	NA	NA	NA	NA	NA	NA	NA	NA
1700083H02Rik	NA	NA	NA	NA	NA	NA	NA	NA	NA
1700084D21Rik	NA	NA	NA	NA	NA	NA	NA	NA	NA
1700084E18Rik	NA	NA	NA	NA	NA	NA	NA	NA	NA
1700084F23Rik	NA	NA	NA	NA	NA	NA	NA	NA	NA
1700084J12Rik	NA	NA	NA	1.91	NA	NA	NA	NA	NA
1700084M14Rik	NA	NA	NA	NA	NA	NA	3.09	NA	NA
1700085C21Rik	NA	NA	NA	NA	NA	NA	NA	NA	NA
1700086D15Rik	NA	NA	NA	NA	NA	NA	NA	NA	NA
1700086L19Rik	1.9	NA	NA	NA	NA	2.65	3.91	NA	NA
1700086O06Rik	NA	NA	NA	NA	NA	NA	NA	NA	NA
1700086P04Rik	NA	NA	NA	NA	NA	NA	NA	NA	NA
1700087I21Rik	NA	NA	NA	NA	NA	NA	NA	NA	NA
1700087M22Rik	NA	NA	NA	NA	NA	NA	NA	NA	NA
1700088E04Rik	NA	NA	NA	NA	NA	NA	NA	NA	NA
1700091H14Rik	NA	NA	NA	NA	NA	NA	4.21	NA	NA
1700092C02Rik	NA	NA	NA	NA	NA	NA	NA	NA	NA
1700092C10Rik	NA	NA	NA	NA	NA	NA	NA	NA	NA
1700092E19Rik	NA	NA	NA	NA	NA	NA	NA	NA	NA
1700092K14Rik	NA	NA	NA	NA	NA	NA	NA	NA	NA
1700092M07Rik	NA	NA	NA	NA	NA	NA	NA	NA	NA
1700093K21Rik	NA	NA	NA	NA	-1.09	3.39	3.57	NA	NA
1700094D03Rik	NA	1.1	NA	NA	NA	NA	NA	NA	NA
1700094J05Rik	NA	NA	NA	NA	NA	NA	NA	NA	NA
1700094M23Rik	NA	NA	NA	NA	NA	NA	NA	NA	NA
1700094M24Rik	NA	NA	NA	NA	NA	NA	NA	NA	NA
1700095A13Rik	NA	NA	NA	NA	NA	NA	NA	NA	NA
1700095A21Rik	NA	NA	NA	NA	NA	NA	NA	NA	NA
1700095B10Rik	NA	NA	NA	NA	NA	NA	NA	NA	NA
1700095J03Rik	NA	NA	NA	NA	NA	NA	NA	NA	NA
1700095J12Rik	NA	NA	NA	NA	NA	NA	NA	NA	NA
1700096J18Rik	NA	NA	NA	NA	NA	NA	NA	NA	NA
1700096K18Rik	NA	NA	NA	NA	NA	NA	NA	NA	NA
1700096P03Rik	NA	NA	NA	NA	NA	NA	NA	NA	NA
1700097N02Rik	-1.35	-1.35	NA	NA	-1.28	NA	NA	NA	NA
1700099I09Rik	NA	NA	NA	NA	NA	NA	NA	NA	NA
1700100I10Rik	NA	NA	NA	NA	NA	NA	1.45	NA	NA
1700100L14Rik	NA	NA	NA	NA	NA	NA	NA	NA	NA
1700101G07Rik	NA	NA	NA	NA	NA	NA	NA	NA	NA
1700101I11Rik	NA	NA	NA	NA	NA	NA	NA	NA	NA
1700101O22Rik	NA	NA	NA	NA	NA	NA	NA	NA	NA
1700102H20Rik	NA	NA	NA	NA	NA	3.95	NA	-2.48	NA
1700102J08Rik	NA	NA	NA	NA	NA	NA	NA	NA	NA
1700102P08Rik	NA	NA	NA	NA	NA	NA	NA	NA	NA
1700104L18Rik	NA	NA	NA	NA	NA	NA	NA	NA	NA
1700105P06Rik	NA	NA	NA	NA	NA	NA	NA	NA	NA
1700108F19Rik	NA	NA	NA	NA	NA	NA	NA	-5.77	NA
1700108J01Rik	NA	NA	NA	NA	NA	NA	NA	NA	NA
1700108N06Rik	NA	NA	NA	NA	NA	NA	NA	NA	NA
1700109G14Rik	4.7	5.44	NA	NA	NA	NA	NA	NA	NA
1700109G15Rik	NA	NA	NA	NA	NA	NA	NA	NA	NA
1700109H08Rik	NA	NA	NA	NA	NA	NA	NA	NA	NA
1700109I08Rik	NA	NA	NA	NA	NA	NA	NA	NA	NA
1700109K24Rik	NA	NA	NA	NA	NA	NA	NA	NA	NA
1700110C19Rik	2.02	2.26	NA	NA	NA	NA	NA	NA	NA
1700110I01Rik	NA	NA	NA	NA	NA	NA	NA	NA	NA
1700110I07Rik	NA	NA	NA	NA	NA	NA	NA	NA	NA
1700110K17Rik	NA	NA	NA	NA	2.28	NA	NA	NA	NA
1700111N16Rik	NA	NA	NA	NA	NA	NA	NA	NA	NA
1700112D23Rik	NA	2.24	NA	NA	NA	NA	NA	NA	NA
1700112E06Rik	NA	NA	NA	3.62	NA	NA	NA	NA	NA
1700112H15Rik	NA	NA	NA	NA	NA	NA	NA	NA	NA
1700112J05Rik	NA	NA	NA	NA	NA	NA	NA	NA	NA
1700112J16Rik	NA	NA	NA	NA	NA	NA	NA	NA	NA
1700112N08Rik	NA	NA	NA	NA	NA	NA	NA	NA	NA
1700113A16Rik	NA	NA	NA	NA	NA	NA	NA	NA	NA
1700113B09Rik	NA	NA	NA	NA	NA	NA	NA	NA	NA
1700113H08Rik	NA	NA	NA	NA	NA	NA	NA	NA	NA
1700116B05Rik	NA	NA	NA	NA	NA	NA	NA	NA	NA
1700116H05Rik	NA	NA	NA	NA	NA	NA	NA	NA	NA
1700119H24Rik	NA	NA	NA	NA	NA	NA	NA	NA	NA
1700120C14Rik	NA	NA	NA	NA	NA	NA	NA	-2.82	NA
1700120E14Rik	NA	NA	NA	NA	NA	NA	NA	NA	NA
1700120G07Rik	NA	NA	NA	NA	NA	NA	NA	NA	NA
1700120K04Rik	NA	NA	NA	NA	NA	NA	NA	NA	NA
1700121L16Rik	NA	NA	NA	NA	NA	NA	NA	NA	NA
1700121N20Rik	NA	NA	NA	NA	NA	NA	NA	NA	NA
1700122C19Rik	NA	NA	NA	NA	NA	NA	NA	NA	NA
1700122E12Rik	NA	NA	NA	NA	NA	NA	1.08	NA	NA
1700122H20Rik	NA	NA	NA	NA	NA	NA	3.48	NA	NA
1700122O11Rik	NA	NA	NA	NA	NA	NA	NA	NA	NA
1700123J17Rik	NA	NA	NA	NA	-1.44	NA	NA	NA	NA
1700123K08Rik	NA	NA	NA	2.65	NA	2.79	4.04	NA	NA
1700123L14Rik	NA	1.82	NA	NA	2.03	NA	NA	NA	NA
1700123M08Rik	NA	NA	NA	NA	NA	NA	NA	NA	NA
1700123O12Rik	NA	NA	NA	NA	NA	NA	NA	NA	NA
1700123O20Rik	NA	NA	NA	NA	NA	NA	NA	NA	NA
1700123O21Rik	NA	NA	NA	NA	NA	NA	NA	NA	NA
1700124L16Rik	NA	NA	NA	NA	NA	NA	NA	NA	NA
1700124M09Rik	NA	NA	NA	NA	NA	NA	NA	NA	NA
1700125G02Rik	NA	NA	NA	NA	NA	NA	NA	NA	NA
1700125G22Rik	NA	NA	NA	NA	NA	NA	NA	NA	NA
1700125H03Rik	NA	NA	NA	NA	NA	NA	NA	NA	NA
1700125H20Rik	1.6	1.35	NA	NA	NA	NA	NA	NA	NA
1700126G02Rik	1.09	NA	NA	NA	NA	NA	NA	-2.34	NA
1700126H18Rik	NA	NA	NA	NA	NA	NA	NA	NA	NA
1700128A07Rik	NA	NA	NA	NA	NA	3.32	3.15	NA	NA
1700128E19Rik	NA	NA	NA	NA	NA	NA	NA	NA	NA
1700128F08Rik	NA	NA	NA	NA	NA	NA	NA	NA	NA
1700129C05Rik	NA	NA	NA	NA	NA	NA	NA	NA	NA
1810006J02Rik	NA	NA	NA	NA	NA	NA	NA	NA	NA
1810007C17Rik	NA	NA	NA	NA	NA	NA	NA	NA	NA
1810007D17Rik	NA	NA	NA	NA	NA	NA	NA	NA	NA
1810008I18Rik	NA	NA	NA	NA	NA	NA	NA	NA	NA
1810009A15Rik	NA	NA	NA	NA	NA	NA	NA	NA	NA
1810009J06Rik	NA	NA	NA	NA	NA	NA	2.52	NA	NA
1810009N02Rik	NA	NA	NA	NA	-1.39	NA	NA	NA	NA
1810010D01Rik	NA	NA	NA	NA	NA	NA	NA	NA	NA
1810010H24Rik	NA	NA	NA	NA	NA	NA	NA	NA	NA
1810011H11Rik	NA	NA	NA	NA	NA	NA	NA	NA	NA
1810011O10Rik	1.36	1.98	NA	NA	NA	1.05	1.35	NA	NA
1810012K16Rik	NA	NA	NA	NA	NA	NA	NA	NA	NA
1810013A23Rik	NA	NA	NA	NA	NA	NA	NA	NA	NA
1810013D15Rik	NA	NA	NA	NA	NA	1.08	1.79	NA	NA
1810013L24Rik	NA	NA	NA	NA	NA	NA	NA	NA	NA
1810014B01Rik	NA	NA	NA	NA	NA	NA	NA	NA	NA
1810018F18Rik	NA	NA	NA	NA	NA	NA	NA	NA	NA
1810019D21Rik	NA	1.68	NA	NA	-1.15	NA	NA	NA	NA
1810019N24Rik	NA	NA	NA	NA	2.22	NA	NA	NA	NA
1810020O05Rik	NA	2.63	NA	NA	NA	NA	NA	NA	NA
1810021B22Rik	NA	NA	NA	NA	NA	NA	NA	NA	NA
1810021M19Rik	NA	NA	NA	NA	NA	NA	NA	NA	NA
1810022K09Rik	NA	NA	NA	NA	NA	NA	NA	NA	NA
1810024B03Rik	NA	NA	NA	NA	NA	NA	NA	NA	NA
1810026B05Rik	NA	NA	NA	NA	NA	NA	NA	NA	NA
1810030O07Rik	NA	NA	NA	NA	NA	NA	NA	NA	NA
1810032O08Rik	NA	1.06	NA	NA	NA	NA	NA	NA	NA
1810034E14Rik	NA	NA	NA	NA	NA	NA	NA	NA	NA
1810035K13Rik	NA	NA	NA	NA	NA	NA	NA	NA	NA
1810037I17Rik	NA	NA	NA	NA	NA	NA	NA	NA	NA
1810041H14Rik	NA	NA	NA	NA	NA	NA	NA	NA	NA
1810041L15Rik	3.65	4.08	NA	NA	NA	1.91	2.09	NA	NA
1810043G02Rik	NA	NA	NA	NA	NA	NA	NA	NA	NA
1810044D09Rik	NA	NA	NA	NA	NA	NA	NA	NA	NA
1810046K07Rik	NA	NA	NA	NA	NA	NA	NA	NA	NA
1810049I09Rik	NA	NA	NA	NA	NA	NA	NA	NA	NA
1810053B23Rik	NA	NA	NA	NA	NA	NA	NA	NA	NA
1810055G02Rik	NA	NA	NA	NA	NA	NA	NA	NA	NA
1810058I24Rik	NA	NA	NA	NA	NA	NA	NA	NA	NA
1810062G17Rik	NA	NA	NA	4.94	NA	3.22	4.03	NA	3.17
1810062O18Rik	NA	NA	NA	NA	NA	NA	NA	NA	NA
1810063I02Rik	NA	NA	NA	NA	NA	NA	NA	-2.48	NA
1810064F22Rik	NA	NA	NA	NA	NA	NA	1.25	NA	NA
1810065E05Rik	NA	NA	NA	NA	NA	NA	NA	NA	NA
1810073O08Rik	NA	NA	NA	NA	NA	2.06	NA	NA	NA
2010001A14Rik	NA	NA	NA	NA	NA	NA	NA	NA	NA
2010003K11Rik	NA	NA	NA	NA	NA	NA	NA	NA	NA
2010005H15Rik	NA	NA	NA	NA	NA	NA	NA	NA	NA
2010009K17Rik	NA	NA	NA	NA	NA	NA	NA	NA	NA
2010010A06Rik	NA	NA	NA	NA	NA	NA	NA	NA	NA
2010016I18Rik	NA	NA	NA	NA	NA	NA	NA	NA	NA
2010106C02Rik	NA	NA	NA	NA	NA	NA	NA	NA	NA
2010106E10Rik	NA	NA	NA	NA	NA	NA	NA	NA	NA
2010107E04Rik	NA	NA	NA	NA	-1.12	NA	NA	NA	NA
2010107G12Rik	NA	NA	NA	NA	-1.19	NA	NA	NA	NA
2010107G23Rik	NA	NA	NA	NA	NA	NA	NA	NA	NA
2010109A12Rik	NA	NA	NA	NA	NA	NA	NA	NA	NA
2010109I03Rik	NA	NA	NA	NA	NA	NA	NA	NA	NA
2010110K18Rik	NA	1	NA	NA	NA	NA	NA	NA	NA
2010111I01Rik	NA	NA	NA	NA	NA	NA	NA	NA	NA
2010203P06Rik	NA	NA	NA	NA	NA	NA	NA	NA	NA
2010204K13Rik	NA	NA	NA	-2.41	NA	NA	NA	NA	NA
2010300C02Rik	3.24	3.22	NA	NA	1.5	1.6	1.45	NA	NA
2010308F09Rik	NA	NA	NA	NA	NA	NA	NA	NA	NA
2010310C07Rik	NA	NA	NA	NA	NA	NA	NA	NA	NA
2010315B03Rik	NA	NA	NA	NA	NA	NA	NA	NA	NA
2010320M18Rik	NA	NA	NA	NA	NA	NA	NA	NA	NA
2010320O07Rik	NA	NA	NA	NA	NA	NA	NA	NA	NA
2200002D01Rik	NA	NA	NA	NA	NA	NA	NA	NA	NA
2200002J24Rik	NA	NA	NA	NA	NA	NA	NA	NA	NA
2210008F06Rik	NA	NA	NA	NA	NA	NA	NA	NA	NA
2210010C04Rik	NA	NA	NA	NA	NA	NA	NA	NA	NA
2210011C24Rik	NA	NA	NA	NA	NA	NA	NA	NA	NA
2210011K15Rik	NA	NA	NA	NA	NA	NA	NA	NA	NA
2210013O21Rik	NA	NA	NA	NA	NA	NA	NA	NA	NA
2210016F16Rik	NA	NA	NA	NA	NA	NA	NA	NA	NA
2210016L21Rik	NA	NA	NA	NA	NA	NA	NA	NA	NA
2210019I11Rik	2.22	2.11	NA	NA	NA	2.63	2.51	NA	NA
2210039B01Rik	NA	NA	NA	NA	NA	NA	NA	NA	NA
2210404E10Rik	2.23	1.75	NA	NA	NA	NA	NA	NA	NA
2210406O10Rik	1.28	1.51	NA	NA	NA	NA	NA	NA	NA
2210407C18Rik	NA	NA	NA	NA	NA	NA	NA	NA	NA
2210408F21Rik	NA	NA	NA	NA	NA	NA	NA	NA	NA
2210408I21Rik	NA	NA	NA	NA	NA	NA	NA	NA	NA
2210409D07Rik	NA	NA	NA	NA	NA	NA	NA	NA	NA
2210409E12Rik	NA	NA	NA	4.27	1.43	NA	NA	NA	NA
2210414B05Rik	NA	NA	NA	NA	NA	2.69	3.74	NA	NA
2210416O15Rik	NA	NA	NA	NA	NA	NA	NA	NA	NA
2210417A02Rik	NA	NA	NA	NA	2.01	NA	NA	NA	NA
2210418O10Rik	NA	NA	NA	NA	NA	NA	NA	NA	NA
2210420H20Rik	NA	NA	NA	NA	NA	NA	NA	NA	NA
2300002M23Rik	NA	NA	NA	NA	NA	NA	NA	NA	NA
2300003K06Rik	NA	NA	NA	NA	NA	NA	NA	NA	NA
2300009A05Rik	NA	NA	NA	NA	NA	NA	NA	NA	NA
2310001H17Rik	NA	NA	NA	NA	NA	NA	NA	NA	NA
2310001K24Rik	NA	NA	NA	NA	NA	NA	NA	NA	NA
2310002D06Rik	NA	NA	NA	NA	NA	NA	NA	NA	NA
2310002F09Rik	NA	NA	NA	NA	NA	NA	NA	NA	NA
2310002L09Rik	NA	NA	NA	NA	NA	NA	NA	NA	NA
2310003N18Rik	NA	NA	NA	NA	NA	NA	NA	NA	NA
2310005A03Rik	NA	NA	NA	NA	NA	NA	NA	NA	NA
2310005E17Rik	2.1	2.52	NA	NA	NA	NA	NA	NA	NA
2310007B03Rik	4.6	3.34	NA	NA	-2.23	3.53	3.5	NA	NA
2310008N11Rik	3.92	3.07	NA	NA	NA	NA	3.74	NA	NA
2310009A05Rik	NA	NA	NA	NA	NA	NA	NA	NA	NA
2310009B15Rik	NA	NA	NA	NA	NA	NA	NA	NA	NA
2310010J17Rik	NA	NA	NA	NA	NA	NA	NA	NA	NA
2310011J03Rik	NA	NA	NA	NA	NA	NA	NA	NA	NA
2310014F06Rik	NA	NA	NA	NA	NA	NA	NA	NA	NA
2310015A10Rik	NA	NA	NA	NA	NA	NA	NA	NA	NA
2310015A16Rik	NA	NA	NA	NA	NA	NA	NA	NA	NA
2310015D24Rik	NA	NA	NA	NA	NA	NA	NA	NA	NA
2310015K22Rik	NA	1.45	NA	NA	NA	NA	1.45	NA	NA
2310016D03Rik	NA	NA	NA	NA	NA	NA	NA	NA	NA
2310016D23Rik	NA	NA	NA	NA	NA	NA	NA	NA	NA
2310016G11Rik	NA	NA	NA	NA	2.08	NA	NA	NA	NA
2310020H05Rik	NA	NA	NA	NA	NA	NA	NA	NA	NA
2310022A10Rik	NA	NA	NA	NA	NA	NA	NA	NA	NA
2310022B05Rik	NA	-1.17	NA	NA	NA	NA	NA	NA	NA
2310026I22Rik	NA	NA	NA	NA	NA	NA	NA	NA	NA
2310030A07Rik	NA	NA	NA	NA	NA	NA	NA	NA	NA
2310030G06Rik	NA	NA	NA	-2.65	NA	NA	NA	NA	NA
2310033P09Rik	NA	NA	NA	NA	NA	NA	NA	NA	NA
2310034C09Rik	NA	NA	NA	NA	NA	NA	NA	NA	NA
2310034G01Rik	NA	NA	NA	NA	NA	NA	NA	NA	NA
2310034O05Rik	NA	1.6	NA	NA	NA	NA	NA	-2.48	NA
2310034P14Rik	NA	NA	NA	NA	NA	NA	NA	NA	NA
2310035C23Rik	NA	NA	NA	NA	NA	NA	NA	NA	NA
2310036O22Rik	NA	NA	NA	NA	NA	NA	NA	NA	NA
2310039H08Rik	NA	NA	NA	NA	NA	NA	NA	NA	NA
2310039L15Rik	NA	NA	NA	NA	1	2.56	3.4	NA	2.6
2310040G24Rik	NA	NA	NA	NA	NA	NA	NA	NA	NA
2310043L19Rik	NA	NA	NA	NA	NA	NA	NA	NA	NA
2310043O21Rik	NA	1.72	NA	NA	NA	NA	NA	NA	NA
2310045n01rik-mef2b	NA	NA	NA	NA	2.43	NA	NA	-4.03	NA
2310047D07Rik	NA	NA	NA	NA	NA	NA	NA	NA	NA
2310050C09Rik	NA	NA	NA	NA	NA	NA	NA	NA	NA
2310057J18Rik	NA	NA	NA	NA	NA	NA	NA	NA	NA
2310057M21Rik	NA	NA	NA	NA	NA	NA	NA	NA	NA
2310057N15Rik	NA	NA	NA	NA	NA	NA	NA	NA	NA
2310061I04Rik	-1.38	-1.23	NA	NA	NA	NA	NA	NA	NA
2310061N02Rik	NA	NA	NA	NA	NA	NA	NA	NA	NA
2310065F04Rik	NA	NA	NA	NA	NA	NA	NA	NA	NA
2310067E19Rik	-1.02	-1.35	NA	NA	NA	NA	NA	NA	NA
2310068J16Rik	NA	NA	NA	NA	NA	NA	NA	NA	NA
2310069B03Rik	NA	1.61	NA	NA	NA	NA	NA	-2.96	NA
2310069G16Rik	NA	NA	NA	NA	NA	NA	NA	NA	NA
2310075C17Rik	NA	1.35	NA	NA	NA	NA	NA	NA	NA
2310075K07Rik	NA	NA	NA	NA	NA	NA	NA	NA	NA
2310079G19Rik	NA	NA	NA	NA	NA	NA	NA	NA	NA
2310081J21Rik	NA	NA	NA	NA	NA	NA	NA	NA	NA
2400006E01Rik	NA	NA	NA	NA	NA	NA	NA	NA	NA
2410002F23Rik	NA	NA	NA	NA	NA	NA	NA	NA	NA
2410003L11Rik	NA	NA	NA	NA	NA	NA	NA	NA	NA
2410004B18Rik	NA	NA	NA	NA	NA	NA	NA	NA	NA
2410004I01Rik	1.84	1.81	NA	NA	NA	NA	NA	NA	NA
2410004P03Rik	NA	NA	NA	NA	NA	NA	NA	NA	NA
2410006H16Rik	NA	1.59	NA	NA	NA	NA	NA	NA	NA
2410012E07Rik	NA	NA	NA	NA	NA	NA	NA	NA	NA
2410015M20Rik	NA	NA	NA	NA	NA	NA	NA	NA	NA
2410016O06Rik	NA	-1.02	NA	NA	NA	NA	NA	NA	NA
2410017I17Rik	2.88	2.75	NA	NA	NA	NA	NA	NA	NA
2410018L13Rik	NA	NA	NA	NA	NA	NA	NA	NA	NA
2410021H03Rik	NA	NA	NA	NA	NA	NA	NA	NA	NA
2410022M11Rik	NA	NA	NA	NA	NA	NA	NA	NA	NA
2410080I02Rik	NA	NA	NA	NA	NA	NA	NA	NA	NA
2410089E03Rik	NA	NA	NA	NA	NA	NA	NA	NA	NA
2410124H12Rik	2.77	2.69	NA	NA	NA	NA	NA	NA	NA
2410131K14Rik	NA	NA	NA	NA	NA	NA	NA	NA	NA
2410137M14Rik	NA	NA	NA	1.53	NA	1.13	1.27	NA	NA
2410141K09Rik	NA	NA	NA	NA	NA	NA	NA	NA	NA
2500002B13Rik	NA	NA	NA	NA	NA	NA	NA	NA	NA
2500004C02Rik	NA	NA	NA	NA	NA	1.13	1.75	NA	NA
2510002D24Rik	NA	NA	NA	NA	NA	NA	NA	NA	NA
2510003B16Rik	1.06	1.05	NA	NA	NA	NA	NA	NA	NA
2510009E07Rik	NA	NA	NA	3.58	1.37	NA	NA	NA	NA
2510039O18Rik	NA	NA	NA	NA	NA	NA	NA	NA	NA
2610001J05Rik	NA	NA	NA	NA	NA	NA	NA	NA	NA
2610002M06Rik	NA	NA	NA	NA	NA	NA	NA	NA	NA
2610005L07Rik	NA	NA	NA	NA	NA	NA	NA	NA	NA
2610008E11Rik	NA	1.36	NA	NA	NA	NA	NA	NA	NA
2610016A17Rik	NA	NA	NA	NA	NA	NA	NA	NA	NA
2610020C07Rik	NA	NA	NA	NA	NA	NA	NA	NA	NA
2610020H08Rik	NA	NA	NA	NA	NA	NA	NA	NA	NA
2610021A01Rik	NA	NA	NA	NA	NA	NA	NA	NA	NA
2610027F03Rik	NA	NA	NA	NA	NA	NA	3.18	NA	NA
2610027K06Rik	NA	NA	NA	NA	NA	NA	NA	-2.54	NA
2610028E06Rik	NA	NA	NA	NA	NA	NA	NA	-4.06	NA
2610028H24Rik	NA	NA	NA	NA	NA	NA	NA	NA	NA
2610035D17Rik	NA	NA	NA	NA	NA	NA	NA	NA	NA
2610035F20Rik	-1.37	-1.57	NA	NA	NA	NA	NA	NA	NA
2610036A22Rik	NA	NA	NA	NA	NA	NA	NA	NA	NA
2610037D02Rik	NA	NA	NA	NA	-1.16	NA	NA	NA	NA
2610042L04Rik	NA	NA	NA	NA	NA	NA	NA	NA	NA
2610044O15Rik8	NA	NA	NA	NA	NA	NA	NA	NA	NA
2610203C22Rik	NA	NA	NA	NA	NA	NA	NA	NA	NA
2610206C17Rik	NA	NA	NA	NA	NA	NA	NA	NA	NA
2610300M13Rik	NA	NA	NA	NA	-1.91	NA	NA	NA	NA
2610301B20Rik	NA	NA	NA	NA	NA	NA	NA	NA	NA
2610305D13Rik	NA	NA	NA	NA	NA	NA	NA	NA	NA
2610306M01Rik	NA	NA	NA	NA	NA	NA	NA	NA	NA
2610307P16Rik	NA	NA	NA	NA	NA	NA	NA	NA	NA
2610316D01Rik	NA	NA	NA	NA	NA	NA	NA	NA	NA
2610318N02Rik	-1.09	NA	NA	NA	NA	NA	NA	-2.03	NA
2610507B11Rik	NA	NA	NA	NA	NA	NA	NA	NA	NA
2610507I01Rik	NA	NA	NA	NA	NA	NA	NA	NA	NA
2610524H06Rik	NA	NA	NA	NA	NA	NA	NA	NA	NA
2610528A11Rik	NA	NA	NA	NA	1.27	NA	NA	NA	NA
2610528J11Rik	1.36	NA	NA	-3.07	-2.22	NA	NA	NA	NA
26Sor	NA	NA	NA	NA	-1.04	NA	NA	NA	NA
2700012I20Rik	NA	NA	NA	NA	NA	NA	NA	NA	NA
2700038G22Rik	NA	NA	NA	NA	NA	NA	NA	NA	NA
2700046A07Rik	NA	NA	NA	NA	NA	NA	NA	NA	NA
2700046G09Rik	NA	NA	NA	NA	NA	NA	NA	NA	NA
2700049A03Rik	NA	NA	NA	NA	NA	NA	NA	NA	NA
2700054A10Rik	NA	NA	NA	NA	NA	NA	NA	NA	NA
2700060E02Rik	NA	NA	NA	NA	NA	NA	NA	NA	NA
2700062C07Rik	NA	NA	NA	NA	NA	NA	NA	NA	NA
2700069I18Rik	NA	NA	NA	NA	NA	NA	NA	NA	NA
2700070H01Rik	NA	NA	NA	NA	NA	NA	1.07	NA	NA
2700081O15Rik	NA	NA	NA	NA	NA	NA	NA	NA	NA
2700089I24Rik	NA	NA	NA	NA	NA	NA	NA	NA	NA
2700097O09Rik	NA	NA	NA	NA	NA	NA	NA	NA	NA
2700099C18Rik	NA	NA	NA	NA	NA	NA	NA	NA	NA
2810001G20Rik	NA	NA	NA	1.58	NA	NA	NA	NA	NA
2810002D19Rik	NA	NA	NA	NA	NA	NA	NA	NA	NA
2810004N23Rik	NA	NA	NA	NA	NA	NA	NA	NA	NA
2810006K23Rik	NA	NA	NA	NA	NA	NA	NA	NA	NA
2810013P06Rik	NA	NA	NA	NA	-1.04	NA	NA	NA	NA
2810021J22Rik	NA	NA	NA	NA	NA	NA	NA	NA	NA
2810025M15Rik	NA	NA	NA	NA	NA	NA	NA	NA	NA
2810029C07Rik	2.28	1.67	NA	NA	NA	NA	NA	NA	NA
2810030D12Rik	NA	NA	NA	NA	NA	NA	NA	NA	NA
2810032G03Rik	NA	NA	NA	NA	NA	NA	NA	NA	NA
2810039B14Rik	NA	NA	NA	NA	NA	NA	NA	NA	NA
2810047C21Rik1	NA	NA	NA	NA	NA	NA	NA	NA	NA
2810049E08Rik	NA	NA	NA	NA	NA	NA	NA	NA	NA
2810403A07Rik	NA	NA	NA	NA	NA	NA	NA	NA	NA
2810403D21Rik	1.34	1.66	NA	NA	NA	NA	NA	NA	NA
2810404M03Rik	NA	NA	NA	NA	NA	NA	NA	NA	NA
2810405F15Rik	NA	NA	NA	NA	NA	NA	NA	NA	NA
2810407A14Rik	NA	NA	NA	NA	NA	1.83	2.28	NA	NA
2810408A11Rik	NA	NA	NA	NA	NA	NA	NA	NA	NA
2810408B13Rik	NA	NA	NA	NA	NA	NA	NA	NA	NA
2810408I11Rik	NA	NA	NA	NA	NA	NA	NA	NA	NA
2810410L24Rik	NA	NA	NA	NA	NA	NA	NA	NA	NA
2810417H13Rik	NA	NA	NA	-1.01	NA	NA	NA	NA	NA
2810428I15Rik	NA	NA	NA	NA	NA	NA	NA	NA	NA
2810429I04Rik	NA	NA	NA	NA	NA	NA	1.27	NA	NA
2810433D01Rik	NA	NA	NA	NA	NA	NA	NA	NA	NA
2810442N19Rik	NA	NA	NA	NA	NA	NA	NA	NA	NA
2810454H06Rik	NA	NA	NA	NA	NA	NA	NA	NA	NA
2810459M11Rik	2.39	2.29	NA	NA	NA	NA	NA	NA	NA
2810468N07Rik	NA	NA	NA	NA	NA	NA	NA	NA	NA
2810471M01Rik	NA	NA	NA	NA	NA	NA	2.3	NA	NA
2810474O19Rik	NA	NA	NA	NA	NA	NA	NA	NA	NA
2900005J15Rik	NA	NA	NA	NA	NA	NA	NA	NA	NA
2900009J06Rik	NA	NA	NA	NA	NA	NA	NA	NA	NA
2900011O08Rik	NA	NA	NA	NA	NA	NA	NA	NA	NA
2900026A02Rik	NA	NA	NA	NA	NA	NA	NA	NA	NA
2900040C04Rik	NA	-1.43	NA	2.22	NA	NA	NA	NA	NA
2900041M22Rik	NA	NA	NA	NA	NA	NA	NA	NA	NA
2900052N01Rik	4.23	4.21	NA	NA	NA	NA	2.99	NA	NA
2900055J20Rik	NA	NA	NA	NA	NA	NA	NA	NA	NA
2900057B20Rik	NA	NA	NA	NA	NA	NA	NA	NA	NA
2900060B14Rik	NA	NA	NA	NA	-2.12	NA	NA	NA	NA
2900060L22Rik	NA	NA	NA	NA	NA	NA	NA	NA	NA
2900076A07Rik	NA	NA	NA	NA	NA	NA	NA	NA	NA
2900079G21Rik	NA	NA	NA	NA	2.58	NA	NA	NA	NA
2900089D17Rik	NA	NA	NA	NA	NA	NA	NA	NA	NA
2900092C05Rik	NA	NA	NA	NA	NA	NA	NA	NA	NA
2900092D14Rik	NA	NA	NA	NA	NA	NA	2.66	NA	NA
2900097C17Rik	NA	NA	NA	NA	NA	NA	NA	NA	NA
3000002C10Rik	NA	NA	NA	NA	NA	NA	NA	NA	NA
3010001F23Rik	NA	NA	NA	NA	NA	NA	NA	NA	NA
3010003L21Rik	NA	NA	NA	NA	NA	NA	NA	NA	NA
3010026O09Rik	NA	NA	NA	NA	NA	NA	NA	NA	NA
3100003L05Rik	NA	NA	NA	NA	NA	3.32	NA	NA	NA
3110002H16Rik	NA	NA	NA	NA	NA	NA	NA	NA	NA
3110004A20Rik	NA	NA	NA	NA	NA	NA	NA	NA	NA
3110009E18Rik	NA	NA	NA	NA	-1.56	NA	NA	NA	NA
3110009F21Rik	NA	NA	NA	NA	NA	NA	NA	NA	NA
3110009M11Rik	NA	NA	NA	NA	NA	NA	NA	NA	NA
3110015C05Rik	NA	NA	NA	NA	NA	NA	NA	NA	NA
3110021A11Rik	NA	NA	NA	NA	-1.64	NA	NA	NA	NA
3110035E14Rik	NA	NA	NA	NA	NA	NA	NA	NA	NA
3110039I08Rik	NA	NA	NA	NA	NA	NA	NA	NA	NA
3110039M20Rik	NA	NA	NA	NA	NA	NA	NA	NA	NA
3110040M04Rik	1.12	NA	4.21	5.01	6.33	3.95	4.38	NA	2.38
3110040N11Rik	NA	NA	NA	NA	NA	NA	NA	NA	NA
3110043O21Rik	NA	NA	NA	NA	NA	NA	NA	NA	NA
3110045C21Rik	NA	NA	NA	NA	NA	NA	NA	NA	NA
3110052M02Rik	NA	NA	NA	NA	NA	NA	NA	NA	NA
3110053B16Rik	NA	NA	NA	NA	NA	NA	NA	NA	NA
3110056K07Rik	NA	NA	NA	NA	NA	NA	NA	NA	NA
3110062M04Rik	NA	NA	NA	NA	NA	NA	NA	NA	NA
3110067G11Rik	NA	NA	NA	NA	NA	NA	NA	NA	NA
3110070M22Rik	NA	NA	NA	NA	NA	NA	NA	NA	NA
3110079O15Rik	NA	1.88	NA	NA	NA	NA	NA	NA	NA
3110082I17Rik	NA	NA	NA	NA	NA	NA	NA	NA	NA
3110082J24Rik	NA	NA	NA	NA	NA	NA	NA	NA	NA
3110083C13Rik	NA	1.31	NA	NA	NA	NA	1.42	NA	NA
3110099E03Rik	NA	NA	NA	NA	NA	NA	NA	NA	NA
3200001D21Rik	NA	NA	NA	NA	NA	NA	NA	NA	NA
3300002A11Rik	NA	NA	NA	NA	NA	NA	NA	NA	NA
3300002I08Rik	NA	NA	NA	NA	NA	NA	NA	NA	NA
3300002P13Rik	NA	NA	NA	NA	NA	NA	NA	NA	NA
3300005D01Rik	NA	NA	NA	NA	1.23	NA	NA	NA	NA
3425401B19Rik	NA	NA	NA	NA	NA	NA	NA	NA	NA
3632451O06Rik	NA	NA	NA	NA	NA	NA	NA	NA	NA
3632454L22Rik	NA	NA	NA	NA	NA	NA	NA	NA	NA
3830403N18Rik	2.97	NA	NA	NA	NA	NA	NA	NA	NA
3830406C13Rik	NA	NA	NA	NA	NA	NA	NA	NA	NA
3830408C21Rik	NA	NA	NA	NA	NA	NA	NA	NA	NA
3830417A13Rik	2.14	1.08	NA	2.06	NA	1.49	1.66	NA	NA
3830432H09Rik	1.07	1.59	NA	NA	NA	NA	NA	NA	NA
3930402G23Rik	NA	1.99	NA	NA	NA	NA	NA	NA	NA
4430402I18Rik	NA	NA	NA	NA	NA	NA	NA	NA	NA
4631405J19Rik	NA	NA	NA	NA	NA	NA	NA	NA	NA
4631405K08Rik	NA	NA	NA	NA	NA	NA	NA	NA	NA
4632404H12Rik	NA	NA	NA	NA	NA	NA	NA	NA	NA
4632415L05Rik	NA	NA	NA	NA	NA	NA	NA	NA	NA
4632427E13Rik	NA	NA	NA	NA	NA	NA	NA	NA	NA
4632428C04Rik	NA	NA	NA	NA	NA	NA	NA	NA	NA
4732414G09Rik	NA	NA	NA	NA	NA	NA	NA	NA	NA
4732416N19Rik	NA	NA	NA	NA	NA	NA	NA	NA	NA
4732419C18Rik	NA	NA	NA	NA	NA	1.31	1.89	NA	NA
4732440D04Rik	NA	NA	NA	NA	NA	NA	NA	NA	NA
4732465J04Rik	NA	NA	NA	NA	NA	NA	2.52	NA	NA
4732471J01Rik	NA	NA	NA	NA	NA	NA	NA	NA	NA
4732490B19Rik	NA	NA	NA	NA	NA	NA	NA	NA	NA
4732491K20Rik	NA	NA	NA	NA	NA	NA	NA	NA	NA
4831407H17Rik	NA	NA	NA	NA	NA	NA	NA	NA	NA
4831440D22Rik	NA	NA	NA	NA	NA	NA	NA	NA	NA
4831440E17Rik	NA	NA	NA	NA	NA	NA	NA	NA	NA
4833411C07Rik	NA	NA	NA	NA	NA	NA	NA	NA	NA
4833412C05Rik	NA	NA	NA	NA	-2.72	NA	NA	NA	NA
4833415N18Rik	NA	NA	NA	NA	NA	NA	NA	NA	NA
4833417C18Rik	NA	-1.47	NA	-1.05	-1.38	NA	NA	NA	NA
4833418N02Rik	NA	NA	NA	NA	NA	NA	NA	NA	NA
4833419F23Rik	NA	NA	NA	NA	NA	NA	NA	NA	NA
4833420G17Rik	NA	NA	NA	NA	NA	NA	NA	NA	NA
4833422C13Rik	2.62	NA	NA	NA	NA	NA	NA	NA	NA
4833422M21Rik	-1.18	NA	NA	NA	NA	NA	NA	NA	NA
4833423E24Rik	1.88	NA	NA	NA	NA	NA	4.05	NA	NA
4833427F10Rik	NA	NA	NA	NA	NA	NA	NA	NA	NA
4833427G06Rik	NA	NA	NA	NA	2.03	3.1	4.19	NA	NA
4833428L15Rik	NA	4.03	NA	NA	NA	NA	NA	NA	NA
4833438C02Rik	NA	1.78	NA	NA	NA	NA	NA	NA	NA
4833439L19Rik	NA	NA	NA	NA	NA	NA	NA	NA	NA
4833447I15Rik	NA	NA	NA	NA	NA	NA	NA	NA	NA
4921501E09Rik	NA	NA	NA	NA	NA	NA	NA	NA	NA
4921504A21Rik	NA	NA	NA	NA	NA	NA	NA	NA	NA
4921504E06Rik	NA	NA	NA	NA	NA	NA	NA	NA	NA
4921507G05Rik	NA	NA	NA	NA	-2.21	NA	NA	NA	NA
4921507P07Rik	NA	2.54	NA	2.65	NA	1.66	2.39	NA	2.92
4921508D12Rik	NA	NA	NA	NA	NA	NA	NA	NA	NA
4921509C19Rik	NA	NA	NA	NA	NA	NA	NA	NA	NA
4921509O07Rik	NA	NA	NA	NA	NA	NA	NA	NA	NA
4921511C10Rik	NA	1.3	NA	NA	NA	NA	2.55	NA	NA
4921511C20Rik	NA	NA	NA	NA	NA	NA	NA	NA	NA
4921511H03Rik	NA	NA	NA	NA	NA	NA	NA	NA	NA
4921511I17Rik	NA	NA	NA	NA	NA	NA	NA	NA	NA
4921511M17Rik	NA	NA	NA	NA	NA	NA	NA	NA	NA
4921513H07Rik	NA	NA	NA	NA	NA	NA	NA	NA	NA
4921513I03Rik	NA	NA	NA	2.49	NA	NA	NA	NA	NA
4921515E04Rik	NA	NA	NA	NA	NA	NA	1.87	NA	NA
4921517D16Rik	NA	NA	NA	NA	NA	NA	NA	NA	NA
4921517D22Rik	NA	3.3	NA	NA	NA	NA	NA	NA	NA
4921518K17Rik	NA	NA	NA	NA	NA	NA	NA	NA	NA
4921524J17Rik	NA	NA	NA	NA	NA	NA	NA	NA	NA
4921524L21Rik	NA	NA	NA	NA	NA	NA	NA	NA	NA
4921525O09Rik	NA	NA	NA	NA	2.54	1.6	1.5	NA	NA
4921528I07Rik	NA	NA	NA	4.1	1.71	NA	3.49	NA	NA
4921529L05Rik	NA	NA	NA	NA	NA	NA	NA	NA	NA
4921530L21Rik	NA	NA	NA	NA	NA	NA	NA	NA	NA
4921531C22Rik	NA	NA	NA	NA	NA	NA	1.52	NA	NA
4921531P14Rik	NA	NA	NA	NA	NA	NA	NA	NA	NA
4921533I20Rik	NA	NA	NA	NA	NA	2.95	4.36	NA	NA
4921534H16Rik	NA	NA	NA	NA	NA	NA	NA	NA	NA
4921536K21Rik	NA	NA	NA	NA	NA	NA	NA	NA	NA
4921539E11Rik	NA	NA	NA	NA	NA	NA	NA	NA	NA
4922502D21Rik	NA	NA	NA	NA	NA	NA	NA	NA	NA
4922502H24Rik	NA	NA	NA	NA	NA	NA	NA	NA	NA
4922502N22Rik	NA	NA	NA	NA	NA	NA	NA	NA	NA
4930401C15Rik	NA	NA	NA	NA	NA	NA	NA	NA	NA
4930401G09Rik	1.9	NA	NA	NA	NA	NA	NA	NA	NA
4930401O10Rik	NA	NA	NA	NA	NA	NA	NA	NA	NA
4930401O12Rik	NA	NA	NA	NA	NA	NA	NA	NA	NA
4930402D18Rik	NA	NA	NA	NA	NA	NA	NA	NA	NA
4930402F06Rik	NA	NA	NA	NA	NA	NA	NA	NA	NA
4930402F11Rik	NA	NA	NA	NA	NA	NA	NA	NA	NA
4930402H24Rik	NA	NA	NA	NA	NA	NA	NA	NA	NA
4930402K13Rik	NA	NA	NA	NA	NA	NA	NA	NA	NA
4930403D09Rik	NA	NA	NA	NA	NA	NA	NA	NA	NA
4930404A05Rik	NA	NA	NA	NA	NA	NA	NA	NA	NA
4930404H11Rik	NA	NA	NA	NA	NA	NA	NA	NA	NA
4930404H24Rik	NA	NA	NA	NA	1.85	NA	NA	NA	NA
4930404I05Rik	NA	NA	NA	NA	NA	NA	NA	NA	NA
4930404I20Rik	NA	NA	NA	NA	NA	NA	NA	NA	NA
4930404K13Rik	NA	NA	NA	NA	NA	NA	NA	NA	NA
4930404N11Rik	NA	NA	NA	NA	NA	NA	NA	-2.54	NA
4930405A10Rik	NA	NA	NA	2.29	NA	NA	NA	NA	NA
4930405A21Rik	NA	NA	NA	NA	NA	NA	NA	NA	NA
4930405D01Rik	NA	NA	NA	NA	NA	NA	NA	NA	NA
4930405D11Rik	NA	NA	NA	NA	NA	NA	NA	NA	NA
4930405J17Rik	NA	NA	NA	NA	NA	NA	NA	NA	NA
4930405L22Rik	NA	NA	NA	NA	NA	NA	NA	NA	NA
4930405O22Rik	NA	NA	NA	NA	NA	NA	NA	NA	NA
4930406D18Rik	NA	NA	NA	NA	NA	NA	NA	NA	NA
4930407G08Rik	NA	NA	NA	NA	NA	NA	NA	NA	NA
4930407I02Rik	NA	NA	NA	NA	NA	NA	NA	NA	NA
4930407I10Rik	NA	NA	NA	NA	NA	2.62	2.98	NA	NA
4930407I19Rik	NA	NA	NA	NA	NA	NA	NA	NA	NA
4930412B13Rik	NA	NA	NA	NA	NA	NA	NA	NA	NA
4930412C18Rik	NA	NA	NA	NA	NA	2.55	NA	NA	NA
4930412E21Rik	NA	NA	NA	NA	NA	NA	NA	NA	NA
4930412F12Rik	NA	NA	NA	NA	-2.01	NA	NA	NA	NA
4930412L05Rik	NA	NA	NA	NA	NA	NA	NA	NA	NA
4930412O13Rik	NA	NA	NA	NA	NA	NA	NA	NA	NA
4930413E15Rik	NA	NA	NA	NA	NA	NA	NA	NA	NA
4930413F20Rik	NA	NA	NA	NA	NA	NA	2.58	NA	NA
4930413G21Rik	NA	NA	NA	NA	NA	NA	NA	NA	NA
4930413M19Rik	NA	NA	NA	NA	NA	NA	NA	NA	NA
4930414F18Rik	NA	3	NA	NA	NA	NA	NA	NA	NA
4930414N06Rik	NA	NA	NA	NA	NA	NA	NA	NA	NA
4930415F15Rik	NA	NA	NA	NA	NA	NA	NA	NA	NA
4930415L06Rik	NA	NA	NA	NA	NA	NA	NA	NA	NA
4930415O20Rik	NA	NA	NA	NA	NA	NA	NA	NA	NA
4930417H01Rik	NA	NA	NA	NA	NA	NA	NA	NA	NA
4930417O13Rik	NA	NA	NA	NA	NA	NA	NA	NA	NA
4930417O22Rik	NA	NA	NA	NA	NA	NA	NA	-2.83	NA
4930419G24Rik	NA	NA	NA	NA	NA	NA	NA	NA	NA
4930421P07Rik	NA	1.47	NA	NA	NA	NA	NA	NA	NA
4930423D24Rik	NA	NA	NA	NA	NA	NA	NA	NA	NA
4930423M02Rik	NA	NA	NA	NA	NA	NA	NA	NA	NA
4930425K10Rik	NA	NA	NA	NA	NA	NA	NA	NA	NA
4930425L21Rik	NA	NA	NA	NA	NA	NA	NA	NA	NA
4930425O10Rik	NA	NA	NA	NA	NA	NA	NA	NA	NA
4930426D05Rik	NA	NA	NA	NA	NA	NA	NA	NA	NA
4930426I24Rik	NA	NA	NA	NA	NA	NA	NA	NA	NA
4930426L09Rik	NA	NA	NA	NA	NA	NA	NA	NA	NA
4930427A07Rik	NA	NA	NA	NA	NA	NA	NA	NA	NA
4930428D20Rik	NA	NA	NA	NA	NA	NA	NA	NA	NA
4930428E07Rik	NA	NA	NA	NA	NA	NA	NA	NA	NA
4930428G15Rik	NA	NA	NA	NA	NA	NA	NA	NA	NA
4930428N03Rik	NA	NA	NA	NA	NA	NA	NA	NA	NA
4930428O21Rik	NA	NA	NA	NA	NA	NA	NA	NA	NA
4930429B21Rik	NA	NA	NA	NA	NA	NA	NA	NA	NA
4930429D17Rik	NA	NA	NA	NA	NA	NA	NA	NA	NA
4930429F11Rik	NA	NA	NA	NA	NA	NA	NA	NA	NA
4930429F24Rik	NA	NA	NA	NA	NA	NA	NA	NA	NA
4930429P21Rik	NA	NA	NA	NA	NA	NA	NA	NA	NA
4930430A15Rik	NA	NA	NA	NA	NA	NA	NA	NA	NA
4930430E12Rik	NA	NA	NA	NA	NA	NA	NA	NA	NA
4930430F08Rik	NA	NA	NA	NA	NA	NA	NA	NA	NA
4930430F21Rik	NA	NA	NA	NA	NA	NA	NA	NA	NA
4930430J02Rik	NA	NA	NA	NA	NA	NA	NA	NA	NA
4930431F10Rik	NA	NA	NA	NA	NA	NA	NA	NA	NA
4930431F12Rik	NA	NA	NA	NA	1.41	NA	NA	NA	NA
4930431P03Rik	NA	NA	NA	NA	NA	NA	NA	NA	NA
4930431P22Rik	NA	2.13	NA	NA	NA	NA	NA	NA	NA
4930432E11Rik	NA	NA	NA	NA	NA	NA	NA	NA	NA
4930432J09Rik	NA	NA	NA	NA	NA	NA	NA	NA	NA
4930432K21Rik	NA	NA	NA	NA	NA	NA	NA	NA	NA
4930432L08Rik	NA	NA	NA	NA	NA	NA	NA	NA	NA
4930432M17Rik	NA	NA	NA	NA	NA	NA	NA	NA	NA
4930432O09Rik	NA	NA	NA	NA	NA	NA	NA	NA	NA
4930433B08Rik	NA	NA	NA	NA	NA	NA	NA	NA	NA
4930433I11Rik	NA	NA	NA	3.65	NA	3	3.6	NA	NA
4930433N12Rik	NA	NA	NA	NA	NA	NA	NA	NA	NA
4930434B07Rik	NA	NA	NA	NA	NA	NA	NA	NA	NA
4930434J06Rik	NA	NA	NA	NA	NA	NA	NA	NA	NA
4930435E12Rik	NA	NA	NA	NA	NA	NA	NA	NA	NA
4930435F18Rik	NA	NA	NA	NA	NA	NA	NA	3.36	NA
4930437M23Rik	NA	NA	NA	NA	NA	NA	NA	NA	NA
4930438A08Rik	2.65	2.2	NA	NA	NA	NA	NA	NA	NA
4930438E09Rik	NA	NA	NA	NA	NA	NA	NA	NA	NA
4930439A04Rik	NA	NA	NA	NA	NA	NA	NA	NA	NA
4930439D14Rik	NA	NA	NA	NA	-3.2	NA	NA	NA	NA
4930440C22Rik	NA	NA	NA	NA	NA	NA	NA	NA	NA
4930440I19Rik	NA	NA	NA	NA	NA	NA	NA	NA	NA
4930441H08Rik	NA	NA	NA	NA	NA	NA	NA	NA	NA
4930441J16Rik	NA	NA	NA	NA	NA	NA	NA	NA	NA
4930442E04Rik	NA	NA	NA	NA	NA	NA	NA	NA	NA
4930442J19Rik	NA	NA	NA	NA	NA	NA	NA	NA	NA
4930442L01Rik	NA	NA	NA	NA	NA	NA	NA	NA	NA
4930443O20Rik	NA	-2.66	NA	NA	NA	NA	NA	NA	NA
4930444A19Rik	NA	NA	NA	1.74	NA	NA	NA	NA	NA
4930444F02Rik	6.36	6.03	NA	NA	NA	NA	NA	NA	NA
4930444G20Rik	NA	NA	NA	NA	NA	NA	NA	NA	NA
4930444M15Rik	NA	NA	NA	NA	NA	NA	NA	NA	NA
4930444P10Rik	NA	NA	NA	NA	NA	NA	1.61	NA	NA
4930445E18Rik	1.84	NA	NA	NA	NA	NA	NA	NA	NA
4930445N18Rik	NA	NA	NA	NA	NA	NA	NA	NA	NA
4930447A16Rik	NA	NA	NA	NA	NA	NA	NA	NA	NA
4930447C04Rik	1.05	NA	NA	NA	NA	NA	NA	NA	NA
4930447F24Rik	2.3	NA	NA	NA	2.42	2.22	NA	NA	NA
4930447J18Rik	NA	NA	NA	NA	NA	NA	NA	NA	NA
4930447K03Rik	NA	NA	NA	NA	NA	NA	NA	NA	NA
4930447M23Rik	NA	NA	NA	NA	NA	NA	NA	NA	NA
4930447N08Rik	NA	NA	NA	NA	NA	NA	NA	NA	NA
4930448C13Rik	NA	NA	NA	NA	NA	NA	NA	NA	NA
4930448F12Rik	NA	NA	NA	NA	NA	NA	NA	NA	NA
4930448H16Rik	NA	NA	NA	NA	NA	NA	NA	NA	NA
4930448I06Rik	NA	NA	NA	NA	NA	NA	NA	NA	NA
4930448I18Rik	NA	NA	NA	NA	NA	NA	NA	NA	NA
4930448K20Rik	NA	NA	NA	NA	NA	NA	NA	NA	NA
4930449C09Rik	NA	NA	NA	NA	NA	NA	NA	NA	NA
4930449E01Rik	NA	NA	NA	NA	NA	NA	NA	NA	NA
4930449E18Rik	NA	NA	NA	NA	NA	NA	NA	NA	NA
4930449I24Rik	NA	NA	NA	NA	NA	NA	NA	NA	NA
4930451E10Rik	NA	NA	NA	NA	NA	NA	NA	NA	NA
4930451G09Rik	NA	NA	NA	NA	NA	NA	NA	NA	NA
4930451I11Rik	NA	NA	NA	NA	NA	NA	NA	NA	NA
4930452A19Rik	NA	NA	NA	NA	NA	NA	NA	NA	NA
4930452B06Rik	NA	NA	NA	NA	NA	NA	NA	NA	NA
4930452G13Rik	NA	NA	NA	NA	NA	NA	NA	NA	NA
4930452N14Rik	NA	NA	NA	NA	NA	NA	NA	NA	NA
4930453H23Rik	NA	NA	NA	NA	NA	NA	NA	NA	NA
4930453L07Rik	NA	NA	NA	NA	NA	NA	2.49	NA	NA
4930453N24Rik	NA	NA	NA	NA	NA	NA	NA	NA	NA
4930455B14Rik	NA	NA	NA	NA	NA	NA	NA	NA	NA
4930455C13Rik	NA	NA	NA	NA	NA	NA	NA	NA	NA
4930455D15Rik	NA	NA	NA	NA	NA	NA	NA	NA	NA
4930455F16Rik	NA	NA	NA	NA	NA	NA	NA	NA	NA
4930455G09Rik	NA	NA	NA	NA	1.47	NA	NA	NA	NA
4930455H04Rik	NA	NA	NA	NA	NA	NA	NA	NA	NA
4930455J16Rik	NA	NA	NA	NA	NA	NA	NA	NA	NA
4930456L15Rik	NA	NA	NA	NA	NA	NA	NA	NA	NA
4930458A03Rik	NA	NA	NA	NA	NA	NA	NA	NA	NA
4930459C07Rik	NA	NA	NA	NA	NA	NA	NA	NA	NA
4930459I23Rik	NA	NA	NA	NA	-1.56	NA	NA	NA	NA
4930459L07Rik	NA	NA	NA	NA	NA	NA	NA	NA	NA
4930461C15Rik	NA	NA	NA	NA	NA	NA	NA	NA	NA
4930461G14Rik	NA	NA	NA	NA	NA	NA	NA	NA	NA
4930463O16Rik	NA	NA	NA	NA	NA	NA	NA	NA	NA
4930465K10Rik	NA	NA	NA	NA	NA	NA	NA	NA	NA
4930465M20Rik	NA	NA	NA	NA	NA	NA	NA	NA	NA
4930467D21Rik	NA	NA	NA	NA	NA	NA	NA	NA	NA
4930467E23Rik	NA	NA	NA	NA	NA	NA	NA	NA	NA
4930467J12Rik	NA	NA	NA	NA	NA	NA	NA	NA	NA
4930467K11Rik	NA	NA	NA	2.67	NA	NA	NA	NA	NA
4930469G21Rik	NA	NA	NA	NA	NA	NA	NA	NA	NA
4930469K13Rik	NA	NA	NA	NA	NA	NA	NA	NA	NA
4930470H14Rik	NA	NA	NA	NA	NA	NA	NA	2.6	NA
4930470O06Rik	NA	NA	NA	NA	NA	NA	NA	NA	NA
4930470P17Rik	NA	NA	NA	NA	NA	NA	NA	NA	NA
4930471C04Rik	NA	NA	NA	NA	NA	NA	NA	NA	NA
4930471G03Rik	NA	NA	NA	NA	NA	NA	NA	NA	NA
4930471G24Rik	NA	NA	NA	NA	NA	NA	NA	NA	NA
4930471L23Rik	NA	NA	NA	2.76	NA	NA	2.72	NA	NA
4930471M09Rik	NA	NA	NA	NA	NA	NA	NA	NA	NA
4930473A02Rik	NA	NA	NA	NA	NA	NA	NA	NA	NA
4930473H19Rik	NA	NA	NA	NA	NA	NA	NA	NA	NA
4930473O22Rik	NA	NA	NA	NA	NA	NA	NA	NA	NA
4930474G06Rik	NA	NA	NA	NA	NA	NA	1.35	NA	NA
4930474H20Rik	NA	NA	NA	NA	NA	NA	NA	NA	NA
4930474M22Rik	NA	NA	NA	NA	NA	NA	NA	NA	NA
4930474N05Rik	NA	NA	NA	NA	NA	NA	NA	NA	NA
4930474N09Rik	NA	NA	NA	NA	NA	NA	NA	NA	NA
4930477N07Rik	NA	2.02	NA	NA	2.16	NA	NA	NA	NA
4930478L05Rik	NA	NA	NA	NA	NA	NA	NA	NA	NA
4930478P22Rik	NA	NA	NA	NA	NA	NA	NA	NA	NA
4930479D17Rik	NA	NA	NA	NA	NA	NA	NA	NA	NA
4930479H17Rik	2.05	2.62	NA	NA	NA	NA	NA	NA	NA
4930480E11Rik	NA	NA	NA	NA	NA	NA	NA	NA	NA
4930480G23Rik	NA	NA	NA	NA	NA	NA	NA	NA	NA
4930480K15Rik	NA	NA	NA	NA	NA	NA	NA	NA	NA
4930480K23Rik	NA	NA	2.83	3.88	2.16	2.91	3.78	NA	NA
4930480M12Rik	NA	NA	NA	NA	NA	NA	NA	NA	NA
4930481A15Rik	NA	NA	NA	NA	NA	NA	NA	NA	NA
4930482G09Rik	NA	NA	NA	NA	NA	NA	NA	NA	NA
4930483J18Rik	NA	NA	NA	NA	NA	NA	NA	NA	NA
4930483K19Rik	NA	NA	NA	NA	NA	NA	NA	NA	NA
4930483O08Rik	NA	NA	NA	NA	NA	NA	NA	NA	NA
4930484H19Rik	NA	NA	NA	NA	NA	NA	NA	NA	NA
4930486F22Rik	NA	NA	NA	NA	NA	NA	NA	NA	NA
4930486I03Rik	NA	NA	NA	NA	NA	NA	NA	NA	NA
4930486L24Rik	NA	NA	NA	1.31	NA	NA	-1.33	NA	NA
4930487D11Rik	NA	NA	NA	NA	NA	NA	NA	NA	NA
4930487H11Rik	NA	NA	NA	-2.13	NA	NA	NA	NA	NA
4930488B22Rik	NA	NA	NA	NA	NA	NA	NA	NA	NA
4930488L21Rik	NA	NA	NA	NA	NA	NA	NA	NA	NA
4930488N24Rik	-1.32	-2.44	NA	-1.59	NA	NA	2.24	NA	NA
4930500A05Rik	NA	NA	NA	NA	NA	1.61	1.61	NA	NA
4930500F04Rik	NA	NA	NA	NA	NA	NA	NA	NA	NA
4930500G05Rik	2.16	2.44	NA	NA	NA	NA	NA	NA	NA
4930500H12Rik	NA	NA	NA	NA	NA	NA	NA	NA	NA
4930500L23Rik	NA	NA	NA	NA	NA	NA	NA	NA	NA
4930502A04Rik	NA	NA	NA	NA	NA	NA	NA	NA	NA
4930502C15Rik	NA	NA	NA	NA	NA	NA	NA	-2.48	NA
4930502E09Rik	NA	NA	NA	NA	NA	NA	NA	NA	NA
4930502E18Rik	NA	NA	NA	NA	1.64	1.84	1.83	NA	NA
4930503B20Rik	NA	NA	NA	NA	NA	NA	NA	NA	NA
4930503E14Rik	NA	NA	NA	NA	NA	NA	NA	NA	NA
4930503E24Rik	NA	NA	NA	NA	NA	NA	NA	NA	NA
4930503F20Rik	NA	NA	NA	NA	NA	NA	NA	NA	NA
4930503H13Rik	NA	NA	NA	NA	NA	NA	NA	NA	NA
4930503L19Rik	NA	NA	NA	NA	NA	NA	NA	NA	NA
4930503O07Rik	NA	NA	NA	NA	NA	NA	NA	NA	NA
4930504C09Rik	NA	NA	NA	NA	NA	NA	1.44	NA	NA
4930504O13Rik	NA	NA	NA	NA	NA	NA	NA	NA	NA
4930505A04Rik	1.01	NA	NA	NA	NA	NA	NA	NA	NA
4930505G20Rik	NA	NA	NA	NA	NA	NA	NA	NA	NA
4930505K13Rik	NA	NA	NA	NA	NA	NA	NA	NA	NA
4930505K14Rik	NA	NA	NA	NA	NA	NA	NA	NA	NA
4930505N22Rik	NA	NA	NA	NA	NA	NA	NA	NA	NA
4930505O20Rik	NA	NA	NA	NA	NA	NA	NA	NA	NA
4930506A18Rik	NA	NA	NA	NA	NA	NA	NA	NA	NA
4930506C21Rik	NA	NA	NA	NA	NA	NA	NA	NA	NA
4930507D05Rik	NA	NA	NA	NA	-1.74	NA	NA	NA	NA
4930507D10Rik	NA	NA	NA	NA	NA	NA	NA	NA	NA
4930509E16Rik	NA	NA	NA	NA	NA	NA	NA	NA	NA
4930509J09Rik	NA	NA	NA	NA	NA	NA	NA	NA	NA
4930509K18Rik	NA	NA	NA	NA	NA	NA	NA	NA	NA
4930511A02Rik	NA	NA	NA	NA	NA	NA	NA	NA	NA
4930511A08Rik	NA	NA	NA	NA	NA	NA	NA	NA	NA
4930511E03Rik	NA	NA	NA	NA	NA	NA	NA	NA	NA
4930511M06Rik	NA	NA	NA	NA	NA	NA	NA	NA	NA
4930512B01Rik	NA	NA	NA	NA	NA	NA	NA	NA	NA
4930512H18Rik	NA	NA	NA	NA	NA	NA	NA	NA	NA
4930512J16Rik	NA	2.33	NA	2.56	1.47	NA	1.1	NA	NA
4930512M02Rik	NA	NA	NA	NA	NA	1.07	1.58	NA	NA
4930513D17Rik	NA	NA	NA	NA	NA	NA	NA	NA	NA
4930513L16Rik	NA	NA	NA	NA	NA	NA	NA	NA	NA
4930513N10Rik	NA	NA	NA	NA	NA	NA	NA	NA	NA
4930513O06Rik	NA	NA	NA	NA	NA	NA	NA	NA	NA
4930515B02Rik	NA	NA	NA	NA	NA	NA	NA	NA	NA
4930515G01Rik	NA	NA	NA	NA	NA	NA	NA	NA	NA
4930515G16Rik	NA	NA	NA	NA	NA	NA	NA	NA	NA
4930515L03Rik	NA	NA	NA	NA	NA	NA	NA	NA	NA
4930515L19Rik	2.18	NA	NA	NA	NA	NA	NA	NA	NA
4930517E11Rik	NA	NA	NA	NA	NA	NA	NA	NA	NA
4930517G24Rik	NA	NA	NA	NA	-1.33	NA	NA	NA	NA
4930517M08Rik	NA	NA	NA	NA	NA	NA	NA	NA	NA
4930518J21Rik	NA	NA	NA	NA	NA	NA	NA	NA	NA
4930518P08Rik	NA	NA	NA	NA	NA	NA	NA	NA	NA
4930519D14Rik	NA	NA	NA	NA	NA	NA	NA	NA	NA
4930519F09Rik	NA	NA	NA	NA	NA	NA	1.08	NA	NA
4930519F16Rik	NA	NA	NA	NA	NA	NA	NA	NA	NA
4930519F24Rik	NA	NA	NA	NA	NA	NA	NA	NA	NA
4930519G04Rik	NA	1.72	NA	NA	NA	NA	NA	NA	NA
4930519H02Rik	NA	NA	NA	NA	NA	NA	NA	NA	NA
4930519K11Rik	NA	NA	NA	NA	NA	NA	NA	NA	NA
4930520O04Rik	NA	NA	NA	NA	NA	NA	NA	NA	NA
4930520P13Rik	NA	NA	NA	NA	NA	NA	NA	NA	NA
4930521E06Rik	NA	NA	NA	NA	NA	NA	NA	NA	NA
4930521O11Rik	NA	NA	NA	NA	NA	NA	1.23	NA	NA
4930521O17Rik	NA	NA	NA	NA	NA	NA	NA	NA	NA
4930522H14Rik	NA	NA	NA	NA	NA	NA	NA	NA	NA
4930522L14Rik	1.15	1.68	NA	NA	NA	NA	NA	NA	NA
4930522O17Rik	NA	NA	NA	NA	NA	NA	NA	NA	NA
4930522P08Rik	NA	NA	NA	NA	NA	NA	NA	NA	NA
4930523C07Rik	2.67	1.51	NA	NA	NA	3.67	2.71	NA	NA
4930523O13Rik	NA	NA	NA	NA	NA	NA	NA	NA	NA
4930524B15Rik	NA	NA	NA	NA	1.53	1.31	1.47	NA	NA
4930524B17Rik	NA	NA	NA	NA	NA	NA	2.5	NA	NA
4930524C18Rik	NA	NA	NA	NA	NA	NA	NA	NA	NA
4930524N10Rik	NA	NA	NA	NA	NA	NA	NA	NA	NA
4930524O05Rik	NA	NA	NA	NA	NA	NA	NA	NA	NA
4930524O08Rik	NA	NA	NA	NA	NA	NA	NA	NA	NA
4930525C09Rik	NA	NA	NA	NA	NA	NA	NA	NA	NA
4930525D18Rik	NA	NA	NA	NA	NA	NA	2.4	NA	NA
4930525G20Rik	NA	NA	NA	NA	NA	-1.28	NA	NA	NA
4930526F13Rik	NA	NA	NA	NA	NA	NA	NA	NA	NA
4930526H09Rik	NA	NA	NA	NA	NA	NA	NA	NA	NA
4930526I15Rik	NA	NA	NA	NA	NA	NA	NA	NA	NA
4930526L06Rik	NA	NA	NA	NA	NA	NA	NA	NA	NA
4930527F14Rik	NA	NA	NA	NA	NA	NA	NA	NA	NA
4930527G23Rik	NA	NA	NA	NA	NA	NA	NA	NA	NA
4930528A17Rik	NA	NA	NA	NA	NA	NA	NA	NA	NA
4930528D03Rik	NA	NA	NA	NA	NA	NA	NA	NA	NA
4930528G23Rik	NA	NA	NA	NA	NA	NA	NA	NA	NA
4930528H21Rik	NA	NA	NA	NA	NA	NA	NA	NA	NA
4930528P14Rik	NA	NA	NA	NA	NA	NA	NA	NA	NA
4930529C04Rik	NA	NA	NA	NA	NA	NA	NA	NA	NA
4930529K09Rik	NA	NA	NA	NA	NA	NA	NA	NA	NA
4930529L06Rik	NA	NA	NA	NA	NA	NA	NA	NA	NA
4930529N20Rik	NA	NA	NA	NA	NA	NA	NA	NA	NA
4930532I03Rik	NA	NA	NA	NA	NA	NA	NA	NA	NA
4930532M18Rik	NA	NA	NA	NA	NA	NA	NA	NA	NA
4930533B01Rik	NA	NA	NA	NA	NA	NA	NA	NA	NA
4930533I22Rik	NA	NA	NA	NA	NA	NA	NA	NA	NA
4930533K18Rik	NA	NA	NA	NA	NA	NA	NA	NA	NA
4930533N22Rik	NA	NA	NA	NA	NA	NA	1.02	NA	NA
4930533P14Rik	NA	NA	NA	NA	NA	NA	NA	NA	NA
4930535L15Rik	NA	NA	NA	NA	NA	NA	NA	NA	NA
4930535O05Rik	NA	NA	NA	NA	NA	NA	NA	NA	NA
4930538E20Rik	NA	NA	NA	NA	NA	NA	NA	NA	NA
4930538K18Rik	NA	NA	NA	NA	NA	NA	NA	NA	NA
4930538L07Rik	NA	NA	NA	NA	NA	NA	NA	NA	NA
4930539C22Rik	NA	NA	NA	NA	NA	NA	NA	NA	NA
4930539E08Rik	1.13	NA	NA	NA	NA	NA	NA	NA	NA
4930539J05Rik	NA	NA	NA	NA	NA	NA	NA	NA	NA
4930539M17Rik	NA	NA	NA	NA	NA	NA	NA	NA	NA
4930539N22Rik	NA	NA	NA	NA	NA	NA	NA	NA	NA
4930540M03Rik	NA	NA	NA	NA	NA	NA	NA	NA	NA
4930542C21Rik	NA	NA	NA	NA	NA	NA	NA	NA	NA
4930542D17Rik	1.74	NA	NA	NA	NA	3.61	2.99	NA	NA
4930542M03Rik	NA	NA	NA	NA	NA	NA	NA	NA	NA
4930542N06Rik	NA	NA	NA	NA	NA	NA	NA	NA	NA
4930543D07Rik	NA	NA	NA	NA	NA	NA	NA	NA	NA
4930543E12Rik	NA	NA	NA	NA	NA	NA	NA	NA	NA
4930543I03Rik	NA	NA	NA	NA	NA	NA	NA	NA	NA
4930543N07Rik	NA	NA	NA	NA	NA	NA	NA	NA	NA
4930544D05Rik	NA	NA	NA	NA	NA	NA	NA	NA	NA
4930544G11Rik	NA	NA	NA	NA	NA	NA	NA	NA	NA
4930544M13Rik	NA	NA	NA	NA	NA	NA	NA	NA	NA
4930545E07Rik	NA	NA	NA	NA	NA	NA	NA	NA	NA
4930545H06Rik	NA	NA	NA	NA	NA	NA	2.45	NA	NA
4930545L08Rik	NA	NA	NA	NA	NA	NA	NA	NA	NA
4930545L23Rik	NA	NA	NA	NA	NA	NA	NA	NA	NA
4930546C10Rik	NA	NA	NA	NA	NA	NA	NA	NA	NA
4930546K05Rik	NA	NA	NA	NA	NA	NA	NA	NA	NA
4930547E08Rik	NA	NA	NA	NA	NA	NA	NA	NA	NA
4930547E14Rik	NA	NA	NA	NA	NA	NA	NA	NA	NA
4930547H16Rik	NA	NA	NA	NA	NA	NA	NA	NA	NA
4930547M16Rik	NA	NA	NA	NA	NA	NA	NA	NA	NA
4930548G14Rik	NA	NA	NA	NA	NA	2.69	2.53	NA	NA
4930548H24Rik	NA	NA	NA	NA	NA	NA	NA	NA	NA
4930548J01Rik	NA	NA	NA	NA	NA	NA	NA	NA	NA
4930548K13Rik	NA	NA	NA	NA	NA	NA	NA	NA	NA
4930549C01Rik	NA	NA	NA	NA	NA	NA	NA	NA	NA
4930549C15Rik	NA	NA	NA	NA	NA	NA	NA	NA	NA
4930549G23Rik	-1.09	NA	NA	NA	NA	NA	NA	NA	NA
4930550C14Rik	NA	NA	NA	NA	NA	NA	NA	NA	NA
4930550C17Rik	NA	NA	NA	NA	NA	NA	NA	NA	NA
4930550L24Rik	NA	NA	NA	NA	2.63	NA	2.53	NA	NA
4930552N02Rik	NA	NA	NA	NA	NA	NA	NA	NA	NA
4930552P12Rik	1.06	1.05	NA	NA	NA	NA	NA	NA	NA
4930553C11Rik	NA	NA	NA	NA	NA	NA	NA	NA	NA
4930553E22Rik	NA	NA	NA	NA	NA	NA	NA	NA	NA
4930553J12Rik	NA	NA	NA	NA	NA	NA	2.7	NA	NA
4930553P18Rik	NA	NA	NA	NA	NA	NA	NA	NA	NA
4930554C24Rik	NA	NA	NA	NA	NA	NA	NA	NA	NA
4930554G24Rik	NA	NA	NA	NA	NA	NA	NA	NA	NA
4930554H23Rik	NA	NA	NA	NA	NA	NA	NA	NA	NA
4930554I06Rik	NA	NA	NA	NA	NA	NA	NA	NA	NA
4930555A03Rik	NA	NA	NA	NA	NA	NA	NA	NA	NA
4930555B11Rik	NA	NA	NA	NA	NA	NA	NA	NA	NA
4930555B12Rik	NA	NA	NA	NA	NA	NA	NA	NA	NA
4930555F03Rik	NA	NA	NA	NA	NA	NA	NA	NA	NA
4930555G01Rik	NA	NA	NA	NA	NA	NA	NA	NA	NA
4930555G21Rik	NA	NA	NA	NA	NA	NA	NA	NA	NA
4930555K05Rik	NA	NA	NA	NA	NA	NA	NA	NA	NA
4930555M17Rik	NA	NA	NA	NA	NA	NA	NA	NA	NA
4930556C24Rik	NA	NA	NA	NA	NA	NA	NA	NA	NA
4930556G01Rik	NA	NA	NA	NA	NA	NA	3.13	NA	NA
4930556J02Rik	NA	NA	NA	NA	NA	NA	NA	NA	NA
4930556L07Rik	NA	NA	NA	NA	NA	NA	NA	NA	NA
4930556M19Rik	NA	NA	NA	NA	NA	NA	NA	NA	NA
4930556N09Rik	NA	NA	NA	NA	NA	NA	NA	NA	NA
4930556N13Rik	NA	NA	NA	NA	NA	NA	NA	NA	NA
4930557B15Rik	NA	NA	NA	NA	NA	NA	NA	NA	NA
4930557F10Rik	NA	NA	NA	NA	NA	NA	NA	NA	NA
4930557J02Rik	NA	NA	NA	NA	NA	NA	NA	NA	NA
4930557K07Rik	NA	NA	NA	NA	NA	NA	-1.86	NA	NA
4930558C23Rik	NA	NA	NA	2.07	NA	NA	NA	NA	NA
4930558F17Rik	NA	NA	NA	NA	NA	NA	NA	NA	NA
4930558G05Rik	NA	NA	NA	NA	NA	NA	NA	NA	NA
4930558J18Rik	NA	NA	NA	NA	NA	NA	NA	NA	NA
4930558K02Rik	NA	3.41	NA	NA	NA	NA	NA	NA	NA
4930559C10Rik	NA	NA	NA	NA	NA	NA	NA	NA	NA
4930562C15Rik	NA	NA	NA	NA	NA	NA	NA	NA	NA
4930562F07Rik	NA	NA	NA	NA	NA	NA	NA	NA	NA
4930562F17Rik	NA	NA	NA	NA	NA	4.89	4.83	NA	NA
4930563D23Rik	3.73	3.99	NA	NA	NA	NA	NA	NA	NA
4930563E18Rik	NA	NA	NA	NA	-2.72	NA	NA	NA	NA
4930563E22Rik	NA	NA	NA	NA	-1.23	NA	NA	NA	NA
4930563F08Rik	NA	NA	NA	NA	NA	NA	NA	NA	NA
4930563H07Rik	NA	NA	NA	NA	NA	NA	NA	NA	NA
4930563I02Rik	NA	NA	NA	NA	3.83	NA	NA	NA	NA
4930563M20Rik	NA	NA	NA	NA	NA	NA	NA	NA	NA
4930563M21Rik	NA	NA	NA	NA	NA	NA	NA	NA	NA
4930564C03Rik	NA	NA	NA	NA	NA	NA	NA	NA	NA
4930564D02Rik	NA	NA	NA	NA	NA	NA	NA	NA	NA
4930565D16Rik	NA	NA	NA	NA	NA	NA	NA	NA	NA
4930565N06Rik	NA	NA	NA	NA	NA	NA	NA	NA	NA
4930567H12Rik	NA	NA	NA	NA	NA	NA	NA	NA	NA
4930567H17Rik	NA	NA	NA	NA	NA	NA	NA	NA	NA
4930567J20Rik	NA	NA	NA	NA	NA	NA	NA	NA	NA
4930567K12Rik	NA	NA	NA	NA	NA	NA	NA	NA	NA
4930567K20Rik	NA	NA	NA	NA	NA	NA	NA	NA	NA
4930568A12Rik	NA	NA	NA	NA	NA	NA	NA	NA	NA
4930568D16Rik	NA	NA	NA	NA	NA	NA	NA	NA	NA
4930568E12Rik	NA	NA	NA	NA	NA	NA	2.49	NA	NA
4930568G15Rik	NA	NA	NA	NA	NA	NA	NA	NA	NA
4930570E03Rik	NA	NA	NA	NA	NA	NA	NA	NA	NA
4930570G19Rik	NA	NA	NA	NA	NA	NA	NA	NA	NA
4930571K23Rik	NA	NA	NA	NA	NA	NA	NA	NA	NA
4930571O06Rik	NA	NA	NA	NA	NA	NA	NA	NA	NA
4930572G02Rik	NA	NA	NA	NA	NA	NA	NA	NA	NA
4930572K03Rik	NA	NA	NA	NA	NA	NA	NA	NA	NA
4930572O03Rik	NA	NA	NA	NA	NA	NA	NA	NA	NA
4930572O13Rik	NA	NA	NA	NA	NA	NA	NA	NA	NA
4930573C15Rik	NA	NA	NA	NA	NA	NA	NA	NA	NA
4930573H18Rik	NA	NA	NA	NA	NA	NA	NA	NA	NA
4930573O16Rik	2.85	3.15	NA	NA	NA	NA	NA	NA	NA
4930577N17Rik	NA	NA	NA	NA	NA	NA	NA	NA	NA
4930578C19Rik	NA	NA	NA	NA	NA	NA	NA	NA	NA
4930578E11Rik	NA	NA	NA	NA	NA	NA	NA	NA	NA
4930578G10Rik	NA	NA	NA	NA	NA	NA	NA	NA	NA
4930578I06Rik	NA	NA	NA	NA	NA	NA	NA	NA	NA
4930578M01Rik	NA	NA	NA	NA	NA	NA	NA	NA	NA
4930578N18Rik	NA	NA	NA	NA	NA	NA	NA	NA	NA
4930579C12Rik	NA	NA	NA	NA	NA	NA	NA	NA	NA
4930579D09Rik	NA	NA	NA	NA	NA	NA	NA	NA	NA
4930579F01Rik	NA	NA	NA	5.49	NA	4.49	5.09	NA	NA
4930579G18Rik	NA	NA	NA	NA	NA	NA	NA	NA	NA
4930579G24Rik	NA	NA	NA	NA	NA	NA	NA	NA	NA
4930579H20Rik	NA	NA	NA	NA	NA	NA	NA	NA	NA
4930579J19Rik	NA	NA	NA	NA	NA	NA	NA	NA	NA
4930579K19Rik	NA	NA	NA	NA	NA	NA	NA	NA	NA
4930579P08Rik	NA	NA	NA	NA	NA	NA	NA	NA	NA
4930581F22Rik	NA	NA	NA	NA	NA	NA	NA	NA	NA
4930583I09Rik	NA	NA	NA	NA	NA	NA	NA	NA	NA
4930583K01Rik	NA	NA	NA	NA	NA	NA	NA	NA	NA
4930583P06Rik	NA	NA	NA	NA	NA	NA	NA	NA	NA
4930584F24Rik	NA	NA	NA	NA	NA	4.23	4.26	NA	NA
4930586N03Rik	NA	NA	NA	NA	NA	NA	NA	NA	NA
4930587E11Rik	NA	NA	NA	NA	NA	NA	NA	NA	NA
4930588K23Rik	NA	NA	NA	NA	NA	NA	NA	NA	NA
4930589L23Rik	NA	NA	NA	NA	NA	NA	NA	NA	NA
4930590J08Rik	1.55	NA	NA	NA	NA	NA	NA	NA	NA
4930590L14Rik	NA	NA	NA	NA	NA	NA	NA	NA	NA
4930590L20Rik	NA	NA	NA	NA	NA	NA	NA	NA	NA
4930591A17Rik	NA	NA	NA	NA	NA	NA	NA	-2.96	NA
4930591E09Rik	NA	NA	NA	NA	NA	NA	NA	NA	NA
4930592A05Rik	NA	NA	NA	NA	NA	NA	NA	NA	NA
4930592C13Rik	NA	3.67	NA	NA	NA	NA	NA	NA	NA
4930592I03Rik	NA	1.74	NA	NA	NA	NA	NA	NA	NA
4930593A02Rik	NA	NA	NA	NA	NA	NA	NA	NA	NA
4930593C16Rik	NA	NA	NA	NA	NA	NA	NA	NA	NA
4930594C11Rik	NA	NA	NA	NA	NA	NA	NA	NA	NA
4930594O21Rik	NA	NA	NA	NA	NA	NA	NA	NA	NA
4930595D18Rik	NA	NA	NA	NA	NA	NA	NA	NA	NA
4930595L18Rik	NA	NA	NA	NA	NA	NA	NA	NA	NA
4930595M18Rik	NA	NA	NA	NA	NA	NA	NA	NA	NA
4930596D02Rik	NA	NA	NA	NA	NA	NA	NA	NA	NA
4930596I21Rik	NA	NA	NA	NA	NA	NA	NA	NA	NA
4930597A21Rik	NA	NA	NA	NA	NA	NA	NA	NA	NA
4930597G03Rik	NA	NA	NA	NA	NA	NA	NA	NA	NA
4930598F16Rik	NA	NA	NA	NA	NA	3.31	4.69	NA	NA
4930599N23Rik	NA	NA	NA	NA	NA	NA	NA	NA	NA
4931400O07Rik	NA	NA	NA	NA	NA	NA	NA	NA	NA
4931402G19Rik	NA	NA	NA	NA	NA	NA	NA	NA	NA
4931403E22Rik	NA	NA	NA	NA	NA	NA	NA	NA	NA
4931403G20Rik	NA	NA	NA	NA	NA	NA	NA	NA	NA
4931403M11Rik	NA	NA	NA	NA	NA	NA	NA	NA	NA
4931406B18Rik	NA	NA	NA	NA	NA	NA	NA	NA	NA
4931406C07Rik	NA	NA	NA	NA	NA	NA	NA	NA	NA
4931406H21Rik	NA	NA	NA	3.31	1.86	NA	NA	NA	NA
4931406P16Rik	NA	NA	NA	NA	NA	NA	NA	NA	NA
4931408C20Rik	NA	NA	NA	NA	NA	NA	NA	NA	NA
4931408D14Rik	NA	NA	NA	NA	NA	NA	NA	NA	NA
4931409K22Rik	2.57	1.71	NA	NA	NA	2.36	2.23	NA	NA
4931413K12Rik	NA	NA	NA	NA	NA	NA	NA	NA	NA
4931414P19Rik	NA	NA	NA	NA	NA	NA	NA	NA	NA
4931415C17Rik	NA	NA	NA	NA	NA	NA	NA	NA	NA
4931417E11Rik	NA	NA	NA	NA	NA	NA	NA	NA	NA
4931419H13Rik	NA	NA	NA	NA	NA	NA	NA	NA	NA
4931420L22Rik	NA	NA	NA	NA	NA	NA	NA	NA	NA
4931422A03Rik	NA	NA	NA	NA	NA	NA	NA	NA	NA
4931423N10Rik	1.35	1.54	NA	1.69	1.89	NA	NA	NA	NA
4931428F04Rik	NA	-1.19	NA	NA	NA	NA	NA	NA	NA
4931428L18Rik	NA	NA	NA	NA	NA	NA	NA	NA	NA
4931429L15Rik	NA	NA	NA	NA	NA	NA	NA	NA	NA
4931429P17Rik	NA	NA	NA	NA	NA	NA	NA	NA	NA
4931430N09Rik	NA	NA	NA	NA	NA	NA	NA	NA	NA
4931431B13Rik	NA	NA	NA	NA	NA	NA	NA	NA	NA
4931431C16Rik	3.39	3.42	NA	NA	NA	NA	NA	NA	NA
4931431F19Rik	NA	NA	NA	NA	NA	NA	NA	NA	NA
4931439C15Rik	NA	NA	NA	NA	NA	NA	NA	NA	NA
4931440F15Rik	1.99	NA	NA	NA	1.96	NA	NA	NA	NA
4931440J10Rik	NA	NA	NA	NA	NA	NA	NA	NA	NA
4931440P22Rik	NA	NA	NA	NA	NA	NA	NA	NA	NA
4932411N23Rik	NA	NA	NA	NA	NA	NA	NA	NA	NA
4932412D23Rik	NA	NA	2.71	3.61	NA	2.58	2.71	NA	NA
4932413F04Rik	NA	NA	NA	NA	NA	NA	NA	NA	NA
4932414J04Rik	NA	NA	NA	NA	NA	NA	NA	NA	NA
4932414N04Rik	NA	NA	NA	NA	NA	NA	NA	NA	NA
4932415M13Rik	NA	NA	NA	NA	NA	NA	NA	NA	NA
4932416H05Rik	NA	NA	NA	1.22	NA	NA	NA	NA	NA
4932416K20Rik	NA	NA	NA	NA	NA	NA	NA	NA	NA
4932429P05Rik	NA	NA	NA	NA	NA	NA	NA	NA	NA
4932431L22Rik	NA	NA	NA	NA	NA	NA	NA	NA	NA
4932431P20Rik	NA	3.81	NA	NA	NA	2.51	2.49	NA	NA
4932435O22Rik	NA	NA	NA	NA	NA	NA	NA	NA	NA
4932438A13Rik	NA	NA	NA	NA	NA	NA	NA	NA	NA
4932438H23Rik	NA	NA	NA	NA	NA	NA	NA	NA	NA
4932441J04Rik	NA	NA	NA	NA	NA	NA	NA	NA	NA
4932443I19Rik	NA	NA	NA	NA	NA	NA	NA	NA	NA
4932443L11Rik	NA	NA	NA	NA	NA	NA	NA	NA	NA
4932702P03Rik	NA	NA	NA	NA	NA	NA	NA	NA	NA
4933400A11Rik	NA	NA	NA	NA	NA	NA	NA	NA	NA
4933400B14Rik	NA	NA	NA	NA	NA	NA	NA	NA	NA
4933400C23Rik	NA	NA	NA	NA	NA	NA	NA	NA	NA
4933400F21Rik	NA	NA	NA	NA	NA	NA	NA	NA	NA
4933400L20Rik	NA	NA	NA	NA	NA	NA	NA	NA	NA
4933401B06Rik	NA	NA	NA	4.09	2.25	4.79	5.22	NA	NA
4933401D09Rik	NA	NA	NA	NA	NA	NA	1.52	NA	NA
4933401H06Rik	NA	NA	NA	-2.15	NA	NA	NA	NA	NA
4933402C05Rik	NA	NA	NA	NA	NA	6.44	8.06	NA	NA
4933402C06Rik	NA	1.23	NA	NA	NA	NA	NA	NA	NA
4933402D24Rik	NA	NA	NA	NA	NA	NA	NA	NA	NA
4933402E13Rik	3.18	2.24	NA	NA	NA	NA	NA	NA	NA
4933402J07Rik	1.5	2.26	NA	NA	NA	NA	NA	NA	NA
4933402J10Rik	NA	NA	NA	NA	NA	NA	NA	NA	NA
4933402J15Rik	NA	NA	NA	NA	NA	NA	NA	NA	NA
4933402N03Rik	NA	NA	NA	NA	NA	NA	NA	NA	NA
4933402N22Rik	NA	NA	NA	NA	NA	NA	NA	NA	NA
4933402P03Rik	NA	NA	NA	NA	NA	NA	NA	NA	NA
4933403O08Rik	NA	NA	NA	NA	NA	NA	3.62	NA	NA
4933404G15Rik	NA	NA	NA	NA	NA	NA	NA	NA	NA
4933404K08Rik	NA	NA	NA	NA	NA	NA	NA	NA	NA
4933404K13Rik	NA	NA	NA	NA	NA	NA	NA	NA	NA
4933404O12Rik	NA	NA	NA	NA	NA	NA	NA	NA	NA
4933405D12Rik	NA	NA	NA	NA	NA	NA	NA	NA	NA
4933405E24Rik	NA	NA	NA	NA	NA	NA	NA	NA	NA
4933405L10Rik	NA	NA	NA	NA	NA	NA	NA	-2.48	NA
4933405O20Rik	NA	NA	NA	NA	NA	NA	NA	NA	NA
4933406B17Rik	1.54	1.29	NA	NA	NA	NA	NA	NA	NA
4933406C10Rik	NA	NA	NA	NA	NA	NA	NA	NA	NA
4933406D12Rik	NA	NA	NA	NA	NA	NA	NA	NA	NA
4933406F09Rik	NA	NA	NA	NA	NA	NA	NA	NA	NA
4933406G16Rik	NA	NA	NA	NA	NA	NA	NA	NA	NA
4933406I18Rik	NA	NA	NA	NA	NA	NA	NA	NA	NA
4933406J10Rik	NA	-1.24	NA	NA	NA	NA	NA	NA	NA
4933406K04Rik	NA	NA	NA	NA	NA	NA	NA	NA	NA
4933406M09Rik	NA	-1.46	NA	NA	NA	NA	NA	NA	NA
4933407E24Rik	NA	NA	NA	NA	NA	NA	NA	NA	NA
4933407G14Rik	NA	NA	NA	NA	NA	NA	NA	NA	NA
4933407I05Rik	NA	NA	NA	NA	NA	NA	NA	NA	NA
4933407K13Rik	NA	NA	NA	NA	NA	NA	NA	NA	NA
4933407L21Rik	NA	NA	NA	NA	NA	NA	NA	NA	NA
4933408B17Rik	NA	NA	NA	NA	NA	NA	NA	NA	NA
4933408J17Rik	NA	NA	NA	NA	NA	NA	NA	NA	NA
4933408N05Rik	NA	NA	NA	NA	NA	NA	1.24	NA	NA
4933409F18Rik	NA	NA	NA	NA	NA	NA	NA	NA	NA
4933409G03Rik	NA	NA	NA	NA	NA	NA	NA	NA	NA
4933409K07Rik	NA	NA	NA	NA	NA	NA	NA	5.66	NA
4933411E08Rik	NA	NA	NA	NA	NA	NA	NA	NA	NA
4933411G06Rik	NA	NA	NA	NA	NA	NA	NA	NA	NA
4933411K16Rik	NA	NA	NA	NA	NA	NA	NA	NA	NA
4933412E12Rik	NA	NA	NA	NA	NA	NA	NA	NA	NA
4933412E24Rik	NA	NA	NA	NA	NA	NA	NA	NA	NA
4933412O06Rik	NA	NA	NA	NA	NA	NA	NA	NA	NA
4933413G19Rik	NA	NA	NA	NA	NA	NA	NA	NA	NA
4933413J09Rik	1.55	NA	NA	NA	NA	NA	NA	NA	NA
4933413L06Rik	NA	NA	NA	NA	NA	NA	NA	NA	NA
4933414I15Rik	NA	NA	NA	NA	NA	NA	NA	NA	NA
4933415F23Rik	NA	NA	NA	NA	NA	NA	NA	NA	NA
4933416C03Rik	NA	NA	NA	2.25	1.62	NA	NA	NA	NA
4933416E03Rik	NA	NA	NA	NA	NA	NA	NA	NA	NA
4933416I08Rik	NA	NA	NA	NA	NA	2.56	NA	NA	NA
4933416M06Rik	NA	NA	NA	NA	NA	NA	NA	NA	NA
4933416M07Rik	NA	NA	NA	NA	-1.58	NA	NA	NA	NA
4933416O17Rik	NA	NA	NA	NA	NA	NA	NA	NA	NA
4933417A18Rik	NA	NA	NA	NA	NA	NA	NA	NA	NA
4933417D19Rik	NA	NA	NA	NA	NA	NA	NA	NA	NA
4933417E11Rik	NA	NA	NA	NA	NA	NA	NA	NA	NA
4933417G07Rik	NA	NA	NA	NA	NA	NA	NA	NA	NA
4933417O13Rik	NA	NA	NA	NA	NA	NA	NA	NA	NA
4933421I07Rik	NA	NA	NA	NA	NA	NA	NA	NA	NA
4933421O10Rik	NA	NA	NA	NA	NA	NA	1.1	NA	NA
4933422A05Rik	NA	NA	NA	NA	NA	NA	NA	NA	NA
4933423P22Rik	NA	NA	NA	NA	NA	NA	NA	NA	NA
4933424G05Rik	NA	NA	NA	NA	NA	NA	NA	NA	NA
4933424G06Rik	NA	NA	NA	NA	NA	NA	NA	NA	NA
4933424M12Rik	NA	NA	NA	NA	NA	NA	NA	NA	NA
4933425B07Rik	NA	NA	NA	NA	NA	NA	NA	NA	NA
4933425L06Rik	NA	NA	NA	NA	NA	NA	NA	NA	NA
4933427D06Rik	NA	NA	NA	1.67	NA	1.72	1.36	NA	NA
4933427D14Rik	NA	NA	NA	NA	NA	NA	NA	NA	NA
4933427E11Rik	NA	NA	NA	NA	NA	NA	NA	NA	NA
4933427E13Rik	NA	NA	NA	NA	NA	NA	NA	NA	NA
4933427G17Rik	NA	NA	NA	NA	NA	NA	NA	NA	NA
4933427G23Rik	NA	NA	NA	NA	NA	NA	NA	NA	NA
4933427I22Rik	NA	NA	NA	NA	NA	NA	NA	NA	NA
4933428C19Rik	NA	NA	NA	NA	NA	NA	NA	NA	NA
4933428G20Rik	NA	NA	NA	NA	NA	NA	NA	NA	NA
4933428M09Rik	NA	NA	NA	NA	NA	NA	NA	NA	NA
4933429K18Rik	NA	NA	NA	NA	NA	NA	NA	NA	NA
4933429O19Rik	NA	2.56	NA	NA	NA	NA	NA	NA	NA
4933430H16Rik	NA	NA	NA	NA	NA	NA	NA	NA	NA
4933430I17Rik	1.04	1.08	NA	NA	NA	NA	NA	NA	NA
4933430M04Rik	NA	NA	NA	NA	NA	NA	NA	NA	NA
4933430N04Rik	NA	NA	NA	NA	NA	NA	NA	NA	NA
4933431E20Rik	NA	NA	NA	NA	NA	NA	NA	NA	NA
4933431G14Rik	NA	NA	NA	NA	NA	NA	NA	NA	NA
4933431J24Rik	NA	NA	NA	NA	NA	NA	NA	NA	NA
4933431K23Rik	NA	NA	NA	NA	NA	NA	NA	NA	NA
4933432G23Rik	NA	NA	NA	NA	NA	-2.57	NA	NA	NA
4933432I03Rik	NA	NA	NA	NA	NA	NA	NA	NA	NA
4933432I09Rik	NA	NA	NA	NA	NA	NA	NA	NA	NA
4933432K03Rik	NA	NA	NA	NA	NA	NA	NA	NA	NA
4933433F19Rik	NA	NA	NA	NA	NA	NA	NA	NA	NA
4933433G08Rik	NA	NA	NA	NA	NA	NA	NA	NA	NA
4933433G15Rik	NA	NA	NA	NA	NA	NA	NA	NA	NA
4933433G19Rik	NA	NA	NA	NA	NA	NA	NA	NA	NA
4933433H22Rik	NA	NA	NA	NA	NA	NA	NA	NA	NA
4933433N18Rik	NA	NA	NA	NA	NA	NA	NA	NA	NA
4933434E20Rik	NA	NA	NA	NA	NA	NA	NA	NA	NA
4933436E23Rik	NA	NA	NA	NA	NA	NA	NA	NA	NA
4933436H12Rik	NA	NA	NA	NA	NA	NA	NA	NA	NA
4933436I01Rik	NA	NA	NA	NA	NA	NA	NA	NA	NA
4933438B17Rik	NA	NA	NA	NA	NA	2.55	3.17	NA	NA
4933438K21Rik	NA	NA	NA	NA	NA	NA	NA	NA	NA
4933439C10Rik	NA	NA	NA	NA	NA	NA	NA	NA	NA
4933439K11Rik	NA	NA	NA	NA	NA	NA	NA	NA	NA
4933440J02Rik	NA	NA	NA	NA	NA	NA	NA	NA	NA
4933440M02Rik	NA	NA	NA	NA	NA	NA	NA	NA	NA
4933440N22Rik	NA	-1.09	NA	NA	NA	NA	NA	NA	NA
5031410I06Rik	NA	NA	NA	4.3	NA	6.99	6.07	NA	NA
5031414D18Rik	NA	NA	NA	NA	NA	4.58	4.64	NA	NA
5031425E22Rik	NA	NA	NA	NA	NA	NA	NA	NA	NA
5031425F14Rik	NA	NA	NA	NA	NA	NA	NA	NA	NA
5031426D15Rik	NA	NA	NA	NA	NA	NA	1.29	NA	NA
5031434C07Rik	NA	NA	NA	NA	NA	NA	NA	NA	NA
5031434O11Rik	NA	NA	NA	NA	NA	NA	NA	NA	NA
5031439G07Rik	NA	NA	NA	NA	NA	NA	NA	NA	NA
5033403F01Rik	NA	NA	NA	NA	NA	NA	NA	NA	NA
5033403H07Rik	NA	NA	NA	NA	NA	NA	NA	NA	NA
5033404E19Rik	1.88	1.84	NA	NA	NA	NA	NA	NA	NA
5033406O09Rik	1.95	1.53	NA	NA	1.18	NA	NA	NA	NA
5033417F24Rik	NA	NA	NA	NA	NA	NA	NA	NA	NA
5033421B08Rik	NA	NA	NA	NA	NA	NA	NA	NA	NA
5033426O07Rik	NA	NA	NA	NA	NA	NA	NA	NA	NA
5033428I22Rik	NA	NA	NA	NA	NA	NA	NA	NA	NA
5033430I15Rik	NA	NA	NA	NA	NA	NA	3.03	NA	NA
5330411J11Rik	NA	NA	NA	NA	NA	NA	NA	NA	NA
5330413P13Rik	NA	NA	NA	NA	NA	NA	NA	NA	NA
5330416C01Rik	NA	NA	NA	2.92	NA	2.77	3.04	NA	NA
5330417C22Rik	1.84	2.93	NA	NA	NA	2.02	2.58	NA	NA
5330432E05Rik	NA	1.07	NA	NA	NA	NA	NA	NA	NA
5330434G04Rik	NA	NA	NA	NA	NA	NA	NA	NA	NA
5330439A09Rik	NA	NA	NA	NA	NA	NA	NA	NA	NA
5330439B14Rik	NA	NA	NA	NA	NA	NA	NA	NA	NA
5430401F13Rik	NA	NA	NA	NA	NA	NA	3.18	NA	NA
5430401H09Rik	NA	NA	NA	NA	NA	NA	NA	NA	NA
5430402E10Rik	NA	NA	NA	NA	NA	NA	NA	NA	NA
5430402O13Rik	NA	NA	NA	6.88	NA	3.74	4.32	NA	2.74
5430403N17Rik	NA	NA	NA	NA	NA	NA	3.17	NA	NA
5430405H02Rik	NA	NA	NA	NA	NA	NA	NA	NA	NA
5430416N02Rik	NA	1.71	NA	NA	NA	NA	NA	NA	NA
5430416O09Rik	NA	NA	NA	NA	-2.04	NA	NA	-2.5	NA
5430419D17Rik	NA	NA	NA	NA	NA	NA	3.62	NA	NA
5430421F17Rik	NA	NA	NA	NA	NA	1.61	NA	NA	NA
5430425K12Rik	NA	NA	NA	NA	NA	NA	NA	NA	NA
5430427M07Rik	NA	NA	NA	NA	2.49	NA	NA	NA	NA
5430427O19Rik	NA	NA	NA	NA	1.18	NA	NA	NA	NA
5430428K19Rik	NA	NA	NA	NA	NA	NA	NA	NA	NA
5430431A17Rik	NA	NA	NA	NA	NA	NA	NA	-2.48	NA
5430434I15Rik	NA	NA	NA	NA	NA	NA	2.98	NA	NA
5430435K18Rik	NA	NA	NA	NA	NA	NA	NA	NA	NA
5430437J10Rik	NA	NA	NA	NA	NA	NA	NA	NA	NA
5430440P10Rik	NA	NA	NA	NA	1.73	NA	NA	NA	NA
5530400C23Rik	NA	NA	NA	NA	NA	NA	NA	NA	NA
5530401A14Rik	NA	NA	NA	NA	NA	NA	NA	NA	NA
5530601H04Rik	NA	NA	NA	NA	NA	NA	NA	NA	NA
5730403I07Rik	NA	NA	NA	NA	NA	NA	NA	NA	NA
5730405O15Rik	NA	NA	NA	NA	NA	NA	NA	NA	NA
5730408K05Rik	NA	NA	NA	NA	NA	NA	NA	NA	NA
5730409E04Rik	NA	NA	NA	NA	NA	NA	NA	NA	NA
5730409K12Rik	NA	NA	NA	NA	NA	NA	1.8	NA	NA
5730412P04Rik	NA	NA	NA	NA	NA	NA	NA	NA	NA
5730416F02Rik	NA	NA	NA	NA	NA	NA	NA	NA	NA
5730419F03Rik	NA	NA	NA	NA	NA	NA	NA	NA	NA
5730420D15Rik	NA	NA	NA	NA	NA	NA	NA	NA	NA
5730422E09Rik	NA	1.5	NA	NA	NA	NA	NA	NA	NA
5730435O14Rik	NA	NA	NA	NA	NA	NA	NA	NA	NA
5730455P16Rik	NA	NA	NA	NA	NA	NA	NA	NA	NA
5730460C07Rik	NA	NA	NA	NA	NA	NA	NA	NA	NA
5730480H06Rik	NA	NA	NA	NA	NA	NA	NA	NA	NA
5730488B01Rik	NA	NA	NA	NA	NA	NA	NA	NA	NA
5730507C01Rik	NA	NA	NA	NA	NA	NA	NA	NA	NA
5730508B09Rik	NA	NA	NA	NA	NA	NA	NA	NA	NA
5730522E02Rik	NA	NA	NA	NA	NA	2.57	2.89	NA	NA
5730559C18Rik	NA	NA	NA	NA	NA	NA	NA	NA	NA
5730596B20Rik	NA	3.9	NA	NA	NA	NA	NA	NA	NA
5830403F22Rik	NA	NA	NA	NA	NA	NA	1.25	NA	NA
5830411N06Rik	NA	NA	NA	NA	NA	NA	NA	NA	NA
5830416I19Rik	NA	NA	NA	NA	-2.21	NA	NA	NA	NA
5830417I10Rik	NA	NA	NA	NA	NA	NA	NA	NA	NA
5830418P13Rik	2.58	3.45	NA	NA	2.09	1.76	2.77	NA	NA
5830428M24Rik	2.5	3.4	NA	NA	NA	NA	NA	-2.48	NA
5830432E09Rik	2.88	NA	NA	NA	NA	NA	NA	NA	NA
5830444B04Rik	NA	NA	NA	NA	NA	NA	NA	NA	NA
5830454E08Rik	NA	NA	NA	NA	NA	NA	NA	NA	NA
5830473C10Rik	NA	NA	NA	NA	NA	2.85	3.98	NA	NA
5930403L14Rik	NA	NA	NA	NA	1.05	NA	NA	NA	NA
5930403N24Rik	NA	NA	NA	NA	NA	NA	NA	NA	NA
5930412G12Rik	NA	NA	NA	NA	NA	NA	NA	NA	NA
5930430L01Rik	NA	NA	NA	NA	NA	NA	1.1	NA	NA
5930438M14Rik	NA	NA	NA	NA	NA	NA	3.88	NA	NA
6030407O03Rik	NA	NA	NA	5.78	3.5	2.81	3.54	NA	3.21
6030408B16Rik	NA	NA	NA	NA	NA	NA	1.3	NA	NA
6030419C18Rik	NA	NA	NA	NA	NA	NA	NA	NA	NA
6030426L16Rik	NA	NA	NA	NA	NA	NA	NA	NA	NA
6030440G07Rik	NA	NA	NA	NA	NA	NA	NA	NA	NA
6030443J06Rik	NA	NA	NA	NA	NA	NA	NA	NA	NA
6030458C11Rik	NA	NA	NA	NA	NA	NA	NA	NA	NA
6030466F02Rik	NA	2.94	NA	NA	NA	NA	NA	NA	NA
6030468B19Rik	NA	NA	NA	NA	NA	NA	NA	NA	NA
6030469F06Rik	NA	NA	NA	NA	NA	NA	NA	NA	NA
6030471H07Rik	NA	NA	NA	NA	NA	NA	NA	NA	NA
6030498E09Rik	NA	NA	NA	NA	NA	NA	NA	NA	NA
6230400D17Rik	NA	NA	NA	NA	NA	NA	NA	NA	NA
6330403K07Rik	NA	NA	NA	NA	NA	2.43	2.52	NA	NA
6330407A03Rik	NA	NA	NA	NA	NA	NA	NA	NA	NA
6330408A02Rik	NA	NA	NA	NA	NA	NA	NA	NA	NA
6330409D20Rik	NA	NA	NA	NA	NA	NA	NA	NA	NA
6330410L21Rik	NA	NA	NA	NA	1.43	NA	NA	NA	NA
6330415B21Rik	NA	NA	NA	NA	NA	NA	NA	NA	NA
6330415G19Rik	NA	NA	NA	NA	NA	NA	NA	NA	NA
6330416G13Rik	NA	NA	NA	NA	NA	NA	NA	NA	NA
6330418K02Rik	NA	NA	NA	NA	NA	NA	NA	NA	NA
6330420H09Rik	NA	NA	NA	NA	NA	NA	NA	NA	NA
6330549D23Rik	NA	NA	NA	NA	NA	NA	NA	NA	NA
6430411K18Rik	NA	NA	NA	NA	-2	NA	NA	NA	NA
6430503K07Rik	2.3	3.69	NA	NA	NA	NA	NA	NA	NA
6430531B16Rik	2.17	2.74	NA	NA	1.17	NA	NA	NA	NA
6430548M08Rik	2.12	2.71	NA	NA	NA	1.73	NA	NA	NA
6430550D23Rik	NA	NA	NA	NA	NA	NA	NA	NA	NA
6430553K19Rik	NA	NA	NA	NA	NA	NA	NA	NA	NA
6430562O15Rik	NA	NA	NA	NA	NA	NA	NA	NA	NA
6430571L13Rik	NA	NA	NA	NA	NA	NA	NA	NA	NA
6430573F11Rik	NA	NA	NA	1.67	NA	NA	NA	NA	2.71
6430584L05Rik	NA	NA	NA	NA	NA	NA	2.65	NA	NA
6430590A07Rik	NA	NA	NA	NA	NA	NA	NA	NA	NA
6430590A10Rik	-1.5	-1.62	NA	NA	NA	NA	NA	NA	NA
6430628N08Rik	2.55	2.55	NA	NA	NA	NA	NA	NA	NA
6430706D22Rik	NA	NA	NA	NA	NA	NA	NA	NA	NA
6430710C18Rik	4.32	5.69	NA	NA	NA	2.83	2.83	NA	NA
6530402F18Rik	NA	NA	NA	NA	NA	NA	NA	NA	NA
6530403H02Rik	NA	NA	NA	NA	NA	NA	NA	NA	NA
6530411M01Rik	NA	NA	NA	NA	NA	NA	NA	NA	NA
6720432D03Rik	NA	NA	NA	NA	NA	NA	NA	NA	NA
6720468P15Rik	4.42	4.52	NA	NA	NA	NA	NA	NA	NA
6720483E21Rik	NA	NA	NA	NA	NA	NA	NA	NA	NA
6720489N17Rik	NA	NA	NA	NA	NA	NA	NA	NA	NA
6820408C15Rik	NA	NA	NA	NA	NA	NA	NA	NA	NA
6820426E19Rik	NA	NA	NA	NA	NA	NA	NA	NA	NA
6820431F20Rik	NA	NA	NA	NA	NA	NA	NA	NA	NA
7420426K07Rik	NA	NA	NA	3.28	NA	2.47	3.16	NA	NA
7420461P10Rik	NA	NA	NA	NA	NA	NA	NA	NA	NA
7420700N18Rik	NA	NA	NA	NA	NA	NA	NA	NA	NA
7420701I03Rik	NA	NA	NA	NA	NA	NA	NA	NA	NA
7530416G11Rik	NA	NA	NA	NA	NA	NA	NA	NA	NA
7530428D23Rik	NA	NA	NA	NA	NA	NA	NA	NA	NA
7630403G23Rik	NA	NA	NA	NA	NA	NA	NA	NA	NA
8030411F24Rik	4.09	3.5	NA	NA	NA	NA	NA	NA	NA
8030423F21Rik	NA	NA	NA	NA	NA	NA	NA	NA	NA
8030423J24Rik	NA	NA	NA	NA	NA	NA	NA	NA	NA
8030442B05Rik	NA	NA	NA	2.46	NA	NA	2.16	NA	NA
8030443G20Rik	NA	NA	NA	NA	NA	NA	NA	NA	NA
8030451A03Rik	NA	NA	NA	NA	NA	NA	NA	NA	NA
8030451O07Rik	NA	NA	NA	NA	NA	NA	NA	NA	NA
8030453O22Rik	NA	NA	NA	NA	NA	NA	NA	NA	NA
8030455M16Rik	1.53	NA	NA	NA	NA	NA	NA	NA	NA
8030462N17Rik	NA	NA	NA	NA	NA	NA	NA	NA	NA
8030474K03Rik	1.59	NA	NA	1.6	1.85	1.53	1.87	NA	NA
8430408G22Rik	NA	NA	NA	NA	NA	NA	NA	NA	NA
8430415O14Rik	NA	NA	NA	NA	NA	NA	NA	NA	NA
8430419K02Rik	NA	NA	NA	NA	NA	NA	NA	NA	NA
8430422H06Rik	NA	NA	NA	NA	NA	NA	NA	NA	NA
8430423G03Rik	NA	NA	NA	NA	NA	NA	NA	NA	NA
8430426J06Rik	NA	NA	NA	NA	NA	NA	NA	NA	NA
8430429K09Rik	NA	NA	NA	NA	-1.27	NA	NA	NA	NA
8430430B14Rik	NA	NA	NA	NA	NA	NA	NA	NA	NA
8430431K14Rik	NA	NA	NA	NA	NA	NA	NA	NA	NA
8430436N08Rik	NA	NA	NA	NA	NA	NA	NA	NA	NA
8430437L04Rik	NA	NA	NA	3.21	NA	NA	2.45	NA	NA
9030025P20Rik	NA	NA	NA	NA	NA	NA	NA	NA	NA
9030204H09Rik	NA	NA	NA	NA	NA	NA	2.46	NA	NA
9030404E10Rik	1.15	NA	NA	NA	NA	NA	NA	NA	NA
9030612E09Rik	NA	NA	NA	NA	NA	NA	NA	NA	NA
9030616G12Rik	NA	NA	NA	NA	NA	NA	NA	NA	NA
9030617O03Rik	NA	NA	NA	1.24	NA	1.29	1.46	NA	NA
9030619P08Rik	NA	NA	NA	NA	NA	NA	NA	NA	NA
9030622O22Rik	NA	3.57	NA	NA	NA	NA	NA	NA	NA
9030624G23Rik	NA	NA	NA	NA	NA	NA	NA	NA	NA
9030624J02Rik	NA	NA	NA	NA	NA	NA	NA	NA	NA
9030625G05Rik	NA	NA	NA	NA	NA	NA	1.25	NA	NA
9130001E16Rik	NA	2.63	NA	NA	NA	NA	NA	NA	NA
9130008F23Rik	1.22	1.06	NA	-1.7	NA	NA	NA	NA	NA
9130011E15Rik	NA	NA	NA	NA	NA	NA	NA	NA	NA
9130015A21Rik	NA	2.81	NA	NA	NA	NA	NA	NA	NA
9130015L21Rik	NA	NA	NA	NA	NA	NA	NA	NA	NA
9130019O22Rik	NA	NA	NA	NA	NA	NA	NA	NA	NA
9130019P16Rik	NA	NA	NA	NA	NA	NA	NA	NA	NA
9130023H24Rik	NA	NA	NA	NA	NA	NA	NA	NA	NA
9130024F11Rik	NA	NA	NA	NA	NA	NA	1.4	NA	NA
9130204L05Rik	-1.26	NA	NA	NA	NA	NA	NA	NA	NA
9130208D14Rik	NA	NA	NA	NA	NA	NA	NA	NA	NA
9130209A04Rik	NA	NA	NA	NA	NA	NA	NA	NA	NA
9130221F21Rik	NA	NA	NA	NA	NA	NA	NA	NA	NA
9130221H12Rik	NA	NA	NA	NA	NA	NA	NA	NA	NA
9130227L01Rik	NA	NA	NA	NA	NA	2.82	3.41	NA	NA
9130230L23Rik	2.61	3.21	NA	NA	NA	NA	NA	NA	NA
9130401M01Rik	NA	NA	NA	NA	NA	NA	NA	NA	NA
9130409I23Rik	NA	NA	NA	NA	NA	1.86	NA	NA	NA
9130409J20Rik	NA	NA	NA	NA	NA	NA	2.97	NA	NA
9230009I02Rik	NA	NA	NA	NA	NA	NA	NA	NA	NA
9230019H11Rik	NA	2.74	NA	NA	NA	NA	NA	NA	NA
9230020A06Rik	2.42	NA	NA	NA	NA	NA	2.49	NA	NA
9230102K24Rik	NA	NA	NA	2.44	NA	NA	3.69	NA	NA
9230102O04Rik	NA	NA	NA	NA	NA	NA	NA	NA	NA
9230104L09Rik	NA	NA	NA	NA	NA	NA	NA	NA	NA
9230105E05Rik	NA	NA	NA	NA	NA	NA	NA	NA	NA
9230110C19Rik	1.31	1.19	NA	NA	NA	NA	NA	NA	NA
9230110F15Rik	NA	NA	NA	NA	NA	NA	NA	NA	NA
9230112D13Rik	NA	NA	NA	NA	NA	NA	NA	NA	NA
9230112J17Rik	NA	NA	NA	NA	NA	NA	NA	-2.48	NA
9230113P08Rik	NA	NA	NA	NA	NA	NA	NA	NA	NA
9230114K14Rik	2	2.28	NA	NA	NA	NA	1.2	NA	NA
9230116L04Rik	NA	NA	NA	NA	NA	NA	NA	NA	NA
9230116N13Rik	NA	NA	NA	NA	NA	NA	NA	NA	NA
9230117E06Rik	NA	NA	NA	NA	NA	NA	NA	NA	NA
9330020H09Rik	NA	NA	NA	NA	NA	NA	NA	NA	NA
9330102E08Rik	NA	NA	NA	NA	NA	NA	NA	NA	NA
9330104G04Rik	NA	NA	NA	NA	NA	NA	NA	NA	NA
9330111N05Rik	NA	NA	NA	NA	NA	NA	NA	NA	NA
9330117O12Rik	NA	NA	NA	3.23	NA	NA	3.8	NA	NA
9330133O14Rik	NA	NA	NA	NA	NA	NA	NA	NA	NA
9330136K24Rik	NA	NA	NA	NA	NA	NA	NA	NA	NA
9330151L19Rik	NA	NA	NA	NA	NA	NA	NA	NA	NA
9330154J02Rik	NA	NA	NA	NA	NA	NA	NA	NA	NA
9330155M09Rik	NA	NA	NA	NA	NA	NA	NA	NA	NA
9330158H04Rik	NA	NA	NA	NA	NA	NA	NA	2.18	NA
9330159F19Rik	NA	NA	NA	NA	NA	NA	NA	NA	NA
9330159M07Rik	NA	NA	NA	NA	NA	NA	NA	NA	NA
9330162012Rik	NA	NA	NA	NA	NA	NA	NA	NA	NA
9330162B11Rik	NA	NA	NA	NA	NA	NA	NA	NA	NA
9330175E14Rik	NA	NA	NA	NA	-2.01	NA	NA	NA	NA
9330175M20Rik	NA	NA	NA	NA	NA	NA	NA	NA	NA
9330178D15Rik	NA	1.72	NA	NA	NA	NA	NA	NA	NA
9330179D12Rik	NA	NA	NA	NA	NA	NA	NA	NA	NA
9330182L06Rik	1.76	NA	NA	2.6	1.12	1.16	1	NA	NA
9330182O14Rik	3.64	2.01	NA	NA	NA	3.28	2.54	NA	NA
9330188P03Rik	1.88	2.12	NA	NA	NA	NA	NA	NA	NA
9330198I05Rik	NA	NA	NA	NA	NA	NA	NA	NA	NA
9330198N18Rik	NA	NA	NA	NA	NA	NA	NA	NA	NA
9330199G10Rik	NA	NA	NA	NA	NA	NA	NA	NA	NA
9430007A20Rik	NA	NA	NA	NA	NA	NA	NA	NA	NA
9430014N10Rik	NA	NA	NA	NA	NA	NA	NA	NA	NA
9430015G10Rik	NA	NA	NA	NA	NA	NA	NA	NA	NA
9430018G01Rik	NA	NA	NA	NA	NA	NA	NA	NA	NA
9430019J16Rik	NA	NA	NA	NA	NA	NA	NA	NA	NA
9430020K01Rik	NA	NA	NA	NA	NA	NA	NA	NA	NA
9430021M05Rik	NA	NA	NA	NA	NA	NA	NA	NA	NA
9430024E24Rik	NA	NA	NA	NA	NA	NA	NA	NA	NA
9430037G07Rik	NA	NA	NA	NA	NA	NA	NA	NA	NA
9430038I01Rik	NA	NA	NA	NA	NA	NA	NA	NA	NA
9430041J12Rik	NA	NA	NA	NA	NA	NA	NA	NA	NA
9430060I03Rik	NA	NA	NA	NA	NA	NA	NA	NA	NA
9430065F17Rik	NA	NA	NA	NA	NA	NA	NA	NA	NA
9430069I07Rik	NA	-2.37	NA	-2.69	NA	NA	NA	NA	NA
9430078K24Rik	NA	NA	NA	NA	NA	NA	NA	NA	NA
9430083A17Rik	NA	NA	NA	NA	NA	NA	NA	NA	NA
9430085M18Rik	NA	NA	NA	NA	NA	NA	NA	NA	NA
9430091E24Rik	NA	NA	NA	NA	NA	NA	NA	NA	NA
9430093N23Rik	NA	NA	NA	NA	NA	NA	NA	NA	NA
9430097D07Rik	1.13	NA	NA	NA	NA	NA	NA	NA	NA
9530002B09Rik	NA	NA	NA	NA	NA	NA	NA	NA	NA
9530003J23Rik	NA	NA	NA	NA	NA	NA	NA	NA	NA
9530014B07Rik	NA	NA	NA	NA	NA	NA	NA	NA	NA
9530020I12Rik	NA	NA	NA	NA	NA	NA	NA	NA	NA
9530026F06Rik	NA	NA	NA	NA	NA	NA	NA	NA	NA
9530026P05Rik	NA	NA	NA	NA	NA	NA	NA	NA	NA
9530027J09Rik	NA	NA	NA	NA	NA	NA	NA	NA	NA
9530034E10Rik	NA	NA	NA	NA	NA	NA	1.25	NA	NA
9530036M11Rik	NA	NA	NA	NA	NA	NA	NA	NA	NA
9530036O11Rik	NA	NA	NA	NA	NA	NA	NA	NA	NA
9530047P18Rik	NA	NA	NA	NA	NA	NA	NA	NA	NA
9530051G07Rik	NA	NA	NA	NA	NA	NA	NA	NA	NA
9530052C20Rik	NA	1.75	NA	NA	NA	NA	NA	NA	NA
9530052E02Rik	NA	NA	NA	NA	NA	NA	NA	NA	NA
9530053A07Rik	2.42	3.28	NA	NA	NA	1.53	1.92	NA	NA
9530057J20Rik	NA	3.37	NA	NA	1.35	1.86	2.38	NA	NA
9530059O14Rik	NA	NA	NA	NA	NA	NA	NA	NA	NA
9530062K07Rik	NA	NA	NA	NA	NA	NA	NA	NA	NA
9530068E07Rik	NA	NA	NA	NA	NA	NA	NA	NA	NA
9530077C05Rik	1.16	1.07	NA	NA	NA	NA	NA	NA	NA
9530080O11Rik	NA	NA	NA	NA	NA	NA	NA	NA	NA
9530082P21Rik	NA	NA	NA	NA	NA	NA	NA	NA	NA
9530091C08Rik	NA	NA	NA	NA	NA	NA	NA	NA	NA
9630001P10Rik	NA	NA	NA	NA	NA	NA	NA	NA	NA
9630002D21Rik	NA	NA	NA	NA	NA	NA	NA	NA	NA
9630013A20Rik	NA	NA	NA	NA	NA	NA	NA	NA	NA
9630013D21Rik	NA	NA	NA	NA	NA	NA	NA	NA	NA
9630013K17Rik	NA	NA	NA	NA	NA	NA	NA	NA	NA
9630015K15Rik	NA	NA	NA	NA	NA	NA	NA	NA	NA
9630028B13Rik	NA	NA	NA	NA	NA	NA	NA	NA	NA
9630028H03Rik	NA	NA	NA	NA	NA	NA	NA	NA	NA
9630028I04Rik	NA	NA	NA	NA	NA	NA	1.78	NA	NA
9830107B12Rik	NA	NA	NA	NA	NA	NA	1.99	NA	NA
9830132P13Rik	NA	NA	NA	NA	NA	NA	NA	NA	NA
9830147E19Rik	NA	NA	NA	NA	NA	NA	NA	NA	NA
9830166K06Rik	NA	NA	NA	2.05	NA	NA	NA	NA	NA
9930012K11Rik	NA	NA	NA	NA	NA	NA	NA	NA	NA
9930014A18Rik	-3.07	NA	NA	NA	-2.27	NA	NA	NA	NA
9930021J03Rik	NA	NA	NA	NA	NA	NA	NA	NA	NA
9930038B18Rik	2.24	2.58	NA	NA	NA	NA	NA	NA	NA
9930104L06Rik	NA	1.16	NA	NA	NA	NA	NA	NA	NA
9930111H07Rik	NA	NA	NA	NA	NA	NA	NA	NA	NA
9930111J21Rik1	NA	NA	NA	NA	NA	NA	1.31	NA	NA
9930111J21Rik2	NA	NA	NA	NA	NA	NA	NA	NA	NA
a	NA	NA	NA	NA	NA	NA	NA	NA	NA
A030001D20Rik	NA	NA	NA	NA	NA	NA	NA	NA	NA
A130010J15Rik	NA	NA	NA	NA	NA	NA	NA	NA	NA
A130030D18Rik	NA	NA	NA	NA	NA	NA	NA	NA	NA
A130051J06Rik	NA	NA	NA	NA	NA	NA	NA	NA	NA
A130077B15Rik	NA	NA	NA	NA	NA	NA	NA	NA	NA
A1bg	NA	NA	NA	NA	NA	NA	NA	NA	NA
A1cf	NA	NA	NA	NA	NA	NA	NA	NA	NA
A230001M10Rik	NA	NA	NA	NA	NA	NA	NA	NA	NA
A230006K03Rik	NA	NA	NA	NA	NA	NA	1.33	NA	NA
A230009B12Rik	NA	NA	NA	NA	NA	NA	NA	NA	NA
A230020J21Rik	NA	NA	NA	NA	-2.41	NA	NA	NA	NA
A230028O05Rik	NA	NA	NA	NA	NA	NA	NA	NA	NA
A230046K03Rik	NA	NA	NA	NA	NA	NA	1.24	NA	NA
A230050P20Rik	NA	NA	NA	-1.56	NA	NA	NA	-2.97	NA
A230051N06Rik	NA	NA	NA	NA	NA	NA	2.21	NA	NA
A230052G05Rik	NA	NA	NA	NA	NA	NA	NA	NA	NA
A230056J06Rik	NA	NA	NA	NA	NA	NA	NA	NA	NA
A230056P14Rik	NA	NA	NA	NA	NA	NA	NA	NA	NA
A230057D06Rik	NA	NA	NA	NA	NA	NA	NA	NA	NA
A230065H16Rik	NA	NA	NA	NA	NA	NA	NA	NA	NA
A230070E04Rik	-1.05	-1.13	NA	NA	NA	NA	NA	NA	NA
A230072C01Rik	NA	NA	NA	NA	NA	NA	NA	NA	NA
A230072E10Rik	NA	NA	NA	NA	NA	1.3	1.54	NA	NA
A230072I06Rik	NA	NA	NA	NA	NA	NA	NA	NA	NA
A230077H06Rik	NA	NA	NA	NA	NA	NA	NA	NA	NA
A230083G16Rik	NA	NA	NA	NA	NA	NA	NA	NA	NA
A230087F16Rik	NA	NA	NA	NA	NA	NA	NA	NA	NA
A230098N10Rik	NA	NA	2.5	NA	NA	1.4	2	NA	NA
A230103J11Rik	NA	NA	NA	NA	NA	NA	NA	NA	NA
A230103O09Rik	NA	NA	NA	NA	NA	NA	NA	NA	NA
A230107N01Rik	NA	NA	NA	NA	NA	NA	NA	NA	NA
A230108P19Rik	NA	NA	NA	NA	NA	NA	NA	NA	NA
A2m	-1.23	-1.89	NA	2.91	3.5	NA	NA	NA	NA
A330008L17Rik	NA	NA	NA	NA	NA	NA	NA	NA	NA
A330009N23Rik	NA	NA	NA	NA	NA	NA	NA	NA	NA
A330015K06Rik	NA	NA	NA	NA	NA	NA	NA	NA	NA
A330023F24Rik	NA	NA	NA	NA	NA	NA	NA	NA	NA
A330032B11Rik	NA	NA	NA	NA	NA	2.49	3.26	NA	NA
A330033J07Rik	NA	NA	NA	NA	NA	NA	NA	NA	NA
A330035P11Rik	NA	NA	NA	NA	NA	NA	NA	NA	NA
A330040F15Rik	NA	NA	NA	NA	NA	NA	NA	NA	NA
A330041J22Rik	NA	NA	NA	NA	NA	NA	NA	NA	NA
A330048O09Rik	NA	-1.26	NA	NA	NA	NA	NA	-2.96	NA
A330049N07Rik	NA	NA	NA	NA	NA	NA	NA	NA	NA
A330069E16Rik	NA	NA	NA	NA	NA	1.73	2.33	NA	NA
A330069K06Rik	NA	NA	NA	NA	NA	NA	NA	NA	NA
A330070K13Rik	NA	NA	NA	NA	NA	NA	NA	NA	NA
A330074K22Rik	2.16	NA	NA	NA	1.84	NA	NA	NA	NA
A330076C08Rik	NA	NA	NA	NA	NA	NA	NA	NA	NA
A330076H08Rik	NA	NA	NA	NA	NA	NA	2.98	NA	NA
A330093E20Rik	NA	NA	NA	NA	2.06	NA	NA	NA	NA
A330102I10Rik	NA	NA	NA	NA	NA	NA	NA	NA	NA
A3galt2	3.92	3.1	NA	NA	NA	NA	NA	NA	NA
A430005L14Rik	NA	NA	NA	NA	NA	NA	NA	NA	NA
A430010J10Rik	NA	NA	NA	3.05	NA	NA	NA	NA	NA
A430033K04Rik	NA	NA	NA	NA	NA	NA	NA	NA	NA
A430035B10Rik	NA	NA	NA	NA	NA	NA	NA	NA	NA
A430046D13Rik	NA	NA	NA	NA	NA	NA	1.13	NA	NA
A430048G15Rik	NA	NA	NA	NA	NA	NA	NA	NA	NA
A430057M04Rik	NA	NA	NA	NA	NA	NA	NA	NA	NA
A430060F13Rik	4.31	2.44	NA	5.36	5.63	5.16	5.46	NA	NA
A430072P03Rik	NA	NA	NA	NA	NA	NA	NA	NA	NA
A430078G23Rik	NA	NA	NA	NA	NA	NA	NA	6.91	NA
A430078I02Rik	NA	NA	NA	NA	NA	NA	NA	NA	NA
A430085M09Rik	NA	NA	NA	NA	NA	NA	1.26	NA	NA
A430088P11Rik	NA	NA	NA	NA	NA	NA	NA	NA	NA
A430089I19Rik	NA	NA	8.3	7.33	7.97	5.59	6.18	NA	3.08
A430090L17Rik	NA	NA	NA	NA	NA	NA	NA	NA	NA
A430093F15Rik	NA	NA	NA	NA	NA	NA	NA	NA	NA
A430105I19Rik	2.51	2.37	NA	NA	NA	NA	NA	2.87	NA
A430105J06Rik	NA	NA	NA	NA	-2.14	NA	NA	NA	NA
A430108G06Rik	NA	NA	NA	NA	-2.18	NA	NA	NA	NA
A430110L20Rik	NA	NA	NA	NA	NA	NA	NA	NA	NA
A4galt	NA	NA	NA	NA	NA	NA	NA	NA	NA
A4gnt	NA	NA	NA	NA	NA	NA	NA	NA	NA
A530001N23Rik	NA	NA	NA	NA	NA	NA	NA	NA	NA
A530006G24Rik	NA	NA	NA	NA	NA	NA	NA	NA	NA
A530010L16Rik	NA	NA	NA	NA	NA	NA	NA	NA	NA
A530013C23Rik	2.47	3.85	NA	NA	NA	NA	NA	NA	NA
A530016L24Rik	NA	NA	NA	NA	NA	NA	NA	NA	NA
A530020G20Rik	NA	2.09	NA	NA	NA	NA	NA	NA	NA
A530021J07Rik	NA	NA	NA	NA	NA	NA	NA	NA	NA
A530032D15Rik	NA	NA	5.03	5.19	NA	4.93	5.8	NA	3.46
A530040E14Rik	NA	NA	NA	4.12	2.43	4.03	5.18	NA	NA
A530046M15Rik	NA	NA	NA	NA	NA	NA	NA	NA	NA
A530050N04Rik	NA	NA	NA	NA	NA	NA	NA	NA	NA
A530053G22Rik	NA	NA	NA	NA	NA	NA	NA	NA	NA
A530058N18Rik	NA	NA	NA	NA	NA	NA	NA	NA	NA
A530064D06Rik	NA	NA	NA	NA	NA	NA	NA	NA	NA
A530065N20Rik	NA	NA	NA	NA	NA	NA	NA	NA	NA
A530072M11Rik	1.97	2.76	NA	NA	NA	NA	NA	NA	NA
A530088E08Rik	NA	-2.5	NA	NA	NA	NA	NA	NA	NA
A530095I07Rik	NA	NA	NA	NA	NA	NA	NA	NA	NA
A530099J19Rik	NA	NA	NA	NA	NA	NA	NA	NA	NA
A630001G21Rik	2.2	2.31	NA	NA	NA	NA	NA	NA	NA
A630001O12Rik	NA	2.82	NA	NA	NA	NA	NA	NA	NA
A630010A05Rik	NA	NA	NA	NA	NA	NA	NA	NA	NA
A630012P03Rik	NA	NA	NA	NA	NA	NA	NA	NA	NA
A630019I02Rik	NA	NA	NA	NA	NA	NA	NA	NA	NA
A630020A06	NA	NA	NA	NA	NA	NA	NA	NA	NA
A630023A22Rik	NA	NA	NA	NA	2.1	NA	NA	NA	NA
A630023P12Rik	NA	NA	NA	NA	NA	NA	NA	NA	NA
A630033H20Rik	NA	NA	NA	NA	NA	NA	NA	NA	NA
A630034I12Rik	NA	NA	NA	NA	NA	NA	NA	NA	NA
A630050E04Rik	NA	NA	NA	NA	NA	NA	NA	NA	NA
A630066F11Rik	NA	NA	NA	NA	NA	NA	NA	NA	NA
A630072L19Rik	NA	NA	NA	NA	NA	NA	NA	NA	NA
A630072M18Rik	NA	NA	NA	NA	NA	NA	NA	NA	NA
A630073D07Rik	NA	NA	NA	NA	NA	NA	NA	NA	NA
A630075F10Rik	NA	NA	NA	NA	NA	NA	NA	NA	NA
A630076J17Rik	NA	NA	NA	NA	NA	NA	NA	NA	NA
A630077J23Rik	NA	NA	NA	NA	NA	NA	NA	NA	NA
A630089N07Rik	NA	NA	NA	NA	NA	NA	NA	NA	NA
A630095E13Rik	NA	NA	NA	NA	NA	NA	NA	NA	NA
A630095N17Rik	1.2	1.08	NA	NA	NA	NA	NA	NA	NA
A730004F24Rik	NA	NA	NA	NA	NA	NA	NA	NA	NA
A730006G06Rik	NA	NA	NA	NA	NA	NA	NA	NA	NA
A730008H23Rik	NA	NA	NA	NA	NA	NA	NA	NA	NA
A730009L09Rik	NA	NA	NA	NA	NA	NA	NA	NA	NA
A730013G03Rik	NA	NA	NA	NA	NA	NA	NA	NA	NA
A730017C20Rik	NA	NA	NA	NA	NA	NA	NA	NA	NA
A730017L22Rik	NA	NA	NA	NA	NA	NA	NA	NA	NA
A730018C14Rik	NA	NA	NA	NA	NA	NA	NA	NA	NA
A730020E08Rik	NA	NA	NA	NA	NA	NA	NA	NA	NA
A730020M07Rik	NA	NA	NA	NA	NA	NA	NA	NA	NA
A730036I17Rik	NA	NA	NA	NA	NA	NA	NA	NA	NA
A730043L09Rik	NA	NA	NA	NA	NA	NA	NA	NA	NA
A730046J19Rik	NA	NA	NA	NA	NA	NA	NA	NA	NA
A730049H05Rik	1.14	NA	NA	NA	1.38	NA	NA	1.86	NA
A730056A06Rik	NA	NA	NA	NA	NA	NA	NA	NA	NA
A730082K24Rik	NA	NA	NA	NA	NA	NA	NA	NA	NA
A730085K08Rik	NA	NA	NA	NA	NA	NA	NA	NA	NA
A730089K16Rik	NA	NA	NA	NA	NA	NA	NA	NA	NA
A730090N16Rik	NA	NA	NA	NA	NA	NA	NA	NA	NA
A830005F24Rik	NA	NA	NA	NA	NA	NA	NA	NA	NA
A830009L08Rik	NA	NA	NA	NA	NA	NA	NA	NA	NA
A830010M20Rik	NA	NA	NA	NA	NA	NA	NA	NA	NA
A830011K09Rik	NA	NA	NA	NA	NA	NA	NA	NA	NA
A830012C17Rik	NA	NA	NA	NA	NA	NA	NA	NA	NA
A830018L16Rik	NA	NA	NA	NA	NA	NA	NA	NA	NA
A830019L24Rik	NA	NA	NA	NA	NA	NA	NA	NA	NA
A830019P07Rik	NA	NA	NA	NA	NA	NA	NA	NA	NA
A830021F12Rik	NA	NA	NA	NA	NA	NA	NA	NA	NA
A830021M18Rik	NA	NA	NA	NA	NA	NA	NA	NA	NA
A830029E22Rik	NA	NA	NA	NA	NA	NA	NA	NA	NA
A830035A12Rik	NA	NA	NA	NA	NA	NA	NA	NA	NA
A830035O19Rik	1.56	1.43	NA	NA	NA	NA	NA	NA	NA
A830052D11Rik	NA	NA	NA	NA	NA	NA	NA	NA	NA
A830080D01Rik	NA	NA	NA	NA	NA	NA	NA	NA	NA
A830082K12Rik	NA	NA	NA	NA	NA	NA	NA	NA	NA
A830082N09Rik	NA	NA	NA	NA	NA	NA	NA	NA	NA
A830092H15Rik	NA	NA	NA	NA	NA	NA	NA	NA	NA
A930001A20Rik	NA	NA	NA	NA	NA	NA	2.76	NA	NA
A930001C03Rik	NA	2.54	NA	NA	NA	NA	NA	NA	NA
A930002C04Rik	NA	NA	NA	NA	NA	NA	NA	NA	NA
A930003A15Rik	NA	NA	NA	NA	NA	NA	NA	NA	NA
A930003O13Rik	NA	NA	NA	NA	NA	NA	NA	NA	NA
A930004D18Rik	NA	NA	NA	NA	1.45	NA	NA	NA	NA
A930005H10Rik	NA	NA	NA	NA	NA	NA	NA	NA	NA
A930006I01Rik	NA	NA	NA	NA	NA	NA	NA	NA	NA
A930006K02Rik	2.03	2.27	NA	NA	NA	NA	NA	NA	NA
A930007A09Rik	NA	NA	NA	NA	1.02	NA	NA	NA	NA
A930007I19Rik	NA	NA	NA	NA	NA	NA	NA	NA	NA
A930009A15Rik	NA	NA	NA	NA	NA	NA	NA	NA	NA
A930011G23Rik	NA	NA	NA	NA	NA	NA	NA	NA	NA
A930012L18Rik	NA	NA	NA	NA	NA	NA	NA	NA	NA
[truncated: 34,171 more rows]
