# Supplementary material for: ATR expands embryonic stem cell fate potential in response to replication stress
Source: eLife. 2020 Mar 12;9:e54756. doi: 10.7554/eLife.54756 (PMC7067586; doi:10.7554/eLife.54756)
Supplement: Supplementary file 5. [file elife-54756-supp5.xlsx]

## Sheet: Sheet1
Supplementary Table 5. Comparison of DE retroelements in APH induced cells.
repeat_name	repeat_family	log2_fc	log2_mean	p_value	FDR	experiment
RLTR47_MM	LTR/ERV1	1.82769	2.16661	0.00039091	0.00467468	aphi_vs_ctrl
LTR53B	LTR/ERVL	1.12662	4.63802	7.23e-10	7.17e-08	aphi_vs_ctrl
MamGypLTR1a	LTR/Gypsy	1.07549	2.83941	0.000254052	0.00333589	aphi_vs_ctrl
RLTR9A3A	LTR/ERVK	1.02955	4.84871	1.58e-07	5.96e-06	aphi_vs_ctrl
MER110A	LTR/ERV1	0.913279	5.78576	4.15e-09	2.53e-07	aphi_vs_ctrl
LTR106_Mam	LTR	0.823845	2.99779	0.00229455	0.0195654	aphi_vs_ctrl
LTR16A1	LTR/ERVL	0.8057	5.10398	8.69e-06	0.000208872	aphi_vs_ctrl
LTR88b	LTR/Gypsy?	0.793485	4.21513	0.000451853	0.00511885	aphi_vs_ctrl
RLTR44D	LTR/ERVK	0.791164	4.87743	0.000306329	0.00379561	aphi_vs_ctrl
MamGypLTR3a	LTR/Gypsy	0.766499	3.91625	0.000949341	0.00952946	aphi_vs_ctrl
MER92	LTR/ERV1	0.753275	5.12699	1.51e-05	0.000342424	aphi_vs_ctrl
LTR88a	LTR/Gypsy?	0.740403	3.20857	0.00220113	0.0191652	aphi_vs_ctrl
MT2_Mm	LTR/ERVL-MaLR	0.687947	12.4464	4.17e-08	1.74e-06	aphi_vs_ctrl
MT2_Mm	LTR/ERVL	0.687947	12.4464	4.17e-08	1.74e-06	aphi_vs_ctrl
RLTR44	LTR/ERVK	0.66161	8.43921	6.32e-09	3.58e-07	aphi_vs_ctrl
LTRIS4A	LTR/ERV1	0.592191	6.71476	1.03e-07	4.09e-06	aphi_vs_ctrl
RLTR44A	LTR/ERVK	0.562293	6.04577	5.97e-06	0.000163254	aphi_vs_ctrl
ERV316A3_I	LTR/ERVL	0.554353	5.58645	0.000204382	0.00289419	aphi_vs_ctrl
MamRep1527	LTR	0.554307	3.75097	0.0042461	0.0311774	aphi_vs_ctrl
ERVB5_1I	LTR/ERVK	0.546409	4.67158	0.00728764	0.0481592	aphi_vs_ctrl
LTR33B	LTR/ERVL	0.516224	6.2884	6.52e-05	0.0011492	aphi_vs_ctrl
MLT1G	LTR/ERVL-MaLR	0.509136	7.22256	7.9e-06	0.000195734	aphi_vs_ctrl
RLTR44B	LTR/ERVK	0.483063	5.29688	0.000641564	0.00716564	aphi_vs_ctrl
MLT2C1	LTR/ERVL	0.476636	6.00506	6.51e-05	0.0011492	aphi_vs_ctrl
ETnERV3	LTR/ERVK	0.472172	9.07717	0.00363207	0.0276945	aphi_vs_ctrl
SRV_MM	LTR/ERVK	0.443552	6.99944	8.21e-05	0.0013283	aphi_vs_ctrl
LTR79	LTR/ERVL	0.440064	6.26519	0.000914101	0.00949036	aphi_vs_ctrl
RLTR31_Mur	LTR/ERVK	0.431581	6.31244	0.000167874	0.00246527	aphi_vs_ctrl
LTR82A	LTR/ERVL	0.426523	6.97091	0.00524185	0.0374485	aphi_vs_ctrl
MERVL	LTR/ERVL-MaLR	0.419503	8.42745	8.45e-05	0.00134063	aphi_vs_ctrl
MERVL	LTR/ERVL	0.419503	8.42745	8.45e-05	0.00134063	aphi_vs_ctrl
RMER3D	LTR/ERVK	0.408975	7.79692	0.00039496	0.00467468	aphi_vs_ctrl
MER57C2	LTR/ERV1	0.405525	4.72433	0.00683573	0.0459384	aphi_vs_ctrl
RLTR21	LTR/ERVK	0.400267	8.62628	5.46e-06	0.000154647	aphi_vs_ctrl
LTR37A	LTR/ERV1	0.388329	5.17045	0.00360605	0.0276945	aphi_vs_ctrl
RMER19C	LTR/ERVK	0.380357	8.3771	1.51e-05	0.000342424	aphi_vs_ctrl
RLTR5_Mm	LTR/ERV1	0.379885	5.8089	0.00402003	0.0300744	aphi_vs_ctrl
MLT1I	LTR/ERVL-MaLR	0.374917	6.84715	0.00656772	0.0448983	aphi_vs_ctrl
LTR16C	LTR/ERVL	0.366872	6.63402	0.00153661	0.0145063	aphi_vs_ctrl
RLTR31_Mm	LTR/ERVK	0.364353	5.36199	0.00358715	0.0276945	aphi_vs_ctrl
RLTR44C	LTR/ERVK	0.360676	7.09231	0.00189234	0.016861	aphi_vs_ctrl
MLT1H	LTR/ERVL-MaLR	0.358953	8.74984	2.94e-05	0.000598146	aphi_vs_ctrl
MLT2D	LTR/ERVL	0.342398	7.48717	0.000249647	0.00333589	aphi_vs_ctrl
RMER19A	LTR/ERVK	0.335155	8.63252	6.48e-05	0.0011492	aphi_vs_ctrl
RLTR33	LTR/ERVK	0.320452	8.35633	0.000445178	0.00511885	aphi_vs_ctrl
MLT1O	LTR/ERVL-MaLR	0.318024	5.8622	0.00555167	0.03896	aphi_vs_ctrl
RLTR22_Mur	LTR/ERVK	0.313327	8.68314	0.000256607	0.00333589	aphi_vs_ctrl
RLTR17B_Mm	LTR/ERVK	0.295642	10.3083	0.000182018	0.00262436	aphi_vs_ctrl
MYSERV16_I	LTR/ERVK	0.281068	8.06431	0.00473304	0.0341209	aphi_vs_ctrl
RLTR34B_MM	LTR/ERVK	0.280983	6.9537	0.00325435	0.025807	aphi_vs_ctrl
RMER5	LTR/ERV1	0.223004	10.1812	0.00337697	0.0265142	aphi_vs_ctrl
IAPLTR2_Mm	LTR/ERVK	-0.22947	8.97057	0.00603405	0.0416087	aphi_vs_ctrl
MTB	LTR/ERVL-MaLR	-0.244535	11.3055	0.0028664	0.0234336	aphi_vs_ctrl
MTB	LTR/ERVL	-0.244535	11.3055	0.0028664	0.0234336	aphi_vs_ctrl
LTR72_RN	LTR/ERV1	-0.283194	7.26214	0.00236449	0.0199473	aphi_vs_ctrl
MT2B2	LTR/ERVL	-0.302119	9.93854	0.00256844	0.0214397	aphi_vs_ctrl
RLTR25A	LTR/ERVK	-0.30967	8.22495	0.000274676	0.0035132	aphi_vs_ctrl
RLTR13A2	LTR/ERVK	-0.314345	7.46095	0.0043013	0.0312929	aphi_vs_ctrl
IAPLTR1a_Mm	LTR/ERVK	-0.320664	10.5476	1.83e-05	0.000391387	aphi_vs_ctrl
MLTR25A	LTR/ERVK	-0.324341	9.15655	7.98e-05	0.0013283	aphi_vs_ctrl
IAPEY3	LTR/ERVK	-0.345556	7.89167	0.00107942	0.0106997	aphi_vs_ctrl
RLTR17	LTR/ERVK	-0.347145	10.2528	0.000299604	0.0037712	aphi_vs_ctrl
IAPLTR1_Mm	LTR/ERVK	-0.3511	12.1614	0.000226839	0.00310143	aphi_vs_ctrl
RLTR16C_MM	LTR/ERVK	-0.361759	6.73018	0.00092151	0.00949036	aphi_vs_ctrl
MERV1	LTR/ERV1	-0.363775	8.31517	0.00676056	0.0458216	aphi_vs_ctrl
ORR1A0	LTR/ERVL-MaLR	-0.397652	11.4467	0.00178805	0.016298	aphi_vs_ctrl
LTRIS_Mus	LTR/ERV1	-0.398516	8.71662	1.77e-05	0.000390529	aphi_vs_ctrl
RMER16C	LTR/ERVK	-0.403603	6.65436	0.000869396	0.00919241	aphi_vs_ctrl
RLTR41A2	LTR/ERV1	-0.405538	5.99662	0.00044956	0.00511885	aphi_vs_ctrl
MamGyp	LTR/Gypsy	-0.426329	8.68183	0.00222346	0.0191652	aphi_vs_ctrl
RLTR41	LTR/ERV1	-0.426806	8.20931	2.82e-05	0.000587937	aphi_vs_ctrl
ERVB3_1I	LTR/ERVK	-0.458944	6.37137	0.00123926	0.0121325	aphi_vs_ctrl
RLTR19	LTR/ERVK	-0.465618	10.0289	4.25e-07	1.46e-05	aphi_vs_ctrl
BGLII_A	LTR/ERVK	-0.478411	5.31999	0.00182815	0.0164741	aphi_vs_ctrl
MMERVK9C_I	LTR/ERVK	-0.487217	10.0672	4.82e-07	1.57e-05	aphi_vs_ctrl
RLTR13G	LTR/ERVK	-0.5107	12.5787	1.72e-09	1.37e-07	aphi_vs_ctrl
MMETn	LTR/ERVK	-0.51665	11.2549	1.55e-08	7.68e-07	aphi_vs_ctrl
ETnERV	LTR/ERVK	-0.532006	10.1551	7.11e-09	3.76e-07	aphi_vs_ctrl
ERVB7_1LTR	LTR/ERVK	-0.534248	12.5281	4.74e-10	5.39e-08	aphi_vs_ctrl
RLTR30D_RN	LTR/ERV1	-0.535506	7.38397	7.73e-06	0.000195734	aphi_vs_ctrl
ERVB4_1CLTR	LTR/ERVK	-0.548138	10.8697	1.65e-09	1.37e-07	aphi_vs_ctrl
MamGypLTR1b	LTR/Gypsy	-0.577601	6.23325	0.000100399	0.00156111	aphi_vs_ctrl
RLTRETN_Mm	LTR/ERVK	-0.585663	13.9791	4.96e-07	1.57e-05	aphi_vs_ctrl
ERVB7_1-LTR	LTR/ERVK	-0.587768	14.8766	1.82e-10	3.6e-08	aphi_vs_ctrl
BGLII_B2	LTR/ERVK	-0.615045	7.09203	1.16e-06	3.55e-05	aphi_vs_ctrl
IAPEz	LTR/ERVK	-0.633074	5.33089	8.09e-05	0.0013283	aphi_vs_ctrl
MMVL30	LTR/ERV1	-0.638132	15.3851	0.00719546	0.0479496	aphi_vs_ctrl
MLTR13	LTR/ERVK	-0.644822	6.01499	0.000368688	0.00449799	aphi_vs_ctrl
MER34B	LTR/ERV1	-0.662059	7.79724	0.000866484	0.00919241	aphi_vs_ctrl
MER57E2	LTR/ERV1	-0.671646	7.91186	3.11e-08	1.45e-06	aphi_vs_ctrl
LTR53	LTR/ERVL	-0.761721	5.41284	2.14e-07	7.7e-06	aphi_vs_ctrl
LTR16D2	LTR/ERVL	-0.825228	4.88895	4.08e-08	1.74e-06	aphi_vs_ctrl
ERVB7_2BLTR	LTR/ERVK	-0.856546	3.9393	5.22e-05	0.00100995	aphi_vs_ctrl
RLTR4_Mm	LTR/ERV1	-0.899525	9.55517	5.16e-23	4.09e-20	aphi_vs_ctrl
LTR88c	LTR/Gypsy?	-1.03382	5.54648	5.23e-16	1.38e-13	aphi_vs_ctrl
RMER3D3	LTR/ERVK	-1.77931	1.48304	0.000102838	0.00156828	aphi_vs_ctrl
LTR39	LTR/ERV1	-1.9946	0.534	0.00389536	0.0294193	aphi_vs_ctrl

## Sheet: Sheet2
repeat_name	repeat_family	log2_fc_aph	p_value_aph	FDR_aph	log2_fc_eckersley	p_value_eckersley	FDR_eckersley
RLTR4_Mm	LTR/ERV1	-0.893173	5.09559e-13	4.05609e-10	-0.258652	0.112185	0.189357
LTR53B	LTR/ERVL	1.2396	1.88879e-12	7.51739e-10	-1.1377	0.00194497	0.00581297
L1MEi	LINE/L1	-1.16242	3.46228e-12	9.18658e-10	-1.36034	1.11003e-17	2.10113e-16
LTR88c	LTR/Gypsy?	-0.880246	1.17041e-11	2.32911e-09	-0.0207177	0.950149	0.969563
LTR53	LTR/ERVL	-0.84919	5.15309e-09	8.20372e-07	0.364528	0.203588	0.305382
ERVB7_1-LTR	LTR/ERVK	-0.571037	3.88476e-08	4.9674e-06	-1.77847	2.80979e-40	1.17568e-38
HAL1ME	LINE/L1	-0.830175	4.36832e-08	4.9674e-06	-1.0411	9.78383e-12	1.21534e-10
ERVB7_1LTR	LTR/ERVK	-0.535871	1.48905e-07	1.48161e-05	-1.7655	1.51597e-50	1.00433e-48
RLTR44	LTR/ERVK	0.713197	2.15501e-07	1.90599e-05	0.740747	3.99532e-05	0.000182545
L1M6B	LINE/L1	1.70611	2.73829e-07	2.17968e-05	0.41702	0.236646	0.343938
BGLII_B2	LTR/ERVK	-0.676621	3.56452e-07	2.57942e-05	-0.893971	1.34352e-06	8.90079e-06
MER110A	LTR/ERV1	0.877893	4.54205e-07	3.01289e-05	-0.341454	0.11948	0.197889
MLT1G	LTR/ERVL-MaLR	0.537261	6.99765e-07	4.28472e-05	0.0269256	0.822251	0.87626
MT2_Mm	LTR/ERVL	0.671879	1.04172e-06	5.92295e-05	6.1159	3.00251e-206	1.1935e-203
MT2_Mm	LTR/ERVL-MaLR	0.671879	1.04172e-06	5.92295e-05	6.1159	3.00251e-206	1.1935e-203
RLTR9A3A	LTR/ERVK	1.07152	1.14531e-06	6.07779e-05	0.711861	0.0113084	0.0262105
RLTR13G	LTR/ERVK	-0.490187	1.90037e-06	8.4623e-05	-1.90077	6.16234e-44	2.8818e-42
MER57E2	LTR/ERV1	-0.662457	1.90881e-06	8.4623e-05	-0.679487	0.000178856	0.000686909
LTRIS4A	LTR/ERV1	0.579607	1.9384e-06	8.4623e-05	1.01707	1.21624e-10	1.40132e-09
X9_LINE	LINE/L1?	-0.713361	2.0199e-06	8.4623e-05	-0.925888	0.000207847	0.000794415
LTR16A1	LTR/ERVL	0.813479	2.62951e-06	9.92709e-05	1.14134	1.55841e-09	1.5109e-08
LTR16D2	LTR/ERVL	-0.775137	2.63771e-06	9.92709e-05	-1.36781	8.08131e-08	6.76278e-07
RLTRETN_Mm	LTR/ERVK	-0.571016	2.74367e-06	9.92709e-05	-2.03656	7.8053e-57	6.89468e-55
L1Md_A	LINE/L1	-0.430365	3.11399e-06	0.000107771	0.145506	0.77938	0.839576
RLTR44D	LTR/ERVK	0.913594	3.65397e-06	0.00012119	1.49846	5.08223e-05	0.000224465
ERVB4_1CLTR	LTR/ERVK	-0.530748	7.3871e-06	0.000235205	-2.29177	6.19823e-56	4.47963e-54
MMETn	LTR/ERVK	-0.53955	7.9891e-06	0.000244589	-1.72501	2.91574e-46	1.54534e-44
LTR33B	LTR/ERVL	0.542629	1.30009e-05	0.000383285	-0.129803	0.505465	0.613504
RLTR30D_RN	LTR/ERV1	-0.54096	1.45183e-05	0.000412736	-0.876789	3.54635e-10	3.86212e-09
L1MA6	LINE/L1	0.533471	1.88722e-05	0.000518011	0.0767598	0.478704	0.589466
L1MCb	LINE/L1	0.721129	2.07031e-05	0.000549323	0.101257	0.642554	0.739077
ETnERV	LTR/ERVK	-0.513788	3.04211e-05	0.000781135	-1.78563	4.36243e-65	4.95447e-63
MamGypLTR1b	LTR/Gypsy	-0.598637	3.54961e-05	0.000882965	-0.388655	0.0937543	0.165265
RLTR19	LTR/ERVK	-0.495453	5.29777e-05	0.00127789	-0.0792518	0.668519	0.756007
MMERVK9C_I	LTR/ERVK	-0.466391	9.25973e-05	0.00216787	-0.318381	0.0018629	0.0055887
MER92	LTR/ERV1	0.792703	0.000119587	0.00271975	-0.151431	0.404133	0.521568
MLT2C1	LTR/ERVL	0.456787	0.000152416	0.00337009	0.242979	0.0563412	0.105485
RLTR25A	LTR/ERVK	-0.42349	0.000163768	0.00352322	0.250636	0.00321145	0.00898981
RLTR31_Mur	LTR/ERVK	0.446233	0.000181156	0.00379475	0.457814	0.0171522	0.0380894
MamGypLTR3a	LTR/Gypsy	0.900903	0.000314261	0.00641415	1.26889	3.58344e-07	2.63781e-06
ERVB7_2BLTR	LTR/ERVK	-0.823584	0.000324198	0.00645153	1.6162	8.0263e-09	7.33438e-08
L1ME3B	LINE/L1	0.392816	0.000378037	0.00733945	-0.600201	7.3235e-06	4.0153e-05
LTRIS4B	LTR/ERV1	-0.701522	0.000388235	0.00735798	-1.6737	0.0154359	0.0346653
SRV_MM	LTR/ERVK	0.408404	0.000402747	0.0074555	1.25946	1.38364e-13	1.86439e-12
IAPEY2	LTR/ERVK	-0.342347	0.000604966	0.0109444	1.53359	8.97321e-20	1.92803e-18
IAPLTR1a_Mm	LTR/ERVK	-0.352909	0.000711132	0.0125791	0.313281	0.0142847	0.0324467
MamSINE1	SINE/tRNA	-0.584062	0.000799053	0.0135404	-0.854078	8.5457e-08	7.07691e-07
LTR72_RN	LTR/ERV1	-0.318604	0.000801288	0.0135404	0.0306521	0.871476	0.916433
LTRIS_Mus	LTR/ERV1	-0.41252	0.000818881	0.0135404	0.384164	0.0164912	0.0368273
IAPEz	LTR/ERVK	-0.561117	0.000833515	0.0135404	1.07576	3.34594e-12	4.29035e-11
RLTR41	LTR/ERV1	-0.39596	0.000870993	0.0138662	0.520724	2.5612e-07	1.95784e-06
RMER17D	LTR/ERVK	-0.457624	0.00122779	0.0187946	0.0938146	0.356476	0.477568
LTR39	LTR/ERV1	-2.29503	0.00136517	0.0205033	-1.00898	0.116558	0.194672
RMER17A2	LTR/ERVK	-0.386391	0.00143279	0.0208409	0.0934352	0.402265	0.520848
RLTR44C	LTR/ERVK	0.36435	0.00144001	0.0208409	-0.0894678	0.682549	0.766422
MLT1H	LTR/ERVL-MaLR	0.377537	0.00149334	0.0212267	0.0859226	0.341872	0.463012
RLTR21	LTR/ERVK	0.373967	0.00159196	0.0217231	0.0711777	0.445119	0.560374
MER34B	LTR/ERV1	-0.678797	0.0016354	0.0217231	-0.50705	4.51434e-05	0.000201623
LTR79	LTR/ERVL	0.3916	0.00163739	0.0217231	0.122564	0.458919	0.573824
RLTR34B_MM	LTR/ERVK	0.306595	0.00164946	0.0217231	-0.347568	0.0364068	0.0719985
L1MC2	LINE/L1	0.339117	0.00166471	0.0217231	-0.23244	0.0276342	0.0566217
L1ME3C	LINE/L1	0.525987	0.00184073	0.0236325	-0.143703	0.44482	0.560374
L1Md_Gf	LINE/L1	-0.331986	0.00187096	0.0236394	0.550211	0.00147185	0.00457078
IAPLTR1_Mm	LTR/ERVK	-0.343018	0.00223497	0.0273948	-0.326705	0.0519693	0.0979043
Lx3B	LINE/L1	-0.539374	0.00223701	0.0273948	0.522305	4.84889e-06	2.83446e-05
L1Md_T	LINE/L1	-0.29906	0.00232058	0.0279876	0.365378	0.0993711	0.171739
L1MA5A	LINE/L1	0.291558	0.00243693	0.0289522	-0.248787	0.0631526	0.115683
X3_LINE	LINE/RTE-BovB	-0.507794	0.00249824	0.0292441	-0.764056	0.000444679	0.00156425
LTR88b	LTR/Gypsy?	0.780235	0.00269874	0.0311333	-0.183393	0.615748	0.715672
L1M8	LINE/L1	-0.520124	0.00275613	0.0313411	-0.0123652	0.948834	0.969563
RMER16C	LTR/ERVK	-0.332224	0.00280351	0.0314309	-0.756346	0.000172316	0.000668249
RLTR16C_MM	LTR/ERVK	-0.331567	0.00294885	0.0326011	0.0995415	0.595237	0.695902
MLT2D	LTR/ERVL	0.321598	0.00309671	0.0337669	0.134368	0.180488	0.278617
ERVB3_1I	LTR/ERVK	-0.471385	0.00318478	0.0342579	0.106515	0.431855	0.547567
LTR78	LTR/ERV1	-0.384901	0.00340601	0.0361491	0.255878	0.132435	0.215255
RLTR44A	LTR/ERVK	0.435415	0.00349582	0.0362136	1.26503	7.14201e-10	7.18721e-09
LTR9D	LTR/ERV1	-1.50386	0.00350308	0.0362136	-0.97698	0.231528	0.337733
MER67C	LTR/ERV1	0.49016	0.00360849	0.0368251	0.0857349	0.624849	0.720979
MER57C2	LTR/ERV1	0.46973	0.00385598	0.038637	1.64743	1.89076e-22	5.1833e-21
MLTR18D_MM	LTR/ERVK	0.29459	0.00388312	0.038637	0.269458	0.00989321	0.0236175
MER51	LTR/ERV1	-0.983722	0.00394772	0.0386996	-0.114358	0.74082	0.810048
MamGypLTR1a	LTR/Gypsy	0.914924	0.00400918	0.0386996	0.0942992	0.800757	0.857954
LTR67B	LTR/ERVL	0.418231	0.00403526	0.0386996	0.259789	0.0619305	0.113969
MLT1H2	LTR/ERVL-MaLR	0.304668	0.00426032	0.0398777	0.229464	0.077649	0.139663
LTR41B	LTR/ERVL	0.295214	0.00429591	0.0398777	-0.395009	0.0115055	0.0264806
RLTR47_MM	LTR/ERV1	1.61163	0.00430839	0.0398777	0.916743	0.0478614	0.0912465
MLTR13	LTR/ERVK	-0.51638	0.00510921	0.0462151	-0.428482	0.00130645	0.00410525
RMER19A	LTR/ERVK	0.31859	0.00522406	0.0462687	0.271809	0.00272921	0.0078613
MMVL30	LTR/ERV1	-0.625314	0.00523139	0.0462687	-0.911097	0.135127	0.218674
HERV16	LTR/ERVL	0.518066	0.00538011	0.0470612	0.265797	0.278243	0.392911
PB1D9	SINE/Alu	-0.258988	0.00551027	0.0472847	-0.499707	4.27649e-05	0.00019208
L1VL2	LINE/L1	0.303627	0.00552446	0.0472847	-0.00524354	0.963683	0.974644
RMER19C	LTR/ERVK	0.314244	0.00641969	0.0536331	0.277058	0.00694291	0.0173573
ERV316A3_I	LTR/ERVL	0.531078	0.00646552	0.0536331	0.968645	3.08392e-06	1.88593e-05
LTR16C	LTR/ERVL	0.309699	0.00650872	0.0536331	0.266098	0.0433666	0.0836807
MamGyp	LTR/Gypsy	-0.418176	0.00653569	0.0536331	-0.684604	9.52427e-07	6.52741e-06
L1MEh	LINE/L1	0.592936	0.00670637	0.0544721	-0.00837347	0.96875	0.977356
MLT1O	LTR/ERVL-MaLR	0.326623	0.00677847	0.0545017	0.0765997	0.618269	0.716764
RLTR17	LTR/ERVK	-0.336345	0.00702838	0.0559459	0.253537	0.12506	0.206272
MER67A	LTR/ERV1	0.604002	0.00714491	0.0563104	-0.174908	0.54297	0.64814
MamRep1527	LTR	0.586223	0.00733883	0.0567836	0.560342	0.0305497	0.062115
MER54A	LTR/ERVL	0.302046	0.00741897	0.0567836	-0.595674	7.51335e-05	0.000319418
IAPEY3	LTR/ERVK	-0.332903	0.00772023	0.0582051	1.28092	1.25344e-33	4.52949e-32
RLTR31_Mm	LTR/ERVK	0.350067	0.00780401	0.0582051	-0.789894	2.01202e-06	1.27965e-05
MERVL	LTR/ERVL	0.375521	0.00789051	0.0582051	5.3836	8.28808e-294	6.58902e-291
MERVL	LTR/ERVL-MaLR	0.375521	0.00789051	0.0582051	5.3836	8.28808e-294	6.58902e-291
LTRIS3	LTR/ERV1	-0.296782	0.00789718	0.0582051	0.293843	0.098672	0.171276
RLTR41A2	LTR/ERV1	-0.318255	0.00808316	0.0590293	1.67314	1.36233e-15	2.12363e-14
RLTR13A3	LTR/ERVK	0.361921	0.00856311	0.0619658	-0.182633	0.173429	0.269289
ORR1A0	LTR/ERVL-MaLR	-0.382633	0.00872989	0.0626035	1.15039	2.86018e-17	5.16783e-16
MT2B2	LTR/ERVL	-0.323961	0.00908113	0.0641147	1.55653	7.67231e-29	2.34596e-27
HERVL74	LTR/ERVL	-0.491892	0.00910171	0.0641147	-0.358341	0.0399442	0.0780238
LTR82A	LTR/ERVL	0.410063	0.0094549	0.0660184	-0.284154	0.0964178	0.168341
B1_Mus1	SINE/Alu	-0.397476	0.0095826	0.0663283	-0.0463238	0.710002	0.786144
IAPLTR4	LTR/ERVK	-0.325884	0.00967748	0.0664076	0.795898	5.42568e-10	5.67555e-09
MLTR25A	LTR/ERVK	-0.295784	0.0102273	0.0691384	0.0865268	0.410909	0.528597
RMER16_Mm	LTR/ERVK	0.369746	0.0102492	0.0691384	-0.082695	0.614952	0.715672
MamGypLTR3	LTR/Gypsy	1.02391	0.0103889	0.0694661	0.484815	0.209285	0.312021
MLT1I	LTR/ERVL-MaLR	0.369953	0.0104723	0.0694661	-0.216412	0.0861298	0.153184
L1MA5	LINE/L1	0.292177	0.011011	0.0724362	-0.0501645	0.651901	0.74356
HAL1b	LINE/L1	0.328768	0.0112721	0.0732943	-0.205411	0.198212	0.299578
L1MEg	LINE/L1	-0.538841	0.0114064	0.0732943	-0.0841868	0.677494	0.761822
RLTR31M	LTR/ERVK	-0.412071	0.0114177	0.0732943	1.62029	1.57957e-15	2.41493e-14
MERV1	LTR/ERV1	-0.377649	0.0117471	0.0748058	0.846474	1.32564e-05	6.93345e-05
MT2B1	LTR/ERVL	0.500935	0.0120196	0.0759336	2.34823	3.69435e-84	7.34253e-82
ETnERV3	LTR/ERVK	0.468902	0.0126349	0.0791917	2.25616	5.91062e-45	2.93684e-43
RLTR17B_Mm	LTR/ERVK	0.264859	0.0135019	0.0831903	-0.293062	0.00336436	0.00934323
RMER3D	LTR/ERVK	0.307837	0.0135379	0.0831903	0.662942	1.27117e-09	1.24763e-08
RMER6	LTR/ERVK	0.378783	0.0135864	0.0831903	0.290657	0.0803347	0.144167
RMER16A2	LTR/ERVK	0.320959	0.0140509	0.0853778	0.207381	0.202348	0.304168
RLTR12G	LTR/ERVK	-0.293694	0.0141867	0.0855502	0.0161663	0.909594	0.944859
MER50B	LTR/ERV1	-0.392645	0.0143933	0.0861435	-1.23651	5.1484e-06	2.96592e-05
RLTR5_Mm	LTR/ERV1	0.326224	0.0154696	0.0918939	-0.249663	0.192136	0.292621
MTB	LTR/ERVL	-0.259896	0.0157713	0.0929921	0.0366618	0.71963	0.793489
MTB	LTR/ERVL-MaLR	-0.259896	0.0157713	0.0929921	0.0366618	0.71963	0.793489
MLT2E	LTR/ERVL	0.990132	0.0162133	0.0947646	1.65207	6.61811e-08	5.65742e-07
RLTR44B	LTR/ERVK	0.408353	0.0163146	0.0947646	1.08223	0.000324342	0.00118281
LTR108e_Mam	LTR/ERVL	0.550946	0.016429	0.0947646	-0.860411	6.55803e-05	0.00028335
RLTR16	LTR/ERVK	0.271692	0.0167501	0.0959212	-0.125452	0.259663	0.372622
RLTR13A2	LTR/ERVK	-0.289348	0.0172653	0.0981656	-0.278273	0.049368	0.0936695
RLTR22_Mur	LTR/ERVK	0.274723	0.0176126	0.0991283	0.378742	3.39764e-05	0.00015889
AmnSINE2	SINE/Deu	-0.359694	0.0176837	0.0991283	-0.842227	1.45795e-05	7.57564e-05
MYSERV16_I	LTR/ERVK	0.280931	0.0178883	0.099574	0.470334	3.43716e-07	2.56791e-06
LTR106_Mam	LTR	0.714884	0.0180691	0.0998821	-0.0299691	0.924905	0.953726
RLTR33	LTR/ERVK	0.278195	0.0182031	0.0999287	0.123133	0.166346	0.259813
L1ME4c	LINE/L1	0.281401	0.0183826	0.100223	-0.337843	0.00381698	0.0103921
L1ME2z	LINE/L1	0.246924	0.0185885	0.100649	-0.447484	4.22737e-05	0.000190952
RLTR26	LTR/ERVK	0.310966	0.0187137	0.100649	0.375162	0.035519	0.0704181
RLTR1A2_MM	LTR/ERV1	-0.229458	0.0191386	0.102244	-0.271092	0.017777	0.0392576
MamGypLTR2c	LTR/Gypsy	-0.88168	0.0194228	0.10307	0.0618437	0.877208	0.918815
MER70	LTR/ERVL	-0.854373	0.0201674	0.106313	0.331089	0.308526	0.423386
LTR88a	LTR/Gypsy?	0.625702	0.0210106	0.110029	-0.00589411	0.990897	0.99465
BGLII_A	LTR/ERVK	-0.394301	0.0212264	0.110433	0.202895	0.27289	0.389493
RMER6A	LTR/ERVK	-0.53196	0.0217512	0.111559	-0.0942427	0.403937	0.521568
LTR102_Mam	LTR/ERVL	-0.555757	0.0218451	0.111559	-0.0654466	0.735561	0.808812
RLTR26_Mus	LTR/ERVK	-0.251729	0.0218633	0.111559	0.297537	0.0064797	0.0165108
L4_B	LINE/RTE-X	0.363004	0.0222502	0.11281	-0.314183	0.0600125	0.110953
RLTR41C	LTR/ERV1	-0.346744	0.0247484	0.124682	-0.633745	0.0131656	0.0300765
RLTR48B	LTR/ERV1	-0.343125	0.026073	0.129298	0.202796	0.328497	0.447184
RLTR31A_Mm	LTR/ERVK	-0.349434	0.0261511	0.129298	-0.742236	0.000423671	0.00150365
L1MA4	LINE/L1	0.269344	0.0261519	0.129298	-0.091793	0.371724	0.489273
RLTR10F	LTR/ERVK	-0.36108	0.0268456	0.131908	0.623335	1.23616e-06	8.25837e-06
L3	LINE/CR1	-0.283062	0.0277888	0.134478	-0.366697	0.00993775	0.0236175
L1MEf	LINE/L1	0.24238	0.0278101	0.134478	-0.217084	0.107732	0.183007
LTR33	LTR/ERVL	0.230383	0.0278755	0.134478	0.53953	5.64794e-05	0.000248072
RMER3D3	LTR/ERVK	-1.17076	0.0283539	0.135962	-0.391545	0.447633	0.562193
MLT1G3	LTR/ERVL-MaLR	0.244231	0.0286227	0.136429	0.0916322	0.418073	0.535214
L1MCa	LINE/L1	-0.274115	0.0292765	0.138715	-0.230895	0.0181922	0.0400631
RLTR12H	LTR/ERVK	-0.314681	0.029711	0.139941	-0.424026	0.0106625	0.0249314
ERVB3_1LTR	LTR/ERVK	-0.82641	0.0300141	0.140537	2.2273	0.000104425	0.000427927
RLTR46A	LTR/ERVK	0.795159	0.0305911	0.141351	-0.194476	0.761992	0.824196
MER57E1	LTR/ERV1	0.492609	0.0307043	0.141351	0.497515	0.0267968	0.0553336
Lx2B	LINE/L1	-0.258499	0.0307208	0.141351	0.0509115	0.5814	0.682737
LTR37A	LTR/ERV1	0.324447	0.0331534	0.151103	0.152569	0.316883	0.432113
RLTR12C	LTR/ERVK	-0.331969	0.0332198	0.151103	-0.228006	0.308886	0.423386
ID2	SINE/ID	-0.238236	0.0334802	0.151422	-0.441337	4.95235e-06	2.87381e-05
LTR16A2	LTR/ERVL	-0.354822	0.0338883	0.152402	-0.529174	0.00341663	0.00939066
RLTR12B	LTR/ERVK	0.244704	0.034208	0.152975	-0.479764	3.57553e-06	2.15344e-05
X2_LINE	LINE/CR1	-0.86471	0.0378067	0.167668	-0.862096	0.0736287	0.133641
ERVB7_2-LTR	LTR/ERVK	-0.289481	0.037933	0.167668	-0.023033	0.857251	0.90627
RLTR12A	LTR/ERVK	0.37739	0.0381255	0.167668	-0.276317	0.00883641	0.021483
ERVB7_2LTR	LTR/ERVK	-0.454632	0.03856	0.168647	-1.2004	5.84665e-06	3.29652e-05
RLTR9A4	LTR/ERVK	1.05686	0.0394626	0.171651	1.21289	0.119382	0.197889
LTR37	LTR/ERV1	-0.37918	0.0404265	0.174889	-0.137922	0.479662	0.589466
RMER5	LTR/ERV1	0.218163	0.0424335	0.180106	-0.086346	0.363732	0.48275
RLTR1E_MM	LTR/ERV1	0.766347	0.0426618	0.180106	0.189068	0.647796	0.741004
LTR34	LTR/ERV1	-1.07252	0.04278	0.180106	-0.694385	0.222663	0.327204
MER31	LTR/ERV1	0.561008	0.042781	0.180106	-0.460852	0.0566642	0.105747
RLTR26B_MM	LTR/ERVK	0.291759	0.0428151	0.180106	0.303639	0.0447907	0.0860112
MER34A	LTR/ERV1	0.257	0.0429902	0.180106	-0.535015	0.000564758	0.00194365
RMER17B2	LTR/ERVK	-0.326189	0.0438119	0.182588	0.372223	0.00502612	0.013144
L1ME3E	LINE/L1	0.251745	0.044111	0.182877	-0.340558	0.0239049	0.0509502
MLT1F1	LTR/ERVL-MaLR	0.217089	0.0445881	0.183897	0.265341	0.00491898	0.0129062
MER70B	LTR/ERVL	-0.394092	0.0454601	0.186527	1.23257	1.00291e-10	1.17252e-09
MLT1M	LTR/ERVL-MaLR	-0.30188	0.0459557	0.187593	-0.735329	5.80498e-05	0.000253569
IAP1MM_I	LTR/ERVK	-0.447457	0.0465047	0.188126	0.242436	0.0313646	0.0632865
Mam_R4	LINE/Dong-R4	0.565521	0.0466702	0.188126	0.337707	0.180872	0.278669
MER74B	LTR/ERVL	0.269387	0.0467951	0.188126	-0.0275176	0.864169	0.909953
MMERGLN	LTR/ERV1	-0.311461	0.0492363	0.196945	0.519741	3.89114e-05	0.000178812
RMER15	LTR/ERVL	0.222418	0.0507893	0.202142	0.00471853	0.963559	0.974644
RLTR26C_MM	LTR/ERVK	-0.33011	0.0511395	0.202342	0.789296	7.70486e-07	5.42068e-06
RLTR12F	LTR/ERVK	1.25006	0.0513481	0.202342	5.05797	6.54372e-24	1.92676e-22
RLTR9B2	LTR/ERVK	-0.48777	0.051782	0.203047	0.149014	0.487226	0.596833
RMER21A	LTR/ERV1	-0.319928	0.0524274	0.20345	-0.176635	0.2189	0.32227
RLTR30C_MM	LTR/ERV1	0.563183	0.0524751	0.20345	4.41153	2.50088e-58	2.48525e-56
MLTR31A_MM	LTR/ERVK	0.303574	0.0526515	0.20345	1.4522	4.1267e-20	9.3735e-19
LTR101_Mam	LTR/ERVL	-0.283248	0.0535774	0.206027	-0.407353	0.0986577	0.171276
IAPLTR2b	LTR/ERVK	-0.232973	0.0556334	0.21246	0.438732	1.50231e-05	7.75541e-05
L1MDb	LINE/L1	-0.291431	0.0559519	0.21246	-0.471541	0.000116336	0.000467107
MMTV	LTR/ERVK	-0.295615	0.0560511	0.21246	0.182547	0.278049	0.392911
RLTR47	LTR/ERVK	-0.507629	0.0564355	0.212904	-0.0903778	0.701769	0.781382
RLTR30B_MM	LTR/ERV1	0.314388	0.0569424	0.213802	0.358	0.0144063	0.0326296
CR1_Mam	LINE/CR1	-0.239741	0.0588077	0.217865	-0.862973	2.32781e-08	2.05623e-07
IAPLTR2_Mm	LTR/ERVK	-0.215321	0.0588529	0.217865	0.817928	1.47782e-17	2.73226e-16
MLT2B1	LTR/ERVL	-0.199259	0.0589922	0.217865	0.907823	8.16544e-15	1.1592e-13
LTR33A_	LTR/ERVL	0.289407	0.0591192	0.217865	-0.324584	0.0401093	0.0781485
RLTR13D3	LTR/ERVK	0.201973	0.0601556	0.220663	0.627272	6.85239e-08	5.79537e-07
RMER16	LTR/ERVK	0.214791	0.0607146	0.221692	-0.223685	0.313741	0.429302
L1_Mur1	LINE/L1	0.225911	0.061483	0.222244	0.674293	4.52182e-08	3.90744e-07
Lx3C	LINE/L1	-0.219283	0.0616615	0.222244	0.87429	1.28103e-13	1.7559e-12
RLTR19D	LTR/ERVK	0.648255	0.0617035	0.222244	0.308724	0.377576	0.494519
B4A	SINE/B4	-0.263393	0.0637104	0.228439	-0.34021	0.00342552	0.00939066
B1F1	SINE/Alu	-0.179227	0.064308	0.229548	-0.315781	0.00784502	0.0191901
LTR33A	LTR/ERVL	0.216077	0.064851	0.230453	-0.00644522	0.964836	0.974644
RLTR23	LTR/ERV1	0.21816	0.0662158	0.233457	-0.214578	0.0256949	0.053974
MER34A1	LTR/ERV1	0.29587	0.0665595	0.233457	-0.261353	0.0396862	0.0777106
ERVLE	LTR/ERVL	0.20278	0.0665762	0.233457	0.28564	0.0465821	0.0892355
LTRIS6	LTR/ERV1	0.74181	0.0685968	0.239487	0.146132	0.765125	0.825338
L1M3f	LINE/L1	-0.288642	0.0701936	0.243992	-0.862647	4.65485e-05	0.000206738
MLTR12	LTR/ERV1	0.22684	0.0707426	0.244831	-1.05109	0.0202452	0.0442169
ERVB4_2LTR	LTR/ERVK	-0.382484	0.0711363	0.245128	1.6539	1.01635e-07	8.24489e-07
ERVB7_3LTR	LTR/ERVK	-0.666238	0.0721882	0.24768	2.97962	1.48765e-18	3.11232e-17
L1MEj	LINE/L1	-0.299623	0.0730254	0.249477	-0.257192	0.166328	0.259813
MLT1J2	LTR/ERVL-MaLR	-0.251508	0.0754123	0.256531	-0.292882	0.10929	0.185258
RLTR11B	LTR/ERVK	-0.206211	0.0765092	0.259154	-0.267957	0.0726492	0.132468
RLTR9A2	LTR/ERVK	-0.274859	0.0775837	0.261681	0.0512564	0.763637	0.824852
LTR29	LTR/ERV1	-1.06522	0.0787088	0.263991	2.03884	0.00283357	0.00810319
MER101B	LTR/ERV1	1.69747	0.0789319	0.263991	-0.0363863	0.961248	0.974644
LTR81A	LTR/Gypsy	0.507237	0.0802297	0.267209	-0.0923017	0.755226	0.819106
MMERVK10D3	LTR/ERVK	-0.603486	0.081016	0.268703	1.30023	8.9926e-06	4.79807e-05
RLTR50A	LTR/ERVK	-0.809764	0.0818087	0.270206	1.00638	0.0512702	0.0968166
RLTR9E	LTR/ERVK	-0.295834	0.0831313	0.27344	-0.26174	0.010042	0.0237601
RLTR17D_Mm	LTR/ERVK	0.218884	0.0848487	0.277941	-0.0696471	0.508349	0.616063
RLTR19A2	LTR/ERVK	-0.409331	0.0860448	0.280704	0.650133	0.0511976	0.0968166
LTR86B1	LTR/ERVL	0.252634	0.0878701	0.285488	-0.397921	0.180053	0.278486
MLT2F	LTR/ERVL	-0.245627	0.0902559	0.292047	-0.177772	0.158511	0.250529
RMER17A	LTR/ERVK	-0.221775	0.0950059	0.306173	0.339561	0.00155884	0.00478484
LTR16D1	LTR/ERVL	-0.298027	0.0964069	0.309435	-1.061	1.8475e-06	1.18449e-05
RMER4B	LTR/ERVK	-0.171097	0.097541	0.311818	-0.397344	1.88819e-05	9.68461e-05
RLTR9A3B	LTR/ERVK	-0.326398	0.0989	0.314898	0.223458	0.294199	0.412243
ERVB7_3-LTR	LTR/ERVK	-0.25725	0.103605	0.328565	0.351768	0.0627595	0.115228
LTR108c_Mam	LTR/ERVL	0.637146	0.104533	0.330193	-0.733233	0.13533	0.218674
L1M3d	LINE/L1	0.497121	0.106564	0.335275	-0.165387	0.459059	0.573824
RLTR13F	LTR/ERVK	-0.335294	0.107722	0.336833	-0.63181	8.32169e-05	0.000348197
BGLII	LTR/ERVK	-0.212641	0.107905	0.336833	-0.300508	0.015135	0.0340858
LTR75	LTR/ERVL	-0.244352	0.10918	0.339482	-0.499797	0.105804	0.181165
L1MEg1	LINE/L1	0.482047	0.111177	0.344076	0.191627	0.577792	0.679504
RNERVK23	LTR/ERVK	-0.227625	0.111522	0.344076	-0.553883	0.00339052	0.00935924
L1M7	LINE/L1	-0.281474	0.112839	0.345157	0.941959	4.19422e-10	4.50595e-09
L1MC1	LINE/L1	0.17294	0.112931	0.345157	-0.168122	0.128386	0.211319
RMER21B	LTR/ERV1	-0.17225	0.113173	0.345157	-0.0401299	0.712447	0.787754
IAP1-MM	LTR/ERVK	-0.35186	0.114674	0.345169	0.924614	2.98168e-05	0.000142797
RMER13B	LTR/ERVK	-0.202963	0.114724	0.345169	0.447514	0.00658589	0.0166745
RLTR44E	LTR/ERVK	-0.197229	0.114884	0.345169	-0.120509	0.47858	0.589466
LTR40b	LTR/ERVL	-0.227317	0.115142	0.345169	0.805292	4.54292e-15	6.66693e-14
ERVB4_1B-LTR	LTR/ERVK	-0.313852	0.115345	0.345169	-0.212301	0.263495	0.37676
RLTR1D	LTR/ERV1	-0.170507	0.116915	0.346405	-0.230497	0.224538	0.329206
Lx5	LINE/L1	-0.19646	0.117365	0.346405	0.558515	1.79312e-08	1.60172e-07
ERV3-16A3	LTR/ERVL	0.381574	0.11781	0.346405	-0.0140109	0.95127	0.969563
LTR16D	LTR/ERVL	0.331575	0.117935	0.346405	1.71326	1.1936e-16	2.05055e-15
BGLII_Mus	LTR/ERVK	-0.177011	0.119404	0.349433	0.236706	0.177397	0.274913
L1M1	LINE/L1	0.203396	0.120735	0.350974	0.0837746	0.577447	0.679504
MLT1F	LTR/ERVL-MaLR	0.190813	0.120855	0.350974	-0.289589	0.0133453	0.0303997
RLTR31C_MM	LTR/ERVK	0.169787	0.121253	0.350974	-0.00183842	0.989793	0.99465
MLT1E3	LTR/ERVL-MaLR	0.226707	0.122028	0.351613	0.0518221	0.693957	0.774854
LTR84a	LTR/ERVL	0.292844	0.122775	0.351613	-0.069555	0.782367	0.841653
L1ME3Cz	LINE/L1	-0.159723	0.123173	0.351613	-0.528177	2.44586e-07	1.88783e-06
MLTR18C_MM	LTR/ERVK	0.211449	0.123622	0.351613	-0.0195979	0.873968	0.916628
MLT	LTR/ERVL-MaLR	-0.303355	0.123931	0.351613	-0.650779	1.79262e-07	1.41102e-06
RLTR6C_Mm	LTR/ERV1	-0.391668	0.124125	0.351613	-0.932496	0.0272111	0.0559998
ORR1D	LTR/ERVL-MaLR	0.175445	0.124789	0.352241	0.281465	0.0023103	0.00682783
RMER10A	LTR/ERVL	-0.175812	0.128603	0.361724	-0.161176	0.114065	0.191263
RLTR13B3	LTR/ERVK	0.177493	0.129545	0.363091	0.34326	0.0212214	0.046222
RLTR13D3A1	LTR/ERVK	0.164879	0.130778	0.365261	-0.292361	0.00432728	0.0116222
B1_Mus2	SINE/Alu	-0.157655	0.13149	0.365965	-0.36782	0.00177424	0.00538368
L1ME3D	LINE/L1	-0.249909	0.132327	0.367013	-0.663094	7.92365e-05	0.000333296
B2_Mm2	SINE/B2	0.259639	0.133041	0.367711	-0.0165636	0.896041	0.934846
RLTR20B1	LTR/ERVK	-0.184563	0.135206	0.372401	-0.0544949	0.692071	0.773835
L1M3e	LINE/L1	-0.181585	0.136335	0.373193	-0.150126	0.130247	0.213498
L1ME3G	LINE/L1	0.179982	0.136431	0.373193	-0.531759	8.34641e-06	4.51388e-05
L1_Mm	LINE/L1	-0.288454	0.138394	0.377267	-1.07089	2.86014e-05	0.000137807
MuRRS	LTR/ERV1	0.211624	0.139036	0.377723	1.50229	1.97406e-15	2.96109e-14
RLTR30	LTR/ERV1	0.191324	0.1408	0.380043	0.873975	2.1181e-10	2.37167e-09
L1MB7	LINE/L1	0.161858	0.140845	0.380043	-0.440384	1.97161e-05	0.000100476
L1MC3	LINE/L1	0.169204	0.141634	0.380664	0.069921	0.455579	0.57127
L1MEc	LINE/L1	0.172317	0.142032	0.380664	-0.205846	0.0285125	0.0582711
LTR108a_Mam	LTR/ERVL	0.331122	0.143467	0.38322	-0.605479	0.119199	0.197889
MER129	LTR?	0.539505	0.144928	0.385829	-0.214089	0.518255	0.626159
RLTR51A_Mm	LTR/ERVK?	-0.177424	0.145544	0.386178	-0.106948	0.353389	0.475893
X7A_LINE	LINE/CR1	-0.189745	0.146784	0.388172	-0.874417	2.96782e-08	2.59276e-07
MIRb	SINE/MIR	-0.153814	0.148061	0.390252	-0.233531	0.0402047	0.0781485
MER21	LTR/ERVL	-0.348852	0.153249	0.402594	0.33571	0.193144	0.293033
MER21B	LTR/ERVL	-0.165111	0.154344	0.404137	-0.394955	1.01769e-06	6.91507e-06
LTR52	LTR/ERVL	0.36417	0.155652	0.405986	0.351114	0.367945	0.485102
MER4B	LTR/ERV1	0.513485	0.156881	0.405986	-1.27446	0.0381232	0.0750196
RMER17B	LTR/ERVK	-0.176648	0.157005	0.405986	0.155848	0.132306	0.215255
B1_Mur3	SINE/Alu	-0.133031	0.15709	0.405986	-0.474119	2.24969e-05	0.000112485
LTR45C	LTR/ERV1	-0.658087	0.159408	0.408706	-0.482669	0.27511	0.391958
L1MD2	LINE/L1	-0.156953	0.159618	0.408706	-0.314099	0.00232366	0.0068419
MER110	LTR/ERV1	0.376314	0.159683	0.408706	0.632753	0.0272603	0.0559998
AmnSINE1	SINE/Deu	-0.23371	0.161513	0.411725	-0.256214	0.0246348	0.0522257
MLTR18B_MM	LTR/ERVK	-0.237687	0.16195	0.411725	-0.297846	0.00664553	0.0167721
L1MA10	LINE/L1	0.245017	0.162414	0.411725	-0.331361	0.0231565	0.049621
L1M3a	LINE/L1	0.595383	0.164002	0.41443	-0.0389023	0.932162	0.956217
L1Md_F	LINE/L1	-0.156429	0.166122	0.41846	0.921723	6.99547e-12	8.82762e-11
LTR33C	LTR/ERVL	-0.226391	0.166696	0.41858	0.0913244	0.52713	0.632079
RLTR1F_Mm	LTR/ERVK	0.389782	0.168801	0.422532	0.823392	0.000430861	0.00152238
RLTR42	LTR/ERVK	-0.170783	0.170693	0.425532	-0.303494	0.0240162	0.0510504
L1M2a	LINE/L1	0.191947	0.172329	0.425532	-0.356619	0.251903	0.363731
RLTR20B5_MM	LTR/ERVK	0.184412	0.172483	0.425532	-0.465323	0.000228956	0.000854555
MER90a	LTR/ERV1	0.224644	0.17268	0.425532	0.00867047	0.959801	0.97451
B3	SINE/B2	-0.122108	0.173191	0.425532	-0.406749	0.000534631	0.00184796
RLTR6B_Mm	LTR/ERV1	-0.156339	0.173206	0.425532	2.21705	1.56133e-82	2.48252e-80
L1_Mur3	LINE/L1	0.155426	0.174492	0.42737	0.432449	0.000276065	0.00101607
MMERVK10C	LTR/ERVK	-0.157179	0.176258	0.430371	0.600099	4.22762e-06	2.52704e-05
L1M6	LINE/L1	0.263734	0.179636	0.437279	-0.0293115	0.911581	0.944859
RMER6C	LTR/ERVK	0.153798	0.180601	0.438164	0.441517	0.0011032	0.00352225
B1F2	SINE/Alu	-0.123696	0.181509	0.438164	-0.417499	7.90773e-05	0.000333296
PB1D7	SINE/Alu	-0.120734	0.181651	0.438164	-0.501978	6.44818e-06	3.58483e-05
RLTR26D_MM	LTR/ERVK	-0.175415	0.183714	0.441802	0.144531	0.414563	0.532435
L1MB4	LINE/L1	0.15708	0.184704	0.442844	-0.11418	0.27825	0.392911
RLTR20B3	LTR/ERVK	-0.161934	0.187752	0.447535	-0.430743	0.00161125	0.00492669
B3A	SINE/B2	-0.117693	0.188513	0.447535	-0.392175	0.000758028	0.00253207
LTR28	LTR/ERV1	0.621183	0.188611	0.447535	-0.572065	0.445479	0.560374
MLT2B4	LTR/ERVL	0.152773	0.189027	0.447535	0.000858129	0.993731	0.996237
IAPEY4_I	LTR/ERVK	0.165695	0.189471	0.447535	0.0347501	0.929935	0.955166
LTRIS2	LTR/ERV1	-0.148236	0.19058	0.448823	-0.469875	0.00740058	0.0183285
RLTR19A	LTR/ERVK	-0.150682	0.193802	0.453924	-0.156603	0.427087	0.544126
MLT2B5	LTR/ERVL	0.229212	0.193887	0.453924	0.152439	0.356825	0.477568
L1MB8	LINE/L1	0.15969	0.196325	0.4575	-0.342531	0.00180841	0.00546648
ERVB4_1-LTR	LTR/ERVK	0.834038	0.196564	0.4575	-0.98365	0.183708	0.281646
LTR103b_Mam	LTR/ERV1?	-0.367297	0.19748	0.458291	1.90325	0.00229433	0.00680595
L1MC4a	LINE/L1	0.147485	0.199096	0.460699	-0.330973	0.000210472	0.000797767
LTR16A	LTR/ERVL	0.143325	0.200177	0.461857	0.0544945	0.643322	0.739077
Plat_L3	LINE/CR1	0.157349	0.201709	0.463924	-0.445963	0.000633653	0.00215279
MER57D	LTR/ERV1	-0.216138	0.202238	0.463924	-0.340405	0.0616849	0.113781
MER68	LTR/ERVL	0.15218	0.203027	0.464355	-0.270569	0.00289476	0.00821904
Lx2	LINE/L1	-0.159647	0.203593	0.464355	0.633961	3.88754e-09	3.67928e-08
LTR10_RN	LTR/ERVK	0.135501	0.206914	0.470582	-0.228876	0.0436668	0.0840559
LTR80A	LTR/ERVL	-0.449205	0.210389	0.476586	0.423875	0.209584	0.312021
RLTR11A	LTR/ERVK	-0.1438	0.210752	0.476586	-0.114411	0.168247	0.261755
LTR16B1	LTR/ERVL	0.306375	0.211657	0.477277	0.187353	0.361086	0.48246
L1MEd	LINE/L1	-0.20809	0.214053	0.481317	-0.186923	0.0290887	0.0592962
ERVB7_2B-LTR	LTR/ERVK	-0.14434	0.21562	0.48234	0.432618	0.0224191	0.0483012
MLT1G1	LTR/ERVL-MaLR	-0.178629	0.21572	0.48234	-0.780855	2.22661e-10	2.45855e-09
MER67B	LTR/ERV1	-0.154221	0.217818	0.484185	0.333621	0.129522	0.212748
RLTR9D2	LTR/ERVK	-0.15166	0.218029	0.484185	0.2368	0.190263	0.290325
IAPLTR2a	LTR/ERVK	-0.129144	0.21837	0.484185	0.638516	6.90654e-07	4.90241e-06
IAPLTR3	LTR/ERVK	-0.13442	0.21954	0.484316	1.13494	1.21228e-16	2.05055e-15
RLTR46	LTR/ERVK	-1.15695	0.219646	0.484316	2.22301	0.0115249	0.0264806
L1M3	LINE/L1	0.151928	0.220373	0.484577	0.113665	0.298676	0.415118
ERVB7_4LTR	LTR/ERVK	0.962649	0.225947	0.494595	6.88284	7.86906e-13	1.02556e-11
LTR85a	LTR/Gypsy?	0.23536	0.226171	0.494595	0.36656	0.202396	0.304168
MER95	LTR/ERV1	0.709449	0.227409	0.49501	1.78103	0.00024163	0.000897644
RLTR12E	LTR/ERVK	-0.142494	0.227652	0.49501	-0.460314	2.40143e-05	0.000119321
MLTR14	LTR/ERV1	0.131543	0.228227	0.49501	0.0123272	0.900825	0.938606
L4_A	LINE/RTE-X	-0.135016	0.230943	0.499539	-0.415999	0.000129939	0.000516508
MLTR31E_MM	LTR/ERVK	-0.234699	0.236263	0.509054	-0.792522	0.000980522	0.0031817
PB1	SINE/Alu	-0.127161	0.23662	0.509054	-0.445737	1.05106e-05	5.57064e-05
L1VL1	LINE/L1	-0.983197	0.237652	0.509441	0.494858	2.6717e-06	1.65938e-05
L1MA4A	LINE/L1	0.135425	0.238081	0.509441	-0.0196514	0.885117	0.925879
RLTR19B	LTR/ERVK	0.172446	0.242965	0.518498	0.375982	0.00435282	0.0116515
L1M3c	LINE/L1	-0.242854	0.245472	0.520732	0.0166617	0.956034	0.973171
L1M	LINE/L1	-0.169064	0.24567	0.520732	0.0991494	0.504933	0.613504
LTR85c	LTR/Gypsy?	-0.21357	0.245974	0.520732	0.0721198	0.790808	0.848438
RLTR18B	LTR/ERVK	0.1273	0.250597	0.529112	-0.293318	0.00405789	0.0110103
MER73	LTR/ERVL	0.365345	0.2559	0.536069	-0.64044	0.217084	0.321382
Lx3A	LINE/L1	-0.133174	0.256305	0.536069	0.317799	0.000667906	0.00224994
LTR85b	LTR/Gypsy?	0.476094	0.256697	0.536069	-1.23748	0.010442	0.0244878
L1MB1	LINE/L1	0.132293	0.257453	0.536069	0.11368	0.252096	0.363731
RMER19B	LTR/ERVK	-0.163758	0.257503	0.536069	-0.396884	0.099763	0.172042
L1MCc	LINE/L1	0.188725	0.258061	0.536069	-0.469699	0.000800857	0.00264183
ERVB4_1C-LTR	LTR/ERVK	0.164988	0.259417	0.536069	0.283786	0.183867	0.281646
MER31B	LTR/ERV1	-0.159127	0.259878	0.536069	-0.654307	1.541e-06	1.00418e-05
L5	LINE/RTE-X	0.342672	0.260334	0.536069	-0.466353	0.157474	0.249386
LTR89	LTR/ERVL?	0.178524	0.261192	0.536069	0.00385203	0.983644	0.989869
MLT1N2	LTR/ERVL-MaLR	0.145739	0.2613	0.536069	0.166728	0.302785	0.418634
MusHAL1	LINE/L1	0.138534	0.262551	0.537252	0.683388	4.76257e-10	5.04832e-09
X6B_LINE	LINE/CR1	0.20758	0.26337	0.537546	-0.111546	0.493493	0.602653
MMERVK10D3_I	LTR/ERVK	0.130855	0.264588	0.53865	1.06821	4.37327e-16	6.95349e-15
LTR78B	LTR/ERV1	-0.207721	0.266373	0.540459	0.179067	0.308713	0.423386
RLTR10E	LTR/ERVK	-0.161448	0.266834	0.540459	-0.581071	0.00111645	0.0035503
LTR37B	LTR/ERV1	0.268109	0.268297	0.541894	-0.23811	0.18187	0.279665
MER70A	LTR/ERVL	0.276629	0.268905	0.541894	0.365581	0.11421	0.191263
RLTR24	LTR/ERV1	0.131516	0.270299	0.543056	-0.15294	0.107099	0.182711
L1M2	LINE/L1	0.126614	0.271143	0.543056	0.124623	0.315103	0.430424
RLTR18	LTR/ERVK	-0.131669	0.271528	0.543056	-0.297331	0.00245985	0.00718964
MRLTR33	LTR/ERVK	0.134328	0.27307	0.544771	-0.012496	0.917967	0.949003
RMER17D2	LTR/ERVK	-0.115068	0.274422	0.546101	0.0374944	0.759155	0.822246
L1ME4a	LINE/L1	0.151222	0.276287	0.548439	-0.2061	0.0943383	0.16575
L1_Mus2	LINE/L1	-0.108388	0.279137	0.552718	0.529636	5.57691e-06	3.16689e-05
RLTR20B3A_MM	LTR/ERVK	-0.116986	0.281839	0.555412	-0.457653	0.000628555	0.00214464
L1MC5a	LINE/L1	0.138625	0.282176	0.555412	-0.312327	0.00314435	0.00883306
RMER19B2	LTR/ERVK	0.135293	0.28259	0.555412	0.154488	0.0854386	0.152295
L1MC5	LINE/L1	0.122477	0.28663	0.561964	-0.316227	0.00464384	0.0123138
LTR83	LTR/ERVL	0.221745	0.290177	0.566583	1.50782	1.79705e-10	2.04093e-09
LTR86B2	LTR/ERVL	-0.368942	0.290409	0.566583	-0.311808	0.462685	0.577449
RMER3D4	LTR/ERVK	-0.719801	0.292405	0.569082	-0.813014	0.192516	0.29264
L1MD	LINE/L1	0.11925	0.296111	0.571965	-0.164406	0.160604	0.253333
X1_LINE	LINE/CR1	-0.597798	0.296146	0.571965	-0.322329	0.62422	0.720979
RLTR20A3_MM	LTR/ERVK	-0.119088	0.296338	0.571965	-0.308413	0.00476784	0.0125511
X8_LINE	LINE/CR1	-0.176625	0.296761	0.571965	0.325658	0.148295	0.23579
MLTR31C_MM	LTR/ERVK	-0.158337	0.299322	0.572312	0.233755	0.114276	0.191263
RLTR27	LTR/ERVK	-0.114866	0.299665	0.572312	0.681728	8.74376e-06	4.69682e-05
RMER13A1	LTR/ERVK	-0.147866	0.299745	0.572312	-0.0999571	0.362707	0.48275
MLT1E	LTR/ERVL-MaLR	0.111067	0.299816	0.572312	-0.554902	0.000407513	0.00145934
MLT1K	LTR/ERVL-MaLR	0.118525	0.301164	0.572818	0.0572016	0.557168	0.661187
RLTR13E	LTR/ERVK	-0.111824	0.302031	0.572818	-0.168904	0.0746288	0.135148
LTR48B	LTR/ERV1	0.178861	0.30224	0.572818	-0.237956	0.211334	0.314038
X6A_LINE	LINE/CR1	-0.149521	0.305685	0.577011	-0.384255	0.0344674	0.0690215
RMER6D	LTR/ERVK	0.133758	0.305903	0.577011	0.15865	0.216593	0.321252
RLTR48A	LTR/ERV1	0.105466	0.315567	0.593833	0.579305	6.9349e-09	6.41075e-08
RLTR20A1	LTR/ERVK	0.229486	0.316838	0.594818	-0.0950604	0.713514	0.787838
LTR104_Mam	LTR/Gypsy	0.177857	0.320779	0.599497	-0.694548	0.0837846	0.15002
RLTR9D	LTR/ERVK	-0.112625	0.321398	0.599497	-0.0375778	0.751155	0.815804
RLTR20A	LTR/ERVK	-0.116542	0.321589	0.599497	0.591078	2.47972e-05	0.000122446
ERVB5_1I	LTR/ERVK	0.189645	0.323407	0.601467	1.0661	3.66803e-05	0.00016954
ERVB4_2I	LTR/ERVK	-0.185587	0.324157	0.601467	1.98676	3.45676e-48	1.96295e-46
MER54B	LTR/ERVL	0.159642	0.325721	0.601766	0.371449	0.0893117	0.158171
RLTR13D2	LTR/ERVK	-0.104795	0.326421	0.601766	0.442803	0.0070619	0.0175444
MLT1A	LTR/ERVL-MaLR	0.112439	0.326587	0.601766	0.0901822	0.29557	0.412243
MIR	SINE/MIR	0.0925716	0.327476	0.601911	-0.275124	0.0107495	0.0250611
MLTR18_MM	LTR/ERVK	0.121623	0.32906	0.601911	-0.194309	0.113643	0.191263
MER65	LTR/ERV1	0.350768	0.329514	0.601911	-0.309657	0.497293	0.605433
MER49	LTR/ERV1	0.273818	0.32969	0.601911	-0.708689	0.122993	0.203284
IAPEY5_I	LTR/ERVK	0.328263	0.330882	0.602706	1.06484	0.00883374	0.021483
B1_Mur4	SINE/Alu	-0.0883937	0.332217	0.603258	-0.481689	2.09198e-05	0.000105261
ERVB2_1AI	LTR/ERVK	0.106177	0.332701	0.603258	-0.528123	3.45619e-07	2.56791e-06
MER92A	LTR/ERV1	-0.517348	0.333919	0.60409	-0.583159	0.201037	0.303272
MurERV4_19	LTR/ERVK	0.127833	0.334821	0.604349	0.471544	0.000594669	0.00203777
RMER20B	LTR/ERVK	-0.115706	0.335982	0.605072	-0.0240463	0.826264	0.878181
RLTR34D_MM	LTR/ERVK	0.15711	0.338588	0.60711	0.197384	0.247951	0.359054
LTR40a	LTR/ERVL	0.137841	0.339378	0.60711	0.113013	0.521984	0.629409
RLTR10	LTR/ERVK	-0.13808	0.339402	0.60711	0.292867	0.00993213	0.0236175
RLTR10	LTR/ERVL	-0.13808	0.339402	0.60711	0.292867	0.00993213	0.0236175
RLTR10	LTR/ERVL-MaLR	-0.13808	0.339402	0.60711	0.292867	0.00993213	0.0236175
LTR81	LTR/Gypsy	0.410712	0.340762	0.608177	0.943323	0.00616532	0.0157602
MLT1B	LTR/ERVL-MaLR	0.1004	0.343945	0.612033	0.100602	0.27729	0.392911
B1_Mm	SINE/Alu	-0.106497	0.344461	0.612033	-0.294429	0.0108102	0.0251291
L1MA7	LINE/L1	0.101081	0.349396	0.618674	-0.405957	0.000893129	0.00290999
LTR105_Mam	LTR/ERVL	-0.212761	0.349753	0.618674	0.619391	0.00773551	0.0189807
MER66	LTR/ERV1	-0.266522	0.351063	0.61893	0.466956	0.188354	0.287965
ORR1A1	LTR/ERVL-MaLR	-0.10189	0.351561	0.61893	1.15565	3.08061e-23	8.74674e-22
RLTR13B4	LTR/ERVK	0.114838	0.35223	0.61893	0.569482	0.00102276	0.00329189
RodERV21	LTR/ERV1	0.123355	0.353027	0.618963	0.457682	4.38755e-06	2.58378e-05
MamGypLTR1d	LTR/Gypsy	0.365329	0.354914	0.620904	-1.10981	0.0990671	0.171587
MLT2C2	LTR/ERVL	-0.1207	0.35743	0.621988	-0.184023	0.352234	0.475426
L1MC4	LINE/L1	0.102151	0.358208	0.621988	-0.245916	0.0261452	0.0546985
RLTR20C2_MM	LTR/ERVK	0.110224	0.358578	0.621988	-0.202306	0.0307837	0.0624312
RLTR8	LTR/ERVK	-0.124385	0.359135	0.621988	0.102972	0.488272	0.597194
RLTR9F	LTR/ERVK	-0.158905	0.359726	0.621988	-0.625216	0.0168601	0.0375457
MYSERV	LTR/ERVK	0.0999439	0.360222	0.621988	-0.151343	0.103536	0.178162
LTR69	LTR/ERVL	-0.263001	0.361335	0.622114	0.309161	0.468651	0.582326
LTR68	LTR/ERV1	0.391571	0.361858	0.622114	0.184952	0.61849	0.716764
ERVL	LTR/ERVK	0.112039	0.365033	0.626221	0.1678	0.363201	0.48275
ERVL	LTR/ERVL	0.112039	0.365033	0.626221	0.1678	0.363201	0.48275
MLTR11A	LTR/ERVK	-0.108084	0.374929	0.641544	-0.281557	0.00108719	0.00348515
MER21C	LTR/ERVL	0.099562	0.375577	0.641544	-0.255249	0.00361932	0.00988784
MER67D	LTR/ERV1	0.177799	0.376684	0.642057	1.719	5.60041e-13	7.42055e-12
LTRIS5	LTR/ERV1	-0.20804	0.378498	0.643256	0.810845	0.000642198	0.00217254
RLTR20B2	LTR/ERVK	-0.0924886	0.380197	0.643256	-0.332016	0.019268	0.0423151
RLTR3_Mm	LTR/ERVK	-0.179805	0.380678	0.643256	-0.403849	0.239458	0.347388
RLTR13B2	LTR/ERVK	0.130287	0.381285	0.643256	2.02941	3.04943e-33	1.05404e-31
LTR86C	LTR/ERVL	-0.213004	0.381719	0.643256	-0.967448	0.00284464	0.00810568
Lx4A	LINE/L1	0.0977647	0.382547	0.643256	0.954817	7.77845e-22	1.9948e-20
MER92C	LTR/ERV1	0.329895	0.383045	0.643256	0.949222	0.0353079	0.0701745
ID4_	SINE/ID	-0.0824227	0.384288	0.643986	-0.452699	3.59318e-05	0.000167051
MER52	LTR/ERV1	0.187635	0.38552	0.644693	0.973249	0.000515681	0.00179025
RLTR46A2	LTR/ERVK	0.232944	0.38945	0.649802	2.15984	3.18618e-09	3.05182e-08
ERVB4_1BI	LTR/ERVK	0.101077	0.390208	0.649802	0.87569	6.47635e-09	6.05729e-08
LTR9A1	LTR/ERV1	-0.504066	0.394241	0.654592	0.506001	0.560712	0.664331
LTR9	LTR/ERV1	-0.145355	0.394729	0.654592	-0.21119	0.545823	0.650568
ERVB4_1BLTR	LTR/ERVK	-0.312424	0.396689	0.656475	1.63606	2.46121e-06	1.5529e-05
LTR40A1	LTR/ERVL	0.26743	0.397825	0.65664	-0.251419	0.410023	0.528312
L1ME2	LINE/L1	0.0908794	0.398439	0.65664	-0.216551	0.0175411	0.0388445
L1M4a2	LINE/L1	0.0971329	0.403866	0.664209	0.299378	0.0582423	0.108184
L1MEb	LINE/L1	0.138553	0.405261	0.66513	-0.406286	0.0103321	0.024374
L1PB4	LINE/L1	-0.177459	0.407066	0.666717	-0.815566	0.000787304	0.00260794
L1MB3	LINE/L1	0.11043	0.409577	0.667407	-0.265039	0.0068839	0.017264
MLTR73	LTR/ERV1	0.082402	0.410088	0.667407	-0.0650216	0.664358	0.752742
RLTR12D	LTR/ERVK	0.0989365	0.410904	0.667407	-0.463819	0.000126963	0.000507215
Lx7	LINE/L1	0.0780184	0.412218	0.667407	0.221701	0.0845699	0.151086
L2c	LINE/L2	-0.0833488	0.412609	0.667407	-0.301987	0.00257404	0.00749583
MER68C	LTR/ERVL	-0.237483	0.416184	0.667407	-0.543739	0.131179	0.214583
RLTR53B_Mm	LTR/ERVK	-0.171235	0.416328	0.667407	-0.348218	0.13698	0.220891
MER31A	LTR/ERV1	0.0988067	0.41653	0.667407	0.0490259	0.691111	0.773835
RLTR50B	LTR/ERVK	0.132526	0.417183	0.667407	5.1282	4.39192e-142	1.16386e-139
RLTR50B	LTR/ERVL	0.132526	0.417183	0.667407	5.1282	4.39192e-142	1.16386e-139
RLTR50B	LTR/ERVL-MaLR	0.132526	0.417183	0.667407	5.1282	4.39192e-142	1.16386e-139
MT2A	LTR/ERVL	-0.0862334	0.417638	0.667407	0.0871258	0.375853	0.493074
RLTR9B	LTR/ERVK	-0.105578	0.417908	0.667407	1.277	1.2485e-16	2.06783e-15
L1ME4b	LINE/L1	0.0950486	0.418047	0.667407	-0.377504	4.05697e-05	0.000184302
L1ME3	LINE/L1	0.0865465	0.418387	0.667407	0.181926	0.164862	0.258511
MER72B	LTR/ERV1	-0.47713	0.420781	0.669883	-0.758522	0.206191	0.308123
RLTR11A2	LTR/ERVK	-0.0981001	0.421904	0.670331	-0.124334	0.131587	0.214809
BGLII_B	LTR/ERVK	-0.103341	0.432626	0.685997	0.0785899	0.557227	0.661187
RLTR53_Mm	LTR/ERVK	0.583896	0.434893	0.687491	-0.264165	0.0395992	0.0777106
PB1D10	SINE/Alu	-0.0713711	0.435296	0.687491	-0.451574	9.97902e-05	0.000413194
MMERVK9E_I	LTR/ERVK	-0.103571	0.438092	0.690536	0.518114	6.08629e-07	4.3591e-06
MER66B	LTR/ERV1	-0.495679	0.4405	0.69296	-0.030888	0.946955	0.968892
MuRRS4	LTR/ERV1	0.095306	0.44333	0.695914	1.28617	4.93821e-29	1.57035e-27
MT2C_Mm	LTR/ERVL	-0.0885554	0.444126	0.695914	1.68087	1.73082e-56	1.376e-54
B1_Mur1	SINE/Alu	-0.068795	0.446424	0.696195	-0.408828	0.000372815	0.00134112
ORR1F	LTR/ERVL-MaLR	0.076595	0.447035	0.696195	-0.0188484	0.863523	0.909953
MLT1A1	LTR/ERVL-MaLR	-0.0900436	0.44724	0.696195	-0.0398924	0.647703	0.741004
RLTR4_MM	LTR/ERV1	0.127155	0.447804	0.696195	0.101359	0.444853	0.560374
RLTR13C1	LTR/ERVK	0.0957494	0.449113	0.696545	-0.0882274	0.525421	0.630982
ERVB2_1I	LTR/ERVK	0.265584	0.450284	0.696545	0.82919	0.00924602	0.0222745
HERVL40	LTR/ERVL	-0.0984149	0.450919	0.696545	-1.139	5.34042e-20	1.17934e-18
RLTR13D4	LTR/ERVK	0.146591	0.451529	0.696545	0.30546	0.104837	0.180012
RLTR20D	LTR/ERVK	-0.0792686	0.452749	0.696888	-0.32551	0.00440622	0.0117549
LTR77	LTR/ERV1	0.44625	0.453503	0.696888	-0.428519	0.565602	0.669127
HAL1_SS	LINE/L1	-0.219327	0.458813	0.70186	-0.411414	0.143671	0.229355
RLTR1C	LTR/ERV1	0.0777009	0.459308	0.70186	-0.124029	0.302425	0.418634
RMER20A	LTR/ERVK	0.0786363	0.459383	0.70186	-0.0573353	0.572226	0.675958
IAPEY3C	LTR/ERVK	-0.134488	0.466052	0.708151	-0.3963	0.0732706	0.133295
MER88	LTR/ERVL	0.24716	0.466356	0.708151	-0.881514	0.0266234	0.0553336
ORR1C1	LTR/ERVL-MaLR	-0.0749902	0.466411	0.708151	0.0048404	0.959435	0.97451
ERVB3_1-LTR	LTR/ERVK	0.108061	0.46706	0.708151	-0.0498564	0.830995	0.882031
MIRc	SINE/MIR	-0.0723654	0.468486	0.708308	-0.356896	0.00174958	0.00532917
LTR87	LTR/ERVL?	0.0840081	0.469507	0.708308	-0.515994	0.00219013	0.00652117
L1Md_F2	LINE/L1	-0.0796133	0.469832	0.708308	0.34752	0.164229	0.258028
MER34	LTR/ERV1	0.0952952	0.472638	0.71119	0.0140903	0.910004	0.944859
L1MB5	LINE/L1	0.0816087	0.474248	0.711787	-0.335248	0.000174945	0.000675151
RMER10B	LTR/ERVL	-0.0858665	0.474823	0.711787	-0.363297	0.00074893	0.00251223
X5B_LINE	LINE/CR1	0.132685	0.478235	0.715554	-0.667033	0.00756352	0.0186161
LTR80B	LTR/ERVL	0.264126	0.480959	0.718281	-0.114875	0.744801	0.811119
RLTR13D5	LTR/ERVK	0.0825551	0.483462	0.720667	0.647977	9.78711e-09	8.84176e-08
L1MA9	LINE/L1	0.0773477	0.488113	0.726239	-0.0185137	0.87325	0.916628
MTE2b	LTR/ERVL-MaLR	0.0713317	0.491021	0.729203	-0.0626436	0.522528	0.629409
L2a	LINE/L2	-0.0651388	0.493438	0.731172	-0.424758	8.97487e-05	0.000373561
RLTR16B_MM	LTR/ERVK	0.113931	0.494287	0.731172	0.0339143	0.844388	0.893859
ERVB7_4-LTR	LTR/ERVK	-0.117667	0.495102	0.731172	-0.0609809	0.804579	0.860889
L2	LINE/L2	-0.0666758	0.499269	0.73449	-0.360536	0.000882098	0.00288587
MER90	LTR/ERV1	0.129276	0.500252	0.73449	-0.440013	0.0367363	0.0724699
B2_Mm1a	SINE/B2	-0.138213	0.501126	0.73449	0.980051	4.37376e-06	2.58378e-05
RLTR13D1	LTR/ERVK	-0.118611	0.501686	0.73449	0.0910853	0.704508	0.78279
B2_Mm1t	SINE/B2	-0.128251	0.501963	0.73449	0.757074	0.000138705	0.000545894
MuLV	LTR/ERV1	-0.096853	0.505291	0.737131	0.582797	0.0089261	0.0215691
RLTR1	LTR/ERV1	-0.420215	0.50562	0.737131	1.44359	0.00892103	0.0215691
MLT1L	LTR/ERVL-MaLR	0.0817022	0.509566	0.741525	0.219217	0.0407153	0.078948
ID_B1	SINE/B4	-0.0580241	0.513719	0.746205	-0.381195	0.00121145	0.00382184
BGLII_C	LTR/ERVK	0.233817	0.515659	0.746621	-0.379744	0.304049	0.419651
LTR109A2	LTR/ERV1	0.4039	0.516484	0.746621	-0.239028	0.60637	0.706839
RMER20C_Mm	LTR/ERVK	-0.0733885	0.516819	0.746621	-0.0435576	0.74178	0.810048
RLTR10C	LTR/ERVK	-0.0874553	0.518215	0.747175	1.22276	0.00527775	0.0137568
RLTR13A1	LTR/ERVK	-0.0963249	0.520718	0.747175	0.894959	1.18837e-05	6.25664e-05
IAPEY4	LTR/ERVK	-0.115338	0.520721	0.747175	-1.22853	0.000133628	0.000528527
MLT1J	LTR/ERVL-MaLR	0.0715971	0.520957	0.747175	-0.177493	0.0320646	0.064535
LTR90B	LTR	0.195643	0.524091	0.748729	-0.279533	0.355755	0.477568
L1M5	LINE/L1	0.0659489	0.525375	0.748729	-0.29635	0.00534396	0.0138838
LTRIS_Mm	LTR/ERV1	0.0764266	0.526364	0.748729	0.697115	8.93439e-07	6.17638e-06
IAPA_MM	LTR/ERVK	-0.137462	0.52642	0.748729	0.64134	0.00234235	0.00687148
MER92B	LTR/ERV1	-0.0757653	0.526744	0.748729	-1.03558	3.3766e-05	0.00015884
L1MDa	LINE/L1	0.0910052	0.532472	0.753308	0.0581748	0.551609	0.656481
X7D_LINE	LINE/CR1	-0.435991	0.534044	0.753308	-0.64921	0.343837	0.464882
MER74A	LTR/ERVL	0.0742841	0.534329	0.753308	-0.0593953	0.644687	0.739576
HAL1	LINE/L1	0.0697001	0.535428	0.753308	-0.411191	1.64818e-06	1.06529e-05
L1ME5	LINE/L1	-0.125404	0.535536	0.753308	-0.147272	0.575119	0.678368
MT2B	LTR/ERVL	-0.0764601	0.535643	0.753308	0.32395	0.00307766	0.00870726
MT2B	LTR/ERVL-MaLR	-0.0764601	0.535643	0.753308	0.32395	0.00307766	0.00870726
ORR1E	LTR/ERVL-MaLR	-0.0569815	0.53758	0.754698	-0.00926828	0.929248	0.955166
ERVB4_2-LTR	LTR/ERVK	-0.148957	0.538603	0.754802	2.22133	1.90455e-16	3.09003e-15
RLTR40	LTR/ERVK	0.0841581	0.539689	0.754996	-0.0203612	0.841648	0.892147
RLTR45	LTR/ERVK	-0.116882	0.541813	0.756636	1.48214	7.73311e-38	2.92753e-36
L1P5	LINE/L1	0.146854	0.546788	0.760614	-0.0646659	0.809865	0.864218
MLT1A0	LTR/ERVL-MaLR	0.0665021	0.548153	0.760614	0.0929336	0.329431	0.447689
ORR1B1	LTR/ERVL	0.0557582	0.548455	0.760614	0.0784741	0.438933	0.555656
ORR1B1	LTR/ERVL-MaLR	0.0557582	0.548455	0.760614	0.0784741	0.438933	0.555656
BGLII_Mur	LTR/ERVK	-0.0909613	0.548483	0.760614	-0.112454	0.367102	0.484992
LTR31	LTR/ERV1	-0.0800417	0.552176	0.764404	-0.124585	0.479729	0.589466
RMER6B	LTR/ERVK	0.0675447	0.554805	0.764907	0.190144	0.0472318	0.0902627
MamGypLTR1c	LTR/Gypsy	0.164634	0.555212	0.764907	-0.909972	0.0114989	0.0264806
FAM	SINE/Alu	-0.113259	0.55675	0.764907	-0.160948	0.49722	0.605433
IAP1MM	LTR/ERVK	-0.12472	0.557322	0.764907	-0.138173	0.656472	0.746631
MER57	LTR/ERV1	0.152121	0.557344	0.764907	-0.168884	0.471797	0.584235
MamRep1151	LTR?	0.141369	0.561357	0.767048	-0.104749	0.664685	0.752742
RLTR10B2	LTR/ERVK	0.0872837	0.562185	0.767048	0.742597	2.65823e-05	0.00013045
MER76	LTR/ERVL	-0.0980309	0.562686	0.767048	0.206174	0.235481	0.342871
MER77	LTR/ERVL	0.0616515	0.563608	0.767048	0.362248	0.00264817	0.00768355
RLTR20A2B_MM	LTR/ERVK	0.103548	0.564435	0.767048	-0.36498	0.0413052	0.079897
ORR1D1	LTR/ERVL-MaLR	-0.057626	0.564686	0.767048	-0.229263	0.025731	0.053974
ID4	SINE/ID	-0.05676	0.565856	0.767328	-0.447918	6.92353e-05	0.000295925
RLTR15	LTR/ERVK	-0.0637542	0.56847	0.769561	-0.0109159	0.910593	0.944859
RMER16B3	LTR/ERVK	0.186588	0.569452	0.769582	0.0283111	0.926134	0.953726
MER89	LTR/ERV1	-0.0683433	0.573412	0.772252	1.84421	4.0756e-33	1.35004e-31
B1F	SINE/Alu	-0.0507954	0.573514	0.772252	-0.406931	0.000326303	0.00118453
MurERV4	LTR/ERVK	0.0700402	0.574338	0.772252	-0.184508	0.0965578	0.168341
RLTR11C_MM	LTR/ERVK	-0.0615199	0.578792	0.775692	0.0401931	0.74397	0.811119
L1ME3F	LINE/L1	0.0786341	0.578846	0.775692	0.0273634	0.862987	0.909953
RLTR30D_MM	LTR/ERV1	0.07339	0.581015	0.776083	-0.336053	0.0678745	0.124047
RNLTR23	LTR/ERVK	0.211941	0.582163	0.776083	-1.09498	0.0348852	0.0695082
MLTR25C	LTR/ERVK	0.066815	0.58355	0.776083	0.121359	0.382085	0.498781
RLTR28	LTR/ERVL	-0.0777093	0.583694	0.776083	-0.225544	0.0160639	0.035974
MER77B	LTR/ERVL	-0.0745397	0.584012	0.776083	-0.0470705	0.707604	0.784581
RLTR24B_MM	LTR/ERV1	-0.055403	0.5945	0.787215	-0.15454	0.257022	0.369499
LTR108d_Mam	LTR/ERVL	0.238394	0.596394	0.787215	-0.338067	0.535677	0.641361
LTR107_Mam	LTR	0.112405	0.596924	0.787215	-0.692426	0.00274155	0.00786836
MLTR18A_MM	LTR/ERVK	-0.0697462	0.597147	0.787215	0.369094	0.00417436	0.0112495
RLTR20A2	LTR/ERVK	0.0911653	0.597334	0.787215	0.392486	0.00747349	0.0184516
ERVB5_1-LTR	LTR/ERVK	-0.141379	0.598662	0.78766	1.17941	2.12497e-07	1.65623e-06
MTE	LTR/ERVL-MaLR	0.0562097	0.602233	0.789046	-0.0962474	0.262287	0.375709
RLTR9C	LTR/ERVK	-0.0861397	0.602461	0.789046	-0.000287278	0.998953	0.998953
MLT2B2	LTR/ERVL	0.0574737	0.603344	0.789046	0.0476189	0.705003	0.78279
X5A_LINE	LINE/CR1	-0.226859	0.604195	0.789046	-0.711674	0.0895306	0.158171
LTR40c	LTR/ERVL	-0.0789076	0.604671	0.789046	-0.655085	0.000222084	0.000832815
RLTR13B1	LTR/ERVK	0.0901354	0.612024	0.797334	0.90431	8.18921e-22	2.03451e-20
L1M3de	LINE/L1	-0.14319	0.614555	0.799323	-0.310326	0.11928	0.197889
RMER12	LTR/ERVK	-0.0556308	0.616472	0.800508	-0.0298471	0.724303	0.797536
RLTR12B2	LTR/ERVK	0.0966978	0.618531	0.801874	-0.223083	0.25637	0.369229
RLTR9A	LTR/ERVK	-0.0581308	0.622204	0.805325	-0.0444132	0.747156	0.812571
B4	SINE/B4	-0.0438332	0.625656	0.80568	-0.304897	0.00654389	0.0166211
L1_Rod	LINE/L1	0.0561081	0.626075	0.80568	0.136036	0.282711	0.397797
MTA_Mm	LTR/ERVL	-0.0533769	0.626244	0.80568	0.644548	2.63309e-06	1.64828e-05
MTA_Mm	LTR/ERVL-MaLR	-0.0533769	0.626244	0.80568	0.644548	2.63309e-06	1.64828e-05
L1MD1	LINE/L1	0.0573763	0.626528	0.80568	-0.263701	0.0144804	0.0327044
MLT1C	LTR/ERVL-MaLR	0.0536748	0.628757	0.806159	-0.103821	0.228329	0.333679
MLTR32C_MM	LTR/ERVK	-0.0870341	0.630068	0.806159	0.223911	0.218479	0.322247
L1MD3	LINE/L1	0.0617944	0.630132	0.806159	-0.396641	0.000210731	0.000797767
Lx9	LINE/L1	0.0458334	0.630951	0.806159	0.117667	0.363031	0.48275
ERVB5_2LTR	LTR/ERVK	0.209103	0.632739	0.807147	0.706733	0.2948	0.412243
LTR16B2	LTR/ERVL	0.0956534	0.634225	0.807262	0.0878432	0.687648	0.771058
MER68B	LTR/ERVL	-0.0581281	0.634857	0.807262	-0.485521	0.000807032	0.0026512
X7B_LINE	LINE/CR1	-0.055791	0.640107	0.812078	-0.850372	9.32781e-10	9.26952e-09
Lx6	LINE/L1	-0.0545442	0.640685	0.812078	0.287112	0.0212819	0.0462272
LTR81B	LTR/Gypsy	0.0956871	0.641866	0.812282	-0.231077	0.383966	0.500415
RLTR10D2	LTR/ERVK	0.0749405	0.644309	0.814079	0.520007	0.00671219	0.0168867
LTR75B	LTR/ERVL	0.13108	0.650445	0.819308	-0.787053	0.020005	0.0438125
RLTR46B	LTR/ERVK	-0.122169	0.650506	0.819308	0.397153	0.194834	0.295034
ORR1B2	LTR/ERVL-MaLR	-0.0449437	0.65723	0.82647	-0.134907	0.15583	0.247276
Lx2B2	LINE/L1	-0.0486783	0.658932	0.827303	0.374068	0.000108762	0.000443413
MLT1H1	LTR/ERVL-MaLR	0.0490078	0.660431	0.827878	0.305648	0.0527366	0.0991148
ERVB4_1I	LTR/ERVK	0.0533401	0.661836	0.828336	0.481592	0.000313957	0.00115021
RLTR14	LTR/ERV1	0.0473246	0.666568	0.832949	0.646619	1.579e-11	1.93124e-10
RLTR1D2_MM	LTR/ERV1	-0.059221	0.670139	0.835756	0.18321	0.365933	0.484861
ORR1D2	LTR/ERVL-MaLR	0.0412203	0.672344	0.835756	-0.0428466	0.673031	0.757874
RLTR22_Mus	LTR/ERVK	0.0439822	0.672642	0.835756	-0.242638	0.0238476	0.0509502
ORR1A2	LTR/ERVL	0.0392774	0.673015	0.835756	0.449254	2.74426e-05	0.000133846
ORR1A2	LTR/ERVL-MaLR	0.0392774	0.673015	0.835756	0.449254	2.74426e-05	0.000133846
MLTR31D_MM	LTR/ERVK	-0.0570143	0.674315	0.836066	-0.132891	0.523938	0.630152
RLTR13C2	LTR/ERVK	-0.0425553	0.676027	0.836885	0.260315	0.0267084	0.0553336
ORR1A4	LTR/ERVL	0.0454434	0.678941	0.839179	-0.239534	0.0222313	0.0480268
ORR1A4	LTR/ERVL-MaLR	0.0454434	0.678941	0.839179	-0.239534	0.0222313	0.0480268
RLTR30E_MM	LTR/ERV1	0.0446396	0.68006	0.839179	-0.316797	0.026792	0.0553336
RMER17C	LTR/ERVK	-0.0470301	0.681043	0.839179	0.328633	0.00115042	0.00364378
RLTR10D	LTR/ERVK	-0.0499841	0.683647	0.839834	0.265175	0.275719	0.392123
RLTR31B_Mm	LTR/ERVK	-0.0565126	0.683684	0.839834	-0.376044	0.0249916	0.0528413
LTR16B	LTR/ERVL	0.0893961	0.68483	0.839945	0.259539	0.296227	0.412436
MERV1_I	LTR/ERV1	-0.0568537	0.686152	0.840272	0.98597	1.03112e-17	2.04436e-16
UCON13	LINE?/Penelope?	0.318326	0.688125	0.841394	-0.479127	0.468791	0.582326
RLTR20A4	LTR/ERVK	0.0443613	0.690527	0.842164	-0.291978	0.00154515	0.00476122
LTR81C	LTR/Gypsy	-0.074686	0.691521	0.842164	0.535907	0.00149435	0.00462259
LTR90A	LTR	0.218361	0.691928	0.842164	-0.0953295	0.78591	0.844322
L1MB2	LINE/L1	0.0435841	0.693494	0.842781	-0.458426	4.95945e-07	3.61722e-06
LTR45	LTR/ERV1	-0.113997	0.69505	0.843383	0.12576	0.654447	0.745394
ERVLB4	LTR/ERVL	-0.0383614	0.700639	0.846639	2.05808	2.60231e-66	3.44805e-64
IAPEY	LTR/ERVK	-0.0491606	0.70092	0.846639	0.657368	1.11071e-06	7.4832e-06
MLTR31FA_MM	LTR/ERVK	0.0403637	0.70133	0.846639	-0.222761	0.143208	0.229075
RLTR30D2_MM	LTR/ERV1	0.0827626	0.70225	0.846639	-0.32878	0.00580335	0.0149794
LTRIS4	LTR/ERV1	-0.0676972	0.703922	0.846639	-0.152208	0.43158	0.547567
RLTR48C	LTR/ERV1	0.0926532	0.704717	0.846639	0.046508	0.826141	0.878181
RMER4A	LTR/ERVK	0.0413716	0.705178	0.846639	-0.485735	1.03647e-07	8.32315e-07
RMER12B	LTR/ERVK	-0.0454323	0.708557	0.849415	-0.12023	0.305539	0.420977
MamGypLTR2b	LTR/Gypsy	-0.115442	0.710738	0.850748	-0.190445	0.623627	0.720979
PB1D11	SINE/Alu	-0.0334759	0.715276	0.854894	-0.445323	2.07396e-05	0.000105019
LTR50	LTR/ERV1	-0.0719945	0.722137	0.861801	-0.284642	0.0767549	0.138482
LTR50	LTR/ERVL	-0.0719945	0.722137	0.861801	-0.284642	0.0767549	0.138482
LTR50	LTR/ERVL-MaLR	-0.0719945	0.722137	0.861801	-0.284642	0.0767549	0.138482
LTR84b	LTR/ERVL	0.0651062	0.726573	0.861983	0.0827488	0.695689	0.775698
MER131	SINE?	-0.0396902	0.727019	0.861983	0.0204865	0.893276	0.933186
RLTR12BD_Mm	LTR/ERVK	-0.0379573	0.727063	0.861983	-0.0765355	0.417868	0.535214
RLTR35B_MM	LTR/ERVL	0.0612649	0.728763	0.861983	0.0882907	0.60318	0.704153
ERVB4_3I	LTR/ERVK	0.0844323	0.729335	0.861983	1.21983	2.81516e-05	0.000136466
HAL1M8	LINE/L1	0.0349721	0.730058	0.861983	-0.388377	0.000416362	0.00148434
RLTR9A3	LTR/ERVK	0.0464534	0.731818	0.861983	0.990996	4.61234e-15	6.66693e-14
Lx4B	LINE/L1	-0.0403215	0.731996	0.861983	0.502499	1.47441e-07	1.17216e-06
MLT1D	LTR/ERVL-MaLR	-0.0366792	0.732036	0.861983	-0.0294276	0.740453	0.810048
Lx8b	LINE/L1	0.0361636	0.734132	0.862338	0.168564	0.167281	0.260762
MER92D	LTR/ERV1	0.170701	0.734504	0.862338	0.522378	0.475297	0.587653
RLTR13D6	LTR/ERVK	-0.0331133	0.737602	0.8647	0.915817	6.25989e-18	1.27605e-16
ETnERV2	LTR/ERVK	0.0456398	0.741513	0.867449	0.104965	0.389431	0.505879
LTR48	LTR/ERV1	0.033489	0.742127	0.867449	-0.227365	0.0894174	0.158171
MTE2a	LTR/ERVL-MaLR	0.0315044	0.743755	0.868078	0.0323612	0.739219	0.810048
RLTR19C	LTR/ERVK	0.0380403	0.747253	0.870883	-0.401412	0.00268837	0.00777182
L1ME3A	LINE/L1	0.0379667	0.748718	0.871315	-0.212882	0.0310582	0.0628276
RMER13A	LTR/ERVK	0.0346872	0.750038	0.871459	0.148358	0.224854	0.329206
L1_Mus4	LINE/L1	0.0361388	0.751447	0.871459	0.563946	3.18083e-06	1.93035e-05
L1M4a1	LINE/L1	0.0563754	0.753597	0.871459	-0.225689	0.0944465	0.16575
MTC	LTR/ERVL-MaLR	-0.0358218	0.754307	0.871459	-0.121834	0.279725	0.394294
RLTR6	LTR/ERV1	-0.0415906	0.754316	0.871459	0.297187	0.00701263	0.0174766
Lx	LINE/L1	-0.0300722	0.757862	0.873511	0.500169	7.05783e-06	3.89651e-05
MLT1E1A	LTR/ERVL-MaLR	-0.0316383	0.758286	0.873511	-0.0823921	0.388215	0.505124
ORR1G	LTR/ERVL-MaLR	0.0329167	0.764876	0.879829	-0.00883784	0.915588	0.947776
L1M4	LINE/L1	-0.0309749	0.768585	0.880842	-0.258583	0.0221373	0.047954
MTEb	LTR/ERVL-MaLR	-0.0313398	0.769555	0.880842	0.0396197	0.670869	0.756549
ERVB4_3-LTR	LTR/ERVK	-0.137079	0.770639	0.880842	0.392646	0.38131	0.498588
Lx10	LINE/L1	0.0350956	0.770706	0.880842	0.119112	0.295095	0.412243
RLTR34C_MM	LTR/ERVK	-0.0351195	0.772037	0.880842	0.0142076	0.925917	0.953726
B1_Mur2	SINE/Alu	-0.0264033	0.772397	0.880842	-0.450115	5.96303e-05	0.00025905
RLTR14_RN	LTR/ERV1	-0.0351833	0.774603	0.882095	-0.139552	0.137395	0.221112
RLTR13D	LTR/ERVK	-0.106937	0.781637	0.887792	0.957008	0.00593763	0.0152764
L3b	LINE/CR1	-0.0369741	0.781837	0.887792	-0.431016	6.72176e-05	0.000288854
MLTR31F_MM	LTR/ERVK	-0.0312409	0.784982	0.890094	0.383214	0.00553956	0.0143451
RMER13A2	LTR/ERVK	-0.029232	0.79012	0.892952	0.129673	0.147745	0.235385
RMER12C	LTR/ERVK	0.0298641	0.790762	0.892952	-0.147787	0.138182	0.221929
MamRep605	LTR?	0.0288302	0.790868	0.892952	-0.445479	0.000776329	0.00258235
IAPEY5	LTR/ERVK	-0.0895871	0.794691	0.895998	0.355906	0.375512	0.493074
L1M2b	LINE/L1	-0.0457394	0.797925	0.898371	-0.904708	0.00312503	0.00880993
LTR86A2	LTR/ERVL	0.113915	0.799302	0.89865	1.91817	8.5932e-07	5.99262e-06
L1MC	LINE/L1	-0.031676	0.801384	0.89972	-0.170197	0.105965	0.181165
L2b	LINE/L2	0.024446	0.805256	0.902794	-0.375711	0.000154319	0.000604351
RLTR51B_Mm	LTR/ERVK?	0.0284392	0.8077	0.90426	0.14253	0.339574	0.460685
LTR28B	LTR/ERV1	0.0547303	0.810508	0.90613	0.00817092	0.972286	0.97968
RLTR17C_Mm	LTR/ERVK	-0.0739972	0.811782	0.906282	-0.368863	0.107548	0.183007
MTEa	LTR/ERVL-MaLR	-0.0222999	0.815026	0.908629	0.0924272	0.367252	0.484992
LTR86A1	LTR/ERVL	0.0577729	0.819043	0.91183	0.627914	0.00337297	0.00934323
L1Md_F3	LINE/L1	0.0237331	0.823037	0.913836	0.502119	0.00995202	0.0236175
RMER16A3	LTR/ERVK	-0.0381832	0.823141	0.913836	-0.116793	0.429657	0.546524
MER65D	LTR/ERV1	0.0529725	0.827036	0.916881	0.866019	0.00414297	0.0112029
MER50	LTR/ERV1	0.0315593	0.83121	0.919873	0.116238	0.589801	0.690562
RMER16B2	LTR/ERVK	-0.0255243	0.832046	0.919873	0.525804	0.000155978	0.000607856
L1ME1	LINE/L1	0.0222161	0.840231	0.927445	-0.298969	0.00969185	0.023278
MYSERV6	LTR/ERVK	0.0241399	0.841225	0.927445	0.403999	5.29142e-06	3.02639e-05
Lx2A	LINE/L1	-0.0255849	0.843836	0.929037	1.1451	3.15565e-21	7.37864e-20
RLTR13A	LTR/ERVK	-0.0277138	0.846793	0.929482	-0.000615583	0.997349	0.998605
RSINE1	SINE/B4	-0.0169839	0.84787	0.929482	-0.401219	0.000515328	0.00179025
L1_Mus1	LINE/L1	-0.018796	0.848936	0.929482	0.262559	0.0225034	0.0483518
MLT1J1	LTR/ERVL-MaLR	-0.0217991	0.849058	0.929482	0.112161	0.353777	0.475893
X7C_LINE	LINE/CR1	0.0378861	0.851991	0.929482	1.9546	2.92645e-22	7.7551e-21
MLT1E1	LTR/ERVL-MaLR	-0.021796	0.852589	0.929482	-0.143371	0.291778	0.409829
IAPLTR2a2_Mm	LTR/ERVK	-0.0214956	0.852994	0.929482	0.788042	8.27977e-17	1.46276e-15
MER87	LTR/ERV1	0.059237	0.855241	0.929482	-0.170741	0.650343	0.742849
ORR1A3	LTR/ERVL	0.0199083	0.856466	0.929482	0.831785	1.05433e-17	2.04436e-16
ORR1A3	LTR/ERVL-MaLR	0.0199083	0.856466	0.929482	0.831785	1.05433e-17	2.04436e-16
ID	SINE/ID	0.0191774	0.857067	0.929482	-0.469246	5.79274e-07	4.18657e-06
MERVL_2A	LTR/ERVL	-0.0194772	0.857085	0.929482	2.12442	5.81773e-50	3.55777e-48
RLTR31B2	LTR/ERVK	0.0184643	0.86011	0.930316	-0.294821	0.00464674	0.0123138
MLT1F2	LTR/ERVL-MaLR	-0.019512	0.861218	0.930316	-0.0627549	0.539293	0.644719
LFSINE_Vert	SINE/tRNA	-0.0250714	0.862518	0.930316	-0.594165	0.00601198	0.0154178
RMER16B	LTR/ERVK	0.0473884	0.862529	0.930316	-0.317319	0.132673	0.215255
L1M2c	LINE/L1	-0.0356748	0.864498	0.930709	-0.238842	0.141297	0.226474
RLTR31D_MM	LTR/ERVK	0.0187476	0.865709	0.930709	-0.493149	1.41254e-06	9.28074e-06
L1MEa	LINE/L1	0.0424245	0.866401	0.930709	-0.648111	0.00183349	0.0055213
L1M3b	LINE/L1	0.0425996	0.871603	0.935035	-0.279308	0.424194	0.541306
IAPd	LTR/ERVK	-0.0331225	0.876359	0.938872	0.586377	0.0103791	0.0244124
RLTR10B	LTR/ERVK	-0.0237416	0.882882	0.943723	1.31653	4.6802e-14	6.52764e-13
LTR103_Mam	LTR/ERV1?	0.0776337	0.883259	0.943723	0.309864	0.661474	0.751245
LTR65	LTR/ERV1	0.0202904	0.888007	0.946285	-0.679412	0.000112952	0.00045582
L1MEg2	LINE/L1	0.0349488	0.889679	0.946285	0.843114	0.000216301	0.000814973
Lx5c	LINE/L1	0.0143077	0.890051	0.946285	0.0785301	0.400089	0.518876
L4_C	LINE/RTE-X	-0.0184135	0.890411	0.946285	-0.259045	0.0480594	0.0914048
LTR16E1	LTR/ERVL	-0.0190664	0.893496	0.947431	0.723279	3.30834e-05	0.000156555
RLTR20C1_MM	LTR/ERVK	-0.0162802	0.89387	0.947431	-0.0789415	0.464733	0.579096
Lx5b	LINE/L1	-0.0146608	0.895091	0.947463	0.478115	3.23039e-07	2.44587e-06
L1M4c	LINE/L1	0.0163248	0.897782	0.949049	-0.432109	0.000103997	0.000427927
L1VL4	LINE/L1	-0.013642	0.903789	0.954133	0.610365	9.98739e-08	8.18554e-07
RLTR25B	LTR/ERVK	-0.0131306	0.906534	0.954613	0.298302	0.000996038	0.0032189
RLTR41B	LTR/ERV1	-0.0220386	0.906642	0.954613	1.07404	7.73218e-06	4.21033e-05
RLTR1B	LTR/ERV1	0.0121941	0.910223	0.957117	-0.559274	0.0951462	0.166611
MLT1	LTR/ERVL-MaLR	-0.0141284	0.912974	0.957827	-0.388752	0.0131084	0.0300323
L1MA8	LINE/L1	0.0130037	0.913305	0.957827	-0.201114	0.0324461	0.0651381
RLTR10A	LTR/ERVK	-0.0114192	0.916207	0.959065	-0.237653	0.059238	0.109777
RLTR43C	LTR/ERVK	0.0204356	0.916895	0.959065	1.19897	5.79018e-10	5.90153e-09
RMER2	LTR/ERV1	-0.0116517	0.919501	0.960529	1.45645	6.39057e-42	2.8225e-40
RLTR13D3A	LTR/ERVK	0.0150425	0.921341	0.961189	-0.287299	0.163302	0.25708
L1_Mur2	LINE/L1	-0.0103458	0.923828	0.962184	0.75019	5.79761e-11	6.87925e-10
RLTR13C3	LTR/ERVK	0.0113396	0.925798	0.962184	0.113713	0.485044	0.595077
MLTR11B	LTR/ERVK	-0.0115709	0.927269	0.962184	-0.0215821	0.808555	0.86398
MTB_Mm	LTR/ERVL-MaLR	-0.0100723	0.927953	0.962184	-0.165319	0.0573365	0.106751
RLTR28B	LTR/ERVL	-0.0128283	0.928338	0.962184	0.256127	0.0768184	0.138482
MURVY	LTR/ERV1	0.0097548	0.931665	0.964376	0.221808	0.0252168	0.0531759
LTR82B	LTR/ERVL	0.0200677	0.933086	0.964593	0.830705	0.00143306	0.00446778
MER74C	LTR/ERVL	-0.0237986	0.937688	0.966384	1.25234	0.00138607	0.0043383
MTD	LTR/ERVL	0.00710555	0.939756	0.966384	-0.0607103	0.582433	0.682942
MTD	LTR/ERVL-MaLR	0.00710555	0.939756	0.966384	-0.0607103	0.582433	0.682942
Lx2A1	LINE/L1	-0.00869058	0.940575	0.966384	1.25837	1.2224e-21	2.94486e-20
RLTR11D	LTR/ERVK	-0.0108669	0.940834	0.966384	-0.484624	0.000110622	0.000448697
LTR55	LTR/ERVL?	-0.0151077	0.940889	0.966384	-0.294043	0.301105	0.417764
MT	LTR/ERVL-MaLR	0.00585451	0.955743	0.979369	1.72294	3.49441e-38	1.38903e-36
LTR73	LTR/ERV1	-0.011001	0.955992	0.979369	-0.30854	0.218298	0.322247
ERVB5_2-LTR	LTR/ERVK	-0.00812837	0.960203	0.981765	-0.0919103	0.670902	0.756549
RLTR20C	LTR/ERVK	0.00895548	0.960798	0.981765	-0.671842	3.18964e-05	0.000151842
RMER6BA	LTR/ERVK	-0.00519693	0.963137	0.982894	0.55935	2.88448e-06	1.77764e-05
LTR41	LTR/ERVL	-0.00498321	0.970164	0.985645	-0.235728	0.0563914	0.105485
MIR3	SINE/MIR	0.00380401	0.970572	0.985645	-0.331003	0.00328918	0.00917508
L1_Mus3	LINE/L1	-0.00344103	0.971312	0.985645	0.588446	6.35568e-06	3.55829e-05
MERVK26	LTR/ERVK	-0.00497478	0.971692	0.985645	-0.00918489	0.934007	0.956875
L1M4b	LINE/L1	0.00409142	0.972024	0.985645	-0.229535	0.0265893	0.0553336
RMER17C2	LTR/ERVK	0.00389486	0.973871	0.986261	0.125601	0.204404	0.306029
LTR108b_Mam	LTR/ERVL	0.0095158	0.975391	0.986545	0.634171	0.112088	0.189357
RLTR6_Mm	LTR/ERV1	0.00328025	0.977248	0.987105	0.0711969	0.632494	0.728744
Lx8	LINE/L1	-0.00260459	0.978424	0.987105	0.0375443	0.739053	0.810048
MLT1E2	LTR/ERVL-MaLR	-0.00292582	0.981386	0.98884	-0.0700719	0.424047	0.541306
RLTR49	LTR/ERVK	-0.0028763	0.986257	0.992491	-0.0887721	0.470574	0.58363
MLT2B3	LTR/ERVL	-0.000575903	0.995415	0.998973	0.395721	0.000264397	0.000977654
ORR1C2	LTR/ERVL-MaLR	0.000406241	0.996793	0.998973	-0.206427	0.0345853	0.0690837
LTR16E2	LTR/ERVL	0.000611635	0.997848	0.998973	0.542858	0.00468542	0.0123751
Lx3_Mus	LINE/L1	-0.000230742	0.998512	0.998973	0.725522	4.55416e-11	5.48569e-10
RLTR20B4_MM	LTR/ERVK	-0.000197503	0.998973	0.998973	-0.54934	0.000370926	0.00134039
