# Supplementary material for: ATR expands embryonic stem cell fate potential in response to replication stress
Source: eLife. 2020 Mar 12;9:e54756. doi: 10.7554/eLife.54756 (PMC7067586; doi:10.7554/eLife.54756)
Supplement: Supplementary file 6. [file elife-54756-supp6.xlsx]

## Sheet: Summery
Supplementary Table 6. List of Dux activators and supressors based on screening experiment
Activators	FC (APH-SC/APH-KD)	Supressors	FC (CNT-KD/ CNT-SC)	FC (CNT-KD/ ATR-KD)
Dux	7.23933	Rbm10	24.8708	1.49554
Mcm7	4.92068	Snrnp200	24.0291	1.99354
Sp1	3.62469	Prpf8	14.615	2.35164
Id2	3.48266	Eftud2	7.20357	1.63354
Gm6763	3.41809	Sf3a1	6.60265	0.924023
Pnisr	3.0621	Matr3	4.8862	2.34134
Tpr	3.05081	Sart1	4.23212	1.35692
Tom1l2	2.9043	Ncl	3.99182	1.13158
Dhx9	2.50624	Stat3	3.80715	1.22944
Atr	2.46091	Fkbp5	3.45028	2.03214
Trp53bp1	2.36557	Hnrnpf	3.43437	4.01853
Rbm15	2.32924	Smc1a	3.40671	1.3673
Zscan4c	2.29611	Ebna1bp2	3.20142	1.29116
Gm4981	2.22714	Etaa1	3.14206	2.10089
Elof1	2.1148	Rfc2	2.99532	3.32265
Tlk1	2.03946	Mcm7	2.92962	1.29864
Egr1	2.00489	Ik	2.92151	0.941914
Tlk2	1.96863	Vcp	2.80509	0.510978
Npas2	1.94827	Foxo1	2.6902	1.8184
Hnrnpm	1.89981	Rfwd3	2.60517	2.28892
Hist1h1c	1.77833	Foxk1	2.57882	1.10957
Hnrnpf	1.77259	Ahnak	2.56219	1.76541
		Mycbp2	2.47434	1.30134
		Ror1	2.38454	2.51577
		Lmnb2	2.25904	1.98252
		Prpf38b	2.25852	1.22462
		Setdb1	2.24396	1.05824
		Nrf1	2.22383	0.862741
		E2f8	2.09901	1.17148
		Tpr	2.06534	1.78344
		Ewsr1	2.05724	1.05482
		Pspc1	1.94627	0.113361
		Tfdp1	1.86139	2.6494

## Sheet: un-treated
Targets	Well	Replicate 1-CNTL	Replicate 2-CNTL	Replicate 3-CNTL	SD	AVG Ct Zscan4	AVG Ct GAPDH	2^(delta CT)	FC CNTL-KD/CNTL-SC
Rbm10	F20	24.037	24.316	23.463	0.434919	23.9387	17.2873	0.00994831	24.8708
Snrnp200	L14	25.502	25.52	25.5	0.0110151	25.5073	18.8063	0.00961165	24.0291
Prpf8	F16	25.649	25.885	25.254	0.318821	25.596	18.1777	0.005846	14.615
Eftud2	J06	26.16	26.255	25.726	0.282023	26.047	17.608	0.00288143	7.20357
Sf3a1	L10	25.495	25.7	25.984	0.245561	25.7263	17.1617	0.00264106	6.60265
Matr3	D14	25.524	24.785	25.305	0.379579	25.2047	16.2057	0.00195448	4.8862
Sart1	H04	26.476	26.837	26.019	0.409938	26.444	17.2377	0.00169285	4.23212
Ncl	B18	24.999	25.45	24.843	0.315221	25.0973	15.8067	0.00159673	3.99182
Stat3	H12	26.053	26.057	26	0.0318172	26.0367	16.6777	0.00152286	3.80715
Fkbp5	B24	24.7	24.977	24.521	0.229748	24.7327	15.2317	0.00138011	3.45028
Hnrnpf	D04	25.5	25.491	25.655	0.0921973	25.5487	16.041	0.00137375	3.43437
Smc1a	H08	26.752	27.024	26.136	0.45497	26.6373	17.118	0.00136268	3.40671
Ebna1bp2	B18	26.289	26.5	26.723	0.217028	26.504	16.895	0.00128057	3.20142
Etaa1	D24	24.7	24.852	24.689	0.0910988	24.747	15.111	0.00125683	3.14206
Rfc2	B24	24.845	24.709	24.75	0.0697639	24.768	15.063	0.00119813	2.99532
Mcm7	D20	25.117	24.747	25.761	0.513133	25.2083	15.4713	0.00117185	2.92962
Ik	D06	27.265	27.4	27.635	0.187239	27.4333	17.6923	0.0011686	2.92151
Vcp	L22	27.964	27.5	27.096	0.434345	27.52	17.7203	0.00112203	2.80509
Foxo1	J10	26.401	26.6	26.768	0.183718	26.5897	16.7297	0.00107608	2.6902
Rfwd3	D02	25.7	25.835	25.601	0.117461	25.712	15.8057	0.00104207	2.60517
Foxk1	D02	25.902	25.709	26.185	0.239414	25.932	16.011	0.00103153	2.57882
Ahnak	B06	24.974	25.969	26.48	0.765853	25.8077	15.8773	0.00102488	2.56219
Mycbp2	J22	25.502	25.8	26.042	0.270484	25.7813	15.8007	0.000989737	2.47434
Ror1	F24	26	25.158	25.682	0.425179	25.6133	15.5793	0.000953817	2.38454
Lmnb2	J20	26.484	26.565	26.106	0.244992	26.385	16.273	0.000903618	2.25904
Prpf38b	F14	26.346	26.35	26.482	0.0773908	26.3927	16.2803	0.000903409	2.25852
Setdb1	D04	26.891	25.127	26.025	0.882048	26.0143	15.8927	0.000897583	2.24396
Nrf1	F04	25.408	25.189	25.901	0.364681	25.4993	15.3647	0.000889532	2.22383
E2f8	B10	25.638	25.316	25.4	0.167025	25.4513	15.2333	0.000839606	2.09901
Tpr	H16	27.2	27.363	27.119	0.124275	27.2273	16.986	0.000826136	2.06534
Ewsr1	J08	27.1	27.211	27.053	0.0811316	27.1213	16.8743	0.000822897	2.05724
Pspc1	F18	25.9	25.845	26.003	0.080206	25.916	15.589	0.000778508	1.94627
Hp1bp3	J18	26.58	25.118	29.462	2.21034	27.0533	16.7043	0.000766727	1.91682
Tfdp1	D08	26	25.986	26	0.0080829	25.9953	15.604	0.000744555	1.86139
Rora	L08	28.566	27.494	25.436	1.59067	27.1653	16.7483	0.000731426	1.82857
Tcf12	N04	28.371	25.327	26.726	1.52366	26.808	16.3803	0.000726038	1.8151
Atoh1	B04	26.093	25.163	25.451	0.476097	25.569	15.133	0.000721857	1.80464
Creb1	B10	25.24	25.931	26.41	0.588192	25.8603	15.369	0.000694695	1.73674
Ilf2	D08	26.446	26.757	26.212	0.273405	26.4717	15.9583	0.000684181	1.71045
Cd3eap	L24	25.561	26.809	26.834	0.727857	26.4013	15.8613	0.000671651	1.67913
Noc2l	D16	27.58	25.681	25.323	1.21301	26.1947	15.644	0.000666704	1.66676
Parp1	F02	27.133	25.988	25.997	0.658483	26.3727	15.817	0.000664397	1.66099
Rreb1	N02	27.03	25.81	26.945	0.681157	26.595	16.0373	0.000663477	1.65869
Npm1	B20	25.429	25.781	25.6	0.176024	25.6033	15.028	0.000655402	1.6385
Map2k2	B16	25.808	26.751	24.892	0.929533	25.817	15.2367	0.000653134	1.63284
Dlx6	B14	26.266	26.537	26.846	0.290207	26.5497	15.9617	0.000649672	1.62418
Pnn	F10	26.685	27.666	26.787	0.539352	27.046	16.4133	0.000629866	1.57467
Elf1	B20	26.443	25.371	26.352	0.594394	26.0553	15.417	0.000627397	1.56849
Hist1h2aa	B12	25.103	26.893	25.447	0.949855	25.8143	15.122	0.000604348	1.51087
U2surp	L20	27.194	27.509	25.87	0.869724	26.8577	16.1513	0.000598512	1.49628
Chd4	B08	26.992	25.97	26.596	0.515295	26.5193	15.8053	0.000595339	1.48835
Mybbp1a	D24	25.921	27.829	25.798	1.13875	26.516	15.7973	0.000593417	1.48354
Sox1	D20	26.978	25.666	25.445	0.828681	26.0297	15.3023	0.000589863	1.47466
Aff4	B04	26.611	26.627	25.995	0.360355	26.411	15.6577	0.000579327	1.44832
Pnisr	L02	26.385	26.823	27.407	0.512735	26.8717	16.1127	0.000577056	1.44264
Pbrm1	J24	26.784	26.605	27.111	0.256582	26.8333	16.0737	0.00057679	1.44197
Hist1h4h	D14	27.144	25.167	25.806	1.00889	26.039	15.2743	0.000574794	1.43699
Khsrp	D10	26.576	26.529	26.5	0.0383536	26.535	15.7687	0.000574131	1.43533
Ybx1	H22	26.048	27.438	26.928	0.70316	26.8047	16.035	0.000572806	1.43201
Zbtb18	B02	25.526	26.265	27.417	0.952987	26.4027	15.558	0.000543789	1.35947
Atf4	B02	26.077	27.002	25.819	0.62205	26.2993	15.447	0.000540906	1.35227
Smc3	L12	27.7	27.766	27.748	0.0341174	27.738	16.879	0.000538413	1.34603
Dek	B06	25.372	26.844	25.916	0.744301	26.044	15.1467	0.000524295	1.31074
Sin3b	D06	26.277	28.138	25.595	1.31626	26.67	15.747	0.00051505	1.28762
Elof1	B22	26.574	26.833	26.38	0.227276	26.5957	15.6603	0.000510666	1.27666
Parp3	B22	25.422	26.365	26.16	0.49597	25.9823	15.046	0.000510312	1.27578
Donson	B08	25.978	26.736	25.08	0.828986	25.9313	14.9687	0.000501082	1.2527
Sox11	D22	26.85	26.285	26.386	0.301309	26.507	15.52	0.000492701	1.23175
E2f1	B16	27.45	27.249	26.601	0.443679	27.1	16.105	0.000489976	1.22494
Hnrnpa0	B14	25.338	27.009	25.273	0.984053	25.8733	14.869	0.000486817	1.21704
Top2b	H14	27.421	27.218	28.053	0.43548	27.564	16.5317	0.00047746	1.19365
Mcm5	D18	26.37	26.217	29.952	2.11362	27.513	16.4593	0.000470451	1.17613
Thrap3	L16	29.041	26.78	26.934	1.26328	27.585	16.5193	0.000466555	1.16639
Zbtb7a	H24	27.329	26.655	25.763	0.785525	26.5823	15.502	0.000461835	1.15459
Zc3h18	J02	25.697	28.609	28.238	1.58504	27.5147	16.3433	0.000433604	1.08401
Scrambled	H06	28.535	28.134	28.3	0.201487	28.323	17.121	0.000424485	1.06121
Utp3	H20	26.536	27.68	27.972	0.758957	27.396	16.131	0.000406347	1.01587
Rbm15	L06	28.53	28.218	27.985	0.273453	28.2443	16.912	0.000387818	0.969545
Ror2	H02	27.499	26.717	27.918	0.609574	27.378	16.0053	0.000377126	0.942814
Rax	D18	27.772	25.319	27.078	1.26444	26.723	15.2757	0.000358104	0.89526
Hebp1	J14	28.713	29.343	26.883	1.27785	28.313	16.8617	0.000357113	0.892782
Dido1	B12	26.85	26.992	27.07	0.111541	26.9707	15.5137	0.000355713	0.889282
Top1	D10	27.285	27.932	26.142	0.906381	27.1197	15.6347	0.000348876	0.872189
Pds5b	F04	29.029	26.529	28.324	1.289	27.9607	16.4637	0.000345986	0.864964
H1f0	J12	27.641	29.949	28.019	1.23792	28.5363	17.019	0.000341144	0.852859
Mcm3	D16	27.494	26.85	28.619	0.895333	27.6543	16.0733	0.000326416	0.81604
Sp1	H10	28.138	28.25	28.463	0.165095	28.2837	16.6933	0.000324311	0.810778
Lmna	D12	28.25	28.425	28.1	0.16266	28.2583	16.6663	0.000323937	0.809842
Etv1	F06	28.122	26.185	27.181	0.96863	27.1627	15.532	0.00031537	0.788425
Prkdc	F12	26.938	28.304	29.429	1.24744	28.2237	16.584	0.000313409	0.783522
Rfc1	F22	28.242	27.564	28.868	0.652173	28.2247	16.5803	0.000312397	0.780992
Kdm1a	F02	26.614	28.992	25.748	1.6797	27.118	15.46	0.000309451	0.773628
Dhx9	J04	26.646	30.516	28.687	1.93597	28.6163	16.9447	0.000306534	0.766334
E2f7	D12	28.232	26.976	26.533	0.881323	27.247	15.5613	0.000303573	0.758934
Msh6	D22	27.975	27.144	28.054	0.504133	27.7243	15.955	0.000286469	0.716173
Hnrnpm	J16	28.386	28.6	29.015	0.319808	28.667	16.8807	0.000283113	0.707783
Trp53bp1	H18	28.777	28.4	28.241	0.27529	28.4727	16.5653	0.000260337	0.650842
Phf8	F08	29.849	27.596	27.792	1.24804	28.4123	16.378	0.000238399	0.595998
Phax	F06	31.367	27.205	27.87	2.23582	28.814	16.632	0.000215205	0.538013
Rbbp6	L04	27.064	29.417	32.335	2.64054	29.6053	16.77	0.000136829	0.342074

## Sheet: APH-treated
Targets	Well	Replicate 1-APH	Replicate 2-APH	Replicate 3-APH	SD	AVG Ct Zscan4	AVG Ct GAPDH	2^(delta CT)	FC APH-SC/APH-KD
Dux	B18	24.434	24.366	24.853	0.26374	24.551	16.1953	0.00305277	7.23933
Pou5f1	D20	25.176	26.149	27.326	1.07661	26.217	17.9067	0.00315022	7.01539
Mcm7	D20	24.75	24.855	24.707	0.0761337	24.7707	16.972	0.00449125	4.92068
Sp1	H10	25.566	25.598	25.5	0.0499733	25.5547	18.197	0.00609708	3.62469
Id2	D06	24.276	24.3	24.425	0.0800021	24.3337	17.0337	0.00634572	3.48266
Gm6763	F22	23.844	23.969	24.23	0.196953	24.0143	16.7413	0.0064656	3.41809
Mcm5	D18	25.351	24.621	23.656	0.850211	24.5427	17.4103	0.00712777	3.10055
Pnisr	L02	24.951	24.879	24.36	0.322445	24.73	17.6157	0.00721726	3.0621
Tpr	H16	25.93	25.246	24.406	0.76333	25.194	18.085	0.00724399	3.05081
Tom1l2	F04	24.2	24.3	24.439	0.120029	24.313	17.275	0.00760941	2.9043
Dhx9	J04	25.931	25.366	24.394	0.777429	25.2303	18.405	0.008818	2.50624
Atr	B06	23.715	23.883	23.804	0.0840496	23.8007	17.0017	0.00898043	2.46091
Trp53bp1	H18	24.981	24.629	24.192	0.395262	24.6007	17.8587	0.00934234	2.36557
Rbm15	L06	24.8	24.81	24.876	0.0412957	24.8287	18.109	0.00948809	2.32924
Zscan4c	B04	23.586	23.767	23.672	0.0905373	23.675	16.976	0.00962498	2.29611
Gm4981	H20	23.637	23.876	23.7	0.123872	23.7377	17.0827	0.00992305	2.22714
Mcm3	D16	24.161	24.509	23.371	0.583131	24.0137	17.385	0.0101058	2.18685
Elof1	B22	23.318	23.736	22.92	0.408041	23.3247	16.7443	0.0104501	2.1148
Tlk1	H24	22.879	23.334	23.069	0.228528	23.094	16.566	0.0108362	2.03946
Egr1	B20	22.657	22.301	22.848	0.277617	22.602	16.0987	0.011023	2.00489
Tlk2	J02	23.4	23.3	23.552	0.126891	23.4173	16.9403	0.0112261	1.96863
Npas2	D18	22.341	22.554	22.885	0.274125	22.5933	16.1313	0.0113434	1.94827
Trim28	F06	24.345	23.868	23.887	0.270078	24.0333	17.5757	0.0113775	1.94242
Hand1	H04	23.325	23.32	23.485	0.0938527	23.3767	16.947	0.0116005	1.90509
Hnrnpm	J16	25.459	24.794	23.969	0.74643	24.7407	18.315	0.0116327	1.89981
U2surp	L20	23.932	24.088	22.974	0.603199	23.6647	17.3177	0.0122846	1.79899
Top2b	H14	25.106	24.399	23.831	0.638762	24.4453	18.1107	0.0123901	1.78368
Hist1h1c	D04	23.174	23.1	23.31	0.106514	23.1947	16.8643	0.0124274	1.77833
Gm21293	H18	22.671	23.267	23.568	0.456513	23.1687	16.8387	0.0124303	1.77792
Hnrnpf	D04	23.844	24.273	23.314	0.480386	23.8103	17.4847	0.0124676	1.77259
add2	F08	23.818	23.621	23.7	0.0991413	23.713	17.3947	0.0125312	1.7636
Foxo1	J10	23.897	24.946	23.182	0.887254	24.0083	17.702	0.0126359	1.74899
Atm	H14	23.617	23.869	24.367	0.381665	23.951	17.654	0.0127179	1.73771
Lhx4	H08	23.412	22.92	23.834	0.457447	23.3887	17.1003	0.0127945	1.72731
Chd4	B08	23.355	23.647	23.37	0.164427	23.4573	17.2083	0.0131481	1.68085
H2afy2	D02	22.833	22.904	23.311	0.257932	23.016	16.783	0.0132947	1.66231
Elf1	B20	22.83	23.082	22.553	0.264598	22.8217	16.5967	0.0133687	1.65312
Prkdc	F12	24.417	24.583	23.22	0.743655	24.0733	17.8487	0.0133718	1.65274
Dido1	B12	23.478	23.372	22.784	0.373857	23.2113	16.988	0.0133841	1.65121
Msx3	D12	22.539	22.401	23.177	0.413977	22.7057	16.4883	0.0134399	1.64436
Cebpe	F10	23.437	22.908	23.667	0.389192	23.3373	17.1227	0.0134648	1.64132
Ybx1	H22	23.932	24.593	23.203	0.695277	23.9093	17.6957	0.0134741	1.64018
Gm21304	F16	22.912	22.816	23.655	0.4592	23.1277	16.9247	0.0135741	1.6281
Parp1	F02	23.248	23.221	23.693	0.265059	23.3873	17.2097	0.0138146	1.59976
Khsrp	D10	23.442	23.863	22.466	0.716639	23.257	17.081	0.0138305	1.59791
Lmna	D12	24.358	24.093	23.004	0.717573	23.8183	17.647	0.0138753	1.59275
Utp3	H20	24.285	24.639	23.174	0.764402	24.0327	17.866	0.0139203	1.58761
Vcp	L22	26.393	26.951	26.812	0.290473	26.7187	20.5563	0.0139622	1.58285
Phf8	F08	24.03	23.822	23.548	0.241752	23.8	17.6433	0.0140171	1.57664
Rbbp6	L04	24.609	24.678	24.235	0.238358	24.5073	18.3633	0.0141407	1.56286
Nfia	D14	23.012	22.943	23.342	0.213253	23.099	16.9877	0.0144646	1.52787
Kcnh4	D08	23.073	22.474	22.455	0.351446	22.6673	16.5587	0.0144913	1.52505
Rreb1	N02	24.285	23.716	23.008	0.63976	23.6697	17.569	0.0145719	1.51662
Gsdma	H02	22.7	22.864	23.408	0.370607	22.9907	16.8927	0.0145989	1.51382
Fkbp5	B24	22.622	22.997	22.366	0.317365	22.6617	16.5663	0.0146259	1.51102
Nr2e1	H10	23.547	23.115	24.035	0.460284	23.5657	17.4743	0.0146665	1.50684
Foxj2	B22	22.395	22.6	22.775	0.190197	22.59	16.519	0.0148747	1.48575
Stat3	H12	24.435	24.28	23.326	0.600558	24.0137	17.9843	0.0153105	1.44345
Bhlha15	B08	22.838	22.553	22.973	0.214418	22.788	16.777	0.0155063	1.42523
Zbtb18	B02	23.243	23.136	23.144	0.0596015	23.1743	17.1667	0.0155422	1.42194
Mybbp1a	D24	23.22	23.277	22.219	0.595065	22.9053	16.9007	0.0155745	1.41898
Uncx	H12	23.209	22.61	23.688	0.540112	23.169	17.1713	0.0156503	1.41211
Cdx2	B10	22.874	22.638	23.018	0.191847	22.8433	16.8493	0.0156901	1.40853
Mlxipl	D10	23.095	22.439	23.012	0.357201	22.8487	16.8613	0.0157628	1.40204
Nfkb1	D16	22.714	22.771	22.987	0.14401	22.824	16.8443	0.0158468	1.39461
Zbtb7a	H24	23.118	23.15	22.564	0.329478	22.944	17.0043	0.0162923	1.35647
Ror2	H02	23.814	23.709	22.903	0.498428	23.4753	17.5883	0.016898	1.30784
Ror1	F24	23.009	23.099	24.179	0.651076	23.429	17.5443	0.0169254	1.30573
Pnn	F10	23.972	23.878	22.97	0.553369	23.6067	17.7317	0.0170392	1.29701
Serpinb6c	D22	22.137	22.688	22.813	0.359676	22.546	16.6733	0.0170668	1.29491
Rfc1	F22	23.325	24.026	23.947	0.383954	23.766	17.909	0.0172531	1.28093
Ewsr1	J08	24.867	24.713	22.945	1.06799	24.175	18.3443	0.0175709	1.25776
Pspc1	F18	22.922	23.135	22.027	0.587942	22.6947	16.8787	0.0177505	1.24504
Tcf12	N04	23.687	23.794	23.081	0.384503	23.5207	17.7123	0.017845	1.23844
Hebp1	J14	24.848	24.724	23.013	1.02552	24.195	18.4257	0.018334	1.20541
Dlx4	B16	22.602	22.257	22.936	0.339515	22.5983	16.8373	0.0184402	1.19847
Chd6	F12	24.918	24.076	25.277	0.616475	24.757	19.01	0.01862	1.18689
H1f0	J12	24.525	24.693	23.003	0.931022	24.0737	18.331	0.0186761	1.18333
Zc3h18	J02	24.197	24.147	23.851	0.187008	24.065	18.3233	0.018689	1.18251
Matr3	D14	23.484	23.834	22.865	0.490684	23.3943	17.6563	0.0187366	1.17951
Ets1	F14	22.473	22.675	23.327	0.446323	22.825	17.1017	0.018928	1.16758
Msh6	D22	23.005	23.234	23.731	0.371153	23.3233	17.6087	0.0190421	1.16059
Aff4	B04	23.074	22.946	22.805	0.134552	22.9417	17.2273	0.0190465	1.16032
Hnf1b	H22	22.215	22.527	22.96	0.374134	22.5673	16.861	0.0191524	1.1539
Creb1	B10	22.257	22.716	22.08	0.328254	22.351	16.677	0.0195865	1.12833
Krt14	H06	23.002	22.843	23.69	0.450191	23.1783	17.5513	0.020235	1.09216
Ilf2	D08	22.954	22.889	22.572	0.204384	22.805	17.182	0.0202912	1.08914
Hp1bp3	J18	24.633	23.858	23.074	0.779504	23.855	18.244	0.0204607	1.08012
Pbrm1	J24	23.006	23.034	21.989	0.595413	22.6763	17.0703	0.0205317	1.07638
Phax	F06	23.773	24.035	23.9	0.13102	23.9027	18.3087	0.0207032	1.06747
Rfx4	B02	23.473	22.847	22.764	0.387609	23.028	17.442	0.0208184	1.06156
Thrap3	L16	23.604	23.369	23.162	0.221148	23.3783	17.8047	0.0209971	1.05253
Mycbp2	J22	23.499	23.796	22.787	0.518529	23.3607	17.789	0.0210262	1.05107
Sfn	D24	21.972	22.053	22.325	0.184912	22.1167	16.596	0.0217828	1.01456
Dlx6	B14	22.865	22.727	21.988	0.471574	22.5267	17.0077	0.021808	1.01339
Lmnb2	J20	23.612	23.298	22.7	0.463311	23.2033	17.686	0.0218332	1.01222
Scrambled	H06	24.149	24.445	23.886	0.279662	24.16	18.6633	0.0221482	0.997824
Dlx3	B14	22.412	22.187	22.151	0.141446	22.25	16.7923	0.0227551	0.971211
Gfi1b	B24	21.579	21.752	21.989	0.205831	21.7733	16.3537	0.0233624	0.945964
Gm4301	F18	22.257	21.924	22.911	0.502124	22.364	16.963	0.0236667	0.933803
Pds5b	F04	23.798	23.575	23.504	0.153409	23.6257	18.2437	0.0239804	0.921586
E2f1	B16	22.478	22.478	21.964	0.296758	22.3067	16.9493	0.0243939	0.905963
Prpf38b	F14	23.182	23.499	22.596	0.458129	23.0923	17.7377	0.0244391	0.90429
Tet2	F02	21.637	21.933	21.748	0.149534	21.7727	16.4413	0.0248375	0.889782
Ik	D06	24.257	24.27	23.816	0.258446	24.1143	18.892	0.0267868	0.825033
Smc3	L12	23.895	23.458	22.794	0.554386	23.3823	18.2657	0.0288224	0.766765
Gm4302	F20	22.348	21.475	22.494	0.55103	22.1057	17.0047	0.0291371	0.758484
Ahnak	B06	22.007	22.251	21.954	0.158406	22.0707	16.9907	0.0295643	0.747523
Rora	L08	23.506	23.635	22.615	0.555416	23.252	18.207	0.0302903	0.729606
Foxk1	D02	22.703	21.989	22.011	0.406026	22.2343	17.3603	0.034102	0.648056
Ebna1bp2	B18	21.859	21.679	21.572	0.145039	21.7033	16.896	0.0357148	0.618791
Cd3eap	L24	21.937	22.494	22.142	0.281714	22.191	17.477	0.0381017	0.580026
Smc1a	H08	23.315	23.128	22.423	0.4704	22.9553	18.5513	0.047235	0.467873
Chaf1a	B12	21.451	21.084	21.87	0.393287	21.4683	17.358	0.0578984	0.381703
Prpf8	F16	23.8	23.711	22.394	0.787321	23.3017	19.3407	0.0642126	0.344169
Eftud2	J06	23.306	22.696	21.977	0.665245	22.6597	18.813	0.0695085	0.317947
Sart1	H04	22.226	22.482	21.503	0.507725	22.0703	18.245	0.070544	0.31328
Sf3a1	L10	23.46	22.93	22.309	0.576099	22.8997	19.1533	0.0745146	0.296586
Rbm10	F20	21.955	22.549	21.233	0.659037	21.9123	18.391	0.087091	0.253758
Snrnp200	L14	23.404	23.314	22.215	0.66202	22.9777	19.6213	0.0976434	0.226334
Gm8994	F24	22.352	Undetermined	22.829	0.33729	22.5905	19.6333	0.128767	0.171628

## Sheet: ATR-treated
Targets	Well	Replicate 1-ATR	Replicate 2-ATR	Replicate 3-ATR	SD	AVG Ct Zscan4	AVG Ct GAPDH	ATR 2^(delta CT)	CNTL 2^(delta CT)	FC (CNT-KD/ ATR-KD)
Hnrnpf	D04	28.689	25.725	26.494	1.53811	26.9693	15.455	0.000341854	0.00137375	4.01853
Rfc2	B24	26.137	25.913	26	0.112926	26.0167	14.5793	0.000360595	0.00119813	3.32265
Tfdp1	D08	27.246	27.832	26.393	0.723617	27.157	15.36	0.000281028	0.000744555	2.6494
Parp1	F02	27.783	26.27	26.503	0.814643	26.852	14.9567	0.000262511	0.000664397	2.53093
Ror1	F24	25.888	26.107	26.133	0.134575	26.0427	14.6777	0.000379135	0.000953817	2.51577
Prpf8	F16	25.846	25.988	25.85	0.0808538	25.8947	17.2427	0.00248593	0.005846	2.35164
Matr3	D14	25.481	25.4	25.479	0.0461988	25.4533	15.227	0.00083477	0.00195448	2.34134
Rfwd3	D02	26.19	26.331	26.275	0.0709953	26.2653	15.1643	0.000455267	0.00104207	2.28892
Etaa1	D24	25.733	25.76	25.7	0.03005	25.731	15.024	0.000598235	0.00125683	2.10089
Fkbp5	B24	25.29	25.057	25.325	0.145681	25.224	14.7	0.000679142	0.00138011	2.03214
Aff4	B04	27.757	27.811	25.234	1.47249	26.934	15.173	0.000288129	0.000579327	2.01066
Snrnp200	L14	25.208	25.34	24.896	0.228	25.148	17.4517	0.0048214	0.00961165	1.99354
Lmnb2	J20	25.972	26	26.43	0.256726	26.134	15.0347	0.000455793	0.000903618	1.98252
Npm1	B20	25.026	27.12	26.238	1.05132	26.128	14.618	0.000342882	0.000655402	1.91145
Sin3b	D06	26.435	27.365	27.971	0.773674	27.257	15.459	0.000280833	0.00051505	1.83401
Foxo1	J10	26.1	25.954	26.323	0.185834	26.1257	15.403	0.000591774	0.00107608	1.8184
Tpr	H16	26.6	26.585	26.702	0.0636632	26.629	15.553	0.000463225	0.000826136	1.78344
Elf1	B20	25.966	24.883	27.269	1.19469	26.0393	14.5667	0.000351871	0.000627397	1.78303
Pnisr	L02	26.757	27.475	25.943	0.766501	26.725	15.1383	0.000325137	0.000577056	1.77481
Ahnak	B06	26.917	25.933	24.982	0.967547	25.944	15.1937	0.000580533	0.00102488	1.76541
Ilf2	D08	26.843	27.124	26.144	0.504639	26.7037	15.3793	0.000389974	0.000684181	1.75443
Hist1h2aa	B12	25.849	27.264	26.023	0.771641	26.3787	14.8797	0.000345506	0.000604348	1.74917
Mybbp1a	D24	26.134	25.481	26.815	0.667049	26.1433	14.6763	0.000353256	0.000593417	1.67985
Khsrp	D10	26.998	25.83	26.769	0.618922	26.5323	15.0433	0.00034791	0.000574131	1.65023
Eftud2	J06	25.503	25.399	25.183	0.163234	25.3617	16.2147	0.00176392	0.00288143	1.63354
Noc2l	D16	25.882	27.265	25.888	0.796749	26.345	15.1643	0.000430808	0.000666704	1.54756
U2surp	L20	26.354	26.293	26.291	0.0358097	26.3127	14.9853	0.000389164	0.000598512	1.53794
Tcf12	N04	27.03	27.324	24.997	1.26718	26.4503	15.4203	0.000478233	0.000726038	1.51817
Rbm10	F20	23.04	23.414	23.329	0.196054	23.261	16.029	0.00665198	0.00994831	1.49554
Etv1	F06	26.41	27.46	28.657	1.1243	27.509	15.332	0.000215952	0.00031537	1.46037
Chd4	B08	26.938	27.115	25.524	0.871972	26.5257	15.3047	0.000418931	0.000595339	1.42109
Dek	B06	25.586	26.048	27.321	0.898536	26.3183	14.9327	0.000373743	0.000524295	1.40282
Smc1a	H08	25.356	25.5	25.778	0.214517	25.5447	15.574	0.000996622	0.00136268	1.3673
Zbtb18	B02	26.999	27.177	24.985	1.21743	26.387	15.0947	0.000398721	0.000543789	1.36383
Sart1	H04	25.883	25.12	25.363	0.38979	25.4553	15.8087	0.00124757	0.00169285	1.35692
Top1	D10	26.68	26.987	27.736	0.543198	27.1343	15.2537	0.000265194	0.000348876	1.31555
Top2b	H14	25.743	26.834	28.188	1.22486	26.9217	15.508	0.000366559	0.00047746	1.30255
Mycbp2	J22	25.539	25.092	25.91	0.409588	25.5137	15.153	0.000760551	0.000989737	1.30134
Mcm7	D20	25.205	25.1	24.901	0.154403	25.0687	14.9547	0.000902366	0.00117185	1.29864
Ebna1bp2	B18	25.6	25.706	25.343	0.186661	25.5497	15.572	0.000991798	0.00128057	1.29116
Parp3	B22	25.538	27.251	25.761	0.931325	26.1833	14.933	0.000410499	0.000510312	1.24315
Stat3	H12	24.926	24.663	24.665	0.151269	24.7513	15.0943	0.00123866	0.00152286	1.22944
Sox11	D22	27.597	25.866	25.373	1.16802	26.2787	14.999	0.000402237	0.000492701	1.2249
Prpf38b	F14	25.472	26.512	25.8	0.531684	25.928	15.5233	0.000737706	0.000903409	1.22462
Atoh1	B04	24.934	26.204	25.283	0.656118	25.4737	14.7507	0.000591637	0.000721857	1.2201
E2f8	B10	25.638	25.553	25.467	0.0855005	25.5527	15.1063	0.000716705	0.000839606	1.17148
Smc3	L12	27.306	26.377	25.954	0.691601	26.5457	15.5003	0.000473177	0.000538413	1.13787
Ncl	B18	24.945	24.083	25.609	0.765138	24.879	15.41	0.00141106	0.00159673	1.13158
Foxk1	D02	25.3	25.392	25.221	0.0855823	25.3043	15.2333	0.000929666	0.00103153	1.10957
Zbtb7a	H24	25.988	25.326	26.417	0.549631	25.9103	14.7093	0.000424779	0.000461835	1.08724
Pnn	F10	26.199	25.996	25.554	0.329797	25.9163	15.1907	0.000590544	0.000629866	1.06659
Elof1	B22	25.306	25.238	26.613	0.774973	25.719	14.6927	0.00047945	0.000510666	1.06511
Map2k2	B16	25.042	25.429	25.785	0.371608	25.4187	14.7547	0.000616334	0.000653134	1.05971
Setdb1	D04	25.068	25.207	25.718	0.342282	25.331	15.1277	0.000848185	0.000897583	1.05824
Ewsr1	J08	25.73	25.651	25.851	0.100732	25.744	15.42	0.000780129	0.000822897	1.05482
Mcm5	D18	26.995	26.395	25.996	0.502859	26.462	15.3637	0.000456109	0.000470451	1.03144
Creb1	B10	25.901	25.819	24.775	0.627765	25.4983	15.014	0.000698074	0.000694695	0.99516
Dlx6	B14	25.94	25.944	24.975	0.558301	25.6197	15.052	0.000658894	0.000649672	0.986005
Rreb1	N02	25.486	25.519	25.5	0.016563	25.5017	14.9707	0.000675854	0.000663477	0.981686
Rora	L08	26.193	25.199	25.664	0.497343	25.6853	15.3017	0.000748523	0.000731426	0.97716
Hp1bp3	J18	25.025	25.847	25.632	0.426294	25.5013	15.2317	0.00081007	0.000766727	0.946495
Ybx1	H22	25.464	25.388	26.192	0.44388	25.6813	14.9947	0.000606726	0.000572806	0.944092
Ik	D06	26.956	26.663	26.009	0.484832	26.5427	16.888	0.00124067	0.0011686	0.941914
Atf4	B02	25.575	26.59	24.289	1.15316	25.4847	14.7417	0.000583492	0.000540906	0.927016
Sf3a1	L10	24.955	24.807	25.42	0.319869	25.0607	16.61	0.00285822	0.00264106	0.924023
Donson	B08	25.924	25.415	25.675	0.25452	25.6713	14.828	0.000544291	0.000501082	0.920613
Rbm15	L06	27.555	27.028	25.009	1.34389	26.5307	15.3643	0.00043511	0.000387818	0.89131
Nrf1	F04	24.767	25.051	25.033	0.159026	24.9503	15.0287	0.00103105	0.000889532	0.862741
Sp1	H10	27.769	27.16	26.999	0.406141	27.3093	15.9623	0.000383895	0.000324311	0.844791
Sox1	D20	24.89	25.682	25.802	0.495548	25.458	14.9867	0.000704392	0.000589863	0.837406
Pds5b	F04	26.815	26.849	27.125	0.170016	26.9297	15.733	0.000426057	0.000345986	0.812065
Zc3h18	J02	26.654	26.77	24.79	1.11118	26.0713	15.2083	0.000536922	0.000433604	0.807574
Pbrm1	J24	24.632	25.443	25.913	0.64802	25.3293	14.8823	0.000716374	0.00057679	0.805152
Hist1h4h	D14	26.208	25.681	24.419	0.91932	25.436	15	0.000721857	0.000574794	0.796272
Rax	D18	24.882	26.886	26.088	1.0089	25.952	14.8947	0.000469257	0.000358104	0.76313
Dido1	B12	26.649	25.823	25.197	0.728292	25.8897	14.8253	0.000466986	0.000355713	0.76172
Dhx9	J04	28.637	26.131	26.536	1.34525	27.1013	15.841	0.000407664	0.000306534	0.751928
E2f1	B16	25.779	24.93	25.502	0.432958	25.4037	14.8817	0.000680084	0.000489976	0.720465
Mcm3	D16	26.321	27.025	26.185	0.450872	26.5103	15.4083	0.000454951	0.000326416	0.717475
Utp3	H20	25.747	26.562	26.069	0.410479	26.126	15.3687	0.000577723	0.000406347	0.703359
H1f0	J12	27.183	26.766	25.407	0.928704	26.452	15.4573	0.00049009	0.000341144	0.696084
Lmna	D12	26.153	26.118	26.378	0.141097	26.2163	15.2283	0.00049236	0.000323937	0.657927
Scrambled	H06	26.3	26.262	26.386	0.0635295	26.316	15.749	0.000659198	0.000424485	0.643941
Hnrnpa0	B14	24.385	25.982	25.545	0.825326	25.304	14.948	0.000763016	0.000486817	0.638017
Thrap3	L16	25.329	25.528	26.054	0.374589	25.637	15.2233	0.000733118	0.000466555	0.636397
E2f7	D12	25.308	27.59	25.796	1.20167	26.2313	15.198	0.000477129	0.000303573	0.63625
Kdm1a	F02	25.486	25.362	27.594	1.25438	26.1473	15.1447	0.00048738	0.000309451	0.634929
Hnrnpm	J16	26.861	25.204	27.218	1.07465	26.4277	15.3827	0.000473286	0.000283113	0.598186
Phf8	F08	27.542	25.574	27.245	1.06093	26.787	15.555	0.000415749	0.000238399	0.573421
Cd3eap	L24	24.36	24.625	24.5	0.132571	24.495	14.784	0.00119316	0.000671651	0.562919
Rfc1	F22	25.803	25.997	25.567	0.215342	25.789	15.0077	0.000568192	0.000312397	0.549808
Trp53bp1	H18	26.01	26.148	26.702	0.366248	26.2867	15.2793	0.000485806	0.000260337	0.535887
Prkdc	F12	25.805	27.171	25.721	0.813993	26.2323	15.5177	0.000595064	0.000313409	0.526681
Phax	F06	26.909	26.469	27.579	0.558957	26.9857	15.7503	0.000414789	0.000215205	0.51883
Vcp	L22	25.651	25.55	25.572	0.0531131	25.591	16.76	0.00219586	0.00112203	0.510978
Ror2	H02	26.344	25.16	25.088	0.705287	25.5307	15.164	0.000757395	0.000377126	0.497925
Msh6	D22	24.844	26.829	25.101	1.07953	25.5913	15.122	0.000705369	0.000286469	0.406126
Hebp1	J14	25.52	25.3	25.101	0.209588	25.307	15.2797	0.000958235	0.000357113	0.372678
Rbbp6	L04	26.282	27.724	25.553	1.10484	26.5197	15.395	0.000447859	0.000136829	0.305519
Pspc1	F18	25.9	26.223	25.727	0.251752	25.95	18.764	0.0068675	0.000778508	0.113361
