# Supplementary material for: ATR expands embryonic stem cell fate potential in response to replication stress
Source: eLife. 2020 Mar 12;9:e54756. doi: 10.7554/eLife.54756 (PMC7067586; doi:10.7554/eLife.54756)
Supplement: Supplementary file 7. [file elife-54756-supp7.xlsx]

## Sheet: Sheet1
Supplementarmass-spectrometryy Table 7. List of Dux RNA-bound factors identified through mass-spectrometry
Identified Proteins	Accession Number	Molecular Weight	Unique Peptide Count
Elongation factor 2 OS=Mus musculus GN=Eef2 PE=1 SV=2	P58252 (+12)	95 kDa	8
Elongation factor 1-alpha 1 OS=Mus musculus GN=Eef1a1 PE=1 SV=3	P10126 (+3)	50 kDa	7
Elongation factor 1-delta OS=Mus musculus GN=Eef1d PE=1 SV=1	A0A0R4J1E2 (+9)	73 kDa	5
Protein Rps2-ps6 OS=Mus musculus GN=Rps2-ps6 PE=3 SV=1	A0A140T8L5 (+10)	24 kDa	5
Eukaryotic translation elongation factor 1 gamma OS=Mus musculus GN=Eef1g PE=1 SV=1	Q4FZK2 (+1)	50 kDa	4
Heterogeneous nuclear ribonucleoprotein A2/B1 OS=Mus musculus GN=Hnrnpa2b1 PE=2 SV=1	B7ZP22 (+1)	36 kDa	4
Eukaryotic initiation factor 4A-I OS=Mus musculus GN=Eif4a1 PE=1 SV=1	P60843 (+5)	46 kDa	3
Heterogeneous nuclear ribonucleoprotein A1 OS=Mus musculus GN=Hnrnpa1 PE=1 SV=2	P49312 (+5)	34 kDa	3
Heterogeneous nuclear ribonucleoprotein A3 OS=Mus musculus GN=Hnrnpa3 PE=1 SV=1	A2AL12 (+4)	34 kDa	3
Poly(RC) binding protein 2 OS=Mus musculus GN=Pcbp2 PE=2 SV=1	B2M1R7 (+6)	38 kDa	3
Poly(rC)-binding protein 1 OS=Mus musculus GN=Pcbp1 PE=1 SV=1	P60335	37 kDa	3
60S ribosomal protein L12 OS=Mus musculus GN=Rpl12 PE=1 SV=2	P35979 (+4)	18 kDa	2
60S ribosomal protein L8 OS=Mus musculus GN=Rpl8 PE=1 SV=2	P62918 (+1)	28 kDa	2
G-rich sequence factor 1 OS=Mus musculus GN=Grsf1 PE=1 SV=2	Q8C5Q4	53 kDa	2
Polyadenylate-binding protein 1 OS=Mus musculus GN=Pabpc1 PE=1 SV=2	P29341 (+3)	71 kDa	2
Polyadenylate-binding protein 2 OS=Mus musculus GN=Pabpn1 PE=1 SV=1	G3UX74 (+2)	7 kDa	2
RuvB-like helicase (Fragment) OS=Mus musculus GN=Ruvbl1 PE=1 SV=1	D3YW60 (+3)	15 kDa	2
Transcriptional activator protein Pur-beta OS=Mus musculus GN=Purb PE=1 SV=3	O35295	34 kDa	2
