# Supplementary material for: ATR expands embryonic stem cell fate potential in response to replication stress
Source: eLife. 2020 Mar 12;9:e54756. doi: 10.7554/eLife.54756 (PMC7067586; doi:10.7554/eLife.54756)
Supplement: Supplementary file 8. [file elife-54756-supp8.xlsx]

## Sheet: Sheet1
Supplementary Table 8. List of primers used in this study.
Oligo	Forward	Reverse
Dux	AAAGGAAGAGCATGTGCCAGC	GCAGTAAGCTGTCCTGGGAAC
Eif1a	AACAGGCGCAGAGGTAAAAA	GCACAGCCTCCTTACACCAT
GM4340	TGGCAGCATGACCTGTTCAT	CCAGCTCCTCTGCAGATAGC
GM12794	AACTCAAGTGTCTCCAGCATC	AGAGTTGGCAGCGATTCATAG
GM4981	ATTTGAGAGGAACCCACGAC	AGTCTTGATCTTGAGCTGTGG
MERVL	ATCTCCTGGCACCTGGTATG	AGAAGAAGGCATTTGCCAGA
Nanog	CAAAGGATGAAGTGCAAGCG	CCAGATGCGTTCACCAGATAG
Pou5f1	TCTTTCCACCAGGCCCCCGGCTC	TGCGGGCGGACATGGGGAGATCC
Gapdh	CTTTGTCAAGCTCATTTCCTGG	TCTTGCTCAGTGTCCTTGC
Prl2c2	AGAGACAAAAGCCCCATGAG	ACTCACTAGATCGTCCAGAGG
Rex1	CAAAGACAAGTGGCCAGAAAG	GGAGCTTCCACTCTGGTATTC
Tcstv3	ACCAGCTGAAACATCCATCC	CCATGGATCCCTGAAGGTAA
Tdpoz3	GGACAGAAGAGGACACCTGC	CCAAGTGGGGATGGGACTTC
Zscan4	GAGATTCATGGAGAGTCTGACTGATGAGTG	GCTGTTGTTTCAAAAGCTTGATGACTTC
Zscan4d	GTCCTGACAGAGGCCTGCC	GAGATGTCTGAAGAGGCAAT
Trp53	ATGTTCCGGGAGCTGAATG	CCCCACTTTCTTGACCATTG
Zscan4c	CCGGAGAAAGCAGTGAGGTGGA	CGAAAATGCTAACAGTTGAT
Luciferase	GCCAAAAGCACTCTGATTGAC	CCATATCCTTGCCTGATACCTG
ETAA1-AAD	CCGCCCTGTGCAGTAAAA	ACAGTGAGTCCATTTTCAGCG
ETAA1	GACAAAGCAGTTAGGTAAAGGAAG	TTTCACCAATCCATACTCCCAG
Exo-Dux	CAGGACTGGACACAAGCTC	CCCAGCTCCCCTCCTT
Prl2c2	AGAGACAAAAGCCCCATGAG	ACTCACTAGATCGTCCAGAGG
Tbp	AAGAAAGGGAGAATCATGGACC	GAGTAAGTCCTGTGCCGTAAG
